# Supplementary material for: Proteomic Analysis of Retinal Tissue in an S100B Autoimmune Glaucoma Model
Source: MDPI journal article supplement (doi:10.3390/biology11010016), 2021-12-23
Supplement: s1 [file s1]

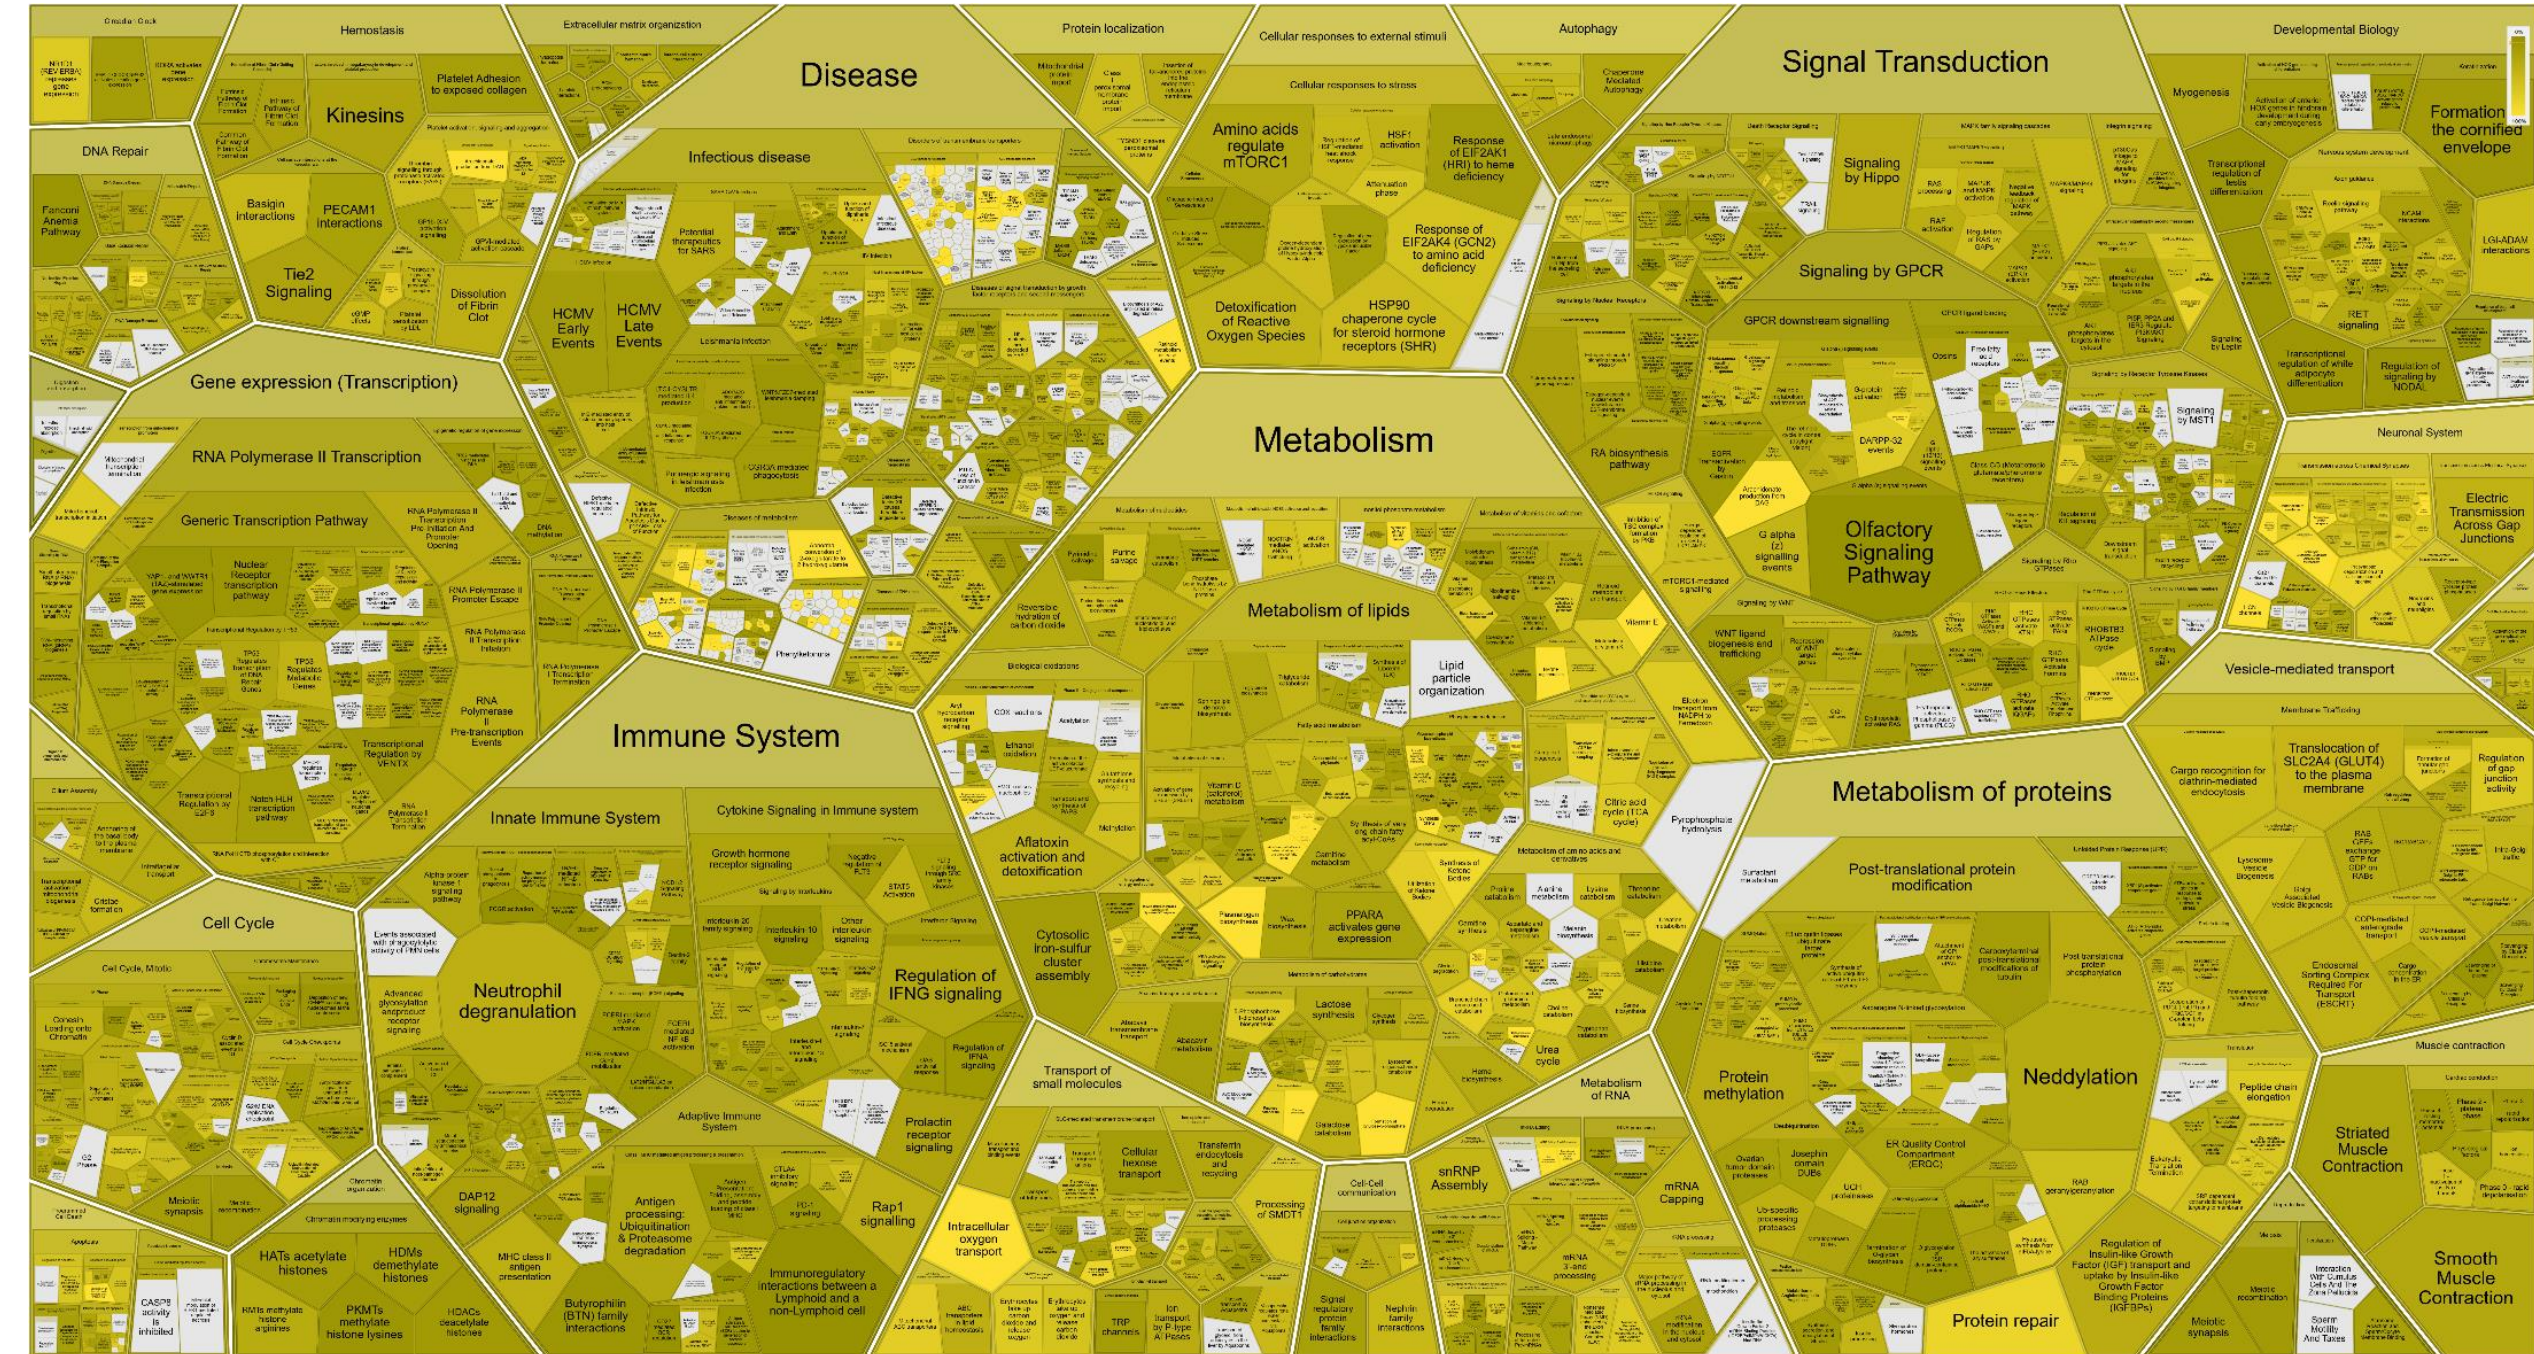

**Figure S1: Pathway analysis of rat retina-specific spectral library proteins.** Detailed pathway overview of 2725 spectral library proteins (out of 4689 proteins), where 1988 pathways were hit by at least one of them. Each cell represents a biological pathway. From copper to yellow with increasing overrepresentation.



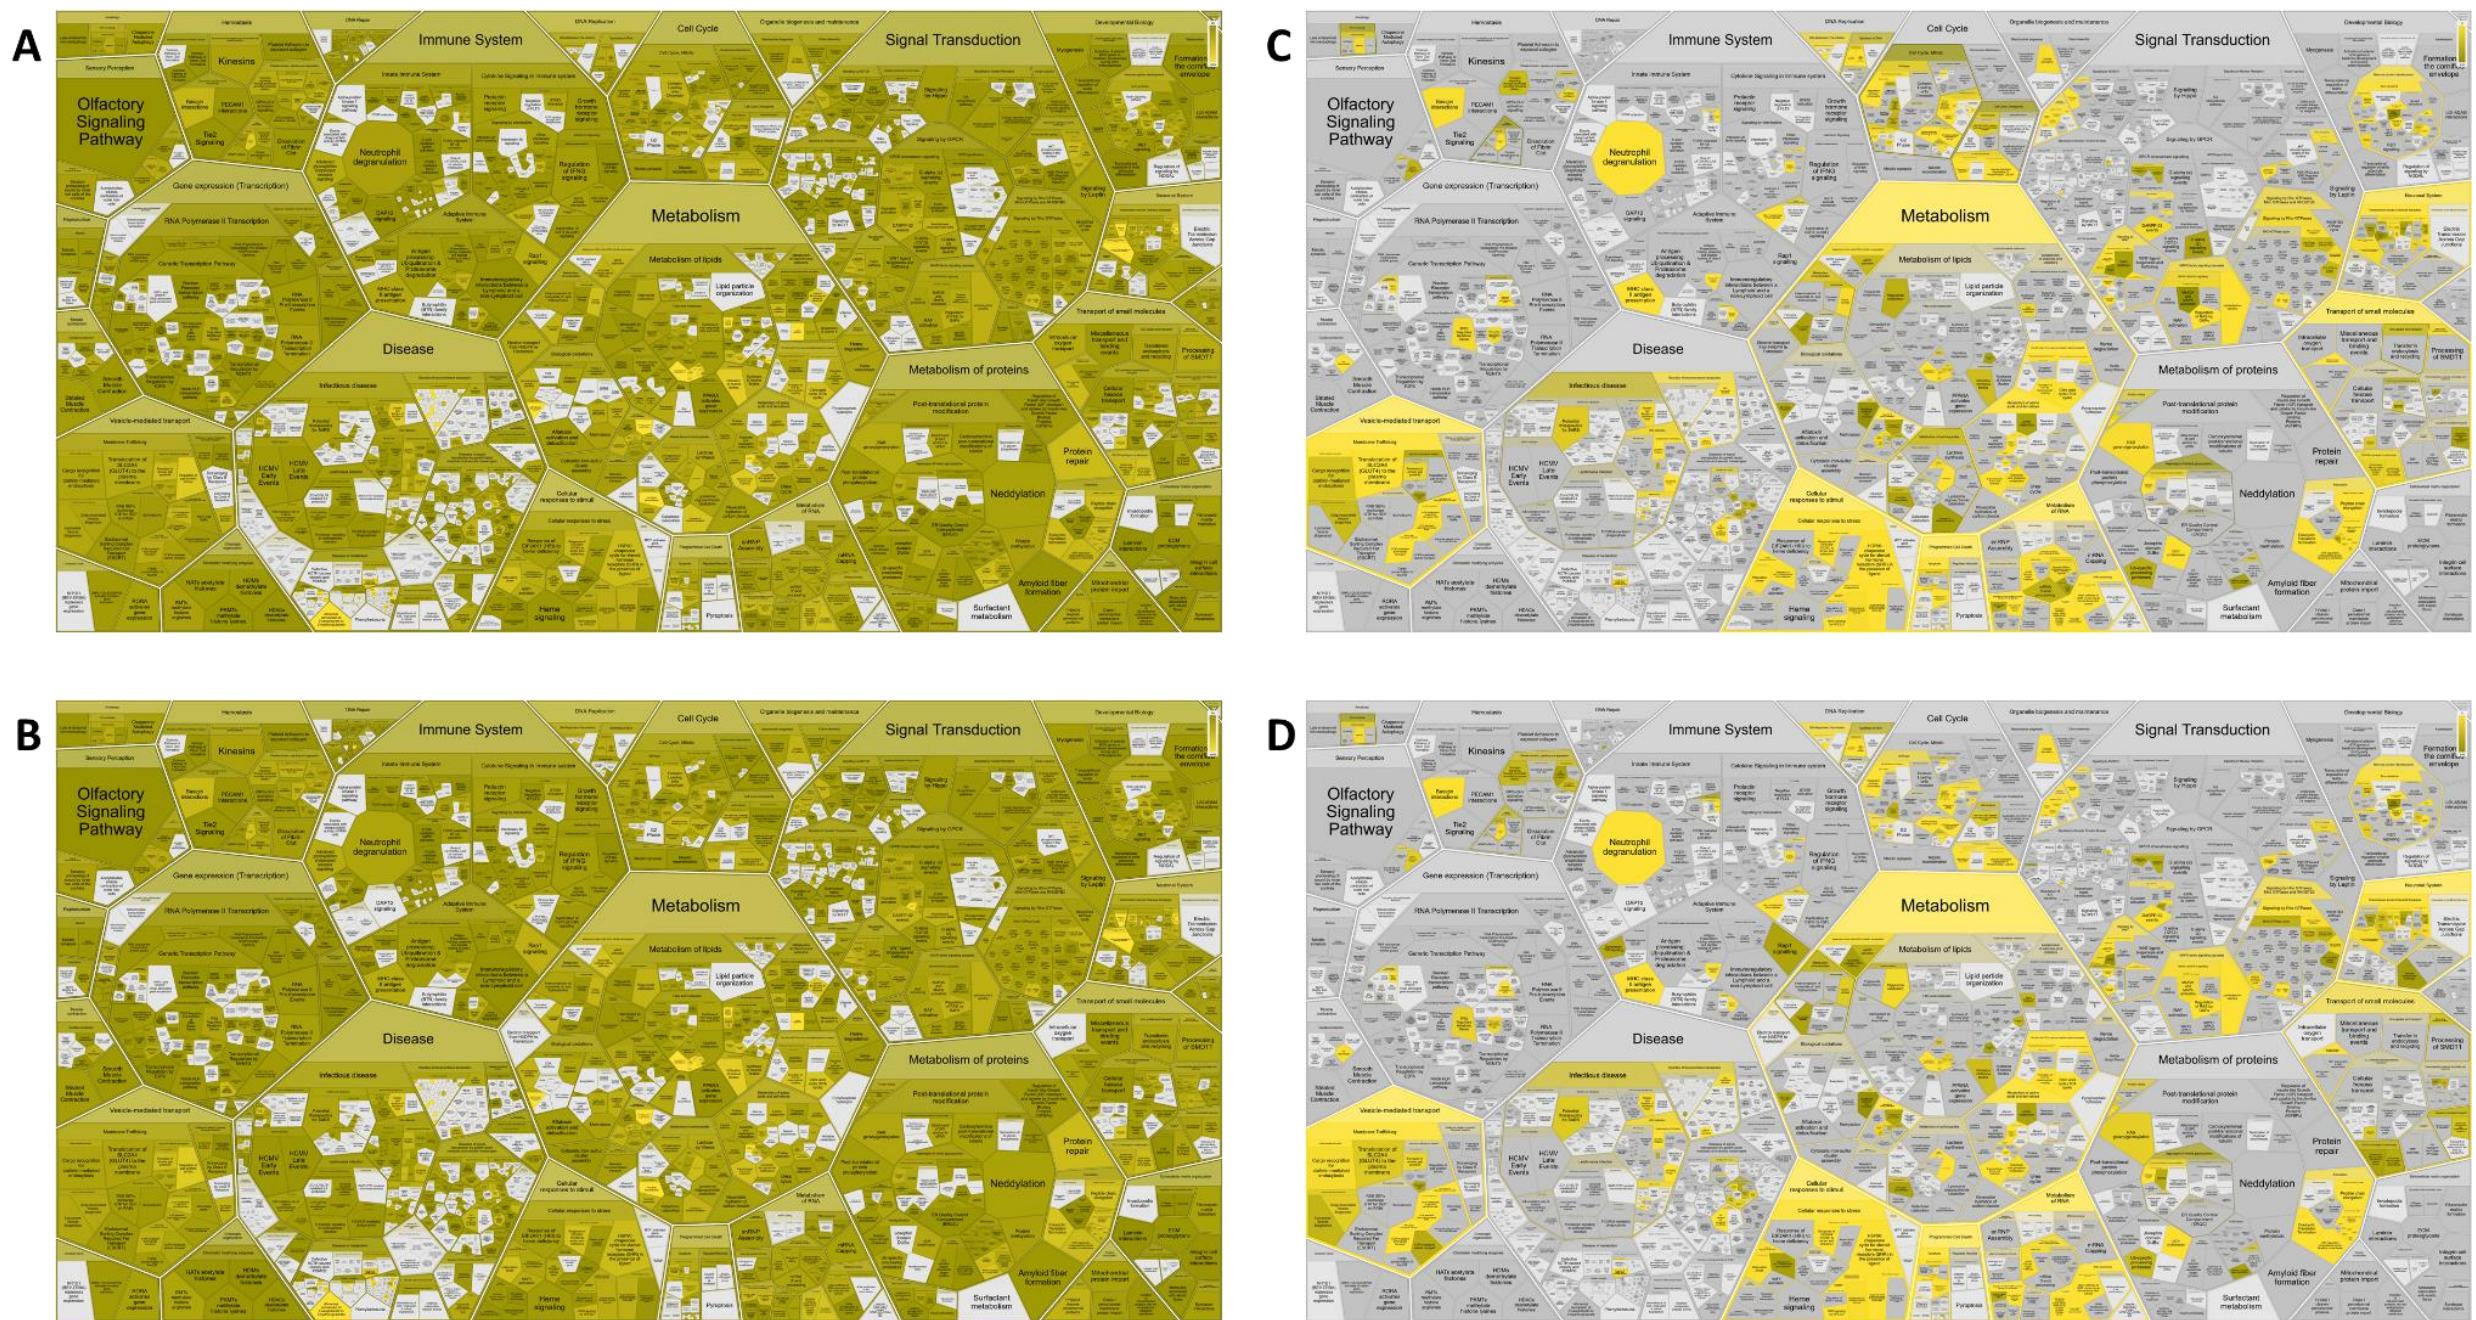

**Figure S2:** Pathway analysis of retinal proteins 7 (A, B) and 14 days (C, D) after S100B immunization. **A)** Pathway overview of 1641 biological pathways associated with 1225 proteins (out of 1744 proteins). **B)** Overrepresentation of significant pathways based on identified proteins 7 days after S100B immunization. **C)** Pathway overview of 1234 proteins (out of 1752 proteins), where 1637 pathways were hit by at least one of them. **D)** Overrepresentation of significant pathways based on identified proteins 14 days after S100B immunization. \*From copper to yellow with increasing overrepresentation. \*From yellow to copper to a more significant p-value (Benjamini–Hochberg procedure).



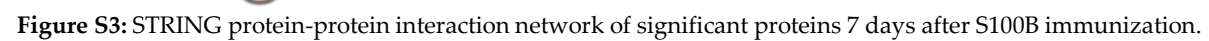

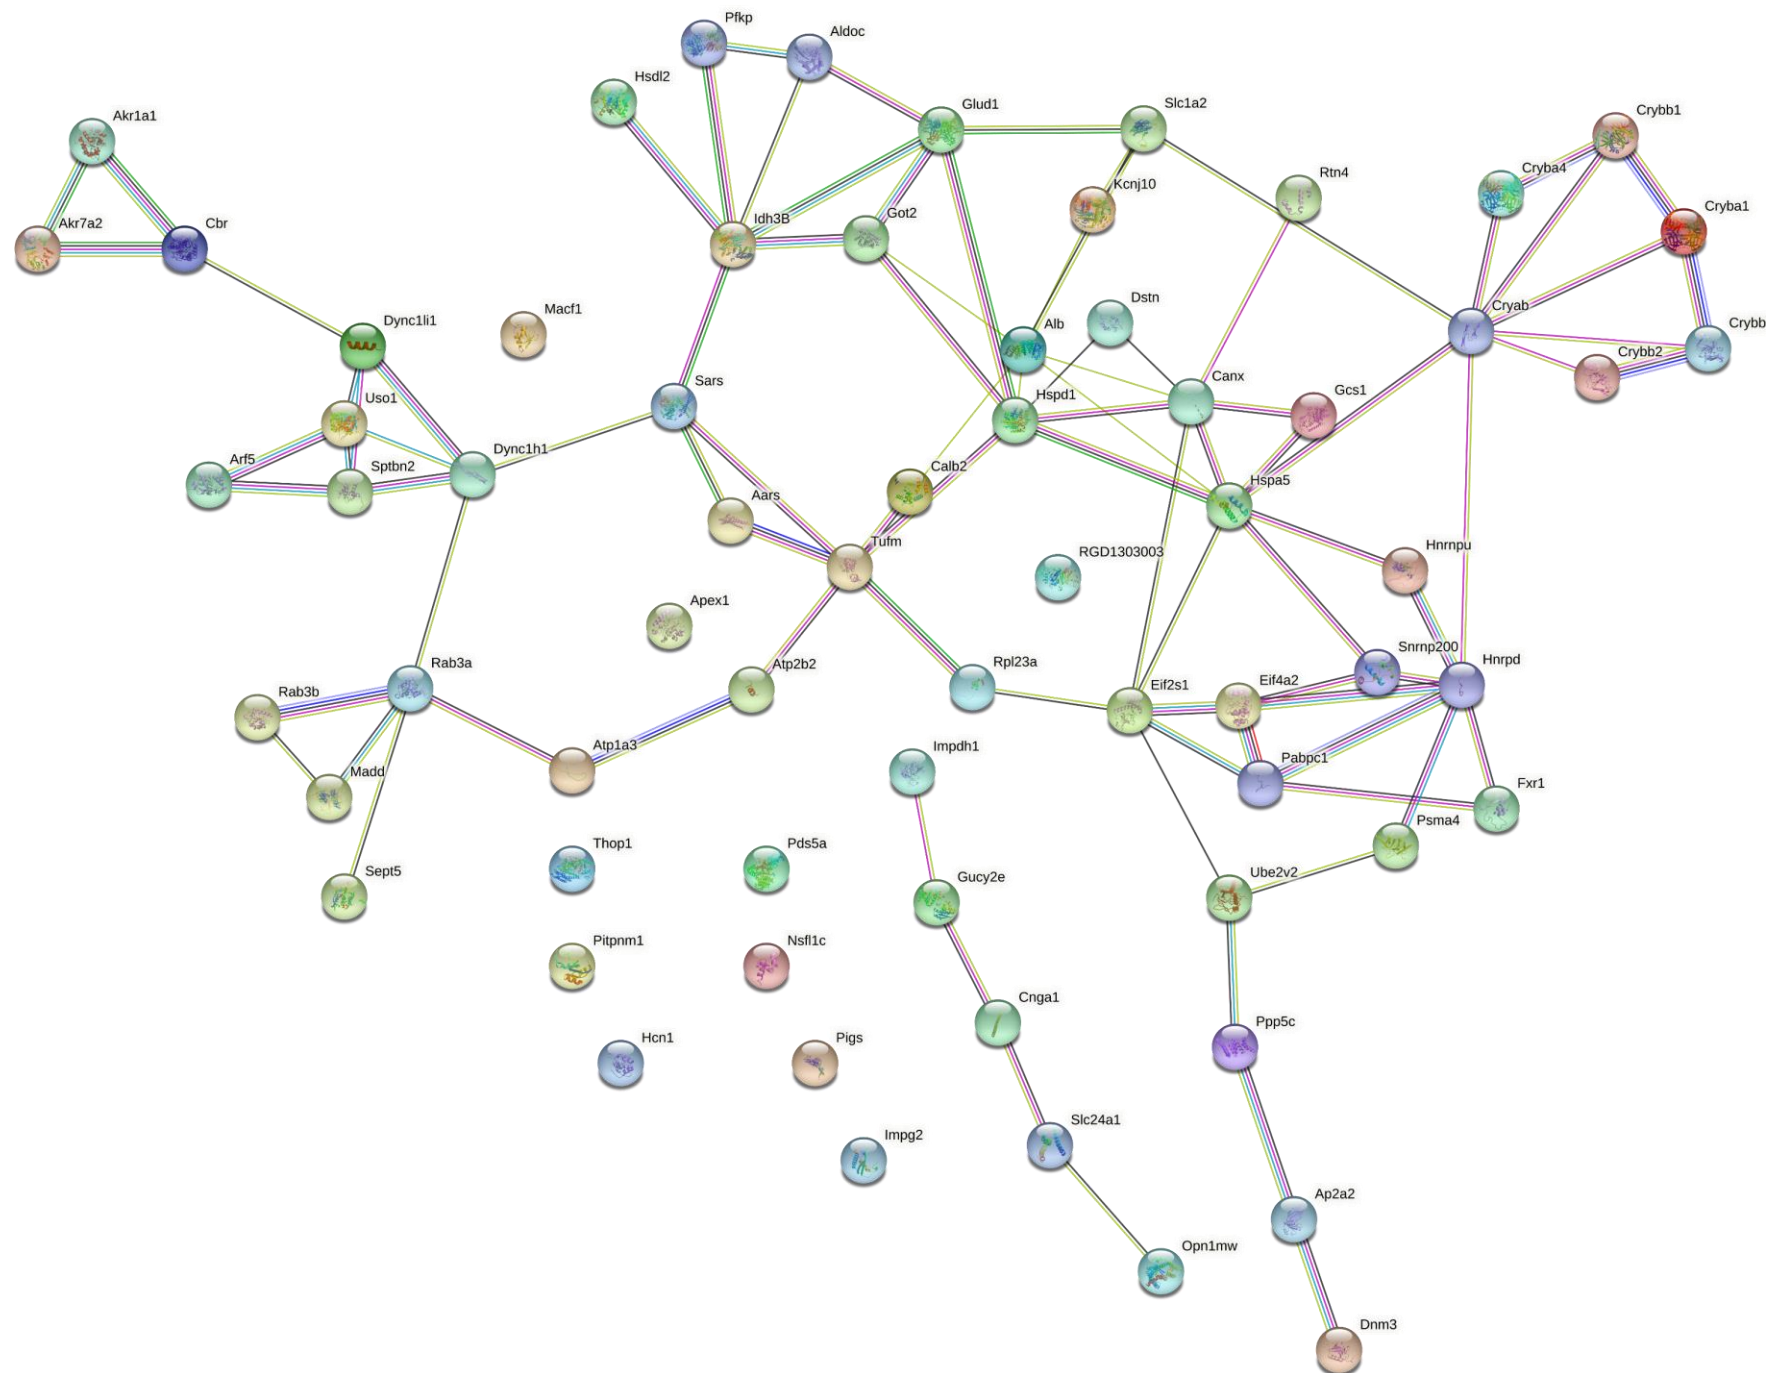

**Figure S4:** STRING protein-protein interaction network of significant proteins 14 days after S100B immunization.
