# Supplementary material for: Proteomic Analysis of Retinal Tissue in an S100B Autoimmune Glaucoma Model
Source: MDPI journal article supplement (doi:10.3390/biology11010016), 2021-12-23
Supplement: s1 [file s1]

**Table S1:** Primary and secondary antibodies used for immunohistology.

| Primary antibody               | Company          | Dilution | Secondary antibody                  | Company                | Dilution |
|--------------------------------|------------------|----------|-------------------------------------|------------------------|----------|
| Anti- $\alpha$ 2-macroglobulin | Thermo Fisher    | 1:100    | Donkey anti-rabbit Alexa Fluor 555  | Invitrogen             | 1:500    |
| Anti-Calretinin                | Millipore        | 1:2000   | Donkey anti-goat Alexa Fluor 488    | Dianova                | 1:500    |
| Anti-GFAP                      | Millipore        | 1:700    | Donkey anti-chicken Alexa Fluor 488 | Jackson ImmunoResearch | 1:500    |
| Anti-HSP60                     | Sigma-Aldrich    | 1:100    | Donkey anti-rabbit Alexa Fluor 555  | Invitrogen             | 1:500    |
| Anti-IMPG1                     | Novus Biological | 1:100    | Donkey anti-rabbit Alexa Fluor 555  | Invitrogen             | 1:500    |
| Anti-IMPG2                     | Sigma-Aldrich    | 1:100    | Donkey anti-rabbit Alexa Fluor 555  | Invitrogen             | 1:500    |
| Anti-PLS3                      | Sigma-Aldrich    | 1:100    | Donkey anti-rabbit Alexa Fluor 555  | Invitrogen             | 1:500    |
| Anti-RBPMS                     | Millipore        | 1:500    | Donkey anti-rabbit Alexa Fluor 555  | Invitrogen             | 1:500    |
