# Supplementary material for: Proteomic Analysis of Retinal Tissue in an S100B Autoimmune Glaucoma Model
Source: Biology (Basel). 2021 Dec 23;11(1):16. doi: 10.3390/biology11010016 (PMC8773367; doi:10.3390/biology11010016)
Supplement: Supplementary file 1 [file biology-11-00016-s001.zip]

Archive with 4 entries (4 files):
- Supplementary figures.pdf
- Table S1.pdf
- Table S2.xlsx
- Table S3.xlsx
