# Supplementary material for: Proteomic Analysis of Retinal Tissue in an S100B Autoimmune Glaucoma Model
Source: Biology (Basel). 2021 Dec 23;11(1):16. doi: 10.3390/biology11010016 (PMC8773367; doi:10.3390/biology11010016)
Supplement: Supplementary file 1 [file biology-11-00016-s001.zip › Table S2.xlsx]

## Sheet: table S2
Peptide Sequence	Protein Accession	Protein Description	[1] Control	[2] Control	[3] Control	[4] Control	[5] Control	[6] Control	[7] Control	[8] Control	[9] S100B	[10] S100B	[11] S100B	[12] S100B	[13] S100B	[14] S100B	[15] S100B	[16] S100B
LTSAVPGADIK	A0A0G2JUG7	IQ motif and SEC7 domain-containing protein 1	4748.83	5215.49	5144.29	4929.61	5227.65	6377.24	4233.85	N/A	4269.59	4109.88	5375.34	5813.27	4963	5298.62	4764.51	5040.33
EGLEEGDQILR	A0A0G2K2P5	Tight junction protein ZO-1	2689.14	2936.19	2601.1	2560.21	2585.14	3060.97	2133.83	3311.08	1914.68	2198.56	3047.3	2911.89	2701.34	1855.43	3159.15	1853.61
EEAVLFLLDLPK	A0JPJ7	Tight junction protein ZO-1	1067.43	549.872	600.018	254.099	2306.24	2204.08	N/A	769.521	N/A	323.916	511.988	1294.7	668.291	1675.16	N/A	589.783
IGIVGLPNVGK	A1A5S1	Obg-like ATPase 1	12646.1	13100.1	16788.5	10267.3	15007.1	15236.5	11533.7	11958.6	17771.8	11099.2	18583.8	10995.5	10764.6	14006.1	13390.5	14674.7
IPAFLNVVDIAGLVK	A2RUW1	Obg-like ATPase 1	2713.86	879.952	1245.77	395.773	1366.37	N/A	1782.19	1381.11	2860.89	386.304	2110.31	722.517	1171.16	1646.28	N/A	2615.21
AFEDDDITHVEGSVDPIR	A2VCX1	Obg-like ATPase 1	9004.94	5273.49	5086.26	3428.36	N/A	5617.08	4143.16	6094.19	5941.84	3594.68	5765.17	7253.48	5203.24	4944.76	5328.48	5610.87
NYIVEDGDIIFFK	A4L9P7	Obg-like ATPase 1	3546.11	2816.03	2784.1	1338.63	2472.78	2391.11	1854.22	5384.61	4332.35	2071.81	2197.86	3975.15	2456.35	1926.18	N/A	3106.17
AAVELEEPEDAR	A7VJC2	Pre-mRNA-processing factor 6	2247.96	3132.14	2493.19	3110.39	3887.65	4154.19	2261.36	3803.51	2650.11	2838.65	4003.49	3847.47	3588.87	2524.28	2953.04	3223.4
LTPVPDSFFAK	B0BMW8	Pre-mRNA-processing factor 6	1604.25	2011.26	N/A	1880.13	3092.86	2740.48	2193.34	2594.2	4292.38	1821.99	3478.6	2683.27	2053.03	N/A	N/A	1849.99
LSITVVQAK	B0BN85	Toll-interacting protein	3274.28	3471.96	4894.78	3500.8	3507.44	3652.01	3271.76	2966.08	3729.81	3052.53	4433.32	N/A	4055.28	4465.97	2662.46	3351.92
GPVYIGELPQDFLR	B0BN93	Toll-interacting protein	8105.54	4572.55	4408.06	1727.47	5273.87	7918.63	3772.82	7035.4	7990.51	2690.21	5577.61	5947.73	4497.21	9334.24	18706.4	7013.91
GTLLGESLK	B0BNA5	TIP41-like protein	7447.84	4799.47	6563.47	4565.85	5396.9	4855.43	6151.98	4710.49	5500.7	4479.43	6817.07	6837.52	5224.59	7155.53	5827.67	5200.53
IISVTPVK	B0BND0	Sister chromatid cohesion protein PDS5 homolog A	4558.03	2958.13	3156.27	4131.08	N/A	4669.12	5406.8	4276.75	4221.19	3629.55	4680.67	N/A	4038.35	4284.82	N/A	4329.23
EVQLAQIFEPLSR	B0BNE5	Sister chromatid cohesion protein PDS5 homolog A	1192.21	1018.81	1762.41	735.456	N/A	N/A	1179.61	1998.47	N/A	974.254	1010.33	1135.43	1905.39	2164.83	2055.64	2016.14
GFGFVTFDDHDPVDK	B0BNF1	Heterogeneous nuclear ribonucleoproteins A2/B1	24464	24948.8	12541.7	17320	23409	33297.6	9595.97	21855.4	39952.9	13476	27601.1	26223.9	15867.6	15316	11709.1	20877.9
TLETVPLER	B0BNM1	Heterogeneous nuclear ribonucleoproteins A2/B1	33929.1	33095.3	14112.9	26667	30496.4	42271.9	14703.9	32150.2	39452.8	19767.3	32396.8	34761.6	24056.4	25800.2	22288.5	24676
LFIGGLSFETTEESLR	B0BNN3	Heterogeneous nuclear ribonucleoproteins A2/B1	38847.5	11456.3	8818.62	6653.14	21852.4	18392.1	9574.36	33024	35655.5	6122.01	16982.2	26888.3	14918.8	20762.2	4899.58	14103.5
LTDCVVMR	B0K020	Heterogeneous nuclear ribonucleoproteins A2/B1	2868.04	2526.76	2250.13	3053.83	1399.71	5688.78	1726.95	3428.43	5164.3	2259.9	925.288	6273.25	2081.49	1774.87	N/A	2834.36
IDTIEIITDR	B1WC61	Heterogeneous nuclear ribonucleoproteins A2/B1	267816	227567	105312	145360	211898	315336	92009.4	242007	408764	107934	250328	318974	145631	178428	200152	151392
GGGGNFGPGPGSNFR	B2GUZ5	Heterogeneous nuclear ribonucleoproteins A2/B1	165389	156868	78881.7	139605	119799	195152	62725.9	159128	195268	93021.3	137813	172250	136033	138520	128346	135900
NMGGPYGGGNYGPGGSGGSGGYGGR	B2GV06	Heterogeneous nuclear ribonucleoproteins A2/B1	2635.53	2739.39	2785.7	4546.2	3164.74	3867.95	739.827	4366.13	4005.1	2618.63	5460.98	2986.54	3208.54	3723.68	2235.81	2662.64
NQVIAPLTEELVFR	B2GV22	CAAX prenyl protease 2	1659	1380.15	1090.41	484.314	1575.88	1743.84	1153.15	1141.1	1725.44	655.863	1854.91	1450.15	1431.35	2330.35	2031.58	1489.96
SLELNPNNSTALLR	B2GV54	Protein SGT1 homolog	5952.11	3131.28	3244.29	2113.95	4453.08	N/A	4037.68	4232.62	4442.91	1912.89	N/A	5614.86	3676.32	6419.32	7810.58	5609.33
DYASALETFAEGQK	B2RYG6	Protein SGT1 homolog	656.5	506.907	369.593	347.279	N/A	600.481	657.211	N/A	223.954	703.188	944.265	321.071	634.663	N/A	590.411	903.714
VLDLQQIK	B2RYW9	26S proteasome non-ATPase regulatory subunit 13	6804.18	6213.1	6298.28	4792.45	5405.66	6119.63	6439.59	6029.74	6800.91	5469.52	5525.09	6962.41	4836.18	7653.95	6778.05	6400.36
QLTFEEIAK	B2RZ37	26S proteasome non-ATPase regulatory subunit 13	1228.51	2446.19	1918.95	1735.92	2205.2	1207.53	2272.29	1321.51	2150.67	2223.91	1686.22	1943.06	1419.76	1678.64	1601.64	N/A
LNIGDLQATK	B2RZ78	26S proteasome non-ATPase regulatory subunit 13	7218.79	7764.18	6581.73	5107.42	6359.17	5501.79	6039.06	5282.04	3857.85	5866.12	5611.5	6407.65	5094.87	7016.42	6325.71	5642.42
FLGCVDIK	B3GNI6	26S proteasome non-ATPase regulatory subunit 13	4115.97	3553.3	4013.61	3074.72	N/A	N/A	3963.6	3336.36	3766	3154.34	3365.23	4650.74	2885.2	3560.58	3643.15	N/A
ELEEDFIR	B4F777	Coactosin-like protein	9143.32	7173.04	6208.41	4825.54	6557.63	6489.07	6255.11	7546.21	8829.22	5506.03	8143.36	6730.42	5609.15	5252.32	7898.92	7568.09
YISLDDLQQVK	B4F7E8	Glycerophosphocholine cholinephosphodiesterase ENPP6	664.724	2190.72	2092.08	2447.47	N/A	2056.43	1627.45	3154.74	1664.27	1761.76	2974.34	2346.18	1951.07	2108.93	N/A	N/A
AYDATCLVK	B5DEH2	S-formylglutathione hydrolase	17862.4	18075.2	16372.4	14323.3	14352.3	16412.1	14328.9	17472.5	18654.7	17143.1	18583.2	17982.6	15443.4	17035.6	19066	18603.2
KIPVVFR	B5DF89	S-formylglutathione hydrolase	15162.3	11130.8	11629.7	11999.6	10284.3	11432.1	9851.32	10668.7	22434.4	12260	10749.5	9289.59	12049.3	16167.1	14828.5	17181.1
SGCQQAASEHGLVVIAPDTSPR	B5DF91	S-formylglutathione hydrolase	9172.19	9476.85	7792.77	8268.44	8538.86	8141.79	7947.92	9953.58	9196.96	6736.38	8076.32	11264.7	8813.87	12533.8	9020.35	9168.27
FAIYLPPQAESAK	B5DFC8	S-formylglutathione hydrolase	24234.2	21674.5	17736.5	13008.2	19523.6	22541.4	16811	20888	25495.5	16096.5	20251.6	19636	14403.4	22541.4	25946.3	22456.4
MYSYVTEELPQLINANFPVDPQR	B5DFN2	S-formylglutathione hydrolase	1869.55	942.022	1852.12	486.76	N/A	N/A	1892.51	2790.98	1734.65	1038.87	1965.96	2944.04	2232.41	3607.9	N/A	1932.71
EFLSELQR	D2XV59	Septin-8	8602.9	8029.97	6975.21	5637.77	7735.62	9443.32	8054.9	8103.79	8309.03	6749.86	6795.68	9327.64	7538.65	9260.05	9158.28	7480.53
ELEEETNAFNCR	D3Z8L7	Septin-8	919.648	1131.68	1226.94	1350.11	909.436	587.18	952.637	994.351	1173.3	1041.06	724.395	446.388	1534.27	1201.23	N/A	1179.68
GNPSGIQPDLLISLTAPK	D3ZAA9	NAD(P)H-hydrate epimerase	7438.26	3356.63	4740.14	1385.22	4628.82	4961.55	3018.87	5595.87	5304.57	1861.45	6138.74	4226.68	3833.86	7886.15	18239.2	6218.5
ESISLSPEQLAQLR	D3ZAF6	Carbonic anhydrase 1	3896.71	2843.49	N/A	1247.31	3158.05	N/A	4178.12	5467.68	N/A	28367.3	3449.56	N/A	3019.07	3052.97	7189.53	3417.19
AMVNLQIQK	D3ZD32	CDGSH iron-sulfur domain-containing protein 1	5107.83	6208.71	8483.47	5312.04	6290.16	5322.42	4914.2	5840.27	N/A	4435.77	6879.74	6653.58	5145.13	8773.1	5268.67	5159.78
HNEETGDNVGPLIIK	D3ZDK7	CDGSH iron-sulfur domain-containing protein 1	13873.2	12557.2	13589.2	11209.8	12278.6	10520.8	14728.8	13727.8	11955	10061.2	12575.5	18851.9	11771.9	15360.7	15002.1	13651.9
VVHAFDMEDLGDK	D3ZFD0	CDGSH iron-sulfur domain-containing protein 1	N/A	2814.53	4294.7	3047.97	3474.85	4483.74	2515.02	N/A	2490	1622.65	7005.25	3065.6	1670.96	5024.98	N/A	2686.37
GIILVGNEEQK	D3ZHV2	Complex I assembly factor ACAD9, mitochondrial	12886.5	9779.58	9871.86	7917.53	9847.78	10966.1	10581	10209.7	10090.9	9270.76	9261.12	11975.5	8983.89	12299.8	11515	8758.62
FFNEEVDSR	D3ZLZ7	Complex I assembly factor ACAD9, mitochondrial	7156.74	4950.7	4811.96	4962.44	5029.28	4932.66	4212.45	6125	5467.11	4608.64	4934	6272.87	6089.82	4802.43	5103.15	4648.91
YAPENLDEQIK	D3ZPX4	Complex I assembly factor ACAD9, mitochondrial	4710.59	7139.47	6466.56	8836.6	5833.45	13173	11515	14005.8	4739.14	6408.49	5668.57	11235.2	7247.93	14263.9	8349.12	5899.86
VPVENVLGEVGGGFK	D3ZQG6	Complex I assembly factor ACAD9, mitochondrial	6028.84	2268.18	2350.87	1307.84	4281.44	5080.96	2540.69	2334.58	5996.03	1851.73	2440.05	2701.65	1762.61	5832.43	5090.26	2522.12
NLSEFGLIQEK	D3ZQL7	Complex I assembly factor ACAD9, mitochondrial	3798.54	3765.96	2216.28	2214.59	N/A	3911.65	2298.42	4119.83	N/A	2327.22	3365.77	3570.6	2626.17	3412.1	N/A	3465.7
LIEQTAEYACTR	D3ZRC4	Complex I assembly factor ACAD9, mitochondrial	4073.95	3014.25	2488.01	2997.45	1911.51	2619.1	3115.17	3481.66	4121.7	2820.79	2242.74	2176.73	2977.55	3171.34	2431.53	3192.87
LEENVHYFGR	D3ZS28	Complex I assembly factor ACAD9, mitochondrial	N/A	728.086	1220.78	1555.16	1566.33	1311.34	1829.08	1201.26	N/A	1234.83	1031.05	872.054	1405.42	799.657	451.952	1485.19
FTITPPTAQVVGVLK	D3ZTX0	F-actin-capping protein subunit alpha-1	4919.41	2059.33	3902.44	1820.03	3571.9	4274.11	3300.12	3271.63	5040	2657.24	4615.58	2713.25	3816.86	4465.91	8978.36	5452.88
DVQDSVTVSNEVQTAK	D3ZW55	F-actin-capping protein subunit alpha-1	3318.44	2115.34	2667.28	2538.13	2041.67	2370.27	2217.39	2072.26	2512.13	1723.3	2359.09	3223.35	2271.09	2655.14	2896.15	2562.99
FYTDPVEAVK	D3ZXK7	Succinyl-CoA:3-ketoacid coenzyme A transferase 1, mitochondrial	25537.1	21645.2	18348.9	13588.4	20951.7	21372.1	20150.1	20401.8	19024.5	17336.9	22266.7	19881.7	15900.2	21131.9	22353	24803.9
CTLPLTGK	D4A631	Succinyl-CoA:3-ketoacid coenzyme A transferase 1, mitochondrial	9895.72	10199.4	8384.49	5670.63	9907.35	12321.8	8770.11	7083.96	7889.65	7121.37	8269.82	8269.41	8003.88	8276.09	8609.87	8947.47
AGGAGVPAFYTSTGYGTLVQEGGSPIK	D4ABY2	Succinyl-CoA:3-ketoacid coenzyme A transferase 1, mitochondrial	7745.21	7126.01	7674.01	3173.48	9372.81	11436.7	6482.24	6623.08	5657.99	5244.14	9394.71	4961.46	5388.49	6659.55	17259.5	7833.49
MISSYVGENAEFER	E9PSK7	Succinyl-CoA:3-ketoacid coenzyme A transferase 1, mitochondrial	10291.5	8798.42	9293.76	7116.78	7162.39	8435.16	6167.2	11264.5	5015.59	5456.47	8485.41	6271.2	7010.61	10028.6	6659.31	7839.47
LGVPLPER	E9PU28	Phosphatidylserine synthase 2	13622.1	10003.7	9534.76	8311.93	11401.2	10953.3	9433.58	10020.5	10826.3	6481	11583.1	11981	9568.93	11542.6	12497.2	9659.88
VAGGSGSESPLLEGR	F1LMZ8	Phosphatidylserine synthase 2	2451.58	3122.79	1877.21	2207.45	2086.44	1712.09	2140.64	2846.25	1937.32	1934.41	2168.49	2381.29	2401.29	2046.39	1531.34	1593.04
VTDTDFDGVEVR	F1LNJ2	Neutral cholesterol ester hydrolase 1	4949.61	4371.36	3861.21	3280.59	4413.76	4498.22	3541.3	3632.27	3962.99	3392.22	3884.35	4543.73	3399.14	3638.18	4989.61	4532.54
LLTSGYLQR	F1LP90	Ubiquitin thioesterase OTUB1	19593.5	16950.8	16561.4	14091	14599.2	15729.3	16473.7	11668.1	15778.1	14088.8	13498.8	15037.5	12705.9	15760.2	14871.8	17781.9
IQQEIAVQNPLVSER	F1LQ48	Ubiquitin thioesterase OTUB1	7350.12	2686.5	2641.01	1563.98	2552.11	2333.59	2635.6	3370.72	5193.33	1494.12	1929.7	3180.84	2071.7	4247.37	5106.46	4941.64
GEGGTTNPHVFPEGSEPK	F1LQX4	Ubiquitin thioesterase OTUB1	680.909	817.337	822.284	1025.81	614.854	414.653	1720.94	N/A	967.728	963.156	1232.74	728.921	1065.26	713.7	1215.29	1281.24
FSSSIVGPYDSIILPPESK	F1LU71	Fumarylacetoacetate hydrolase domain-containing protein 2	5471.82	1826.07	2262.52	770.25	3215.3	2941.23	1906.99	N/A	5329.56	1430.27	2600.99	3023	2608.33	5398.76	N/A	4409.92
ALAAQLPLIPR	F1M3G7	Fumarylacetoacetate hydrolase domain-containing protein 2	7004.61	6955.37	5699.08	3161.79	7027.35	9636	5364.87	6141.89	7901.74	4292.41	7815.98	6610.41	5319.01	8153.82	10936.6	7836.6
ATVNLLGDEK	F1M4A4	Receptor expression-enhancing protein 5	9293.73	8706.11	7694.78	6334.86	5862.54	7664.59	8749.25	7619.17	7414.76	6556.26	5963.14	8424.84	7791.28	8102.99	9010.9	8042.52
VVTVGQFK	F1MA98	Vacuolar protein sorting-associated protein 29	6567.91	10137.8	8991.94	6575.12	9384.98	9245.46	8875.35	7419.01	8987.43	7181.86	9005.02	11685.5	5986.75	9911.91	9451.41	7393.2
TLAGDVHIVR	F1MAB7	Vacuolar protein sorting-associated protein 29	4219.22	2068.5	2012.9	2581.58	2974.91	2903.92	3174.81	3274.12	3639.39	1672.48	2537.95	3124.34	1899	3711.46	3299.45	3550.44
GDFDESLNYPEQK	G3V6S8	Vacuolar protein sorting-associated protein 29	3299.29	2885.23	2646.11	2313.38	2772.76	2666.37	3129.01	3767.23	2587.18	2425.67	2542.89	3274.57	2682.39	N/A	4396.62	4795.89
ELEEEVSNFQK	G3V7P1	Septin-11	11896.9	13377.1	11850.8	10007.9	13057	13896.1	10524.6	12841.1	11246.4	12275.4	10727.1	13128.1	10334.7	11574.1	11240.8	11384
SYELQESNVR	G3V928	Septin-11	6252.18	5169.04	4583.7	3302.28	6057.23	5703	4851.89	4451.04	2859.18	5254.35	4998.8	4904.42	4685.13	6007.14	6451.54	5292.86
RNEFLGELQK	G3V9R8	Septin-11	16484.4	11961.5	13392	8423.12	9246.39	28989.5	11923.7	10812.8	N/A	8611.3	11820.4	18559.5	10446.7	29214.7	10940.5	13035.4
AAAQLLQSQAQQSGAQQTK	M0R4F8	Septin-11	4846.5	4490.79	4450.31	3461.56	4481.77	4273.86	4503.82	5204.94	5960.27	3512.92	3630.01	6195.18	5137.07	6468.61	7121.3	5223.8
DTDPDSKPFSLQETYEAK	M0RC99	Septin-11	6093.92	4831.46	5414.8	5253.33	6166.45	5351.17	6540.82	5485.1	4416.28	4871.34	5936.51	6537.07	5546.69	4984.42	6675.21	7605.04
STLMDTLFNTK	O08557	Septin-11	1644.06	2777.31	3604.73	1324.16	4009.81	3548.77	1579.01	3050.94	N/A	1504.59	4850.86	2621.47	1440.76	4613.62	1990.1	2904.16
LTIVDTVGFGDQINK	O08618	Septin-11	2639.26	2726.53	1817.31	1669.28	2354.78	N/A	3347.78	2722.87	N/A	2420.16	2019.54	3073.14	2756.42	1291.04	N/A	2980.45
IIEAPISK	O08629	High mobility group nucleosome-binding domain-containing protein 5	16198.5	10829.2	7460.93	9563.52	11944.1	13478	10675.5	14382.2	12879.4	8251.43	12180.5	13117.4	10587.3	7662.02	11716.5	12476.3
DAGATTIPETKPEVVK	O08651	High mobility group nucleosome-binding domain-containing protein 5	12771.9	5253.72	4456.63	4364.4	12146.2	12851.3	8131.04	6359.19	18413.6	4448.71	6615.96	11784.9	5114.48	8873.75	10393.9	11879.8
VEGPAFTDAIR	O08662	Protein Niban 2	3982	2642.95	2975.88	2405.13	3099.29	3241.38	4213.92	3685.88	3225.58	3226.54	2003.32	N/A	2672.91	2902.33	3268.39	2639.88
SVQTTLQTDEVK	O08730	Erlin-2	5066.31	5763.4	5169.71	4056.99	5477.71	5640.16	4578.23	6356.29	6611.96	4160.87	4874.74	6447.36	4786.46	6527	5583.05	5007.25
VTKPNIPEAIR	O08815	Erlin-2	3403.38	3527.37	2910.73	3009.98	4068.86	3238.75	3806.89	4072	3256.7	3259.53	3267.04	6113.53	3351.9	2572.84	2790.65	5084.74
VAQVAEITYGQK	O08816	Erlin-2	7649.37	7371.64	7325.37	6832.36	7198.48	7345.23	7138.65	7642.89	7889.72	6495.53	7675.2	7100.27	6813.56	7659.55	8278	6697.09
ISEIEDAAFLAR	O08837	Erlin-2	7267.05	6274.48	3603.75	3100.83	5423.73	6145.54	3765.9	5015.9	5732.78	3658.82	5839.33	7836.81	4214.55	5615.7	5747.26	4712.18
LGFGLEDEPLETATK	O08838	Erlin-2	2421.83	2749.54	3238.01	1780.14	3956.64	3404.08	2437.47	3721.68	2585.08	1970.86	3945.73	4143.47	3020.45	2855.92	6502.43	3049.82
IEEGHIGVYYR	O08839	Erlin-2	4573.62	2969.61	3124.49	3100.46	3154.28	2228.62	3931.69	3238.53	4103.93	2995.81	3421.29	2609.32	3005.94	3145.58	2626.86	3069.05
FLQESFNNDR	O08873	Cullin-3	5114.68	5024.09	4405.87	4541.17	6442.69	5900.25	4773.49	4616.27	3389.99	4711.91	4650.8	5161.9	4744.47	4308.78	6537.39	4856.05
SPEYLSLFIDDK	O08875	Cullin-3	2018.85	2102.29	1821.45	1102.94	2209.81	879.036	1360.81	2000.43	N/A	1764.98	1627.06	2654.51	1139.55	1677.55	2315	2204.45
EDGSEVGVGGAQVTGSNTR	O09175	Cullin-3	2326.85	796.637	892.476	781.818	N/A	N/A	1242.45	1426.36	1444.04	919.617	N/A	1325.35	1788.39	1912.31	2447.92	950.571
EVVTEHLINK	O35052	Cullin-3	2001.49	1308.74	478.53	618.203	494.18	N/A	946.457	1002.61	1160.37	1382.1	793.388	N/A	1367.99	1245.02	827.159	1287.28
GLTEQEVETILDK	O35095	Cullin-3	1583.29	2470.79	2750.08	1928.5	2526.32	2786.59	2228.84	2505.82	3576.06	2305.44	853.732	3111.15	2344.28	3553.03	5602.01	2834.08
VLVDQTTGLSR	O35112	ELAV-like protein 1	16906	17345.3	8888.88	13396.2	15880.2	15913.6	12299	16711.8	19318.6	10567.3	18168.4	18965	11316.3	13647	14058.1	13207.2
ILQVSFK	O35142	ELAV-like protein 1	9004.66	8870.73	6137.46	8363.49	8925.51	10572.7	6689.87	8048.36	11185.6	5598.17	10373	8061.48	5939.74	7420.19	6419.81	6940.53
SLFSSIGEVESAK	O35179	ELAV-like protein 1	13316	12586	8149.58	8069.89	10028.7	14713.3	9359.94	12640.9	18233.9	7220.67	14507.1	13630.6	10514	15272.3	16648.6	11589.1
DANLYISGLPR	O35244	ELAV-like protein 1	11910.9	9104.62	5494.11	5661.58	9301.12	11019.2	5776.98	8685.22	14053.3	5263.18	12866.5	8906.65	6585.8	9899.11	8229.76	8395.07
GCILTLVER	O35263	Eukaryotic translation initiation factor 3 subunit C	8819.53	4775.35	6829.89	5359.88	6263.67	6513.57	6775.77	7663.47	7134.2	5592.42	6742.64	6488.48	6996.2	12104.7	8482.97	7349.62
LNEILQVR	O35264	Eukaryotic translation initiation factor 3 subunit C	1934.82	2946.71	2352.08	2772.53	2768.39	1528.2	3750.17	2830.78	2533.78	2863.05	2164.19	2778.51	2841.1	N/A	2827.79	1967.95
ELLGQGLLLR	O35303	Eukaryotic translation initiation factor 3 subunit C	N/A	2445.02	2281.84	1072.48	N/A	3907.52	2288.77	2512.67	4059.99	1927.38	2775.25	2609.85	1992.91	4630.15	4568.55	3676.64
DAHNALLDIQSSGR	O35331	Eukaryotic translation initiation factor 3 subunit C	5457.04	5397.55	5216.57	4707.9	5510.06	6048.88	5608.66	6004.38	6353.08	2517.35	6060.24	6224.04	2856.76	6508.32	6527.39	6229.11
GTTEEICQIYLR	O35458	Eukaryotic translation initiation factor 3 subunit C	6165.65	5186.29	4334.61	3680.18	4374.9	4202.2	5201.73	5117.39	2758.58	3877.27	3598.15	4741.43	4205.1	3563.42	5053.21	4307.45
VVLLAEGR	O35476	S-adenosylhomocysteine hydrolase-like protein 1	37645.8	32021.2	34187.6	25412.7	33732.6	37007.8	36700.2	29352.9	33197	25353.8	31045.8	41363.7	26045.7	40843.7	36191.7	32441.6
QVVVCGYGEVGK	O35509	S-adenosylhomocysteine hydrolase-like protein 1	9818.99	10408.3	9525.36	8242.4	11060.6	9299.05	9484.54	8208.62	10343.5	9620.96	8139.69	8549.7	9355.47	9372.78	8981.78	8432.69
GIVEESVTGVHR	O35550	S-adenosylhomocysteine hydrolase-like protein 1	18287.6	15738.6	15501.1	12112.3	15841.6	20258.6	16234.9	16276.5	21952	12126.7	16366.7	18640.7	13481.1	18598	16123.5	15972.8
FDNLYCCR	O35567	S-adenosylhomocysteine hydrolase-like protein 1	11734	11218.2	8382.73	7986.34	8584.3	9843.94	10030.9	7399.01	9783.29	10318	9430.48	9043.2	10100.3	9156.88	9868.02	10967
QDVYLLPK	O35763	S-adenosylhomocysteine hydrolase-like protein 1	1433.17	2274.33	2293.35	1997.75	2076.54	1885.41	2072.72	1069.49	2543.29	2914.91	2757.43	N/A	1795.74	1964.67	2138.76	1797.43
TPELTWER	O35814	S-adenosylhomocysteine hydrolase-like protein 1	5113.18	4097.93	6646.78	6297.62	N/A	7126.77	8693.74	6329.36	6485.2	11475.6	N/A	4217.48	7891.66	3950.9	3020.5	5213.53
YKQDVYLLPK	O35821	S-adenosylhomocysteine hydrolase-like protein 1	4904.92	4351.91	4132.01	2531.98	3022.69	2766.87	4843.72	2177.9	4117.15	2578.78	4060.6	N/A	3393.6	3421.14	3457.65	3259.77
LCVPAMNVNDSVTK	O35824	S-adenosylhomocysteine hydrolase-like protein 1	6084.47	5123.37	7943.09	3026.37	6860.11	6710.8	3758.5	8692.46	3844.43	2310.26	7934.77	6551.78	5867.98	12764.4	7886.52	5132.23
VGDNDFLEVR	O35889	GTP-binding protein 1	2368.56	2242.93	2229.62	2769.2	2524.9	2047.48	2260.36	2624.93	2025.61	2246.23	3837.34	2269.44	2878.7	2322.63	2757.29	1980.43
KIPVLVQSK	O35910	GTP-binding protein 1	N/A	11045.4	10019.3	7689.84	10830.2	11886.1	N/A	13617.9	11116.5	10680.5	8931.54	N/A	8558.53	13562.5	13211.2	11836.4
LVLVSPTSEQYDSLLR	O35952	GTP-binding protein 1	19476.8	8857.37	10447.7	6300.62	14407.5	12534.6	10323.8	15017.4	16409.1	6672.49	13399.6	13182.2	11091.1	16178.5	32453.8	15596.7
DDVIVTASNFSSER	O35964	GTP-binding protein 1	6834.39	5211.71	4627.83	3644.32	6263.7	5445.71	3704.16	5209.62	4467.74	3837.64	5061.98	5061.84	5627.3	4677.82	7320.9	6581.89
LVVVGGGGVGK	O35987	Ras-related protein R-Ras	7261.86	4552.25	6337.19	3924.57	5080.3	6612.14	6999.92	5759.38	5020.99	5083.01	5665.62	7210.99	5090.55	7454.67	6424.29	5877.04
VEGGELVIAR	O54715	MAGUK p55 subfamily member 2	40786.7	38513.8	32142.4	26462.4	33990	39081.5	34937.6	31899.5	35218.9	31481.9	30884.5	41968.4	32703.3	36292	35840.2	36055.2
ALQELLR	O54783	MAGUK p55 subfamily member 2	23889	17461.6	20008	13976.9	18060.7	19763.4	18202.5	17617.1	18657	14601.9	18037.6	20634.1	16148.5	22617.1	23436.5	17901.7
VCVLDVNPQAVK	O54861	MAGUK p55 subfamily member 2	34965.7	27593.5	25986.3	18763.3	30318.1	30278.4	25597.9	26216.2	28678.7	18979.3	24802.5	33554.2	24246.6	27912.1	31899.3	30237.1
YGTTVPYTSR	O54975	MAGUK p55 subfamily member 2	19784.2	13700.9	15037.5	12953.5	19575.9	17064.5	15985.3	18793.5	16866.5	13689	17696.4	13247.8	14790.2	19410.1	18234.9	17299
EGQGYSFVSR	O55012	MAGUK p55 subfamily member 2	15039	14230	12680.5	10963.9	13360.9	13344.7	12581	14676.8	14757.7	18873.9	12989.4	12869.2	13346.3	12292.8	15974.2	15036
TAGEHLGVTFR	O55096	MAGUK p55 subfamily member 2	2831.57	3092.49	2456.83	2844.42	2270.4	2922.95	3109.96	2686.57	2113.85	3170.05	N/A	2999.46	2325.78	2980.53	2322.35	2716.02
DLAELAEQSSTAAELAR	O55156	MAGUK p55 subfamily member 2	17852.9	4704	3299.52	2006.66	6315.8	6512.56	3704.05	5127.15	16956.9	2962.91	3763.14	4941.76	8192.52	10993.5	24512.6	11373
LEETKLEAVR	O55171	MAGUK p55 subfamily member 2	10236.7	7074.86	6597.65	4094.71	8013	8239.65	10084.8	7533.44	9081.74	3756.92	9167.69	9117.42	9034.14	11222.3	11106	9707.59
DNNLELVQEILR	O70196	MAGUK p55 subfamily member 2	20911.2	5059.58	14000	4279.03	16870.2	25083.1	11398.2	16051.2	17509.8	6281.29	18519.1	18247.9	12405.8	23180.9	69714.9	17019.2
TLVLIGAQGVGR	O70199	MAGUK p55 subfamily member 2	30277.9	22057.7	25408.8	15822.9	22862.3	26495.9	24104.5	18359.5	27836.9	21570.2	24544.1	18502.4	19078.2	25295.7	18017.9	21487.2
GIMESPIVR	O70276	MAGUK p55 subfamily member 2	11449.9	9431.7	13034.9	10882.4	12993.2	14792.4	6416.37	13828.2	6908.33	8454.53	16135.6	11724.6	8287.05	14909.9	8770.81	8349.98
DLELTPTSGTLCGSLSGK	O70277	MAGUK p55 subfamily member 2	12352.4	7735.39	6183.27	3734.68	8130.91	10506.9	6916.97	9293.66	8989.4	5292.46	7935.94	9895.75	7396.73	10195.1	21831.9	10434.2
YLEHGEYEGNLYGTR	O70351	MAGUK p55 subfamily member 2	6856.2	5402.34	6282.38	6384.97	5527.94	6206.4	6352.52	4843.83	6942.29	6476.95	5583.33	5982.77	6766.68	6073.37	6873	7205.59
ILPSYQEPHLPR	O70511	MAGUK p55 subfamily member 2	8723.01	8365.75	6583.82	6951.53	6135.13	7373.89	9936.6	6526.67	9512.91	8617.03	5849.29	5742.68	7702.49	4588.83	5499.76	7586.8
DFTPSGIAGAFR	O70617	ATP synthase subunit f, mitochondrial	56310.4	37007.5	26026.8	13954.3	38209.9	41180.5	29963.4	42437.4	58484.6	16151	43309.5	46126.6	27444.4	36892.8	68787.9	44534.7
VGGNIEVLGFNAR	O88279	Chromodomain-helicase-DNA-binding protein 5	8500.79	7498.28	8859.29	6682.69	10113.6	10508.3	10087.5	11422.3	10485	6504.73	10414.2	12296.3	8887.69	9386.42	14541.1	10723
ENEFSFEDNAIR	O88339	Chromodomain-helicase-DNA-binding protein 5	2544.07	3363.87	3859.96	4047.41	3968.74	3923.95	3486.14	4187	N/A	3981.09	3908.03	4689.93	4085.89	3875.57	6496.74	3814.89
GETAVPGAPETLR	O88453	Glycerol-3-phosphate phosphatase	8884.72	9296.26	9530.12	7734.77	8784.88	7529.43	7293.46	8234.67	7594.77	9383.95	9389.38	9840.59	7744.65	8062.31	9558.97	12171.1
VLAISPEEQK	O88506	Unconventional myosin-XVIIIa	N/A	2506.41	2273.95	2942.55	3496.6	2069.43	3307.28	2528.98	1373	3023.83	2138.98	2781.07	2674.16	N/A	2795.54	2489.67
VQPIPELSELSR	O88588	Unconventional myosin-XVIIIa	N/A	1702.02	1274.32	1067.37	1641.52	1666.28	1728.47	N/A	2168.29	1562.96	N/A	2385.92	1861.18	1165.95	1677.9	1288.37
GVLVEEINTK	O88600	Microtubule-actin cross-linking factor 1	4184.16	2186.38	4039.68	3406.69	4967.77	3237.95	4208.57	3446.25	4340.79	3076.81	3628.96	4711.43	4936.89	5109.32	5302.75	3858.06
EQVDPLQVK	O88658	Microtubule-actin cross-linking factor 1	3886.99	3212.2	2829.15	3463.49	3388.62	N/A	3483.31	3846.15	3118.05	3361.83	2863.16	3277.55	3461.63	4057.11	3280.62	3244.99
VYISELK	O88761	Microtubule-actin cross-linking factor 1	2066.02	1899.08	1938.14	3097.5	2708.13	2191.27	3194.89	2107.94	N/A	2392.1	2400.39	2288.1	2647.99	1776.07	2981.59	2526.84
LDNLLGEVR	O88767	Microtubule-actin cross-linking factor 1	7670.92	5601.64	5241.08	4565.73	3958.94	N/A	5201.35	N/A	5764.35	4589.61	4999.45	N/A	5614.07	4774.07	7159	N/A
LSGQSAISTQPDAVK	O88775	Microtubule-actin cross-linking factor 1	538.443	1055.52	1914.52	1705.77	1885.5	1146.27	1022.42	2372.31	480.883	1440.98	1011.71	N/A	1871.53	2376.45	1645.79	1684.05
VDEIDAAIQR	O88788	Microtubule-actin cross-linking factor 1	3719.91	3980.3	3533.68	3427.51	3761.33	3793.39	3441.42	3421.83	3227.68	3902.28	3901.35	4022.47	3285.98	2344.08	N/A	4047.37
ITGQLESLECR	O88794	Microtubule-actin cross-linking factor 1	1018.23	1460.3	1301.37	2403.52	1636.26	2276.03	1630.86	1877.73	1164.14	2327.65	1547.33	1933.36	1884.9	1716.95	N/A	N/A
LVGIVTSR	O88808	Inosine-5'-monophosphate dehydrogenase 1	194862	135640	177629	135112	172313	207712	143738	153316	160810	123976	177722	180241	145814	193119	164693	156990
QLLCGAAVGTR	O88871	Inosine-5'-monophosphate dehydrogenase 1	96170.8	87812.4	80308.6	61449.1	76270.4	84112.8	73430.4	84182.4	80107.3	83588.4	63863.7	77390.9	70571.1	79869.3	79815.7	73257.5
LPIVNDQDELVAIIAR	O88941	Inosine-5'-monophosphate dehydrogenase 1	15374.4	11586.6	13223.5	3704.71	16521.2	23485.5	11580	12650.9	12327.8	7471.66	20605.8	16038.4	9495.93	14908.8	21356.3	14132.6
IAQGVSGSIQDK	O88984	Inosine-5'-monophosphate dehydrogenase 1	40308.4	38564.1	775.847	759.132	2397.81	4125.94	3424.74	5456.3	31975.1	3319.43	1800.6	4807.7	1114.97	4038.82	N/A	2353.42
FEQGFITDPVVLSPSHTVGDVLEAK	O88989	Inosine-5'-monophosphate dehydrogenase 1	6727.53	4238.5	4393.9	1997.81	4714.43	5561.71	3283.79	5680.14	4062.4	2896.33	4599.34	6184.12	4406.06	5391.62	N/A	6057.76
NLIDAGVDGLR	O89046	Inosine-5'-monophosphate dehydrogenase 1	198842	126355	126640	83683.1	137517	163780	114606	111384	139501	112357	114155	143006	105663	160262	183751	140999
IELVVAPAGVTLK	O89049	Inosine-5'-monophosphate dehydrogenase 1	157932	83525.9	97440.1	39656.5	129234	194473	76949.1	87340.3	95910.8	54754	164313	96840.2	53537.7	126164	224621	121508
DIDFLAEK	P00388	Inosine-5'-monophosphate dehydrogenase 1	91424.5	60321.2	58570	34895	78388.6	71119.4	56251.6	57322.5	68796.3	42124.9	73780.8	78009.1	52664.2	67815.6	81721.5	73582
FGVPVIADGGIQTVGHVVK	P00406	Inosine-5'-monophosphate dehydrogenase 1	10882.4	8564.32	11283.7	2962.39	9398.98	11527	9294.37	8835.18	10632.6	6310.46	13833.2	7746.75	9006.29	11750.1	10478.2	13426.6
YPHLQVIGGNVVTAAQAK	P00507	Inosine-5'-monophosphate dehydrogenase 1	12305	15678.9	22028.4	17044.8	13134.5	15879.6	24092.2	12941.9	25623.8	16592.7	20452.5	11333.3	21414	26772.9	20446.6	24926.5
DHTTLLSEVMTPR	P00762	Inosine-5'-monophosphate dehydrogenase 1	38824.4	11637.2	49325.5	10262.4	48212.8	56123.8	30370	46310.2	15891.2	11278.3	31692.4	45801.6	12849.6	67826	57607.1	47541.7
IQHGFSGIPITATGTMGSK	P00787	Inosine-5'-monophosphate dehydrogenase 1	9009.39	10012.5	34534.5	14444.9	30721.7	29732.8	8818.53	24932.5	9310.61	10898.8	32378.1	20739.4	13179.9	37916	24975.3	27422.5
GKLPIVNDQDELVAIIAR	P01026	Inosine-5'-monophosphate dehydrogenase 1	19203.7	14497.2	14120.7	9485.92	16832.9	18310.1	15150.6	18825.4	25057.2	10715.4	14653.5	19145.6	12614.6	18415.3	6075.46	18328.8
GPIDAITGEAR	P01041	Plexin-A3	2853.29	3008.4	3807.14	3515.31	4088.6	2639.76	4399.62	3749.74	3575.82	3346.92	3475.26	3119.24	3978.46	2258.59	4447.31	3580.02
GEFTNLQGVAASTSGK	P01830	Tripartite motif-containing protein 2	2101.25	2598.62	2514.4	2179.23	1888.28	2495.61	2539.28	2215.14	2835.02	2216.29	2186.02	1993.68	2644.34	2449.91	N/A	1054.39
VDLVDESGYVPGYK	P01946	Tubulin polymerization-promoting protein	10554.5	8109.82	10102.4	4565.43	10786.4	8103.51	6346.71	5961.01	8642.56	4851.63	8247.69	7600.92	5696.44	7853.75	13236.6	8843.59
NVTVTDVDIVFSK	P02091	Tubulin polymerization-promoting protein	2139.85	2475.65	1993.63	1410.02	1730.75	N/A	2195.62	1745.74	N/A	1465.35	1786.1	1852.21	1432.65	1741.13	N/A	1780.32
VAAVSTIVNR	P02523	Calcium-independent phospholipase A2-gamma	N/A	2813.15	2952.57	2873.15	3087.04	3974.73	3134.47	2934.2	N/A	3011.03	3309.51	2506.87	2785.57	N/A	3089.08	2946.5
VIEVVIR	P02524	Retinoblastoma-like protein 1	N/A	4261.29	3719.02	3800.28	6794.92	8246.73	4010.1	5300.66	6780.08	2830.32	6613.09	6494.46	4992.17	6627.12	3960.8	5129.42
SVIDYQTHFR	P02529	Transmembrane emp24 domain-containing protein 7	2142.69	1796.12	1406.91	1802.96	1262.59	1463.64	2320.71	1882.04	1892.97	1802.18	1616.96	1253.24	1862.34	1250.91	1224.77	1390.79
IVFVTGNAK	P02650	Inosine triphosphate pyrophosphatase	9031.23	8005.45	6809.39	8135.12	7041.15	6597.63	6478.44	6956.09	9528.46	7133.69	5971.35	7955.37	6480.08	5622.31	N/A	7202.98
LAAILAK	P02696	E3 ubiquitin-protein ligase RNF123	2012.56	1371.11	1748.09	1545.64	2128.7	1908.03	2126.8	1609.13	2284.19	1271.31	1834.53	2371.19	2110.33	3475.46	2826.37	1793.05
DFVSALR	P02770	Brefeldin A-inhibited guanine nucleotide-exchange protein 1	1074.2	1120.69	N/A	1058.39	1603.12	868.214	1866.75	1140.68	N/A	1241.34	1792.58	1422.55	2043.48	1394.88	N/A	1156.54
IFNETPINPR	P03889	Coatomer subunit gamma-2	6279.99	6465.64	6996.2	5691.79	5642.12	5791.04	6096.17	8743.35	4054.1	5251.16	5354.11	7202.84	5785.78	5905.77	6217.55	5410.78
SEITLVTPKPEK	P04177	Coatomer subunit gamma-2	1789.28	1902.23	2520.71	1227.17	2484.5	N/A	2211.41	1518.75	N/A	1395.86	2341.08	1802.49	1364.44	N/A	2544.95	2130.12
VSGLAGSIYR	P04182	C-Jun-amino-terminal kinase-interacting protein 3	2513.16	2905.89	3507.88	2602.92	3779.46	2910.59	3316.07	2172.57	2249.25	2792.95	1876.12	1350	3371.25	2271.75	3310.84	3594.78
LVGIISSR	P04256	Inosine-5'-monophosphate dehydrogenase 2	194485	8269.93	8199.95	8187.81	178088	10142.3	8846.7	8628.57	9597.12	9267.42	9913.39	9788.4	8151.54	192973	165278	156834
NLIDAGVDALR	P04636	Inosine-5'-monophosphate dehydrogenase 2	6597.83	4478.09	4002.51	2917.38	4454.96	5571.65	3632.76	4340.51	4616.85	3894.21	4212.95	6674.59	3708.91	4124.12	6259.03	4648.52
REDLVVAPAGVTLK	P04642	Inosine-5'-monophosphate dehydrogenase 2	2152.14	2534.83	2196.1	2062.75	2259.56	1649.1	1683.54	2126.57	2194.78	2745.98	2130.81	2370.25	2094.65	2051.05	1975.69	1582.56
TGQAAELGGLLK	P04644	26S proteasome non-ATPase regulatory subunit 11	4571.82	4529.61	4452.35	3082.18	3840.63	4180.52	3129.48	3868.18	4305.64	4197.28	3414.35	5128.72	4505.3	5117.73	7093.85	4199.26
EQSILELGSLLAK	P04646	26S proteasome non-ATPase regulatory subunit 11	4764.48	3737.05	4169.63	1305.97	4795.34	5575.03	3334.8	4501.52	4826.84	2159.46	5250.94	5333.25	2893.7	7569.37	13434	4843.16
IVALSSSLSNAK	P04762	U5 small nuclear ribonucleoprotein 200 kDa helicase	8460.79	7224.66	7444.43	10401.5	10296.8	12175.9	7983.08	8185.98	11175.8	7305.26	9336.21	10102.6	8125.78	8098.76	8536.78	9281.23
GNIIISTPEK	P04764	U5 small nuclear ribonucleoprotein 200 kDa helicase	6763.75	5795.51	5623.34	8165.07	8532.33	9327.74	5992.03	8759.1	10440.7	5953.82	10437.5	10530.8	7261.68	7865.84	6983.79	6242.63
TGNFQVTELGR	P04785	U5 small nuclear ribonucleoprotein 200 kDa helicase	6590.95	8363.34	4982.71	7393.14	6776.53	9740.94	5080.9	9737.38	9140.07	6228.6	10345	10333.3	8127.92	7313.71	6384.8	6901.58
GPVLEALVAR	P04797	U5 small nuclear ribonucleoprotein 200 kDa helicase	4257.99	5187.41	2535.6	4976.05	5753.47	7461.71	4436.05	6458.37	6978.57	4345.81	5381.73	7047.33	5053.18	6967.34	5098.05	4820.31
EEEVTGPVIAPLFPQK	P04897	U5 small nuclear ribonucleoprotein 200 kDa helicase	5644.96	3305.41	2075.24	1857.56	3560.59	7077.42	2067.83	4965.66	8978.78	1989.42	4193.93	5020.66	3516.19	5508.68	7544.85	3928.37
YAQAGFEGFK	P04905	U5 small nuclear ribonucleoprotein 200 kDa helicase	3069.7	2950.83	1810.92	5111.36	3680.56	4722.64	2064.2	3196.71	4076.83	3827.98	4959.5	3904.96	3778.36	2904.59	3112.29	3251.76
SNSLISIK	P04906	U5 small nuclear ribonucleoprotein 200 kDa helicase	6222.83	5490.15	4148.05	6196.49	7339.64	8787.04	4136.02	7696.63	7865.9	4532.71	8488.19	7500.74	6116.69	5170.68	6029.67	4791.53
FYDDAIVSQK	P05065	U5 small nuclear ribonucleoprotein 200 kDa helicase	3342.78	3586.39	2252.58	4501.02	3195.35	3404.89	2526.04	4311.91	5282.15	2754.06	4674.41	4307.78	3699.96	2148.49	4065.84	3450.9
NSAFESLYQDK	P05197	U5 small nuclear ribonucleoprotein 200 kDa helicase	4171.19	4662.84	3415.65	4674.46	5575.2	6134.52	3203.99	5342.19	7156.95	5037.98	5566.41	4928.56	4699.98	2724.25	3057.01	3050.09
VFSLSSEFK	P05369	U5 small nuclear ribonucleoprotein 200 kDa helicase	4055.93	2689	2421.1	4822.04	5121	5538.29	3339.87	4330.51	N/A	3055.18	4533.6	5525.96	3717.69	N/A	4856.62	3816.2
CQLPDGSFR	P05370	U5 small nuclear ribonucleoprotein 200 kDa helicase	2972.48	3258.12	2284.02	3901.64	2727.69	2994.59	2484.62	3713.85	2700.21	2677.29	4326.93	N/A	3351.63	N/A	2627.91	1647.54
NALLQLTDSQIADVAR	P05426	U5 small nuclear ribonucleoprotein 200 kDa helicase	2653.91	1276.71	549.636	678.578	1141.63	N/A	1023.25	2025.72	4221.38	508.317	1631.25	2290.14	1325.82	2102.06	3854.25	1932.62
DTLGLFLR	P05506	U5 small nuclear ribonucleoprotein 200 kDa helicase	6798.72	3223.62	2733.3	1515.93	5245.62	7139.98	2044.79	5216.87	6820.81	1488.7	7113.28	6040.57	3302.52	5281.15	9834.4	3521.93
YPPPTELLDLQPLPVSALR	P05508	U5 small nuclear ribonucleoprotein 200 kDa helicase	9107.58	3509.13	5970.56	2221.55	11680.6	25099.3	5263.77	9307.13	11301.2	3671.57	16027.7	10089.8	8397.83	9994.43	17880.4	9756.41
VVLLTGETSTDLK	P05544	U5 small nuclear ribonucleoprotein 200 kDa helicase	3102.26	7140.9	3950.4	5022.51	4535.31	6187.48	2917.1	5960.25	5931.03	5425.11	6291.37	7736.34	4218.41	4713.17	4535.63	3669.94
SGGPVVVLVQLER	P05696	U5 small nuclear ribonucleoprotein 200 kDa helicase	3551.32	3076.88	1596.38	2409.09	3620.74	3872.56	2067.01	4419.17	3822.62	2207.79	4046.37	3606.5	2569.64	3309.91	N/A	2757.14
DLIPYLEK	P05708	U5 small nuclear ribonucleoprotein 200 kDa helicase	3149.17	N/A	1578.05	1662.46	3270.22	2974.16	N/A	3186.54	2323.94	1475.15	3426.92	2248.86	1595.63	N/A	3260.36	N/A
ALFLIPR	P05712	Misshapen-like kinase 1	3029.6	56609	70418	1438.94	79094.8	73029	66489.9	1827.23	97460.6	48212.6	2494.62	65863	59348.9	2089.27	81533.3	70715.3
GQNVLLTENAEVK	P06214	Misshapen-like kinase 1	881.429	1742.67	2067.76	1653.06	1412.58	1712.5	1190.97	1779.87	N/A	1593.98	1347.72	1510.23	1337.19	1339.64	N/A	867.512
NPNGPYPYTLK	P06238	Heterogeneous nuclear ribonucleoprotein L	10724.5	12056.3	4057.96	9763.66	13050.4	13623.7	4084.06	10824.2	11082.5	9975.63	9705.64	8339.55	8313.96	6916.68	8715.85	9123.53
LCFSTAQHAS	P06685	Heterogeneous nuclear ribonucleoprotein L	7366.62	6460.57	3783.08	6949.19	7493.94	11167.1	3400.81	8572.92	10738.3	4533.23	8144.39	8382.55	5743.18	6215.47	6095.94	6408.44
TPASPVVHIR	P06686	Heterogeneous nuclear ribonucleoprotein L	12918.7	12980.4	6877.12	12692.7	11713.5	19152.6	6729.31	12830.3	14347.5	10579	13602.1	16123.5	11832.1	12000.8	10079.9	11814.2
SSSGLLEWDSK	P06687	Heterogeneous nuclear ribonucleoprotein L	6079.38	5687.55	3762.39	7492.39	4017.49	10301.7	3095.72	9380.16	9920.56	4529.47	3098.61	6238.1	8072.92	5669.22	2052.43	4849.7
ASLNGADIYSGCCTLK	P06760	Heterogeneous nuclear ribonucleoprotein L	5486.59	3453.87	652.687	2623.87	3775.73	4540.94	916.661	2529.5	5922	2912.87	3415.05	2237.25	2794.21	2280.47	2830.6	2657.65
SSGLSSSLQPAGAK	P06761	Rho GTPase-activating protein 44	510.242	1610.92	1669.98	1239.85	1557.49	1985.24	1682.03	1588.37	N/A	1437.83	1408.91	1361.77	1503.84	1430.4	1454.59	1603.02
ELIFSAR	P06866	Methylglutaconyl-CoA hydratase, mitochondrial	17907.8	14981.9	11302.2	10016.4	11211.4	13431	12560.3	13339.9	16362.5	9418.67	15033.5	17280.4	10469.5	15889.9	13245.1	13771.1
LAIIPGGGGTQR	P07150	Methylglutaconyl-CoA hydratase, mitochondrial	24979.7	30045.4	24650	23475.7	26983	28485.9	24025.4	27577.2	25994.5	20235.3	27852	25794	21341	24946.4	29176.9	26923.3
GIVVLGINR	P07153	Methylglutaconyl-CoA hydratase, mitochondrial	32412	19763.2	20707.1	13926.6	21304.9	24069.2	19945.8	19380.4	32466.2	14023.3	22634.8	20175.4	17122.2	27423.6	15900.2	24272
SEVPGIFCAGADLK	P07323	Methylglutaconyl-CoA hydratase, mitochondrial	5071.94	7714.22	5962.04	4485.47	6955.29	6374.91	5483.42	5337.76	7270.97	4808.61	5194.41	7817.67	4954.88	5264.12	7247.37	7119.21
AVGLISHVLEQNQEGDAAYR	P07335	Methylglutaconyl-CoA hydratase, mitochondrial	1200.23	1717.19	1601.32	1968.97	1191.39	1393.15	2050.24	2601.84	N/A	1435.11	2087.42	2113.21	2597.54	2699.19	1154.14	2112.82
IVEAVIK	P07340	A-kinase anchor protein 13	5044.25	3238.12	3878.52	3481.87	N/A	4274.83	3686.53	3089.12	4598.84	2825.22	3984.93	4505.51	3257.27	3185.08	3703.26	4061.12
TIVAVEVQDQK	P07483	Kinesin-like protein KIF1A	N/A	1415.66	1592.53	1571.9	721.207	1283.6	1870.83	1195.46	1309.69	1322.65	1410.04	1255.48	1664.86	N/A	628.834	999.776
LDELQASDVTVK	P07632	Nucleoprotein TPR	2907.67	3508.86	3773.59	3241.15	3266.17	2960.53	3402.23	3956.79	3140.16	3771.01	2776.58	2698.01	3657.45	4000.6	5329.74	3063.63
LQEQVTDLR	P07825	Nucleoprotein TPR	3297.65	3754.74	4427.46	4610.32	4322.56	3740.17	3364.93	N/A	4576.44	4323.6	4574.7	5244.33	5144.42	4730.73	4891.56	5086.34
FEVAQVESLR	P07895	Nucleoprotein TPR	4858.58	4775.27	3641.48	3660.62	5998.41	3592.1	4663.91	4380.26	3585.79	3357.93	3906.84	4808.98	5060.61	3855.78	5426.08	N/A
TDELLALGR	P07943	Nucleoprotein TPR	2011.13	2232.05	2421.03	2557.47	3134.22	N/A	3637.43	1789.44	1300.61	2772.04	2186.9	2076.75	3284.61	3212.5	3357.97	2885.77
ISTQLDFASK	P08009	Nucleoprotein TPR	N/A	2311.25	2795.22	2255.29	1827.76	974.985	1666.01	1204.28	1056.8	1911.51	1838.96	976.43	2016.4	1182.4	1339.41	1071.13
NLGIQSQFTR	P08010	Nucleoprotein TPR	3253.89	4018.72	3234.71	2915.48	3040.37	3928.38	3650.49	4031.19	3327.24	3107	N/A	2904.37	4028.93	2993.02	3758.45	N/A
SQEQILEILR	P08413	Nucleoprotein TPR	N/A	1803.13	1353.32	1429.31	737.394	N/A	2734.67	1493.85	N/A	1718.4	1337.82	1493.62	2420.75	3682.38	4008.9	1963.93
YLDEIVK	P08461	Nucleoprotein TPR	N/A	6410.26	8573.17	6716.49	8717.88	N/A	7892.37	5677.95	8366.86	6534.68	8833.55	N/A	N/A	7522.94	8036.6	9332.38
SLEGQVENLQK	P08503	Nucleoprotein TPR	N/A	2378.1	2245.98	2003.99	N/A	1474.14	2465.85	2126.42	1782.55	2416.9	2062.63	N/A	2493.76	1866.55	2592.14	2583.57
EASIPLGILVVR	P09034	Diacylglycerol kinase iota	N/A	1394.98	2399.92	590.567	2619.81	4227.96	1751.56	2011.21	2448.53	1079.2	2826.57	2165.41	1594.14	4048.35	N/A	N/A
TNEGVIEFR	P09117	Serine/arginine-rich splicing factor 6	7985.08	7810.19	5478.92	7928.55	7816.7	8807.47	5637.46	8612.58	10121.4	6096.74	8130.74	8093.49	6745.84	N/A	5406.56	7201.85
ELGSLPLPLSASEQR	P09456	Syntaxin-12	6045.04	5192.78	5875.51	2564.4	6177.07	6334.61	4252.83	6189.24	N/A	2689.61	5635.57	7654.98	4166.88	5815.46	13755.9	5268.39
TVLVSSGLR	P09527	Prolow-density lipoprotein receptor-related protein 1	11057.9	7599.81	10871.6	10965.1	12292.8	11572.4	10926.6	10556.2	12307.5	10519.3	11074.9	12872.7	9433.61	10379.7	13399.6	10275.9
GDYSVLVPGLR	P09606	Prolow-density lipoprotein receptor-related protein 1	5018.41	2414.03	2901.6	1825.16	3077.97	2924.64	3053.8	N/A	3239.91	2600.08	3457.34	2655.76	2442.08	3335.58	3867.66	2716.99
IETAAMDGTLR	P09811	Prolow-density lipoprotein receptor-related protein 1	237161	228936	274355	242011	319255	318929	N/A	314278	187613	N/A	458751	237830	227640	493204	193279	196592
TGIGVQLK	P09812	Prolow-density lipoprotein receptor-related protein 1	3020.22	1619.56	2809.43	2074.04	3357.68	3111.67	2811.81	N/A	N/A	2070.01	2970.3	2136.45	2193.44	2862.01	3092.65	2187.94
LSVIGSIR	P09895	Prolow-density lipoprotein receptor-related protein 1	1749.98	1472.39	1692.82	1609.55	1670.35	2340.73	2264.45	1209.36	1622.83	1746.78	1491.48	N/A	1790.33	1028.4	1856.74	N/A
AVTDEEPFLIFANR	P09951	Prolow-density lipoprotein receptor-related protein 1	5997.44	2575.57	1669.37	542.735	4137.68	4187.67	2723.77	3426.14	4075.42	1750.75	3839.99	1807.45	3385.32	4563.37	12845.7	3456.36
GVAGAQPTVTLLR	P0C0S7	Prolow-density lipoprotein receptor-related protein 1	9878.6	9048.93	10195	6744.93	9395.83	11081.1	8170.38	10604.6	8229.3	7295.58	9450.08	11712.1	8211.06	9597.37	12214.9	8695.04
GPVGLAIDFPESK	P0C1X8	Prolow-density lipoprotein receptor-related protein 1	1723.58	N/A	1861.44	1400.76	3172.81	1963.91	2032.15	1968.84	N/A	1591.93	2020.6	2405.4	2035.96	2151.05	3734.58	2699.3
AALSGANVLTLIEK	P0C219	Prolow-density lipoprotein receptor-related protein 1	976.89	803.402	908.63	806.527	601.144	N/A	869.186	N/A	N/A	780.856	N/A	904.572	1115.72	1429.45	2408.95	796.315
SDVEAIFSK	P0C2X9	Heterogeneous nuclear ribonucleoprotein C	7627.18	8866.34	3485.97	7161.48	8202.54	10331.4	2715.92	8121.33	6309.91	6181.08	9869.42	8918.34	5654.39	5496.13	4491.63	4064.98
VDSLLESLEK	P0C5E9	Heterogeneous nuclear ribonucleoprotein C	7948.57	5802.26	2916.87	5331.63	5775.76	9829.88	3048.46	7313.97	8938.81	4865.84	7699.53	8772.17	4708.02	9734.13	7544.74	N/A
VPPPPPIAR	P0C5W1	Heterogeneous nuclear ribonucleoprotein C	56097.1	59347.7	14074.7	54355.2	53351.8	86856.5	23516.5	60357.1	70294.8	29626	56608.9	58515.8	45007.6	29406.2	N/A	40671.9
GFAFVQYVNER	P0C5X8	Heterogeneous nuclear ribonucleoprotein C	22353.4	14747.5	6982.18	10860.5	16852.3	22855.4	7300.44	17325.2	27986.3	10480.5	15887	15201.2	9614.87	12286.1	3917.13	10454.9
VFIGNLNTLVVK	P0DJJ3	Heterogeneous nuclear ribonucleoprotein C	9676.85	6414.32	3002.04	4135.98	7753.72	13585.4	2608.22	6368.6	13808.6	3659.72	8352.21	6333.68	5416.68	8700	5416.6	5796.01
QKVDSLLESLEK	P10066	Heterogeneous nuclear ribonucleoprotein C	2498.53	2393.27	1002.52	3287.44	3276.93	2321.45	N/A	2910.76	N/A	2374.9	2775.21	N/A	2227.5	2967.26	998.213	2127.52
MIAGQVLDINLAAEPK	P10067	Heterogeneous nuclear ribonucleoprotein C	3087.84	1893.71	N/A	859.593	1198.64	3255.54	N/A	4137.92	3513.26	889.927	5337.77	4215.76	1478.39	2727.07	N/A	1132.1
LVINPLNQLLNMFTGPYK	P10111	Dynamin-binding protein	3715.98	7784.4	25089.8	16382.2	14730.1	11149.2	24664.1	9396.25	2992.16	15310.6	10222.6	12826.3	9224.78	7478.64	5524.79	6961.22
LVLLGESAVGK	P10536	Ras-related protein Rab-5A	42583.4	35335.3	36298.7	23684.1	34527	38892.8	35463.6	32519.4	41278.8	27364.1	30906.3	40423.4	27709.2	44212.2	44578.6	35303.4
GVDLTEPAQPAR	P10688	Ras-related protein Rab-5A	12739.7	11647.7	13089	8443.18	10237.9	11262	10111.3	10660.7	13206.1	10911.5	9409.46	12794.1	9430.68	10536.3	11982.3	11481.1
FEIWDTAGQER	P10719	Ras-related protein Rab-5A	5437.39	3860.16	5235.61	3858.07	2462.79	4090.96	5481.59	5272.52	5961.79	3778.57	565.785	3697.19	4773.02	2496.15	N/A	3648.73
GAEILADTFK	P10760	N(G),N(G)-dimethylarginine dimethylaminohydrolase 1	8698.53	9508.88	8316.84	5648.78	8395.11	8298.35	7734.2	7116.17	9574.6	7563.76	8719.63	7912.54	6658.6	8040.23	9753.35	8814.15
DENATLDGGDVLFTGR	P10860	N(G),N(G)-dimethylarginine dimethylaminohydrolase 1	7060.26	3428.72	3204.48	1727.37	4044.29	4540.92	2790.67	4518.3	4053.13	2300.84	4255.3	4639.42	2898.34	5120.13	7856.06	4307.93
DYAVSTVPVADSLHLK	P10888	N(G),N(G)-dimethylarginine dimethylaminohydrolase 1	4550.95	2785.72	2599.04	2049.49	5077.11	5228.57	4956.26	4276.02	N/A	2182.86	3319.61	4990.82	2577.83	4768.83	6552.35	4466.02
EIQGFFNIPVDNLR	P11167	Phosphoribosyl pyrophosphate synthase-associated protein 2	7323.92	3108.83	2219.77	596.167	4043.73	5728.21	2805.32	4833.47	6127.56	2156.21	4397.08	4672.84	3125.64	8239.56	11599.3	5027.62
EEDGSLSLDGADSTGVVAK	P11232	Transcription intermediary factor 1-beta	3659.46	1685.29	3354.19	2277.25	1735.92	2503.3	4429.73	3773.64	2005.42	2793.73	2855.35	2800.2	4617.1	4072.27	6009.67	2736.6
DHQYQFLEDAVR	P11240	Transcription intermediary factor 1-beta	10770.7	8691.47	9113.97	8058.01	22118.3	18358.8	12215.3	9617.11	11008.6	9324.6	8246.12	19785.8	10181.8	12077.7	10811.5	9946.22
LSPPYSSPQEFAQDVGR	P11250	Transcription intermediary factor 1-beta	2975.9	1932.42	2321.92	1687.03	2729.05	1368.09	2833.28	1947.23	4088.95	2129.65	2257.24	1821.16	3558.11	1503.4	5868.98	4296.07
LDLDLTSDSQPPVFK	P11275	Transcription intermediary factor 1-beta	36998.6	16913	19204.2	4051.95	24500.6	27180.7	15300.6	20358.7	17247.2	13623.4	16772	24319.5	15764.8	24969.6	56538.6	19998.5
LLASLVK	P11348	Transcription intermediary factor 1-beta	20662.9	15154	16979.3	13507.9	16050.2	21259.2	19963.2	17779.6	17943.2	14981.6	16175.5	18237.6	16596.9	22059.9	21881.9	18096
ADVQSIIGLQR	P11442	Transcription intermediary factor 1-beta	40530	31875.2	34881.1	18510.7	32551.9	32951.9	40234.6	32119.5	37398.3	27717.1	23842.1	38307.3	32916.8	41242.6	57207.4	36187.9
DIVENYFMR	P11475	Transcription intermediary factor 1-beta	6126.37	8126.43	7556.43	6579.53	12249.1	10436.6	5875.35	8015.31	5063.8	6401.56	14073	7080	7265.26	10919.6	9206.92	8867.75
LIYFQLHR	P11505	Transcription intermediary factor 1-beta	6663.15	4264.63	6134.53	4589.5	4370.2	3491.57	5845.74	2512.81	7327.97	4425.05	4753.31	2474	3397.58	7214.81	N/A	4203.23
FSAVLVEPPPLNLPSAGLSSQELSGPGDGP	P11506	Transcription intermediary factor 1-beta	1916.4	1138.47	2729.5	612.807	3096.95	2669.14	5045.63	2401.14	2261.36	1904.09	2422.9	3938.63	3198.37	3557.98	22070.9	2824.78
HEPLVLFCESCDTLTCR	P11507	Transcription intermediary factor 1-beta	N/A	4996.39	2456.69	3848.96	1975.54	1533.95	4430.77	3924.53	2913.57	3961.43	N/A	3199.9	5074.38	893.736	N/A	2004.78
MAILQIMK	P11517	Transcription intermediary factor 1-beta	2220.76	4178.12	7074.63	5867.06	5598.55	4581.24	2753.65	4758.08	1575.1	3305.41	10857.4	3718.49	4061.57	8692.5	4544.27	3527.73
GGIVDEGALLR	P11530	D-3-phosphoglycerate dehydrogenase	12029	7229.06	6611.78	5254.3	6674.52	6177.12	7743.31	11568.1	10070.3	9279.13	6723.17	7103.74	8818.66	10584.1	10939.2	6324.23
VTADVINAAEK	P11598	D-3-phosphoglycerate dehydrogenase	8013.57	6508.31	6771.03	5066.93	5746.92	6627.93	6923.5	9253.16	8179.92	9317.29	5255.71	6485.92	8720.47	7481.63	8490.44	5163.98
GQPLLLFR	P11608	D-3-phosphoglycerate dehydrogenase	10134.5	4079.45	4273.33	2510.17	5276.57	5964.11	5612.99	7108.41	8966.47	4914.88	5271.74	3466.45	6638.83	7746.56	8967.22	6537.82
TLGILGLGR	P11654	D-3-phosphoglycerate dehydrogenase	3015.76	N/A	N/A	1687.09	3268.88	4306.92	3819.04	3595.83	4662.47	2204.93	2669.58	2844.88	4623.42	6985.45	5824.8	2831.99
GTIQVVTQGTSLK	P11661	D-3-phosphoglycerate dehydrogenase	10822.3	9429.57	7750.53	7373.46	8241.58	7939.13	9196.83	11766.3	12937.5	9502.79	6682.31	6748.07	10465.2	12561.4	10000.1	6413.12
AGTGVDNVDLEAATR	P11883	D-3-phosphoglycerate dehydrogenase	4218.44	3831.92	3468.52	2946.93	2695.77	2657.22	3649.26	5532.06	4769.62	4256.05	3567.49	3497.33	4328.5	4387.07	5017.26	1689.27
NAGTCLSPAVIVGLLR	P11884	D-3-phosphoglycerate dehydrogenase	3233.9	1713.84	2495.9	601.743	3230.16	3201.02	3473.24	3740.77	5345.45	1266.91	N/A	1779.02	3697.72	6994.49	7020.82	3670.06
DFLVIPSPVLVK	P11915	Phosphatidylinositol 4-kinase alpha	6933.33	2474.14	6922.3	1318.01	8510.73	18510.9	5093.74	5356.68	10423.4	2292.94	15829.2	6604.22	5460.91	10004	32405.5	7334.57
SNLDITVGSR	P11980	Phosphatidylinositol 4-kinase alpha	3155.86	3639.44	5568.92	5077.49	5376.38	4430.51	5469.5	5242.06	2812.37	5397.45	4892.15	4604.5	4802.78	4568.63	3489.35	4861.39
NDTVTPAELNELR	P12001	Phosphatidylinositol 4-kinase alpha	3566.84	3047.05	3825.27	2907.01	3703.79	3065.6	3662.17	3114.42	2869.15	3239.21	4171.56	3987.25	3894.46	4029.23	4459.85	3903.25
IVEEPVLK	P12007	Phosphatidylinositol 4-kinase alpha	2322.78	2523.72	3057.96	3116.28	N/A	3130.86	3144.62	2925.22	2833.59	2564.09	2758.12	2764.47	2641.26	2512.45	3731.46	2987.64
DIAIDNICR	P12075	Phosphatidylinositol 4-kinase alpha	1973.48	3745.29	2623.4	2422.8	3854.14	N/A	2691.84	2585.66	2488.66	3270.43	3634.69	3751.51	2991.07	2645.2	2148.69	2749.5
IPEELEGVR	P12346	Phosphatidylinositol 4-kinase alpha	1805.46	2320.14	2735.88	3543.54	1948.44	2448.88	2958.54	N/A	1816.1	3256.71	3043.49	2891.53	2167.3	N/A	1712.47	1679.13
ISVTNEHSESTLNVLPGK	P12368	Phosphatidylinositol 4-kinase alpha	1691.95	N/A	2017.71	1525.81	1724.36	1647.85	2138.35	2061.18	1818.2	1508.31	1397.02	2298.88	1694.33	2405.26	2262.98	1605.97
GALVLGSSLK	P12369	Glycogenin-1	14886.5	10568.5	10954.4	8465.42	11690.4	11168.7	9943.09	9978.23	12410.8	9201.61	10683.9	9663.62	10040.5	11693.4	12115.5	10591.5
LGVTGAEEQALGSK	P12711	STE20-like serine/threonine-protein kinase	2592.17	2063.69	2882.81	2627.15	2696.67	N/A	2025.03	1781.19	2034.32	2437.85	1871.14	2639.24	3186.79	1906.19	2832.11	2908.35
AALLDQIR	P12749	Neural Wiskott-Aldrich syndrome protein	5918.97	3830.98	4087.81	4015.89	3988.48	4927.17	4788.82	4768.59	5043.33	3084.23	3654.91	4876.6	4023.7	4828.45	5036.72	5376.14
NDFEIVLPENAEK	P12785	Cell division cycle 5-like protein	2084.29	2117.34	1125.53	2383.91	1692.84	2727.97	1583.77	3022.45	2614.65	2321.88	1644.78	2102.94	2183.1	1788.96	2528.03	2220.02
TIAPIIGR	P13084	Cell division cycle 5-like protein	6577.42	6276.19	4330.81	5632.11	5957.42	6354.02	4960.15	5177.68	6423.2	3995.44	5856.08	5309.68	5028.43	4735.55	N/A	5322.08
ILLGGYQSR	P13086	Cell division cycle 5-like protein	9286.85	8252.01	N/A	7196.19	6128.32	7983.28	5958.54	6286.36	9374.68	6335.24	7822.54	N/A	7192.32	5130.72	6496.2	6876.17
GVDYNAEIPFEK	P13221	Cell division cycle 5-like protein	N/A	2424.13	1752.78	3001.11	2872.85	3840.08	2120.84	2749.45	N/A	2380.1	2588.88	2738.4	2428.19	1819.05	N/A	3482.32
LGLLGLPAPK	P13233	Cell division cycle 5-like protein	1264.48	1566.32	1064.84	1527.66	1678.04	1886.38	1046.08	1812.45	977.918	1411.82	2009.92	1305.66	1562.96	1378.82	2620.61	1080.63
GGLNTPLHESDFSGVTPQR	P13264	Cell division cycle 5-like protein	N/A	2438.78	1650.88	2899.88	2151.92	1898.91	1678.33	2461.3	1882.79	1660.22	1242.11	2631.82	2581.81	1423.74	1486.91	1806.44
GLFPENFTR	P13383	Amphiphysin	29162.1	21475.2	23938.4	13241.6	23017.2	23367.7	26011.8	18013	23315.5	18649.8	18252.9	23364.8	21072.1	19941.6	27287.4	21243.4
GYLAAIK	P13471	Amphiphysin	20316.5	15234.3	17087.5	12082.3	19416.6	18761	20140.1	15557.2	16354.2	13417.7	15943.1	16290.7	15016.2	18288.8	22104.5	17211.4
EATEDVAPQGPAGEK	P13596	Amphiphysin	15189.6	6041.1	2176.42	1059.21	2386.49	3827.33	4286.24	3997.01	7916.38	3649.22	1729.88	3503.54	1918.8	4503.47	5907.45	3142.18
AALPAGEGESPEGAK	P13635	Amphiphysin	6887.94	4566.21	7440.59	3780.83	5618.99	6417.76	6234.21	5243.19	3824.2	4501.99	3885.95	5701.4	4459.35	5799.28	8388.9	4650.92
ESDWLQYR	P13638	Amphiphysin	3414.71	N/A	4731.57	3064.52	2243.63	1959.82	5149.73	3021.47	3859.41	5712.63	N/A	2225.86	4924.17	N/A	2365.34	3649.43
AFSIQGAPSDSGPLR	P13676	Amphiphysin	37206.7	35957.1	41955.9	21456.1	39048.8	35519.7	31728.4	32227.8	34451.5	27938.7	29027.1	35134.7	28700.2	33652.7	45728.9	33273.3
VGFYVNTFK	P13697	Amphiphysin	14648.7	7943.44	11023.2	8182.69	12538.4	9389.79	11619.6	6699.66	11262.6	9597.7	9278.4	9146.07	10379.6	8691.32	11239.6	11406.2
ADETKDEQFEEYVQNFK	P13803	Amphiphysin	3079.16	3452.31	4769.6	3223.07	2687.81	3387.24	5056.93	3637.6	5163.39	4384.58	3504.03	3829.24	3977.9	1712.08	4727.85	5030.18
IDVESTELASSESPQAAELEAGAPQEK	P14408	Amphiphysin	738.756	1481.53	3362.02	1876.05	3484.72	2315.85	3431.39	1694.84	1918.04	2032.74	2287.53	2724.29	1718.27	N/A	4577.5	2284.2
VETLHDFEAANSDELTLQR	P14480	Amphiphysin	5960.3	4953.24	6876.26	5321.85	4107.39	4531.66	8277.89	6775.15	3770.9	5572.09	2655.62	6052.41	6565.63	4699.85	495.66	4778.12
GVFPENFTER	P14562	Myc box-dependent-interacting protein 1	34282.6	20502.7	34056.3	17354.6	31091.3	27820.1	30560.9	20958.8	25055.3	22325.5	16871.4	22984.4	20733.6	22850.8	35301.1	21764.4
IAKPVSLLEK	P14659	Myc box-dependent-interacting protein 1	6808.69	5290.43	6009	4466.46	5986.13	5491.91	5772.95	5253.5	5806.44	4631.96	4318.23	5437.83	4885.57	5898.6	7640.06	5575.23
NQAEEELIK	P14668	Myc box-dependent-interacting protein 1	6675.79	7192.85	1436.21	666.188	1839.74	2449.92	2443.27	1997.64	4590.42	2323.97	N/A	1962.09	1141.18	1861.2	2300.8	N/A
ADETKDEQFEQCVQNFNK	P14841	Myc box-dependent-interacting protein 1	N/A	N/A	1185.06	1214.23	634.82	1061.56	1354.24	582.96	471.513	1393.07	343.193	741.984	1394.34	N/A	1067.78	964.955
VNHEPEPASGASPGATIPK	P14881	Myc box-dependent-interacting protein 1	3844.05	4379.27	3589.8	2240.34	3251.79	2680.08	3384.93	3109.14	3479.61	2688.13	2358.45	3138.34	1407.63	1966.1	4074.33	2679.95
LNQNLNDVLVSLEK	P14942	Myc box-dependent-interacting protein 1	3041.24	1772.42	2051.95	425.89	1787.58	2250.44	1582.36	2094.9	2824.34	1184.77	2099.05	1913.91	1464.09	3005.58	7386.98	2798.02
VQAQHDYTATDTDELQLK	P15087	Myc box-dependent-interacting protein 1	2851.89	4036.56	6113.88	4081.1	3564.89	2429.98	4750.86	2139.02	1174.3	4197.27	2312.25	2413.85	3957.22	2650.74	5396.37	2393.58
VIAPTNAEVLPILPEPESLELK	P15146	MAP kinase-activating death domain protein	3330.05	2300.33	4778.18	889.853	5189.58	11174.3	3835.39	4065.91	4071.85	1998.4	7584.46	5983.35	3685.72	5819.95	18065.8	4398.42
SQISADSGVSLASASQR	P15178	MAP kinase-activating death domain protein	8457.62	6365.57	9293.91	7016.29	9932.59	N/A	4388.17	9946.59	4774.35	4224.93	12188.3	8122	8096.44	14485.1	6721.59	7939.47
TTPFPSLK	P15205	MAP kinase-activating death domain protein	6524.4	5737.17	7348.34	4196	6238.28	7138.92	5791.9	4269.56	4834.08	4647.38	4978.42	6739.5	4694.2	5935.82	N/A	5184.93
GGDLFDAITSTSK	P15387	Serine/threonine-protein kinase DCLK1	13300.5	5070.5	8806.52	5221.76	10911.5	12382.3	6267.91	9679.05	9320.61	5001.67	10896.2	10524.1	7840.08	12965.4	17089.3	9705.83
GVDSIPGFEFNR	P15650	Aminopeptidase B	21021.1	16662.2	14628.5	7576.97	19098.5	21395.2	12037.8	15316.2	16399.8	9318.43	16185.1	18916.2	11613.5	19179.6	22675.3	19059.3
AEFGPPGPGPGSR	P15791	Aminopeptidase B	14106.1	14477.4	13161.9	13708.6	14391.6	13195.4	12600.2	12612	15703	13199.3	12453.6	13090.5	14139.5	11969.9	16456.4	17199.8
CLLPEGASELR	P15865	Aminopeptidase B	14420.8	12600	11606.4	7787.71	10811.1	15750.8	10397.4	11541.1	12546.1	9236.37	9411.47	11405.1	11833.1	12495.7	15310.6	14118.2
AFFPCFDTPAVK	P15887	Aminopeptidase B	9122.38	7602.75	7198.08	3585.67	8353.94	10405.9	5554.11	7411.7	7433.45	4912.15	7284.31	8684.73	6123.71	6181.82	12140.9	8224.86
GDSDVPEVPPSSDR	P15999	Phosphatidate cytidylyltransferase 1	64713	61974.9	74055.7	63318.6	76843.5	74992.5	69163.9	74787.9	40476.1	66973.3	75035.3	82436.9	75729.2	83431.8	87090.9	49019.2
EEQLQFLIR	P16036	Phosphatidate cytidylyltransferase 1	N/A	2941.88	3990.09	2016.38	2400.68	2468.74	2049.36	4400.65	3257.63	2378.45	4375.44	4882.89	3377.64	4495	4043.26	2972.1
VLQQLLVLQPEQQLNIYR	P16086	Phosphatidate cytidylyltransferase 1	2519.75	2354.61	3930.47	1595.08	7018.67	8516	3829.6	2719.66	4773.14	2441.35	7241.33	4598.26	3099.34	4250.25	6038.92	3414.65
GILQPTWK	P16446	Phosphatidate cytidylyltransferase 1	N/A	6247.84	8106.38	6668.88	5219.76	7192.5	11853	8171.97	8887.94	7332.6	3068.56	5781.24	9441.42	4833.27	5652.99	6402.86
EAEPDLLAVLR	P16617	Neurochondrin	2241.22	2848.67	2517.37	1213.05	2731.67	3710.59	1804.11	2632.9	1745.99	2066.5	2216.82	2549.47	2146.52	5058.81	7918.63	2778.18
IPILCTFLTAR	P16638	Neurochondrin	N/A	1387.49	2670.22	1020.5	3090.26	2043.22	1998.96	N/A	3946.15	1626.38	3177.74	1248.62	1717.41	3469.63	3682.77	2489.48
LLSTSPALQGTPASR	P17074	Neurochondrin	6525.07	5714.08	5879.29	5231.9	5726.58	6102.85	5890.82	6383.71	5002.44	6094.93	5703.9	6703.75	5050.22	6262.77	7758.22	4912.45
IFDAVGFTFPNR	P17077	Neurochondrin	1937.65	3785.97	3334.36	1951.13	3469.55	4899.48	2565.36	2256.48	5858.15	3054.43	3044.03	2822.76	2909.82	2738.14	N/A	2844.82
NDSEQFAALLLVTK	P17078	Neurochondrin	1818.22	792.244	915.892	682.945	N/A	1224.51	1540.08	1772.08	1072.8	985.186	891.672	1665.58	1868.09	N/A	N/A	1092.55
SVQYDDVPEYK	P17220	CD166 antigen	2479.59	3160.27	3058.89	2415.29	2372.67	2383.9	3769.68	2095.6	2064.54	2884.07	2523.67	3239.88	3208.24	3011.94	3474.32	2954.22
SSNTYTLTDVR	P17425	CD166 antigen	2462.78	1895.55	2452.23	2299.59	2714.25	2001.53	2584.83	2476.27	2780.59	3099.99	1847.71	2776.49	2621.03	2432.38	3055.98	3476.92
TYLPSQVSR	P17438	Coatomer subunit beta'	13062.2	12702.1	9771.89	9752.36	12486.6	10305.4	13942.5	12077.4	13607.6	10622	11243.3	13283.9	11924.7	12740.6	13967.3	13088.8
LPEAAFLAR	P17475	Coatomer subunit beta'	10964.3	8561.48	8900.37	6815.34	10513.7	8810.23	11308.4	9424.77	9626.92	6808.55	8478.52	11135.7	7703.94	8950.47	8920.97	9293.09
VFNYNTLER	P17702	Coatomer subunit beta'	6277.87	4691.63	5427.52	4985.98	5686.12	4843.24	5743.3	6947.29	5401.15	5637	5122.39	6913.36	5149.92	7136.54	7039.62	4570.66
QYPLVTPNEER	P17764	Coatomer subunit beta'	N/A	9131.3	8072.86	6749.45	10554.9	9531.14	8280.89	9936.08	8513.95	8014.83	8720.79	7169.6	7720.4	9796.18	11316.2	9818.21
AAESLADPTEYENLFPGLK	P18088	Coatomer subunit beta'	4565.21	2047.52	3243.49	1014.35	3390.21	4263.19	2356.55	5281.89	5565.37	1691.46	3801.13	3844.08	2905.41	4614.14	25627.2	3389.37
TFEVCDLPVR	P18163	Coatomer subunit beta'	6056.86	7169.07	6582.97	5862.87	8097.89	7411.85	5909.87	6111.73	4795.1	7174.98	6260.5	7857.05	4837.17	5155	6721.41	6445.64
GSNNVALGYDEGSIIVK	P18265	Coatomer subunit beta'	4810.3	4090.19	4540.95	3226.09	5150.48	3209.31	4264.71	4497.83	4740.91	3677.62	3373.73	3752.28	4000.23	4138.19	5827.48	4262.96
VLPTIPK	P18266	Coatomer subunit beta'	5739.28	3114.62	3506.63	3920.36	5516.98	5348.03	4740.37	4059.27	4508.97	4509.8	4778.27	5783.62	4235.68	4962.66	4900.57	5140.52
ALYDFEPENEGELGFK	P18298	Endophilin-A1	18064.5	11794.3	10415.6	2921.23	13620.4	11747.1	9423.96	11462	19118.9	6849.02	17038.1	13283.6	10174.6	14866.4	31186.3	17249.1
QAVQILQQVTVR	P18395	Endophilin-A1	6728.32	6364.11	3815.7	4700.34	5365.81	6601.74	7450.86	5740.14	8711.03	4926.96	4210.46	5623.7	5635.65	6562.32	8136.57	6291.21
QNFIDPLQNLHDK	P18418	Endophilin-A1	N/A	2506.35	2717.9	1808.76	1369.09	N/A	2060.39	1285.63	2479.29	2077.85	1638.84	1805.54	1970.05	959.862	1707.88	2048.64
DFTPVCTTELGR	P18420	Peroxiredoxin-6	8120.08	8441.01	6315.56	5066.44	8449.12	6752.64	5329.62	7550.78	9218.66	6095.94	8248.27	6766.92	7115.95	6332.89	8271.14	9277.25
NFDEILR	P18421	Peroxiredoxin-6	13104.3	8983.18	8542.15	6852.56	8563.96	8770.54	7523.85	7725.39	10406.2	7568.85	8798.86	10573.9	8275.61	9391.5	10552.3	10217.7
VVFIFGPDK	P18422	Peroxiredoxin-6	7826.3	3974.85	3719.91	2478.65	4283.26	3907.4	2968.1	3469.45	10148	3998.41	4815.2	4454.89	3965.96	4784.92	N/A	3841.66
LSILYPATTGR	P18445	Peroxiredoxin-6	25927.6	19980.4	19468	13389.1	19482.2	21166.8	16956.3	19083.4	27846.7	14344.9	22090.7	18051.6	18868.4	25649.4	26573	24428.8
VVVLGLLPR	P18484	Platelet-activating factor acetylhydrolase IB subunit alpha1	5339.01	3489.74	3685.32	2354.5	3170.76	5396.21	3503.57	3448.86	4201.05	2302.62	5667.98	4795.14	2985.99	4646.37	3713.5	3911.35
AIVQLVNK	P18665	Platelet-activating factor acetylhydrolase IB subunit alpha1	8408.19	5663.84	6386.04	6487.46	6198.96	6576.43	7021	6205.92	7321.79	5624.48	7718.94	7682.88	6131.12	8618.91	8541.92	8011.62
IIVLGLLPR	P18886	Platelet-activating factor acetylhydrolase IB subunit alpha2	7537.23	3440.95	5659.78	2562.86	6656.24	9506.89	4031.43	3189.71	5181.12	3592.25	7773.11	3528.73	4014.98	8612.06	4576.42	6875.34
ELFSPLHALNFGIGGDTTR	P19132	Platelet-activating factor acetylhydrolase IB subunit alpha2	3752.05	1755.05	2182.19	1348.39	3529.67	2855.5	2241.84	3373.59	4477.5	1592.33	2195.05	2591.12	2687.08	4474.06	N/A	3720.37
LGIIGVVNR	P19139	Dynamin-1-like protein	22355.6	17115.7	20367.2	13831.2	22971.7	21189.4	16138.5	18420.5	23048.8	15228.9	20348.5	17007.4	15657.4	25759	17822.9	18248.4
SATLLQLITK	P19234	Dynamin-1-like protein	7570.16	6763.37	7602.07	4335.21	8398.54	9030.4	5831.76	6411.11	8632.34	5141.6	8958.66	5301.28	5999.93	15323.9	12963	9045.57
YIETSELCGGAR	P19332	Dynamin-1-like protein	9723.6	273935	7597.16	7404.81	7100.22	8841.16	8174.64	8874.85	9133.16	8802.72	7358.45	7255.85	8256.21	9432.95	9599.85	9190.04
SSVLESLVGR	P19468	Dynamin-1-like protein	17797	10799.7	11444.6	8203.67	13812.1	14349.9	10751	12070	14861.4	10365.1	10212.9	14440.1	10883.7	20979	21589.6	13141.7
DIELQIR	P19491	Dynamin-1-like protein	7117.56	7671.49	8726.85	5956.95	7968.2	8895.73	7819.31	9252.71	6236.56	5609.92	8731.18	10518.7	6978.79	8977.15	10200.1	8199.61
FATEYCNTIEGTAK	P19492	Dynamin-1-like protein	4043.55	3194.73	2795.83	2662.07	3532.59	3351.06	2361.88	3483.5	2988.59	3242.57	2472.66	3249.11	3177.47	3906.44	2957.32	3698.96
GVSPEPIHLK	P19511	Dynamin-1-like protein	4017.42	3761.98	3617.29	3275.39	3329.68	4472.82	3519.17	3768.37	4004.42	3314.69	3245.95	4814.36	3754.35	3947.54	3683.42	3945.32
INVLAAQYQSLLNSYGEPVDDK	P19527	Dynamin-1-like protein	635.477	1172.39	1610.95	606.236	1513.55	1476.72	1312.22	1367.48	N/A	825.444	1728.31	1688.89	1172.27	1702.01	635.452	1500.38
MEALIPVINK	P19627	Dynamin-1-like protein	3023.63	1301.4	3009.04	732.41	4800.06	6043.1	1409.42	2809.7	1235.64	1064.99	6669.99	N/A	1381.84	4375.74	2526.38	2373.75
DTLQSELVGQLYK	P19686	Dynamin-1-like protein	12116.8	5909.6	6266.28	2338.5	8952.32	11022.9	5588.57	8342.03	10636	3531.86	6462.7	7640.25	5452.14	13193.2	28344.1	8037.06
VPSALAPASQEPSPAASAEADGK	P19804	Dynamin-1-like protein	2379.7	3627.18	4415.17	3384.17	5403.38	4193.47	2775.4	2995.15	2148.61	2943.47	3003.93	3975.2	3181.27	3130.51	4757.06	3938.07
SYFLIVR	P19945	Dynamin-1-like protein	11868.7	6783.09	9378.84	4599.36	7951.66	8437.69	8052.47	5327.93	10686.7	6157.3	7661.33	5907.58	6357.42	7027.74	N/A	7267.33
GHAVNLLDVPVPVAR	P20059	Dynamin-1-like protein	N/A	4136.47	4649.67	3778.16	N/A	2959.86	5623.22	4307.2	4798.73	5073.48	3305.59	4767.93	4470.28	4988.01	5049.22	5663.92
YDYVLTGYTR	P20070	Pyridoxal kinase	5182.37	4225.57	3279.01	3483.87	4154.2	3066.89	3240.35	4124.5	4876.43	3517.94	2792.36	2743.92	3377.04	2842.98	3332.62	4052.93
VLSIQSHVVR	P20595	Pyridoxal kinase	4265.88	2713.05	2818.22	2374.83	2767.1	2461.09	3007.17	2431.4	3542.64	2269.12	2392.15	1868.74	2397.51	3233.49	2885.41	3420.88
VVPMADIITPNQFEAELLSGR	P20650	Pyridoxal kinase	3993.25	1343.66	1645.6	651.411	3572.34	2957.98	3352.83	4238.03	2959.44	929.218	7903.68	6974.32	1165.69	3639.77	2926.83	1353.23
KDIEDPEIVVQATVL	P20651	Pyridoxal kinase	2842.66	1498.13	901.431	1249.52	2346.86	344.326	1364.81	2049.37	N/A	1287.42	611.693	1653.32	511.378	794.129	N/A	1176.92
AEAGEGQKPSPAQLELR	P20717	Pyridoxal kinase	2688.56	1565.99	2210.89	2408.72	2842.45	2434.88	2868.99	1998.73	2876.63	2832.47	2492.95	2895.04	2432.42	2598.92	2657.59	2896.25
MGPDTVVITSSDLPSPK	P20788	Pyridoxal kinase	6062.68	6718.95	5319.74	2071.22	6068.89	6335.57	2745.16	7741.39	4754.29	2680.5	9727.51	7214.13	5051.39	8186.48	8961.16	6327.35
GSDYLMALGSQR	P20942	Pyridoxal kinase	2858.68	5385.93	5378.12	3234.53	6165.33	5715.74	3925.38	5941.05	3530.19	4120.74	7839.3	3220.54	3656.88	9468.31	6038.92	3300.51
FPTLGGR	P21139	Vesicular inhibitory amino acid transporter	38250.2	38204.6	31329.6	28891.2	35318.3	46391.8	37326.6	31114.9	33971.5	25793.6	38102	36544	33015.8	34062.9	36213.1	35021.3
SEGEPCGDEGAEPPVEGDIHYQR	P21396	Vesicular inhibitory amino acid transporter	7236.41	3365.06	6988.38	6602.45	7270.53	8032.05	7620.97	8249.13	9692.94	6188.93	7273.84	4965.57	9971.55	9499.41	12858	6742.46
DSYVAIANACCAPR	P21531	Vesicular inhibitory amino acid transporter	27018.8	15750.2	14484.4	6219.14	21563.7	17568.3	15322.9	17785.5	25529.6	12923.3	14431.8	15952.8	16241.3	20663.6	20292.1	22222.2
EVITDNLPGSIR	P21533	Vesicular inhibitory amino acid transporter	79026.8	64908.2	63592.4	37229.7	64688.1	69142.4	60879.4	61174.9	67887.1	41206	59208.4	77284	54994.2	69769.3	77402.9	69380.6
AFFPACYGGDGR	P21575	Vesicular inhibitory amino acid transporter	23958.2	20120.9	16626.5	12560.6	19224.4	18341.5	17691.8	18016.9	20812.6	13455.7	20606	19629.2	16449.6	16229	19671.4	20140.2
GPFEGPNYHIAPR	P21588	Medium-wave-sensitive opsin 1	9406.87	6872.21	9148.62	5683.23	8689.74	7899.34	10270.8	9119.42	14185.9	4411.21	12073.6	11000.3	5937.01	9689.52	8292.71	13166.8
NCILQLFGK	P21670	Medium-wave-sensitive opsin 1	9565.56	9605.08	9590.02	5176.45	9983.44	13346	7208.67	9290.75	12368.5	5755.03	11232.1	7611.23	8229.57	21258.1	15814	14620.3
YWPYGLK	P21707	Medium-wave-sensitive opsin 1	8039.6	6329.09	7614.91	5759.28	7362.31	8270.75	7360.37	7378.3	9654.87	4915.49	5377.13	5338.32	8435.36	6408.38	N/A	10748.7
SATIYNPIIYVFMNR	P21708	Medium-wave-sensitive opsin 1	7624.18	N/A	6928.76	1342.82	3723.25	20989	2093.12	4498.7	7987.12	N/A	2784.96	3136.01	5260.05	10819.2	N/A	10316.9
NILTEIYR	P21913	Ras-related protein Rab-11B	10345.5	8857.83	9658.68	6108.34	8742.96	9218.18	8510.7	7805.58	13044.3	7590.06	8104.66	9745.18	7530.68	14137.5	14666.2	10425
INAEFLR	P22057	Rab GTPase-binding effector protein 1	N/A	27229.5	25996.7	32010.1	39950.4	57874.9	20831.2	34997.6	28170.4	25898.6	45498.4	40321.9	28385.9	38695.1	N/A	29789
DGQVIGIGAGQQSR	P22062	Bifunctional purine biosynthesis protein ATIC	25232.8	28960.8	25956	22576.2	24994.6	26050.2	21244.1	29810.8	20925.7	27434.7	26803.8	28654.9	25340.2	28827.4	29128.3	26935.1
LSGVSVSSDAFFPFR	P22831	Bifunctional purine biosynthesis protein ATIC	7171.75	3480.08	6405.28	2216.86	7067.22	6771.13	5218.91	5971.32	5887.56	4459.4	7805.18	4997	4669.19	8935.83	9023.41	5780.11
TGLVEFAR	P23358	Bifunctional purine biosynthesis protein ATIC	26056.3	19805.2	19953.3	15224.7	21929.3	25017.5	19883	20171.1	21464.1	18050.2	20163.9	23898.1	18836.6	24011.6	22169.7	25727.8
GAVDIPAAASFK	P23514	Bifunctional purine biosynthesis protein ATIC	22442.3	18401.7	16845	10394.3	19956.3	18925.9	14579.7	15076.8	19682.6	17224.9	17885.8	20204.1	14526.5	16256.5	20152.7	19234.4
SLFSNIVTK	P23562	Bifunctional purine biosynthesis protein ATIC	11542.3	8367.34	9024.36	6598.5	9248.91	12209.3	9993.32	7632.18	9705.52	8689.27	8636.99	36092.4	7804.86	11767.2	12448.8	28698.8
LDFNLIR	P23565	Bifunctional purine biosynthesis protein ATIC	8766.14	5169.1	6944.65	3335.38	7353.03	8318.22	5835.71	6295.14	5792.52	4639.69	6775.56	8844.93	4958.33	10574.4	9316.76	6689.83
ALFEEVPELLTEAEK	P23711	Bifunctional purine biosynthesis protein ATIC	11587.6	2576.58	5368.79	1025.24	5486.79	10204.3	2863.69	6694.48	7958.04	2069.23	7252.76	8727.23	2735.48	11776	23741.9	3193.07
EVSDGIVAPGYEEEALK	P23928	Bifunctional purine biosynthesis protein ATIC	18664.5	11936.6	12541.2	7061.49	14933.9	16081.1	12035.2	18251.6	15334.7	11064.8	14836.4	17749.3	16148.5	20581.8	29777.7	24565.4
SGVAYIVAPSGSTADK	P23965	Bifunctional purine biosynthesis protein ATIC	10218	9051.14	9181.14	7321.7	8829.83	9046.62	7887.89	9020.36	6707.62	9826.94	10017.9	8077.87	8070.72	10829.4	9639.96	7615.16
HVSPAGAAVGVPLSEDEAR	P23978	Bifunctional purine biosynthesis protein ATIC	9037.09	9479.42	8563.66	9075.11	8821.16	9677.61	9569.4	9363.8	10552.5	11163	7549.55	9064.41	8919.47	9165.8	7949.39	11271.4
AFTHTAQYDEAISDYFR	P24049	Bifunctional purine biosynthesis protein ATIC	4176.29	2734.49	2576.22	2534.95	N/A	N/A	3198.92	2188.06	1657.67	2437.4	2565.21	2665.83	2207.5	2990.93	N/A	2849.15
VVVCNLYPFVK	P24050	Bifunctional purine biosynthesis protein ATIC	991.715	N/A	900.037	967.672	1388.94	844.142	998.539	N/A	795.732	1243.13	1075.81	N/A	983.734	N/A	2333.88	1351.91
DVSELTGFPEMLGGR	P24090	Bifunctional purine biosynthesis protein ATIC	3678.8	2682	5662	2463.93	8422.55	7871.53	3616.14	6394.17	3716.71	2158.39	8506.58	7100.37	4724.54	8816.97	13245.8	5266.15
DLIVATIAVK	P24155	Bifunctional purine biosynthesis protein ATIC	2691.78	3601.54	1654.49	1505.55	N/A	2044.95	2595.98	N/A	N/A	2752.17	3000.86	2936.91	1208.04	1747.02	N/A	2237.93
ALTSELANAR	P24268	Moesin	8385.66	6347.57	6538.56	5569.57	7553.58	7434.78	7039.09	6330.02	5214.83	6946.55	6382.1	8690.63	6161.28	6844.82	8083.12	6523.37
EDAVLEYLK	P24329	Moesin	6459.28	4941.55	4482.79	4142.62	6818.04	6280.19	5729.1	4382.46	6692.19	5369.15	6011.08	6281.45	5614.07	7269.09	8516.66	6297.57
FYPEDVSEELIQDITQR	P24368	Moesin	1044.26	719.768	1168.44	681.969	1970.71	N/A	1557.29	2194.27	1327.53	1159.46	1806.26	1925.92	1546.99	1942.09	N/A	1561.58
TLLSDPTYR	P24623	Stress-induced-phosphoprotein 1	33807.7	30602.2	31668.5	25482.2	36531.3	31150.6	27651.9	26959.6	35755.8	27942.3	30912.8	26410.3	30719.1	31580.3	34621.8	38147.4
AAALEFLNR	P24942	Stress-induced-phosphoprotein 1	17812.4	12819.8	12436.5	8972.02	12876.7	13815.7	11599.6	10912.1	12196.8	11134.8	12037.1	13351.8	9503.74	15511.8	15714.2	14017.1
LDPQNHVLYSNR	P25113	Stress-induced-phosphoprotein 1	1601.89	1198.66	1578.72	1123.95	1668.47	1816.43	1628.44	948.555	1299.83	871.448	954.646	1050.38	876.998	N/A	934.474	840.419
ALSAGNIDDALQCYSEAIK	P25235	Stress-induced-phosphoprotein 1	5514.58	1206.94	1298.7	751.439	1803.39	2580.99	888.815	2649.93	3910.92	989.614	1032.69	2675.43	2228.86	2559.52	3998.15	4075.22
DPQALSEHLK	P25286	Stress-induced-phosphoprotein 1	3162.08	5150.99	4492.36	1874.41	3321.38	5023.5	3853.87	5241.58	5561.39	3561.16	4241.69	4550.02	5557.31	6862.06	7057.84	6642.98
LAYINPDLALEEK	P25809	Stress-induced-phosphoprotein 1	23707.8	17751.4	18894.7	10963.9	22978.2	22544.2	13295	18030.9	26435.1	13740.9	18541.9	20644.6	17356.6	24183	33127	25779.3
ELIEQLQNKPSDLGTK	P25886	Stress-induced-phosphoprotein 1	6460.65	6268.34	6175.24	2594.8	N/A	6707.88	6062.67	5421.17	8043.33	4576.64	6046.04	5817.23	5831.47	7041.87	6599.13	5751.56
DCEECIQLEPTFIK	P26051	Stress-induced-phosphoprotein 1	6487.22	2939.67	2569.83	1385.66	2835.89	4018.82	1883.96	2982.03	8981.26	2144.48	1732.51	3965.25	2621.5	3875.29	8440.71	3875.95
LMDVGLIAIR	P26284	Stress-induced-phosphoprotein 1	2207.08	1743.82	4117.55	2386.31	2615.82	2816.12	1385.87	N/A	2388.25	1780.93	4980.52	N/A	1889.34	5399.96	N/A	3496.48
SPSLLQSGIR	P26453	Myb-binding protein 1A	3809.44	4384.57	4872.67	4878.88	6549.17	7538.81	4609.19	3721.05	4550.36	5289.78	5522.92	5905.44	5368.13	5818.68	6817.82	5644.88
LITGLGVGR	P26772	Myb-binding protein 1A	4409.78	4277.85	5204.12	3686.39	5401.79	5574.8	4256.82	4209.64	4999.18	4508.79	4782.69	4573.57	3834.22	4951.2	4458.63	4194.32
LPDVALNLLR	P27139	Myb-binding protein 1A	1089.42	811.429	569.168	655.97	1482.79	1947.21	778.131	1000.94	788.142	788.689	1301.64	816.582	1233.72	2044.45	N/A	592.095
EVLEEGLLK	P27274	Myb-binding protein 1A	1419.75	2777.76	1766.34	1810.38	2039.34	2530.34	1983.18	N/A	N/A	2013.6	1570.83	2350.14	2681.06	2413.34	1292.98	2546.84
DEAVVEQIAR	P27605	Myb-binding protein 1A	N/A	3299.73	N/A	2935.49	2009.25	3817.4	3520.64	2565.36	N/A	2894.5	3035.22	3455.16	3545.44	2215.63	N/A	1488.6
ALDLIEVLVTK	P27615	Myb-binding protein 1A	N/A	665.689	377.795	381.749	704.89	2316.43	817.069	836.165	N/A	376.289	1638.29	1125.55	449.082	2119.51	N/A	828.436
ILEVHVDK	P27653	DnaJ homolog subfamily A member 2	2777	2608.81	3254.23	2230.09	3167.9	2507.91	2189.45	2841.78	2130.53	2302.99	2320.32	2305.04	2215.62	3397.1	2800.67	2902.39
VSLEDLYNGK	P27791	DnaJ homolog subfamily A member 2	5435.34	4595.42	3968.76	N/A	4625.63	6105.85	4852.22	N/A	6257.38	4454.18	N/A	N/A	4038.5	3540.76	5026.35	4131.75
EISFAYEVLSNPEK	P27867	DnaJ homolog subfamily A member 2	4348.32	2590.36	1658.48	743.74	1141.23	1013.9	1816.6	2199.72	1356.13	1786.21	2120.11	1782.28	2092.18	2674.01	2516.95	3400.73
ENTELTQPLR	P27881	Afadin	2823.05	2430.3	2885.09	2236.1	2138.22	1864.12	2543.22	1384.33	2045.43	1821.09	2282.72	3017.93	1914.17	2072.35	3038.95	1124.62
GGAVVDEGPTGIK	P27952	Monocarboxylate transporter 4	11154.8	9091.86	9345.39	7804.78	10086.5	9028.23	7429.89	10289.1	7361.9	7391.72	9749.05	11004.6	9733.19	10386.4	11739.7	11069.5
ALLEVLGR	P28023	Hydroxyacylglutathione hydrolase, mitochondrial	22207	14099.7	15079.9	8203.17	15686.9	16944.9	14526.2	15011.3	27491.1	11513.5	14329.7	15403.5	11144	17699.7	21746.8	17724.5
AVAEVLVR	P28064	Endophilin-A2	8060.17	7037.81	8746.73	6342.74	7802.62	7593.72	8353.54	8805.74	9812.22	6320.48	7302.51	8453.49	6087.87	8437.4	8438.58	7006.2
EFVAVTGAEEDR	P28073	NSFL1 cofactor p47	3868.87	2917.7	4907.3	2756.93	3227.46	2439.33	2641.51	2620.97	1962.03	3139.6	1789.53	1657.92	2982.19	2537.62	3359.05	2365.59
SPNELVDDLFK	P28075	NSFL1 cofactor p47	N/A	1375.01	971.45	762.255	N/A	814.073	498.88	1467.92	951.502	793.186	1248.41	1221.06	1267.68	3187.08	2849.64	N/A
LGAAPEEESAYVAGER	P28480	NSFL1 cofactor p47	1834.99	1230.77	1720.05	1303.75	1285.59	1025.91	1149.28	1321.5	1170	933.389	2681.14	1105.24	1470.32	1281.78	1761.3	932.482
EANLLNAVIVQR	P28572	NSFL1 cofactor p47	5453.92	4008.03	2265.71	1138.02	3794.96	4747.55	3182.78	4592.05	4673.15	2816.99	2584.59	4895.89	3474.87	5093.91	6934.65	3873.63
GPTITLTQIV	P29066	V-type proton ATPase subunit S1	2086.16	1295.32	1778.39	994.021	2175.37	4000.07	2472.27	3724.61	1696.51	1368.5	4742.43	3530.16	2395.05	3279.93	6942.87	2828.51
DPVLSGAIATK	P29147	Choline/ethanolamine kinase	3124.2	4025.66	3626.15	2921.98	3274.64	4061.34	3856.96	N/A	3035.56	3402.87	3687.95	N/A	3309.68	N/A	2599.72	3403.25
VILTAEVSGGSR	P29266	Sortilin	1512.19	1620.77	1393.78	1871.08	1451.35	1399.34	2939.72	1849.68	1617.68	1724.79	1148.22	1682.55	2178.59	307.143	218	1782.88
IQVLPYK	P29314	Xaa-Pro aminopeptidase 1	9207.41	7687.54	8691.5	7367.14	10592.5	9692.84	9259.26	8761.46	9160.47	7811.02	10637.4	8988.25	8198.63	10542.1	10710.9	9975.57
TLCADLSPR	P29315	Xaa-Pro aminopeptidase 1	10024.2	9031.65	8557.47	7032.1	9188.12	10187.7	8304.4	8957.15	8794.85	8297.24	8992.81	9586.67	7817.91	7006.53	8397.92	8944.73
ASYAVSEAIPK	P29348	Xaa-Pro aminopeptidase 1	5465.88	4606.61	5723.27	4989.77	5410.13	5804.09	5788.88	5039.75	5560.74	4099.24	6087.71	5023.38	5204.32	5024.15	6248.56	6086.89
GHLLDSFAR	P29410	Xaa-Pro aminopeptidase 1	3955.95	4243.26	4466.71	3864.87	3061.97	5034.86	4368.38	3227.46	4545.58	5358.7	2964.09	3425.45	4962.2	2963.55	N/A	5431.51
GSLTFEPLTLVPIQTK	P29418	Xaa-Pro aminopeptidase 1	16169.7	6338.07	12291.8	1743.09	13517.5	19837.9	9405.98	12424.2	17926.4	4996.15	11243.9	4739.44	9581.08	20731.9	62811.7	16591.6
IENVVLVVPAK	P29419	Xaa-Pro aminopeptidase 1	9322.23	11506.4	9806.91	5476.84	8361.78	9205.16	8672.36	7311.33	9150.66	8562.12	7935.72	9703.61	8224.94	8396.93	9380.92	8649.18
QVAFDFTK	P29457	Phosphatidylinositol-binding clathrin assembly protein	1551.41	1348.5	1232.4	1424.13	1337.44	1670.11	1620.57	N/A	N/A	1597.64	1367.5	1503.18	1258.52	1290.89	975.849	963.691
GDYAPILQK	P29975	Dipeptidyl peptidase 3	7919.55	7420.92	9765.94	7385.57	8151.39	6754.26	8956.75	7404.86	7188.47	8862.44	8709.78	6390.59	7936.2	9125.35	10276.6	9264.37
LVASAEQLLK	P29994	Dipeptidyl peptidase 3	9055.84	7024.75	8590.12	5388.17	8008.53	8118.46	6996.11	7050.27	6324.39	7844.9	7061.36	8882.48	6774.1	9017.54	9651.17	8263.85
FVPNLPK	P30009	Dipeptidyl peptidase 3	10914.5	9097.38	8957.75	7203.48	9803.38	10620.5	9115.57	7745.53	10448.4	7335.95	8845.21	10228.5	7850.46	N/A	9131.37	N/A
FSTIASSYEECR	P30349	Dipeptidyl peptidase 3	1533.29	1595.99	1283.07	2073.81	1898.63	N/A	1829.96	1921.36	N/A	2138.15	1505.46	1375.04	2036.88	1172.93	2464.74	1989.32
YSLIDPASAPELLR	P30427	CAP-Gly domain-containing linker protein 2	N/A	1785.56	1478.91	814.701	2307.08	N/A	1687.51	1523.96	N/A	1223.67	2563.13	1574.91	2008.19	3613.84	7356.57	1778.9
GLAPEQPVTLR	P30713	Acyl-coenzyme A thioesterase 2, mitochondrial	N/A	2028.97	2035.77	1801.75	1542.06	2888.6	3313.93	2891.93	N/A	2083.99	1362.56	2996.22	2011.15	2496.78	N/A	2547.52
ELPDVLER	P30835	Prolyl endopeptidase	2050.4	3764.87	3393.31	2663.29	2888.77	2974.89	2787.64	2628.22	3043.13	3100.73	2907.86	2342.77	2960.88	3619.5	3595.72	4026.55
LINIDFTDPDESK	P30839	Prolyl endopeptidase	2530.22	2909.47	2746.1	1871.3	3449.83	3642.74	2817.7	2836.42	N/A	2770.79	2978.51	4622.64	2598.13	3894.61	3683.83	3165.25
VTVVDVNEAR	P30904	UDP-glucose 6-dehydrogenase	4289.56	3812.37	4530.45	3351.02	3943.48	3450.67	3361.63	2715.75	3209.9	3723.03	3940.07	4288.01	3109.41	3021.78	3083.95	3407.79
SEVVVQFPCSDR	P31000	Retinoid isomerohydrolase	5419.68	N/A	1481.18	866.478	2675.19	1487.5	1391.23	2278.41	N/A	841.116	3875.04	N/A	3198.34	1086.38	2222.05	1831.11
VLQTQLDTLR	P31016	Tripartite motif-containing protein 3	N/A	N/A	3255.99	2709.3	3354.69	3940.91	3026.28	3039.38	2548.81	3700.02	2370.11	2808.97	2638.06	3050.72	3033.18	1596.95
DLAPIGIR	P31044	3-hydroxyacyl-CoA dehydrogenase type-2	6817.88	4493.51	4396.87	3286.1	6548.36	4570.04	4785.17	6147.4	5301.96	4199.7	5085.17	6279.99	4002.99	5727.88	5593.96	6208.04
LGGNCIFAPANVTSEK	P31399	3-hydroxyacyl-CoA dehydrogenase type-2	3224.4	3557.96	2546.29	2422.7	2390.13	3018.36	N/A	3169.19	2812.48	2465.8	N/A	N/A	2780.98	1881.41	3330.58	2783.82
NFLASQVPFPSR	P31421	3-hydroxyacyl-CoA dehydrogenase type-2	4573.82	2846.83	3022.02	2074.68	3166.44	3558.86	3486.89	3294.8	3563.66	2939.53	2998.68	3033.34	3088.22	4014.86	3596.53	3287.29
GLVAVITGGASGLGLSTAK	P31643	3-hydroxyacyl-CoA dehydrogenase type-2	1131.92	803.572	1389.11	1086.59	1145.36	1007.1	2022	936.161	4109.86	1588.3	1561.43	N/A	1562.91	2704.14	N/A	1657.04
LGYISVVDTLK	P31646	Ankyrin-3	7365.65	4434.62	6048.82	3663.77	5501.49	5391.62	4686.72	5954.48	6129.45	4166	7887.5	7263.04	4601.36	9388.01	10626.3	5369.21
VGLQAQPVPEETVK	P31647	Ankyrin-3	2808.95	3077.45	2873.67	2588.22	3673.35	2971.93	2491.58	2992.69	3647.54	2952.11	3212.27	3567.95	3945.46	3224.9	2635.16	2231.42
DFPQYFAVVSR	P31977	Ankyrin-3	10636.6	5830.76	5036.68	3217.84	9701.26	12315.2	4607.93	6207.65	11632.5	4354.26	7928.01	6274.48	6161.1	8231.6	12742.8	7328.02
ATFSPIVTVEPR	P32089	Ankyrin-3	2340.73	1956.71	2481.1	2217.91	3184.9	2249.32	2761.55	2397.45	2844.08	2518.02	3016.13	2807.24	2982.71	N/A	2968.01	2461.88
VNAPLLSQR	P32198	Inward rectifier potassium channel 13	2859.13	1972.37	2292.76	2945.64	N/A	2938.09	2443.72	2285.74	1470.61	2760.73	3174.33	2741.96	3422.92	2434.51	N/A	2065.41
FTDLAVVAHK	P32551	Inward rectifier potassium channel 13	1371.97	1137.75	1422.81	1234.08	N/A	1550.87	1515.95	1306.97	N/A	1054.39	1451.15	1286.7	1474.85	1512.68	1773.62	1200.51
LLLTTPAK	P33124	Slit homolog 1 protein	15059.5	8355.46	4358.11	4683.71	4943.72	5778.62	7381.83	5898.9	16581.2	5468.69	N/A	6936.92	4564.45	N/A	5476.83	5330.7
QLVALLR	P33578	Epsin-1	5673.27	4530.91	4738.44	3207.81	5343.51	5284.91	4606.68	3870.09	3235.02	3890.53	3178.06	3066.09	3909.71	4720.69	5971.95	3860.43
TALPTSGSSTGELELLAGEVPAR	P34058	Epsin-1	2947.79	3377.41	5042.72	1785.87	4012.56	4506.8	3324.46	3671.28	2367.18	3462.8	2231.27	4265.64	3130.51	1999.79	8545.07	2956.29
GVPVISVK	P34064	Scaffold attachment factor B1	1517.89	2707.71	844.82	2413.15	2412.25	2170.27	1491.42	1520.45	4543.76	1685.07	2973.6	1637.76	1977.89	901.71	1058.26	1480.08
FEFTPGR	P34067	STE20/SPS1-related proline-alanine-rich protein kinase	5819.28	5997.25	6816.79	5148.58	5609.1	5734.86	6833.77	4838.62	4577.68	5372.21	4970.6	5997.85	5784.85	N/A	6824.57	5717.38
DVSVPVAEIK	P34926	Phosphofurin acidic cluster sorting protein 1	7057.47	5117.29	6060.26	4012.38	6370.47	5022.87	5557.44	4965.7	N/A	4734.54	5140.6	5048.14	5685.56	5069.03	6763.96	5935.72
QSLTADPVVK	P35213	Heat shock 70 kDa protein 4	25976.7	23952.1	26008.2	20374.9	28340	25012.4	24233.6	24384	21590	21958.6	26687.4	29891.2	24445.1	26828.5	28168	26060.9
AFSDPFVEAEK	P35234	Heat shock 70 kDa protein 4	52571.3	43292.5	47641.7	29041.6	51091.3	48262.4	39420.1	44212	48412.5	38758.3	54448.3	53139.8	37289.7	48975.8	55442.4	52629.3
QDLPALEEKPR	P35284	Heat shock 70 kDa protein 4	13998.5	10393.6	15774	10980	14756.4	14590.6	14270.3	12746.8	12957.3	11742.9	13601.1	17305.5	13233	13951.4	14499.2	13858
SNLAYDIVQLPTGLTGIK	P35427	Heat shock 70 kDa protein 4	15715.9	7317.06	13041	4550.11	15642.6	20141.3	9865.97	9216.74	15578.1	7290.13	19651.9	11179.9	11889.2	19817.6	42178.9	15923.5
CTPACVSFGPK	P35435	Heat shock 70 kDa protein 4	14836.4	13600	11860	9629.86	14121.4	12642.1	12789.9	10611.1	11392.1	13509.3	12247.3	13890.3	13136.1	12048.9	14611.7	15269
EDIYAVEIVGGATR	P35446	Heat shock 70 kDa protein 4	17132.4	14165	12080	9050.42	13449.1	14824	12099.5	15395.6	14519	8833.07	12855.1	18261.4	10962.2	25964.2	14555	15162.2
EFSITDVVPYPISLR	P35465	Heat shock 70 kDa protein 4	71977	8707.23	38565.5	5125.33	24101.7	48795.8	31988.8	18435.7	50724.5	8489.23	27598.9	15911.3	16109.3	30540.3	99860.5	47495.8
LKETAESVLK	P35559	Heat shock 70 kDa protein 4	724.774	1722.82	1245.67	728.169	2529.8	932.923	1135.81	1932.97	1552.69	1177.8	1738.6	2219.45	841.606	1303.11	2287.42	875.539
ELSTTLNADEAVTR	P35565	Heat shock 70 kDa protein 4	22818.8	20829.3	22063.9	10954.5	18549.1	22259.1	10098.7	23578.4	22972.5	10096.1	10207.6	26422.1	11968	23884.3	24370.6	20403.6
VLATAFDTTLGGR	P35704	Heat shock 70 kDa protein 4	72254.9	53514.8	61302.7	18773.7	69274.7	66226.6	62424.1	56183.9	78710.9	42542.2	57858.5	70173.5	51079.8	65435.6	83369.7	61296.7
AGGIETIANEYSDR	P35815	Heat shock 70 kDa protein 4	117786	89114.5	96819.4	73001.5	114935	101944	83477.8	93992.2	100887	75083	97531	91268.9	93499.2	106640	137603	108466
LFEELGK	P36506	Heat shock 70 kDa protein 4	30003.1	22820.6	31262.2	22341.6	29992.9	32953.1	26660.8	24498	21650.4	19861.3	29360.2	32697.9	23851.5	32176.9	31481.9	24965.1
MQVDQEEPHTEEQQPQTPAENK	P36510	Heat shock 70 kDa protein 4	3297.27	3763.03	3094.7	2256.16	4079.79	7248.26	2537.55	3707.73	2377.53	1982.28	6034.68	3667.53	2409.61	8879.51	7670.05	2864.48
EMLGLYTENEGK	P36876	Heat shock 70 kDa protein 4	17454.4	24192.6	25725.8	24163	25127.3	23715.9	12152.7	26337.2	13939.1	18697.5	33215.1	21349.2	23066.5	30630.7	22114.9	21552.5
FLEMCDDLLAR	P36970	Heat shock 70 kDa protein 4	2824.31	4316.32	3932.6	3887.25	4497.47	4454.23	3437.15	4832.93	2770.8	6199.95	6237.9	7128.36	4031.64	4821.75	4050.81	3070.38
FVSEDDRNNFTLK	P36972	Heat shock 70 kDa protein 4	1076.2	2839.97	3246.95	4572.09	3139.25	2301.53	2926.06	3193.65	2560.94	3652.4	2774.9	1848.89	3256.05	N/A	2063.38	2597.4
KPVVDCVVSVPSFYTDAER	P37136	Heat shock 70 kDa protein 4	18569.6	14215.6	15705.5	11049.8	13194.6	12863.4	17834.7	16482.7	22844.9	11016.3	16252.7	18102.7	14041.7	15049.3	18156.9	18801.7
SVMDATQIAGLNCLR	P37285	Heat shock 70 kDa protein 4	3451.24	2520.94	2601.85	1588.65	3591	2783.93	2403.43	3584.43	2379.56	1364.83	4204.51	4120.79	2223.17	4192.68	5999.6	3798.16
NAVEEYVYEMR	P37397	Heat shock 70 kDa protein 4	4509.91	4975.92	4737.84	4104.72	6624.92	4084.32	2561.61	4972.57	4170.43	3128.65	4885.48	4690.69	6159.88	10958.3	8108.86	5561.54
CIIQMQGNSTSIINPK	P37805	Kinesin-like protein KIF1B	10608.1	6641.76	4273.97	4450.65	N/A	5078.21	4903.2	5975.02	7741.85	3849.12	2808.99	5691.54	5210.65	4600.5	8210.56	9613.72
VSTAVLSITAK	P37996	26S proteasome non-ATPase regulatory subunit 1	10887.6	8704.44	11747	12213.1	11770.8	10705.3	12870.5	10870.7	14286.7	11685.4	9826.93	10704.8	11367.4	13538.4	9983.08	9198.35
QAIGIALETR	P38062	26S proteasome non-ATPase regulatory subunit 1	10786.6	9087.34	10167.8	7307.45	9549.68	9804.52	9463.14	9051.11	10250.1	8812.34	9200.45	8778.66	9239.35	12072.9	10594.4	9248.82
QFAALVASK	P38650	26S proteasome non-ATPase regulatory subunit 1	5836.75	4675.45	5012.69	4244.48	5217.62	4386.87	5593.54	4362.67	4685.45	4492.43	4628.18	4442.95	5137.02	5205.41	4428.93	4285.02
AAVESLGFILFR	P38652	26S proteasome non-ATPase regulatory subunit 1	3887.44	1744.52	2229.52	877.374	3089.74	2177.93	2488.02	2321.14	3716.07	1272.35	3065.17	2095.31	1359.16	4467.31	N/A	2655.34
LLHVAVSDVNDDVR	P38656	26S proteasome non-ATPase regulatory subunit 1	4264.05	4233.97	2879.9	3668.92	4266.6	4337.95	4116.2	5556.43	2849.01	3779.19	4163.77	6136.44	3227.89	5869.73	4804.19	4280.4
TVGTPIASVPGSTNTGTVPGPEK	P38659	26S proteasome non-ATPase regulatory subunit 1	6415.86	1194.29	1941.61	1432.67	2202.83	N/A	2090.84	2036.75	5349.53	1860.31	1791.7	2402.54	1784.24	N/A	3462.25	3931.05
FTATASLGVIHK	P38718	26S proteasome non-ATPase regulatory subunit 1	506.634	N/A	2732.29	1410.51	981.531	1544.36	2095.73	735.151	1865.1	1263.63	1884.46	N/A	1137.7	2419.85	N/A	1947.28
QDVYDLLK	P38983	26S proteasome non-ATPase regulatory subunit 1	2182.07	2490.91	2366.06	2167.42	2246.96	2249.44	2402.2	1629.39	N/A	2743.07	2632.15	2256.74	2255.47	N/A	2620.68	1885.08
DTSEDIEELVEPVAAHGPK	P39069	26S proteasome non-ATPase regulatory subunit 1	10454.1	6528.64	8436.06	3913.48	11400.1	11698.2	8400.03	11036	9292.58	4851.65	10895.2	14695.2	8006.68	14200	26045.4	10271.1
DGLILTSR	P40112	Parkinson disease protein 7 homolog	130919	105761	101954	77224.8	88173.3	104685	86254.8	90504.9	105473	68488.3	97380.7	102414	77784.7	114229	99989	100373
ALVILAK	P40241	Parkinson disease protein 7 homolog	76086.8	51781.8	60230.1	42756.1	48529	57075.3	53450.3	63620.9	70067.3	33394	64593.8	67488.6	45384.9	77807.1	97187.2	61410.2
DVVICPDTSLEEAK	P40307	Parkinson disease protein 7 homolog	186879	140148	120610	94354.6	141793	127267	104755	126544	150315	83144	142404	146244	103126	120179	154707	156628
TQGPYDVVVLPGGNLGAQNLSESALVK	P40329	Parkinson disease protein 7 homolog	17542.3	15066.2	18253.6	6540.08	19749.8	24568.5	15870.4	15801.3	17771.8	4316.14	22517.7	21305.4	11468.4	18342.4	41822.3	19577
GAEEMETVIPVDIMR	P41123	Parkinson disease protein 7 homolog	17446.2	12431.5	11553.9	6680.86	11510.9	11195.6	6978.36	23114.8	9231.16	4487.15	33789.5	11467.9	12547.9	30841.3	21336	22128
FTVFNSK	P41498	Embigin	N/A	2038.16	N/A	2673.49	3702.35	3295.58	2852.03	1245.89	N/A	4412.74	2516.74	1689.38	2398.86	978.116	2207.21	N/A
LNMPLPPISR	P41499	Putative Dol-P-Glc:Glc(2)Man(9)GlcNAc(2)-PP-Dol alpha-1,2-glucosyltransferase	N/A	7846.39	17316.7	10351.4	14934.7	13769.9	10287.1	11956.5	N/A	13621.4	13941	8787.86	10486.6	14535.7	20178.5	N/A
NEELGQLYR	P41542	Pyridoxine-5'-phosphate oxidase	2901.09	4687.55	2769.2	3341.35	N/A	2916.46	3320.23	2135.02	5374	4168.72	3011.6	N/A	3888.31	1911.22	2615.68	3720.27
VFLLAGR	P41562	Tubby protein homolog	18231.5	12729.7	13848.7	9477.83	14681.7	17195.4	13570.8	11372.3	15259.7	7333.36	16875.8	13214.5	11806.2	11695.4	13021.4	16002.4
AFYDAIK	P41565	Gamma-aminobutyric acid type B receptor subunit 2	27489	14729.2	1596.46	12828.5	N/A	21930.9	17417	22143	12580	12266.7	15469.9	23805.9	11637.3	31884.7	20058.9	9861.6
LGPLLDVLADSR	P42123	Mannosyl-oligosaccharide glucosidase	3547.69	1482.25	1649.76	917.213	1838.18	1993.77	1341.63	1733.37	3331.67	1209.55	2085.17	2436.43	1595.76	2899.39	N/A	1002.47
ITIPYGK	P42346	Nuclear RNA export factor 1	N/A	2217.78	1993.44	2561.3	2581.12	1452.66	2491.06	2357.03	1676.63	2439.74	2406.13	2039.17	2009.77	N/A	N/A	2286.44
ILNLSGNELK	P43138	Nuclear RNA export factor 1	2144.96	2584.86	3368.4	2577.58	2461.07	3135.26	2862.12	N/A	2159.81	2456.37	2315.52	N/A	3065.74	3268.81	N/A	2555.1
ENFSCLTR	P43244	Malate dehydrogenase, cytoplasmic	174196	154893	171230	116236	144575	156641	141796	188209	195297	116885	155703	212135	127093	178708	167389	163892
EVGVYEALK	P43425	Malate dehydrogenase, cytoplasmic	78867.8	72832.1	76890.9	64461.4	65141.9	74350.8	73708.6	75744.3	78229.4	81963	85734.4	86904.9	58549.1	84826	88057.9	69557.9
ETAFEFLSSA	P45479	Malate dehydrogenase, cytoplasmic	9044.73	15392.6	17791.5	5401.11	26034.6	35662.4	15469.5	15639.7	19416.4	9941.6	35959.4	26606.5	12019.6	19621.6	58038.1	21509.8
VIVVGNPANTNCLTASK	P45592	Malate dehydrogenase, cytoplasmic	390214	131605	153105	104829	156788	168843	133073	141200	204124	106164	131114	164568	125858	151856	168444	162530
GEFITTVQQR	P45953	Malate dehydrogenase, cytoplasmic	733415	655595	364141	207685	293665	319104	266628	310756	644714	257374	269984	365180	523114	684864	720290	707957
DLDVAVLVGSMPR	P46101	Malate dehydrogenase, cytoplasmic	32025.5	11573.6	16991.8	10248.9	34694.6	17412.7	17878.9	29585.4	20153.3	7930.35	31768	33746.8	7070.37	27072.4	26674.2	12133.6
FVEGLPINDFSR	P46413	Malate dehydrogenase, cytoplasmic	439280	419579	346380	153713	425682	504059	253567	413159	468446	208499	405849	479489	246682	413780	664614	474739
AIFLADGK	P46462	Coronin-1B	11563.3	8438.65	8667.08	7651.13	7481.31	11405.1	8535.45	7437.08	9019.98	6934.96	8163.37	8015.57	8945.05	10271.2	8942.47	8827.96
IEQIEAGTPGR	P46844	Thioredoxin reductase 1, cytoplasmic	5951.37	5036.41	4712.23	3425.38	4657.28	4557.48	4314.89	5329.78	4314.37	4104.52	3912.68	5243.58	4481.85	5863.62	6354.08	4958.14
YLGIPGDK	P47198	Thioredoxin reductase 1, cytoplasmic	32577.2	24421.4	25450.5	N/A	19580.3	33172.1	28706.5	20529.2	27662.7	20286.6	26782.8	N/A	20148.8	28448.4	N/A	26504.3
LELTPVAIQAGR	P47245	Thioredoxin reductase 1, cytoplasmic	8583.85	6984.5	7089.65	5250.1	7141.82	8925.57	7011.49	7514.91	7209.79	5806.8	7218.51	8172.19	6853.35	8623.62	11016.7	7801.58
VMVLDFVTPTPLGTR	P47709	Thioredoxin reductase 1, cytoplasmic	1923.54	1433.29	2768.83	763.045	2688.01	2509.34	1378.43	2642.34	2102.33	1237.41	4807.84	1585.87	2280.43	2446.57	N/A	2003.49
FAVFGLGNK	P47727	NADPH--cytochrome P450 reductase	14548.6	8652.08	9339.99	6747.06	13872.5	14083.2	10456.1	8082.35	16219.3	9046.66	7496.86	9468.07	8948.53	13956.4	11469.8	10940.8
GMSADPEEYDLADLSSLPEIDK	P47728	NADPH--cytochrome P450 reductase	1920.97	N/A	1570.49	721.085	3386.83	2238.18	1784.38	3120.11	799.003	537.406	2687.27	3056.12	2243.85	N/A	N/A	2180.15
NPFLAAVTANR	P47819	NADPH--cytochrome P450 reductase	21529.6	16318.6	14276.9	9382.2	16303.9	16510.1	15292.3	13393.8	19132.4	13432	15884.2	13685.6	14325.1	16972.5	19661.9	16603
EVGETLLYYGCR	P47858	NADPH--cytochrome P450 reductase	2875.93	3308.85	1533.23	2201.62	2212.39	1418.25	2914.71	2913.12	3036.94	2719.7	2003.52	2081.36	2858.69	1916.8	N/A	2068.06
VVLPMELPIR	P47860	Cytochrome c oxidase subunit 2	2882.33	4765.19	6962.09	2692.37	3785.13	3038.13	1106.89	3509.24	1844.41	4237.37	9311.82	4724.93	3168.91	4869.61	N/A	3465
VGASFLQR	P47942	Aspartate aminotransferase, mitochondrial	372851	290602	325110	237079	328086	377709	294866	317767	342960	244126	326490	365758	254427	342390	355648	346655
VGAFTVVCK	P48004	Aspartate aminotransferase, mitochondrial	381649	265871	278068	249427	330111	371827	279243	303097	324319	228421	311074	337271	276527	362095	362189	365845
EYLPIGGLADFCK	P48037	Aspartate aminotransferase, mitochondrial	55437.1	40898.1	42166.7	16078.2	33766.4	55412.9	32146.6	44549.4	62428.5	29099.3	51522.2	45696.6	34381.6	71419.1	115136	44895.2
FVTVQTISGTGALR	P48450	Aspartate aminotransferase, mitochondrial	62567.9	45454.8	47035.3	32075.8	43750.7	53263.6	48856	44299.7	71322.8	37783.4	43041.8	44858.7	42440.8	48514.5	53991.8	52035.3
MNLGVGAYR	P48500	Aspartate aminotransferase, mitochondrial	18555.2	17000.8	18741.1	15899.2	15639.7	18811.4	13217.7	17012.3	18051.8	16296.5	19608.8	15415.3	16597.3	19373.9	12747.1	14420.9
QWLQEVK	P48679	Aspartate aminotransferase, mitochondrial	5704.24	5280.94	7227.2	5799.26	3925.32	6687.09	9094.48	6705.57	10364	6366.96	1815.58	4320.64	7966.76	2925.94	4210.67	5437.06
TCGFDFSGALEDISK	P48721	Aspartate aminotransferase, mitochondrial	135531	44295	48231.5	15916.7	59677.1	60540.5	34586.9	56327.2	111950	26287.5	49781.6	60994.5	38933.1	75100.9	255513	53657.1
IAATILTSPDLR	P49088	Aspartate aminotransferase, mitochondrial	488220	179191	184449	109592	212365	230164	169631	209026	479618	125248	193699	233675	299023	459313	567309	229405
DDNGKPYVLPSVR	P49134	Aspartate aminotransferase, mitochondrial	47815.7	24633.4	32766.9	17538.7	40063.3	44308.7	23842.1	19390.7	33256.5	20501.7	19097.3	41207.9	20978.4	21625.5	28351.1	25406.1
ASAELALGENSEVLK	P49242	Aspartate aminotransferase, mitochondrial	148483	81542.3	87785.7	59006.4	114694	71613.9	67917.7	86121.3	116392	62996.7	70510.6	184578	63312.6	177434	174433	156609
KQWLQEVK	P49432	Aspartate aminotransferase, mitochondrial	N/A	546.071	689.114	644.403	510.577	660.824	1286.53	806.408	661.083	829.343	270.646	669.843	766.135	433.399	355.823	556.375
NLDKEYLPIGGLADFCK	P49655	Aspartate aminotransferase, mitochondrial	39316.8	32855.7	24987.9	6882.46	40842.1	35853.6	23347.8	27224.8	54739.7	8143.37	27104.7	30817.3	12041.7	35234.9	50050.3	33794.5
EFSVYMTK	P49793	Aspartate aminotransferase, mitochondrial	19978.1	20269.4	29715.5	25723.8	33589.3	25921.5	15734.7	25409.6	14828.9	10317.7	41359	19429.2	19130.8	31092.5	25692.2	23236
LGEHNINVLEGDEQFINAAK	P49803	Anionic trypsin-1	886500	815102	496476	262925	867919	1.12834e+06	978326	1.08142e+06	1.46919e+06	375079	816075	1.7119e+06	682009	931678	1.13897e+06	837900
GENHCGIESEIVAGIPR	P49805	Cathepsin B	7295.69	7007.48	5981.82	5437.62	6066.14	5939.79	7419.95	7388.55	7756.88	6032.12	4368.42	7893.36	6720.6	9263.14	7431.62	9898.04
SSVAVPYVIVPLK	P49911	Complement C3	5602.03	4269.74	4981.46	1938.07	4352.78	7023.46	3663.57	5259.67	3897.79	2506.67	5271.98	6562.99	4245.03	5812.87	10484.8	7117.7
AVLFNYR	P50123	Complement C3	7727.46	5864.82	6162.94	4364.48	4500.24	4591.06	5612.22	5264.03	4440.91	2887.52	5906.12	7603.36	5617.88	7704.01	5450.43	6113
IGLQEVEVK	P50137	Complement C3	3392.91	3804.82	4169.46	2606.4	2178.63	2267.22	3844.63	3388.32	3016.34	2668.35	3375.74	5926.03	3839.21	3456.09	3112.74	3804.08
VLIEDGSGEAVLSR	P50398	Complement C3	5215.3	4671.68	5810.31	2705.74	2095.52	4445.33	2661.52	4633.7	N/A	2603.01	2830.57	7001.78	3059.12	3726.88	2868.46	3305.7
RVPVVTQGSDAQALTQDDGVAK	P50399	Complement C3	1597.9	1885.03	2140.33	1424.05	N/A	1546.84	1802.73	2747.11	1717.27	1078.24	1243.6	2382.94	2329.3	2822.2	N/A	2870.8
GLEVSITAR	P50475	Complement C3	3257.23	2438.54	3170.75	2963.31	1685.67	N/A	3204.08	3045.03	N/A	2055.62	1968.25	3627.38	1934.76	3025.48	N/A	2923.57
ACEPGVDYVYK	P50503	Complement C3	N/A	2945.04	3037.93	2921.88	2147.79	N/A	2907.88	3243.53	2173.53	2520.03	N/A	5442.6	3421.98	3641.85	3425.08	4322.51
LITQGESCLK	P50554	Complement C3	3913.42	3253.39	2563.83	2097.07	2448.18	N/A	3173.92	3567.47	2442.87	2083.37	N/A	4814.65	2857.17	2814.01	N/A	3236.19
RQEALELIK	P50878	Complement C3	574.953	706.749	940.816	614.827	777.693	958.263	1057.25	1090.24	N/A	370.892	849.064	1119	740.982	756.015	639.619	N/A
QVVAGTNFFIK	P51111	Cystatin-B	3219.61	2843.13	2974.58	2402.14	2384.5	3128.8	3333.86	2204.4	4931.18	3030.11	2485.35	1639.17	2322.23	1745.84	2479.36	2675.83
VNLFSDR	P51158	Thy-1 membrane glycoprotein	64851.5	44894.2	50505.7	32513	64853.2	69779	35411.7	46712.8	66517.7	36854.8	70218.9	72703.9	39617.9	65669.7	58119.5	32444.1
VDPVNFK	P51489	Hemoglobin subunit alpha-1/2	142618	154631	73916.5	82719.7	157132	84109.4	269399	201353	87140	3000488	136950	132367	103349	117379	143032	92922
MFAAFPTTK	P51583	Hemoglobin subunit alpha-1/2	49045.8	69695	86959	52541.4	92480.1	82558.8	67247.6	231046	28990.3	1.34748e+06	210286	27697.3	50823.2	164612	135000	39479.2
TYFSHIDVSPGSAQVK	P51635	Hemoglobin subunit alpha-1/2	48133.8	53835.1	39390.8	49923.7	70664.8	31569.5	115428	98735.2	40939.9	1.02098e+06	53914.8	49785.1	58899.7	61127.6	76478.3	52120.8
IGGHGGEYGEEALQR	P51647	Hemoglobin subunit alpha-1/2	27935.9	40061.8	22802.6	26787	52575.8	34639.4	72752	61450.3	39861.4	1.21002e+06	37956.8	30730.1	31845.4	35711.4	52299.3	30434.1
FLASVSTVLTSK	P51650	Hemoglobin subunit alpha-1/2	44566.9	42574.9	31823.6	35071.5	48398.3	25987.2	96726.4	54539.9	38759.8	745944	51809.5	28295.3	42596.2	48760.3	34888.2	38074.5
LRVDPVNFK	P51840	Hemoglobin subunit alpha-1/2	15889.9	19589.7	8358.71	11854.4	19588.7	6522.83	22187.7	15624.7	13994.7	138401	11699.2	13681.9	11521.4	15947.7	16165.2	12496.4
VNPDDVGGEALGR	P52287	Hemoglobin subunit beta-1	197308	142054	77249.3	88532	159961	82569.7	201644	216042	145047	2.8096e+06	148671	113826	110510	236946	306688	188822
YFDSFGDLSSASAIMGNPK	P52296	Hemoglobin subunit beta-1	11282.5	6809.23	4380.26	3087.22	11052.2	5862.91	7796.07	13483.9	8048.38	179074	18319	5524.33	6493.78	11526.4	16436.5	5816.8
LVVFEQENFQGR	P52303	Beta-crystallin B1	26968.2	39404.4	12738.9	131851	5596.59	21121.1	21386.3	35642.4	324444	89450.5	8622.76	105246	17739.9	15454.6	25143.8	5066.63
ICLFEGANFK	P52481	Beta-crystallin B1	23712	28925.7	9800.19	78921.4	5022.03	18864.2	16565.7	26752.9	297852	57868.6	6601.83	84722.5	14439.1	12927.1	38320.2	N/A
VGELPPGSYR	P52555	Beta-crystallin B1	40808	76097.1	29540.1	266282	N/A	41747.5	48357.6	60899	513807	213664	N/A	162523	39389.9	29260.9	81842.3	8974.07
RVEFSGECLNLGDR	P52873	Beta-crystallin B1	19264.1	28047.4	9641.63	53968.3	5831.31	15340.7	21112.8	25664.8	101379	36454	6189.9	38245.9	15756.3	12884.6	21524.5	3374.73
GYQYLLEPGDFR	P52925	Beta-crystallin B1	59531.2	36907.6	18637.5	66601.3	12326.7	36508.9	29860.6	55169.9	893131	65452.7	14481.3	147101	28832.2	34765.9	103565	12178.9
GEMFVLEK	P53042	Beta-crystallin B1	10458.3	20765.4	8566.74	44322.8	4329.11	13879.2	9738.88	19779.9	41878.6	23958.7	8729.63	39177.1	10110.8	13049.4	19054.6	N/A
CELSAECPNLTESLLQK	P53534	Beta-crystallin B3	17708.4	8465.24	3936.18	15793	2659.58	11573.7	7128.58	13050.8	227799	25667.7	3983.51	29862.1	7659.14	12047.2	101688	2696.61
LHLFENPAFSGR	P53678	Beta-crystallin B3	42639.6	18931.7	7042.83	69960.3	14609	20426.3	21436.2	23499.9	230237	56229	11652.9	40912.4	17864.9	32604.1	19208.7	10935.2
VTVYELENFQGK	P53812	Beta-crystallin B3	33236.7	32801.6	9787.88	48753.1	6521.54	8951.78	24576	32736.1	380949	40896	7960.07	73422.6	20691.3	19086.9	56929.9	4655.4
VGSIQVESGPWLAFER	P53813	Beta-crystallin B3	7331.36	2131.71	1956.47	4206.7	N/A	3745.1	2471.09	5256.87	37090.1	5106.86	N/A	8643.12	3575.25	1746.27	6998.65	N/A
QYLLRPQEYR	P53987	Gamma-crystallin C	N/A	9736.36	6345.51	39758.5	1343.4	1992.31	7071.45	3109.77	49196	14533.1	1261.17	14588.2	1371.62	807.313	2371.64	N/A
TANLGAGAAQPLR	P54290	Apolipoprotein E	3141.14	5493.1	3937.01	3508.26	4263.77	3509.5	4328.98	4543.74	6422.87	3521.08	4754.59	6596.63	4753.3	3666.62	5055.47	6274.2
LQAEIFQAR	P54311	Apolipoprotein E	6040.54	10468.1	7013.96	6717.65	6780.27	N/A	6394.81	7692.03	6549.69	5852.91	9131.58	10962.6	6047.41	6937.72	8141.79	9244.94
ALDVNVALR	P54313	Retinol-binding protein 1	4404.67	3187.78	4138.17	3737.19	2404.81	3617.54	4273.88	3676.52	3517.95	2951.48	4783.09	3209.08	3468.26	6719.95	3701.09	4651.6
APQVSTPTLVEAAR	P54319	Albumin	293141	285912	213911	192373	295381	318646	293140	388846	328693	161154	270078	534802	299175	280622	383999	376588
LVQEVTDFAK	P54690	Albumin	192622	173241	155675	127279	173981	195620	193764	234907	188458	111107	167848	329998	173211	174400	220637	214019
LGEYGFQNAVLVR	P54921	Albumin	184517	150382	109460	93772	161061	155899	145201	209073	202879	92223.3	149323	260373	164652	155418	253945	211488
QTALAELVK	P55016	Albumin	92283.4	104936	69212.6	74720.7	83320	97170.3	102086	100517	79585.8	62841	82701.1	167441	105231	99969.6	127291	108117
DNYGELADCCAK	P55053	Albumin	38717.8	47677.7	36297.4	39587.4	32700	39209.1	44492.3	49604.7	49422.5	38475.3	47292.8	63329	55588.1	51925.7	67451.8	62745
SIHTLFGDK	P55161	Albumin	46444.3	53152.8	40429.3	41520.2	43503.8	44876.3	50670.7	73106.5	66594.5	39662.4	50522.2	86663	66062.4	56338.6	51527.1	64117.1
LPCVEDYLSAILNR	P56374	Albumin	17197.2	8430.07	10459.7	6866.83	27273.8	29456.8	12408.6	18989.1	20514.8	7419.97	8746.12	13490.1	18053.7	24377.8	17570.6	17872.3
KQTALAELVK	P56558	Albumin	12690.5	11836.8	10263.2	8761.8	12273.8	14035.8	13250.2	18186.1	15210.9	8952.28	12094.2	22883	15199.1	15022.4	17860.9	17921.6
LQACCDKPVLQK	P56571	Albumin	13782.5	9432.07	7485.19	4739.61	10399.5	11083.5	9201.53	13164.9	8926.14	6715.21	7291.17	21104.8	11983.4	12775	14161.4	14059.7
CCAEGDPPACYGTVLAEFQPLVEEPK	P56574	Albumin	5414.8	3764.15	3046.14	1105.46	3920.94	6117.14	3833.28	4677.51	3876.22	1870.51	3026.3	8222.79	5539.82	3476.55	27313.8	7499.88
DNCFATEGPNLVAR	P56603	Albumin	4585.7	5447.67	3074	2798.81	3518.67	3696.77	4369.02	5192.37	5169.7	3157.77	4822.12	6948.81	5479.42	3633.03	5379.4	5538.64
YNEVLTQCCTESDK	P58405	Albumin	102623	42679.7	30238.2	31110.5	42105.3	46246.6	43653	55756.1	35350.7	30836.9	41291.7	73801.6	53833.8	107441	138325	59308.9
AADKDNCFATEGPNLVAR	P59215	Albumin	95790.4	49652.5	37877.5	33669.1	82950.9	87071.3	96242.6	56264.4	58798.1	30571.9	38554.7	160135	52579.8	49074	122604	58240.9
ECCHGDLLECADDR	P60123	Albumin	17552.7	25081.5	14980.3	17362	32009	41605.5	24866.6	25277.7	31464.9	13213.7	37558.5	39694.1	21943.8	50961.1	48113.8	21890
AETFTFHSDICTLPDKEK	P60825	Albumin	12745.4	13935.6	10794.7	15097.5	11661.8	9927.45	18736.8	20008.6	15522.1	10574.9	12865.9	25324	19267.4	12643.1	9103.65	17758.1
GLVLIAFSQYLQK	P60868	Albumin	8568.28	3499.07	4770.35	2374.07	7680.71	6062.56	3396.58	5629.18	13027.3	2133.97	5249.32	4939.6	4801.96	11028.8	N/A	5018.47
LRDNYGELADCCAK	P60881	Albumin	1948.4	3389.23	3419.07	1790.45	5143.06	4479.78	4832.38	5356.74	3741.82	2008.8	3765.76	5576.45	3154.6	4002	6121.3	6443.99
TVMGDFAQFVDK	P60901	Albumin	14187.9	14804.9	13100.5	9098.12	30447	16211.9	11127.1	17528.3	15222.9	9003.6	40456.1	29164.1	16404	32306.7	33390.1	32058.8
DVFLGTFLYEYSR	P60905	Albumin	27351.9	10614.3	12804	1798.25	19846.5	19338.9	16441.3	17356.3	29190.4	2829.72	26342.5	20701.8	14161.7	23733.2	13936.3	17592.6
FPNAEFAEITK	P61107	Albumin	191652	192761	130364	105770	215527	213884	192509	219108	217910	108427	179337	358291	195881	164520	258543	241982
AETFTFHSDICTLPDK	P61203	Albumin	16468.4	6870.85	9414.29	5104.02	10349.5	11363.3	15726.7	17929.2	16507.8	4371.52	9469.88	22855.7	15289.5	14155.4	N/A	15119.1
HPDYSVSLLLR	P61212	Albumin	N/A	4940.88	5603.48	2968.05	5435.45	4135.86	9575.84	5500.35	4845.53	2373.65	6772.49	5702.11	5414.49	5225.01	N/A	5953.68
RPCFSALTVDETYVPK	P61227	Albumin	32877.7	35176.3	21014.9	12099.2	23478.1	22225.2	41496.9	35394.9	52225.9	20533.4	23858.9	45966.3	39305	28379.2	23478.6	53949
YSLFGALR	P61265	NADH-ubiquinone oxidoreductase chain 1	14839.9	8626.1	11558	7734.8	11721.3	13696.2	11181.1	8588.97	12435.9	9608.68	12686.7	7468.55	11933.4	17474.7	13915.8	11754.9
GPNIVGPYGILQPFADAMK	P61354	NADH-ubiquinone oxidoreductase chain 1	518.101	213.686	396.467	118.524	572.819	N/A	272.501	472.647	583.424	83.3821	616.214	N/A	573.952	895.918	1072.99	N/A
EDSIPQLEDVSR	P61589	Tyrosine 3-monooxygenase	4664.03	2947.35	3833.79	2672.42	6576.13	4121.47	4639.06	4178.66	3372.48	3964.1	4458.19	4005.4	3725.18	4604.91	6090.63	4706.26
GLLNAIVIR	P61751	Ornithine aminotransferase, mitochondrial	15139.2	8890.6	9641.84	6818.33	13404.9	13747.2	14771.2	9873.97	16526.5	9745.49	9722.6	5912.56	9154.27	21649.1	15792.6	11866.3
LAPPLVIK	P61765	Ornithine aminotransferase, mitochondrial	12952	8027.95	6194.1	4846.57	9278.51	8259.45	10123.8	10459.7	9545.29	7379.41	7141.36	9669.31	7798.94	11368.6	11730.7	8961.5
LPSDVVTAVR	P61805	Ornithine aminotransferase, mitochondrial	49196.6	35162.5	27426.6	25703.6	36874.5	35874	38730	37528.8	33834.4	33430.1	24678.8	35928.5	29457.1	37912.7	39656.2	33007.2
AFYNNVLGEYEEYITK	P61972	Ornithine aminotransferase, mitochondrial	4399.39	1406.24	1257.33	385.682	1402.16	1009.67	1741.06	2967.88	2172.84	758.119	1452.2	1478.83	1978.08	1883.61	2448.83	1422.38
KTEQGPPSSEYIFER	P61980	Ornithine aminotransferase, mitochondrial	11738.7	8861.03	7546.24	8455.66	8040.98	6572.61	10237.2	9067.19	11923.2	9130.24	5507.81	7415.11	9497.12	9989.2	10497.1	8573.11
GFAFVTFDDHDSVDK	P61983	Heterogeneous nuclear ribonucleoprotein A1	8835.08	6604.51	3820.98	5568.11	4625.13	7898.87	4782.15	8027.32	8949.17	3844.5	11862	17606.7	5297.91	4572.7	N/A	5614.69
LFIGGLSFETTDESLR	P62083	Heterogeneous nuclear ribonucleoprotein A1	19596.2	12247.9	5650.1	3083.19	12874	12771.1	5692.91	17471.3	19662.7	6530.83	13461.7	18758.4	6703.94	10267.9	N/A	7505.04
IEVIEIMTDR	P62193	Heterogeneous nuclear ribonucleoprotein A1	20674.3	23530.2	31005.2	18472.2	49446.3	52938	22790.9	51260.3	24691.5	13515.6	91260.2	54258.9	16577.9	45995.2	28496.7	31616.3
EGVIECSFVQSK	P62198	Malate dehydrogenase, mitochondrial	130743	127000	108050	94987.2	106331	122962	100646	121573	124000	92266.7	107303	128487	99737.1	102433	128117	130165
VNVPVIGGHAGK	P62243	Malate dehydrogenase, mitochondrial	42626.3	41252	36030.1	35592.9	38743.5	36674.5	42601.9	42568.7	39856.2	35065.5	38364.3	43923.8	35639.6	48927.8	45175	49369.3
VAVLGASGGIGQPLSLLLK	P62246	Malate dehydrogenase, mitochondrial	61461.7	26297.2	75431.5	21746.6	77830.1	117984	60685.3	34782.1	88057.4	36719.3	110506	40756.8	39302.8	142383	306358	111133
VDFPQDQLATLTGR	P62250	Malate dehydrogenase, mitochondrial	72402.7	33366.7	24667.4	12769.3	29006.8	36552.1	24395.8	34242.4	70386.5	15733.8	33462.1	42080	22164.8	41063.1	65786.7	35129.6
GCDVVVIPAGVPR	P62260	Malate dehydrogenase, mitochondrial	270873	221068	175874	116099	217014	237986	180157	219171	468752	135490	218912	495030	159399	378012	524269	256010
ETECTYFSTPLLLGK	P62268	Malate dehydrogenase, mitochondrial	177355	47787.2	40295.7	17503.5	62713.3	148257	31855.6	52740	189295	31137.7	51280.7	110830	75380.6	151090	329141	128720
AGAGSATLSMAYAGAR	P62271	Malate dehydrogenase, mitochondrial	14860.8	10598.8	10474.6	8900.08	10067.5	8782.78	8007.07	15263.3	10742	7139.23	18343.7	10173.2	11878.6	20662.3	11376.1	13043
GYLGPEQLPDCLK	P62278	Malate dehydrogenase, mitochondrial	275797	234639	195925	63349.5	238197	249152	181963	238358	285667	154444	231838	249986	147283	199401	260210	241692
IFGVTTLDIVR	P62282	Malate dehydrogenase, mitochondrial	176766	112557	136736	63281.3	141915	199438	98615	136332	215871	81276.8	164217	123298	84335.7	153840	162051	155695
ANTFVAELK	P62425	Malate dehydrogenase, mitochondrial	130638	122298	130989	112414	129457	132455	116406	103820	126582	100833	148940	149785	104842	130343	140789	137382
TIIPLISQCTPK	P62630	Malate dehydrogenase, mitochondrial	78115.7	47022.5	41776	28308.6	68760.9	54933.5	39060.4	47652.9	59714.7	26284.7	45609.1	48576.3	35787.2	41701.4	75560.7	63848.7
LTLYDIAHTPGVAADLSHIETR	P62632	Malate dehydrogenase, mitochondrial	N/A	2087.44	2444.27	5389.62	N/A	2978.91	5516.08	3975.83	7565.14	3085.32	6594.71	5206.05	3493.24	2952.55	N/A	4603.53
MIAEAIPELK	P62697	Malate dehydrogenase, mitochondrial	81038.9	106791	107411	35654.1	117214	114168	64984.5	114486	34680.8	29555.8	129973	110382	32883.4	131898	99169.6	83345.3
FVFSLVDAMNGK	P62703	Malate dehydrogenase, mitochondrial	2995.22	5567.52	4494.98	3818.27	5748.61	2538.09	3295.15	1663.43	N/A	4763.93	11955	2558.52	4515.86	4301.86	3047.33	N/A
VTLTPDEEAR	P62718	L-lactate dehydrogenase A chain	2.06393e+06	1.82946e+06	2145542	1.33468e+06	1.73615e+06	2.26205e+06	1.71511e+06	2104567	1813951	1.41152e+06	2.01339e+06	2.56895e+06	1.46899e+06	2.2643e+06	2.15223e+06	2.09882e+06
DLADELALVDVIEDK	P62744	L-lactate dehydrogenase A chain	792305	8078.39	72796.5	31116.1	237544	409943	338505	369507	383064	27422.3	242751	365730	220411	477023	2.16128e+06	584436
DQLIVNLLK	P62752	L-lactate dehydrogenase A chain	814362	478558	553941	220332	1.26197e+06	705804	436659	713768	1.039e+06	276815	894527	657704	388517	988203	2253193	705910
FIIPNVVK	P62755	L-lactate dehydrogenase A chain	509701	793072	753975	232729	870431	985985	686330	705882	1049152	217972	847346	747212	614004	786640	1.17931e+06	1005547
QVVDSAYEVIK	P62804	L-lactate dehydrogenase A chain	988018	678915	724137	245433	813311	778754	686044	792080	830658	485011	829858	813767	621894	868445	993037	907636
SLNPQLGTDADKEQWK	P62815	L-lactate dehydrogenase A chain	13726.9	16209.4	21433.2	24501.3	18537.8	18397.4	27487.5	14732.4	23607.7	21302.3	12995.3	28366.3	24757.4	27874.4	26627.5	18535.2
SADTLWGIQK	P62824	L-lactate dehydrogenase A chain	136179	138413	202727	122379	94291.4	163992	168927	185602	187932	123957	66214.2	138832	184217	140538	144517	166338
EDVFLSVPCILGQNGISDVVK	P62832	L-lactate dehydrogenase A chain	41742.9	13041.8	26978.1	4561.55	60243.7	47872.3	35309.5	31364.5	9466.55	14286.5	32540.9	29559.8	21162.3	48877.4	116591	43336.7
GEMMDLQHGSLFLK	P62850	L-lactate dehydrogenase A chain	13126.5	10090.5	20660.4	15532.1	19968.1	22321.6	8312.29	24623.8	10168.9	10784.8	46748.8	21341.7	12116.5	57356.6	43768.6	36743.5
ITVVGVGAVGMACAISILMK	P62853	L-lactate dehydrogenase A chain	4731.94	4826.04	3216.88	1617.33	13968.3	2969.14	6862.39	5771.52	3205.7	1642.04	14060.2	7363.81	3536.51	9832.45	1833.35	5329.08
VCEEIAIIPSK	P62856	40S ribosomal protein S17	10010.5	10097.5	8204.94	6494.93	9951.51	8072.04	6299.75	8611.69	11122	6956.4	9402.56	12561.7	7386.86	8448.91	10056.1	7908.97
LLDFGSLSNLQVTQPTVGMNFK	P62859	40S ribosomal protein S17	982.247	922.56	1438.24	784.612	1912.97	N/A	1482.54	1420.18	N/A	704.323	1793.63	1285.97	701.479	1514.27	N/A	933.857
DETEFYLGK	P62864	60S ribosomal protein L35a	5328.48	6206.92	3169.81	3832.46	4623.71	3789.64	3918.37	4121.49	5373.68	6105.56	3586.53	3870.43	4530.77	2240.1	3579.44	3233.55
EAETFPFNPFDLTK	P62870	Catalase	4355.84	1529.97	2406.73	541.712	3716.77	6292.84	2325.93	2705.27	3759.26	4975.51	4686.31	2741.73	1925.1	4736.99	10783.8	2897.56
FSTVAGESGSADTVR	P62882	Catalase	2118.9	1891.75	1919.07	1487.39	1542.42	1486.77	2028.98	1786.95	1235.15	7497.09	1000.06	1970.23	1626.28	1484.27	1769.67	1846.22
TIAPALVSK	P62890	Alpha-enolase	2.55484e+06	2169996	2.02114e+06	1.30365e+06	2109622	2.26839e+06	1796923	1.88501e+06	2.2688e+06	1.45033e+06	2.05064e+06	2.48552e+06	1.58384e+06	2.38369e+06	2323970	2.31007e+06
EALELLK	P62898	Alpha-enolase	1194773	857519	824736	602636	903968	1017942	789710	928936	838537	625018	882716	1.0827e+06	698580	1113360	1.19369e+06	1.04178e+06
IGAEVYHNLK	P62902	Alpha-enolase	450433	345770	494626	269597	503215	533294	412269	483551	511761	341263	483038	455677	364134	554986	571897	491939
SCNCLLLK	P62909	Alpha-enolase	838434	798800	683103	463900	668344	713934	578422	621447	773680	556186	622666	761370	570647	801716	734477	738530
DATNVGDEGGFAPNILENK	P62914	Alpha-enolase	334905	165566	194512	84091.3	394003	270746	115285	220201	280211	79598.1	202068	220602	155584	208078	524682	364483
GNPTVEVDLYTAK	P62919	Alpha-enolase	1.17123e+06	1.25978e+06	1.44908e+06	1.00034e+06	1.20879e+06	1.41757e+06	1.15987e+06	1558634	1.04719e+06	926883	1.34277e+06	1.5074e+06	1136057	1.34583e+06	1.34677e+06	1.55586e+06
AGYTDQVVIGMDVAASEFYR	P62944	Alpha-enolase	13371.4	17398.7	17283.7	12890.6	16561.9	13063.6	12415.5	14593.7	18088	11131.7	27981.4	19406.1	11029.4	10932.4	15120.5	12346.8
LAMQEFMILPVGASSFR	P62959	Alpha-enolase	235164	128225	276211	71461.8	486348	324631	151628	273728	205312	84445.9	896398	240024	160131	501911	641350	260291
YITPDQLADLYK	P62961	Alpha-enolase	4.80415e+06	1.63812e+06	1464866	501312	2223277	5243699	1.11973e+06	3.59277e+06	4.92439e+06	775565	2.03892e+06	3.72453e+06	2.40311e+06	4.28774e+06	10155833	4682355
FTATAGIQVVGDDLTVTNPK	P62963	Alpha-enolase	291230	217512	141529	146094	231813	127685	165071	215154	259547	152872	127210	168620	118430	134190	197973	218342
AGKYDLDFK	P62966	Alpha-enolase	1761.28	1435.46	1414.68	1770.14	2823.84	2244.56	1678.69	2364.22	1507.6	1039	2013.3	2424	1631.23	1675.31	2787.79	2525.6
IDQLMIEMDGTENK	P62997	Alpha-enolase	92044.6	99376.4	147074	94933	121748	113985	68609.5	142506	62557.6	66525.8	249810	121599	94026	232217	127589	90580.8
FFPASADR	P63004	Protein disulfide-isomerase	31560.9	20864.6	17566.4	12964.6	21253.9	25595.8	17582	14749.5	22236.3	19346.3	14088.7	15828.5	20964	16137	19742.9	24408.3
NFEEVAFDEK	P63012	Protein disulfide-isomerase	11103.6	13359.9	8431.87	6138.03	10979.6	10884.6	7757.56	6229.07	8968.35	9262.58	6759.71	7194.3	7814.32	5575.85	9552.41	11034.2
DGVVLFK	P63018	Protein disulfide-isomerase	6225.75	N/A	3687.07	2414.99	4904.94	2983.98	3435.38	N/A	5024.44	3617.8	3601.37	3083.72	3833.21	2818.41	2703.33	4618.51
VDATEESDLAQQYGVR	P63039	Protein disulfide-isomerase	11755.5	3283.71	2665.84	1902.84	5390.09	5221.82	4353.76	3713.15	5122.51	2810.48	2397.41	2458.2	2451	4996.67	7374.96	7289.8
LITLEEEMTK	P63045	Protein disulfide-isomerase	6286.5	8567.4	7740.79	5065.96	7143.62	7370.97	4440.21	5200.82	5108.02	3030.3	6898.86	5009.48	5654.67	8093.03	5787.73	5106.49
ILEFFGLK	P63086	Protein disulfide-isomerase	3814.26	2482.52	2441.06	1235.29	3598.82	4029.45	2148.97	N/A	5186.38	2281.94	2061.5	1353.98	2010.12	N/A	N/A	3515.92
HNQLPLVIEFTEQTAPK	P63088	Protein disulfide-isomerase	4312.6	3749.53	2615.55	2191.99	1139.07	987	3270.72	3336.35	4699.34	2500.87	1450.21	2621.09	2705.04	2149.12	N/A	4352.38
GAAQNIIPASTGAAK	P63102	Glyceraldehyde-3-phosphate dehydrogenase	6.61673e+06	6.28316e+06	5645996	3.76086e+06	5731178	6.7513e+06	5428485	5979511	5897256	4220986	5652609	7.58399e+06	4759385	7642726	7630339	6.86507e+06
LISWYDNEYGYSNR	P63155	Glyceraldehyde-3-phosphate dehydrogenase	332573	115646	150365	80485.4	99874	97968.2	141634	157960	277768	90468.4	45386.4	138116	158002	126771	197705	152524
LVINGKPITIFQER	P63159	Glyceraldehyde-3-phosphate dehydrogenase	32732.4	30481.5	40546	27252.1	51963.2	24480.3	38354.5	23597	41454.9	26401.3	32650.5	25935	30756.4	46791.5	35099.5	44379
VKVGVNGFGR	P63245	Glyceraldehyde-3-phosphate dehydrogenase	5996.15	N/A	4336.83	3032.48	4946.62	3568.5	2562.93	2630.53	7033.11	4111.07	3423.82	2977.04	3709.11	3506.71	2540.71	4594.08
IVSNASCTTNCLAPLAK	P63322	Glyceraldehyde-3-phosphate dehydrogenase	512403	330171	252777	228363	358147	298484	267884	335534	337992	200418	198136	329128	250797	300000	438925	465814
VIISAPSADAPMFVMGVNHEK	P63324	Glyceraldehyde-3-phosphate dehydrogenase	71073.8	102258	222011	154855	293619	126072	94958.2	144801	73696.9	120582	437149	148756	101626	243846	393812	163508
VIHDNFGIVEGLMTTVHAITATQK	P63326	Glyceraldehyde-3-phosphate dehydrogenase	7448.71	29258.4	8325.5	29693.7	27839	14228	22427.5	25824.7	22473.7	11014.7	21214.5	16716.4	12089.5	28758.8	9457.09	12881.8
WGDAGAEYVVESTGVFTTMEK	P63329	Glyceraldehyde-3-phosphate dehydrogenase	17115.3	22275.9	45263.5	20060.3	21751.7	29647.7	18449.4	12771.8	17816.8	20947.2	14919.2	28972.1	33395.6	57841.5	29796.8	21753.2
GILGYTEDQVVSCDFNSNSHSSTFDAGAGIALNDNFVK	P67779	Glyceraldehyde-3-phosphate dehydrogenase	22546.9	14588.1	17406.4	5792.85	11242.8	5634.5	11924.2	10656	46292.9	6566.37	18311.2	19017.1	11011.1	14459.5	12303.1	15422.6
VVDLMAYMASK	P68101	Glyceraldehyde-3-phosphate dehydrogenase	49724.4	49803.6	92113.8	76240.1	83425.8	96218.8	153612	99272.9	42898.1	38708	274220	159927	46944.7	240773	222948	54256.9
VVDLMAYMASKE	P68182	Glyceraldehyde-3-phosphate dehydrogenase	9019.92	9320.96	10170.5	6846.75	12544.4	9057.57	7749.31	12525.7	7550.96	5802.46	7571.98	7770.72	8268.81	16126.9	5006.81	8995.13
IAQSDYIPTQQDVLR	P68255	Guanine nucleotide-binding protein G(i) subunit alpha-2	24189.6	14030.7	12412.9	9607.01	15015.6	14235.1	15269.7	14733.6	21238.7	12548	12880.1	15414.4	13228.4	14415.8	25293.7	17493.2
AMGNLQIDFADPQR	P68511	Guanine nucleotide-binding protein G(i) subunit alpha-2	4261.76	2261.12	3659.14	2935.17	4633.37	2888.72	2545.16	5662.23	2430.7	2862.28	5775.5	3928.66	3870.08	5285.34	4351.61	3711.4
LGLDFPNLPYLIDGSR	P69060	Glutathione S-transferase Mu 1	6144.05	1956.26	3620.68	1091.58	5051.75	8507.71	3330.08	8644.69	7103.06	1861.81	5059.81	4471.02	4416.53	10573.6	6112.98	4233.1
STCLYGQLPK	P69682	Glutathione S-transferase P	34867	31821.7	22891.6	24420.2	25812.1	29034.9	31794.8	29489.3	36963	27861.3	23916.3	31333.8	28147.3	36945.1	34036.1	32227.8
PPYTIVYFPVR	P69897	Glutathione S-transferase P	6377.79	3014.81	5618.16	2384.24	6006.17	7846.84	4518.66	3892.99	7122.46	3320.61	7182.73	3717.19	4023.66	10911.1	3919.63	6438.56
FEDGDLTLYQSNAILR	P70483	Glutathione S-transferase P	3172.23	2655.26	1441.11	1411.68	1934.21	N/A	1957.37	2577.47	3624.13	1815.47	1842.54	1342.12	2367.67	2488.26	3853.39	3244.96
EAALVDMVNDGVEDLR	P70500	Glutathione S-transferase P	5310.66	2720.57	5200.61	1983.74	7023.1	4071.8	5821.48	10591.8	5777.78	2494.52	8547.78	10112.9	4440.5	14054.4	12579.6	7118.83
QLLLTADDR	P70501	Fructose-bisphosphate aldolase A	714299	691837	616398	469300	686617	601116	551199	587179	656442	503479	623958	762835	500147	753035	780985	614507
ADDGRPFPQVIK	P70566	Fructose-bisphosphate aldolase A	104507	102957	105945	104142	102067	92524.7	106532	104245	99779.6	85221.6	113547	138625	101585	119440	116448	118615
PHPYPALTPEQK	P70580	Fructose-bisphosphate aldolase A	41881.5	54967.7	58447.8	54083.4	46835.6	43358.3	69560.5	52080	55531.7	52423.9	66964	59386.7	55525.6	74710.8	66957.8	66424.8
YTPSGQSGAAASESLFISNHAY	P70615	Fructose-bisphosphate aldolase A	46569.1	103355	101966	77385.9	88454.1	81637.2	73580.6	95112.6	59416.5	80083.7	90020.6	93373.8	56085	47084.1	46401.3	72606
LQSIGTENTEENRR	P70619	Fructose-bisphosphate aldolase A	7538.93	33163.8	2391.78	11131.4	4349.55	17571.9	4890.3	13833.4	11381.8	13940.5	4480.01	12991.9	3627.1	3437.22	5135.82	5480.34
FSNEEIAMATVTALR	P70628	Fructose-bisphosphate aldolase A	31814.4	32125.6	30885.7	22790.3	28648.8	26191.1	23855.1	32070.3	34825.6	20158	74587	35621	22505.6	54373.3	31408.2	27383.5
GILAADESTGSIAK	P70645	Fructose-bisphosphate aldolase A	1.32114e+06	652744	645520	516446	714038	1.55403e+06	993934	1.36097e+06	1.11704e+06	434366	597985	1.5408e+06	877330	1.52674e+06	1.35046e+06	1.27799e+06
TVPPAVPGVTFLSGGQSEEEASINLNAINK	P80432	Fructose-bisphosphate aldolase A	43127.8	24505.7	28438.2	13329.8	22605.6	13529.1	27698.7	24669.6	53017.9	12337.1	36202.2	27683.1	13268.5	40319.4	152538	36704
GVVPLAGTNGETTTQGLDGLSER	P81155	Fructose-bisphosphate aldolase A	58612	82451.3	67301.6	29553.3	91213.3	92489.4	47845.4	50403.5	51140.7	46864.3	64617.1	71863.2	35171.2	45604.3	75737.2	48239.1
IGEHTPSSLAIMENANVLAR	P81795	Fructose-bisphosphate aldolase A	25530.9	27339.9	32323.1	33888.4	58907.7	18076.6	25690.5	36011.1	30099.7	25640.8	60115.8	27717.2	31558	59279.8	13249.4	27080.9
VNPCIGGVILFHETLYQK	P82471	Fructose-bisphosphate aldolase A	N/A	2800.44	2726.11	6663.02	2170.7	N/A	5209.82	2664.04	4599.72	4337.3	N/A	801.079	4135.83	1377.55	N/A	3153.4
FSVSPVVR	P82995	Elongation factor 2	138712	106152	121250	90222.8	113871	118881	123799	123947	131332	102581	113341	151014	101338	144858	150774	129696
GGGQIIPTAR	P83732	Elongation factor 2	104436	90740.8	79551.3	69299.1	80858.6	115655	93711.8	88983.2	85921.7	72635.6	84606.5	101348	75743.3	95297.5	106944	84661.8
VFSGVVSTGLK	P83868	Elongation factor 2	94838.1	69649.3	79490.9	65591.4	88346.7	83409.1	85615.1	88337	80152.7	80875.9	75435.8	82176.1	74930.9	95875.7	95051	74328
ETVSEESNVLCLSK	P84060	Elongation factor 2	42332.6	32691.1	31088.4	25983.6	36941.2	35689	34437.8	38190.1	35615.8	28803.6	32536.4	38947.5	32550.5	43516.9	48201.7	39007.6
STLTDSLVCK	P84083	Elongation factor 2	72398.1	65616.6	55385.2	51899.9	58779.7	64136.7	62025.5	48956.8	72819.9	58474.1	55763	64587.3	54818.5	65954.7	73172.2	58088.8
GVQYLNEIK	P84092	Elongation factor 2	58177	51764.1	53365.6	49796.1	66014.2	63360.3	57029.7	45158	61262.5	55004.8	56139.1	58784.6	52887.4	63984.5	71648.2	62623.3
YEWDVAEAR	P84817	Elongation factor 2	17826.5	15049.9	17313.4	13812.5	12688.4	15536	19306	16006.5	17038.1	16257.7	8181.94	11975.2	19085.6	11953	16403.5	14827.4
EDLYLKPIQR	P84903	Elongation factor 2	19560.6	13431.7	15436.1	11861.7	17236	16357	16715.2	15241.4	19319.3	13660.5	14777.4	15086.6	14389.7	17513	18700.7	15166.3
VTDGALVVVDCVSGVCVQTETVLR	P85108	Elongation factor 2	2007.24	1452.76	1715.07	700.14	1008.99	N/A	937.564	N/A	3227.5	753.818	1534.43	1260.03	871.44	2777.51	N/A	1055.91
ARPFPDGLAEDIDK	P85515	Elongation factor 2	N/A	2861.88	2786.33	3041.89	N/A	2509.3	4222.63	2948.02	N/A	3972.44	3601.77	4080.1	3656.56	N/A	2385.99	1899.25
DLEEDHACIPIK	P85834	Elongation factor 2	15758	10039	24999.5	10403.5	22258.4	27259.2	21448	21262	9849.03	8925.66	21347.3	22265.6	11058.5	23855.7	18421.2	9530.06
TFCQLILDPIFK	P85845	Elongation factor 2	24285.1	11224.9	21531.8	3592.17	24994.3	29222.7	18230.8	17316.9	30689	11578.3	24036.8	16199.9	17356.9	28428.8	35998.6	22056.3
VNFTVDQIR	P85968	Elongation factor 2	80805.3	60854	69282.4	52878.4	71091.6	66728.3	69770.4	73521.7	81513.8	67211.3	64114.2	77505	60608.6	76169.1	86204.2	67888.5
CLYASVLTAQPR	P85969	Elongation factor 2	9617.99	8015.16	6662.05	3087.99	9590.13	8061.17	8941.41	8093.79	10572.8	8132.15	5402.54	6522.17	8044.56	8405.55	9506.43	9985.46
EGIPALDNFLDKL	P85970	Elongation factor 2	9275.02	3226.64	5022.43	2231.81	7550.27	9926.27	4380.84	9528.75	4294.5	2667.28	4510.81	7850.21	6505.04	11271.2	7705.76	6527.97
VFDAIMNFR	P85971	Elongation factor 2	11114.9	8958.34	14399.2	9457.47	16063.6	15239.2	11153.4	12712.2	11727.8	9895.45	16976.6	13961.3	10767	18045.1	14610.7	11878
DSVVAGFQWATK	P85972	Elongation factor 2	8128.52	5640.07	8223.09	5038.03	4971.04	9506.62	7603.49	10209.4	11340.8	5606.1	1567.87	8325.73	9132.62	4293.64	6292.87	6063.55
IMGPNYTPGK	P85973	Elongation factor 2	8853.39	7925.83	5142.84	3201.99	5326.16	8763.58	N/A	7974.88	6789.73	5960.9	8230.08	5542.98	3655.75	10090.9	4707.12	4274.28
YVEPIEDVPCGNIVGLVGVDQFLVK	P86172	Elongation factor 2	5260.95	2203	2510.28	1110.97	6286.51	6749.79	2431.79	6169.56	3514.66	2063.86	3070.75	3948.65	4958.45	5641.38	14614.8	4461.82
AYLPVNESFGFTADLR	P86173	Elongation factor 2	3457.01	2206.72	1332.16	1002.97	2261.12	N/A	1298.81	2553.49	2391.87	1647.79	912.092	1067.1	1490	1815.89	N/A	1519.88
GHVFEESQVAGTPMFVVK	P86252	Elongation factor 2	1987.58	4195.32	4805.38	6951.12	4500.91	3137.68	3150.99	8577.41	1175.04	6124.03	8269.36	6965.85	6642.3	2150.75	2180.74	3451.82
EVLEYNTVGGK	P97519	Farnesyl pyrophosphate synthase	12934.3	12913.4	8600.11	12789.2	12360	15124.4	7471.25	13446.5	15096.4	11137.5	11558.8	12978.2	12613	13050.3	10101.8	9834.54
ALYEELDLR	P97526	Farnesyl pyrophosphate synthase	5235.53	4586.85	4345.73	2822.29	3963.73	3072.07	4037.51	3796.69	3108.99	3587.93	3613.64	3442.22	2620.5	5929.01	N/A	4925.03
GLTVVQTFQELVEPR	P97536	Farnesyl pyrophosphate synthase	5303.74	914.836	1524.98	607.529	1564.86	3155.72	1302.54	2385.64	4458.28	793.158	2973.36	1355.85	1110.66	3046.16	1979.07	3393.58
LEEFFAR	P97544	Glucose-6-phosphate 1-dehydrogenase	18485.8	15600.5	14563.3	11174.8	15747.3	15969.3	12244	16077.3	14478	13355.5	16689.1	17803.3	11814.5	15435.5	13616.2	14442
LTVDDIR	P97546	Glucose-6-phosphate 1-dehydrogenase	6241.44	6876.67	7258.35	6967.88	7227.64	7707.29	8051.99	8392.47	8510.62	6847.82	7305.76	9257.48	5733.31	6840.4	6215.02	6606.16
VGFQYEGTYK	P97584	Glucose-6-phosphate 1-dehydrogenase	6069.75	4732.3	4891	4719.41	5120.71	5446.07	5523.21	5202.1	5991.46	5246.1	4718.91	3457.73	5788.97	6101.04	5977.15	6533.32
IIVEKPFGR	P97603	Glucose-6-phosphate 1-dehydrogenase	3485.2	3726.79	3115.34	2942.61	3040.54	2955.53	3428.51	3126.59	4407.07	3808.74	2643.72	2729.54	3130.19	2731.91	2641.38	3721.57
GGYFDEFGIIR	P97608	Glucose-6-phosphate 1-dehydrogenase	13137.2	7586.79	6597.44	3219.86	8980.62	9947.48	4706.42	8083.71	9009.52	5178.87	7945.65	7947.59	6132.32	11636.9	7660.11	8083.17
NSYVAGQYDDPASYK	P97685	Glucose-6-phosphate 1-dehydrogenase	7459.5	4804.28	4907.18	4186.88	4260.78	4962.41	4955.83	4796.71	5832.11	4878.47	4773.67	5558.28	5392.64	8732.03	10121.4	5819.36
DGLLPEDTFIVGYAR	P97686	Glucose-6-phosphate 1-dehydrogenase	9186.16	3877.13	6034.64	1736.04	6492.03	8895.47	4181.35	7066.45	6217.03	3094.26	9872.83	6841.11	5061.21	8266.38	22401.2	6949.32
LFYLALPPTVYEAVTK	P97689	Glucose-6-phosphate 1-dehydrogenase	4656.54	1502.4	5304.42	1190.12	5385.26	8827.84	3139.72	2879.64	5444.4	1790.12	9027.78	2597.48	3163.34	6557.19	6245.16	4188.83
DVAGDIFHQQCK	P97690	Glucose-6-phosphate 1-dehydrogenase	N/A	3097.9	2729.47	2836.72	2598.11	N/A	3039.88	1996.81	1498.79	1421.6	2289.52	3174.35	2491.45	1977.65	N/A	2438.2
AGNFYVPAEPK	P97697	60S ribosomal protein L7	6687.1	4297.11	5145.87	3928.53	4072.55	3253.55	3347.6	5364.97	3616.52	3695.19	5769.64	4565.52	5051.96	5463.42	4680.25	4447.45
VPAVPETLK	P97700	60S ribosomal protein L7	6687.92	6516.29	5696.73	5710.92	3672.05	6639.94	5662.54	5610.24	5831.13	4558.76	7706.19	6660.81	7109.14	6607.31	4526.11	5288.94
SVNELIYK	P97710	60S ribosomal protein L7	7354.93	5684.41	5629.73	4655.72	6017.23	4982.67	4923.4	5335.65	4575.71	4285.73	7523.94	5546.69	5428.47	5770.58	5089.19	4401.92
IALTDNSLVAR	P97829	60S ribosomal protein L7	16186.2	13015.2	10317.3	8271.76	9487.97	10532	8788.03	13740.1	11053.8	8241.31	14451	14429.5	10888.6	12915.1	11083.9	9076.89
KVPAVPETLK	P97834	60S ribosomal protein L7	2646.27	1593.22	1855.08	1116.57	1094.36	N/A	1423.66	N/A	2554.38	1386.52	1871.57	N/A	2869.13	2468.68	N/A	1748.92
ANPYECGFDPTSSAR	P97849	NADH-ubiquinone oxidoreductase chain 3	12320.9	9046.84	6748.98	3516.89	7931.19	7890.26	6729.79	7915.72	8842.8	6223.95	8488.89	9424.2	8331.63	11001.4	9270.93	10234
VSIILDPLTK	P97852	NADH-ubiquinone oxidoreductase chain 4	6908.7	4390.36	4761.34	2335.92	6875.95	5588.26	4768.96	6531.77	6277.57	3153.49	7595.45	6865.26	4804.64	7440.58	7539.7	4249.37
IAELFSDLEER	P98158	Serine protease inhibitor A3L	1698.25	1091.1	1325.28	1400.82	2042.05	N/A	1764.93	2076	N/A	1233.34	1206.98	3431.09	2799.9	N/A	3276.89	1516.26
GTEELYAIK	Q00438	Protein kinase C alpha type	17941.1	20350.4	20412	16443.2	19546.5	19723.5	21621.7	15422.2	17909.4	17251.4	19443	15678.2	16658.2	18794.4	22400.8	18364.5
EIQPPFKPK	Q00715	Protein kinase C alpha type	7990.35	8228.47	7132.79	6736.08	6677.29	6751.33	7724.81	7348.56	8096.62	7435.25	6950.85	9067.38	8174.61	7823.86	7953.27	8218.7
KGTEELYAIK	Q00981	Protein kinase C alpha type	258.117	796.835	601.275	1226.05	604.359	431.458	1495.29	507.287	1267.75	1208.64	N/A	506.743	880.088	851.22	1177.37	648.018
GAALITAVGVR	Q01066	Hexokinase-1	154127	93440.4	108729	107575	144100	140184	80914.6	121498	129127	104748	143000	115806	116496	143290	86028.2	86397.8
ITPELLTR	Q01205	Hexokinase-1	141343	93895.1	93180.8	83257.9	131316	128644	69719.1	93685.6	115339	80232.6	113633	127846	88296.4	97063.3	89713.2	68662.9
LALLQVR	Q01579	Hexokinase-1	133563	67076.3	80326.2	78976.1	114574	129988	62823.7	91447.7	104920	67379.8	102987	98517.8	74688.2	118033	90146.7	61447
FLSQIESDR	Q01728	Hexokinase-1	108383	86323.2	84204	80812.9	107134	107467	62661.6	77721.3	79660	94953.4	96159.8	106217	82428.4	84203.7	75596	63772.8
TTVGVDGSLYK	Q01986	Hexokinase-1	74718.7	62025.6	69887.4	67971.6	89421.3	75692.6	46453.4	70366.1	62635.4	72950.9	79124	71691.2	67118.2	73702	63069.5	50028.4
VVDEYSLNSGK	Q02253	Hexokinase-1	40876.4	30010.7	25710.5	21572.1	33872.6	32088.7	22699.2	29505.8	31736.4	31847.3	32239.1	32816.9	25239.6	29598.8	26897.8	20394.5
EGLLFEGR	Q02356	Hexokinase-1	109853	63383.1	70543.3	61074.1	97996.1	100914	50968.6	78283.1	67907	60360.5	97000.1	98008.1	66444.2	82432	81118.9	55624.3
FNTSDVSAIEK	Q02563	Hexokinase-1	59963.2	48155.9	46562.2	45192.4	55953.1	66427.1	36081.3	44267.5	45132.6	48733.5	55833	63956.9	47021.2	51586.6	44310.2	33145.5
HIDLVEGDEGR	Q02589	Hexokinase-1	12591.6	9368.29	11628.1	9228.32	15375.1	16239.6	8076.77	11594.8	9840.49	10433.5	12884.6	14748	10828.5	12907.1	11132.8	6774.08
ATDCEGHDVASLLR	Q02874	Hexokinase-1	21520	16603.4	15538.5	15825.5	20293.8	22692.4	12546.6	14618.9	18390.9	17182.3	16974.3	20117.7	15294.6	17815.4	14577	12526.7
SANLVAATLGAILNR	Q03114	Hexokinase-1	7644.19	4822.62	6341.33	4000.82	18404.2	14739.1	4390.1	5684.47	10646.1	6048.19	12227.4	6805.74	5469.6	14113.2	7724.93	6491.6
QIEETLAHFR	Q03346	Hexokinase-1	13488.5	9394.22	11807.1	9915.39	12750.1	10745.7	7514.04	10162.2	12397.9	9920.32	11072.2	13678.4	10676.6	10439.6	6848.42	7418.23
AILQQLGLNSTCDDSILVK	Q03555	Hexokinase-1	10691.7	1876.68	1239.39	1359.66	2392.18	1978.27	1583.57	2010.73	5718.25	2018.78	1221.87	2112.78	2142.67	4369.69	3740.34	2057.93
LSDEILIDILTR	Q04462	Hexokinase-1	9091.24	3072.11	1469.82	786.58	6797.43	4993.83	1600.83	5841.17	6521.17	988.998	4722.78	3471.84	1820.98	6364.1	N/A	1203.17
GDFIALDLGGSSFR	Q05095	Hexokinase-1	84822.7	32610.9	34634.3	8900.93	64055.3	68127.9	20507	57659	48881	27082.4	54818.3	57847.7	30697.8	48688.2	34849.7	27657.9
LPVGFTFSFPCR	Q05096	Hexokinase-1	11133.4	4363.39	6840.41	3103.32	11139.3	11023.9	4819.02	4367.2	11795.1	4627.08	8196.87	4687.27	6609.24	6114.94	6912.77	4254.37
CTVSFLLSEDGSGK	Q05140	Hexokinase-1	6588.83	4738.17	4473.77	4653.35	7938.87	6044.63	3470.06	5963.05	5477.7	2315.67	5960.03	5697.7	6048.74	5802.23	4068.2	4163.14
SIPDGTEHGDFLALDLGGTNFR	Q05175	Hexokinase-1	26132.7	16576	15936.4	12083.2	18635.3	18027.1	8523.08	22819.9	21424.3	13791.9	13166.8	24923.2	15731.3	24284.9	N/A	10405.3
AAQLCGAGMAAVVEK	Q05546	Hexokinase-1	8221.93	4931.99	7064.37	8139.79	9393.19	14691.7	2763.2	7157.61	4992.86	4170.77	11462.2	7233.07	5685.67	21470.4	9204.4	7201.73
LGVEPSDVDCVSVQHICTIVSFR	Q05683	Hexokinase-1	4075.17	2404.1	1524.8	1480.67	2316.76	N/A	1324.02	2460.56	1191.51	2803.27	720.13	1741.64	2077.72	N/A	N/A	1065.95
YIIIGDTGVGK	Q05764	Ras-related protein Rab-2A	19778.5	16306.2	14675.8	12124.6	17114.1	16396.4	16319.2	17317.9	19874.9	11803.7	17761.9	16353.9	13046.5	19903.2	18214.4	18099.5
SCLLLQFTDK	Q05962	Ras-related protein Rab-2A	4345.19	3370.15	3421.93	2606.7	2841.92	2664.07	2356.49	3209.9	3312.59	2859.65	2899.92	3034.26	2813.89	4530.16	2714.77	4308.47
GAAGALLVYDITR	Q05982	Ras-related protein Rab-2A	28210.5	20512.8	15808.6	8421.63	15609	19029.8	16487.8	19644.2	28293.2	5657.08	17068.5	19011	14285.1	26308.8	16193.1	19309.8
TASNVEEAFINTAK	Q06647	Ras-related protein Rab-2A	11804.6	9587.41	7784.82	3161.18	8368.45	7213.17	7519.89	8529.3	8833.79	6321.97	7245.62	9633.17	8223.77	8684.54	12525.5	9355.51
LAEVALAYAK	Q07009	Delta-aminolevulinic acid dehydratase	1924.76	2000.08	1738.18	2090.57	1103.04	N/A	2520.75	3715.42	3479.46	2803.35	1803.19	1030.47	2978.21	2051.05	N/A	2123.51
LPSDVVEESAR	Q07116	Alpha-2-macroglobulin	10397.4	9766.38	12429.4	8968.3	10277.6	13235.9	7327.94	10707.7	11928.1	9394.3	13445.5	11665.8	10538.4	10551.8	12563	12247.5
ELCGNEVPVVPEQGK	Q07205	Alpha-2-macroglobulin	5172.16	4530.71	3830.55	2711.95	4110.07	5110.65	3143.06	5835.54	4654.44	3201.14	5175.14	5422.78	5129.02	5136.94	8046.99	6650.76
YEIENCLANK	Q07266	Alpha-2-macroglobulin	2085.42	3229.65	3255.79	2859.97	3696.89	3366.84	1698.42	3278.18	3142.22	2797.85	2944.11	N/A	3762.33	2610.96	4326.26	4301.84
GCFSQLVK	Q07310	Alpha-2-macroglobulin	N/A	5634.03	5142.07	4502.98	5040	6092.61	3926.12	5421.72	4910.7	4544.37	6693.28	6552.9	5109.48	5817.33	6446.61	7185.4
DLTGFPQGADQR	Q07647	Alpha-2-macroglobulin	N/A	6765.6	6040.18	3798.79	5459.1	7138.85	3716.63	7710.11	5215.93	4374.49	7472.21	5993.79	6271.85	N/A	8198.87	6704.49
VTLPTVPGDYTVK	Q07803	Alpha-2-macroglobulin	7041.19	9021.34	7829.95	4057.72	6308.31	9689.44	4621.95	8391.85	8196.24	5075.41	8155.31	8579.92	6438.34	7320.08	10639.2	9325.25
AIAYLNTGYQR	Q07936	Alpha-2-macroglobulin	4503.52	4134.14	5164.26	3686.5	4244.5	4715.78	2239.08	4852.37	3516.35	4483.46	5565.7	2372.71	4886.39	4736.61	5509.2	5863.76
VAVQLEASPDFLAAPEEK	Q08163	Alpha-2-macroglobulin	2024.12	785.017	887.314	334.878	841.581	1200.18	509.058	1352.44	N/A	712.225	1992.54	1707.92	1007.88	1664.61	4605.84	2575.69
ATVLNYLPTCIR	Q08406	Alpha-2-macroglobulin	3243.61	2649.61	3641.19	1708.26	2962.89	4235.51	2209.21	3569.35	5460.75	2341.23	4262.8	N/A	3854.77	5509.83	9975.59	6743.03
GIVVYTGDR	Q08602	Sodium/potassium-transporting ATPase subunit alpha-1	146695	134961	137357	127876	167003	151227	150171	141680	159798	120217	136211	129911	132638	151027	160811	138956
YHTEIVFAR	Q08849	Sodium/potassium-transporting ATPase subunit alpha-1	35713.1	26738	31232.5	27743.6	28714.4	25751.4	33151.7	29885.2	37371.6	30526.7	25787.3	23132.3	30534.8	35801.5	19808	31360.2
LSLDELHR	Q08877	Sodium/potassium-transporting ATPase subunit alpha-1	43001.1	48132.7	43724.1	38560.7	41892.3	37934.6	38734.1	48188.8	47323.7	45101.4	37465.8	45730.8	43279.4	47986.5	48010.4	40143.4
DAFQNAYLELGGLGER	Q09073	Sodium/potassium-transporting ATPase subunit alpha-1	25909.4	12499	13002.5	5556.99	14731.6	18350.2	14229.8	18060.9	18384.9	8639.33	15405.4	18091.4	14108.4	18338.3	30141.8	14745.2
AVFQANQENLPILK	Q09167	Sodium/potassium-transporting ATPase subunit alpha-1	213655	65010.7	60657.4	38159	78244.6	78100.8	70422.6	87405.6	94817	48679.1	66402.2	84503.3	64101.5	217854	143653	77506.1
LNIPVNQVNPR	Q10836	Sodium/potassium-transporting ATPase subunit alpha-1	341767	120658	137431	95432.6	125660	136716	128024	156567	122822	91926.5	130873	157484	124343	329170	352344	276908
SPDFTNENPLETR	Q1HAQ0	Sodium/potassium-transporting ATPase subunit alpha-1	245453	225794	101947	70441.4	139599	120786	113650	231113	180320	98658.6	112246	115399	207795	208312	282590	221497
MSINAEDVVVGDLVEVK	Q1HCL7	Sodium/potassium-transporting ATPase subunit alpha-1	7327.48	8591.92	5171.31	3457.24	6784.15	7309	8914.12	6866.71	4093.81	4012.2	14281.3	7542.76	5486.41	9788.53	18266.5	4011.15
NIAFFSTNCVEGTAR	Q1JU68	Sodium/potassium-transporting ATPase subunit alpha-1	58348.5	26704.7	24122.1	8947.39	26226.7	25831.1	24924.8	30089.8	40820.8	18785.4	20919.5	29789.4	29752.2	24062.3	26206.7	33747.6
AVAGDASESALLK	Q1WIM2	Sodium/potassium-transporting ATPase subunit alpha-1	282991	218346	231821	162376	259220	242668	247663	212284	217133	201048	203670	254355	224546	296274	310086	235851
IVEIPFNSTNK	Q1WIM3	Sodium/potassium-transporting ATPase subunit alpha-1	174239	136933	132324	94561.4	148314	148518	132036	131875	149536	107667	143938	179371	103910	117778	157967	121827
TSATWFALSR	Q27W01	Sodium/potassium-transporting ATPase subunit alpha-1	11895.4	5580.81	9543.05	5985.27	7015.91	6384.79	10101.8	7531.06	15548.2	5837.02	1900.36	2897.99	10112.1	5267.96	4803.45	7272.46
ADIGVAMGIVGSDVSK	Q27W02	Sodium/potassium-transporting ATPase subunit alpha-1	3687.59	3255.47	3578.13	2309.94	3415.96	7829.77	2620.1	4811.07	3074.2	2651.91	5594.77	5223.77	2524.35	7182.55	6114.44	3897.16
KADIGVAMGIVGSDVSK	Q2IBD4	Sodium/potassium-transporting ATPase subunit alpha-1	9327.48	6541.79	7462.04	10434.8	9620.64	5728.33	7144.33	6312.34	8975.74	6755.04	13449.5	6166.28	8504.58	23440.2	6485.6	5867.95
DMTSEELDDILR	Q2PQA9	Sodium/potassium-transporting ATPase subunit alpha-1	12385	26546.3	15647.1	1781.5	24014.8	40876	5129.18	31959.9	6165.42	5415.83	26938.7	11448	5344.26	11701.4	21714.9	8937.72
EQPLDEELKDAFQNAYLELGGLGER	Q2TA68	Sodium/potassium-transporting ATPase subunit alpha-1	600.726	188.983	N/A	148.654	410.518	N/A	392.977	475.355	1086.95	114.631	N/A	1072.21	292.888	226.901	N/A	422.691
CIEVCCGSVMEMR	Q2TL32	Sodium/potassium-transporting ATPase subunit alpha-1	2848.17	1556.99	3430.07	2836.95	3614.38	2679.61	1394.86	2928.4	1049.35	1814.48	4577.6	2447.03	2269.77	7077.03	2589.83	2344.32
DTAGDASESALLK	Q32PX7	Sodium/potassium-transporting ATPase subunit alpha-2	46199.7	32459.3	32222.6	25500.1	45372.9	41835.4	41441.4	43807	23978.8	33455.8	21482.1	35231.7	36171.7	48629.7	53624.4	31845.3
DHTEIVFAR	Q3B7U9	Sodium/potassium-transporting ATPase subunit alpha-2	19826.9	10400.4	10801.3	8772.55	12803	11472.3	17170.8	15534.8	12039.7	12116.9	7209.41	12495	12939.4	16826.8	14143.9	11947.5
LSLDELGR	Q3B8Q0	Sodium/potassium-transporting ATPase subunit alpha-2	62066.6	34267.2	36957.2	25209.2	50185.6	50354.4	50249.3	51678.2	35969.2	31766.2	28669.5	41973	40399.4	75553.9	60797.1	42416.2
CIELSCGSVR	Q3B8Q1	Sodium/potassium-transporting ATPase subunit alpha-2	17626.6	12077.2	9651.34	7576.46	14827.4	12986.1	15251.5	12531	13615.2	11783.3	5775.79	9341.97	11472.5	11728.6	14775.5	10551.3
YQLSIHER	Q3B8Q2	Sodium/potassium-transporting ATPase subunit alpha-2	11003.9	4427.85	4238.25	2932.47	6707.4	6073.6	6567.18	6708.36	6416.38	6180.2	2226.64	3119.23	5234.91	8009.2	7504.17	4778.15
SPTWTALSR	Q3KR59	Sodium/potassium-transporting ATPase subunit alpha-2	9954.7	5615.5	7875.13	5739.12	6073.58	7332.91	11558.8	7933.73	8200.28	7261.8	N/A	4757.85	9284.08	4446.14	6225.66	4638.64
SPEFTHENPLETR	Q3KR86	Sodium/potassium-transporting ATPase subunit alpha-2	14635.9	9554.94	11318.3	8391.88	26193.2	26929.8	15978.4	12392	8609.79	12842	15322.7	22916.8	12578.3	26363.3	24839.8	11104.3
FDTDELNFPTEK	Q3KRE0	Sodium/potassium-transporting ATPase subunit alpha-2	24104.9	10368	10069.4	6645.79	17927.5	17751.3	16047.6	16271.3	14810.1	10477.6	6840.45	13875.2	13073	18270.3	23467.9	13154.1
VLGFCQLNLPSGK	Q3KRE8	Sodium/potassium-transporting ATPase subunit alpha-2	21951	10989.1	12007.8	6406.55	18928.2	19192.6	17779.1	16186.1	16889.9	10948.4	9360.62	10616.3	14438.2	21503.4	34631.7	15182.6
DMTSEQLDEILR	Q3MHU5	Sodium/potassium-transporting ATPase subunit alpha-2	8311.89	6547.5	8316.63	4758.43	11309.1	10838.1	8344.28	11961.9	2762.3	5964.84	6727.43	10469.4	6399.87	16744.7	18026.9	8574.21
ADIGIAMGISGSDVSK	Q3MIE4	Sodium/potassium-transporting ATPase subunit alpha-2	3547.03	1968.43	2728.85	2830.39	4148.85	3199.31	3338.54	3314.44	1207.56	2807.28	2481.84	N/A	3301.05	4031.6	3106.93	2585.34
KADIGIAMGISGSDVSK	Q3SWS9	Sodium/potassium-transporting ATPase subunit alpha-2	4241.14	2703.56	5533.64	4655.12	5241.8	4942.07	5228.1	6989.6	2917.3	3957.56	3650.29	3131.31	4184.9	6650.48	4669.61	3491.11
GGQDNIPVLK	Q3SWU3	Sodium/potassium-transporting ATPase subunit alpha-3	733899	637845	712360	556328	656698	784977	671078	656003	666419	550952	681255	787350	632689	805018	785665	751394
CATILLQGK	Q3T1I4	Sodium/potassium-transporting ATPase subunit alpha-3	278613	231955	255485	203051	283231	267987	253984	194815	247795	221427	249541	251070	248282	266761	286068	238821
SPDCTHDNPLETR	Q3T1K5	Sodium/potassium-transporting ATPase subunit alpha-3	81766.8	61667.9	90305.7	50899.3	97122.5	97207	73775.9	70185.8	68889	60399.9	74439.1	101857	59436.7	83806.1	84036.7	63203.9
YQLSIHETEDPNDNR	Q496Z0	Sodium/potassium-transporting ATPase subunit alpha-3	135985	112487	140926	130589	147666	124630	131049	123283	121895	114261	125647	144753	140021	162725	164070	136639
EAFQNAYLELGGLGER	Q497B0	Sodium/potassium-transporting ATPase subunit alpha-3	160451	95634.2	76908.7	48239.5	97328.6	124408	75288.6	119249	114549	65257.6	88382.5	111551	83816.5	96818.6	117355	106779
ACVIHGTDLK	Q498U4	Sodium/potassium-transporting ATPase subunit alpha-3	75110	54318.2	66939.2	49414.9	79123.9	55412.1	55457.1	65070.7	49859.9	39180.4	68772	72433.9	52189.8	85972.5	89123.8	64344.7
YNTDCVQGLTHSK	Q4AE70	Sodium/potassium-transporting ATPase subunit alpha-3	31279.8	27383.2	30589.2	26318.2	30402.3	36438.9	28365.4	30838.3	24808.2	24695.1	30505.3	38533.7	24795.8	33301.2	36822	23760.5
KVAEIPFNSTNK	Q4AEF8	Sodium/potassium-transporting ATPase subunit alpha-3	4265	3076.96	3308.73	3228.74	3668.12	4337.33	3880.76	3787.44	2871.43	3179.25	3034.29	4360.31	3422.27	3458.03	3829.49	3823.17
TVNDLEDSYGQQWTYEQR	Q4FZT0	Sodium/potassium-transporting ATPase subunit alpha-3	4216.78	10006.2	20150.9	12197.8	13313.7	14027.8	17604.2	16363.8	13928.2	11707.6	8454.67	16183.2	13702.6	6281.22	7341.27	9751.7
MQVNAEEVVVGDLVEIK	Q4FZT2	Sodium/potassium-transporting ATPase subunit alpha-3	13350	11499.9	9548.85	7632.75	15221.5	14329.2	17936.8	15772.9	10118.2	7955.98	30010.8	17892.8	9114.12	16373.4	27872.4	9732.67
RDVAGDASESALLK	Q4FZT9	Sodium/potassium-transporting ATPase subunit alpha-3	18058.9	8050.8	9768.84	8308.38	11983.8	21913.8	9554.55	9711.6	16195.5	7263.17	9984.57	23456.5	8780.11	19532.5	21064.2	10104.6
NITFFSTNCVEGTAR	Q4FZU2	Sodium/potassium-transporting ATPase subunit alpha-3	118462	37744	36373.2	28380.2	38498.3	33904.2	39860.4	42262.7	103983	25506.5	59872.9	74569.2	42481.1	66210.7	68046.6	100022
DVAGDASESALLK	Q4FZU8	Sodium/potassium-transporting ATPase subunit alpha-3	734050	569545	323039	236620	349792	368118	291352	615442	580310	231946	384328	784886	524785	723585	820462	674435
CIELSSGSVK	Q4FZX7	Sodium/potassium-transporting ATPase subunit alpha-3	N/A	7395.89	4252.03	4517.64	5240.74	N/A	4751.17	6546.57	N/A	5374.66	6387.11	5619.88	5658.17	N/A	7043.44	8694.85
ADIGVAMGIAGSDVSK	Q4G061	Sodium/potassium-transporting ATPase subunit alpha-3	42392.1	27958.5	31568.7	27531.1	25837	29602.7	30027.3	39551.2	21625	22666.6	65822.5	29991.5	26767.2	37344.6	42879.9	22423
KADIGVAMGIAGSDVSK	Q4KLF8	Sodium/potassium-transporting ATPase subunit alpha-3	52126.6	30297.4	43811.2	47510.1	40244.7	33054.3	30413.6	40860.9	30436.8	33185.8	57299.1	40168.7	38949.2	57538.3	36166.1	36802.7
IATLASGLEVGK	Q4KLH4	Sodium/potassium-transporting ATPase subunit alpha-3	637786	597788	695540	501570	670189	681169	624095	634942	590156	499685	644124	778017	527758	833118	863975	680762
KYNTDCVQGLTHSK	Q4KLL0	Sodium/potassium-transporting ATPase subunit alpha-3	7421.29	3794.66	6590.19	4217.24	7354.3	3673.08	6229.3	3506.45	8735.08	3050.67	3393.52	7215.6	2200.96	4309.06	7170.26	4313.44
DFTSEQIDEILQNHTEIVFAR	Q4KLL4	Sodium/potassium-transporting ATPase subunit alpha-3	6498.54	4957.47	3312.03	2730.66	3308.46	2040.82	3885.39	3422.81	9516.65	2096.67	5896.79	7433.7	4102.44	6110.16	1716.57	3637.64
VLGFCHYYLPEEQFPK	Q4KLZ6	Sodium/potassium-transporting ATPase subunit alpha-3	38421.9	34536.6	39704.2	14502.6	44473.7	31905	38316.1	39898.5	62987.4	23827.1	38558.8	37685.5	18156.6	40426.6	13971.9	24462.5
EQPLDEEMKEAFQNAYLELGGLGER	Q4KM49	Sodium/potassium-transporting ATPase subunit alpha-3	687.804	322.224	232.928	388.993	N/A	N/A	804.729	958.357	686.599	253.518	596.868	829.389	567.045	N/A	N/A	690.414
MAAFILR	Q4KM73	Beta-glucuronidase	13745	10551.4	11706.8	7610.84	8939.39	10930	6707.66	8054.32	14324	6535.22	11143.2	11313.5	8841.89	13577.7	10054.2	12161
LTPEEIER	Q4KM74	Endoplasmic reticulum chaperone BiP	54796.2	43472.7	45691.5	34659.8	46606.2	55077.8	42461.3	36100.7	35414.9	37522.6	39360.7	44374.9	33921.3	41627.6	44562.1	40928.2
ITPSYVAFTPEGER	Q4QQT4	Endoplasmic reticulum chaperone BiP	49277.2	33044.4	31493.8	20319	38183.6	34652.9	27665.9	27158.9	32794.5	31097.2	29681.4	31278.8	26001.7	24064.2	36199.6	32471.2
SQIFSTASDNQPTVTIK	Q4QQW4	Endoplasmic reticulum chaperone BiP	23250.3	13409.4	14386.2	9281.99	15292.9	15761.4	14675.5	16852.8	37258.3	11912.6	12354.3	16392.5	16910.2	17474.9	45429.1	19505.5
NQLTSNPENTVFDAK	Q4QR85	Endoplasmic reticulum chaperone BiP	88403.1	30689	28557.5	19870.3	29430.5	32437.1	26466.4	30917.7	32126.7	24685.2	22873.1	31915.4	29433	70587.7	78740.3	37572.8
SDIDEIVLVGGSTR	Q4QRB4	Endoplasmic reticulum chaperone BiP	29969.8	12369.7	10390.7	5902.09	20124.9	26659.5	10333.7	22674.2	24616.7	8250.87	9968.32	15242.4	10807.6	25656.2	30415.7	24169
KSDIDEIVLVGGSTR	Q4V7A0	Endoplasmic reticulum chaperone BiP	46978.4	18400	35672.5	11893.3	34541.4	42412.7	34191.5	36506.6	39786.1	13760.9	28905.2	42069.9	17685.2	43606.5	36262.4	34961.9
TKPYIQVDIGGGQTK	Q4V7C6	Endoplasmic reticulum chaperone BiP	41908.6	32149.6	46008.6	20638.2	40550	31654.3	44920.1	31334.5	43260.3	24740.8	36012.5	22040.2	21700.9	51931.4	45110.3	49995.4
NELESYAYSLK	Q4V7C7	Endoplasmic reticulum chaperone BiP	43331.3	32979.4	34919.8	23624.3	49564.3	37673.4	31369	33821.2	37946.9	27199.5	30404.5	31417.9	34271.9	41682.8	51823	46482.8
ELEEIVQPIISK	Q4V7D2	Endoplasmic reticulum chaperone BiP	41700.9	33257.5	30712	14363	37751	42208.8	25088.7	34179.6	39738.6	16812.7	32004.2	44372.2	29755.4	41896.1	67805.4	38903.6
TWNDPSVQQDIK	Q4V8B0	Endoplasmic reticulum chaperone BiP	11104.2	6790.25	11450.5	8538.16	7225.34	9323.6	12072.5	12749.3	11259.2	9212.51	3788.95	8311.67	13777.6	6404.31	8837.71	9444.79
FEELNMDLFR	Q4V8C3	Endoplasmic reticulum chaperone BiP	4032.7	4653.56	5629.52	2862.56	6255.14	6575.44	4381.89	6826.87	N/A	3304.41	9705.34	5436.77	4289.96	9649.2	9734.72	3778.56
VTHAVVTVPAYFNDAQR	Q4V8C7	Endoplasmic reticulum chaperone BiP	30265.8	20449.3	12643.6	10116.5	27538.2	25837	29930.2	25095	32801.6	11823.9	24612.4	19979.7	15139.6	30703.3	30091.8	33322.8
DAGTIAGLNVMR	Q4V8C8	Endoplasmic reticulum chaperone BiP	42906.7	34332.4	42510.3	33183.9	49481.6	48617.5	21899.2	45442.6	27760.4	14669.9	54785.9	42220.3	31387.4	62727.9	43922.8	36476
DNHLLGTFDLTGIPPAPR	Q4V8F9	Endoplasmic reticulum chaperone BiP	60429.3	34554.7	39966.4	14713.6	51308	73068.8	41202.4	46187.5	64023.6	28878.1	47145.3	45679	20529.6	70096.5	98652.3	51841.4
AKFEELNMDLFR	Q4VSI4	Endoplasmic reticulum chaperone BiP	N/A	2125.37	4076.78	1933.97	2074.94	1370.43	2644.32	2778.18	N/A	1239.44	2965.89	2258.55	1448.4	3958.48	N/A	1879.16
GAVSPVGVQPILNK	Q505J6	Haptoglobin	5330.43	9259.97	5109.54	875.538	652.597	2594.54	681.834	4720.89	1145.68	476.003	2802.62	4286.05	3433.97	4186.88	N/A	6387.58
TPAQFDADELR	Q505J8	Annexin A1	20451.8	4597.08	4496.48	3598.09	5992.98	5867.58	16389.5	18034.8	14525.6	12335.2	1948.62	6099.99	19104	20891.5	15671.3	3298.94
GVDEATIIDILTK	Q505J9	Annexin A1	4589.84	747.241	N/A	266.328	1036.56	N/A	2090.91	5476.42	3449.16	1428.83	N/A	1547.6	2494.3	5926.8	16144.6	N/A
GTDVNVFNTILTTR	Q53E76	Annexin A1	13429.7	1229.3	730.916	587.5	N/A	1222.69	5879.18	9077.05	10831.1	5289.6	N/A	N/A	7820.96	13835.8	13047.4	921.415
NALLALAK	Q561S0	Annexin A1	11710.9	1112.72	801.198	1361.1	984.664	1233.4	8694.48	11165	8181.71	7148.24	N/A	2055.27	9697.36	12311.1	8513.84	N/A
IILPEGAK	Q562A2	Dolichyl-diphosphooligosaccharide--protein glycosyltransferase subunit 1	30423.6	19538.7	22806.7	20697.6	24421	28062.4	26961.2	27715	27452.6	19723.2	22039.5	29403.2	19063.5	24570.4	23373.2	20080.5
LPVALDPGSK	Q562B5	Dolichyl-diphosphooligosaccharide--protein glycosyltransferase subunit 1	37449.1	29579.5	26487.3	25938	30615.6	36212.6	30066.6	35140.8	28109.6	26163.3	28258.8	35489.8	28838.6	29418.3	30606.2	29736
SEDILDYGPFK	Q56A18	Dolichyl-diphosphooligosaccharide--protein glycosyltransferase subunit 1	19254.1	15011.7	10761.3	6804.28	19206.8	17944.6	12108.8	15714.8	16810.6	9058.95	15867.6	15527.9	12228.6	18113.3	28448.1	17118.5
NIQVDSPYDISR	Q56A27	Dolichyl-diphosphooligosaccharide--protein glycosyltransferase subunit 1	9908.92	9693.69	7226.46	7170.09	8887.61	8482.92	9448.71	8758.81	8929.06	7281.93	8263.79	8502.44	8318.05	8102.04	8065.7	8771.4
DIPAYSQDTFK	Q5BJ92	Dolichyl-diphosphooligosaccharide--protein glycosyltransferase subunit 1	9855.69	11909	9382.24	7270.04	10043.4	10138.7	9142.74	10846.7	12384.7	9678.92	10870.5	7776.7	10012.9	9122.3	12339.5	10512.2
TVDLSSHLAK	Q5BJT2	Dolichyl-diphosphooligosaccharide--protein glycosyltransferase subunit 1	5995.35	4397.61	2155.44	3782.94	4706.83	5910.18	4299.05	6621.88	4339.9	4291.35	4651.07	6727.07	3911.71	5564.99	3077.53	4489.96
TILPAAAQDVYYR	Q5BK32	Dolichyl-diphosphooligosaccharide--protein glycosyltransferase subunit 1	6727.65	5002.29	3725.28	3976.57	4399.22	4822.84	5574.26	5755.91	6257.67	4685.99	4728.31	4244.45	5596.74	5023.7	N/A	5924.79
VTAEVVLAHPGGGSTAR	Q5BK63	Dolichyl-diphosphooligosaccharide--protein glycosyltransferase subunit 1	3477.92	5392.6	3673.06	3789.71	6449.49	6688.88	4267.34	3794.91	4254.42	3917.64	3181.11	N/A	3663.8	6744.16	3443.02	3383.33
AVTSEIAVLQSR	Q5BK68	Dolichyl-diphosphooligosaccharide--protein glycosyltransferase subunit 1	25545.8	18853.8	20358.8	7604.39	18656.4	23556.5	18207.9	22525.9	22642.7	16823.7	18177.7	22002.7	19648.5	29298.5	26985.1	20231.3
ASSFVLALEPELESR	Q5BK81	Dolichyl-diphosphooligosaccharide--protein glycosyltransferase subunit 1	15356.8	7500.25	6433.95	3288.28	10370.6	11208.3	6891.76	11282.6	13537.7	5987.79	10609.8	11377.1	6412.62	14338.2	24460.1	10326.9
VACITEQVLTLVNK	Q5EB77	Dolichyl-diphosphooligosaccharide--protein glycosyltransferase subunit 1	4898.92	3175.26	2729.13	948.594	3137.69	4511.98	2863.67	3378.2	4694.71	2679.39	3533.47	2673.71	4094.32	6138.78	6194.77	3870.47
IDHILDAL	Q5EB81	Dolichyl-diphosphooligosaccharide--protein glycosyltransferase subunit 1	1837.16	2178.14	1777.72	1301.09	1348.13	3102.05	1394.1	1631.57	1932.08	1480.62	N/A	N/A	1933.41	3734.89	2479.98	1756.94
LGAEVYHTLK	Q5EBA1	Gamma-enolase	47420.8	37153.4	39206.9	33947.3	43348.4	45414.6	45232.6	44250.5	40661.1	61208.2	43295.4	33293.4	41259.5	51615.2	48127	48961.3
IEEELGEEAR	Q5EIC4	Gamma-enolase	232416	224023	24997.2	14493.1	29010.6	62047.2	42313.7	44865.2	185342	45022.9	31876.9	50701.5	20968.7	50362.7	41518.6	34294.2
VNQIGSVTEAIQACK	Q5EXX3	Gamma-enolase	148443	140212	134415	89119.6	128049	126550	107228	124769	141074	89098.6	110464	162650	122037	147591	174069	151924
DGKYDLDFK	Q5FVC2	Gamma-enolase	15831.9	12016.6	14099	11738.2	15840.9	12130.6	10282.8	10359.2	12794.6	8972.77	13039.1	13392.1	11571.9	14778.2	16931.4	19532.7
AVDHINSTIAPALISSGLSVVEQEK	Q5FVF1	Gamma-enolase	211144	75462.9	94290	34117.8	81271.6	110669	80461.2	88886.2	206208	56092.7	118381	100528	83392	194944	330128	118928
FTANVGIQIVGDDLTVTNPK	Q5FVH2	Gamma-enolase	3712.88	2937	2384.38	1719.51	1907.1	N/A	1453.2	952.76	4769.38	1554.03	2596.27	1775.8	1111.83	2307.85	N/A	2050.72
CITGDQLGALYQDFVR	Q5FVI6	Gamma-enolase	9526.2	3596.65	2504.8	1108.06	2488.88	3012.22	2230.39	3217.55	7448.92	1655.27	2026.19	2961.76	3070.36	5640.8	4861.18	3053.91
DATNVGDEGGFAPNILENSEALELVK	Q5FVJ0	Gamma-enolase	37655.7	12948.6	24804.1	10020.2	44296.6	64154.7	18740.3	34326	37280.2	10019.1	38001.1	43504.5	24959.8	51511.9	143311	35117.2
LAMQEFMILPVGAESFR	Q5FVJ8	Gamma-enolase	20222.8	9885.44	15570.2	5363.94	41389.6	18153.2	10044.2	24644.4	13670	5812.08	47822.2	17314	10571.7	34122.5	58689.5	13948.4
LDNLMLELDGTENK	Q5FVL2	Gamma-enolase	5661.09	4351.08	29923.2	7474.31	16564.5	25930.2	28300.7	39389.6	26008.9	1905.43	26297.6	23740.3	5021.11	49132	45806.7	32635.5
MVIGMDVAASEFYR	Q5FVM4	Gamma-enolase	19800.9	8065.08	12390.2	6329.99	23855.4	16114.9	7539.63	12793.7	10571.5	5742.57	25528	15860.4	14482.1	26871.9	22803.5	18820.8
GTGGVDTAAVGGVFDVSNADR	Q5FWT7	Creatine kinase B-type	442893	359657	320437	161840	339891	397499	257425	302499	395576	201960	314072	376157	233933	305722	477033	400100
LAVEALSSLDGDLSGR	Q5GFD9	Creatine kinase B-type	478189	135439	104570	81471.9	147570	123466	119711	132498	176893	88969.6	94363	148310	84424.9	176641	262347	171155
GFCLPPHCSR	Q5HZA6	Creatine kinase B-type	39987.5	75551.7	63124.1	56238	59379	54617.5	51425.1	33566.1	50313	62441.2	38548.1	24191.7	65080.2	33291	43025.7	82125.1
LGFSEVELVQMVVDGVK	Q5HZE4	Creatine kinase B-type	45636.8	12741.9	14243	6419.56	32751.9	19699.7	20644.3	24733	23670.1	6629.29	67438.8	33355.7	13344.7	36058.5	55665.2	19010.8
VLTPELYAELR	Q5HZV9	Creatine kinase B-type	1.29265e+06	392301	507975	256742	519152	509783	393423	422035	1127271	288808	468348	483937	301654	1.15323e+06	1.68856e+06	1.15302e+06
LEQGQPIDDLMPAQK	Q5HZY2	Creatine kinase B-type	71217.1	62653.7	70128.8	57702.4	125280	69497.9	41675.4	63950.8	55934.9	43989.3	138431	59869.3	64548.2	102244	72564.1	65391
FCTGLTQIETLFK	Q5I0D1	Creatine kinase B-type	343177	73873.7	141468	46498.6	136106	171738	91690.7	222653	382493	63980.9	173125	109501	197372	469059	350372	297606
LLIEMEQR	Q5I0D5	Creatine kinase B-type	123598	96703.6	139053	120603	122194	104935	65372.4	113647	116252	87138.2	338463	108779	91287.8	264140	113904	94571.9
DLFDPIIEDR	Q5I0D7	Creatine kinase B-type	1.33787e+06	513168	762808	246030	1.13413e+06	1.68144e+06	547083	785846	1.53715e+06	389910	1.07082e+06	947158	660881	1.58345e+06	3.0634e+06	1.28757e+06
TDLNPDNLQGGDDLDPNYVLSSR	Q5I0E7	Creatine kinase B-type	680882	462699	574858	213376	750628	972321	396224	629830	551613	357216	760429	729886	455235	620201	1.91755e+06	837928
RGTGGVDTAAVGGVFDVSNADR	Q5I0G4	Creatine kinase B-type	69221	66135.9	64557.2	57871.3	73484.3	60719.2	54217.9	65433.7	58842.5	46477.6	49285.4	64297.5	57691.6	57035.7	67277.8	81056.2
AYGENIGYSEK	Q5I0K5	Sodium/potassium-transporting ATPase subunit beta-1	96912.9	75033.6	45332.6	38815.3	51453.4	58196.7	49472.9	49560.9	78342.9	40998.5	54203.3	59774.9	42902.8	62423.9	71819.8	54627.3
FIWNSEK	Q5I0K7	Sodium/potassium-transporting ATPase subunit beta-1	44654.8	32036.5	34596.8	25556.6	31916.1	41921	38805.3	35861	51247.9	26997.4	15672.6	40299.9	44213	30952.3	39004.8	34875.5
VAPPGLTQIPQIQK	Q5I6B8	Sodium/potassium-transporting ATPase subunit beta-1	105359	77089.1	59668	47540.5	66103.4	63484.3	65066.4	60970.3	79392.9	56685.7	58343.3	61205.1	51152.2	49276.4	84803.8	89186.2
EGKPCIIIK	Q5M7A7	Sodium/potassium-transporting ATPase subunit beta-1	6331.2	5534.08	5443.55	4361.93	7194.03	5196.43	5555.45	5435.23	4973.57	6277.88	6512.25	6187.59	5562.5	6501.13	8345.41	5318.9
YNPNVLPVQCTGK	Q5M7U6	Sodium/potassium-transporting ATPase subunit beta-1	167740	84703.2	68792.3	61433.6	85244.8	77037.2	69616.9	156763	156538	66628.2	74496.4	149826	139245	154371	177208	180829
SYEAYVLNIIR	Q5M7V8	Sodium/potassium-transporting ATPase subunit beta-1	97384.4	52623.4	54744.2	12997.5	73969.7	69871.2	39316.6	53477.9	83882.7	30326.8	55924.8	51682.7	46457	82632.3	57047.2	66683.7
DDMIFEDCGSMPSEPK	Q5M7W5	Sodium/potassium-transporting ATPase subunit beta-1	5901.95	3045.68	7922.93	5952.83	7391.12	6114.38	2342.86	8328.9	2264.89	3706.27	15090.6	6504.12	5980.65	24635.2	5534.69	5323.63
SLGVGFATR	Q5M819	Fatty acid-binding protein, heart	7804.8	7673.28	7175.29	6615.52	7584.13	9660.92	7810.61	8220.97	9758.64	6350.44	8903.64	8372.05	6898.99	8900.38	N/A	9821.4
DGVANVSIEDR	Q5M9G3	Superoxide dismutase [Cu-Zn]	24714.7	23967.1	19680.2	14808	21034.1	16961	18805.8	20942.5	19658.6	18006.1	20311.5	24005.6	17230.8	22939.1	27190.5	20477.7
VISLSGEHSIIGR	Q5MPA9	Superoxide dismutase [Cu-Zn]	10056.5	6152.56	6322.23	2789.43	6115.04	6072.93	7595.58	3608.22	10052.1	3740.94	4924.03	5763.51	3775.11	9261.14	6916.02	8254.3
GDGPVQGVIHFEQK	Q5PPH0	Superoxide dismutase [Cu-Zn]	4052.93	3982.82	3652.33	4038.98	3882.97	5132.18	5036.56	4150.65	4909.23	3023.29	3151.51	3915.74	4143.97	5119.79	3711.6	4660.62
HVGDLGNVAAGK	Q5PPJ9	Superoxide dismutase [Cu-Zn]	187.979	888.177	N/A	287.236	N/A	318.445	648.015	368.395	462.289	638.481	129.586	608.95	487.409	207.016	N/A	710.067
EPLGFVK	Q5PPL3	Synaptophysin	143520	112335	109953	93044.9	96419.2	139415	113635	93433.4	112124	91274.6	115554	121099	102243	133852	116610	124129
MATDPENIIK	Q5PPM7	Synaptophysin	71496	83111.9	88022	65390.3	77522.8	91858.2	106974	82485.7	45327.8	60754.2	214077	77155.8	62978.9	180507	130394	62379.2
LHQVYFDAPSCVK	Q5PQJ6	Synaptophysin	98045.5	84092.9	77821	83587.4	81822	88005.4	92144.7	68514.5	105633	81267.7	87274.7	89731.8	79153.6	91921.9	91688.5	101939
MDVVNQLVAGGQFR	Q5PQP9	Synaptophysin	46700.7	15750.7	29989.5	7658.05	37096.9	56434	20552.6	39828.6	41071.3	10219.2	99201.2	30476.7	30205.2	59395.1	165739	37797.9
GELLEAIK	Q5PQQ2	Superoxide dismutase [Mn], mitochondrial	16766.4	13820.6	14188.3	10123.3	14527.7	16002.7	15727.2	12239.2	13874	11477.6	13641.4	18198.7	11971.8	18383.1	16962.9	12780.3
GDVTTQVALQPALK	Q5PQX1	Superoxide dismutase [Mn], mitochondrial	20788.6	20185.3	18089.9	6573.11	17698	15563.9	14133.6	21180.1	21434.8	12394.8	17423.6	21510.9	13165.7	17902.4	22339.9	19492.1
RQDLFIVSK	Q5RJQ4	Aldo-keto reductase family 1 member B1	14331.5	8974.57	9619.62	9464.08	10365.6	8691.16	10187.8	14906.7	16671.9	10004.3	10252.5	9951.12	13414.5	14677.7	9716.3	12214.6
SPPGQVTEAVK	Q5RJR2	Aldo-keto reductase family 1 member B1	52107.7	29996.4	11581.9	7024.72	16735.4	24961	24365.4	27923.9	40042.5	19046.3	12464.9	20675.1	14145.9	24123.6	28655.7	17273.7
NLVVIPK	Q5RJR8	Aldo-keto reductase family 1 member B1	24356.6	26115.7	14705.3	12219.1	15563.2	36198.8	18368.9	17863.9	31165.5	17969.3	13660.7	33648.7	19485.9	21390	21653	16876.4
AIGVSNFNPLQIER	Q5RK09	Aldo-keto reductase family 1 member B1	121169	29610.7	28117.9	13101.3	69867.4	96123.7	33524.2	116822	203606	24475.4	30217.4	81426.1	41005.2	95650.4	212742	85076.4
DYPFHAEV	Q5RK27	Aldo-keto reductase family 1 member B1	14289.5	10957	8976.22	6346.5	10267.1	11197.3	10634.6	14255.2	17612.6	11832.5	10490.3	9413.24	11916.6	10444.1	14477.7	11754.1
QDLFIVSK	Q5RKH0	Aldo-keto reductase family 1 member B1	6980.63	4438.53	2922.74	2495.54	4538.42	4545.86	4474.68	5639.21	8466.9	4286.72	3435.38	4702.58	6217.03	5082.16	4604.22	4643.19
LCYNPDFEK	Q5RKH1	Glutathione S-transferase Mu 7	12980.8	12733.6	10892.6	10930.3	10079.7	9734.7	11659.4	15118.1	12423.6	10247.8	9653.75	11091.9	10154.5	12993.5	17651.2	13708.5
NQVFEATCLDAFPNLK	Q5RKI0	Glutathione S-transferase Mu 7	9029.47	3344.12	2286.8	1551.33	4527.5	3766.52	4510.11	7293.31	9570.55	1906.39	3738.62	6842.48	2451.7	7666.72	14389.9	8695.83
VDVLENQAMDTR	Q5RKI1	Glutathione S-transferase Mu 2	N/A	2333.25	1873.89	1656.35	1976.47	2218.07	1424.89	3548.44	2043.97	2673.06	N/A	2196.41	4565.11	5964.41	N/A	1564.01
FTDEYQLYEDIGK	Q5RKI8	Calcium/calmodulin-dependent protein kinase type II subunit beta	1731.88	1535.7	1636.64	1561.77	866.585	686.161	1214.83	N/A	2025.48	1395.54	1152.49	1185.26	1855.12	1199.34	N/A	1207.36
GIDLTQVK	Q5SGE0	Dihydrolipoyllysine-residue acetyltransferase component of pyruvate dehydrogenase complex, mitochondrial	39171.1	31791.7	31856.9	25523.8	35080.6	36441.2	34061.6	30889.7	31135.4	25618.5	31681.1	37396.3	27397.8	37940.3	38462.6	36827.2
DIDSFVPTK	Q5U1Z0	Dihydrolipoyllysine-residue acetyltransferase component of pyruvate dehydrogenase complex, mitochondrial	40654.4	29228.6	29479.3	18921.9	35199.7	32000.3	27715.1	29880.1	32993.4	22573.4	37346.4	38466.5	24059.8	29865.3	33598.8	33621.9
VAPTPAGVFIDIPISNIR	Q5U211	Dihydrolipoyllysine-residue acetyltransferase component of pyruvate dehydrogenase complex, mitochondrial	13195.3	5084.47	7808.53	2683.64	10327	12047.8	7445.42	6603.27	10888.7	4229.68	15966.9	6676.25	6190.74	15686.3	31446	9910.31
AAPAAAAAAPPGPR	Q5U2N3	Dihydrolipoyllysine-residue acetyltransferase component of pyruvate dehydrogenase complex, mitochondrial	14957.6	17118.4	18554	10615.4	17827.4	19526.6	14060.4	16346.3	21617.4	14672.1	15535.4	18942.5	11788.2	27100.8	18902.5	13190.9
ISVNDFIIK	Q5U2N8	Dihydrolipoyllysine-residue acetyltransferase component of pyruvate dehydrogenase complex, mitochondrial	14533.6	11757.6	10702.1	4708.62	14461.6	17600.7	8455.67	11960.4	12481.6	8163.56	13146.5	14333.1	9186.33	13228.8	22133.9	12926.9
GLETIASDVVSLASK	Q5U2Q3	Dihydrolipoyllysine-residue acetyltransferase component of pyruvate dehydrogenase complex, mitochondrial	62845.6	15530.6	18253.7	6526.51	24398	27795.2	16759.8	22812.3	52597.7	11182.3	23048.8	25319.6	16065.3	33055.8	97713.7	24541
VFVSPLAK	Q5U2Q7	Dihydrolipoyllysine-residue acetyltransferase component of pyruvate dehydrogenase complex, mitochondrial	45710.8	39474.6	37234.3	29530.1	46399	48062.2	37784.3	36999.1	36795.9	29934.5	40967.2	43076.1	29251.6	41572.5	41427.6	37761
DVPLGTPLCIIVEK	Q5U2R0	Dihydrolipoyllysine-residue acetyltransferase component of pyruvate dehydrogenase complex, mitochondrial	28325.2	17916	19803.9	6993.67	20979.3	33920.9	16418.6	20991.6	29144.6	10610.3	30265.1	23684.9	13512.3	27632.3	94142.1	21210.8
GITFEDVR	Q5U2U7	Medium-chain specific acyl-CoA dehydrogenase, mitochondrial	12568.5	9531.76	11930.6	9353.97	11324.6	11640.2	10934.4	10645.9	10938	8614.07	10783.4	11689.1	9424.75	12119.3	11030.1	13052.2
ENVLIGEGAGFK	Q5U2Y1	Medium-chain specific acyl-CoA dehydrogenase, mitochondrial	10708.5	11202.9	11266.4	7855.49	9414.46	10091.6	7893.82	12642.8	8538.03	8029.69	10129.1	13928	8487.19	10702.9	11687.6	11170.4
NTYFASIAK	Q5U2Y6	Medium-chain specific acyl-CoA dehydrogenase, mitochondrial	5253.26	4588	5287.73	4318.35	5047.38	4620.25	4904.29	4731.43	4798.42	4622.23	6066.97	4840.15	5058.54	5294.91	5172.07	6082.62
IYQIYEGTAQIQR	Q5U2Z3	Medium-chain specific acyl-CoA dehydrogenase, mitochondrial	4416.49	3836.75	3626.55	1693.88	2916.84	2974.17	3159.8	4676.39	3957.42	3001.2	3853.4	3213.61	4193.82	4610.94	3656.09	4530.91
EEIIPVAPDYDK	Q5U300	Medium-chain specific acyl-CoA dehydrogenase, mitochondrial	14990.7	13193.2	13116.6	8449.26	15126.8	15799.9	12060.7	13403.2	12598.5	10007	15916.7	12612.6	11440	12025.2	14095.3	17032.6
SGEYPFPLIK	Q5XFW8	Medium-chain specific acyl-CoA dehydrogenase, mitochondrial	10378.7	8710.36	7915.49	4604.64	9431.32	10174.7	7871.53	9221.66	9510.89	6424.66	11401.5	6711.73	6139.9	9506.7	12671.9	10661.8
TRPTVAAGAVGLAQR	Q5XHY5	Medium-chain specific acyl-CoA dehydrogenase, mitochondrial	5241.57	5393.55	6844.55	6124.57	6049.36	6089.17	7428.55	4947.37	7298.2	5792.26	6108.27	4014.63	6064.42	7102.54	5022.6	5803.72
GQVYILGR	Q5XHZ0	Argininosuccinate synthase	43259.8	30699.8	30321.5	24912.5	35316.9	39457	42628.1	53506.9	56361.3	52541.4	30761.4	34901.5	54115.7	51757.9	45817.7	39803.8
VQVSVFK	Q5XI31	Argininosuccinate synthase	14970.9	7709.58	8524.73	9594.46	10335.2	9486.13	13367.8	19726.7	17534.4	14118.6	10172.4	9481.63	18316.8	14134.7	12276.6	8893.85
KVFIEDVSK	Q5XI32	Argininosuccinate synthase	2343.63	1478.62	1499.95	1180.08	1298.26	1923.4	2102.32	3437.72	2841.25	2804.41	1263.26	1652.7	2708.99	1971.83	2320.7	1709.5
QHGIPIPVTPK	Q5XI60	Argininosuccinate synthase	N/A	3203.15	4124.87	3498.38	4237.24	4279.27	6006.33	5647.63	8902.17	7206.17	4020.64	2985.1	7801.34	6628.68	6126.63	5398.57
APNTPDVLEIEFK	Q5XI72	Argininosuccinate synthase	25631.8	13151	10102.5	5007.7	12819	15504.7	11215.4	29583	21804.2	13919.8	12513.2	18044.1	18087.2	19607.9	36032.8	11106.8
FELTCYSLAPQIK	Q5XI73	Argininosuccinate synthase	2349.71	1173.67	1327.03	604.752	1971.31	1612.61	1403.8	2518.28	3525.46	1688.19	N/A	1088.93	3593.41	N/A	4349.98	2388.61
QVLFSADDR	Q5XI78	Fructose-bisphosphate aldolase C	355746	345728	328761	218761	366154	367565	288270	307195	334612	242598	300312	350709	281445	356022	418947	341635
DNAGAATEEFIK	Q5XI81	Fructose-bisphosphate aldolase C	290745	317431	335002	251001	323414	323867	240415	312800	259685	251142	334426	350101	245224	328153	363110	330325
DDNGVPFVR	Q5XI97	Fructose-bisphosphate aldolase C	205635	179638	142592	104275	189650	171217	149271	147844	172902	138116	175703	176824	133170	141741	202806	173221
LSQIGVENTEENR	Q5XIA8	Fructose-bisphosphate aldolase C	65607.8	55387.7	56722.3	42385.8	54538.7	69258.6	54039	62937.7	49118	51606.2	56793.3	71657.4	49840.9	76237.8	74110	57140.8
PHSYPALSAEQK	Q5XIC0	Fructose-bisphosphate aldolase C	25105.2	19485.7	18854	11824.4	25079	25302.8	17364.1	17089.2	18369.8	18349.6	20103	20893.7	13953.4	24884.5	28384.8	18125
GILVGIK	Q5XID0	Fructose-bisphosphate aldolase C	164354	94210	130054	91991.2	133479	142543	121777	120266	154608	95712.1	119839	118377	103685	171073	161334	139708
YSPEEIAMATVTALR	Q5XIE0	Fructose-bisphosphate aldolase C	30417.2	17156.6	16692	8557.59	23676.9	24947.1	12774.1	22923.7	31970.8	11018.2	40227.9	20630.4	15170	28780.9	44815.3	19614.7
KELSDIALR	Q5XIF3	Fructose-bisphosphate aldolase C	3988.79	3518.77	2748.2	2984.98	3156.7	2734.45	3094.91	3159.8	4561.47	3495.75	3562.46	4085.06	3829.48	3211.99	4236.04	4564.49
YEGSGDGGAAAQSLYVANHAY	Q5XIF6	Fructose-bisphosphate aldolase C	19428.5	9595.8	11203.4	8545.57	12940.7	10458.1	8750.97	11158.2	11838.3	8904	11721.4	9970.53	9112.21	12004.1	13649.5	13756.4
LSQIGVENTEENRR	Q5XIH7	Fructose-bisphosphate aldolase C	2163.87	5006.31	6016.84	6252.48	3209.49	6732.65	5902.71	3257.04	2190.47	5525.31	10699.6	5201.41	4489.37	2547.42	2902.22	1888.69
GVVPLAGTDGETTTQGLDGLLER	Q5XIK2	Fructose-bisphosphate aldolase C	183093	163691	134402	37580.2	142548	201974	88740.8	259021	189730	63300.4	291559	162777	167281	173323	704214	132810
TPSALAILENANVLAR	Q5XIM7	Fructose-bisphosphate aldolase C	138552	71727.4	107318	34022.6	145723	161481	95547.9	89843.9	197126	55700	137738	96345.4	90341	160033	254933	162954
TVPPAVPGVTFLSGGQSEEEASLNLNAINR	Q5XIM9	Fructose-bisphosphate aldolase C	5482.8	4376.07	3267.21	3043.46	3184.71	1997.07	2540.33	3235.37	10294	2204.34	6565.43	4083.09	2131.69	3011.92	19426.7	4933.8
GILAADESVGSMAK	Q5XIP6	Fructose-bisphosphate aldolase C	111511	79116.8	87836	75830.6	145581	147574	74018.2	134789	90676.2	60177	167557	125644	98237.8	357336	113734	107693
ELSDIALR	Q5XIP9	Fructose-bisphosphate aldolase C	489154	410501	398772	312990	427891	439264	353719	395991	482640	295462	388423	471563	312090	499092	516580	466877
ALQASALSAWR	Q5XIT1	Fructose-bisphosphate aldolase C	22266.6	18189.2	23185.2	16497.2	11437.9	18863.9	23563.3	22007.6	31164.3	15540.6	6823.97	16933.6	22806.7	17375.5	13893.3	17279.4
DNAGAATEEFIKR	Q5XIU9	Fructose-bisphosphate aldolase C	N/A	N/A	2357.99	3028.17	2955.84	1404.45	1028.99	904.3	548.349	1153.97	1264.71	1402.38	537.704	864.36	1752.36	1895.53
SENEEFVEVGR	Q60587	cAMP-dependent protein kinase type I-alpha regulatory subunit	4861.37	6604.65	7331.95	5148.13	6412.31	5498.68	5554.1	6290.74	5245	5326.85	7386.56	6481.29	5161.38	6545.87	6325.44	5701.02
LTVADALEPVQFEDGQK	Q62599	cAMP-dependent protein kinase type I-alpha regulatory subunit	5176.07	3050.35	2328.8	699.289	2882.67	2739.39	1105.05	3014.92	5114.07	948.765	3523.16	2988.48	1606.62	4163.47	7072.97	3802.97
VIILGDSGVGK	Q62634	Ras-related protein Rab-7a	57859.4	52948.2	53696.7	37595.9	50058.3	52608.6	54300.5	45612.9	53717.8	41338.9	49803.4	58866	40168.3	60813.7	52399.5	50815.7
ATIGADFLTK	Q62638	Ras-related protein Rab-7a	24140.8	21663.9	23945.5	18830.8	24302.6	24385.7	22597.2	25662.5	24045	16703.8	28597.6	26342.2	18090.1	22058.8	28830.1	22608.4
NNIPYFETSAK	Q62639	Ras-related protein Rab-7a	24030.5	23408.1	19518.4	15089.8	22323	23637.2	19157	25191.7	24703.2	16918.6	23347.9	22028.6	20060.4	24830.7	26509.5	25749.3
EAINVEQAFQTIAR	Q62688	Ras-related protein Rab-7a	21613.2	5929.87	4978.91	2507.35	5440.48	5403.7	4931.39	7196.68	16608.1	3095.57	5520.41	7338.27	4539.88	11257.2	12493.1	5889.21
GADCCVLVFDVTAPNTFK	Q62698	Ras-related protein Rab-7a	4832.1	2476.23	1877.98	972.525	2323.16	2324.46	1908.75	2562.44	5269.25	1798.82	2236.21	2783.63	1983.39	4307.76	6240.22	2656.32
DPENFPFVVLGNK	Q62717	Ras-related protein Rab-7a	50126	30419.2	29773.6	4774.1	41004.9	51947.1	28942.5	37374.4	51760.7	17677.5	38501.6	39458	26244.2	54832.1	122493	46166.3
DEFLIQASPR	Q62718	Ras-related protein Rab-7a	24854.6	18557.4	14013.1	10140.9	15611.4	16152.1	17178.5	18183.3	22182.2	12360.1	16601.8	19980	14442	17569.9	20396.6	19471.7
FQSLGVAFYR	Q62725	Ras-related protein Rab-7a	6503.59	5636.56	5973.94	4432.83	6840.16	5838.49	6303.91	4165.09	9069.49	5056.14	6678	3743.53	4663.79	4250.37	3329.46	5863.04
ACLYAGIK	Q62733	Glutamine synthetase	434003	285456	384722	302607	352902	365968	341615	359261	427961	280197	352451	315639	284720	376702	394686	367313
TCLLNETGDEPFQYK	Q62745	Glutamine synthetase	519339	459726	351378	236281	392810	384328	334909	430156	483405	316670	397670	440118	396189	403527	608538	531812
LTGFHETSNINDFSAGVANR	Q62764	Glutamine synthetase	660339	422163	529868	308929	414940	437558	452325	559483	703546	338287	374030	575373	393133	689626	637831	452653
TCLLNETGDEPFQYKN	Q62780	Glutamine synthetase	48229.6	12661.3	13597.5	9770.86	24366.9	14550.1	10743.3	15706.3	43364.3	6803.97	12894	14485.7	24123.5	28344.9	41906.5	48930.8
RPSANCDPYAVTEAIVR	Q62806	Glutamine synthetase	822353	509739	645907	393335	523769	596446	814452	728230	784206	370510	619882	755210	439867	720896	722519	995597
LVFCEVFK	Q62812	Glutamine synthetase	991126	714216	662707	417550	718622	789480	597912	731361	1.11782e+06	250619	754644	810932	541496	746521	852295	401136
MGDHLWVAR	Q62813	Glutamine synthetase	7499.54	11426.8	11132.1	6280.99	6312.44	10342.5	13415.6	10212.9	8823.7	6624.84	4310.54	9167.81	7933.4	9815.09	6970.39	5391.57
ITGTNAEVMPAQWEFQIGPCEGIR	Q62826	Glutamine synthetase	26113.6	22824.1	20747.5	12877.7	24837.6	35556	11440.6	27954.8	25307.3	17578.8	8572.64	24477.2	29234	23165.2	41959.1	20011.1
QMYMNLPQGEK	Q62829	Glutamine synthetase	9462.28	5774.21	4896.76	4813.14	4265.02	N/A	11152	5222.46	12852.8	8333.28	2178.73	7555.82	7186.86	6374.07	N/A	7608.95
IFVDIEK	Q62847	Glycogen phosphorylase, liver form	4339.51	4020.38	4641.16	3961.38	4771.5	3239.06	4718.54	4427.69	4401.42	3855.29	4254.19	5924.56	3998.82	3834.25	3766.31	3594.57
IVALFPK	Q62865	Glycogen phosphorylase, liver form	3582.19	2181.95	1721.83	2365.3	2492.54	3248.04	3273.16	3544.56	3192.88	2308.14	3096.39	2667.36	2631.35	2459.08	3193.54	N/A
GIVGVENVAELK	Q62871	Glycogen phosphorylase, liver form	3173.19	3200.55	3044.58	2543.83	2080.92	2923.25	4120.69	3614.47	3720.07	3277.89	2395.65	3796.82	3174.19	4041.71	N/A	2077.61
EYYEALPELK	Q62876	Glycogen phosphorylase, liver form	N/A	1294.89	1479.38	1780.55	935.599	1631.85	1822.76	771.32	1635.39	2047.61	1595.01	N/A	1882.5	2311.64	2084.62	N/A
VAAAFPGDVDR	Q62885	Glycogen phosphorylase, muscle form	6312.34	4809.12	4184.3	4766.51	5452.89	5203.3	6057.78	5018.86	4900.04	5957.64	4204.04	6191.38	6190.28	5404.88	4970.24	4722.03
GAVDGGLSIPHSTK	Q62888	60S ribosomal protein L5	16252	14770.1	13680.3	11154.3	13660.4	16081.2	12062.2	17077.4	17961.8	11194.7	15247.9	16547.7	13344.6	17763.3	14158.6	15220.6
TYATAEPFIDAK	Q62889	Synapsin-1	17068.8	18339.3	18074.6	13094	20982.7	19380.2	15344.3	16672.6	16123.6	14493.7	19867.8	15290.4	13955.7	17893.8	21129	21213.5
IHGEIDIK	Q62902	Synapsin-1	2356.55	1713.48	1871.51	898.455	N/A	1724.73	1610.96	1360.76	1274.59	1012.46	N/A	1504.66	1279.93	1602.23	2008.76	988.552
SLKPDFVLIR	Q62910	Synapsin-1	8312.93	13503.9	9822.57	6154.06	17950.4	16329.9	18478.5	8704.5	22509.7	7813.21	12659.8	14186.5	7904.78	19999.6	12708.7	16032.6
GSHSQTPSPGALPLGR	Q62915	Synapsin-1	22403.5	25157.1	23974	23168.7	19923.4	18886.3	25325.1	19974.3	15344.6	21933.1	20004.4	20234.6	23186.8	25612.2	26344.6	25577.4
VDNQHDFQDIASVVALTK	Q62927	Synapsin-1	18245.5	13989.1	13182.5	5954.12	15740.5	16215.4	10729.8	15066.4	19038.5	7263.55	13632.3	20082.1	11598	18896.6	33453.2	17270.2
EMLSSTTYPVVVK	Q62940	Synapsin-1	4960.69	5785.33	9219.92	6883.46	8471.44	6369.75	477.824	7546.79	1940.37	4924.73	10701.5	5196.13	6036.38	9057.68	1986.64	6195.26
GDEELDSLIK	Q62950	Histone H2A.Z	10586.4	12428.8	7465.21	6559.38	9356.62	13040.4	4640.82	11455.9	14652.8	8434.38	10802.9	11536.6	6684.64	11715.6	10168.3	7638.14
AQATPSQPLQSSQPK	Q62951	AP2-associated protein kinase 1	2115.26	1264.93	3065.77	1319.64	1982.69	3005.54	2901.19	2318.59	2122.39	1831.06	1573.98	3935.29	1742.03	3431.48	5122.17	1415.8
LTAEELLNK	Q62952	AP2-associated protein kinase 1	9485.53	4870.67	10920.7	5510.97	7763.01	6257.46	9192.61	6423.58	5448.33	6792.57	4708.46	8739.52	6623.24	10148.6	14525.2	4731.18
ATVQPLPQATGPSNQPSLLASVSQPK	Q62991	AP2-associated protein kinase 1	5531.96	2164.22	3306.4	1265.49	4023.21	3641.17	3051.72	2893.55	N/A	1847.66	3430.83	2983.12	2332.98	4098.03	5892.56	2825.44
VENILLHDR	Q63009	AP2-associated protein kinase 1	1599.77	2012.65	2506.69	1982.19	1221.7	2630.68	2637.6	1951.58	N/A	2384.44	1985.37	1930.56	2070.12	1974.3	2035.19	1980.95
EQGSSGLGSGSSGGGGSSSGLGSGYIGR	Q63016	AP2-associated protein kinase 1	N/A	1729.75	1289.92	1432.82	1716.39	1654.97	2330.35	1561.68	N/A	1628	1721.26	1211.9	1292.79	N/A	1337.96	1000.6
LTDPIPTTETSIAPR	Q63028	AP2-associated protein kinase 1	17834.6	13492.1	17430.8	10205.8	16824	13538.2	13181.7	14381.9	14076.8	10506.7	14363.3	19053.8	12831.5	16709.8	19400.1	17627.3
ECPVPNVQNSPIPTK	Q63041	AP2-associated protein kinase 1	4994.56	3577.41	3504.53	2757.23	3750.01	4003.07	3876.14	3505.82	4304.68	3080.36	3253.53	3689.05	3379.03	4064.63	4566.72	3867.32
VAEDEFDPIPVLITK	Q63081	AP2-associated protein kinase 1	4699.35	1466.05	4366.28	713.928	3905.71	4289.7	3443.38	2867.54	2055.18	1518.71	2322.7	3008.28	2371.16	5055.82	21530.2	2588.12
GHYVLCDFGSATNK	Q63092	AP2-associated protein kinase 1	1803.18	1771.01	2449.48	2732.46	1888.9	2078.63	3185.24	N/A	N/A	2781.63	3272.83	1854.07	2751.06	2920.21	2275.42	3220.93
AGQTQPNPGILPIQPALTPR	Q63100	AP2-associated protein kinase 1	N/A	5736.17	5595.62	1064.83	6171.63	9119.93	5276.36	4395.44	N/A	3478.37	5463.28	5019.9	3659.84	5040.22	13318.8	4301.36
TQTVLSELK	Q63151	Sarcolemmal membrane-associated protein	15101	16485.7	16460.5	10942.2	13888.9	13764.8	13912.1	10763.9	13794.3	11392.1	12826	14657.7	12189.7	15533.2	16223.1	14645.3
ELVEAQELAR	Q63198	Sarcolemmal membrane-associated protein	9342.53	10697.7	9090.12	6959.72	9525.69	8697	8902.16	8009.15	8068.79	7484.29	8651.06	9298.42	6986.18	8700.33	11174.2	7216.8
ENVLLSSELQR	Q63270	Sarcolemmal membrane-associated protein	49492.3	41578.7	49979.7	32002.1	38846	37089.5	41915.8	44564.3	39303	28516.5	37120	53271.1	35450.6	53672.1	51855	45286.4
SLQSTFQLR	Q63347	Sarcolemmal membrane-associated protein	9670.59	7862.1	8889.14	5878.05	8805.43	8397.19	8493.92	7883.92	8343.29	8092.16	7526.64	7318.18	7726.42	7210.91	10304.5	9318.44
AIEAAVLAR	Q63377	Delta-1-pyrroline-5-carboxylate dehydrogenase, mitochondrial	9628.47	7239.25	7613.24	6245.48	7338.74	8874.88	7080.57	6832.07	7775.93	6771.61	6626.52	8094.41	5788.63	9334.6	7644.62	8641.34
STGSVVGQQPFGGAR	Q63396	Delta-1-pyrroline-5-carboxylate dehydrogenase, mitochondrial	2862	3061.01	2973.33	2202.5	3505.47	2835.44	2861.54	3476.87	2561.8	2862.55	2693.92	3047.54	2840.95	3068.03	3399.39	3703.87
VANEPILAFTQGSPER	Q63398	Delta-1-pyrroline-5-carboxylate dehydrogenase, mitochondrial	1957.97	1721.36	1510.51	673.624	2077.2	2096.63	1367.27	1684.61	2256.41	1411.57	1479.05	1477.63	1354.1	N/A	3418.56	N/A
KPVDWGAASPAVQSFR	Q63413	Gamma-crystallin S	8235.66	10600.3	4008.61	22870.7	N/A	6489.46	16949	16661.5	70102.4	19750.5	N/A	21345.8	12964.8	4776.76	10552.2	N/A
SLGIVPLPLQR	Q63433	Microtubule-associated protein 1S	9705.5	4025.14	4152.54	1826.51	6583.8	8664.95	4259.66	5027.19	5296.72	2929.11	5459.73	3948.27	3686.8	9272.51	19531.2	6861.24
RPVVTTQDLEVPSR	Q63470	Microtubule-associated protein 1S	6255.59	7669.37	6791.73	6798.25	6705.38	6969.52	9076.22	5643.61	9604.51	5999.93	5939.27	7898.08	7131.43	6750.94	7619.54	7369.11
LLSPALGVVFLNAR	Q63507	Microtubule-associated protein 1S	708.239	425.12	1300.84	297.211	969.08	1529.92	982.633	441.051	2110.91	820.939	2419.54	637.278	643.339	N/A	N/A	937.379
GETLETLVLLNPSDK	Q63525	Microtubule-associated protein 1S	N/A	826.016	527.018	667.777	N/A	772.984	738.894	568.281	N/A	729.38	747.709	612.133	1131.85	755.828	1434.02	N/A
VELVAATR	Q63537	Protein tweety homolog 1	14040.3	11160.1	5279.81	3493.64	5764.37	8238.09	7714.67	6633.65	9558.21	4891.12	6106.91	7117.15	4702.18	6295.03	5719.56	6028.68
TELTTLEEVLSER	Q63560	Protein tweety homolog 1	5694.32	2321	2184.5	1068.59	3353.73	5473.84	1539.35	4016.15	5970.15	1451.81	3334.94	2396.79	2054.4	6046.72	5672.04	4927.23
ALASIHSQLQGLER	Q63564	Protein tweety homolog 1	4593.14	4290.62	3838.76	3560.04	3427.56	4421.61	5017.67	4668.19	4506.96	12969.8	3569.74	N/A	4380.32	4794.73	N/A	3611.55
ASIGNIALSPSPVR	Q63569	SH3-containing GRB2-like protein 3-interacting protein 1	6784.34	6012.51	6728.68	4276	6526.22	5280.9	6633.58	5576.8	6964.68	5509.51	3818.56	5838.26	5887.85	6986.84	10030.5	6095.85
ITFFEDR	Q63570	Gamma-crystallin B	33243.8	128251	48037.8	438152	30592.1	41658.7	53782.6	47602.1	725026	192975	24421.9	342458	19664	40929.7	77951.9	24587.8
GQMVEFTEDCPSLQDR	Q63584	Gamma-crystallin D	N/A	14670.4	7798.72	55032.7	4011.15	4502.84	3726.87	4559.19	42781.7	16461.3	3814.47	26019.3	2126.46	2383.72	6971.55	N/A
FEDENFILK	Q63598	Peptidyl-prolyl cis-trans isomerase A	165585	135252	98353.5	65056.1	114275	113833	105972	114154	179506	79233.6	122335	133727	90057.9	133108	154641	143263
VCFELFADK	Q63617	Peptidyl-prolyl cis-trans isomerase A	136174	87757.3	82375.6	56639.4	94985.4	85647.3	74936.4	116509	120574	52959.8	106244	115520	65911.2	119074	96389.6	96826.3
KITISDCGQL	Q63622	Peptidyl-prolyl cis-trans isomerase A	48393.6	46579.3	45141.3	35981.4	37875.8	40296.2	42310	51832.6	41199.8	27373.8	40772.1	55585.1	38151.4	52821.6	49638.6	46187.8
VNPTVFFDITADGEPLGR	Q63633	Peptidyl-prolyl cis-trans isomerase A	14750.3	7967.44	5720.44	4366.59	11103.6	5752.95	6704.65	12516.3	11244.9	5352.8	7381.48	8592.04	4800.22	15024.5	17720.3	9105.06
IIPGFMCQGGDFTR	Q63651	Peptidyl-prolyl cis-trans isomerase A	8517.38	7191.85	8392.32	4302.13	8394.7	8567.16	5753.98	9670.57	6984.32	5245.29	14412.6	7406.3	6690.46	11397.4	9752.91	9616.89
EFADSLGVPFLETSAK	Q63692	Ras-related protein Rab-1B	5692.18	3154.03	3588.32	590.275	4112.6	6222.36	3173.62	5368.95	5720.39	1571.35	6759.36	5151.19	3303.69	5959.26	19182.3	4910.14
MNPEYDYLFK	Q63716	Ras-related protein Rab-1B	5522.31	4369.23	4943	2570.28	7121.63	7025.05	2876.87	4911.36	3829.93	3328.56	8923.09	4968.98	4051.32	6844.46	8638.46	4756.97
VIVEIHGVGR	Q63754	1-phosphatidylinositol 4,5-bisphosphate phosphodiesterase delta-1	3709.45	2697.06	4480.5	1986.03	3971.32	4811.93	4816.64	3690.21	3971.69	2022.38	4002.15	3752.04	2024.24	5112.25	2674.31	3408.09
EEEAGPALALSLIER	Q63768	1-phosphatidylinositol 4,5-bisphosphate phosphodiesterase delta-1	3544.67	1477.93	1975.83	767.437	2536.92	2555.16	2039.79	2770.46	2077.26	1242.89	2656.62	2533.72	1718.61	2945.3	7243.31	2528.22
SPESQLFSIEDIQEVR	Q63945	1-phosphatidylinositol 4,5-bisphosphate phosphodiesterase delta-1	N/A	1177.68	706.536	541.053	425.735	N/A	1112.65	1936.53	1460.21	611.883	1024.42	N/A	1421.54	1495.01	2506.07	1428.92
AFEEAAGSAETLSVER	Q63965	1-phosphatidylinositol 4,5-bisphosphate phosphodiesterase delta-1	3016.3	2388.84	2549.33	1986.57	2122.78	1936.19	1931.03	3246.98	2746.89	1662.47	1986.99	1969.31	2739.01	2029.72	N/A	2104.16
IPVGPETLGR	Q64057	ATP synthase subunit beta, mitochondrial	1.35753e+06	1.21732e+06	1.17027e+06	947382	1.13358e+06	1.40389e+06	1.19968e+06	960759	1.14463e+06	1.00823e+06	1.08433e+06	1.3472e+06	977378	1.10974e+06	1.11647e+06	1.13188e+06
AIAELGIYPAVDPLDSTSR	Q64060	ATP synthase subunit beta, mitochondrial	542886	216409	339114	76144.5	368382	462622	240176	386045	471579	130622	446327	347295	259815	459971	1.41689e+06	452941
VLDSGAPIK	Q641W2	ATP synthase subunit beta, mitochondrial	278016	286609	295402	198377	303783	367967	280288	291704	251312	275050	285985	410587	198717	322068	319538	277160
FTQAGSEVSALLGR	Q641W4	ATP synthase subunit beta, mitochondrial	230446	158364	136602	84598.4	142138	178720	127606	167396	186919	98809.2	137352	183299	126976	250924	253850	191529
VALTGLTVAEYFR	Q641X8	ATP synthase subunit beta, mitochondrial	229464	117573	177462	65847.8	182840	210792	137548	123520	534655	106816	211784	105473	117011	247193	428526	187468
DQEGQDVLLFIDNIFR	Q641Y0	ATP synthase subunit beta, mitochondrial	4398.69	1421.77	1485.21	284.409	2501.62	2570.52	1185.79	N/A	2712.34	452.31	N/A	6391.77	951.308	4510.79	N/A	1136.95
LVLEVAQHLGESTVR	Q641Y2	ATP synthase subunit beta, mitochondrial	68231.4	55874.9	61962.6	56624.5	48918.9	44964.8	72093.1	54975.4	64568.7	57298.5	40423.7	50988.1	49908.1	60409.2	18997.6	56064.8
AHGGYSVFAGVGER	Q641Y5	ATP synthase subunit beta, mitochondrial	92864.2	68428.4	76857.3	69948.3	71414.6	62647.1	80966.9	65669.2	97589	66067.4	68822.5	64143.3	67643.4	86745.3	65298	93270.7
VALVYGQMNEPPGAR	Q641Y8	ATP synthase subunit beta, mitochondrial	100572	54149.2	108178	57708.1	106579	105527	34758.8	60786.2	65803.8	44702.3	143285	54031.6	51036.9	169850	163044	54327.8
TVLIMELINNVAK	Q641Z6	ATP synthase subunit beta, mitochondrial	55360.3	19977.4	30273	9902.41	56377.2	55465.7	20742.6	37016.5	62741.1	12086.4	49979.4	36940.9	25392.9	70188.3	60206.1	24284.7
IMNVIGEPIDER	Q64232	ATP synthase subunit beta, mitochondrial	88146	59575.7	69725.5	52746.5	70041.4	76113.2	50073.9	61442.1	52030.5	40072.1	130829	85715.2	66837.7	271105	84895.8	88362.6
IGLFGGAGVGK	Q642G4	ATP synthase subunit beta, mitochondrial	820125	655352	719292	515958	815161	780372	653649	633305	782506	549080	794204	679304	584987	971828	822098	740254
TIAMDGTEGLVR	Q64303	ATP synthase subunit beta, mitochondrial	103356	108264	114126	62948.9	114802	123141	70007.9	74623.8	78968.2	73030.1	267362	110052	126205	246577	157967	135595
IMDPNIVGSEHYDVAR	Q64428	ATP synthase subunit beta, mitochondrial	49001.7	29402.3	42949.9	36039.2	33386.3	51789.4	29689	40907.7	37148.5	27541.9	67035.1	46451.4	28826.6	75824.6	89243.1	43930.4
VVDLLAPYAK	Q64542	ATP synthase subunit beta, mitochondrial	525601	480711	416197	139337	510571	512284	427522	371767	509732	114040	458138	463521	322359	505560	647790	480325
EGNDLYHEMIESGVINLK	Q64548	ATP synthase subunit beta, mitochondrial	11384.3	15953.1	14434.7	7692.19	11126	11239.7	9455.33	12395.2	10468	9662.55	27662.7	14106.1	9841.18	15884.7	12093.3	11191.3
IPSAVGYQPTLATDMGTMQER	Q64559	ATP synthase subunit beta, mitochondrial	9792.33	16370.6	34168.4	13888.6	64752.9	58129.4	20136.9	48534.5	17049	9418.27	103783	21210.1	13451.5	63688	32940.5	39942.2
FLSQPFQVAEVFTGHMGK	Q64560	ATP synthase subunit beta, mitochondrial	12120.6	9489.64	17432.6	4824.81	17742	10879.1	13056.6	13618	7071.35	4541.86	26988.7	14132.3	5329.19	25428.8	N/A	13205.2
VAVVAGYGDVGK	Q64568	Adenosylhomocysteinase	104749	86638.1	82163.2	69471.5	87728.5	102280	91421	75131.4	107970	77475.1	84936.1	86557.7	78317.6	90107.5	85675.3	89149.2
IILLAEGR	Q64591	Adenosylhomocysteinase	113214	76233.1	84557.8	58458.5	85501.5	100466	74659.9	75194.1	85476.2	68217	76296	89290.5	61421.8	98416.5	72841.6	84320.9
GISEETTTGVHNLYK	Q64602	Adenosylhomocysteinase	9817.44	10895.6	11037.8	9320.94	10474.6	11755.3	11239.9	8409.18	11567	11616.6	9038.1	9373.53	10249.4	10274.6	11002.5	9566.43
HPQLLSGIR	Q64611	Adenosylhomocysteinase	23701	20805.4	19922.7	19391.4	16581.3	24412.7	25494.4	20669.2	29499	23672.5	20566.6	17542.2	23893.4	25912.8	16158.1	28901.2
WLNENAVEK	Q64640	Adenosylhomocysteinase	9900.37	5939.04	12365.1	9136.91	8165.59	8904.97	10235.7	2228.54	13928.4	11678.2	7318.81	8594.99	10629.2	10816.7	9881.83	11391.9
VNIKPQVDR	Q66H15	Adenosylhomocysteinase	4316.91	3173.41	5172.53	2239.63	4572.73	2751.43	3532.58	6112.56	4198.61	3818.35	3756.92	5731.48	2997.79	5103.7	4814.56	4538.77
KLDEAVAEAHLGK	Q66H20	Adenosylhomocysteinase	5653.27	3130.99	5031.07	3259.22	3960.96	4341.7	7723.98	4886.39	3446.81	3465.07	6092.07	7362.46	3039.72	6985.12	6194.55	3446.56
LDEAVAEAHLGK	Q66H61	Adenosylhomocysteinase	2230.76	1203.77	2809.44	1269.66	2609.15	2523.67	4153.91	2789.03	2140.76	1318.59	2816.66	1780	1497.88	2303.79	2717.79	2300.8
VPAINVNDSVTK	Q66H80	Adenosylhomocysteinase	66466.6	55834	48676.5	40666.7	58297.3	60773.6	52632.5	41892.6	59707.3	45690.5	47332.3	57224.5	40484.8	51460.7	55745.2	52696.8
VADIGLAAWGR	Q66HA4	Adenosylhomocysteinase	7248.29	4697.02	5972.98	4694.23	3532.78	6399.35	7102.88	7710.37	9303.72	4054.08	1955.13	4275.5	7531.07	4115.37	N/A	3891.58
DGPLNMILDDGGDLTNLIHTK	Q66HA6	Adenosylhomocysteinase	4773.94	1592.18	1664.98	1244.32	3127.2	N/A	2671.16	5473.79	1076.85	1009.27	1412.39	4018.65	1848.4	5216.56	N/A	2168.68
ALDIAENEMPGLMR	Q66HA8	Adenosylhomocysteinase	2500.93	9016.59	8783.39	5499.55	13967.1	8507.51	5595.91	13186.1	3866.1	7302.25	12537.7	6638.57	8689.21	26772.5	11020.3	10498.9
YSTDVSVDEVK	Q66HC5	Glutamate dehydrogenase 1, mitochondrial	46355.6	53722.3	38943.1	35070.7	42023.9	44159.2	38216.2	44937.2	43827.8	37803.8	38496.3	41871.7	37952.5	44569.8	51255.5	47500.1
TAAYVNAIEK	Q66HD0	Glutamate dehydrogenase 1, mitochondrial	28424.7	28133.1	27109.2	20087.4	27565.9	29828.2	26228.5	26517.8	20157.9	25833.3	26669.6	25249.7	24720	27350.5	28432.8	27942.6
VYEGSILEADCDILIPAASEK	Q66HF1	Glutamate dehydrogenase 1, mitochondrial	18098.1	21355.8	23607.6	8536.02	28062.1	26965.4	15992.6	19617.9	11325.6	16595.3	23748.8	23959.9	13508.6	13807	42771	20362.8
YNLGLDLR	Q66HG4	Glutamate dehydrogenase 1, mitochondrial	26380.4	18817.3	19202.6	14975.5	20219.7	20559.5	20685.8	20634.5	20324.7	18381.1	17795.5	17853.4	18283.4	29345.5	30762.5	20508.9
CAVVDVPFGGAK	Q66HG5	Glutamate dehydrogenase 1, mitochondrial	26076.4	27088.2	17484	11696.6	22641.5	25129.9	18105.3	17685.1	23132.4	19332.6	21253.1	19852.8	16026.2	16875.4	23210.3	23497.4
IIAEGANGPTTPEADK	Q66HG8	Glutamate dehydrogenase 1, mitochondrial	10921.9	7219.73	6210.43	5148.69	7640.23	8958.74	8763.85	8450.77	10026.6	6971.98	7238.71	9013.02	7303.77	10989.3	10209.9	8649.62
HGGTIPVVPTAEFQDR	Q66HR0	Glutamate dehydrogenase 1, mitochondrial	18409	10201.5	8222.25	7891.24	15079	12329.4	10751.3	9529.84	15811.3	8275.59	17790.3	20701.1	9422.14	10324.8	15588.8	21557.5
MVEGFFDR	Q66X93	Glutamate dehydrogenase 1, mitochondrial	16645.8	22729.6	19678.5	8520.23	21278.2	23891.8	16864.5	21479.7	11220.4	10354.2	17858.8	17386.8	14461.4	24521.1	16798.3	16112.4
LQHGSILGFPK	Q68A21	Glutamate dehydrogenase 1, mitochondrial	10070.1	9063.29	11981.9	6225.89	7656.48	10199.1	14296.6	8804.54	13625.6	5303.15	10382.1	N/A	13836.4	12860.9	8495.88	11869.7
DDGSWEVIEGYR	Q68FP1	Glutamate dehydrogenase 1, mitochondrial	3181.93	1976.39	2915.96	1942.21	2351.43	3065.97	2711.51	3609.48	4279.22	2092.45	N/A	1690.62	4617.43	1404.46	2478.94	3349.62
ALASLMTYK	Q68FQ0	Glutamate dehydrogenase 1, mitochondrial	13810.6	13794.6	19886.5	18327.9	20657.1	20587.8	10366.8	16318.7	12019.9	14863.5	28355.3	14258.6	15964.7	26819.1	17125	15656.3
GFIGPGIDVPAPDMSTGER	Q68FR6	Glutamate dehydrogenase 1, mitochondrial	4666.28	3401.71	2458.22	1525.05	6569.69	6510.08	2920.41	6134.4	6392.78	1559.79	7288.91	5211.62	4446.06	8597.28	12037.6	7335.51
DIVHSGLAYTMER	Q68FR9	Glutamate dehydrogenase 1, mitochondrial	1208.88	1092.39	1981.27	2515.04	2260.33	1775.48	1230.15	1838.1	1084.89	1965.58	3477.82	990.148	998.598	1558.28	1227.98	N/A
VNPIQGFSAK	Q68FS2	Cytochrome c oxidase subunit 4 isoform 1, mitochondrial	11405.8	8403.34	6608.83	6521.94	9193.8	8207.73	6082.76	8652.37	8214.35	5116.76	7625.25	7632.23	6681.15	5866.37	7945.91	8355.31
DYPLPDVAHVK	Q68FS4	Cytochrome c oxidase subunit 4 isoform 1, mitochondrial	16122.7	14515.1	13348.1	10108.3	12617.3	13545.9	11056.2	12714.8	12691.1	10244.5	14609	15379.2	12065	13790.6	13890.9	12197.3
SEDYALPSYVDR	Q68FU3	Cytochrome c oxidase subunit 4 isoform 1, mitochondrial	73759.7	76103.9	62357.7	47987.8	74526	72189.9	55885.3	68398.8	68209.2	53314.6	84310.1	76744.5	55945.6	72239.1	78221.4	75989.1
IQFNESFAEMNK	Q68FU7	Cytochrome c oxidase subunit 4 isoform 1, mitochondrial	6484.26	5768.32	8383.17	7064.88	6852.53	7423.16	3420.29	9343.49	N/A	5982.36	9091.88	7917.29	5573.46	8583.1	5190.35	5087.64
TFDEIASGFR	Q68FX0	Solute carrier family 2, facilitated glucose transporter member 1	432272	242030	217324	136233	294788	282001	311635	307087	282173	212083	227564	273891	271557	337035	377515	278984
VTILELFR	Q68FX1	Solute carrier family 2, facilitated glucose transporter member 1	109085	24538	36092.4	12554.5	47862.5	60470.9	37525.9	46186.2	70010.6	23687.5	41214.9	29927.6	32245.1	104916	44696.2	30998.3
TPEELFHPLGADSQV	Q68FY0	Solute carrier family 2, facilitated glucose transporter member 1	22677.1	12617.5	10162.7	5083.64	12681	16418.3	14360.1	14466.2	12934.7	7295.51	10315.3	15601.1	11224.7	15850.8	31064.6	9283.36
EAFQEALAAAGDK	Q69BT7	Thioredoxin	5355.17	4352.46	1755.78	2381.85	3202.57	2941.25	3448.54	2553.39	3760.87	4226.76	3584.73	N/A	3492.95	2193.57	4479.3	4678.53
LNDFASAVR	Q6AXM8	Cytochrome c oxidase subunit 5A, mitochondrial	2041.26	2732.01	1682.63	2602.02	2158.59	1014.9	2905.9	2160.1	1498.47	2932.1	2921.91	2619.56	2486.47	2882.33	1125.45	1776.14
AFLIEEQK	Q6AXQ0	60S ribosomal protein L34	18572.8	15184.4	15312.4	12323	14464.3	13394.2	12520.2	14493	15420.4	10987.6	17887.4	14537.6	13531.7	13889.7	12932	12737.4
IVYLYTK	Q6AXQ5	60S ribosomal protein L34	10644.7	7857.62	9123.45	7560.83	7520.57	8331.83	5877.76	7291.82	11083.7	5923.51	10279.1	7161.36	8077.76	9099.64	6549.31	8056.88
ITQYLDAGGIPR	Q6AXS3	Calcium/calmodulin-dependent protein kinase type II subunit alpha	3406.89	4170.36	2660.82	2494.38	3732.96	2157.5	2363.68	3031.1	2739.54	3166.39	3464.58	3024.16	2850.17	1756.38	2902.72	2951.87
EGGLLTLAGAK	Q6AXS5	Dihydropteridine reductase	7912.58	7889.25	7800.26	5556.42	7478.52	7694.94	6316.32	8667.2	7517.75	6120.3	8848.85	8779.92	6550.57	8831.09	11770	7692.34
RPNSGSLIQVVTTDGK	Q6AXT5	Dihydropteridine reductase	5939.63	5827.56	6390.12	4812.73	4452.45	4537.95	6841.9	5002.69	6398.23	5259.09	4633.36	5192.88	6381.15	8038.2	6326.07	6514.44
NSGMPSGAAAIAVLPVTLDTPMNR	Q6AXV4	Dihydropteridine reductase	N/A	1026.71	2697.15	865.607	2618.07	N/A	1001.46	2345.25	N/A	842.677	5141.54	1808.96	1793.31	2891.21	N/A	1310.32
EAIDSYIK	Q6AXX6	Clathrin heavy chain 1	158982	124791	133343	111537	160684	140187	142724	112621	132175	122788	148063	156876	130736	153578	177989	151386
EVCFACVDGK	Q6AY09	Clathrin heavy chain 1	153111	136166	135148	111305	148144	136993	134567	124613	162268	124632	126169	151701	132568	142164	163319	138952
HELIEFR	Q6AY20	Clathrin heavy chain 1	146327	112894	107056	91964.2	99889.5	114190	110799	127472	153845	106993	101305	134649	124937	160541	116990	126024
IYIDSNNNPER	Q6AY30	Clathrin heavy chain 1	81610.7	74167.6	82942.8	59760.5	92585.7	81786.6	81569.5	83748.3	75107.6	73752.5	82190.5	88430.3	65749.3	97078.3	109249	83276.4
IVLDNSVFSEHR	Q6AY41	Clathrin heavy chain 1	103223	76707.1	74619.2	82763.2	87711	84483.6	94536	96435	113072	78198.9	77477.3	115442	73550.9	110068	102706	85964.5
LPVVIGGLLDVDCSEDVIK	Q6AY63	Clathrin heavy chain 1	39994	15484.9	16798.1	11003	37554.8	23001.5	25120.7	26092.1	23675.6	11879.5	26460.6	24177.4	11735.6	30988.4	44124.5	21587.8
ALEHFTDLYDIK	Q6AY84	Clathrin heavy chain 1	23307.5	22129.6	20107.1	19042	25443.9	19873.6	24504.1	21695.3	32849	19944	22222.2	25954.7	24221.7	30923.8	23750.8	24807.4
LTDQLPLIIVCDR	Q6AY96	Clathrin heavy chain 1	101895	50360.9	57099.3	19851.6	67160.7	100039	53943.8	79691.9	100874	37759.3	67576.6	87053.7	65175	105340	252269	69045.8
VIQCFAETGQVQK	Q6AYD3	Clathrin heavy chain 1	66955.2	46712.6	52779.3	47645.4	54594.4	53167.4	55338.6	55771.1	50450.7	48822.5	51723.4	74898.7	51477.2	64152.9	73391	58080.2
GQCDLELINVCNENSLFK	Q6AYH5	Clathrin heavy chain 1	22912.7	13799.4	15191.7	6251.4	18917.3	22905.7	13449.3	17756.8	18883.7	10724.8	14182.2	20750	14016.5	21155.9	43397.6	17063.4
VDKLDASESLR	Q6AYK6	Clathrin heavy chain 1	18220.6	13491.1	14141.1	11832.6	18555.8	13967.8	18135.7	17021.2	18049.6	13882.3	14192.4	19356.7	14387.8	18296.6	24060.1	17329.4
DPHLACVAYER	Q6AYK8	Clathrin heavy chain 1	15412.7	13435.4	14752	12741	14980.7	13776.3	15604.4	11076.1	16122.8	14415.3	13225.8	14256.5	13828	14475.9	15988.1	14999.6
HSSLAGCQIINYR	Q6AYL5	Clathrin heavy chain 1	46046.2	39602.6	46093.2	44746.5	44225.5	41212.7	55559.4	37431.6	49376.1	44715.7	44003.1	78787.8	45743.7	48851.8	51321.8	49171.7
IAAYLFK	Q6AYN4	Clathrin heavy chain 1	70880.1	45364.8	52235.1	42157.1	56859.8	105493	61640.9	48765.4	50512.5	41616.1	55646.6	44259.4	47032.9	64491.9	126944	52216.7
EDKLECSEELGDLVK	Q6AYP5	Clathrin heavy chain 1	29514.4	21223.9	37301.8	17934	24838.2	50214.2	24560.7	26985.1	24072.7	15180.1	21100	29959.3	25652.9	38128.7	39278.2	29085.2
HDVVFLITK	Q6AYQ4	Clathrin heavy chain 1	74013.1	32051.9	39126.6	29580.6	31931.4	33721.6	38971.3	34220	73256.9	33927.8	31539.5	34073.2	32480.6	87249	32370.4	62838.9
NLQNLLILTAIK	Q6AYR2	Clathrin heavy chain 1	66466.9	42126.3	45547.9	12875.2	50591.7	56961.4	41987.7	31043.1	131023	21557.5	53705.7	53924.5	29236.7	184792	127079	43056
VSQPIEGHAASFAQFK	Q6AYS7	Clathrin heavy chain 1	36101.7	30541.1	21262	22358.7	43914.6	38628	46031.4	19460.9	40930.9	18495.3	18026.2	48258.5	22859	19071.7	34849.3	34109.6
KFNALFAQGNYSEAAK	Q6AYT3	Clathrin heavy chain 1	25820.1	18834.5	22795.4	12748.8	26590.9	21269.4	33282	10653.1	29921.7	10687.2	11619.2	20109.7	13710.3	28283.4	26274.4	14593.2
SVDPTLALSVYLR	Q6AYT5	Clathrin heavy chain 1	14303.7	8540.11	4064.52	4267.98	8731.74	6620.25	4252.23	9540.51	13667.4	4015.08	6714.28	5492.25	4962.33	12597.3	11505.3	8300.3
TSIDAYDNFDNISLAQR	Q6AYT7	Clathrin heavy chain 1	42188.3	28529.2	27767.9	13368.9	36086.7	31935	28518.1	40698.8	36461.1	19022.3	30055.4	40516.6	28604	30665.6	81533	40818.8
AVDVFFPPEAQNDFPVAMQISEK	Q6DGG0	Clathrin heavy chain 1	17146.5	9552.32	13610.2	5115.79	18243.5	16841.1	13000.6	16594.2	9893.33	7409.05	68758	22405	12469.2	21858.4	59183.6	14209
ESYVETELIFALAK	Q6DGG1	Clathrin heavy chain 1	12922.5	8624.9	3110.86	2700.75	10127.5	3911.33	2916.86	10008.1	13658.7	2361.42	10284.2	7607.1	2362.99	14876.9	15408.5	7971.71
GQFSTDELVAEVEK	Q6I7R3	Clathrin heavy chain 1	107433	101380	110915	33010.7	116822	113649	57500.1	119679	103883	37673	123228	155169	98885.9	163779	228682	120161
LASTLVHLGEYQAAVDGAR	Q6IE70	Clathrin heavy chain 1	80757.2	55640.8	67111.1	33799.3	125259	104262	72627	61099.3	72460.2	29950.4	123134	129622	54584.6	87906.4	137914	147393
RPISADSAIMNPASK	Q6IFW6	Clathrin heavy chain 1	30611.2	14488.3	27242.5	23010	26308	40972.7	21229.5	26188.2	18021.9	19665.7	46352	33982	18993.5	39182.3	25455.5	18308
VVGAMQLYSVDR	Q6IMF3	Clathrin heavy chain 1	12698.9	14668.7	19395.1	8338.63	25858.7	16727	11686.6	18702	10947	6833.78	18201.8	15079.2	15039.8	20830.6	15174	17747
NNLAGAEELFAR	Q6IMY8	Clathrin heavy chain 1	361055	324103	299408	184360	369312	356814	311029	322086	324508	226989	302056	380960	288359	377463	506054	342349
LLYNNVSNFGR	Q6IRE4	Clathrin heavy chain 1	208474	161785	178957	149475	192947	173673	176174	173513	176458	156447	179130	158267	153448	190854	207436	173822
VANVELYYK	Q6IRK9	Clathrin heavy chain 1	143469	117662	148053	132079	152866	135651	161071	133526	153672	133612	147112	135469	128477	152114	176424	142390
NLILVVR	Q6JE36	Clathrin heavy chain 1	160008	114372	130580	100627	127364	121093	152636	112596	192103	110196	172054	106681	103901	182405	79825.1	116073
YIEIYVQK	Q6MG49	Clathrin heavy chain 1	91123.3	79143.6	100859	92596.8	90321	88017.5	110972	98491.4	86514.7	85525.1	103883	87585.2	89731.1	106406	52646.6	88106.1
ISGETIFVTAPHEATAGIIGVNR	Q6MG55	Clathrin heavy chain 1	100627	28750.9	32164.7	19051	38004.3	33854.6	34823	37684.4	93883.1	23249.6	88412.1	38410.1	29630.8	75109.8	59889.9	80929.7
LECSEELGDLVK	Q6MG60	Clathrin heavy chain 1	51045.9	43492.7	46746.7	37976.6	50653.8	51959.8	46654.2	53557.7	47642.3	36820.8	46420.4	60119.3	48247.1	62846.5	75978.6	52046.7
IHEGCEEPATHNALAK	Q6MG61	Clathrin heavy chain 1	745.441	1096.42	1339.03	873.916	558.925	390.025	1564.52	1154.77	1638.06	224.943	1637.53	1359.95	952.96	N/A	2368.45	507.219
SVNESLNNLFITEEDYQALR	Q6NYB7	Clathrin heavy chain 1	41718	44540.5	40839.6	18436.1	44390.2	44264.9	42393.1	57628.9	26079.6	31467.8	36815.4	62344.8	39207.5	39198.4	55584.7	36418.4
AFMTADLPNELIELLEK	Q6P502	Clathrin heavy chain 1	5251.42	1412.61	3504.4	866.176	7412.73	N/A	3587.27	6878.72	9012.77	1018.66	8708.87	8481.43	1835.65	10700.8	14116.2	3037.26
GQFSTDELVAEVEKR	Q6P6R2	Clathrin heavy chain 1	2401.97	8543.43	11670.2	10494.5	17129	13040.4	11637.5	12291.7	14624.5	7350.24	9785.83	14110.8	11091.4	17166.3	15619.4	15335.9
WLLLTGISAQQNR	Q6P6T4	Clathrin heavy chain 1	9902.96	3016.04	12362.5	3630.98	7879.29	11069.7	9255.23	3084.01	19404.1	8549.12	1400.85	2563.72	11913.4	16401.1	N/A	10515.8
FNALFAQGNYSEAAK	Q6P6V0	Clathrin heavy chain 1	31949.3	24091.5	25937.9	16684.3	25958	22676.5	28211.9	28320.1	34553.8	23619.6	28493	26909.3	27129.7	31561.8	33616.2	26346.9
YESLELCRPVLQQGR	Q6P747	Clathrin heavy chain 1	10001.1	11433.2	11563.7	16547.9	14480.7	11076.2	11592.5	13745.5	15684.4	11528.4	11288.6	11282.8	13130.8	10292.5	8515.95	10718.7
AMLSANIR	Q6P799	Clathrin heavy chain 1	8595.48	5137.52	7872.25	5982.69	9010.28	8638.9	11090.5	7778.86	7982.16	6536.92	3249.97	10367.9	8057.32	4863.32	10799.6	8475.28
LAELEEFINGPNNAHIQQVGDR	Q6P7B0	Clathrin heavy chain 1	24878.7	21678.4	20897.5	12821.7	24522	16182.2	21418.3	25884.6	23466.8	14304.3	19679.4	26329.5	19052.1	26745.4	24256.1	25573.6
LLLPWLEAR	Q6P7P5	Clathrin heavy chain 1	18179	7657.82	19344.8	5991.04	11880.2	25538	7124.61	12011.5	25753.2	7347.72	N/A	9511.92	11645	24648.6	20108.8	12495.6
VGYTPDWIFLLR	Q6P7Q4	Clathrin heavy chain 1	13504.8	4164.49	16012.2	3007.74	8302.86	45045.7	3561.46	11515.2	16046.7	6081.36	N/A	6686.94	14314.8	18006.1	N/A	13496.3
CNEPAVWSQLAK	Q6P9T8	Clathrin heavy chain 1	11531.7	10917.4	14702.3	8924.03	N/A	11500	15034.2	14709.3	12583.5	12339.6	4655.42	10107.8	13504.6	N/A	10023.9	10565.2
LHIIEVGTPPTGNQPFPK	Q6PCU2	Clathrin heavy chain 1	39919.7	34938.5	32961.3	29420.9	59394.2	51844.8	50069.3	36000.3	75953.1	27545.6	79492.4	71751	37703.3	32785.8	65880.5	41034.6
RPLIDQVVQTALSETQDPEEVSVTVK	Q6PDU1	Clathrin heavy chain 1	13552	10354.9	5400.38	3799.64	10525	2448.78	5808.14	13832.6	19075.4	4157.9	10134.4	15527.5	6226.8	16514.4	15528.9	8402.35
MEGNAEESTLFCFAVR	Q6PDU7	Clathrin heavy chain 1	2451.06	2446.23	1364.19	1717.06	1808.22	N/A	2128.04	2131.26	N/A	1747.18	1368.17	1709.51	1798.39	1875.02	N/A	1160.52
QLPLVKPYLR	Q6PEC0	Clathrin heavy chain 1	3485.41	N/A	4353.38	4383.48	8673.31	3853.74	5412.08	N/A	5099.28	2983.27	N/A	N/A	4431.01	3695.51	4361.98	6438.05
ADDPSSYMEVVQAANTSGNWEELVK	Q6PEC4	Clathrin heavy chain 1	889.345	841.042	1133.15	599.832	1137.93	1333.09	1137.59	1512.35	N/A	852.288	N/A	927.203	1677.49	1357.75	3827.72	1083.57
TLQIFNIEMK	Q6Q0N0	Clathrin heavy chain 1	28366.3	25589	37083.8	11983.4	48562.1	41341	29592.2	38591.8	33255.2	26190.3	58619.5	41494.1	26693.2	61549.9	51155.5	33984.9
FQSVPAQPGQTSPLLQYFGILLDQGQLNK	Q6Q0N1	Clathrin heavy chain 1	1482.8	407.854	481.142	280.436	1191.87	N/A	771.687	1059.71	3949.47	409.546	N/A	919.618	1566.81	1420.02	N/A	1400.28
VGEQAQVVIIDMNDPSNPIR	Q6Q0N3	Clathrin heavy chain 1	23415.1	12170.4	33869.6	12756.8	35705.7	30766.2	15209.3	39036.8	19789.2	11909.6	48234	45337.6	12823.3	23490.8	24532.2	23094.6
AILQLVR	Q6QLM7	Steroid hormone receptor ERR2	85432.9	43381.8	1297.68	51520.2	74637.6	83588.3	41672	1752.73	68367.8	43846	2621.21	3025.91	1785.43	77482.5	58455.5	2378.12
TICLAFR	Q6R556	Plasma membrane calcium-transporting ATPase 1	48136.7	26675.2	30659.3	26086.4	31584.9	34682.1	38362.4	27664.9	34839.9	27741.5	36235.6	27386.7	30511.1	39471.2	38577.6	37218.6
GGQVIQIPVADITVGDIAQVK	Q6RJR6	Plasma membrane calcium-transporting ATPase 1	5845.31	3554.26	3578.49	2823.15	7086.12	3869.25	5526.12	5460	5037.46	3427.71	5630.32	4099.76	3559.82	4366.36	14861.3	5548.73
NEIPEEALYK	Q6RUV5	Plasma membrane calcium-transporting ATPase 1	48106.8	42059.4	37251.7	37084.2	45398.8	44439.9	44428.7	35503.4	45864.4	37838.7	43183.5	46065	40396.5	43577.7	56526	47383.7
FFDIDSGR	Q6TEK3	Plasma membrane calcium-transporting ATPase 1	22075.8	18525.9	17710.7	13226	19578.9	20860.9	18910.1	16748	17435.8	13934.6	21074.9	22281.5	16458.5	19418.2	21213.1	19015.6
TSPNEGLSGNPADLER	Q6TRW4	Plasma membrane calcium-transporting ATPase 1	49447.9	26072.4	28026	21519.4	28192.2	28607	21122.5	29923.8	38890.4	21703	26720.3	62660.5	48348.6	62412.8	65459	54648.5
GIIDSTVSEQR	Q6UPE1	Plasma membrane calcium-transporting ATPase 1	76702.7	61986.7	71099.7	59449.2	73907.1	80952	71431	73311.2	67825.7	55710.6	62429.9	91603.5	70129.9	81592.9	93968.6	79257.3
IQESYGDVYGICTK	Q6UPR8	Plasma membrane calcium-transporting ATPase 1	9667.08	7538.72	6807.87	3899.5	6622.75	7128.82	8228.5	7891.57	8604.88	6333.61	7868.21	8155.27	7384.51	9622.88	11181.6	9621.18
MTVVQAYINEK	Q6URK4	Plasma membrane calcium-transporting ATPase 1	3644.95	6114.16	9777.08	4395.31	9939.19	6570.6	8037.45	10275.1	6558.07	4244.09	9675.62	7375.77	6546.27	11328.6	8441.7	7109.3
EANHDGDFGITLAELR	Q704E8	Plasma membrane calcium-transporting ATPase 1	6635.77	7488.07	7692.5	6067.65	8831.35	4900.87	7335.32	11535.7	6980.12	5867.91	8662.88	10670.3	8355.85	10094.2	8873.76	9383.31
TVIEPMASEGLR	Q711G3	Plasma membrane calcium-transporting ATPase 1	13598.3	10007.4	18186.9	16348.2	23367.3	21049.3	13603.8	18739.5	12612.8	12849.6	22050.1	17860.2	15578.8	24469.2	20641.4	16275.7
IDESSLTGESDQVR	Q71TY3	Plasma membrane calcium-transporting ATPase 2	10356.5	8895.39	7739.67	6593.36	9785.17	8970.86	7190.89	7229.65	8815.26	6735.24	8087.09	10402.8	7217.74	9372.79	11899.7	8350.32
NVFDGIFR	Q75Q39	Plasma membrane calcium-transporting ATPase 2	2836.09	1995.63	3033.44	1348.12	2171.76	3277.34	2303.54	2149.18	2123.77	1464.62	2133.61	1811.6	1773.07	2271.48	2315.95	1491.92
EIPDPSSINAK	Q765A7	Plasma membrane calcium-transporting ATPase 2	16309.9	15690.9	14183.7	12501	17775.5	14371.5	14052	13301.8	12397.5	11673.4	15194.1	16936.5	15290	14748.6	17352.6	14527.8
AGQVVQIPVAEIVVGDIAQIK	Q76M68	Plasma membrane calcium-transporting ATPase 2	1924.68	656.68	1861.75	438.164	3559.54	3456.2	1267.41	1321.71	861.461	736.79	2647.57	1131.3	870.104	3587.42	3805.7	1615.11
YGDLLPADGLFIQGNDLK	Q78P75	Plasma membrane calcium-transporting ATPase 2	4916.33	1497.23	2056.88	603.414	1792.74	3420.97	1673.77	2599.93	3549.86	927.807	2589	2666.26	1945.37	5216.36	10861	2995.21
TSPVEGLPGTAPDLEK	Q792H5	Plasma membrane calcium-transporting ATPase 2	16124.7	11645.1	11373.3	7817.04	13710.9	13225.4	11272.8	10754.5	12386.9	8332.42	12907.4	14476.9	11827.5	13027.1	15532.9	13070.6
EASDIILTDDNFSSIVK	Q792I0	Plasma membrane calcium-transporting ATPase 2	6829.86	3238.22	4142.53	1640.87	4097.88	6081.51	3552.48	4357.06	4891.29	2489.34	5136.32	5546.03	3921.81	6288.26	17239.5	5224.09
EFDELSPSAQR	Q793F9	Sarcoplasmic/endoplasmic reticulum calcium ATPase 2	33042.9	29247.6	34074.5	27920.8	31254.5	36432.8	31314.2	37607.9	24449.1	29996.2	30875.9	40053.4	30480.8	37510	40626.3	33604.6
IGIFGQDEDVTSK	Q794E4	Sarcoplasmic/endoplasmic reticulum calcium ATPase 2	14018	11907.3	10244.9	7756.84	12859.7	11236.5	11285.5	11846.5	10718	10047.6	11738	11875.7	9919.79	12799.7	14943.5	10161.9
VEGDTCSLNEFTITGSTYAPIGEVQK	Q794F9	Sarcoplasmic/endoplasmic reticulum calcium ATPase 2	3333.5	2432.71	2918.32	1482.23	1781.17	2349.34	3255.61	3566.83	2913.34	2603.96	2322.89	3374.87	3224.95	2559.61	7647.44	3487.78
DIVPGDIVEIAVGDK	Q7M0E3	Sarcoplasmic/endoplasmic reticulum calcium ATPase 2	14698.1	3372.63	7784.89	1054.61	7127.39	14922.2	7789.82	9990.92	10265	3681.44	17934	12046.1	7588.16	13644.9	57031.8	8470.73
MNVFDTELK	Q7M767	Sarcoplasmic/endoplasmic reticulum calcium ATPase 2	73500.4	53506.8	61166.8	40668.8	68296.5	69879.6	55572.4	57597.3	55249.8	44361.4	62626.5	59166.2	48436.4	72407.8	63304.8	59335.2
SEIGIAMGSGTAVAK	Q7TNY6	Sarcoplasmic/endoplasmic reticulum calcium ATPase 2	3514.65	4666.38	3838.87	4603.8	4798.61	5988.86	3389.11	4924.01	N/A	2289.22	6461.68	4145.38	4400.41	7232.83	4089.25	4060.53
CLALATHDNPLR	Q7TP47	Sarcoplasmic/endoplasmic reticulum calcium ATPase 2	1899.32	1886.98	1357.65	1948.47	1332.04	N/A	2162.55	1547.91	1734.14	2163.69	1749.2	1809.81	2493.09	N/A	1379.3	1215.03
DIVPGDIVEIAVGDKVPADIR	Q7TP48	Sarcoplasmic/endoplasmic reticulum calcium ATPase 2	472.15	556.334	713.956	423.595	1462.92	N/A	567.362	604.843	146.565	314.468	N/A	882.274	671.928	958.213	N/A	835.502
EEMHLEDSANFIK	Q7TP54	Sarcoplasmic/endoplasmic reticulum calcium ATPase 2	2608.17	2810.09	3996.89	3333.49	3070.75	N/A	2704.43	3013.56	3149.85	3005.82	3215.9	3154.89	3230.9	N/A	3578.58	3556.48
ATVSGLWGK	Q7TP98	Hemoglobin subunit beta-2	N/A	2181.77	2608.13	2962.57	1684.23	1356.27	7939.84	4989.91	2630.24	69499	472.568	N/A	3492.54	N/A	2418.22	1501.78
FGDLSSASAIMGNPQVK	Q7TPB1	Hemoglobin subunit beta-2	6161.13	2834.33	2724.46	2136.24	6892.66	4588.98	4127.84	7563.09	2400.21	72349.5	7799.56	3443.89	2374.76	12318.8	9584.03	5596.52
TGIISLCK	Q7TPJ0	Dystrophin	3286.55	N/A	3070.7	2155.69	2186.56	3079.46	2896.75	2733.19	2676.71	2533.81	2764.59	2704.34	2658.4	N/A	N/A	2332.44
SEPIPETNEGPVK	Q7TSA0	Protein disulfide-isomerase A3	131451	134468	113470	89084.6	107678	134860	94041.5	128095	105483	97900.7	108102	123442	123485	133636	142535	138014
YGVSGYPTLK	Q7TT49	Protein disulfide-isomerase A3	60641.3	47861.9	42801.2	38973.4	47748.4	46724.3	49856.5	46669.7	46263.9	44683	40122.4	44820.8	45381.7	61135.4	60854.9	51122.4
LAPEYEAAATR	Q80U96	Protein disulfide-isomerase A3	51723.4	37135.1	39752.7	27838.6	38623	33537.1	40855	34991.1	44725.5	42150.6	33237.1	35791.2	34719.1	42962	48540.2	40472.4
LNFAVASR	Q80W83	Protein disulfide-isomerase A3	57058.1	35378.5	45379.9	32507.6	38470	44741.1	45249.4	36516.3	44822.8	36201.9	39919.1	42062.6	37674.5	48010.8	51066.8	45344.3
QAGPASVPLR	Q80WE1	Protein disulfide-isomerase A3	47934.6	30265.8	26102.2	28405.1	38937.1	40614.4	39488.4	33921.8	57700.9	32688.1	34879.7	42576.3	35168.4	41405.7	42519	38529.6
TADGIVSHLK	Q80Z29	Protein disulfide-isomerase A3	35737.5	22806.3	23019.7	15947.8	23383.2	31888.1	22884.3	31179.3	28273.5	21943.4	20366.4	34199.2	17941.6	30756.8	37975.2	21919
DASVVGFFR	Q80Z30	Protein disulfide-isomerase A3	64690	34808.5	32501.5	18244.4	47068.6	47564.5	34400	36355	52309.1	29708.5	42474.4	38187.2	25261.1	36600.1	45099.1	38447.9
DPNIVIAK	Q80ZA5	Protein disulfide-isomerase A3	31227.5	23928.2	21336.6	17106.2	24798.4	29446.1	26286.1	20073	24197.3	21172.4	25946.2	28278.7	22297.2	27197.6	25598.5	24671
FAHTNVESLVK	Q80ZG0	Protein disulfide-isomerase A3	7786.86	6645.89	7640.81	5867.6	6782	7775.76	7994.03	7316.37	5948.4	6698.92	5432.5	7720.78	7410.07	8629.82	6747.48	7586.1
EATNPPIIQEEKPK	Q812D1	Protein disulfide-isomerase A3	6029.51	5160.24	6025.08	4637.21	5894.68	5749.71	5431.39	5777.08	4125.29	5489.91	4727.41	5180.71	5692.19	6461	5989.63	5983.47
FLQEYFDGNLK	Q812E9	Protein disulfide-isomerase A3	9520.9	8751.08	8221.46	4661.21	6633.62	8497.45	7835.91	7605.07	10367.1	6790.89	7650.56	8027.85	6441.94	6780.12	8301.62	8278.17
DLFSDGHSEFLK	Q8CF97	Protein disulfide-isomerase A3	3657.35	3423.66	2718.11	2778.96	3138.89	3035.35	4040.2	3172.76	N/A	3329.22	2628.27	4897.46	3550.8	4060.06	3253.81	3027.65
FVMQEEFSR	Q8CFD0	Protein disulfide-isomerase A3	7744.58	8513.09	9650.95	4802.78	9682.32	8689.45	4533.19	9620.15	6657.22	6455.15	11055.8	6189.45	5752.06	12754.2	9107.66	6010.26
TFSHELSDFGLESTTGEIPVVAIR	Q8CFG6	Protein disulfide-isomerase A3	25517.1	17130.9	6764.6	3829.16	16501.8	14070.8	16514.2	19535.8	20872.4	7607.08	7024.97	18443.2	14706.6	20651.8	14379.7	19614.3
ELNDFISYLQR	Q8CFN2	Protein disulfide-isomerase A3	37831.7	18612.2	10220.8	8911.84	25720.1	28499.5	17813.6	25256.7	28028.9	15108	19970.5	21572.1	21144.5	35429.8	59053.9	25755
GFPTIYFSPANK	Q8CG45	Protein disulfide-isomerase A3	73045.4	42184.5	51291.1	25858.1	74841.1	64715.6	49138.9	48382.4	68783.3	40591.4	50824.8	41299.1	45770.8	67019.3	99285.7	68577.3
DLLTAYYDVDYEK	Q8CGU6	Protein disulfide-isomerase A3	36745.1	20957.1	21819.1	13333.6	31984.7	23906.4	23297.4	29804.6	22936.1	21464.6	17168.6	24571.9	18497.9	22060.2	30279.1	27301.7
MDATANDVPSPYEVK	Q8K1P7	Protein disulfide-isomerase A3	16911.5	15842.2	16873.4	6261.27	18913.3	18989.3	12912.4	19425.7	9379.82	7126.88	10963.7	12148.9	8946.99	29117.3	20487.8	16043.4
ISSQTFPAPPSPK	Q8K1Q0	ATP synthase protein 8	18359	20786.5	19838.8	14046.6	14680	18925	17305.1	20117.3	18703.4	15088.6	18354.6	22878.9	15229.9	21316.3	18939.1	19411.4
EIVVVTPQK	Q8K3P4	Nuclear pore membrane glycoprotein 210	N/A	3265.1	3342.91	3784.02	3969.91	3707.49	5800.79	2976.16	3280.14	3463.63	4039.74	N/A	4299.17	3129.56	N/A	3533.96
YSPLITINENNPNLINPIK	Q8K4F7	NADH-ubiquinone oxidoreductase chain 5	1232	196.375	540.21	223.049	N/A	N/A	484.523	578.744	1213.56	207.03	573.225	N/A	417.444	1259.54	2587.17	454.492
SISGALASDLGK	Q8K4V4	Aldehyde dehydrogenase, dimeric NADP-preferring	26739.8	4784.69	N/A	3519.36	15849.9	11852.3	44796.3	8267.37	N/A	3502.87	N/A	7604.08	5195.58	16119.5	8027.73	7909.19
IQQLEALQR	Q8K582	Aldehyde dehydrogenase, dimeric NADP-preferring	10915.7	1998.31	N/A	1628.59	6568.78	3711.94	20821.6	3529.42	N/A	1843.77	N/A	1610.18	1498.25	3697.09	2105.44	2105.33
LADLIER	Q8R431	Aldehyde dehydrogenase, mitochondrial	13653.8	7917.78	6612.41	5234.59	8623.21	8706.63	11417.1	8843.94	7245.16	8199.46	5250.37	7645.92	7199.31	10334.9	9145.12	7520.92
TEQGPQVDETQFK	Q8R478	Aldehyde dehydrogenase, mitochondrial	5894.25	2704.7	2065.58	1913.91	3433.79	3296.22	3226.81	3838	4620.4	3530.71	1119.96	2565.89	3483.86	5201.72	4724.35	2642.98
VVGNPFDSR	Q8R5H8	Aldehyde dehydrogenase, mitochondrial	14660.3	7630.36	N/A	5483.41	10492.3	9579.13	12298.5	8274.37	9848.26	9810.79	N/A	9014.1	7423.34	9746.48	11010.1	7051.73
GYFIQPTVFGDVK	Q8VBU2	Aldehyde dehydrogenase, mitochondrial	12270.5	5358.37	4085.91	2294.55	7674.09	10323.6	6849.88	7174.64	11479.9	4824.35	3011.5	N/A	5184.53	10113.5	17519.3	5158.44
LQSLQLQPDK	Q8VD52	Non-specific lipid-transfer protein	3532.57	N/A	3292.16	2489.24	3297.79	2901.83	3211.38	3176.64	3451.54	2722.75	2947.09	3909.96	2417.85	3312.61	3839.74	2988.58
APIIAVTR	Q8VHF5	Pyruvate kinase PKM	5508211	4.30018e+06	4.84057e+06	3.07096e+06	4.57553e+06	5.35712e+06	4.43558e+06	4123979	4.25779e+06	3.32435e+06	4.2429e+06	5.09256e+06	3697113	5853944	5109308	4.73592e+06
GDYPLEAVR	Q8VHK2	Pyruvate kinase PKM	2.68104e+06	2.0494e+06	2.40622e+06	1.87316e+06	2486162	2567005	2.04162e+06	1.85294e+06	2.45537e+06	2.09828e+06	2.73991e+06	2.29015e+06	1.94974e+06	2.57092e+06	2.85054e+06	2873683
LLFEELAR	Q8VHK7	Pyruvate kinase PKM	379182	296082	268206	143745	346340	312993	222348	283692	334542	171184	317386	371000	220892	263214	389210	323539
GVNLPGAAVDLPAVSEK	Q8VHU4	Pyruvate kinase PKM	478228	404805	336307	138401	386372	547337	271803	413840	449590	223473	394144	477746	270459	448959	824018	447887
ITLDNAYMEK	Q8VIF7	Pyruvate kinase PKM	226993	236287	299343	258161	310887	285460	135734	254407	176264	198855	396230	217093	204787	387133	220112	233385
VNLAMNVGK	Q8VIJ5	Pyruvate kinase PKM	66266.1	30444.8	43096.5	32069	37670	42708.1	53842.7	34821.1	78521.1	48695.7	19217.9	49120.8	43019.9	29151.1	47746.9	42008.1
GADYLVTEVENGGSLGSK	Q91V33	Pyruvate kinase PKM	184252	124605	108526	66388.1	131581	131189	105535	117912	144843	95728	112539	122931	126334	155837	288341	171010
GIFPVLCK	Q91XU8	Pyruvate kinase PKM	840151	561438	542516	373533	649494	735142	563509	513113	845540	446750	608438	1.03694e+06	553880	679054	783032	716729
LDIDSAPITAR	Q91Y81	Pyruvate kinase PKM	3.56934e+06	1.5273e+06	1.72434e+06	1.03722e+06	1.59401e+06	1.83411e+06	1.26781e+06	1.58931e+06	3.09574e+06	1003792	1.68876e+06	1.82745e+06	1.23937e+06	2850923	3.57677e+06	1642848
NTGIICTIGPASR	Q91Z79	Pyruvate kinase PKM	3.84028e+06	1.74204e+06	1.45427e+06	1.03036e+06	1.49555e+06	1.73215e+06	1.25828e+06	1.49529e+06	2794630	1.15537e+06	1369630	1.63054e+06	1.19427e+06	3.17118e+06	3.11353e+06	1.66522e+06
IYVDDGLISLQVK	Q920J4	Pyruvate kinase PKM	685582	219215	148579	117471	261893	204095	151461	224376	280572	151889	263635	230183	99448.6	382940	376986	207866
FGVEQDVDMVFASFIR	Q920L2	Pyruvate kinase PKM	17615.7	6037.3	7514.21	3649.69	21216.5	10702.3	8614.78	12837.6	14848.2	2965.93	23740.2	11791	5720.03	16080.5	12316.1	8337.79
DAVLDAWAEDVDLR	Q920Q0	Pyruvate kinase PKM	97095.8	17697.2	48006.4	11765.1	19298.9	90276.2	12294.9	48263.1	76740.3	16109.6	7432.5	39801.4	49398.9	91249.1	262900	114063
KGVNLPGAAVDLPAVSEK	Q923S8	Pyruvate kinase PKM	355408	313910	338511	252065	278113	302747	324909	357500	392837	223048	323932	378674	309231	403911	485512	394441
AEGSDVANAVLDGADCIMLSGETAK	Q924K2	Pyruvate kinase PKM	80239	43576.2	51217.6	24417.2	68139.6	56475.2	46862.4	64888.7	49788.6	32744.8	48524.9	82618.4	54941.4	44337.9	84601.4	54291
AATESFASDPILYRPVAVALDTK	Q924S1	Pyruvate kinase PKM	1222204	947066	1.14216e+06	542695	1.2636e+06	1.04326e+06	779183	1.138e+06	1.20514e+06	660405	1.2029e+06	1.03022e+06	900797	938187	1.61723e+06	1.41787e+06
CLAAALIVLTESGR	Q924S5	Pyruvate kinase PKM	153633	50435	93397.8	11806	192136	278890	90935.5	N/A	N/A	35292.3	4419.57	83975.8	56353.1	127591	70476.3	61479.5
CDENILWLDYK	Q99JD4	Pyruvate kinase PKM	5183.12	4974.34	4858.49	2132.61	1406.15	6076.01	3258.47	4504.67	4275.42	3056.74	N/A	4147.96	4795.94	3371.03	6213.42	3172.15
FDEILEASDGIMVAR	Q99JE6	Pyruvate kinase PKM	43212	25198	20550.5	5491.7	24767.4	15786.7	21927.2	39348.1	34199.8	17259.1	25910.4	33106.1	25670.4	33281.9	13423.1	21720.6
RFDEILEASDGIMVAR	Q99M63	Pyruvate kinase PKM	133302	29159.2	90699.8	36713.4	110302	60644.9	52440.2	148337	120358	24136.7	66580.4	128512	34283.5	52714.5	13020.5	83643.8
AGKPVICATQMLESMIK	Q99MH9	Pyruvate kinase PKM	73743	54725.4	64231	44899.6	139617	45403.7	47639.4	51026.7	37112.2	37020.6	257009	138014	50989.9	132613	136557	51793.1
ASSQSTDPLEAMAMGSVEASYK	Q99MI7	Pyruvate kinase PKM	N/A	3257.6	6922.9	2798.5	6489.5	3331.64	3646.07	5246.82	1182.54	2196.73	9543.73	1000.78	2723.51	4882.55	2599.87	1577.05
GTVLLSGPR	Q99ML5	60S ribosomal protein L18	25639.7	17472.2	17093.5	11701	14378.8	12251.6	11452.1	20004.7	12816	10412.8	19545.1	21395.9	19466.4	25362.5	12511.3	16702.5
TNSTFNQVVLK	Q99MS0	60S ribosomal protein L18	2892.1	2309.24	1333.61	1754.76	1428.09	793.238	1190.71	2811.29	N/A	652.897	3993.45	2502.97	3099.84	2660.1	N/A	1285.43
TAVVVGTITDDVR	Q99MZ4	60S ribosomal protein L18	16612.6	10341.3	11306.8	7602.42	9233.7	7008.65	7654.62	13948.9	11059.9	5277.99	13315.5	14195	10227	14714.1	5715.54	8629.35
ILTFDQLALESPK	Q99MZ8	60S ribosomal protein L18	3020.83	2959.99	2797.33	1959.63	2891.85	N/A	2269.37	3777.01	2429.48	1332.25	4575.48	4910.26	3101.24	3520.08	2467.91	2605.89
LYEIGGGTSEVR	Q99N27	Isovaleryl-CoA dehydrogenase, mitochondrial	15394.8	16270.3	15158.3	13021.9	17074.7	14976.2	14753.3	20807.8	13681	19697.9	18405	14923.1	12486.9	18534.5	18538	14423.2
VPAANILSQESK	Q99NA5	Isovaleryl-CoA dehydrogenase, mitochondrial	5059.26	4051.92	3725.39	3252.11	4251.98	4123.65	3950.84	5322.65	5369.91	3397.24	3969.64	4415.88	3555.5	4701.98	5288.88	4252.34
FVQENLAPK	Q99PD4	Isovaleryl-CoA dehydrogenase, mitochondrial	7566.68	6425	5050.26	4756.14	6128.79	5212.18	6637.23	6926.15	6058.87	5442.54	5529.99	6869.01	6072.77	4381.93	6515.84	6241.32
GSNTCELVFEDCK	Q99PF5	Isovaleryl-CoA dehydrogenase, mitochondrial	2180.51	3240.45	2218.96	2625.75	1799.04	2522.47	2595.19	2565.81	N/A	2569.85	2360.26	2500.73	2956.71	3004.99	3358.52	2549.08
EDPNLVPSVSNK	Q9EPB1	Cytochrome c oxidase subunit 5B, mitochondrial	14115.5	14747.5	12131.8	10036.2	12812.3	15611.9	10260	14031.6	10283.5	10345.3	13215.7	14588.7	11890.3	12677.9	14055.1	11148.8
TVLPADGPR	Q9EPC6	Serotransferrin	91298	86087.2	54889.8	51392.1	85403.3	94894	65238.9	89661.2	85588.9	52885.3	90612.4	131243	75092.7	70581.9	109951	97409.7
DSAFGLLR	Q9EPF2	Serotransferrin	92605.5	71985.4	46779.4	40673.3	73367.2	64718.5	49728.2	63601.2	77624.8	38850	85298.5	111869	60113.9	73998.8	115571	90470
GYYAVAVVK	Q9EPH8	Serotransferrin	67158.4	58814.3	52742	59576.3	66747.7	56899	59963.6	64714.2	75570.9	54330.5	83643.9	74748	77161.5	64672.1	49994.8	77188.4
DFQLFGSPLGK	Q9EQE1	Serotransferrin	60179.2	33506.6	27955.6	11642.8	47897.8	71632.2	28676.8	51722	66693.2	20924	57727.9	62293	46892.3	55465.6	161202	64716
GTDFQLNQLQGK	Q9EQH5	Serotransferrin	38301.3	46797.8	28037.8	28073.1	35880.8	34796.2	31793.4	42161.7	35322.3	33351.2	39848.5	52670.9	40374	39710.1	55079.4	51352.2
HTTIFEVLPQK	Q9EQS0	Serotransferrin	21932.3	25062	14798.4	18986.4	19533.1	17899.9	21235.9	26877.4	28401.4	17870.6	25378.3	33828.4	25652.7	29211.2	27645.3	30674
EGVCPEGSIDSAPVK	Q9EQX9	Serotransferrin	69278.2	80182.2	46008.4	58988.6	66231.3	60036.4	48107.3	75700.3	59560.2	49556.2	88014.7	110466	72407.1	68186.2	108127	86839.6
LLEACTFHK	Q9ER24	Serotransferrin	9141.28	8801.42	7080.21	6764.62	8689.93	8850.69	7030.52	8389.76	9707.15	6702.49	9746.06	13462.8	9554.98	9356.31	11821.1	11708.8
QEDFQLLCPDGTK	Q9ER34	Serotransferrin	13748.2	13753.2	6766.09	6766.05	9506.64	9033	9761.71	11554.5	11605.3	8531.3	12203.8	16069.2	13703.4	12498.6	23213.7	14803.7
LPEGTTYEEYLGAEYLQAVGNIR	Q9ERH3	Serotransferrin	5826.96	9359.07	5079.02	4475.62	5000.74	5427.31	7602.47	12287.3	9890.45	5558.82	9812.65	16399.8	9468.58	6545.61	17346.2	11242.8
KPVDQYEDCYLAR	Q9ES21	Serotransferrin	25411	24086.5	16130.8	21871.3	48341.5	20942.4	25982.5	20703.9	29430.5	20428.4	24169.6	34439.4	30300	23553.7	34263.7	37842.2
ASDSSINWNNLK	Q9ES40	Serotransferrin	24821.3	24315.3	27812.7	22342.8	25025.5	29094.9	28784.8	34398.1	23489.2	19694.4	18090	30156.4	31159.7	N/A	36538	32722.5
SKDFQLFGSPLGK	Q9ESR9	Serotransferrin	15671	9595.16	9137.3	4395.6	14348.5	11674.5	6239.98	5851.24	17456.6	4863.27	12558.2	16023.9	7833.68	7862.18	15671.9	11926.3
LYLGHSYVTAIR	Q9EST6	Serotransferrin	10898	9244.01	10058.8	7369.21	12255.8	8982.39	13767.2	9887.1	17961.8	5898.84	13089	10509.9	8524.83	12908.5	9352.97	8900.97
KGTDFQLNQLQGK	Q9ESW0	Serotransferrin	4986.03	6841.4	4887.93	4160.71	7668.95	6699.19	7470.58	9048.39	7376.85	3489.12	7773.21	10668.1	4749.46	7470.88	10388.3	5494.8
FDEFFSQGCAPGYK	Q9ET62	Serotransferrin	48550.5	36485.2	17342	10266.3	39324	27678.8	27163.9	35806	46207.3	11473.2	41215.8	44245.6	41804.4	29505.5	55066.1	58393.8
DQYELLCLDNTR	Q9JHU0	Serotransferrin	13173.5	12552	6976.24	3094.78	11552.9	9888.16	8570.71	12639.3	14753.4	6739.9	10970.5	13998.5	10822.5	10854.7	28896.8	17215.7
GDKDCTGNFCLFR	Q9JHW0	Serotransferrin	11904.2	8971.72	9073.17	11875.6	14456.9	11552.4	15718.1	15570.3	12785.4	11801.6	12606.6	18649	18757.2	12830.6	15328.8	20958.7
ADRDQYELLCLDNTR	Q9JHY2	Serotransferrin	19276	25194.8	15795	17126.3	22257.6	19893.8	18886.7	24418.1	25487.1	19999.2	22570	26566.9	25499.4	24412.2	34052.7	37867.2
DLKQEDFQLLCPDGTK	Q9JHZ4	Serotransferrin	16320.3	15753.7	9758.12	10725.8	25435.4	17623.7	11982	19402.5	17900.2	8577.38	15490.1	26441.4	19518.3	18180.5	31884.3	30548.7
IVDVIGEK	Q9JHZ9	cAMP-dependent protein kinase type II-alpha regulatory subunit	69934.8	56206.9	62720.2	46609.4	62415	71212.3	55393.5	52212	59372.8	42959.7	64748.4	71606.6	47869	61880.1	61276.5	62495.8
GTYDILVTK	Q9JID2	cAMP-dependent protein kinase type II-alpha regulatory subunit	40428.6	28268.9	30538.8	24818.8	34450.5	35464.1	32022.8	32149.6	29798.1	25481.7	36468.5	32363.1	28921	39559	42708.5	35461.4
MFGSNLDLLDPGQ	Q9JIL3	cAMP-dependent protein kinase type II-alpha regulatory subunit	9690.82	6714.06	5067.61	2590.3	12179.1	17592.3	6021.7	10304.5	6032.67	3968.43	18808.5	9890.1	6829.38	15602.4	34845.2	8295.01
TDEHVIDQGDDGDNFYVIER	Q9JIL8	cAMP-dependent protein kinase type II-alpha regulatory subunit	10372.8	N/A	1785.07	3958.86	4354.78	4420.9	8265.34	10246.3	8195.17	812.422	4228.78	6870.43	10416.6	10098.4	13275.9	12434
NISHYEEQLVK	Q9JIX3	cAMP-dependent protein kinase type II-alpha regulatory subunit	1465.21	1744.7	1612.13	1429.06	N/A	N/A	1876.64	1609.1	1670.73	1703.35	1260.76	1524.01	1627.86	1204.66	1563.67	1621.63
MFESFIESVPLFK	Q9JJ19	cAMP-dependent protein kinase type II-alpha regulatory subunit	6389.87	3071.99	5913.58	970.664	N/A	7280.57	4002.19	5416.92	N/A	1391.38	7351.6	6214.17	2091.47	4610.39	11141	4020.32
GTFDIYVK	Q9JJ22	cAMP-dependent protein kinase type II-beta regulatory subunit	2565.53	3309.47	3258.49	2663.46	4058.22	3645.7	3029.47	3202.7	2445.31	2669.84	4641.53	2832.46	2469.75	2588.79	2627.05	3297.86
EFGATECINPQDFSK	Q9JJ31	Alcohol dehydrogenase class-3	16474.3	9386.6	8471.98	5659.09	9876.31	8077.13	7354.37	10086	12944.4	6722.19	8661.17	10040.6	9345.09	8774.82	11814.1	11740.9
VCLLGCGISTGYGAAVNTAK	Q9JJ50	Alcohol dehydrogenase class-3	1037.24	1102.6	1776.97	1051.1	1780.19	1659.34	1316.29	1277.64	1338.83	1316.76	1405.25	426.173	1236.72	881.371	1635.85	1292.46
AGDTVIPLYIPQCGECK	Q9JJ54	Alcohol dehydrogenase class-3	15874.8	5752.58	3615.46	1188.11	7644.55	9195.22	2322.27	6729.08	11655.5	1770.84	6635.58	5367.62	5646.63	7877.38	21222.4	9520.26
VDEFVTGNLSFDQINK	Q9JJK1	Alcohol dehydrogenase class-3	4743.22	2585.6	2568	1445.54	2052.47	2409.63	2890.26	2782.35	2989.49	2312.54	1855.68	3047.61	2523.66	1643.82	2751.74	3593.27
FNPFVTSDR	Q9JJM9	60S ribosomal protein L26	16398.4	15581.1	16812.4	11515.9	17586.3	16453.5	13112.8	14877.4	17360.8	10431.8	18102.8	18376	12139.3	13040.4	14881.2	15324.6
YVIYIER	Q9JJW3	60S ribosomal protein L26	12116.9	9032.7	9531.27	8520.21	8944.61	8675.76	8061.55	8380.86	12219.4	8445.03	9903.03	9252.41	8703.69	9504.81	3418.24	9444.73
VAAAVDLITR	Q9JK11	Fatty acid synthase	15163.2	12844.1	17655.1	12588.9	16557	15500.8	15845.4	15376.8	14330.2	12194.9	16468.2	16017.9	13776.1	17329.8	18411.8	14949
TGTVPLEVR	Q9JK72	Fatty acid synthase	24271.5	22290.8	21627.4	21078.5	24486.5	19859.6	21692.8	21513.9	26201.6	19929.4	24470.6	27861.8	19003	23706.9	25398.7	21253.4
QSLQLPTR	Q9JKE3	Fatty acid synthase	5772.08	5988.83	6134.5	5751.92	6986.29	6456.04	6755.43	4954.75	7706.51	5095	5889.47	6616.04	6141.08	6488.98	7583.43	5760.42
QSPLLIGSTK	Q9JL55	Fatty acid synthase	8199.25	7909.06	7829.96	6867.85	9081.93	6297.85	7602.44	7570.22	6835.29	8347.92	8546.57	9453.05	8137.84	7875.87	9378.16	7049.63
QQEQLVPTLEK	Q9JLA3	Fatty acid synthase	4918.05	5707.45	6740.49	5226.28	7802.69	5837.53	6476.15	7496.84	3698.05	5305.98	6496.22	7621.35	6858.51	9634.87	8220.56	7836.77
EHDLVLPIR	Q9JLG9	Fatty acid synthase	8217.57	7028.49	7668.99	6278.05	7889.84	12226.4	7977.35	7622.88	8647.76	5609.42	7113.12	9169.58	7461.68	9428.25	13051.1	11777.8
VYATILNAGTNTDGCK	Q9JLJ3	Fatty acid synthase	811.861	1054.72	N/A	1389.66	901.219	503.665	1157.8	1032.4	1642.54	1562.05	1310.18	1333.46	1943.35	1256.98	1682.86	N/A
SDEALKPLGVK	Q9JLT0	Fatty acid synthase	911.219	1254.07	1412.92	742.032	650.965	736.509	626.127	837.518	1147.08	744.249	595.871	1039.15	1509.3	682.951	1557.17	847.819
AVAHILGIR	Q9JLZ1	Fatty acid synthase	N/A	1757.96	2140.45	2333.31	1970.68	1557.14	2327.94	1841.69	1908.36	1952.35	1358.43	N/A	3144.34	2311.58	N/A	2077.96
VTAIYIDPATHLQK	Q9JM15	Fatty acid synthase	3410.33	2097.14	6218.09	2686.52	4353.07	3831.27	6007.63	4147.21	6162.22	4438.28	5686.11	3746.68	2908.85	3798.08	3523.54	4403.14
YHGNVILLR	Q9JM53	Fatty acid synthase	7737.44	5538.44	7242.55	6223.36	6595.54	7387.84	9388.5	8236.62	9397.35	3114	7860.7	7775.95	7588.73	9190.64	7510.11	7644.43
EQGVTFPSGEAQEQLIR	Q9JMJ4	Fatty acid synthase	6037.64	2799.65	3222.99	1125.46	3500.12	N/A	3656.58	4011.64	5303.95	1594.05	3364.02	5154.29	4486.22	4089.04	7308.6	4966.65
GVDLVLNSLAEEK	Q9P290	Fatty acid synthase	6997.03	5255.35	5434.91	3555.89	6722.51	5862.81	5886.29	5417.07	4974.27	4395.91	6375.25	7488.65	5000.67	9857.14	13465.3	6259.34
AGLYGLPK	Q9QUL6	Fatty acid synthase	7812.14	6457.51	6581.9	5851.04	N/A	6835.81	6647.82	6847.06	7439.79	6061.4	7714.75	7473.78	6400.77	7385.9	8506.34	7022.62
ACIDTALENLSTLK	Q9QUR2	Fatty acid synthase	2662.66	2113.89	1964.18	1729.27	2255.96	3486.61	2142.41	2817.38	2822.49	1956.85	2025.91	3899.18	2882.65	4582.7	7735.36	3448.35
VLEALLPLK	Q9QVC8	Fatty acid synthase	N/A	2603.13	3737.8	1870.46	4473.8	6098.25	3223.49	3938.08	4740.83	2691.25	4385.35	5639.33	3512.98	6141.75	9973.99	3907.31
FPQLDDTSFANSR	Q9QWN8	Fatty acid synthase	2661.57	2559.67	3633.45	2589.02	3723.8	2662.5	3304.85	2585.44	3188.99	2992.68	3504.79	1988.81	3079.05	N/A	2988.55	2703.96
RQQEQLVPTLEK	Q9QX69	Fatty acid synthase	1754.81	N/A	3209.83	3452.52	3603.88	3070.82	3488.86	2904.05	1668.54	2615.94	3996.95	3236.61	2893.69	3346.64	2260.12	2676.15
AEAVVAVLLTK	Q9QX79	Fatty acid synthase	4398.82	3154.49	3438.27	3801.9	3653.97	4047.44	5254.15	4708.15	4798.08	3225.57	4916.18	4177.91	4641.71	5663.18	N/A	4274.81
DNLEFFLTNLGK	Q9QXQ0	Fatty acid synthase	1115.99	348.75	905.283	280.102	644.811	207.291	510.945	812.646	N/A	476.795	912.357	933.168	884.25	1931.65	N/A	367.206
LQVVDRPLPVR	Q9QXU8	Fatty acid synthase	N/A	1682.14	2644.85	3905.65	N/A	1518.17	3489.42	1487.44	2145.18	3223.73	2813.46	N/A	2962.61	N/A	1317.15	2803.68
LFDHPEVPIPAESESVSR	Q9QY16	Fatty acid synthase	13685.5	10434.4	10155.4	7164.67	11072.6	10863.6	9877.07	11376.6	11904	7685.71	9915.92	15604.6	9128.24	10477	13206.9	11259.4
TMEAVQGLLEQGR	Q9QY17	Fatty acid synthase	N/A	2005.06	2392.86	2747.83	2463.49	2803.68	1431.7	2009.47	1437.74	1937.91	3025.53	2620.42	2317.48	2537.07	3106.29	2181.25
VTLATLK	Q9QYC6	Nucleophosmin	18887.3	14241	10447	10214.5	11741.2	16137	12106.5	15041.5	17718.5	8852.77	13107.2	15104.2	11584.5	9783.33	12618.8	14088.7
MSVQPTVSLGGFEITPPVVLR	Q9QYF3	Nucleophosmin	6453.24	3774.91	3524.7	1330.29	11182	14702.9	6347.48	5888.82	8867.97	1660.48	21002.8	8399.31	2763.64	9959.6	13763.5	5319.03
LIGPNCPGIINPGECK	Q9QYG8	Succinate--CoA ligase [ADP/GDP-forming] subunit alpha, mitochondrial	21429.3	7699.97	10586.1	5012.29	8191.53	12040.8	7700.39	8259.87	23446.5	9121.82	6781	9129.41	12104	15027.2	17815.4	16461.9
QGTFHSQQALEYGTK	Q9QYH1	Succinate--CoA ligase [ADP/GDP-forming] subunit alpha, mitochondrial	5780.52	5452.69	5175.85	4371.74	6093.08	5078.13	4865.16	6304.02	4724.47	2094.1	6185.3	7141.24	2100.11	8208.95	7338.55	6346.21
AKPVVSFIAGITAPPGR	Q9QYU4	Succinate--CoA ligase [ADP/GDP-forming] subunit alpha, mitochondrial	N/A	6945.93	7113.14	7909.6	3141.23	4445.84	12797.5	4759.4	7776.71	6703.82	10691	N/A	9676.26	10521.5	4083.48	14256.2
IGADFLGR	Q9QZ81	Aspartate aminotransferase, cytoplasmic	200476	153567	169106	111812	176704	198406	150399	162786	169807	100628	178595	193830	125701	167981	188070	180003
VNLGVGAYR	Q9QZ86	Aspartate aminotransferase, cytoplasmic	170507	150808	164100	131919	156984	175600	153756	133744	124113	147258	169790	153872	132884	179123	182056	184648
VGNLTVVGK	Q9QZA2	Aspartate aminotransferase, cytoplasmic	97723.1	79547.9	109395	78261.7	96198.6	135670	86213.9	89218	87015.6	73400.1	105704	117322	78485	98476.8	102862	100436
NFGLYNER	Q9QZM5	Aspartate aminotransferase, cytoplasmic	92911.2	98971.8	90254.5	78683.2	88225.9	87759.6	86372.8	85952.6	101876	84562.2	96187	88736.2	83112.4	95815.5	101664	104238
NLDYVATSINEAVTK	Q9QZM6	Aspartate aminotransferase, cytoplasmic	11753.8	11792.3	11217.7	7128.9	9514.85	12865.9	10648.9	10546.5	10616.4	7000.44	11445.8	13500.6	9578.75	13040.3	17202.9	14281.7
KVNLGVGAYR	Q9QZR6	Aspartate aminotransferase, cytoplasmic	6968.89	5506.35	7679.41	6261.77	7919.62	8189.7	7959.2	6670.09	7704.95	6697.94	7529.89	5417.7	4894.24	9054.03	9304.58	9055.1
QVEYLVNEK	Q9R037	Aspartate aminotransferase, cytoplasmic	1388.91	3312.55	2108.82	1927.82	2098.03	N/A	1980.41	3683.8	2149.26	2650.47	3755.59	2611.97	2674.41	3071.66	3806.09	4722.3
VGGVQSLGGTGALR	Q9R063	Aspartate aminotransferase, cytoplasmic	363099	187587	196542	156481	203905	229900	334752	167913	352246	155445	186772	242515	279844	422173	430849	394901
SCASQLVLGDNSPALR	Q9R1N3	Aspartate aminotransferase, cytoplasmic	133293	111999	106190	67141.3	98262.5	114769	94280.4	110573	141006	77272.7	95839.6	126184	78762.2	110406	133371	111833
APPSFFAQVPQAPPVLVFK	Q9R1R4	Aspartate aminotransferase, cytoplasmic	53126.8	23698	69578.2	18210.3	63857.5	140857	62127.7	41560.3	91917	28134	159904	47002.9	60848.4	111209	206403	90227
IVATTLSNPELFK	Q9R1Z0	Aspartate aminotransferase, cytoplasmic	228838	167068	193575	56350.1	209791	238081	152916	191513	223356	61802.4	199140	260758	127210	205711	289632	205978
TDDSQPWVLPVVR	Q9WTP0	Aspartate aminotransferase, cytoplasmic	46084.1	26671.7	13408.6	12944.5	18276.9	32203.1	23082.4	31401.4	58253.3	18057.1	12585.1	26337.4	26824	23910.2	42338.6	23001.3
ITWSNPPAQGAR	Q9WTT7	Aspartate aminotransferase, cytoplasmic	19969.5	20639.9	24924.2	18369.5	11881.1	18253.9	25077.3	24347	27747.3	22515.1	7165.97	18588.2	23451.5	14994.5	18656	18255.1
ATGAEEYAQQDVVR	Q9WTV0	2',3'-cyclic-nucleotide 3'-phosphodiesterase	1063.46	1267.27	911.249	1205.74	1197.25	943.91	1298.57	1041.61	1249.83	1992.56	880.727	N/A	1299.85	2905	1756.88	1786.72
NFAIGYYLK	Q9WU34	Glutaminase kidney isoform, mitochondrial	5369.92	6498.74	7689.51	4726.62	6634.05	7398.93	6972.85	4319.5	10116.2	5633.55	7869.95	3125.73	5531.96	11438.3	6933.92	8156.29
YAIAVNDLGTEYVHR	Q9WU70	Glutaminase kidney isoform, mitochondrial	10216.2	5427.07	5870.85	4291.45	9028.58	4969.98	11120.5	4848.89	5330.84	5469.32	9768.17	7854.28	6061.69	10004.4	8781.25	6350.42
VADYIPQLAK	Q9WU82	Glutaminase kidney isoform, mitochondrial	52923.2	44077.2	43644.8	31736.4	49302.2	46013.3	44445.5	45817.2	45597.6	33272.6	45933.6	53041.5	35263.9	47282.4	47242.5	53421
LTLQTTSDGVMLDK	Q9WUC8	Glutaminase kidney isoform, mitochondrial	823.34	2301.32	3133.9	1875.91	2420.56	2969.26	2040.9	2886.44	N/A	2087.64	4197.64	3126.7	2467.15	4786.49	2538.63	2319.13
FDYVMQFLNK	Q9WUH4	Glutaminase kidney isoform, mitochondrial	N/A	1400.47	2936.02	1963.16	3541.25	2011.75	1274.12	1476.26	N/A	1488.47	2696.36	1740.46	1757.28	2172.28	2526.33	1715.69
EVFEDAVEIR	Q9WUS0	Nucleolin	66244.2	78971.4	69972	40300	78272	71048.8	59718.2	68954.5	56043.1	52845.9	76337	83762.7	59628.1	66858.2	87608.9	76546.5
NDLAAVDVR	Q9WV25	Nucleolin	65168.4	73110.4	66855.8	53289.3	84943.5	68071.7	63245.4	60182.8	71002.2	56133.1	63061.4	70801.6	68000.4	64309.9	77424.1	77333
SVSLYYTGEK	Q9WV63	Nucleolin	64593.6	74382.9	67036.4	50236.6	81807.2	65361.8	64802.2	60133.5	56819.5	55794.2	62364.2	60904.8	69418.6	72328.3	87529.8	78730.6
GLSEDTTEETLK	Q9WVB1	Nucleolin	57853.1	75365.9	56354.3	31733.8	59239.7	49393.4	44343.8	51359.2	63764.9	43712.9	53379.4	62672.1	48634.8	61316.8	59787	49734.7
ALVPTPGK	Q9WVC0	Nucleolin	49121.1	43218.1	42904.1	29822.3	55110.8	51280.8	40832.1	39925.5	28083	31239.8	47624.3	53617.4	39079.6	44675.6	50715.3	43202.3
VAISELFAK	Q9WVE9	Nucleolin	47189.6	44435	38654.8	28089	56795.2	39868.8	36059.4	32710.7	48897.2	29338	42762.6	45293.1	34480.3	53771.3	69868.2	43622.8
NLSFNITEDELK	Q9WVK3	Nucleolin	23451.8	21285.2	18255.6	11899.8	21985.5	19484.8	19220.1	23370.1	13617.3	15923.9	20803	28590.1	17591.4	22319.3	35049.5	20150.6
IEGSEPTTPFNLFIGNLNPNK	Q9WVK7	Nucleolin	15140.9	11996.7	25121.6	5660.26	41484.1	55156	18066.1	19541.9	16497.3	8696.91	55368	24892.5	18823	22364	65613.9	25634.1
GFGFVDFNSEEDAK	Q9WVM4	Nucleolin	16488.9	14739.1	12866.7	6533.71	21094.9	16422.1	10581.8	15155.2	14156.5	8306.69	15404.4	17809.5	13296.6	15453.6	21421.2	18717.2
FGYVDFESAEDLEK	Q9WVR6	Nucleolin	16326.5	9897.01	10837	5911.2	16722.5	11518.5	9709.15	14299.4	14242.9	6704.69	14196.8	14714.8	11958.9	14568.5	25210.7	17928.3
TLVLSNLSYSATEETLQEVFEK	Q9WVS2	Nucleolin	574.378	905.171	1064.29	467.19	1689.73	N/A	986.916	816.135	1048.93	588.802	1530.13	1264.6	789.872	1326.09	N/A	1761.75
ALELTGLK	Q9Z0J8	Nucleolin	59735.5	53737	61845.7	46273	73842.4	57001.1	50888	52652.9	54104.3	43518.5	62188.3	69430.1	54877.9	72105.4	76316	65448.6
GIAYIEFK	Q9Z0V6	Nucleolin	59938.1	45071.1	46147.5	29247.3	65198.6	48308.3	41550	43165.1	53722.3	35774.6	58213	52389.5	44886.3	49471.2	46205.3	55340.2
VTLDWAKPK	Q9Z0W5	Nucleolin	1472.45	1433.06	2424.89	2080.62	1798.02	1468.02	2437.12	2365.11	2424.75	1446.4	748.869	1438.64	1511.71	1237.69	N/A	2409.76
GYAFIEFASFEDAK	Q9Z142	Nucleolin	5075.39	4923.17	3500.33	2109.5	4313.2	2163.93	3340.67	6615.36	6310.58	3073.99	3715.43	4142.73	3560.19	3131.04	N/A	3799.86
KFGYVDFESAEDLEK	Q9Z1A5	Nucleolin	2222.42	2014.88	2806.06	2443.77	N/A	1465.93	2668.66	2218.5	1351.35	1654.05	2960.56	2885.53	3461.29	1211.5	1168.95	2248
ELGITALHIK	Q9Z1A6	40S ribosomal protein S14	3073.48	2776.38	2438.27	2005.4	3142.69	3732.16	2567.8	3319.91	4970.12	2424.78	3519.23	3620.46	2486.48	5850.85	3456.92	4020.67
IEDVTPIPSDSTR	Q9Z1B2	40S ribosomal protein S14	19892.6	19929.1	18450.1	14158.2	18309.2	17124.5	13099.2	19905.9	17816.6	12822	22520	21928.3	14884.8	17725	19078.9	18882.8
DESKEPIVEVR	Q9Z1M9	Neural cell adhesion molecule 1	82110.8	52571.9	79245.1	54560.6	73973.6	79096.3	70235.3	70406.9	48682.9	62960.6	69612.2	77521	65714.5	81742.3	88259.7	64846.1
CVVTAEDGTQSEATVNVK	Q9Z1N3	Neural cell adhesion molecule 1	36755.8	30474.1	29744.9	23875	34145.6	39362.9	32683.1	28592	24971.9	28194.9	23635.6	32756.3	29399	31582.8	39779.7	27138.7
AAHFVFR	Q9Z1N4	Neural cell adhesion molecule 1	30778.9	23450	32258.9	26271.2	38825	33849.9	35869.5	25425	54434.7	36714.7	30079.5	24140	30052.8	31085.3	31102.1	35406.5
NDEAEYVCIAENK	Q9Z1W6	Neural cell adhesion molecule 1	3789.79	3738.12	3182.14	3717.44	3347.46	4502.21	4247.28	3555.22	3034.79	4391.74	4857.82	2523.4	4984.52	3607.93	5122.34	4020.37
SEPQESEAKPAPTEVK	Q9Z1X1	Neural cell adhesion molecule 1	5281.77	2456.83	4534.8	3427.31	3139.4	5716.99	6466.12	4565.99	5324.77	3756.37	2064.38	5789.1	3935.78	5934.59	8714.15	2428.94
HTEPNETTPLTEPEK	Q9Z1Y3	Neural cell adhesion molecule 1	3857.28	2598.17	2993.7	2053.45	3265.34	4048.71	3867.89	3048.27	1767.52	3010.69	3655.15	3404.36	3301.73	2881.56	5552.98	2642.91
DIQVIVNVPPTVQAR	Q9Z250	Neural cell adhesion molecule 1	334003	79305.8	81179.8	39247	117014	150730	81571.5	93676.9	149739	56036.7	133162	88167.2	72143.8	179799	207068	121543
HIFSDDSSELTIR	Q9Z269	Neural cell adhesion molecule 1	16239.9	17184.2	15156.3	11948.9	16514.3	21049.2	16643.8	15477.2	14369.9	15838.9	14741.7	14496.1	18038.5	15098.4	10592.1	15166.2
ALASEWKPEIR	Q9Z270	Neural cell adhesion molecule 1	14062.5	11299.6	13968.3	12005.2	13970.3	30405.1	18318.8	11345.4	18447.2	12685.7	9603.81	24685.2	14445.3	16402.1	16498.5	9832.71
SLGEEAWHSK	Q9Z2F5	Neural cell adhesion molecule 1	8637.95	2946.37	4593.26	2601.57	4859.93	4478.67	3835.35	6664.88	5202.1	3218.87	1603.12	5782.42	3573.39	4345.93	8259.34	3046.05
FIVLSNNYLQIR	Q9Z2G8	Neural cell adhesion molecule 1	30146.3	30841.2	15747	16255.7	51590.3	32017.2	36009.4	22956.5	65853.5	20600.3	23422.1	16370.9	24010.8	36656.1	6605.24	28933.6
LPSGSDHVMLK	Q9Z2L0	Neural cell adhesion molecule 1	12462.8	8693.87	8680.89	5040.99	13301.1	10577.5	4378.53	10486.8	6075.21	5300.3	11298.4	8052.97	6001.14	13648.5	9239.49	8287.27
IGQESLEFILVQADTPSSPSIDR	Q9Z2Q1	Neural cell adhesion molecule 1	25507.6	27160.4	21938.8	8165.83	44551.3	27733	28888.5	31722.7	24281.3	19633.6	27034.8	40434.5	17042	19080.1	29463.8	20740.1
GLGEISAATEFK	Q9Z339	Neural cell adhesion molecule 1	456469	321422	376668	244605	450619	408592	340008	358836	444964	302800	362177	486714	332279	402317	531064	383546
NVDKNDEAEYVCIAENK	A0A0G2K2P5	Neural cell adhesion molecule 1	99457.5	69699.6	171292	71023.3	194767	169765	163710	88945.3	176125	72524.5	154744	182228	87929.1	86068.1	111684	86366.9
FFLCQVAGDAK	A0JPJ7	Neural cell adhesion molecule 1	209182	150881	140732	99177.7	169162	167314	148848	149442	252984	126638	144654	197826	140631	167641	202091	158467
HTEPNETTPLTEPEKGPVETK	A0JPJ7	Neural cell adhesion molecule 1	3221.14	1351.08	1177.45	1445.91	611.772	N/A	2136.64	1327.46	2842.07	1208.59	2085.37	1368.6	1937.4	N/A	2107.51	2106.59
VEPYSSTAQVQFDEPEATGGVPILK	A0JPJ7	Neural cell adhesion molecule 1	235239	114231	85152	63647.9	246058	274358	117522	184245	208256	116823	205554	197575	128587	172087	582829	199691
EANMEGIVTIMGLKPETR	A1A5S1	Neural cell adhesion molecule 1	9973.04	14906	24747.9	7763.28	19514.2	16946.2	11686.5	19057.7	11852.9	5916.05	38678	27613.7	5176.1	26538.9	18664.9	14983.5
VFFEQGATR	A2RUW1	Ceruloplasmin	15055.2	13623	14231	11055.9	14315.4	12537.7	12598.9	15374.3	15071.2	14592.8	13706.2	14297.8	14997.2	14103.7	16988.3	12213.7
GQFEDVTLYQGER	A4L9P7	Ceruloplasmin	6715.62	4355.31	4265.9	1744.16	4854.41	3805.7	4096.21	5587.13	5684.28	2512.57	4812.87	4778.05	5639.05	4001.87	5295.61	3967.87
DIASGLIGPLILCK	A7VJC2	Ceruloplasmin	6511.2	1850.25	6019.22	585.227	7615.73	16968.9	3525.04	5933.25	7488.42	2155.75	9570.46	4721.82	4737.65	6785.34	22495.9	5524.28
SSTVAPTLPGEVR	A7VJC2	Ceruloplasmin	34311.4	26898	28722.9	19208.4	29078	28492.8	26400.8	28983.7	25913.7	24422.8	28347.2	34721.6	30454	35130.4	33547.8	26577.8
DLYSGLIGPLIVCR	A7VJC2	Ceruloplasmin	5313.58	974.764	6136.1	914.807	8061.02	15902.3	2963.43	4833.12	3396.9	937.44	4465.69	3691.59	4006.77	9784.04	N/A	4627.38
ALYSEYTDGTFTK	A7VJC2	Ceruloplasmin	6020.43	3608.42	5235.07	3851.65	4954.89	5071.48	5111.51	6686.42	4907.19	4927.03	5092.04	5143.14	5640.96	4786.98	6540.82	3842.32
DIFTGLIGPMK	A7VJC2	Ceruloplasmin	2809.4	3009.24	5531.29	1971.86	5616.88	7448.61	1554.1	4128.41	1757.31	2433.57	7781.61	3190.35	3130.13	4827.43	6261.88	2992.29
MYYSGVDLTK	A7VJC2	Ceruloplasmin	2344.35	2570.35	4041.8	3029.64	3932.41	4465.16	2354.87	6344.08	1822.27	2485.84	5337.86	2012.5	2977.58	4806.53	2867.41	1853.67
EMGPTYADPVCLSK	B0BN85	Ceruloplasmin	1306.93	2316.85	3167.84	2716.99	2792.64	N/A	N/A	4164.71	1473.21	2205.12	3967.48	2745.6	2953.57	3820.04	N/A	1564.95
AGLQAFFQVR	B0BN93	Ceruloplasmin	1315.44	N/A	3750.55	2502.44	3827.23	2510.03	2127.18	769.65	N/A	2295.33	3950.29	410.005	2087.18	2188.92	N/A	1662.58
INAANIATDDER	B0BN93	Sodium/potassium-transporting ATPase subunit beta-2	123799	121569	126825	85709.9	101235	141738	116736	117783	94139.8	92457.4	129718	150028	104235	130100	127281	104586
EFVWNPR	B0BN93	Sodium/potassium-transporting ATPase subunit beta-2	75609.7	54719.2	71464.6	46674.4	43961.4	65305.1	67606.9	64945.9	77538.5	49027.3	26924.4	59641.2	68319.6	61764.5	48693.2	61176.9
SCGQVVEEWK	B0BNE5	Sodium/potassium-transporting ATPase subunit beta-2	11939.2	11279.6	17777.5	12247	9381.77	12810.9	17814.3	14229.4	15050.4	11356.8	5507.23	13223.6	18882.7	10913.9	12678.6	13341.2
INAANIATDDERDK	B0BNE5	Sodium/potassium-transporting ATPase subunit beta-2	9377.76	3943.93	7171.93	4284.78	9211.6	5605.28	5371.35	5211.13	6559.1	4407.12	5158.57	7536.58	3521.11	8103.59	6901.46	6704.52
FLNVTPNVEVNVECR	B0BNE5	Sodium/potassium-transporting ATPase subunit beta-2	8235.01	3013.27	4820	1980.49	2994.84	5033.6	2967.5	6293.53	N/A	2413.01	4664.11	N/A	4013.28	5280.51	6735.04	7860.4
VTSVVVDIVPR	B0BNE5	Acylamino-acid-releasing enzyme	3796.56	2466.51	3230.24	2834.54	2671.28	2209.62	2254.81	2519.95	2559.7	4445.94	3630.78	1714.42	2925.49	2460.51	909.336	2735.66
QVLLSEPQEAAALYR	B0BNF1	Acylamino-acid-releasing enzyme	3655.66	1665.37	1895.08	1492.68	1677.67	2150.73	2136.23	2083.33	3172.77	1421.96	1336.75	N/A	2240.42	N/A	4317.72	3625.1
AIFASGSPFDPVTLPDGR	B0K020	NADP-dependent malic enzyme	1324.28	1188.97	1141.76	477.6	1489.84	813.805	854.673	1478.24	1759.99	845.349	926.494	1357.51	1347.74	2542.76	3445.73	1880.27
TIYAGNALCTVK	B0K020	Electron transfer flavoprotein subunit alpha, mitochondrial	10005.9	9594.07	7660.8	7709.09	10154.2	11264.6	9087.74	9710.12	9248.73	8019.61	6903.83	8423.62	6357.16	9187.67	9169.96	N/A
GLLPEELTPLILETQK	B1WC61	Electron transfer flavoprotein subunit alpha, mitochondrial	3707.8	705.388	1481.19	303.45	1451.74	6202.64	2371.95	2166.17	3986.6	619.879	4019.76	2627.27	2496.32	4519.52	8654.23	3194.42
LGGEVSCLVAGTK	B1WC61	Electron transfer flavoprotein subunit alpha, mitochondrial	7311.23	7057.18	7737.64	5725.71	6176.95	7037.51	7039.55	7469.02	6018.22	5306.3	6273.07	8020.07	5887.06	9871.52	9774.43	6993.14
LNVAPVSDIIEIK	B1WC61	Electron transfer flavoprotein subunit alpha, mitochondrial	7207.72	4613.63	5100.98	2310.73	4102.44	7269.66	3982.98	6205.2	4754.01	2993.41	4173.25	6357.92	3716.6	7452.16	11440.1	4752.53
AAAEVNQEYGLDPK	B1WC61	Fumarate hydratase, mitochondrial	7916.77	8258.22	7673.91	6567.35	7800.71	7239.11	6714.26	8067.23	8218.37	6365.34	7854.03	6780.76	6775.15	8459.83	9237.41	9732.99
IEYDTFGELK	B1WC61	Fumarate hydratase, mitochondrial	13048.1	14521.3	14918.3	9729.9	16956.7	13248.8	12543.5	13776.7	12168	11484.4	16589.8	13718.4	10782.5	12855.3	16643.5	16340.1
IYELAAGGTAVGTGLNTR	B1WC61	Fumarate hydratase, mitochondrial	8108.79	3633.02	4183.34	2965.38	4317.39	4668.7	3938.63	4422.13	6985.52	2854.09	4504.18	4282.36	3642.17	5734.65	7979.48	4417.46
VAALTGLPFVTAPNK	B2GUZ5	Fumarate hydratase, mitochondrial	18598.4	10998.2	11725.2	4870.36	16511	24270.9	10263.4	10645.6	20875.1	9178.48	16175.9	10942.8	9339.18	18998.4	37832.7	12852.3
MPIPVIK	B2GV06	Fumarate hydratase, mitochondrial	N/A	3887.83	3338.52	2827.69	2776.34	4110.83	N/A	3221.05	N/A	2435.55	7483.57	4494.71	1408.59	4591.29	N/A	1746.82
SGLGELILPENEPGSSIMPGK	B2GV06	Fumarate hydratase, mitochondrial	6080.37	1939.95	2404.27	1129.97	N/A	N/A	1254.99	2938.58	N/A	964.854	4564.79	2701.57	2070.68	6920.01	7443.53	2191.55
IRPVFPQQ	B2GV06	Fibrinogen beta chain	6419.27	10569.1	9938.07	N/A	3244.97	7054.98	8549.78	7698.06	N/A	6462.91	4100.5	11518.1	5313.61	10497.2	9927.73	3827.94
YSGTCGAQLVTLK	B2GV22	Lysosome-associated membrane glycoprotein 1	3042.7	3018.95	2998.02	2236.21	3121.78	3843.5	3287.05	2522.28	2499.79	3703.26	2834.76	1852.56	3018.9	2057.46	3078.85	2326.76
DAGTITGLNVLR	B2RYG6	Heat shock-related 70 kDa protein 2	3646.4	3214.17	3986.68	2314.52	4120.16	3417.32	3369.86	3732.64	3015.65	3169.15	2970.64	4278.35	3012.26	3144.73	5887.51	3279.72
FITILGTR	B2RYG6	Annexin A5	14155	5130.26	6287.49	4133.87	7465.85	6565.34	7517.26	6639.85	8993.44	6380.67	4841.33	5720.67	6970.5	11977	9001.54	6118.18
GTVTDFSGFDGR	B2RYW9	Annexin A5	12238.8	5169.66	6278.12	3697.41	7164.7	6475.13	7213.03	7262.83	6820.74	5272.38	5021.96	6480.41	6079.87	7335.22	9318.55	6753.86
VLTEIIASR	B2RZ78	Annexin A5	237050	180522	166318	124366	168991	194371	182082	173689	188649	142877	165545	195837	N/A	260403	229539	218673
GLGTDEDSILNLLTAR	B2RZ78	Annexin A5	5839.39	810.658	1203.35	306.986	2543.75	3285.53	1755.49	2885.06	3398.49	653.335	1952.27	2600.05	1960.93	6474.91	7505.38	2325.73
SEIDLFNIR	B3GNI6	Annexin A5	17303.5	8520.56	6375.79	3046.91	8555.84	7357.93	8329.5	9610.33	10405.7	4448.36	6345.33	7606.36	7952.99	13048.6	16420.5	6222.47
ETSGNLENLLLAVVK	B3GNI6	Annexin A5	1728.84	256.418	659.092	198.842	972.577	N/A	651.294	915.1	1134.4	199.429	N/A	859.064	752.414	2265.37	N/A	478.603
LYDAYELK	B3GNI6	Annexin A5	4022.63	3053.74	2641.46	3304.56	4248.18	N/A	3215.84	3167.5	4133.4	4002.74	2629.16	N/A	3638.1	3696.97	4273.4	N/A
LLGAPQEADASEEGVQR	B3GNI6	Cystatin-C	1064.66	3586.63	1971.71	2787.04	2723.29	2094.35	2135.02	2562.23	1831.58	2756.04	3086.69	3383.37	2929.78	3521.44	3291.65	3018.86
ALDFAVSEYNK	B3GNI6	Cystatin-C	2204.97	4898.74	1378.22	2907.25	2439.43	1777.25	2714.77	4794.01	3737.03	3335.89	5778.97	4268.3	4630.67	3478.32	5659.84	6295.93
MEFTSSCPNVSER	B3GNI6	Beta-crystallin A3	3999.56	9650	2648.39	20164.5	1379.23	6480.19	5492.82	6412.91	43310.8	14535.9	2778.92	12486.2	3142.74	7809.76	13741.3	315.41
ITIYDQENFQGK	B4F777	Beta-crystallin A3	84724	132765	32536.4	228489	21544.9	70204.7	69602.4	124840	592324	192767	28813.1	148425	69797.2	52780.5	150463	18369.1
EWGTHAQTSQIQSIR	B5DEH2	Beta-crystallin A3	8029.85	10474.9	4628.99	25402.7	1450.53	5395.1	12064.6	14507.7	76924.5	18359.5	N/A	27797.9	10493.4	4243.62	12432.2	1175.95
EESLALAVK	B5DEH2	Glutathione S-transferase alpha-4	20682.3	19612.3	18215	14514.1	17366.4	19206.2	16855.4	15708	18909.4	16933.2	17074.7	22076.9	14922.6	20688.9	21283.9	19081.1
ISNIPTIK	B5DEH2	Glutathione S-transferase alpha-4	30466.1	22929.6	30413.4	20119.4	33609.1	32310.9	28742.2	28409.5	21874.8	22374.3	29029.3	38001.2	25689.5	34179.3	37333.4	32905.9
LYYFQGR	B5DEH2	Glutathione S-transferase alpha-4	19030.7	15016.2	17770.2	12832.6	13411.1	14730.9	16421	15772.7	19296.4	16652.1	16291.9	14450.6	12828.5	19704.2	17857.2	19787.2
AILSYLAAK	B5DEH2	Glutathione S-transferase alpha-4	13040.3	10371.2	11581.1	7114.5	13900.6	10504.2	10813.6	11040.5	11621.2	8611.4	11426.8	8979.66	9603.77	13561.5	17325.3	13822.5
YFPVFEK	B5DF89	Glutathione S-transferase alpha-4	22445.8	17130.5	14348.8	11979.2	18147.3	17029.6	16545.2	17086.8	19490.9	14472.8	19797.5	19495.5	15130.8	17593.3	19831.3	18762.1
LTASAPGYLAITK	B5DF89	Carboxypeptidase E	3104.06	2881.84	3165.21	2413.98	2217.43	3732.88	2006.79	N/A	3556.87	3034.54	3207.49	N/A	2601.23	2832.13	3991.07	N/A
SGILVPSEK	B5DF89	Microtubule-associated protein 2	43361.1	34816.4	54875	25602.3	38971.3	38782.3	37928.2	34078.2	30582.4	31667.2	27414.8	37633.7	31756.9	34996.5	49737.9	32205.7
TPGTPGTPSYPR	B5DF89	Microtubule-associated protein 2	28832.1	23706.2	35579.6	17271.4	26729.1	31156.9	30759.3	21721.9	19604.4	27401.6	17911.7	25900.1	20286.5	30019.1	43539	19698.8
SGTSTPTTPGSTAITPGTPPSYSSR	B5DF91	Microtubule-associated protein 2	19155.4	16872.8	24504.6	12084	18882.1	20363.2	18709.9	17429.2	10252.4	13611.6	12955.9	19050.5	10428.3	12733.6	23028	11029.6
LASVSADAEVAR	B5DF91	Microtubule-associated protein 2	3270.92	2291.77	4820.74	2581.17	2674.49	3570.31	4464.75	3464.11	2781.57	3481.81	1341.54	2401.52	3310.43	2283.15	4442.03	2553.66
VDHGAEIITQSPSR	B5DF91	Microtubule-associated protein 2	2635.98	2150.68	5853.5	2462.11	5900.46	3831.3	3289.7	2944.7	2520.1	5817.36	3023.11	5796.11	1904.41	1799.48	3796.08	1589.7
GVSGDREENSFSLNSSISSAR	B5DFC8	Microtubule-associated protein 2	468.831	1059.88	2779.83	1310.63	456.5	1098.18	2099.34	1258.77	N/A	1186.85	N/A	522.994	1334.51	1044.92	1210.57	540.94
IPCFPIESK	B5DFC8	Microtubule-associated protein 2	1980.59	1098.69	2958.33	2025.41	N/A	N/A	4612.23	1033.23	N/A	4035.11	N/A	1648.27	2144.35	1756.63	2574.48	1365.67
SDTLQITDLLVPGSR	B5DFC8	Microtubule-associated protein 2	25476.8	8282.14	14951	3241.88	15572.6	19932.2	12441	12507.5	15685.9	6573.3	7781.85	12630.3	11925.3	21331.4	60393.6	12217.6
DLATDLSLIEVK	B5DFC8	Microtubule-associated protein 2	2652.55	1098.84	3800.29	713.518	2647.9	5177.42	2775.84	2021.85	1715.92	1473.38	1279.62	2264.06	1817.95	4815.14	14229.9	2612.64
LINQPLPDLK	B5DFN2	Microtubule-associated protein 2	22682.7	17408.1	38698.5	11848.4	16688.1	23658.6	24681.7	14449.2	15670.7	18779.6	11710.3	21513.7	10701.5	15979.1	37152.5	8117.88
FAAPVQPEEER	B5DFN2	Microtubule-associated protein 2	11386.8	9102.93	15151.6	8034.89	12479.2	13506.7	11596.9	10946.3	7116.22	10526	7396.37	11613.7	11490.5	9358.19	15504.9	8975.17
GLSSVPEVAEVETTTK	B5DFN2	Microtubule-associated protein 2	7460.26	4839.66	9180.98	2053.95	6247.83	7216.49	7494.33	N/A	N/A	3601.29	N/A	6713.41	5834.1	6347.23	10554.9	5688.73
SILTEQLETIPK	B5DFN2	Microtubule-associated protein 2	2559.39	2363.13	3806.24	1587.51	3624.04	3380.44	3897.11	2616.69	2501.55	2635.38	1133.36	3991.66	2945.65	3260.78	6223.36	1946.42
IVQVVTAEAVAVLK	B5DFN2	Microtubule-associated protein 2	6963.89	6424.82	9342.47	3032.65	6592.55	5891.74	8409.41	4042.75	3992.16	3213.91	3371.14	5336.2	4330.85	N/A	N/A	3791.11
AYIDSFR	B5DFN2	Aspartate--tRNA ligase, cytoplasmic	14380.2	11917.7	10325.4	9456.23	12661.8	10742.5	10000.4	9336.11	12744.9	10455.7	11657.5	10680.7	11799.4	10264.1	13216.9	12449.3
GFVEIQTPK	B5DFN2	Aspartate--tRNA ligase, cytoplasmic	9642.84	10768.3	10695.3	7825.58	9638.51	10674.8	11608.5	8955.75	10705	13524.2	9819.45	10082.7	9736.57	8021.88	12868.9	10059.8
EIVDAAEDYAK	D2XV59	Aspartate--tRNA ligase, cytoplasmic	6461.6	6563.51	5997.47	4813.2	6600.97	6096.96	5225.21	5649.49	6846.08	5721.63	5857.66	6276.28	5816.12	6130.82	5883.91	6487.32
ESIIDVEGIVR	D2XV59	Aspartate--tRNA ligase, cytoplasmic	4252.53	4004.13	4041.46	2231.36	4992.49	5329.48	3454.51	6001.68	4255.45	2544.76	5479.24	7035.04	3721.4	5287.8	7100.15	5120.66
FQTEIQTVNK	D2XV59	Aspartate--tRNA ligase, cytoplasmic	6119.87	4995.37	5704.58	4035.18	5769.64	5638.66	3997.15	4838.69	4255.78	4333.37	5044.1	5440.07	4671.12	5026.31	5961.96	5831.98
FLEPTLR	D3ZAA9	Aspartate--tRNA ligase, cytoplasmic	18779.2	16448	14555.1	12024.4	16102.7	16380.7	15207.4	13532	13581.6	12660	12865.3	17192	12195.2	13487.1	15464.7	14938.6
IHDPQLLTER	D3ZAA9	Aspartate--tRNA ligase, cytoplasmic	1744.66	2149.08	1701.84	2108.66	1566.89	2670.59	2304.95	2409.2	2079.63	2114.64	1699.31	N/A	2300.45	1807.8	2113.18	2918.97
VFCIGPVFR	D3ZAA9	Aspartate--tRNA ligase, cytoplasmic	N/A	2709.49	2019.86	2445.86	2495.58	N/A	2717.39	1099.5	3851.38	2827.8	2661.85	1850.92	2854.29	3138.26	N/A	2780.2
IYVISLAEPR	D3ZAA9	Aspartate--tRNA ligase, cytoplasmic	7970.29	3910.72	4599.81	3579.61	5311.14	6013.56	4330.32	3275.34	7834.4	3639.57	5537.46	4872.84	4481.39	4849.5	3973.25	6003.77
SNAYLAQSPQLYK	D3ZAA9	Aspartate--tRNA ligase, cytoplasmic	2520.72	2657.65	2602.91	2337.64	1444.75	1810.85	2394.13	2682.8	N/A	2511.39	2213.86	N/A	2244.07	2217.21	3198.24	3115.65
FSPEVPGQK	D3ZAA9	Microtubule-associated protein 1B	42483.9	43254	43732.8	39292.4	52201.5	50459.2	37527.4	39286.4	54786.7	34156.2	45055	51139.4	40671.3	43766.5	48051.2	45319
SDISPLTPR	D3ZAA9	Microtubule-associated protein 1B	37670.5	36209	41141.1	30263.7	43823.7	35146.7	41588.6	29900.6	31210.1	37785.1	25540.2	37644.3	38377	32377.9	56627.3	38099.6
AIGNIELGIR	D3ZAA9	Microtubule-associated protein 1B	65767.2	60364.4	65645.1	50750.7	78679.7	68576.7	53050.3	60639.7	76946.7	52196.2	67745.7	64530.2	57511.2	85445.9	117698	82034.5
TPEVSGYTYEK	D3ZAA9	Microtubule-associated protein 1B	16312.4	15248.2	19455.8	12428.4	19203	16960.9	18774.5	13728.6	15943.5	17936.4	11537.3	12852.4	14572.3	14551.6	29657.1	15228.1
TPQASTYSYETSDR	D3ZAA9	Microtubule-associated protein 1B	5370.06	3124.16	4043.5	2152.55	4298.27	4582.14	4151.31	2412.92	4041.12	4080.92	1755.19	2487.09	2930.42	3885.31	9187.86	2592.69
VLFPGNSTQYNILEGLEK	D3ZAA9	Microtubule-associated protein 1B	5744.49	5426.61	6572.14	2434.28	8195.17	9252.43	4664.49	5839.78	6735.18	3137.47	7795.47	7077.01	5382.61	7431.68	8967.79	6676.85
NLISPDLGVVFLNVPENLK	D3ZAA9	Microtubule-associated protein 1B	9059.25	4058.51	7093.14	2521.13	12636.6	17808.1	7439.69	8182.86	6943.06	4062.03	12615.2	8877.66	6813.49	11820.5	19288.1	11180.2
LKETEPGEAYVIQK	D3ZAA9	Microtubule-associated protein 1B	4384.08	3663.69	5637.33	4655.92	6308.56	3817.34	2836.37	5249.94	5012.41	3277.25	4892.62	5089.02	4839.61	5313.68	7116.44	6192.33
SSYYVVSGNDPAAEEPSR	D3ZD32	Microtubule-associated protein 1B	12090.8	6070.51	5577.91	5559.48	6649.66	6045.3	4131.98	4597.55	6176.83	4783.66	5711.92	4321.37	4983.27	5246.51	8369.37	6931.62
HNLQDFINIK	D3ZFD0	Microtubule-associated protein 1B	2037.18	3812.28	4404.08	4855.62	4836.96	3022.45	3291.01	3377.22	4750.07	4140.6	4354.56	3388.2	4884.02	5118.37	3912.69	4079.06
ESPVSDLTSDLYQDK	D3ZHV2	Microtubule-associated protein 1B	14815.8	15232.1	15244.5	6856.74	11913.7	11478.4	8502.13	8413.26	12770.3	11940.6	7243.07	12788.9	7986.98	12586.1	21367.7	9476.67
AAEAGVTEDQYGFLGTPAK	D3ZHV2	Microtubule-associated protein 1B	28004.7	11561.4	11713.2	8162.87	15847.8	10928.7	9648.48	10652.3	17094.1	9037.97	12385.4	12522.4	11989.1	20473.6	19336.4	15077.9
SAGFIPIKEDFSPEK	D3ZHV2	Microtubule-associated protein 1B	7614.71	6546.94	7697.3	4831.12	7885.77	5671.82	7243.85	6436.97	4778.75	6318.45	3926.05	6754.69	6656.26	6654.7	7925.28	6794.38
SPSLSPSPPSPIEK	D3ZHV2	Microtubule-associated protein 1B	3241.56	4016.66	7063.73	4310.55	4351.71	5421	5883.8	3521.15	N/A	5406.07	2809.7	3782.72	5375.32	4275.1	7239.47	3501.67
DIKPQLELIEDEEK	D3ZHV2	Microtubule-associated protein 1B	18572	18608	14120.2	12436	18837.2	36455.5	13975.1	17888.1	18893	11264.8	28658.3	23016.1	18822.7	19809.1	60492.7	21397
AETEEAEEPEEDGEDNVSGSASK	D3ZHV2	Microtubule-associated protein 1B	1810.79	N/A	434.324	1109.13	1540.78	2060.16	2636.07	2719.95	2045.23	N/A	941.829	3798.12	3170.77	3874.26	5968.48	3835.88
DFEELKAEEIDVAK	D3ZLZ7	Microtubule-associated protein 1B	4372.61	4016.53	3512.33	3445.53	6153.23	9004.62	7519.01	3742.5	4779.64	3231.7	8021.96	8696.5	5105.32	4622.34	5330.94	5425.51
SVGNAIEPVILFQK	D3ZLZ7	Microtubule-associated protein 1B	64523.8	23835	20720.6	8862.17	67096.6	44898.2	13328.5	48579.5	71384.5	12452.9	48935.7	58285.1	17497.6	75542.6	167741	54582.1
SPPLIGSESAYEDFLSADDK	D3ZLZ7	Microtubule-associated protein 1B	3121.15	441.434	1252.46	433.737	1200.33	1127.12	1141.34	1890.01	1896.05	742.319	470.973	976.005	1346.44	1350.88	14072.8	2016.27
LEMYVLNPVK	D3ZLZ7	Microtubule-associated protein 1B	4540.21	8405.11	12315.6	5446.31	16012.1	13552.1	5197.95	9548.14	4612.11	4070.36	18528.5	3177.85	8338.56	13364.8	14339.8	10374.4
ITSFPESESYSYETTTK	D3ZLZ7	Microtubule-associated protein 1B	7332.64	2379.62	3810.91	2298.96	7153.58	2828.05	5590.26	N/A	6086.48	5459.5	3591.73	4926.65	4669.02	4311.59	10877.9	5921.39
DLTGQVSTPPVK	D3ZLZ7	Microtubule-associated protein 1B	98498.9	86689.8	91719.3	40677.4	109976	115265	71716.6	82438.3	94607.5	74695.4	100098	113792	87269.4	96244.7	118827	103882
TTEAAATAVGTAAVAAAAGVAASGPAK	D3ZLZ7	Microtubule-associated protein 1B	72286.2	56582.1	48638.4	27333	72953.4	96494.9	41342.7	54940.3	75833.2	37546.9	74003.8	66213.8	52085.8	64239.2	175794	70267.9
ETEPGEAYVIQK	D3ZLZ7	Microtubule-associated protein 1B	18734.2	21252.7	22628.2	17995.8	20323.4	21094.9	17044.5	22772.6	18464.4	21188.3	21646.2	23628.1	22615.5	23613.2	31539.6	23046.1
TPEEGGYSYEISEK	D3ZLZ7	Microtubule-associated protein 1B	8433.14	6367.91	9724.86	3300.18	8437.92	7967.91	6709.46	6994.3	6279.43	7582.98	5044.81	4927.69	7117.6	7820.77	13824.9	7768.26
STEEACFTLQYLNK	D3ZLZ7	Microtubule-associated protein 1B	3719.97	3417.82	1649.86	1762.14	2925.18	2095.17	2449.77	3345.13	1751.27	1372.77	1168.17	2283.96	3578.4	2184.46	1673.08	3042.95
SVNFSLTPNEIK	D3ZLZ7	Microtubule-associated protein 1B	43680	32632.4	38072.4	23325.8	52757.4	45390.6	38282.3	37763.2	36681.5	31823.5	32812.1	43721.5	36909.2	46663.8	77162.5	49575.6
SAGFIPIK	D3ZLZ7	Microtubule-associated protein 1B	16869.3	15203.7	16739.1	12668.1	15802.8	17248.5	16478.5	13112.6	13555.4	15348.9	14173.4	21225.6	14400.2	17100	20500.7	13725.1
TLEVVSPSQSVTGSAGHTPYYQSPTDEK	D3ZQL7	Microtubule-associated protein 1B	11952.2	7885.82	9601.14	6125.57	10991.7	7927.05	11161.7	9349.19	9760.27	7984.06	6856.65	8226.6	10212.4	8418.47	16656	13991.6
SDVLETVVLINPSDEAVSTEVR	D4ABY2	Microtubule-associated protein 1B	7685.25	6343.54	5618.99	5115.68	10520.4	3812.97	4469.07	8059.77	9302.45	5239.26	7786.31	7413.49	3408.8	5335.11	19717.8	7347.6
TPEDGGYSCEITEK	E9PU28	Microtubule-associated protein 1B	4651.63	2667.31	5676.44	3050.88	5669.47	4299.8	4602.83	2806.2	3625.56	4164.94	2533.71	2358.22	4388.44	3766.05	8682.3	5212.23
NVDVEFFK	E9PU28	Microtubule-associated protein 1B	11070.2	10343	7165.47	7072.14	11067.7	10675.4	6487.55	7846.17	9160.36	7552.31	8383.55	9857.12	7397.11	7331.51	9206.04	10060.9
ESTAAYQTSSSPPIDAAAAEPYGFR	F1LMZ8	Microtubule-associated protein 1B	3966.66	3283.57	4976.88	1882.32	6424.58	3912.77	3668.44	4069.61	3194.03	3203.04	1839.82	4279.4	4185.11	2542.28	11448.1	4981.04
SPCDSGYSYETIEK	F1LNJ2	Microtubule-associated protein 1B	1717.98	1584.32	1962.37	1504.42	1997.78	1527.16	2162.55	1350.07	2115.57	2526.48	731.518	1209.56	2036.15	1127.49	3606.23	1898.91
LMITDAAR	F1LNJ2	Microtubule-associated protein 1B	10793.7	12877.9	14991.3	5813.46	3949.77	N/A	16639	4650.42	11382.5	3046.24	4145.48	30175.3	15763	4002.97	9354.07	18163.3
ESSPTYSPGFSDSTSGAK	F1LNJ2	Microtubule-associated protein 1B	4399.73	1794.78	4210.34	2311.87	3579.06	2709.95	4025.24	2675.08	N/A	2764.08	1473.46	3720.65	4278.01	5326.23	9383.37	4459.47
TIQAHDVGGYYYEK	F1LNJ2	Microtubule-associated protein 1B	N/A	1906.35	1359.8	2118.05	2175.68	1739.91	3125.69	1224.62	N/A	3028.41	1498.72	N/A	1075.79	1304.51	2545.5	1731.04
ASLTLFCPEEGDWK	F1LNJ2	Microtubule-associated protein 1B	N/A	2139.42	2170.55	1675.94	1405.05	1805.08	1642.01	2732.18	4208.75	1773.31	N/A	2760.85	3705.46	1420.83	4146.64	1450.25
ASDAEIMSSQSALALDER	F1LNJ2	Microtubule-associated protein 1B	N/A	4558.45	5181.01	3377.35	4045.03	7950.25	1990.54	3065.84	N/A	3093.08	3739.27	4682.81	2504.91	2394.07	2820.87	2570.55
LGGDGSPTQVDVSQFGSFK	F1LNJ2	Microtubule-associated protein 1B	2093.96	657.187	1180.43	405.423	N/A	1060.41	1363.07	N/A	N/A	954.407	N/A	1418.26	1811.22	1565.98	3949.97	934.515
VDSILLTHIGDDNLPGINSMLQR	F1LNJ2	Microtubule-associated protein 1B	8609.2	5934.7	13179.6	2604.36	21093.1	17103.2	10169	7425.16	16961.2	4091.6	22771.7	20104.2	6381.43	18601.7	13213.2	12605.9
DMSLYASLASEK	F1LNJ2	Microtubule-associated protein 1B	8211.96	7280.82	14769.8	8989.05	11627.7	9746.29	9262.54	9170.11	6740.9	9031.27	11272.7	7696.13	8202.63	12822.3	14403.2	9223.72
LSMKPEPLFR	F1LNJ2	Microtubule-associated protein 1B	16012.2	10215.1	19046.6	6206.43	17477.8	8167.25	N/A	11104.7	10163.4	1149.74	9016.29	N/A	12027.4	19365.3	23810	11429.1
SGFFVESPR	F1LNJ2	Potassium voltage-gated channel subfamily B member 1	9951.59	10405.7	11735.3	8008.57	9718.41	9554.14	12727.2	9475.06	9621.15	12785	8599.91	9318.47	10426.2	9121.07	13981.9	10804.5
LTETNPIPETSR	F1LNJ2	Potassium voltage-gated channel subfamily B member 1	19313.4	15669	26100.1	12158.5	21024.2	19997.6	17809.9	18177.5	13296.5	14774.9	20031.8	22350	15375.1	23271.3	30882.3	22327.9
LPASALLGEENK	F1LNJ2	Long-chain specific acyl-CoA dehydrogenase, mitochondrial	1758.97	1333.94	1211.89	1488.05	1033.54	1021.6	1695.24	N/A	1193.56	1370.32	1220.21	627.269	1282.22	549.723	1129.17	929.875
FYFENALPK	F1LNJ2	Calcium/calmodulin-dependent protein kinase type II subunit delta	8147.22	9063	7467.15	5645.85	9044.75	8811.78	5783.01	7344.75	11880.8	6404.1	9436.67	N/A	6109.8	5888.07	9577.97	6482.05
ESTESSNTTIEDEDVK	F1LNJ2	Calcium/calmodulin-dependent protein kinase type II subunit delta	1647.98	1272.25	584.683	131.124	368.79	701.35	469.363	956.844	1042.75	733.042	190.748	701.935	185.891	N/A	679.593	N/A
FTDEYQLFEELGK	F1LNJ2	Calcium/calmodulin-dependent protein kinase type II subunit delta	17666.5	10143.6	7427.65	3719.18	10086.5	10216.9	6030.5	9603.21	15738.9	6495.97	7579.77	9162.88	6803.55	11752.4	8111.79	8845.99
VTEQLIEAINNGDFEAYTK	F1LP90	Calcium/calmodulin-dependent protein kinase type II subunit delta	2245.46	1394.88	873.506	419.348	895.311	1019.03	1170.18	N/A	1093.97	983.39	899.117	1040.02	1092.19	N/A	N/A	1014.55
ASGPPVSELITK	F1LQ48	Histone H1.4	45007.6	79667.4	34678.5	33223	45290.3	45438.4	32911.6	46407.5	45925.9	26511.1	79932.5	57472.7	34448.5	40087.2	46133.7	64900.9
KASGPPVSELITK	F1LQ48	Histone H1.4	13849.3	19732.1	9038.72	11019.8	12056.4	12352.2	10964.4	14316.8	13728.7	8015.95	18409.2	16120.7	11062.2	13583.1	12961.3	17203.5
ESVQDENLVFEEFAR	F1LQ48	S-arrestin	2854041	1.77741e+06	1.74326e+06	603407	1987281	3089993	711169	2.034e+06	2646615	889282	2.00689e+06	2.31548e+06	1437904	2.15755e+06	4.3892e+06	2499754
SVTIYLGK	F1LQ48	S-arrestin	883743	621409	1.11754e+06	715133	912876	1.0086e+06	535926	446776	1.0072e+06	617322	1013976	565051	650154	1.03488e+06	798911	970242
HEDTNLASSTIIK	F1LU71	S-arrestin	350749	321097	454098	242190	302204	463422	241134	360657	389498	267907	416933	448788	325453	434170	379365	396805
AFATDITDAEEDK	F1LU71	S-arrestin	365826	335890	434138	256484	310585	456927	227108	352496	308259	266655	416483	443258	324426	380719	376527	405687
LMHPQPEDPAK	F1LU71	S-arrestin	215801	200668	332711	167839	296685	313155	101178	264528	203359	135733	304424	299452	204713	422351	243227	202171
TLVLVPLLANNR	F1LU71	S-arrestin	1.8922e+06	690917	1.35992e+06	354188	1.95038e+06	2653394	528160	913349	2225546	498850	1.54828e+06	732002	962369	2473530	4.52764e+06	1.988e+06
YGQEDIDVIGLTFR	F1MA98	S-arrestin	1.26351e+06	687052	700895	221937	1036485	1.08912e+06	348480	994278	992653	353326	946193	943224	560097	1.19141e+06	1.1422e+06	927673
DKSVTIYLGK	F1MA98	S-arrestin	12885.5	10490.4	15586.6	11262.9	17422.9	11825.3	7477.02	10471.7	15826.5	8444.18	12317.7	7312.52	11966	14529.1	11927.4	18329.2
IKHEDTNLASSTIIK	F1MA98	S-arrestin	161036	167905	180699	150415	161370	154200	154236	141029	180845	123344	198513	204726	163625	179196	172084	214707
SCGVDFEVK	F1MA98	S-arrestin	1432563	1.44585e+06	1.51158e+06	841242	1.47579e+06	3.42018e+06	824170	1.33727e+06	1.35993e+06	909144	1.4455e+06	1.62895e+06	1.17852e+06	1.47403e+06	1.60769e+06	1.52927e+06
RDLYFSR	F1MA98	S-arrestin	2205.03	1878.56	2351.3	1272.54	2263.42	2768.59	1429.29	2090.75	2224.85	1424.17	2336.52	1888.58	1512.25	3371.99	1557.44	1905.08
KVYVTLTCAFR	F1MA98	S-arrestin	16328.1	13616.1	26882.7	24397.9	21093.4	15351.5	14700.5	8222.29	30952.8	17784.1	19045.9	14513.1	15178	24938.3	6282.21	25301.6
LTVSGFLGELTSSEVATEVPFR	F1MA98	S-arrestin	51159.6	33008.5	31487.1	11385.7	31935.4	62419.8	17221.4	29528.2	59140.7	11262.4	138847	48194.6	9717.24	56782.2	97548.4	33928.7
DYIDHVSQVEPVDGVVLVDPELVK	F1MA98	S-arrestin	1.73849e+06	818771	934598	190873	1.64849e+06	2.47664e+06	706176	1.44359e+06	1584528	11783.1	2.66613e+06	1.88488e+06	915105	1.92724e+06	6.2365e+06	1.89172e+06
AFATDITDAEEDKIPK	G3V928	S-arrestin	980084	922968	1.04496e+06	546948	1021982	1.16619e+06	568505	948256	1.16578e+06	550804	885741	1.04216e+06	704051	903536	1.20337e+06	1227899
EIYFHGEPIPVTVTVTNNTEK	G3V928	S-arrestin	766650	434420	335570	378060	494376	447160	387156	957152	878067	295653	378335	501632	435369	607566	303765	969499
VSVEQIANVVLYSSDYYVKPVASEETQEK	G3V928	S-arrestin	41561.7	33927.3	25772.2	32342.3	24715.5	18732.6	16032.7	40921	68262.5	23352.4	26959.8	27126.5	31448.1	39732	57853.6	45461.2
TVMGILVSYHIK	G3V928	S-arrestin	35877	28974.6	59244.1	41274.4	36368.5	24705.8	16194.1	21159.9	22083.4	27485.2	99605.3	8934.51	28746.8	111678	17893.6	30554.6
DKSVTIYLGKR	G3V928	S-arrestin	4080.14	1464.4	4245.63	1749.77	3265.69	2052.5	1741.62	N/A	2582.11	830.01	4647.42	N/A	1506.12	4459.48	N/A	2227.8
VQVYPPVGAMSAPTQLQLSLLK	G3V928	S-arrestin	163975	99511.9	221307	93894	572686	363968	141959	199571	270201	98473.2	1.31574e+06	200220	173854	395535	806098	349015
RDYIDHVSQVEPVDGVVLVDPELVK	G3V928	S-arrestin	5039.7	7297.85	4201.18	3803.57	3524.4	5544.04	3427.87	4416.89	6121.67	3127.34	6864.41	9873.81	4165.11	4162.12	N/A	5879.53
AVDSLVPIGR	G3V928	ATP synthase subunit alpha, mitochondrial	1.52927e+06	1.21542e+06	1.01581e+06	701091	1242747	1258768	1111712	1151681	1.22355e+06	822607	1.15331e+06	1.28838e+06	880818	1.14748e+06	1.29939e+06	1.17443e+06
VLSIGDGIAR	G3V9R8	ATP synthase subunit alpha, mitochondrial	1.37344e+06	1.01651e+06	983140	708588	998250	1.08561e+06	1.03406e+06	1.0549e+06	1.13456e+06	793354	955261	1.21269e+06	786023	1.18524e+06	1.19474e+06	1.02794e+06
APGIIPR	G3V9R8	ATP synthase subunit alpha, mitochondrial	972782	703297	641544	438020	737612	1.02543e+06	653958	710752	696143	475163	659070	857049	615350	788571	818705	786528
ELIIGDR	G3V9R8	ATP synthase subunit alpha, mitochondrial	796918	662087	595399	437792	649457	703139	623728	550885	532873	504705	661708	652824	558674	776310	747071	700281
EAYPGDVFYLHSR	G3V9R8	ATP synthase subunit alpha, mitochondrial	116462	82155.1	75281.4	64525.8	90881.1	76074.5	79577.9	75640	107981	70226.6	81250.1	86154.8	70363.2	81485.2	73071.7	94040.9
STVAQLVK	G3V9R8	ATP synthase subunit alpha, mitochondrial	137580	122960	82212.2	52571.9	90687.1	118719	93753.8	105060	96065.8	65166.6	83903.3	126679	59104.6	104565	95881.6	84945.3
EIVTNFLAGFEP	G3V9R8	ATP synthase subunit alpha, mitochondrial	8616.86	2544.75	10940.4	1019.62	14312.9	36023	11954.7	8347.89	3202.05	4482.06	28754.3	17183.3	6540.4	16035	53556.9	10207.3
HALIIYDDLSK	M0RC99	ATP synthase subunit alpha, mitochondrial	180740	123990	119214	109496	108435	131244	131306	157576	159256	102426	103128	165870	122358	195624	163810	131609
GYLDKLEPSK	M0RC99	ATP synthase subunit alpha, mitochondrial	15138.5	10938.3	11354.8	10750.7	15998.9	10967.7	9783.05	11044.3	11021.6	8240.73	10424.3	8135.18	9604.6	10551.2	12113	15142.4
GMSLNLEPDNVGVVVFGNDK	O08557	ATP synthase subunit alpha, mitochondrial	41600.6	24419.3	35332.4	12819	52286.6	41888.7	28401.7	36294.8	25476.5	17211.2	121172	45876.3	20358.5	62012.2	112783	28385.9
TGAIVDVPVGDELLGR	O08557	ATP synthase subunit alpha, mitochondrial	2044470	507034	602995	211570	758812	1.09982e+06	443518	724893	1.79018e+06	372612	745680	811335	509242	1.97055e+06	4718231	1527816
TSIAIDTIINQK	O08629	ATP synthase subunit alpha, mitochondrial	364694	144623	164558	115331	153432	163931	173146	160819	302482	123949	159808	166987	291042	404676	469416	366641
ILGADTSVDLEETGR	O08629	ATP synthase subunit alpha, mitochondrial	442582	169907	160853	118781	142334	168409	341745	184945	260885	143985	128770	205334	266044	269394	303258	318304
RSTVAQLVK	O08629	ATP synthase subunit alpha, mitochondrial	547.162	573.888	314.962	541.489	336.08	1487.36	653.858	N/A	659.272	497.559	515.705	N/A	301.121	N/A	894.154	802.657
QGQYSPMAIEEQVAVIYAGVR	O08629	ATP synthase subunit alpha, mitochondrial	2434.46	1678.52	1605.58	1099.68	2902.88	1931.93	4072.48	3897.95	692.688	1142.4	3352.72	4054.65	1599.58	2095.44	860.69	1837.77
TGTAEMSSILEER	O08629	ATP synthase subunit alpha, mitochondrial	84193	86790.5	78770.8	70358.8	84706.2	87295.9	57127.2	76151.6	69368.7	65337.8	105418	70573	76528.5	108211	77849.2	72242.7
VVDALGNAIDGK	O08629	ATP synthase subunit alpha, mitochondrial	1049319	794942	428013	614267	881462	907034	828362	769675	773856	333163	840702	900871	705699	979649	988863	880063
LELAQYR	O08629	ATP synthase subunit alpha, mitochondrial	570828	491532	455393	382548	459997	546978	419982	425504	244323	408033	467839	477084	388047	508597	509767	497288
GIRPAINVGLSVSR	O08629	ATP synthase subunit alpha, mitochondrial	97569.9	51300.8	104826	62042.3	104429	67217.7	124415	33730.5	103563	87748.7	75181.7	44510.7	81284.8	137850	26765.5	117513
QMSLLLR	O08629	ATP synthase subunit alpha, mitochondrial	96691.4	68217.5	30888.3	66571.5	190342	195726	33701.5	169779	38831.3	28017.8	239967	150362	22656.2	255100	59188.6	79017.7
NVQAEEMVEFSSGLK	O08629	ATP synthase subunit alpha, mitochondrial	25071.4	12962.3	22023.1	15315.1	39767.5	29065	17877.4	26197	18190.5	11096	23256.9	22165.9	21209.4	51024	25251.6	20112.6
EVAAFAQFGSDLDAATQQLLSR	O08651	ATP synthase subunit alpha, mitochondrial	10104.9	4971.58	17042.4	2589.16	30940	20434.4	14401.6	12007.8	10974	4998.56	31275.2	16706.9	6673.09	27554.4	33819	16157.3
LYCIYVAIGQK	O08651	ATP synthase subunit alpha, mitochondrial	9746.26	7771.11	6888.5	5821.52	11752.8	4587.81	7460.48	3207.93	11405.8	10126.9	4933.27	N/A	4187.39	7884	N/A	8413.18
LKEIVTNFLAGFEP	O08651	ATP synthase subunit alpha, mitochondrial	4391.4	3046.6	3075.95	1830.27	6306.31	2488.98	2838.81	2960.84	2762.6	1774.35	1794.67	2428.43	1914.62	1819.05	N/A	3691.36
RTGAIVDVPVGDELLGR	O08651	ATP synthase subunit alpha, mitochondrial	2328.87	1854.08	3211.08	2533.26	3979.91	3465.57	2754.38	3670.24	N/A	1390.71	2188.9	3082.42	2266.31	3679.66	3676.7	4701.8
EEGLNAFYK	O08651	Phosphate carrier protein, mitochondrial	80543.6	83984	71226.4	52768.8	64490.5	77131.5	61304.8	82203	75423	66867.2	81661.6	73855.8	70681.6	83004.3	78010	79767.6
IQTQPGYANTLR	O08651	Phosphate carrier protein, mitochondrial	328194	133349	130169	98009.6	133380	136578	125908	141233	282900	95332.6	122093	149640	121204	302091	330491	343337
FGFYEVFK	O08662	Phosphate carrier protein, mitochondrial	24839.7	22171.5	12758.7	9859.59	29541.2	26673.5	18284.8	26591.1	28505.8	13033.6	26186.8	19308.4	13353.4	30604.3	20471.6	24158.3
LPRPPPPEMPESLK	O08662	Phosphate carrier protein, mitochondrial	3722.77	10988	10890.3	13092	7749.87	4465.4	14383.4	8405.25	7452.38	10912.9	22135	6809.27	12538.5	9943.08	3440.59	7553.9
GIFNGFSITLK	O08662	Phosphate carrier protein, mitochondrial	927.632	985.463	1569.18	1031.54	3642.6	1106.68	2081.62	N/A	1700.46	1712.68	1976.96	N/A	672.298	2143.3	N/A	2391.74
GLVSSDELAK	O08662	Spectrin alpha chain, non-erythrocytic 1	67951	65286.1	52748.2	56866.5	67626.4	67538.6	55956.5	75042.6	69124.1	55412.2	55314.5	79689	68715.7	82028.7	74904.7	71942.3
LLVSSEDYGR	O08662	Spectrin alpha chain, non-erythrocytic 1	63843.2	59658.2	48657.1	50953.5	58935.1	63598.7	49741.4	55949	57268.8	49127.6	55600.6	56693.1	57357.5	64177.8	71358.3	53053.2
EELYQNLTR	O08662	Spectrin alpha chain, non-erythrocytic 1	60159.1	60714.6	46796.2	52165.6	63841.6	52036.1	46154.7	64572	66643.4	53352.8	64127.1	62963.7	55355.2	67074.9	67252.8	55917.8
LSILSEER	O08837	Spectrin alpha chain, non-erythrocytic 1	51399.7	45349.9	41508.9	39572.1	42229.6	51217.4	39652.5	44603.6	47373.8	42195.1	42663.7	54614.8	47143	57921.5	53652.6	47427.4
DLTNVQNLQK	O08837	Spectrin alpha chain, non-erythrocytic 1	40695.5	37327.3	31900.8	30203.2	40596.5	38080.7	32123.3	35416.9	44314	33374.9	31716.7	42399.4	36835.1	42874.1	46145.4	36626.7
SLQQLAEER	O08837	Spectrin alpha chain, non-erythrocytic 1	39919.9	31061.1	28107.1	29859.5	41533.7	33882.7	30042.5	27120.4	37341.4	33095.7	30134.6	37123.3	34756.3	38021.8	36574.5	32972.8
DLTGVQNLR	O08837	Spectrin alpha chain, non-erythrocytic 1	79125.2	61485.8	51369.2	58430.3	72941.1	62734.2	54538.7	71665.9	73570.9	62126.7	67197.2	81653.4	63016.9	75739.8	78210.1	59439.1
IDGITIQAR	O08837	Spectrin alpha chain, non-erythrocytic 1	76294.8	58761.6	51241.4	58268.7	68554.4	65818.9	55397.9	74173.9	67425	61672.7	54892	78218.4	61101.8	66157.3	80151.9	62725
LFGAAEVQR	O08838	Spectrin alpha chain, non-erythrocytic 1	54876.7	52182.1	43094.3	48354.3	52456.6	46200	45840.6	52391.8	55777.7	45326.4	49745.2	56416.3	52181.5	50970	56704.6	53460.2
ITALDEFATK	O08838	Spectrin alpha chain, non-erythrocytic 1	41831.4	36273.8	26975.5	27563.5	39965.1	39133.2	30784.3	36712.7	38542	29977.5	37519.1	43620.1	32875.4	33731.6	43955.6	37153.8
EKLDILDQER	O08838	Spectrin alpha chain, non-erythrocytic 1	11001.1	9155.67	8408.17	9238.36	11835.9	9136.37	8929.59	9368.55	12346.3	9094.92	9382.44	12401.6	11280.8	12560.6	11198.3	10675.9
LSDDNTIGQEEIQQR	O08838	Spectrin alpha chain, non-erythrocytic 1	11420	8011.57	7880.23	8580.62	10398.7	8131.57	7290.76	9888.71	8110.14	8635.58	9013.67	12402.5	10195.9	12326.9	12896.7	9641.32
LLEAQSHFR	O08838	Spectrin alpha chain, non-erythrocytic 1	5960.89	4343.95	4216.54	3990.96	5814.8	5473.47	3667.24	5679.94	5579.1	5161.66	4375.76	5088.26	4396.7	5677.82	4707.23	4700.89
QGFVPAAYVK	O08838	Spectrin alpha chain, non-erythrocytic 1	21502	18611.8	17364.5	16587.8	23914.3	20896.9	16295.3	20429.2	19942.3	18540.2	21161	24608.6	19825.1	17284.4	22272.5	23003
DLIGVQNLLK	O08838	Spectrin alpha chain, non-erythrocytic 1	19428.4	12113.6	10822.9	5954.24	12853.2	22629.5	9393.71	14049.7	18164.1	9451.75	14516.3	16140.2	13110.6	27173.9	43302.8	15311.6
LDILDQER	O08838	Spectrin alpha chain, non-erythrocytic 1	11508.4	12665.3	10483.8	11095.4	12488.3	10954.5	10046.5	12308.1	10476.1	12076.3	12112.4	14626.6	11386.4	14504.8	13248.5	10977.9
SQLLGSAHEVQR	O08838	Spectrin alpha chain, non-erythrocytic 1	8602.01	5911.77	5422.23	3687.02	7504.3	6991.83	4785.3	5820.03	5335.41	5078.79	5115.25	7911.49	5657.65	9144.13	8577.49	6003.27
LIDVNHYAK	O08839	Spectrin alpha chain, non-erythrocytic 1	3592.67	3393.11	2686.81	3170.13	3167.52	3707.05	2955.08	4009.99	3480.74	3800.64	2908.58	3645.95	3106.86	3773.07	4050.77	4076.58
TATDEAYKDPSNLQGK	O08839	Spectrin alpha chain, non-erythrocytic 1	2725.59	2411.16	1753.73	1441.06	3152.51	3357.96	2182.51	2501.89	2331.92	2304.79	2123.69	2489.01	2608.98	3005.49	3059.4	2182.28
KLLEATELK	O08839	Spectrin alpha chain, non-erythrocytic 1	855.652	983.874	544.811	1092.08	943.198	1223.2	1066.67	1207.11	887.67	1185.45	1116.41	1644.56	1035.81	642.766	1222.58	1486.42
ADVVESWIGEK	O08839	Spectrin alpha chain, non-erythrocytic 1	6929.46	5134.31	6459.05	5472.97	5432.52	6119.85	6528.15	8259.2	8116.12	6760.38	1569.49	6007.79	9273.95	6514.95	5662.76	5643.5
HQAFEAELSANQSR	O08839	Spectrin alpha chain, non-erythrocytic 1	6504.01	4604.21	4112.33	5279.11	5709.58	10220.3	5472.38	5849.54	5976.95	4717.52	4365.06	10178.7	4965.4	5607.32	4736.94	5085.25
DVEDEETWIR	O08839	Spectrin alpha chain, non-erythrocytic 1	4819.15	3052.47	4595.07	4476.7	3762.56	5128.16	4463.27	5391.93	7820.58	4118.37	1283.86	3961.53	7272.89	2138.55	3230.34	4857.75
VNDVCTNGQDLIK	O08873	Spectrin alpha chain, non-erythrocytic 1	2633.94	3269.76	2605.6	2815.73	3393.76	2460.03	2111.84	2587.08	2223.07	3372.26	3427.81	3398.65	4200.02	N/A	3946.39	2497.63
SSLSSAQADFNQLAELDR	O08873	Spectrin alpha chain, non-erythrocytic 1	14985.6	7015.11	4894.21	3410.51	7940.7	8133.76	3966.97	8756.66	7010.35	3892.86	7290.83	10625.6	6151.05	8595.73	20433.2	7376.94
KVEDLFLTFAK	O09175	Spectrin alpha chain, non-erythrocytic 1	3128.77	4166.38	2932.13	2809.81	5854.36	5088.94	3422.11	5788.66	5386.36	2638.39	4895.97	8741.76	4010.11	4433.53	1922.67	6516.78
LIQEQHPEEELIK	O09175	Spectrin alpha chain, non-erythrocytic 1	10912.7	5813.11	5043.05	5550.58	12328.8	9815.48	5096.15	5918.01	6157.84	7772.91	5691.41	6030.92	5893.83	7279.11	11764.5	6692.29
ALINADELANDVAGAEALLDR	O09175	Spectrin alpha chain, non-erythrocytic 1	2233.28	1153.56	926.044	734.582	2164.58	N/A	927.325	1493.43	1272.05	843.722	2751.34	2405.8	976.543	1341.71	N/A	1281.6
LQQSHPLSANQIQVK	O35052	Spectrin alpha chain, non-erythrocytic 1	2279.24	2275.52	1833.55	2490.67	4742.28	4420.06	2617.67	5455.25	4807.06	2911.71	3814.93	3899.18	2844.78	4301.3	4890.05	2800.67
QETFDAGLQAFQQEGIANITALK	O35052	Spectrin alpha chain, non-erythrocytic 1	1850.48	2540.66	N/A	1359.8	2148.19	N/A	1598.59	2527.56	2243.46	1833.31	1565.01	2079.02	2154.08	N/A	N/A	1931.93
VLETAEDIQER	O35052	Spectrin alpha chain, non-erythrocytic 1	65503.6	34228.9	55341.2	50865.7	59372.7	33598	44696.5	57008.1	64851.7	52908	54953	66849.6	53649.3	68847.1	69091.9	56588.1
ENLLEEQGSIALR	O35095	Spectrin alpha chain, non-erythrocytic 1	37257.5	27124.3	32164.8	13192.8	34678.2	28326.6	28509.2	47183.9	36603.5	14082	18199	45873.4	31648.3	34136.8	33104.3	35096.7
KGDILTLLNSTNK	O35095	Spectrin alpha chain, non-erythrocytic 1	13365.7	7300.54	9446.82	4744.58	12078.9	9813.77	10606.9	10592.1	14479	4820.61	10619.5	11384.7	12861.7	15540.8	16587	11978.6
ELPTAFDYVEFTR	O35095	Spectrin alpha chain, non-erythrocytic 1	52883.1	25756.6	27728.6	6827.12	53046	46338.2	22176.5	52429.7	58770.8	20510.7	42947.8	40782.2	42211.6	59825.9	102813	37994.2
SSEEIESAFR	O35095	Spectrin alpha chain, non-erythrocytic 1	70796.2	74515	58385.8	60613.6	76465	73424.5	56868.5	76947.7	81689	62760.3	61175	84208.4	73826.7	80874.8	86632.2	77665.9
DVTGAEALLER	O35112	Spectrin alpha chain, non-erythrocytic 1	46656.6	43235.2	29658.4	26759.4	41132.7	41486	32755.5	37664.1	57546.7	33916.6	38032.9	50077.2	40619.9	43799.6	60031	43453.7
DLSSVQTLLTK	O35142	Spectrin alpha chain, non-erythrocytic 1	31597.9	27326	23601.3	14909.1	34590.4	37293.8	19704.7	31678.9	35504.8	18083.6	33260.4	40322.9	24226.8	53286.8	66377.6	31743.2
DLASVQALLR	O35142	Spectrin alpha chain, non-erythrocytic 1	35091.7	22832.6	18150.1	12146.9	37250.5	34873.5	19897.8	29931.1	50104	14684.6	31313.2	36537.2	21758.1	58358.2	85341.1	33035.9
DLASVNNLLK	O35142	Spectrin alpha chain, non-erythrocytic 1	18217.4	23598.5	17770.3	17145.7	32806.2	27304.4	15808.2	20983.7	22914	18798.2	23922.3	24805.4	17085.6	29914.4	39030.8	24579.5
LLEATELK	O35142	Spectrin alpha chain, non-erythrocytic 1	43219.1	32768	29840.7	28007.1	36025.9	38887.6	29566.2	30863.5	37490.1	31737.1	38539.6	46164.1	33544.1	36537.2	40961.9	36943.1
LQVASDENYKDPTNLQGK	O35142	Spectrin alpha chain, non-erythrocytic 1	15277.9	18427	19094.5	19779.6	22726.7	20612.7	16328.3	21919.3	15650.8	17619.4	18744.3	19765.2	20108.1	16303.9	21317	17871.8
EAFLNTEDKGDSLDSVEALIK	O35142	Spectrin alpha chain, non-erythrocytic 1	8949.26	4441.64	4840.2	3626.12	8466.03	8110	4451.63	8762.08	8455.23	5101.24	6527.85	9860.16	7685.87	9788.39	8962.13	9164
EAIVTSEELGQDLEHVEVLQK	O35142	Spectrin alpha chain, non-erythrocytic 1	7411.41	6758.49	6160.46	4136.88	7050.82	8513.23	5563.23	9750.32	10757.8	5516.16	5469.4	11521.4	6621.9	12332.1	10208.6	8705.53
EAALTSEEVGADLEQVEVLQK	O35179	Spectrin alpha chain, non-erythrocytic 1	8370.92	6409.92	7164.44	4483.27	10184	10201.5	5763.47	7251.36	1780.99	7018.87	7344.36	11906.6	8109.51	7281.62	20412.1	7038.92
NQALNTDNYGHDLASVQALQR	O35179	Spectrin alpha chain, non-erythrocytic 1	9914.54	6930.6	5369.17	5469.96	6818.14	5806.65	6039.16	8959.75	10459.3	5503.1	6240.86	6654.08	7880.48	7535	9454.68	8203.42
EQLMASDDFGR	O35244	Spectrin alpha chain, non-erythrocytic 1	3222.67	3815.19	5367.22	4783.81	6251.69	5283.04	2917.24	5900.72	3377.8	3556.69	6818.38	5694.68	5698.85	7720.59	5101.67	4686.16
HQAFEAEVQANSGAIVK	O35244	Spectrin alpha chain, non-erythrocytic 1	10137.4	9459.4	8564.85	10297.2	7307.9	8040.27	9725.45	11942.9	10109.8	9365.54	6667.98	9372.18	12558.3	14212.6	7995.64	9644.99
LGESQTLQQFSR	O35244	Spectrin alpha chain, non-erythrocytic 1	4368.5	3889.35	2927.64	4218.05	6680.32	4822.09	2958.62	4597	3838.1	3021.93	3031.73	5799.92	4721.75	4208.59	5276.33	4694.58
ELVLALYDYQEK	O35263	Spectrin alpha chain, non-erythrocytic 1	7429.85	5035.05	1687.72	2677.89	3362.56	4862.26	2894.2	5786.06	3665.69	3595.94	3264.38	7230.98	3291.6	5270.54	N/A	4827.95
WTQLLANSATR	O35264	Spectrin alpha chain, non-erythrocytic 1	1747.32	1442.77	2460.69	3206.27	3433.69	1726.86	2387	N/A	6167.91	2962.48	1837.71	2247.32	5054.59	2440.98	1786.52	3794.66
DLNSQADSLMTSSAFDTSQVK	O35303	Spectrin alpha chain, non-erythrocytic 1	N/A	4594.66	4009.99	3626.56	6737.4	4602.61	2770.95	4649.59	1712.83	3409.96	6169.65	3606.02	3583.93	3514.65	2733.7	3097.98
EANELQQWINEK	O35303	Spectrin alpha chain, non-erythrocytic 1	2673.72	906.743	1498.69	2506.28	510.393	1314.94	1496.85	2301.14	2796.67	1825.05	N/A	717.637	3409.19	1463.36	1327.14	1699.41
AALLELWELR	O35303	Spectrin alpha chain, non-erythrocytic 1	4659.41	2618.34	3216.71	1282.42	1602.59	4586.21	1551.25	4392.83	6254.68	1775.2	N/A	3893.1	3648.01	3658.51	N/A	2629.02
LEAELAAHEPAIQGVLDTGK	O35303	Spectrin alpha chain, non-erythrocytic 1	1497.94	1895.64	1155.41	2917.6	890.971	1348.36	2386.2	1437.21	N/A	2688.57	2300.39	2407.56	2182.32	1744.15	1033.01	2254.52
QVEELYQSLLELGEK	O35303	Spectrin alpha chain, non-erythrocytic 1	6552.93	1417.1	5708.34	620.577	6850.75	12769.9	4295.55	N/A	N/A	2030.61	N/A	4641.65	4161.93	7472.4	15967.7	5641.17
QFQDAGHFDAENIK	O35303	Spectrin alpha chain, non-erythrocytic 1	46722.6	29300.1	32998.5	19804.4	45955.9	38512.5	29916.4	36636.2	37309.4	22421.6	27329.7	N/A	23919.2	47757.5	41305	N/A
KFEEFQTDLAAHEER	O35303	Spectrin alpha chain, non-erythrocytic 1	4848.09	3753.94	1548.69	3361.71	1763.2	1023.92	2899.88	4092.93	8379.69	2490.44	2782.43	4025.43	2672.55	2032.29	N/A	4339.53
GVIDMGNSLIER	O35303	Spectrin alpha chain, non-erythrocytic 1	5956.21	6898.91	6898.22	6663.07	10204.5	8677.64	4352.67	8516.15	3669.56	3327	9143.89	9257.03	6965.21	11763.2	7329.52	9047.54
SADESGQALLAAGHYASDEVR	O35303	Spectrin alpha chain, non-erythrocytic 1	8002.89	9410.84	6671.79	7565.28	9241.05	8241.79	7408.68	9045.42	14518.9	8224.74	7200.6	9978.53	8366.96	10086.1	9462.61	10665.3
MQHNLEQQIQAR	O35303	Spectrin alpha chain, non-erythrocytic 1	1502.05	587.879	1392.18	1009.99	1674.51	1297.98	1378.93	1525.23	1215.36	593.431	2137.03	1344.77	1356.39	1286.46	318.349	975.316
IAALQAFADQLIAVDHYAK	O35303	Spectrin alpha chain, non-erythrocytic 1	2020.46	1992.35	1955.54	994.553	1682.01	N/A	2789.33	3454.62	5728.82	2289.53	N/A	1618.27	2992.19	4839.05	N/A	1797.42
EKEQLMASDDFGR	O35303	Spectrin alpha chain, non-erythrocytic 1	598.963	1562.65	1958.38	2601.31	3147.68	2348.47	1928.16	2215.32	683.871	1740.85	2676.51	2913.77	2240.95	1810.44	902.516	1422.43
VILPVSVDEYQVGQLYSVAEASK	O35331	Phosphatidylinositol transfer protein alpha isoform	7097.88	6860.33	5222.53	3335.5	6422.8	7202.83	6851.06	5918.58	7059.81	4540.9	7749.37	6352.8	5636.44	5053.37	14940.2	8180.11
MLAPEGALNIHEK	O35331	Phosphatidylinositol transfer protein alpha isoform	2621.32	2662.75	2189.57	2265.27	1782.32	1748.48	2490.96	3105.66	1754.12	1866.19	2932.9	3454.99	1697.71	2174.13	1339.79	1596.67
ITLPVDFVTADK	O35331	Phosphoglycerate kinase 1	215541	180137	156600	64654.3	185304	357645	113374	162870	216112	115559	197702	235881	125084	219590	425078	179771
ELNYFAK	O35331	Phosphoglycerate kinase 1	248654	203337	221036	182661	226485	240021	208237	220189	225578	179101	226299	240024	182490	247585	254349	236667
VLPGVDALSNV	O35331	Phosphoglycerate kinase 1	76253.8	50243.5	54585.9	21460.5	72360	123159	43594.8	64091.5	90895.4	34887	83585.2	73370.7	45848.2	76527	206839	76273.3
GCITIIGGGDTATCCAK	O35331	Phosphoglycerate kinase 1	271824	235967	161331	147899	172847	204346	163581	195475	232512	162306	153555	202956	174126	211275	212224	223771
AHSSMVGVNLPQK	O35458	Phosphoglycerate kinase 1	24674.6	19751.4	31610.4	24444.5	33358.6	38002.3	20235.6	31726.4	21849.9	20435.2	45287.7	25643.3	22852.5	42814	26595.4	24852.4
IQLINNMLDK	O35458	Phosphoglycerate kinase 1	56871.2	53314.3	131207	55019.2	107065	158856	44960.1	133995	46957.8	47836.4	169808	61061.6	49517.8	182201	140222	110544
VSHVSTGGGASLELLEGK	O35458	Phosphoglycerate kinase 1	243240	173263	202812	211670	141638	210883	216513	274520	277170	164461	156280	249502	219684	273096	246613	204727
SLMDEVVK	O35458	Phosphoglycerate kinase 1	41222.2	33608.5	16916.3	12578.2	23316.9	22820	36446.7	12356.6	48021.9	41521.4	11403	36482.1	40546.1	19693.9	28424.3	38155.7
DCVGSEVENACANPAAGTVILLENLR	O35476	Phosphoglycerate kinase 1	221053	89834	88338.4	25886.1	155906	200692	113421	113355	157482	53250.9	71147.1	113947	129528	253872	522538	173290
LGDVYVNDAFGTAHR	O35476	Phosphoglycerate kinase 1	142328	103250	116300	93921.4	109243	94024	102931	121472	149170	80974.7	110927	121379	94300.5	144393	126237	114882
YSLEPVAAELK	O35476	Phosphoglycerate kinase 1	902678	379063	676716	213633	353588	390070	615590	688571	743169	280766	643031	712667	583513	848788	1.0488e+06	861652
ITLPVDFVTADKFDENAK	O35567	Phosphoglycerate kinase 1	134093	96994.4	100175	59874.7	98989.7	126254	73691.9	110062	93617.3	63136.5	96565.5	125843	75297.6	79363.8	141012	102320
ALESPERPFLAILGGAK	O35567	Phosphoglycerate kinase 1	64723.9	46726.2	44625.6	34519.8	52594.8	34534.2	68066.1	50038.5	75936.6	32543.1	69061.8	48331.4	53558	82407.7	57551.1	69139.9
VLNNMEIGTSLYDEEGAK	O35567	Phosphoglycerate kinase 1	19523.7	20043.9	38871.5	19098.6	33189.3	34887.3	14070.6	35456.7	24157.3	14458.6	49187	35999.3	18186.6	45167.2	38812.8	34331.4
VDFNVPMK	O35567	Phosphoglycerate kinase 1	88315.2	75681.6	93658.8	80219.4	102877	98370.4	45127.6	90797.7	73489	41297	252301	91049.2	73031.3	238365	133725	71715.5
TGQATVASGIPAGWMGLDCGTESSK	O35567	Phosphoglycerate kinase 1	11234.2	12272.1	17561.5	9565.74	14442.7	19575.8	8309.99	18451.8	9175.79	4157.4	12694	12390.3	6111.11	13820.6	9916.6	8666.72
VNEMIIGGGMAFTFLK	O35567	Phosphoglycerate kinase 1	19140.5	9968.3	9240.7	4594.55	19785.5	17322	12236.6	20511	21680.5	3969.58	21059.4	20807.1	12297.7	28113.8	36216.6	19283.1
EAGVFVPR	O35567	ATP-citrate synthase	96505	72680.2	80348.1	62202.7	84737.2	85312.4	72844.3	74957	82145.9	61503.6	79064.5	93357.9	72497.8	91246.2	94670	79785.6
LLVGVDEK	O35567	ATP-citrate synthase	87488.4	73797.5	80079.1	71199.3	82671.5	90530.9	91993	72079.5	75240.1	61553.1	81085.4	103520	65140.2	86920.1	92118.7	73956.6
VDATADYICK	O35567	ATP-citrate synthase	18861.4	19972.1	19111.8	18542.9	19327.9	17755	16977.9	16804.5	18692.1	19196.9	16257.4	20180.5	16740.8	18844.8	22080.5	20517.4
LTLLNPK	O35567	ATP-citrate synthase	55457.7	43292.6	51195.4	42597.2	53043.3	59287.4	51968	42931.5	48079	44736.3	58692.8	64669.6	48307.5	58667	63730.8	53735
TIAIIAEGIPEALTR	O35567	ATP-citrate synthase	70341.1	16354.7	24397.7	8045.36	28447.8	35145.5	19710.9	29803.9	32041.8	13917.8	34032.6	54457.6	20631.8	35630.4	60303.6	27536.5
EHEVTIFVR	O35567	ATP-citrate synthase	9266.2	8008.45	9305.29	8375.85	7246.21	7680.25	9458.66	8173.55	8439.75	7435.87	7821.74	9006.27	8679.21	8279.05	N/A	6875.87
DLVSSLTSGLLTIGDR	O35567	ATP-citrate synthase	5251.87	982.457	1850.56	750.615	5126.17	6995.39	1491.29	6434.86	5299.84	1107.11	5511.02	2240.18	1406.45	5837.35	14233.9	2900.44
TTDGVYEGVAIGGDR	O35763	ATP-citrate synthase	35640.1	19768.2	34870.9	15927.8	32677.5	19033.7	27908.4	35866.8	26302.2	16546.4	20738.7	19872.2	31119.2	35949.4	38570.9	18669.1
EAYPEEAYIADLDAK	O35763	ATP-citrate synthase	16751.3	4650.81	5953.52	3355.59	12975.6	11366.3	4577.76	12884	12278.5	4376.32	11167.5	12970.1	5239.61	15717.8	24690.2	15702.5
YICTTSAIQNR	O35814	ATP-citrate synthase	23734.5	19436.7	24404.3	8988.54	26487.8	13115.5	11578.9	24083.9	30564.3	20030.4	24611.1	23941.4	20211.9	27735.2	30994.4	24816
GQELIYAGMPITEVFK	O35814	ATP-citrate synthase	5629.75	3714.66	3377.71	2156.69	7272.56	4012.93	2573.55	8552.61	9210.41	2662.67	10541.9	3666.43	3945.69	12046.5	16324.6	3914.68
DGVYILDLAAK	O35814	ATP-citrate synthase	22030.4	13027.8	14598.2	6589.31	18165.8	23474.6	10981.3	14908.3	26378.6	10108.7	18952.9	17710	12290.6	17504.6	37596.1	17787.8
EILIPVFK	O35814	ATP-citrate synthase	38853.9	18432.8	23720	8575.56	32636.4	43209.8	17102.9	23394.5	28612.3	11866.9	33057	36365.7	16917	35585	63963.6	29139.5
LYRPGSVAYVSR	O35814	ATP-citrate synthase	12120.6	6327.14	12112.8	11429.6	11947.1	13946.6	15226	8734.28	13032	9520.53	12684.1	7598.04	12080	15024.3	13654.4	14763.6
LGLVGVNLSLDGVK	O35814	ATP-citrate synthase	13755.7	9773.32	12758.7	7950.87	20364.3	15810	9967.46	9890.37	13211.4	10126.4	19796.3	10712.6	6986.15	18886.4	15654.3	14742
TILSLMTR	O35814	ATP-citrate synthase	16618.4	6798.27	8696	17491.8	20872.4	17340.9	11319.1	5888.82	11187.9	5555.83	21994.3	5518.38	5635.77	27021.6	9322.33	15253.1
WGDIEFPPPFGR	O35814	ATP-citrate synthase	8814.07	2171.08	9002.98	2578.24	5341.53	5619.64	3752.49	1102.29	11106.6	3381.92	N/A	6219.36	7272.65	9952.44	N/A	6245.7
AFDSGIIPMEFVNK	O35821	ATP-citrate synthase	7339.55	5250.51	13308.9	3543.33	22533.2	20123.4	9027.82	16079.7	7069.53	4019.49	24476.3	20841.3	5728.72	20291.5	30105.6	16951.6
GVTIIGPATVGGIKPGCFK	O35821	ATP-citrate synthase	3335.74	3299.3	6512.38	5883.3	6700.69	4223.95	8079.93	3798.26	9237.46	6100.41	6386.23	4205.11	7998.46	5961.95	4119.85	8507.03
SGGMSNELNNIISR	O35821	ATP-citrate synthase	4988.42	7240.71	8313.01	5933.59	6954.01	7005.25	4641.12	7433.73	2900.36	5660.86	8527.56	6314.46	6026.68	11362.6	9751.29	7104.19
IGNTGGMLDNILASK	O35821	ATP-citrate synthase	1880.26	2359.91	4713.18	2640.36	3817.13	3366.06	1665.96	3711.46	1573.48	2830.68	4322.34	2961.8	2438.83	5720.61	5294.64	3192.51
MIVVLGEIGGTEEYK	O35821	ATP-citrate synthase	10680.7	7971.73	9979.17	6605.8	9848.43	4799.78	9116.23	11310.1	7442.78	6363.59	14805.3	7588.54	6268.92	8333.33	N/A	6381.99
VLQALEGLK	O35824	40S ribosomal protein S19	6138.88	6798.67	5460.77	5409.39	5345.61	4478.43	6200.77	6570.19	6427.47	5759.9	5482.53	6992.61	5085.57	8649.25	6814.5	5759.8
ALAAFLK	O35824	40S ribosomal protein S19	8150.84	5918.08	5533.09	4617.71	6435.97	6235.79	7182.6	7401.86	7983.2	4040.01	7183.23	6660.22	5107.78	7260.04	8899.76	6568.73
FLDGIYVSEK	O35987	60S ribosomal protein L9	5459.16	5503.07	5427.01	4267.08	5878.78	4195.5	5203.81	5451.16	6993.62	4175.85	5556.96	7900.15	4923.54	4771.95	5691.29	4924.61
VLTVINQTQK	O35987	60S ribosomal protein L35	7680.23	7177.65	7003.47	5643.63	6416.4	5153.58	6008.29	7902.47	5817.06	4536.82	7373.85	7994.74	6478.79	7222.39	5927.74	5347.83
GYSFSLTTFSPSGK	O35987	Proteasome subunit alpha type-2	1051.14	2521.82	2936.71	1985.61	2966.69	2724.01	2955.26	3052.63	4100.7	2338.34	4476.6	1537.91	2976.08	2686.91	2797.35	3199.25
LAQQYYLVYQEPIPTAQLVQR	O54975	Proteasome subunit alpha type-2	4882.07	2567.29	4537.41	1370.37	4467.78	5635.19	4288.7	4709.31	7414.03	2621.18	5449.58	3202.34	3799.92	5972.35	11491.7	5036.31
DYLAAIA	O54975	Proteasome subunit alpha type-2	5743.39	4480.21	2397.15	1859.88	3176.84	3388.31	2650.88	3853.52	2976.92	2271.35	4378.57	3744.21	2289.52	3043.73	3134.63	4303.59
ITASLCDLK	O54975	Hydroxymethylglutaryl-CoA synthase, cytoplasmic	2814.83	N/A	3980.31	3745.44	5759.48	4538.78	4265.85	N/A	4432.62	8713.5	5126.13	N/A	3784	4345.3	3414.35	3776.2
YTIGLGQAR	O54975	Hydroxymethylglutaryl-CoA synthase, cytoplasmic	N/A	4950.33	3825.43	3631.8	N/A	4006.96	5092.29	3562.24	4252.62	5161.54	N/A	4025.26	3755.42	3215.22	N/A	4997.69
ICYDALDPAK	O54975	Peripherin-2	197425	196152	196263	155320	165566	211399	126593	188360	292179	153090	207783	207154	144884	183418	222743	200508
YLDFSSK	O55096	Peripherin-2	198684	258890	26520	17958	29984.8	55689.9	36453.1	50019.8	239722	32504.2	40291	48536.7	24406.4	48810.4	44239.4	40830.7
SNQVEAEAADAGQAPEAG	O55096	Peripherin-2	125716	128136	126043	96064.6	124282	147404	71756.3	116538	119593	76193.8	133783	147521	109607	136576	169711	145622
AFLESFK	O55096	Peripherin-2	255117	250331	239526	163345	423372	281230	165133	266690	214822	140743	283139	311178	191317	251612	277027	283109
GSLESTLAYGLK	O70196	Peripherin-2	171247	82212.7	154159	46452.6	145807	190597	110505	149249	229110	107771	139912	149441	123181	206984	296121	208193
AFLESFKK	O70351	Peripherin-2	6656.05	4530.77	5281.15	4856.97	6118.29	4589.48	2372.93	5037.24	N/A	2798.63	3680.47	4272.79	4710.51	3348.31	4909.8	9656.06
TIDMLQIEFK	O70351	Peripherin-2	20037.5	9821.96	20326.5	12423.1	24671.6	18143.8	15976.4	25245.7	21018.3	10430	45117	33793.1	13113.9	25377.2	18041.3	16908.4
AVLTLDER	O70351	Alpha-1-antiproteinase	11849.1	12785.8	9068.27	7799.19	9522.66	11419.6	10494.8	6965	10926.9	7903.71	8276.66	12022.8	12797.7	6812.78	14116.2	13975.1
NCSSFLIK	O70511	60S ribosomal protein L28	2441.6	3397.98	2854.94	2819.47	2768.64	N/A	2224.35	2566.61	3121.87	2368.02	2623.97	3292.14	2217.54	1824.4	2560.19	2577.15
LEDLIVK	O70511	Acetyl-CoA acetyltransferase, mitochondrial	9704.04	8014.8	7500.59	5790.17	7740.19	7649.71	7103.18	6216.11	5586.63	5532.61	8194.1	8240.44	5853.86	8923.27	8476.65	5836.77
TPIGSFLGSLASQPATK	O70511	Acetyl-CoA acetyltransferase, mitochondrial	1803.66	1753.32	2647.85	1167.35	2990.85	2922.83	2495.85	1486.07	N/A	1444.52	2629.57	3036.88	1878.9	4422.31	7454.31	2758.26
LGTIAIQGAIEK	O70617	Acetyl-CoA acetyltransferase, mitochondrial	8373.94	7677.12	9280	6478.69	7301.58	7698.42	7547.67	8710.88	7786.65	6389	7339.26	8608.42	6584.58	9894.36	8500.87	8051.33
FANEITPITISVK	O88339	Acetyl-CoA acetyltransferase, mitochondrial	6693.96	4822.32	5686.76	2929.73	5952.89	6194.79	5085.47	5473.59	5343.86	3451.69	6519.31	4341.41	4535.49	5838.99	10341.8	5440.29
IAAFADAAVDPIDFPLAPAYAVPK	O88600	Acetyl-CoA acetyltransferase, mitochondrial	2119.82	600.629	1572.76	290.845	2248.37	N/A	1840.84	1069	N/A	676.362	1376.56	1255.31	1123.62	1246.52	3238.98	1263.25
GTVGFENQINK	O88600	Glutamate decarboxylase 1	4603.28	5294.27	4775.36	4417.12	6118.82	5160.25	4210.76	5490.74	4356.36	4221.98	4258.01	5904.63	4586.51	4966.9	5347.87	6565.49
NLLSCENSDPGAR	O88600	Glutamate decarboxylase 1	3589.13	3003.32	2640.1	2180.2	3724.11	2806.29	2957.23	3140.4	4368.15	3036.15	2110.5	3087.39	2879.51	3188.28	5477.63	3315.51
IIPADLEAK	O88600	Glutamate decarboxylase 1	13302.3	N/A	14387.5	11731.7	12010	12825.8	11537.6	7227.84	N/A	10896.9	10584.3	11995.9	8673.28	9881.41	8027.02	10330
LLLEGVENK	O88600	Long-chain-fatty-acid--CoA ligase 1	11742	8981.29	11748.8	8471.17	10210.2	10760.8	10747.7	8616.99	9929.53	13635.4	9832.62	12143.2	7586.94	12033.8	10063.1	9659.29
GIQVSNDGPCLGSR	O88600	Long-chain-fatty-acid--CoA ligase 1	3917.88	4139.72	4189.98	3590.01	2861.22	4148.05	3210.16	4371.6	3153.35	4200.77	3951.77	5385.3	3986.1	4138.52	4738.54	4299.83
GFQGSFEELCR	O88600	Long-chain-fatty-acid--CoA ligase 1	4163.39	3971.94	3913.69	2901.86	3731.83	3456.02	3669.99	3667.21	3247.11	3179.78	3489.93	3815.39	3511.56	2630.83	3859.57	4050.07
SQIDELYSTIK	O88600	Long-chain-fatty-acid--CoA ligase 1	6764.08	4497.79	5290.47	3407.8	5031.55	5891.19	5366.98	4782.01	N/A	4370.04	5552.58	4682.58	4428.93	5317.74	7276.75	5699.38
VLQPTIFPVVPR	O88600	Long-chain-fatty-acid--CoA ligase 1	18016.6	11341.1	10502.8	4507.26	14588.1	14529.8	8585.44	10346.6	15640.3	8802.93	11572.7	10297.2	7632.11	12076	20852.6	13013
MEVHELFR	O88600	Long-chain-fatty-acid--CoA ligase 1	5925.45	5921.98	8039	5636.74	7536.23	8122.88	6115.92	7234.06	6246.59	5457.7	7460.59	7315.93	4715.49	9187.24	8235.28	6340.64
SQEVAYTDIK	O88600	Glycogen synthase kinase-3 alpha	1164.52	1653.13	960.679	1449.15	1515.65	N/A	1679.54	2015.5	2674.9	1674.05	1686.61	1134.71	1325.05	1796.42	1528.23	1162.36
VTTVVATLGQGPER	O88600	Glycogen synthase kinase-3 alpha	4347.06	2357.84	3592.64	2428.68	3025.54	4181.92	2767.85	3868.4	2583.34	2599.65	3275.3	2412.64	3717.42	2803.28	2463.33	4473.3
DIKPQNLLVDPDTAVLK	O88600	Glycogen synthase kinase-3 alpha	N/A	615.755	396.959	363.846	401.083	N/A	325.471	551.998	319.575	380.541	557.956	528.396	710.857	745.269	N/A	757.234
TPPEAIALCSR	O88600	Glycogen synthase kinase-3 beta	3372.4	3865.32	N/A	3224.85	3325.87	2824.47	3059.76	N/A	3567.38	3798.86	2738.18	3994.69	3014.84	N/A	2990.91	N/A
DIKPQNLLLDPDTAVLK	O88600	Glycogen synthase kinase-3 beta	2044.94	1973.15	2336.35	905.571	2518.12	2202.96	1866.26	1522.18	1799.7	1415.48	1635.74	2233.51	1853.47	1662.02	4471.69	2074.01
GAVIPIR	O88600	S-adenosylmethionine synthase isoform type-2	18988.7	12100.4	14585.7	10622.7	15571.7	17671.8	13703.7	13415	16305.9	9709.82	13877.7	15743.2	12142.7	17464.6	16345.1	16509.5
FVIGGPQGDAGLTGR	O88600	S-adenosylmethionine synthase isoform type-2	7613.15	7890.03	5561.47	4349.82	6653.77	5880.96	5854.09	5491.03	8344.27	4681.03	5551	6158.92	5464.88	4014.48	6133.24	7203.58
ELLEIVK	O88600	S-adenosylmethionine synthase isoform type-2	3294.28	3374.84	2550.07	2745.42	4506.22	2942.48	3321.02	3091.14	N/A	2324.56	3583.99	1930.4	2915.87	3865.38	2999.8	4188.17
NITLDDASAPR	O88761	Cold shock domain-containing protein E1	6049.39	5964.92	5482.98	5098.08	6551.93	6506.29	6856.04	6389.27	5871.75	6394.24	5653.67	7086.81	6325.09	7059.1	8258.21	7574.07
INFVIDNNK	O88761	Cold shock domain-containing protein E1	1353.52	1401.75	2423.15	2083.55	2949.14	2130.41	1797.59	1899.77	831.669	1891.91	2708.39	1384.67	2166.21	1880.15	1516.02	1641.86
FYALSAR	O88761	Calreticulin	152937	120132	115025	91880.9	112741	125568	115725	105649	126290	92443.5	110934	112236	101636	131939	134344	126586
LFPGGLDQK	O88761	Calreticulin	105816	75877.8	87767.1	62235	79997	88773.7	74421.6	76013.2	89045.6	61711.3	87216	98815.7	65360.4	92088	81073.2	77506.6
GQTLVVQFTVK	O88761	Calreticulin	10917.7	7998.23	8776.79	11455.4	11071.5	6884.2	12188.4	6520.83	14636.2	10308.8	5859.23	4717.63	7947.58	11514	1991.71	11884.3
EQFLDGDAWTNR	O88761	Calreticulin	18701.1	9556.74	14879.3	8815.55	8403.16	13192.2	13179.4	14628.9	21097.9	10643.1	4735.25	10192.9	16353.1	11140.2	13217.3	13532.8
VHVIFNYK	O88761	Calreticulin	11155.6	7222.51	8683.67	6555.89	5285.31	5703.9	7775.48	6465.04	8779.45	9731.96	6579.16	3114.21	7398.71	7593.81	3919.22	9086.63
IKDPDAAKPEDWDER	O88761	Calreticulin	3429.44	1534.6	1570.86	1793.63	N/A	2187.37	2047.96	2350.94	5136.82	1403.57	1552.81	2735.59	1966.89	1778.21	1388.21	1893
DMHGDSEYNIMFGPDICGPGTK	O88767	Calreticulin	6845.35	4857.33	9712.99	5742.55	6721.62	6797.26	4047.73	8990.4	2534.93	5375.8	14541.6	8258.21	7637.69	12848.4	6419.86	7323.05
ETLPAEQDLTTK	O88767	Proteasome subunit alpha type-1	16763.8	20148.9	16412.5	13154.5	17943.2	17884.1	14358.8	22485.1	17889.1	14056.7	19244.7	20405.6	13861.2	23360.7	20656.2	19167.5
NVSIGIVGK	O88767	Proteasome subunit alpha type-1	13428.2	10820.4	13279.5	9419.82	12022	13471.8	11425.9	12921.9	11513.5	11036.5	14855.3	12978.1	10944.6	17179.3	11766.1	11858.6
LVSLIGSK	O88767	Proteasome subunit alpha type-1	20815.1	14459.2	15289.4	13538.2	17155.1	16845.7	17530.4	16171.7	20818.3	12297.1	16146	21114	12622.1	20836	17908	15817.3
DVFISAAER	O88984	Proteasome subunit beta type-1	12592.6	11989.2	11172.1	8956.58	10705.6	9718.2	12031.8	11690.9	13768.2	10952.4	11497.2	12660.8	10439.5	10402.7	12098	11350.5
GAVYSFDPVGSYQR	O88989	Proteasome subunit beta type-1	11721.3	10041.5	8342.02	6240.42	10601.3	8503.77	8819.85	10957	10628	7154.86	10499.8	8797.44	8824.25	8986.68	12496.6	12593.6
EGIREETVPLR	O88989	Proteasome subunit beta type-1	6300.61	N/A	4401.56	3968.28	4875.39	4050.59	5471.23	4773.6	5450.2	3018.26	4349.12	6756.99	3322.63	N/A	5573.97	4205.47
NMQNVEHVPLTLDR	O88989	Proteasome subunit beta type-1	N/A	4057.71	6053.85	4904.65	1130.08	5490.97	3903.62	7083.27	N/A	3548.13	5685.61	4838.73	4885.98	7732.21	N/A	4534.89
AVENSSTAIGIR	O88989	Proteasome subunit alpha type-3	6684.65	6434.7	5529.48	3701.38	5367.22	5866.77	5468.9	5846.88	4674.25	4663.94	5046.25	5504.51	4412.32	5913.79	5715.92	5937.46
DGVVFGVEK	O88989	Proteasome subunit alpha type-3	6460.46	6452.24	5307.55	4627.95	5021.78	5416.31	5458.78	4795.67	5656.49	5562.74	6219.64	7763.6	4869.55	6263.71	6327.35	4985.63
SNFGYNIPLK	O88989	Proteasome subunit alpha type-3	9496.82	10377.9	8230.32	5835.97	8322.74	8961.75	7546.94	8177.73	8877.86	7122.97	8205.72	8911.76	7604.62	11157.3	10805.1	9978.22
NQSFCPTVNLDK	O89049	60S ribosomal protein L27a	7027.18	7953.2	6009.25	5371.82	6106.57	5291.09	4666.66	6660.45	7152	5130.52	7513.07	6756	5761.94	5320.74	5628.64	6044.55
NGVAPIIDVVR	O89049	60S ribosomal protein L27a	2836.49	2256.93	1156.21	1204.22	N/A	1812.44	N/A	2141.48	1814.15	1188.8	2307.89	1626.9	1772.27	1609.34	2222.06	N/A
ATIQDVLR	O89049	AP-2 complex subunit alpha-2	78367	62567.5	66277.2	50451.8	74583.9	81019.7	72012.9	60647.8	68513	57971.8	64518.5	78958	60085.5	88492.7	84950.9	69776
VIQIVINR	P00388	AP-2 complex subunit alpha-2	50736.2	27879.1	50546.1	40123.9	43604.2	46489.8	55440.7	31958.6	55115.7	35653.5	49542.7	36348.6	40839.5	57450.5	34916	42544.8
YGGTFQNVSVK	P00388	AP-2 complex subunit alpha-2	36400.4	34060.2	33785.3	29918.9	36209.4	32990.1	33148.2	33578.4	36122.2	33036.9	35952.7	36070.9	32523.3	37820.3	42690.4	37386.6
QSAALCLLR	P00388	AP-2 complex subunit alpha-2	40591.8	27705.4	32929	25559	35085.5	30079.4	30452.1	33567.3	33750.2	30389.4	25733.7	35359.6	32984.5	45505.4	46964	33559.8
TTQIGCLLR	P00507	AP-2 complex subunit alpha-2	32970.6	29397	29661.4	26274	29060.1	35042.7	26547.7	33306.1	38599	27413.3	24570	36603.4	28099.5	37676.3	35480.2	31056.8
ALLLSTYIK	P00507	AP-2 complex subunit alpha-2	27754.7	18068.1	27698.1	18223.6	29961.9	25996.4	25546.1	18196.1	34762	17830.9	30949.2	14692.7	18869.8	33102.7	37612.9	28795.6
LPITLNK	P00507	AP-2 complex subunit alpha-2	28014.2	26277.9	27780.4	27548.4	32156.8	36371.3	31739.6	24299	25855	26959.9	33859.8	33887	27282	27183.8	31547.5	28113
THIETVINALK	P00507	AP-2 complex subunit alpha-2	8038.53	6077.71	9552.4	7801.16	7038.21	7508.48	9531.64	8222.74	8989.45	8046.92	7606.6	5961.12	9354.94	12882.4	8112.55	8757.56
FHLCSVPTR	P00507	AP-2 complex subunit alpha-2	6797.66	5191.53	6181.54	6530.56	6447.15	5649.61	6741.42	5638.81	8362.17	6497.35	5787.42	6188.04	7107.61	8087.14	6575.46	8825.72
GPSTVTDLEETKR	P00507	AP-2 complex subunit alpha-2	1116.11	2189.38	2209.53	1854.64	2822.63	4250.41	1979.29	1841.02	1933.84	2114.9	2401.71	2533.68	2327.34	2453.69	2424.93	1689.53
VGGYILGEFGNLIAGDPR	P00507	AP-2 complex subunit alpha-2	5638.78	2384.72	2468.64	1472.05	3760.67	3142.58	2519.72	2879.38	4178.1	2310.37	3195.6	2508.12	3089.97	3977.24	N/A	2670.29
LCELLSEQF	P00507	AP-2 complex subunit alpha-2	1808.57	N/A	1706.03	1183.76	2398.79	3139.58	1792.82	1478.28	N/A	2059.44	2036.36	1974.04	2012.04	1331.79	N/A	1362.09
ACNQLGQFLQHR	P00507	AP-2 complex subunit alpha-2	12528.8	5884.38	8378.01	8761.93	15153.4	15675.6	9834.88	11934.3	17027	8704.17	16054.3	11761.4	9000.43	16748.9	14334.4	14338.5
LLQCYPPPDPAVR	P00507	AP-2 complex subunit alpha-2	32216.5	24291.8	22632	9821.12	22894.3	11475.5	24612	25052.1	28413.2	11293.8	11150.2	26318.6	23352	26238.6	31047.6	30114.6
ILVAGDTMDSVK	P00507	AP-2 complex subunit alpha-2	11391	22425.7	29981.7	25702.3	30351.6	29740.4	15279	26567.1	15277.2	10416.3	36177.3	25725.8	19607.7	36880.7	23900.8	20748.4
TVFEALQAPACHENLVK	P00507	AP-2 complex subunit alpha-2	13165.6	12694.1	13987	5778.69	12374.4	13454.7	14765.4	13965.2	14890.7	5791.23	11132.9	18228.6	12655.2	15267.8	14689.5	13714.4
FVNLFPEVK	P01026	AP-2 complex subunit alpha-2	41286.7	33476.6	33633.4	18802.9	39419	44322.4	32661.7	37495.9	40366.8	24257.1	44369.4	39752.6	26608.2	43053.7	63564.6	39191.7
GLAVFISDIR	P01026	AP-2 complex subunit alpha-2	31674.1	18821.6	19253.8	10727	28682.5	25488.4	18528.2	25101.9	30262.7	13811.9	29919.3	23692.3	15296.6	30598.1	11735.3	23979
LTECLETILNK	P01026	AP-2 complex subunit alpha-2	17910.7	15457.1	14447.5	11154.6	14750.3	17825	16739.8	16411	13365.7	12314.1	15190.6	20220.8	15068	22391.7	25435	16365.7
MFIFYGNK	P01026	AP-2 complex subunit alpha-2	8757.42	7864.21	11189.5	10144.5	12122.1	10792	7882.4	11408.8	6447.35	8052.57	18172.9	6570.7	7663.48	15479.1	6082.06	7409.94
QLSNPQQEVQNIFK	P01026	AP-2 complex subunit alpha-2	8239.28	4854.52	4491.7	3134.34	4615.47	5082.62	4704.42	5369.96	5981.96	3358.66	3690.21	4595.59	4489.66	6447.77	8412.33	4685.29
EMAEAFAGEIPK	P01026	AP-2 complex subunit alpha-2	9188.72	11159.2	18277.1	12956.7	18076.5	16166.7	6632.08	16140.5	7573.91	6129.83	22484.7	14444.3	6639.55	21214.7	12822.8	10958.2
IAGDYVSEEVWYR	P01026	AP-2 complex subunit alpha-2	N/A	3033.07	3176.92	2802.34	N/A	3044.12	3165.28	3896.37	4729.74	1986.36	N/A	3623.03	4162.7	1325.07	N/A	1862.43
LSTVASTDILATVLEEMPPFPER	P01026	AP-2 complex subunit alpha-2	2695.97	867.28	2313.89	682.663	3546.56	N/A	3298.15	2570.99	2964.36	808.62	4609.31	2553.5	929.076	6128.78	N/A	2047.03
VGLIALK	P01946	39S ribosomal protein L3, mitochondrial	133.778	299.154	136.587	228.877	205.534	258.453	335.337	287.786	298.864	236.657	223.878	155.621	287.05	309.454	250.88	249.188
ATNLTVSAVR	P01946	Carnitine O-palmitoyltransferase 2, mitochondrial	6971.34	4856.07	6976.16	5962.21	6796.78	7517.29	6783.72	6264.75	5640.25	5716.7	7145.85	6768.89	6517.6	7595.74	6053.04	8455.96
LIFDGNEETLK	P01946	Carnitine O-palmitoyltransferase 2, mitochondrial	7278.78	5990.61	6953.89	4638.01	7948.88	7257.69	6726.04	6688.72	6903.49	4848.92	7343.61	7926.33	5652.47	7225.37	8051.28	7908.04
YILSDSSPVPEFPVAYLTSENR	P01946	Carnitine O-palmitoyltransferase 2, mitochondrial	993.968	784.787	1897.98	434.861	2671.89	4447.98	1294.03	1405	1084.02	855.406	2914.85	1375.73	1805.5	2536.82	3558.16	2181
TLSIDSIQFQR	P01946	Carnitine O-palmitoyltransferase 2, mitochondrial	10203	7639.01	6930.6	5126.58	7648.3	7903.86	8928.09	9056.55	7207.27	6657.67	5797.86	7578.88	5883.31	12038.5	N/A	8983.2
IFLQDIK	P02091	Ferritin heavy chain	1179.9	2008	1327.42	1147.08	1028.95	N/A	1475.11	3290.52	948.233	2140.64	1631.23	N/A	917.748	1177.12	2379.08	N/A
GGPNIITLADIVK	P02523	Casein kinase II subunit alpha	34675.9	14539.9	23429.7	6977.85	26714.3	42629	13686	21877.2	38754.1	10082	29330.9	20363.6	17578.5	47405.1	94521.4	31362.8
FNDILGR	P02523	Casein kinase II subunit alpha	8505.43	6687.52	6697.37	5940.56	7710.63	7631.87	6687.16	6344.65	7654.32	5433.09	8660.42	8322.03	6271.64	5885.14	7109.23	7792.86
VLGTEDLYDYIDK	P02523	Casein kinase II subunit alpha	2613.4	2166.99	2050.78	1278.79	1784.86	4121.53	2088.53	2157.54	3016.8	1682.58	2213.89	2824.13	1288.87	2417.88	4451.25	2332.83
QLYQTLTDYDIR	P02523	Casein kinase II subunit alpha	1107.34	1717.12	891.294	1058.89	N/A	1050.46	1241.09	696.627	1348.59	1336.34	907.858	N/A	1230.89	1690.17	N/A	1684.18
AAAVLPVLDLAQR	P02523	NADH dehydrogenase [ubiquinone] flavoprotein 2, mitochondrial	7000.79	4102.88	3499.63	1716.26	3869.69	7032.74	2533.71	4518.47	6090	2360.4	4419.79	4966.03	3138.63	7313.51	11150.3	4289.99
TPSLPTPPTR	P02524	Microtubule-associated protein tau	52692.3	41335.6	53441.5	31986.1	50493.2	47335.3	50341.7	40593	38629.9	38803	33043.4	39648.7	44133.1	35779.3	60475.2	39781.4
IGSLDNITHVPGGGNK	P02524	Microtubule-associated protein tau	5987.25	6015.99	9812.81	5783.31	7546.76	6578.01	8733.73	5713.13	4706.24	3570.94	4488.29	5720.01	6182.38	5609.16	9113.17	3991.72
SLFFPDEAINK	P02524	Glutamate--cysteine ligase catalytic subunit	4892.19	4540.6	4834.45	3085.18	6113.91	4168.43	5050.48	N/A	6033.96	5708.16	6397.55	5544.3	4340.42	5328.62	N/A	4777.66
ADIAIAPLTITLVR	P02650	Glutamate receptor 2	1950.65	874.15	1589.11	670.397	2125.09	1879.99	1376.96	1098.79	1184.06	916.128	3119.75	N/A	1085.76	2247.63	N/A	1500.56
ADIAVAPLTITLVR	P02770	Glutamate receptor 3	N/A	757.52	1112.86	577.503	2024.24	N/A	1127.16	1281.25	N/A	944.016	1770.75	1107.19	641.576	1061.53	N/A	1231.9
IAQLEEIK	P02770	ATP synthase F(0) complex subunit B1, mitochondrial	56968.6	48711.5	57968.6	52580.2	55098.8	57882.4	55684.9	62604.8	56417.1	45262.3	53014.1	74889.2	40773.6	59186.7	59538	55195.2
YGASIGEFIDK	P02770	ATP synthase F(0) complex subunit B1, mitochondrial	21284.5	20857.9	16999.7	13451.3	16772.8	21521.2	19210.6	20219.7	25006.9	15933.1	21050.6	23155.1	16967.9	21167.7	25355.4	20907.6
HYLFDVQR	P02770	ATP synthase F(0) complex subunit B1, mitochondrial	19291.2	18102.7	17361.9	13188.5	16395.1	16117.2	18515.9	17461.6	24111.5	16068.4	14376.9	18883.9	16631.2	38649.3	12949.5	20727.8
HVIQSISAQQEK	P02770	ATP synthase F(0) complex subunit B1, mitochondrial	7084.78	5269.53	6208.81	3141.71	4400.47	6191.93	5210.24	6697.27	12187.7	4207.77	5087.84	6993.22	4795.05	7523.34	7927.34	6783.04
LDYHISVQDMMR	P02770	ATP synthase F(0) complex subunit B1, mitochondrial	1044.92	1024.81	3632.69	1890.71	1685.42	1213.57	1956.8	2763.48	N/A	1079.07	4923.73	N/A	2261.69	3240.65	1718.32	1572.51
FTVLTESAAK	P02770	Neurofilament light polypeptide	8468.3	11599.3	14520.4	10758.3	19633.6	9228.95	6115.7	6998.22	12355.6	14340.5	10408.4	13266.3	7513.27	13407.3	10849.1	6883.47
FASFIER	P02770	Neurofilament light polypeptide	6466.54	8611.11	9865.18	7795.18	17105.4	7296.19	4636.45	4874.68	8632.99	9516.48	6825.55	9230.52	4912.03	8819.73	N/A	4286.59
LLLLGTSNSGK	P02770	Guanine nucleotide-binding protein G(z) subunit alpha	21857.5	18632.4	22044.2	15383.1	22133.3	24003.9	20930.3	19073.9	19299.8	16239.5	22883.4	19134.3	15761.1	22393.8	22245	21231.2
IAAPDYIPTVEDILR	P02770	Guanine nucleotide-binding protein G(z) subunit alpha	5959.12	2776.97	4153.12	1126.62	5364.08	6659.54	2768.03	3502.83	8865.02	2122.11	13174.9	8914.89	2775.04	8172.24	32963.2	5296.24
GQNTYEEAAVYIQR	P02770	Guanine nucleotide-binding protein G(z) subunit alpha	1846.76	1473.6	1763.56	1664.43	1316.47	1029.33	1768.36	1421.03	3357.9	1457.06	1816.52	1303.28	1466.63	1646.28	N/A	2054.43
AYDAVQLFALTGPAESK	P02770	Guanine nucleotide-binding protein G(z) subunit alpha	3292.1	1897.46	2142.11	371.262	1881.58	1904.09	1236.11	2337.53	4150.14	1178.5	2304.17	1730.43	1663.86	2478.02	6491.19	2541.69
IIHSGGFNLEACK	P02770	Guanine nucleotide-binding protein G(z) subunit alpha	2198.75	1646.55	1891.28	2563.7	1761.57	1669.82	2226.78	1624.57	3797.21	2289.94	1566.85	1005.24	1967.22	798.465	1284.27	1555.61
GEITPELLGVMR	P02770	Guanine nucleotide-binding protein G(z) subunit alpha	3661.09	5075.93	5630.79	3827.16	6511.04	6588	3152.57	5837.55	3289.61	3602.97	8817.88	4607.41	3863.57	7124.92	6113.16	6245.92
LNLALQR	P02770	Guanylate cyclase soluble subunit alpha-1	7802.86	7217.74	8411.31	5451.95	7873.69	7736.1	6922.56	7361.76	7185.74	6500.25	8053.14	7440.49	5609.99	8053.15	8621.95	7528.53
DVVLIGEQAR	P02770	Guanylate cyclase soluble subunit alpha-1	23647.7	17568.3	18485.9	11618.8	19816.9	19229.6	18042.9	19155.1	19451.2	15450.7	18913.3	19233.9	16329.2	22146.3	20133.4	23133.6
LIFPEFER	P02770	Guanylate cyclase soluble subunit alpha-1	12801.7	6261.59	6986.18	4261.63	8601.73	8022.97	5927.44	6317.69	8904.25	6789.2	8600.72	8387.19	3948.11	7404.71	8209.93	6551.07
DCPGFVFTPR	P02770	Guanylate cyclase soluble subunit alpha-1	5853.56	5183.12	5318.59	3562.09	5682.54	4558.17	3907.78	4107.98	5357.16	4302.78	6050.64	6451.69	4454.11	3898.95	6448.05	6537.89
INVSPTTYR	P02770	Guanylate cyclase soluble subunit alpha-1	3150.16	4426.55	3935.22	3244.01	4071.87	4151.19	4271.1	3421.92	2489.54	4248.82	3751	4164.04	3562.06	3285.23	3579.95	3790.88
TTALLLPGIIK	P02770	Guanylate cyclase soluble subunit alpha-1	2485.92	2140.29	3503.27	1103.46	3352.91	6477.78	2285.35	1464.91	3848.34	2146.41	4555.3	2099.4	2066.28	5107.86	9651.63	2853.27
DLAILQLGNGIR	P02770	Guanylate cyclase soluble subunit alpha-1	3607.66	1792.63	1650.49	477.423	2991.88	3893.16	1803.7	1924.39	2432.92	1404.32	2760.65	1827	1540.34	2673.59	6528.53	2420.1
DFLNSFSTLLK	P02770	Guanylate cyclase soluble subunit alpha-1	2182.24	978.349	2888.18	463.206	3538.28	8362.41	1632.6	1484.28	2166	754.215	4542.47	1286.79	1664.8	2336.3	5285.22	2547.14
FDQQCGELDVYK	P03889	Guanylate cyclase soluble subunit alpha-1	1127.08	1092.56	629.741	1563.24	880.293	N/A	1402.37	985.68	1933.86	1807.81	749.17	674.016	1280.1	N/A	1084.75	1321.78
VETIGDAYCVAGGLHR	P04182	Guanylate cyclase soluble subunit alpha-1	3961.68	4994.42	2396.48	3903.28	3097.26	2699.23	4969.5	2877.95	4978.59	3939.58	3670.06	3543.65	3421.91	1878.28	1755.71	4287.88
DRPFFPGLVK	P04182	Nucleoside diphosphate kinase B	N/A	1789.47	2910.28	2505.3	N/A	2114.86	3218.16	2413.46	4070.84	2144.71	3029.45	2339.54	2805.02	1994.11	808.943	2410.98
GNVGFVFTK	P04182	60S acidic ribosomal protein P0	23847.4	18309.4	20918.2	15791.2	20877	20011.3	17433.4	22285.8	23267.4	16995.2	24515.5	18201.2	18425.4	21400.5	18936.4	18579.9
CFIVGADNVGSK	P04182	60S acidic ribosomal protein P0	15419.4	17430.4	18253	12838.9	17766.5	18286.9	12192.3	16433	14973.8	14569.9	17249.7	17851.2	15194.9	17678.8	19079.4	13592.3
AFLADPSAFAAAAPVAAATTAAPAAAAAPAK	P04256	60S acidic ribosomal protein P0	18511.9	8906.09	9282.83	2537.97	9461.23	25495	6115.4	8712.55	22300.5	3689.46	16105.4	8841.33	6445.38	20721.7	78692.7	19236.1
AGAIAPCEVTVPAQNTGLGPEK	P04256	60S acidic ribosomal protein P0	5972.94	3101.41	8640.42	3034.63	11282.9	8586.55	6583.21	10420	7757.12	6005.34	8328.5	10995.4	7762.59	6423.83	8471.07	7599.17
TSFFQALGITTK	P04636	60S acidic ribosomal protein P0	4592.14	4254.8	5558.92	2406.78	5949.42	6690.27	3612.76	4060.71	3884.02	3205.49	6094.52	3301.55	3890.4	10809.7	8054.89	4301.48
IIQLLDDYPK	P04636	60S acidic ribosomal protein P0	5827.3	5626.63	5534.29	3759.57	5581.53	5825.8	3506.99	5314.72	8164.75	4629.94	6579.4	5020.53	4351.6	6727.56	4978.44	4501.47
GTIEILSDVQLIK	P04636	60S acidic ribosomal protein P0	1060.67	2169.5	1069.93	1423.68	1858.13	N/A	855.413	2093.96	1396.63	1351.49	1157.18	1508.99	838.55	2163.01	N/A	1135.31
DYFISCPGR	P04636	Hemopexin	25828.6	25207.6	21627.8	11775.9	15790.5	18482.7	18542.3	24674.3	13689.8	10652.6	20375.4	23191.1	26433.8	22211.4	19998.5	39397.2
NPVTSVDAAFR	P04636	Hemopexin	20032.6	17194.8	15023.6	8778.13	9425.83	14447	11432.3	14031.3	13339.5	7592.63	11903.6	20705.1	16675.1	14347	11483.5	17441.7
ELGSPPGISLDTIDAAFSCPGSSK	P04636	Hemopexin	9994.91	7495.5	11198.5	2282.77	7650.44	14640.2	5234.98	10779.5	4942.47	2708.59	7235.3	12972.7	9006.2	9339.85	23882.5	13152.5
GPDSVFLIK	P04636	Hemopexin	13396.8	12310.1	10442.8	4857.36	7811.59	9829.22	6687.58	10082.2	8054.52	4094.34	10468.3	11415.9	10513.5	9982.5	7227.82	15420
GGNNLVSGYPK	P04636	Hemopexin	7979.37	5933.33	6552.44	3311.59	3924.29	4950.09	4319.97	6202.97	4522.31	3987.2	5872.8	6686.5	7455.42	5400	5490.57	8236.06
FNPVTGEVPPR	P04636	Hemopexin	26479.1	15511.2	15841.3	6065.19	N/A	6836.09	10803.4	19917.3	7399.54	2000.33	14609.2	15334.5	22689.3	10790.3	9390.07	27860.5
GECQSEGVLFFQGNR	P04636	Hemopexin	8796.42	6085.13	4266.78	1547.3	1779.64	2176.32	3161.93	4913.14	4016.84	1973.56	2837.07	5106.26	5756.95	5714.96	3067.44	7802.23
SSPAITLENPDIK	P04636	NADH-cytochrome b5 reductase 3	10561.6	8853.46	8493.6	7172.01	8704.38	8976.92	8089.93	10291.7	7879.47	7802.42	8254.42	10085.2	7306.12	9192.82	10214.2	8335.89
DLVLLGEQFR	P04636	Guanylate cyclase soluble subunit beta-1	20476.2	13235.6	12265.7	5574.99	13498.1	21267.7	10672	11886	15917.3	8292.37	14571.8	15535.2	10008.6	15318.4	24335	13414.9
TYDLVAAASK	P04636	Guanylate cyclase soluble subunit beta-1	8684.57	9081.6	9844.58	8462.21	9616.19	7763.01	8926.95	7787.11	8388.65	11146.9	9635.86	7954.14	9341.44	9532.69	11618	12305.1
INVSEYTYR	P04642	Guanylate cyclase soluble subunit beta-1	8165.33	8644.68	8148.43	7257.96	7964.3	7471.53	9549	8028.29	8659.16	8878.96	8052.68	6769.64	8520.46	7315.36	9602.74	9492.7
IVNLLNDLYTR	P04642	Guanylate cyclase soluble subunit beta-1	7816.96	4599.76	5653.54	2210.56	6295.38	8882.85	4613.24	5476.12	7143.27	3470.8	6918.42	4139.06	3990.83	9571.64	13951.9	7472.82
VLPQLQPGK	P04642	Guanylate cyclase soluble subunit beta-1	4648.7	5085.56	4166.02	4812.5	5136.87	5197.61	6091.67	3566.66	5535.17	5465.67	4935.67	5271.15	4080.22	3243.83	2891.36	3797.47
ISPYTFCK	P04642	Guanylate cyclase soluble subunit beta-1	4514.33	3270.25	3513.13	3068.18	3788.12	N/A	3834.28	2619.99	4006.76	3004.48	3097.21	N/A	3982.75	2027.87	4298.02	4358.87
YCLFGNTVNLTSR	P04642	Guanylate cyclase soluble subunit beta-1	N/A	1662.96	1896.88	1564.91	2188.9	1270.99	1686.4	N/A	913.376	1623.59	1113.43	N/A	1576.27	2622.73	N/A	2281.79
EGLQDIVIGIIK	P04642	Guanylate cyclase soluble subunit beta-1	6059.09	1963	3353.18	794.049	4673.21	8815.33	2604.1	3112.31	3604.76	1494.69	5981.46	3610.55	2283.75	4493.23	5204.31	3851.22
GLYLSDIPLHDATR	P04642	Guanylate cyclase soluble subunit beta-1	N/A	4435.66	4050.86	2235.9	N/A	3133.38	4387.36	2988.85	5930.78	2299.69	5332.53	3522.02	2112.92	6647.25	3954.73	4196.48
EAQLDEEGQFLVR	P04642	Guanylate cyclase soluble subunit beta-1	4711.94	4087.45	4746.2	3212.4	2637.69	4520.48	4016.73	4994.9	2167.46	3796.35	3095.97	5775.07	3996.37	3640.43	3443.09	5749.98
LTQELEILTDR	P04642	Guanylate cyclase soluble subunit beta-1	2348.33	1700.08	3517.55	2573.1	2281.23	3299.74	3178.47	3014.21	2878.88	2155.61	2077.54	3754.07	2640.51	3196.61	2441.23	2735.42
GPTEQLVSPEPEVHDIER	P04644	Protein phosphatase 1A	N/A	3414.24	3241.36	2353.55	3031.81	3369.91	2221.37	N/A	N/A	2481.87	2938.07	3841.92	2712.23	3438.55	2106.82	3654.02
IINEGAAILR	P04762	Serine/threonine-protein phosphatase 2B catalytic subunit beta isoform	5795.88	5717.83	4651.43	4334.31	N/A	6051.93	6369.79	4421.78	5855.99	4473.81	4901.68	4975.67	4607.11	4511.88	4734.86	5470.95
ILIGSSFPLSGGR	P04764	Protein-arginine deiminase type-2	19277.4	12334.9	16311.9	7891.83	23387.4	20774.9	14077.9	12570.6	14776.3	10623.5	18007	13683.5	10869.1	16081.5	27922	18073.5
DIIDLPALFK	P04764	Protein-arginine deiminase type-2	7220.46	2055.58	7942.2	1357.76	9931.46	26169.1	4216.7	9177.81	11295.5	2045.03	16648	7673.15	5047.83	23126.6	29249.6	9307.54
GFPVVLDSPR	P04764	Protein-arginine deiminase type-2	10377.8	10189.1	8852.93	6557.92	10562.3	11469.8	10318.7	8349.4	13022.9	8113.72	11752.8	11543.1	7357.46	10982.2	10858.2	11722.1
QLLGPDFGYVTR	P04764	Protein-arginine deiminase type-2	3945.39	3223.83	3307.2	2077.08	4170.5	3564.15	3183.18	3343.79	3561.59	2869.06	2802.95	4448.13	2864.4	2502.17	5647.59	4452.38
VGVFYVENPFFGQR	P04764	Protein-arginine deiminase type-2	3334.07	1982.18	2397.7	1017.14	1853.03	2777.55	2500.12	2414.97	5227.33	1665.33	2815.09	1886.35	2069.02	3524.11	N/A	2445.88
WALSPSTTLR	P04764	Protein-arginine deiminase type-2	2362.6	1619.37	5088.09	2393.7	1902.74	N/A	2888.2	N/A	4236.28	4191.25	1878.78	N/A	3630.41	2452.41	N/A	3845.72
FLGEVHCGTNVR	P04764	Protein-arginine deiminase type-2	397.904	1032.48	1315.43	1658.42	1738.61	1497.84	1306.85	984.854	798.811	1010.21	1451.84	2827.49	959.904	1067.08	N/A	805.308
EIDQEAAVEVSQLR	P04764	Cytochrome b-c1 complex subunit Rieske, mitochondrial	8697.79	7247.78	6621.55	5202.39	4159.24	8036.2	6852.97	9497.91	4048.48	5558.85	5942.06	9295.26	6927.42	6545.57	7429.55	8455.22
VPDFSDYR	P04764	Cytochrome b-c1 complex subunit Rieske, mitochondrial	15265.9	14836.7	10267.8	11509.1	12256.6	11940.8	13428	12835	16123	12578.6	13983.8	13289	11188.9	13512.1	13966.1	13715.2
FSSDVLPTLLVYK	P04764	Phosducin	131398	36946.1	45318.9	10985.8	67248.2	129873	51372.5	45407.4	143780	48734.1	75181.2	53142.1	95817.2	76918.1	334828	152543
VTTIVVNIYEDGVR	P04764	Phosducin	17595.7	9024.81	3275.03	4446.31	5547.4	2221.43	5324.79	3959.19	14864	4274.06	1280.17	2538.9	6800.98	1694.87	N/A	10543.5
MEEAASQSLEEDFEGQATHTGPK	P04785	Phosducin	9771.61	6408.12	6569.53	3477.1	17929.7	7233.81	3503.61	4595.96	7377.51	4108.53	11739.7	8425.87	7504.38	2688.75	15194.2	7549.85
EIHDLGQTNTEDEDIE	P04785	Phosducin	11817.1	N/A	N/A	889.148	729.382	1306.67	3405.11	2022.79	8073.28	N/A	388.481	N/A	8083.64	3323.47	9538.28	8723.74
GCDALNSSLECLAAEYPMVK	P04785	Phosducin	9070.23	5046.24	8576.07	3136.34	12833	10070.8	4418.46	4444.76	5425.78	2797.92	5094.92	6453.95	4408.29	3964.45	13314.3	9397.26
GQAGTLAVGAEGGLR	P04785	Alpha-mannosidase 2C1	3202.21	3240.24	3220.06	3425.1	3025.12	3920.19	3321.32	2977.91	3769.3	4134.17	3338.89	4003.62	3659.28	4612.85	4322.72	3603.9
VQLSSPGQLFTALER	P04785	Alpha-mannosidase 2C1	1496.41	N/A	1038.01	600.369	N/A	941.813	1131.75	1450.59	1500.89	614.013	1402.71	653.731	1228.6	1540.89	N/A	969.271
EVLNALGK	P04785	Amine oxidase [flavin-containing] A	8502.23	6109.6	6426.62	5395.69	7154.05	8070.58	6168.89	6060.52	4445.33	5708.95	7099.19	6917.05	6941.03	6297.57	5725.89	5791.78
NLPSVPGLLK	P04797	Amine oxidase [flavin-containing] A	2910.11	2181.07	2116.7	1535.66	2805.79	3224.9	2338.38	2013.53	2352.35	1684.23	1919.57	2701.94	2141.09	3096.91	3042.69	1926.63
YVISAIPPILTAK	P04797	Amine oxidase [flavin-containing] A	14197.3	8258.95	10425.4	4585.27	13920.4	18118	7491.64	7994.5	17054.9	7273.1	14462.6	7672.87	9470.91	14977.7	29567.9	10682
INVLVLEAR	P04797	Amine oxidase [flavin-containing] A	7344.58	4247.04	5797.32	4685.6	7005.61	6796.48	6146.05	6523.75	12408.8	4846.54	6057.14	7730.9	5631.77	7923.64	2507.71	3335.84
VLGSQEALYPVHYEEK	P04797	Amine oxidase [flavin-containing] A	3917.33	3582.48	3565.95	3965.46	4465.83	4347.31	3753.93	4568.56	4846.56	3637.98	4973.32	4563.4	3008.49	4912.22	4151.34	3682.64
LEQQVPVNQVFGQDEMIDVIGVTK	P04797	60S ribosomal protein L3	7457.22	3223.82	4746.82	1970.17	5529.24	3773.66	2876.26	7561.96	4979.37	2400.14	8735.52	9269.91	5599.18	5613.33	12053.1	3496.25
HGSLGFLPR	P04797	60S ribosomal protein L3	7050.84	6371.26	5420.75	6238.69	4648.27	4373.62	6014.71	6768.97	8731.94	8548.21	5419.38	N/A	8787.63	6909.35	N/A	7619.15
IGQGYLIK	P04797	60S ribosomal protein L3	26152.6	24976.7	25254.1	21080.2	25118.1	27849	20494.6	23525.8	29395.1	20723.8	26374	26882.1	20516.6	25331	27076	21704.5
YYPTEDVPR	P04797	60S ribosomal protein L6	10735	6402.82	7240.36	7135.59	6345.01	4001.77	4968.31	7886.39	6291.83	4278.81	8931.29	7350.76	8402.92	8669.24	5489.14	7020.67
AVDSQILPK	P04797	60S ribosomal protein L6	9168.12	9143.26	7857.98	9373.12	6828.99	6862.84	6411.32	12737.7	6112.64	6966.41	10465.5	11672.6	10406.4	10467.3	6269.07	5610.13
SSITPGTVLIILTGR	P04797	60S ribosomal protein L6	2802.07	1073.75	2552.95	868.634	N/A	3934.86	1059.52	1569.79	2226.14	764.936	4839.74	1523.13	1431.97	3604.11	N/A	N/A
AVPQLQGYLR	P04897	60S ribosomal protein L6	3306.38	4167.9	3531.34	3806.52	2788.08	1256	N/A	4216.91	3557.53	2645.19	3824.84	3005.04	4293.56	5090.29	2229.25	2773.57
QLGSGLLLVTGPLALNR	P04906	60S ribosomal protein L6	1154.05	467.621	1519.62	538.308	1225.7	943.234	936.366	956.04	1548.52	441.45	2536.64	N/A	1399.45	1669.93	N/A	1233.9
DITAALAAER	P04906	Dynamin-1	122944	108122	128517	91533.5	131817	134247	104001	108954	109277	90192.5	130614	156334	99057.9	116037	125888	118852
TSGNQDEILVIR	P04906	Dynamin-1	91282.7	75508.3	83618.8	56109.1	87531.5	87013.9	74541.9	80722.9	80320	56916.3	86015.9	97144.2	64527.7	104771	113490	87574.4
FTDFEEVR	P05065	Dynamin-1	68275.2	62022.9	63456.6	55828.4	61278.1	71383.2	66422	49859.1	57254.4	60100.2	66793.4	77542.5	60623.9	69813	71927.9	62909.1
ENCLILAVSPANSDLANSDALK	P05065	Dynamin-1	6558.64	7186.36	8313.58	3384.49	10134.7	12612.5	6631.93	8163.98	3749.79	5586.3	11961.6	10064.3	6068.74	6610.67	21048.5	9468.82
IEGSGDQIDTYELSGGAR	P05065	Dynamin-1	53622.5	20196.8	19135.5	16662.8	25426.1	24128.6	21847	21650.3	42489.9	18709.6	22076.1	24110.3	21904.3	26566.9	27695.4	29459.2
KDITAALAAER	P05065	Dynamin-1	3017.26	1206.81	1558.95	1507.15	1799.96	1498.92	1658.62	1409.44	2819.8	1498.69	1832.17	1531.06	1379.65	1138.3	920.057	1420.97
KFTDFEEVR	P05065	Dynamin-1	3209.73	4634.13	3427.42	3352.38	4180.24	2471.36	2956.13	N/A	5563.33	4793.06	2974.96	4311.13	3719.54	N/A	3445.17	4763
FFLSHPSYR	P05065	Dynamin-1	8518.43	6341.25	8486.23	7781.72	6317.25	6539.13	8319.15	5841.15	10010.7	8786.82	10166.8	5956.23	9189.07	9411.58	N/A	10197.9
VPVGDQPPDIEFQIR	P05065	Dynamin-1	111729	31421.5	28382	15160.9	42865.7	37465.7	26719.6	42163	93764	17493.2	34912.9	50550.1	27579.6	40918	72262	41733
LQDAFSAIGQNADLDLPQIAVVGGQSAGK	P05065	Dynamin-1	31249.5	14039.5	14682.2	4804.58	33297.8	15056.1	20946.5	19950.8	15855.7	12088.7	19303	16703.1	17687.3	29778.7	79345.7	25404.1
CVDMVVSELTSTIR	P05065	Dynamin-1	10864.6	1517.42	14044.8	1052.04	27657.6	49853.1	6778.85	15617.6	13421.3	1744.66	36998	9255.39	5026.64	29073.1	69047.5	7462.28
NLVDSYMAIVNK	P05065	Dynamin-1	5396.2	6843.19	6112.57	4776.91	17352.4	11992.3	6196.52	10523.5	5241.22	5855.75	16709.4	7524.55	5622.21	7978.8	18515	6475.32
HIFALFNTEQR	P05197	Dynamin-1	6266.12	7542.65	10204.3	5323.3	7343.17	6714.38	6890.9	7697.12	9892.2	8366.17	6829.11	3583.96	6401.2	4631.46	N/A	6929.09
TGLFTPDLAFEATVK	P05197	Dynamin-1	36269.7	19928.1	24484.5	11521.7	45009.1	34240	23958.2	29397.9	18968.1	20805.1	32340.6	33663.9	18211.8	29235.2	50002.2	30640.7
KTSGNQDEILVIR	P05197	Dynamin-1	1119.32	1339.22	1640.32	2119.29	2449.44	1240.87	2506.5	1255	1114.78	1057.75	1620.79	1100.06	1558.15	581.587	1044.32	1237.6
RIEGSGDQIDTYELSGGAR	P05197	Dynamin-1	N/A	1109.01	2041.19	2487.69	3780.3	N/A	949.757	1833.56	741.401	820.436	650.185	902.371	1581.47	1391.4	1784.84	1699.8
GMEDLIPLVNR	P05197	Dynamin-1	47489.5	42213.3	99039.8	31010.2	142469	129787	33668.1	96538.8	39338.1	29306.7	153560	62735.6	37100.2	165707	164930	118309
YMLSVDNLK	P05197	Dynamin-1	12928.7	29087.3	37670.8	31507.9	42456	19586.3	11941.8	18489.5	9293.71	25692.8	46104.1	31968.1	27480	29347.9	17002.3	21316.6
VYSPHVLNLTLVDLPGMTK	P05197	Dynamin-1	2041.94	2411.77	4092.97	1581.48	5973.69	N/A	4292.77	3719.47	2928.39	1628.36	6840.95	3669.36	2495.85	4611.46	N/A	2691.43
VIYPAVEGR	P05197	5'-nucleotidase	13614.8	11504	9034.91	9911.15	11647.2	13688.7	6267.09	10113.1	13974	10162.7	14382.6	10467.9	9947.41	8968.29	9997.13	7797.69
YPFIVTSDDGR	P05197	5'-nucleotidase	7989.51	7089.6	5578.59	5650.07	9212.28	8980.07	2957.94	5571.53	8352.28	6070.92	10449.9	6434.32	6497.03	3436.78	4689.55	3602.79
GPLAPQISGLYLPYK	P05197	5'-nucleotidase	19078.7	7929.26	15866.4	6056.2	19710.3	29242.6	8357.38	12603.3	27425.1	8638.23	23879	12023	14202.7	22068.2	36258	14068.7
TTIFSPEGR	P05197	Proteasome subunit alpha type-4	24904.9	28064.1	22528.6	19874.8	24035.9	23534.3	22978.7	27217.4	21534.3	22216.7	23830.7	24976.2	22025.9	24603.7	24630.2	25168.1
VEIATLTR	P05197	Proteasome subunit alpha type-4	29381.6	27781.6	26179.1	20353.9	29311.2	30290.4	24154.5	23136.4	31732.6	24344.7	26730.8	34138	23293.5	31054.1	31308.1	29225
SALALAVK	P05197	Proteasome subunit alpha type-4	9096.48	7492.9	7759.07	6652.06	7369.67	8361.16	8105.9	6581.35	7055.8	6897.57	7270.07	7591.81	6479.98	10235.9	7714.91	7478.32
LLDEVFFSEK	P05197	Proteasome subunit alpha type-4	6123.12	5016.36	3090.54	1766.46	4391.53	5192.11	3229.53	5530.52	N/A	2764.48	4408.84	5745.91	3233.96	4566	9897.52	5110.04
HDIIGEFK	P05197	Synaptotagmin-1	57014.9	48487.5	57992.9	40190.2	47331.1	56497.6	51194.5	51296.6	59331.4	42694.1	50293.7	62675.4	50194	65018.5	60795.9	57930.2
NTLNPYYNESFSFEVPFEQIQK	P05197	Synaptotagmin-1	8443.83	7485.46	7616.05	5330.88	6824.48	4202.62	8507.63	12412.9	7365.77	6278.88	4821.6	6210.25	6862.9	7119.26	19097.2	9842.26
TLNPVFNEQFTFK	P05197	Synaptotagmin-1	140938	37373.9	80010.6	18502	96339.2	58762.2	63580.1	109646	104270	21131.8	47860.1	117259	62210.6	92330.4	181586	101218
VFVGYNSTGAELR	P05197	Synaptotagmin-1	197781	155801	174393	70313.4	183389	201861	174219	190235	215081	124063	172435	196044	155406	172773	204271	188601
LTVVILEAK	P05197	Synaptotagmin-1	102717	111174	109267	66210.8	83108	103601	103318	92415	116874	72406.6	114982	104171	69598.8	128240	42883.7	71868.7
TLVMAVYDFDR	P05197	Synaptotagmin-1	28269.9	39893.8	53686.3	13745	53882.4	52413.1	33284.2	53884.3	38114.1	13196.1	69437.5	59634.9	16249.2	63479.9	23474.5	44983.1
ELIFQETAR	P05369	Mitogen-activated protein kinase 3	10972.7	10650.7	10289.8	9323.33	9009.59	8831.04	11057.4	11818	11719	9604.64	9217.92	12723.8	8070.92	10307.1	7922.83	7877.96
ALDLLDR	P05369	Mitogen-activated protein kinase 3	6410.38	5971.2	7433.81	5476.41	6885.4	7361.31	6249.93	6520.7	6534.47	5356.96	6454.61	7296.28	4603.65	9792.28	7539.27	6774.68
GTAGVVPVVPGEVEVVK	P05370	Mitogen-activated protein kinase 3	8229.73	7691.96	7613.87	3420.77	9003.73	9769.78	5735.68	8839.53	8155.96	5086.45	7873.71	9621.24	5934.48	7759.94	13174.7	9946.94
QQYLQSIEDR	P05370	Succinate dehydrogenase [ubiquinone] iron-sulfur subunit, mitochondrial	3159.43	4437.65	4510.8	3755.79	4973.75	3666.1	4550.11	5233.76	4620.69	4189.97	4203.3	5481.2	4379.57	4882.23	5318.4	5610.79
LQDPFSLYR	P05370	Succinate dehydrogenase [ubiquinone] iron-sulfur subunit, mitochondrial	N/A	5670.03	5402.79	3319.3	6656.25	4234.07	3998.46	5596.09	3799.14	3365.07	5169.35	5497.46	3656.32	3534.64	5872.36	6478.31
DLVPDLSNFYAQYK	P05370	Succinate dehydrogenase [ubiquinone] iron-sulfur subunit, mitochondrial	5895.57	2651.15	3174.65	1151.27	4091.95	4650.07	3116.28	4297.19	3615.45	1740.37	5657.63	4117.66	3296.4	4657	9825.72	4979.8
IKNEIDSTLTFR	P05370	Succinate dehydrogenase [ubiquinone] iron-sulfur subunit, mitochondrial	2146.82	2206.51	4834.28	3401.08	3009.13	2503.72	4531.24	3103.84	N/A	3766.52	3178.02	2484.79	3543.69	2976.86	2543.24	2761.39
DQGLTEEDIVFLPQPDK	P05370	Prostaglandin-H2 D-isomerase	9883.74	3572.01	1236.53	1386.13	6805.62	7495.18	2628.35	6654.26	15387.5	2056.14	8625.92	5859.57	8581.67	7726.62	38101.7	15586.9
ELVDDSITNVK	P05370	Protein-L-isoaspartate(D-aspartate) O-methyltransferase	3332.48	2850.61	2895.08	2795.53	2500.3	2742.06	2561.42	2934.27	N/A	2413.3	3368.15	3325.39	2728.9	3408.47	2189.8	2958.85
LHQVTFEVPTCEGK	P05370	Synaptoporin	39049.9	29776.9	32792.2	28443.3	30518.8	26953.1	36891.5	34780.4	31571.2	30303.3	30532.2	39993.7	31661.9	37459	38738.8	39044.8
EVLLLMSACK	P05426	Synaptoporin	13337.6	13778.7	15501.5	13189.1	17842.2	17469.1	6091.24	16153.5	9615.48	11086.1	22152.6	11655.3	12124.3	22749.9	11946.6	14272
IGPLGLSPK	P05426	60S ribosomal protein L12	19973.4	19597.1	16506.5	14369.9	17176.1	17151.6	15633.7	18251	18934.2	13245	16655.6	21324.7	13808.7	18057.8	16405.4	15097.3
EILGTAQSVGCNVDGR	P05426	60S ribosomal protein L12	7949.25	5706.88	4828.36	4282.65	4561.62	4257.05	4009.31	7991.95	5314.61	4101.37	3962.19	7147.39	4458.79	7064.16	7606.3	7262.27
QAQIEVVPSASALIIK	P05426	60S ribosomal protein L12	5755.72	3787.22	2909.04	1528.29	3449.83	4204.12	1858.45	4047.34	6006.29	2078.64	4011.05	4340.23	3015.84	2860.23	8826.08	3356.38
CTGGEVGATSALAPK	P05696	60S ribosomal protein L12	2873.11	5431.05	3352.8	3778.3	3788.83	3625.99	2561.21	2987.86	5406.79	3281.72	4549.57	2968.89	3114.03	2708.99	3514.32	3635.48
VLSTPDLEVR	P05696	Coatomer subunit beta	17399.4	15232.1	15627.8	10718.7	17691.9	19483	16967.1	14274.5	14688.4	12730.2	13227.8	17319.8	13567.9	16389.5	19817.3	16176.3
SLGEIPIVESEIK	P05708	Coatomer subunit beta	4414.17	4509.18	3396.43	1881.51	3785.74	5188.34	3335.78	N/A	4638.85	2551.34	3319.71	4639.19	3330.98	6185.92	7421.86	3997.25
DLQHPNEFIR	P05708	Coatomer subunit beta	5535.01	4086.76	5130.53	3842.96	3889	3458.26	4928.61	3854.53	5346.57	3418.69	4372.96	N/A	4221.92	4410.52	N/A	4447.46
YEAAGTLVTLSSAPTAIK	P05708	Coatomer subunit beta	3745.27	2702.21	2468.57	1249.13	1948.05	2268.66	1143.16	3929.77	2589.9	1863.54	2206.04	2336.84	2912.19	4581.54	4467.42	3403.95
EAGELKPEEEITVGPVQK	P05708	Coatomer subunit beta	10824.2	9001.36	10156	7351.96	10189	10322.9	10233.1	10847.4	7688.87	7624.4	8744.76	10660.3	8985.08	10239.3	12919.2	10290.2
EAELLEPLMPAIR	P05708	Coatomer subunit beta	N/A	1506.56	2177.16	1091.8	1500.5	1662.29	1393.12	1921.9	N/A	1060.82	N/A	2653.27	1841.68	3347	5507.65	1781.59
IFGGLIR	P05708	Band 3 anion transport protein	214217	86565.9	84006.7	65545.2	121568	132127	136698	120494	121927	18717	93243.1	100053	117881	191900	133380	102432
TIEIEGLR	P05708	Alpha-internexin	17346.1	20035	17351.6	13457.1	19203.2	17791.2	14889.1	13591.2	18346.9	15934.6	15757	19357.4	13907	20802.1	19377.7	15369
FAVFIEK	P05708	Alpha-internexin	1776.21	1531.28	1755.94	2634.21	5343.99	N/A	1219.32	852.431	3776.56	2624.89	2288.24	1372.06	1585.9	1671.08	N/A	998.367
FANLNEQAAR	P05708	Alpha-internexin	N/A	2068.03	1745.66	2041.55	3983.78	1753.82	N/A	1179.62	2719.66	2315.27	1735.55	2077.9	1418.11	N/A	1652.54	N/A
LATTALYFTYSALEEEMDRNK	P05708	Heme oxygenase 2	6153.6	2946.31	4277.31	3514.72	3595.85	3037.43	5957.54	6254.68	4975.61	3949.14	5028.89	4533.33	6138.44	7155.49	5991.88	6064.9
FSVNLDVK	P05708	Alpha-crystallin B chain	81773.6	21563.4	6414.08	91935.2	5597.64	32128.7	68134.5	151601	368669	150738	16485.6	65994.6	75569.3	72920.3	97260.9	4971.99
HFSPEELK	P05708	Alpha-crystallin B chain	45189.2	12390.4	2459.89	38972.5	2145.41	14679.5	32363.3	58020.3	215999	85975.1	5664.24	42271.3	37002.6	30156	59295.6	1366.72
VLGDVIEVHGK	P05708	Alpha-crystallin B chain	112426	34356.7	7385.23	112674	6220.55	38640.9	77489.6	163060	599152	192441	16885.4	89505.5	104271	76201.5	130897	4412.74
IPADVDPLTITSSLSSDGVLTVNGPR	P05708	Alpha-crystallin B chain	2156.06	586.411	64443.2	524.306	N/A	N/A	957.115	1367.79	11062.5	882.367	N/A	1314.38	1448.18	665.377	7426.57	N/A
APSWIDTGLSEMR	P05708	Alpha-crystallin B chain	5838.97	3265.28	N/A	7339.85	N/A	3294.39	6739.29	24017.4	43025.1	10275.5	N/A	6377.2	8711.26	10145.4	12297.3	N/A
MDIAIHHPWIR	P05708	Alpha-crystallin B chain	986.39	1593.51	N/A	14953.8	N/A	1445.7	7963.7	11575	30549	16578.3	686.382	3415.02	11644.4	3028.94	2160.5	N/A
ALQLGTLFPPAEALK	P05708	Enoyl-CoA delta isomerase 1, mitochondrial	18754.7	9397.83	14285.3	2016.49	14357.7	20614	12550.7	16118.5	19819.9	6555.69	16610.8	10807	10571.4	32601.4	47373.8	17256.9
EADIQNFTSFISR	P05708	Enoyl-CoA delta isomerase 1, mitochondrial	4645.29	2808.21	2553.22	1224.35	2622.69	2698.08	2672.58	3443.99	2731.83	1853.42	2275.75	2153.39	2323.94	1946.4	5032.17	3191.34
FPYLCGK	P05708	Sodium- and chloride-dependent GABA transporter 1	72611.7	48853.2	55888.4	55779.1	55257	63330.2	68852.9	54189.1	69110.6	57753.9	62624.5	53225.6	55789.1	64824.6	68047.5	63240.4
VADGQISTEVSEAPVASDKPK	P05712	Sodium- and chloride-dependent GABA transporter 1	62708	30765.2	37661.8	56356.3	62851	79453.8	59223.6	70819	51041.6	18415.4	56178.7	68750.1	28338.8	65549.8	82866.6	36248.5
EGILFYITPNFR	P05712	Sodium- and chloride-dependent GABA transporter 1	1936.44	718.26	1680.92	638.75	3174.44	1568.38	1086.14	1577.83	1535.77	768.344	2151.51	915.958	881.947	219.282	N/A	1868.87
YSLDPENPTK	P05712	60S ribosomal protein L17	13285.1	14593.1	13881.8	11625.7	12635.5	14386	11181.1	14664.8	18729.3	11147.1	13899.6	13872.9	12389.8	14624.2	16023	14241.1
QAVDVSPLR	P06238	40S ribosomal protein S5	11931.8	13505.8	10007.3	8704.99	11853.6	10322.8	9655.67	11628.1	13267.9	8870.8	13215.3	12514.7	9783.35	9782	11469.6	11029.2
LGGEEVSVACK	P06238	Alpha-2-HS-glycoprotein	828.355	1760.67	N/A	1057.86	1345.19	1366.48	1239.92	N/A	1449.56	888.609	1121.72	2427.43	1112.61	N/A	2118.72	1703.92
ALTTQLIEQTK	P06238	Thimet oligopeptidase	27987.1	26671	28850.6	23851.4	27324.6	29651.3	25611.8	29609.4	36126.9	24077.8	22920.6	31994.8	24927.5	33541.3	37541	29759.5
AVILELK	P06238	Thimet oligopeptidase	13059.4	8740.67	10780.8	7289.72	11755.9	9910.04	9129.09	7919.23	10003.8	8523.78	9881.87	9967.29	6610.8	12868.7	9310.94	8481.44
SNLLGFR	P06238	Thimet oligopeptidase	27521.8	32382.8	29001.7	21212.4	35209.5	36265.6	28053	26188.3	25876.2	22334.2	27614.4	27897.1	24106.9	41742.7	34293.6	33826.9
LLEEAFNCR	P06238	Thimet oligopeptidase	25949.4	17274.2	11259.5	14357	13617.3	17451.4	16877.5	19592.2	22558.1	17318.8	13675.9	22205.2	16432.8	15870.3	20443.3	18362.9
TGGEAPEDLLEK	P06238	Thimet oligopeptidase	17112.7	16820.6	16606.8	12255.4	16680.2	18019.9	12605.9	16844	13792	12814.2	15107.3	17722.4	14662.8	14211	18713.1	15834.2
GLQVEGCEPPAC	P06238	Thimet oligopeptidase	10522.6	10414.3	8961.71	6674.01	11423.7	11148.4	8329.8	7671.31	9341.69	8975.73	9992.78	9072.07	9256.03	8522.37	11067.9	10395.9
FYLDLYPR	P06685	Thimet oligopeptidase	7582.81	5333.24	4817.8	2843.83	5781.1	5489.34	4447.94	5168.11	8449.23	4387.18	6844.74	3935.98	4909.26	8948.36	3811.38	6605.99
QANAGLFNLR	P06685	Thimet oligopeptidase	7693.38	7304.86	6968.92	4539.27	7444.85	8236.62	7068.49	6080.3	7615.71	6663.2	7012.84	5313.69	6221.8	9297.93	8226.61	9611.96
QDAFLLSK	P06685	Thimet oligopeptidase	6258.17	5876.53	6024.3	4398.23	6278.55	6235.63	5258.74	4252.15	4770.06	4315.51	5921.77	6179.92	4558.94	5515.38	5580.26	6373.92
WDLSAQQIR	P06685	Thimet oligopeptidase	3960.75	4886.83	6240.94	3733.61	5402.52	5432.58	5716.22	N/A	6546.39	5231.46	4342.11	5273.91	6348.52	5046.86	5023.93	5736.35
LSLLCIDFNK	P06685	Thimet oligopeptidase	N/A	2772.28	3866.39	2108.94	3627.39	4572.27	2191.78	2548.07	2496.56	2911.18	4649.54	2281.89	1896.38	4721.67	N/A	3170.88
TSQTVATFLDELAR	P06685	Thimet oligopeptidase	9821.19	2893.39	3135.16	1285.7	6329.91	8155.88	4748.22	9010.7	7701.53	2054.14	6318.51	7382.62	5762.82	10376.7	12663.7	7309.24
VGAQDFEDVSYESTLK	P06685	Thimet oligopeptidase	5683.84	3075.54	1781.27	1178.23	2326.64	1836.85	2588.74	2099.63	4605.56	1494.43	1922.66	3027.37	2100.21	1656.76	2639.27	2650.43
NILDFPQHVSPNK	P06685	Thimet oligopeptidase	3873.61	3224.06	5277.31	2388.94	4727.57	5348.69	2639.77	3333.9	N/A	2636.27	5095.29	4430.68	2486.81	2205.31	3479.87	4656.48
VDQVLHTQTDVDPAEEYAR	P06685	Thimet oligopeptidase	11038.8	10804.6	12423.1	10165.7	13497.2	12015.8	11130.3	11682.6	10321	9659.9	10232.4	12271.6	10313.3	12054.6	14958	12683.6
ALADVEVTYTVQR	P06685	Thimet oligopeptidase	5355.85	5182.68	4299.35	2791.15	4267.9	3293.53	5767.51	5094.28	2991.4	2835.65	2074.46	3652.45	4230.81	2510.38	N/A	4268.18
QPGVVFIAAK	P06685	Cathepsin D	32673.6	17870.1	17430.4	13337.2	24725.8	21325.6	21810.8	18789	18171.6	16525.7	20850	16962.5	19272.3	22292.5	22804	24776
EPVSELLK	P06685	Cathepsin D	20098.2	16312.8	13538.8	10557.9	14275.2	13203.9	13147.3	13399.3	14970.6	10343.4	13341.2	14769.4	10910.3	16181.2	15234.4	13919.4
LGGQNYELHPEK	P06685	Cathepsin D	4565.7	2557.58	2841.39	1762.96	3097.8	2828.98	2523.31	2232.54	2387.43	2435.49	2834.06	2801.8	2440.29	3312.82	3616.51	2553.56
GGCEAIVDTGTSLLVGPVDEVK	P06685	Cathepsin D	10593.4	7088.09	6572.77	3435.2	8386.87	9590.72	8286.69	6693.06	6741.09	6148.7	6991.52	8000.82	5171.45	7220.54	18960.8	7984.2
VSSLPIITFK	P06685	Cathepsin D	39905.8	30308.1	30374.7	16354.7	37040.4	39884.9	29134.2	30730.5	30107.9	22534.2	39576.3	25291.8	25934.2	46180.9	71648.9	41168.2
NIFSFYLNR	P06685	Cathepsin D	7910.9	4849.1	5044.35	2529.79	8994.03	4919.23	4040.11	3476.96	9055.92	2398.81	7199.68	N/A	3455.01	7357.26	N/A	6130.17
AIGAVPLIQGEYMIPCEK	P06686	Cathepsin D	5919.14	2500.95	2518.41	1236.18	3879.65	6908.73	2773.03	6142.43	4167.97	1152.88	4446.5	3702.83	2915.79	13905.6	13637.6	7869.31
DPTGQPGGELMLGGTDSR	P06686	Cathepsin D	14054.6	4975.07	6020.94	4634.74	7146.65	3709.7	5517.06	7415.91	N/A	3885.39	10133.5	8406.25	8138.25	20163	12298.7	10474.2
YLGTQPEPDAVGLDSGHIR	P06686	Thiosulfate sulfurtransferase	1729.55	1731.78	2044.3	1893.66	2199.85	N/A	2748.26	N/A	1979.11	2494.57	N/A	2069.68	2078.78	N/A	1725.24	1899.18
DVIIVDCGK	P06686	Peptidyl-prolyl cis-trans isomerase B	9037.8	10471	7545.96	6521.45	6329.75	7844.4	8370.32	6805.23	7488.23	9200.15	8960.9	7957.33	6268.92	6643.63	6589.91	7137.51
VTFGLFGK	P06686	Peptidyl-prolyl cis-trans isomerase B	4024.78	2964.04	2879.27	2177.45	3826.94	3134.69	3090.45	2928.55	2875.19	1964.15	4261.06	N/A	2243.54	N/A	2956.91	3746.69
TVDNFVALATGEK	P06686	Peptidyl-prolyl cis-trans isomerase B	5666.89	6908.63	4030.84	3433.39	5307.12	5567.54	5331.05	4754.59	6176.16	3582.69	6184.72	7312.5	5049.29	4827.07	6890.32	7327.19
ALGPFYPSR	P06686	Alpha-crystallin A chain	1.59294e+06	634201	148230	1.95831e+06	106912	434033	820559	1.82383e+06	7.78095e+06	2.13508e+06	224348	1.42813e+06	965828	793813	1.58499e+06	86778.2
VLEDFVEIHGK	P06686	Alpha-crystallin A chain	319085	114109	35512.9	474561	19616.1	107720	184438	460974	1.56221e+06	424703	44441.8	400979	223762	227946	348037	18056.8
HFSPEDLTVK	P06686	Alpha-crystallin A chain	385521	81486.4	20556.2	340964	24331.7	63390.9	119327	268798	1.45014e+06	355213	28254.5	240214	162153	137446	452380	24008.2
LPSNVDQSALSCSLSADGMLTFSGPK	P06686	Alpha-crystallin A chain	6012.86	3308.68	969.776	17174.4	1233.26	951.811	5493.66	8564.37	57209.9	12008.7	1768.48	8348.28	5412.54	5827.74	8149.29	N/A
FVIFLDVK	P06686	Alpha-crystallin A chain	43123.8	12118.4	1057.15	27390.2	N/A	10286.7	8712.53	29082.4	161655	32190.8	2875.94	20520.4	5280.43	10976	3193.39	N/A
MDVTIQHPWFK	P06687	Alpha-crystallin A chain	49081.6	24871.1	12032.8	29656.7	N/A	34133.8	46653.3	104868	210222	42800.7	8371.82	64880.1	65210.6	43357.5	65415.2	N/A
IVQVTAADAFLDLIR	P06687	Excitatory amino acid transporter 1	51843.8	17285.8	41183.6	11047.1	72807.2	72838.5	36369.1	44037.4	50642.6	20837.3	39543.8	32736.7	26841.8	54100.3	37660.1	33889.4
KPYQLIAQDNEPEKPVADSETK	P06687	Excitatory amino acid transporter 1	1706.36	3037.97	2056.84	4387.44	552.184	714.103	5430.89	1146.98	5384.25	3275	2377.86	1442.75	3859.28	1232.19	1289.42	2121.75
TTTNVLGDSLGAGIVEHLSR	P06687	Excitatory amino acid transporter 1	136415	96046.1	49578.9	25235.3	122766	118537	51336.1	111938	125369	36708.6	109830	114087	42122.3	149275	115037	64476.2
DVEMGNSVIEENEMK	P06687	Excitatory amino acid transporter 1	3829.9	4660.78	10034	3383.89	8481.55	8228.42	2380.24	8558.35	2625.55	2121.11	14267.3	5325.91	3654.87	19951.3	6159.81	4368.19
HGESAWNLENR	P06687	Phosphoglycerate mutase 1	3653.23	3510.49	4511.35	3355	2422.22	5103.69	4904.77	4594.41	8191.21	4172.1	1787.13	3565	4211.64	3265.81	3831.22	4276.94
YADLTEDQLPSCESLK	P06687	Phosphoglycerate mutase 1	156225	142884	118536	90635.4	113702	105883	111385	119918	230355	86146.9	117018	138549	111257	139337	180393	157208
ALPFWNEEIVPQIK	P06687	Phosphoglycerate mutase 1	89197.2	22916.8	39052.2	10745.4	16252.2	56911.1	16191.6	61671.6	107498	14823.9	9020.45	27612.1	27476.8	39635.7	179307	64895.6
DAGYEFDICFTSVQK	P06687	Phosphoglycerate mutase 1	14156.1	9541.57	6435.14	3510.51	3718.24	2613.55	3625.91	6096.1	18452	4759.57	4404.74	8469.46	5130.97	5626.23	6911.5	7724.85
RYADLTEDQLPSCESLK	P06687	Phosphoglycerate mutase 1	5052.18	5925.13	5521.1	4798.97	5329.06	6113.32	6373.67	5827.87	6300.46	3984.65	4432.08	6690.11	4408.79	5872	5449.71	7395.01
SYDVPPPPMEPDHPFYSNISK	P06687	Phosphoglycerate mutase 1	40950.3	44686.2	90944.9	40896	90290.7	68278.6	31602.5	98923.3	74451	32031.3	155371	106180	41486.5	126530	81331	106925
FSGWYDADLSPAGHEEAK	P06687	Phosphoglycerate mutase 1	10594.2	13036.3	16113.5	11699.1	8200.91	11721.7	17299	17959.9	22135.4	11298.1	5785.1	13415.9	17358.7	9346.65	8829.48	14073.2
HLEGLSEEAIMELNLPTGIPIVYELDK	P06687	Phosphoglycerate mutase 1	1527.14	392.09	779.062	272.155	1442.62	N/A	2053.05	2877.05	3362.39	164.949	1398.76	3565.55	747.108	3436.76	N/A	1466.85
TGQEVVFVAEPDNK	P06687	Dolichyl-diphosphooligosaccharide--protein glycosyltransferase subunit 2	9079.38	7859.01	6416.82	4930.02	7493.77	6996.69	6479.12	8344.71	8130.17	6035.57	7579.08	7719.89	7898.49	9619.74	10027.3	8396.54
YIANTVELR	P06687	Dolichyl-diphosphooligosaccharide--protein glycosyltransferase subunit 2	14417	11718.5	10820.9	10555.7	11816.8	12626.3	14764.6	12449.8	12347.6	11010	9471.05	10366.4	12597.1	13216.8	14157.7	11677.7
LPSGYYDFSVR	P06687	Dolichyl-diphosphooligosaccharide--protein glycosyltransferase subunit 2	6559.77	4537.27	3689.21	3670.58	6084.34	5790.72	5205.75	5235.72	8071.28	4255.28	4972.17	4549.57	5807.3	4893.03	5323.16	5353.92
LQVSSVLSQPLAQAAVK	P06687	Dolichyl-diphosphooligosaccharide--protein glycosyltransferase subunit 2	8798.62	1540	2633.24	1274.41	3559.91	3091.09	2653.63	4144	4931.68	1739.4	3461.71	2068.13	2666.24	4056.54	10770.1	3148.66
QEIQHLFR	P06687	Dolichyl-diphosphooligosaccharide--protein glycosyltransferase subunit 2	2318	1928.18	1583.18	1053.13	1763.09	2241.21	2142.1	1873.94	2143.02	1081.51	1957.95	2154.48	1490.76	2068.21	1880.72	1751.87
FPEEEAPSTVLSQNLFTPK	P06687	Dolichyl-diphosphooligosaccharide--protein glycosyltransferase subunit 2	N/A	1077.78	1698.12	462.841	1074.38	1421.56	1103.31	1163.04	1611.83	1028.68	1338.36	1461.97	1314.67	N/A	N/A	548.89
NIVEEIEDLVAR	P06687	Dolichyl-diphosphooligosaccharide--protein glycosyltransferase subunit 2	4064.2	1486.42	1120.91	360.097	2726.32	3572.17	1698.64	3940.03	1819.31	670.636	1985.42	2562.09	1469.69	4238.05	N/A	1515.32
YHVPVVVVPEGSASDTQEQAILR	P06761	Dolichyl-diphosphooligosaccharide--protein glycosyltransferase subunit 2	6846.02	6806.96	4149.87	3524.71	4419.29	3021.33	5790.79	6391.69	4597.92	4086.01	4767.21	7231.79	5402.92	6768.62	5657.89	6109.71
LGFVAGVINR	P06761	V-type proton ATPase 116 kDa subunit a1	108934	72416.7	82160.7	58102.7	92035.9	84390.4	77325.8	72756.4	111823	70033.3	92498.7	72417.7	72642.6	82442.7	66718.3	81181.1
GTEHSGSTVPSILNR	P06761	V-type proton ATPase 116 kDa subunit a1	29864.4	26614	24385.9	22756.2	23641.5	30008.7	27391.2	29093	25397.8	20542.8	26836	31902.5	27987.1	28733.8	29666.6	26611.3
FYTGTGFK	P06761	V-type proton ATPase 116 kDa subunit a1	45832.2	42015.7	40872.2	36665.4	45043	48437.7	39426	44803.1	41923.8	36768.5	44220.6	42953.6	39289.3	48576.3	48526	42072.5
NFLELTELK	P06761	V-type proton ATPase 116 kDa subunit a1	32449.7	37387.9	27564.5	16950.5	37846.9	37948.3	24815.2	30198.2	34051.5	21356	37171.1	32440.8	25836.7	45289.1	61850.7	29291.4
LTFLNSFK	P06761	V-type proton ATPase 116 kDa subunit a1	23051.6	21136.5	20501	14133.1	20589.8	22228.7	19672.7	15412.4	22582.2	17140.8	22949.5	20988.9	16932.2	25801.1	21489.9	18913.7
HLGTLNFGGIR	P06761	V-type proton ATPase 116 kDa subunit a1	5558.73	4666.12	3856.08	6379.34	6042.67	5873.58	6471.21	3560.86	7737.24	5745.53	7768.58	4367.51	6343.2	7627.32	1882.63	5149.8
DLNPDVNVFQR	P06761	V-type proton ATPase 116 kDa subunit a1	135681	70451.1	65213.6	43740.3	107402	102267	71805	85719.3	92260.9	48825.1	89131.9	104497	69224.7	94552.3	121878	93240.9
ASLYPCPETPQER	P06761	V-type proton ATPase 116 kDa subunit a1	69046	60032.7	51904.3	48469.8	56123.7	53866.2	52555.7	66642.2	59943.6	55823.5	62656.9	64438.3	59513.4	68873.2	81201.6	65977.7
DMIDLEANFEK	P06761	V-type proton ATPase 116 kDa subunit a1	18693.5	11450.9	17319.5	13632.9	22406.2	12627.9	16016.7	20541.3	10555.8	9824.83	27323.9	27577.8	13533.3	20382.4	13426.1	14723.4
AIYHTLNLCNIDVTQK	P06761	V-type proton ATPase 116 kDa subunit a1	9817.86	9368	11454.7	8731.36	13016.7	11654	12734.1	8749.47	10216.7	9554.97	10453.2	7331.27	12021.7	13874.8	12145.4	12914.7
ANIPIMDTGENPEVPFPR	P06761	V-type proton ATPase 116 kDa subunit a1	2639.4	4928.5	5745.97	1426.02	6266.71	6224	2754.74	8128.1	N/A	1858.82	24100.3	N/A	2072.81	6289.75	8753.11	3726.19
SVFIIFFQGDQLK	P06761	V-type proton ATPase 116 kDa subunit a1	9484.68	5809.37	5066.9	3408.17	7696.46	6715.98	5446.78	6905.03	11244.9	3699.89	4594.19	6126.67	3340.07	7629.32	N/A	2470.72
QAEIENPLEDPVTGDYVHK	P06761	V-type proton ATPase 116 kDa subunit a1	12664.4	10298.7	10897.4	7991.81	13394.1	11557.1	11079	11022.4	14474.1	8863.62	11358.5	14588	11274.5	12107.9	16372.7	12388.6
FTHGFQNIVDAYGIGTYR	P07150	V-type proton ATPase 116 kDa subunit a1	N/A	3521.67	5787.25	4987.34	3876.49	2546.92	6603.83	4739.54	1954.36	4306.38	4249.47	2966.83	4654.25	4152.68	N/A	4466.17
GLSLPPACTR	P07150	Creatine kinase U-type, mitochondrial	71169.7	80730.8	64142.1	60034.3	72296.6	72888.4	63636.1	66013.1	82065.1	61182.3	71632.3	82666.3	59160.5	60791.9	67647	76796.8
IPPPLVHGK	P07150	Creatine kinase U-type, mitochondrial	4184.27	5240.03	5627.31	4110.05	N/A	5909.26	5265.86	3584.63	6801.28	5876.28	6664.72	7054.24	5172.83	6803.65	6705.56	7432.5
LYPPSAEYPDLR	P07153	Creatine kinase U-type, mitochondrial	10501	7548.36	5566.43	6202.51	5791.55	9328.55	5717.38	5404.64	13855	5455.51	7123.19	6218.54	10065.7	8232.58	9958.19	13238.6
VVVDALSGLK	P07153	Creatine kinase U-type, mitochondrial	83786.3	90965.9	77530.2	62429.2	97506.4	96651.6	69277.7	79464.3	86877.8	67891.1	86740	108648	71431.9	102135	120047	99785.1
LAFIAHPK	P07153	60S ribosomal protein L29	N/A	1289.75	1002.92	1010.02	808.764	986.963	1054.43	1074.65	1085.09	1193.17	1827.36	1456.01	1470.13	N/A	573.318	1283.1
YAGVFHVEK	P07153	CD44 antigen	3970.21	2682.72	3225.05	2206.44	2646.36	2786.54	3225.81	3250.35	2832.52	2881.65	2650.55	3143.87	2809.1	2882.02	3159.2	3151.32
YGFIEGHVVIPR	P07153	CD44 antigen	3119.31	N/A	3245.59	3333.93	2814.87	1551.86	4155.21	2062.73	2978.97	2917.97	2500.76	N/A	3828.36	2512.65	N/A	3292.07
AILAELTGR	P07153	Pyruvate dehydrogenase E1 component subunit alpha, somatic form, mitochondrial	81861.4	60371.8	62136.1	40126.7	58870.1	69296.4	59936.7	63233.4	60429.7	40897.7	55755.6	71040.8	49097.8	91294.9	76399.3	62417.7
GDFIPGLR	P07153	Pyruvate dehydrogenase E1 component subunit alpha, somatic form, mitochondrial	56585.9	37028	31096	20543.7	37804.9	42216.9	31011.6	35376.9	37739.7	25154.5	43964.4	43126.5	25161.2	36567.1	44092.1	38022.4
LEEGPPVTTVLTR	P07153	Pyruvate dehydrogenase E1 component subunit alpha, somatic form, mitochondrial	22724.4	19392.7	13949.5	10530.7	17190.2	16134.5	16005.9	17029.2	19950.5	11283.6	17293.7	18486.5	13046.4	16245.3	17332.2	16854
LPCIFICENNR	P07153	Pyruvate dehydrogenase E1 component subunit alpha, somatic form, mitochondrial	8949.36	6371.9	3833.59	3608.74	6143.39	5434.92	4918.95	5218.23	7189.05	4093.16	3905.05	4941.08	4999.58	4209.28	4982.35	5729.96
VDGMDILCVR	P07153	Pyruvate dehydrogenase E1 component subunit alpha, somatic form, mitochondrial	5534.14	4397.57	5670.37	4071.21	5342.12	5379.94	1942.69	4882.15	2389.44	3234	7084.52	5378.64	4680.72	6959.45	4953.76	4779.66
SDPIMLLK	P07153	Pyruvate dehydrogenase E1 component subunit alpha, somatic form, mitochondrial	6762.24	7111.14	7672.47	6210.76	7821.33	7129.26	4417.67	7251.71	3243.09	5002.94	12368.7	7024.94	5939.92	14530.9	5351.54	5986.63
GNINVEGPPR	P07323	Basigin	64271.1	53655	55632.1	37816.9	57902.6	59974.5	48513.4	49729.6	46712.9	47612.8	58204.6	70579.9	45993.6	55117.8	70349.4	49424.2
AQASVVVLEPGTIVTSVQEVDSK	P07323	Basigin	7807.01	8803.41	10503.3	3613	12250.8	11857.7	8800.12	8388.98	7008.79	6766.4	13125.8	14083.4	6888.4	8796.96	22690.2	11537.8
QHAASTLSVDGLAAEDTGTYECR	P07323	Basigin	5321.8	4047.85	3791.84	3526.38	2445.15	2515.68	4070.33	2638.56	4863.77	3424.14	1749.22	2583.49	3828.5	2860.7	3416.93	3594.05
KPDQTLDEDDPGAAPLK	P07323	Basigin	28999.3	11427.5	11162	10731	11546.4	11001.1	13211.3	10414.5	11588	10441.7	13622	27828.8	13040.1	28903.6	16727.7	12873.7
SGEYSCIFLPEPVGR	P07323	Basigin	72112.2	17468.6	14344.9	7184.98	22854.5	47871.8	12920.7	20238.3	55016.6	10199.6	37750.4	44400.5	30760.4	43363.1	112801	47250.7
VLQEDTLPDLQMK	P07323	Basigin	23340.5	20213.8	22654.4	5504.6	25552.2	25405	17387.1	25463.2	17296.8	7395.27	27362.9	24497	17252.5	34025.7	29244.9	24514.8
RKPDQTLDEDDPGAAPLK	P07323	Basigin	1495.93	2938.21	1362.71	2722.12	N/A	788.296	3732.62	917.316	3982.94	2064.77	2744.08	2438.35	3319.53	2017.54	2495.95	3564.98
VLLPEYGGTK	P07323	10 kDa heat shock protein, mitochondrial	15382.2	13405.2	13267.4	13850.9	13412.7	13179.9	13791.6	16531.5	15547.3	13209.9	17422.9	17307.6	11653.9	19910.3	12441.6	12956.2
FLPLFDR	P07323	10 kDa heat shock protein, mitochondrial	4831.39	2553.45	1830.62	963.294	1909.33	N/A	1472.26	2192.63	3849.36	1304.29	N/A	3557.8	1260.96	2445.69	N/A	2169.54
VLQATVVAVGSGGK	P07323	10 kDa heat shock protein, mitochondrial	8100.32	5731.08	5918.19	5687.11	4825.92	5665.13	5516.76	7640.59	5733.52	4246.63	6379.4	7729.47	5306.2	10271.6	2850.14	5125.45
ITEALHSIK	P07335	Carbonic anhydrase 2	123865	92843.5	110777	68966.2	109214	94817.2	89976.6	122901	110292	121390	92313.9	118766	77446.8	124032	136894	118996
QSPVDIDTGTAQHDPSLQPLLICYDK	P07335	Carbonic anhydrase 2	87478.9	32771	24072.3	15326.1	25677.6	30818.4	24480.7	35198	77538.8	24848.2	24449.3	38045	29969.1	38748.7	132009	42957.6
AVQHPDGLAVLGIFLK	P07335	Carbonic anhydrase 2	38339.6	37827.6	46105.9	26251	43851.2	71061.4	54194.1	43883.9	90796.3	37183.1	54737.8	42549.7	28857	88483.4	33136.4	53777.3
EPITVSSEQMSHFR	P07335	Carbonic anhydrase 2	24306.3	22919.1	23107.6	24685.5	19072.6	23636.7	19205.3	21607.2	27276.5	26134.4	26018.4	22305.1	20864.2	27412.4	18865.7	20717.5
LEIANVQYR	P07335	CD59 glycoprotein	6992.83	8952.97	8016.8	8004.1	9216.03	7951.78	6584.71	9845.22	10648.1	7972.87	13212.9	8391.38	7614.17	13175	8915.08	7175.96
VIGGDDLSTLTGK	P07335	Hypoxanthine-guanine phosphoribosyltransferase	76362	70606.6	73921.2	47830.2	68009.9	77438	60147	71674.1	76197.5	45359.1	68133.7	100410	48902.5	85534.1	92735.9	87146.3
DLNHVCVISESGK	P07335	Hypoxanthine-guanine phosphoribosyltransferase	12010.2	10134.6	11381.1	10633.9	12248.4	10865	11321.9	11130.1	13092.4	9827.63	11820.5	13083.3	10348.4	12704.5	12384.9	11830
NVLIVEDIIDTGK	P07335	Hypoxanthine-guanine phosphoribosyltransferase	31414.9	23991.9	22692.5	10267.9	27674.6	36613.9	19730.5	25287.7	29781	14742.1	32312.5	33454.6	16685.4	34830.4	40404.4	27393.4
FFADLLDYIK	P07335	Hypoxanthine-guanine phosphoribosyltransferase	8585	2808.6	7497.86	1552.81	8270.16	16882.8	5584.42	6316.86	8261.77	2476.98	12752.3	4608.32	3808.87	10748.3	N/A	6311.34
SVGYRPDFVGFEIPDK	P07335	Hypoxanthine-guanine phosphoribosyltransferase	17561.9	10709.4	8403.18	5367.49	18706.7	17551.2	8840.27	20321.5	9645.93	5648.1	17910.3	23041	9231.95	19726.8	21166.2	26883.8
TMQTLLSLVK	P07340	Hypoxanthine-guanine phosphoribosyltransferase	2727.99	2410.5	6735.01	3496.69	4118.28	3982.1	4079.36	2849.16	N/A	2738.22	8212.14	N/A	2469.1	9631.44	8833.43	5731.84
SIPMTVDFIR	P07340	Hypoxanthine-guanine phosphoribosyltransferase	N/A	3960.02	5178.52	4158.47	3869.72	4387.1	2573.1	5012.15	3263.97	3038.2	7450.1	4361.34	3227.75	4290.83	4770.84	5775.16
DETLYIFPSDFCR	P07340	Lysosome membrane protein 2	9997.8	4176.41	3671.65	1338.38	7203.15	8692.38	4205.76	5880.86	7372.19	2734.89	5593.61	4971.92	5024.86	7560.78	20364.9	6392.71
KLDDFVETGNIR	P07340	Lysosome membrane protein 2	N/A	2280.06	1174.19	2219.34	2674.1	1444.67	2996.54	2125.43	2328.93	3636.37	N/A	3078.25	2399.41	1906.06	1949.79	1764.43
TDPAALTDDEINR	P07340	C-1-tetrahydrofolate synthase, cytoplasmic	2455.34	2854.11	3528.52	2962.09	3990.82	3287.29	3225.23	3105.06	2876.38	3332.2	2762.32	2822.17	3454.64	2996.31	2702.68	2329.91
VLLSALDR	P07340	C-1-tetrahydrofolate synthase, cytoplasmic	6728.67	6274.55	5209.61	4479.48	6192.53	6128.06	5379.2	5474.73	5835.21	4049.29	6179.02	6399.02	5308.69	5981.35	6501.93	5049.15
YVVVTGITPTPLGEGK	P07632	C-1-tetrahydrofolate synthase, cytoplasmic	2918.12	2649.01	3210.96	1647.7	3084.89	3596.98	2698.65	3938.94	2515.4	2757.82	3130.24	2874.88	3155.46	3153.91	3417.78	3594.26
AYTEEDLDLVEK	P07632	C-1-tetrahydrofolate synthase, cytoplasmic	3359.18	N/A	1851.09	2162.31	N/A	2138.87	3271.41	3717.68	3734.53	2258.59	1884.83	N/A	2602.14	2204.71	2343.44	3210.95
ILQAVNFPFLVK	P07632	cAMP-dependent protein kinase catalytic subunit alpha	4769.9	1941.32	5799.51	1845.64	5164.18	7292.51	5440.14	3558.98	8942.22	2777.51	7362.94	3249.29	4600.94	6450.39	12467.9	6724.37
VAIEPGVPR	P07825	Sorbitol dehydrogenase	6205.87	4941.38	5148.09	4048.78	5197.75	5348.66	5382.11	4449.87	6236.37	5503.47	4851.31	5284.96	4530.37	4413.1	6600.17	4842.03
AELLFQGK	P07825	Hexokinase-2	49502.3	35436.4	51085.5	33492.9	44166.9	54284.4	38361.7	38854.6	44226.9	36943.9	45423.4	51458.8	39095.3	52780.9	44307.5	42172.7
NVELVDGEEGR	P07825	Hexokinase-2	30694.6	28753.6	33941.4	21015.8	29368	31361.2	23831.2	29326.9	28647.5	23009.1	29407	33388.8	27529.8	33760.4	29127.8	24158.2
STIGVDGSVYK	P07895	Hexokinase-2	32335.3	26237.1	33791	26158.4	30117.6	31916.3	25044.9	27721.7	30216	25652.9	29756.4	26536.6	26640.3	28976.6	26630.2	25186.2
VTVGVDGTLYK	P07943	Hexokinase-2	23313.6	21846.7	28430.5	22397.4	25860.6	26801.4	24114.1	29199.3	23597	21797.1	30381	27804.6	23660.5	27250.9	23071.6	22821.2
CDVSFLESEDGSGK	P07943	Hexokinase-2	4181.14	3793.37	4607.46	3766.13	5854.15	5273.29	3521.58	4659.45	2178.08	3570.61	4748.39	5060.69	4476.71	6011.96	5268.82	4090.29
TVFDVAVDELSLNPGK	P07943	Hexokinase-2	20020.2	8347.18	11174.8	4140.68	16096.7	20857.5	9742.15	15169	27509.1	5712.5	15876.3	17869.6	9418.24	20851.5	40738.6	12829.6
LSHEQLLEVK	P07943	Hexokinase-2	N/A	1609.2	2754.47	2049.24	1836.51	2737.02	1825.81	2166.3	1495.75	1955.63	2069.94	2470.93	2010.48	2034.89	1069.19	1569.2
GLGATTHPTAAVK	P07943	Hexokinase-2	862.136	1015.95	1179.69	639.225	989.911	1367.22	824.936	927.453	1072.04	927.606	1069.16	759.03	639.393	941.811	1355.86	815.094
DVSDIEEDKDGIEK	P08009	Hexokinase-2	2754.68	N/A	2216.39	3109.72	4319.96	3426.92	2640.28	2951.99	3819.65	2115.84	5416.55	5457.45	3479.63	2730.24	3142.36	2813.7
GAALITAVACR	P08461	Hexokinase-2	61658.4	45968.8	58474.1	45909.7	48188.4	59916.8	48526.8	49781.9	60389.7	42501.4	53004.8	58529	49213	61737.9	36684.1	42332.7
ASGCEGEDVVTLLK	P08461	Hexokinase-2	21724.5	13758.6	15444.5	10349.4	17514.8	18734.4	11989.5	16075.7	18694.1	12521.5	17562.7	19873.6	14338.3	22905	20808.2	18064.7
LSDETLLEISR	P08461	Hexokinase-2	11120	9936.17	11638.6	9082.37	9370.05	11096.6	9118.96	10188.5	8028.15	7662.43	9596.35	13900.1	9358.63	10525.7	4081.54	7593.66
LGLNPLQEDCVATHR	P08461	Hexokinase-2	13911	16383.3	18086.9	13680	11668.9	14900.8	14016.9	16302.1	13713	14194.8	16745.5	17308.8	14088	17657.3	13163.4	14388.5
AYQILMR	P08461	Hexokinase-2	4479.05	4785.98	7480.51	5857.96	7340.26	7560.71	2554.43	5164.87	3804.47	3860.68	9964.79	5221.62	5344.44	7726.99	4562.82	4483.37
LSPELLTTGSFETK	P08461	Hexokinase-2	16484.6	12440.1	13667.1	8716.43	12802.2	16684.4	9725.22	12695.5	14265.8	8366.78	14264.5	18481	11449.6	13958.4	14305.3	12784.5
STPDGTEHGEFLALDLGGTNFR	P08461	Hexokinase-2	6992.54	7035.95	4081.5	3759.03	6231.8	4421.07	3509.18	8251.41	3904.82	2844.46	2590.07	7491.33	3498.34	7707.24	N/A	4892.15
AAQLCGAGMAAVVDK	P08503	Hexokinase-2	3163.28	2452.86	5346.93	2443.58	4523.72	3837.49	1523.81	4867.78	1559.56	1567.21	7086.16	3898.96	3066.93	6458.36	1630.02	2271.87
HLGLESTCDDSIIVK	P08503	Hexokinase-2	N/A	1395.8	3258.28	3472.34	670.129	1467.75	2536.63	1282.19	N/A	2480.54	991.052	2257.46	3045.99	1276.18	N/A	1537.67
MLPTYVCATPDGTEK	P08503	Hexokinase-2	1595.2	1680.46	3043.77	2526.48	2199.6	2332.62	N/A	3740.84	N/A	1967.69	1881.46	1882.31	3288.02	3321.06	N/A	2012.09
LSIVPVR	P08503	40S ribosomal protein S2	36753	48464.5	34616.2	24540.3	35060.9	33764.8	23406.5	31203	28432.2	23763	38459.3	33253.2	26347	34311.2	31331.8	30160.9
GTGIVSAPVPK	P08503	40S ribosomal protein S2	35443.5	36287.5	32808.7	27712.4	32296.7	35280	26284.4	34168.3	35829.1	25963.3	35248.4	41163.3	29032.2	34163.7	31672	29870
GCTATLGNFAK	P08503	40S ribosomal protein S2	11716.1	11821.5	10670.3	8774.61	9974.25	11280.7	9030.39	12932.7	12277	10149.6	11822.5	12872.7	9249.68	12785.9	11058.1	10978.9
SLEEIYLFSLPIK	P09034	40S ribosomal protein S2	11800	3481.53	8065.01	1836.79	9649.57	18122	5902.46	9198	12254	2421.37	17829.8	9110.6	5239.8	7917.09	7621.06	8845.46
SPYQEFTDHLVK	P09034	40S ribosomal protein S2	1063.27	3506.58	3214.03	3291.22	2070.82	2218.37	3262.64	3663.85	2364.28	2862.91	3562.2	1907.39	2374.74	1945.27	1327.03	2590.92
AEDKEWIPVTK	P09034	40S ribosomal protein S2	2173.22	2469.74	3659.45	2660.45	1781.7	3291.71	2964.39	2034.49	2903.69	1897.3	N/A	1981.35	3532.71	N/A	2361.61	2260.03
AEITDAEGLGLK	P09034	Dynactin subunit 1	23768	18846.8	22370.8	17186.9	23972.2	22427.2	19607.3	23205.9	20903.7	15294.8	22197.2	27490.1	21047	27803.4	30776.8	21780.5
LEETQTLLR	P09034	Dynactin subunit 1	17566.8	18561.9	19573.9	14608.2	18986.5	18227.1	18333.6	16906.2	16108.7	14432.3	14662.1	21142.9	15168.6	20159.7	20785.3	17898.9
IKGEELSEANVR	P09117	Dynactin subunit 1	N/A	1808.92	2106.85	1217.48	2580.7	1971.3	1863.62	2024.3	1647.86	1784.56	2160.4	2829.14	1498.26	2018.3	2164.29	1918.6
VEAAQETVADYQQTIK	P09117	Dynactin subunit 1	2373.48	2391.85	2277.76	2288.06	1847.5	N/A	2054.73	2135.09	2028.86	3202.77	2316.1	2079.48	1965.98	3050.12	2996.24	2120.87
ASLAALPPLHVAK	P09117	Dynactin subunit 1	N/A	4394.38	6184.88	5935.88	6290.18	4582.16	6674.02	5836.46	7606.11	5146.78	4990.71	6327.16	6376.42	7130.02	6581.42	5730.44
GGTPGQAPGALPGPGPVK	P09117	Dynactin subunit 1	9821.72	8649.87	6721.36	5740.94	10130.4	8172.44	6291.11	9129.61	7224.95	5822.87	6651.24	13762.3	6560.79	13061.4	8452.7	10156.5
ASEQIYGSPSSSPYECLR	P09117	Dynactin subunit 1	4261.18	2342.28	1926.9	1820.49	N/A	2144.77	2173.56	2061.82	5145.68	1936.22	1523.64	2113.17	2063.95	2898.85	3082.3	3075.83
AESLQQEVEALK	P09117	Dynactin subunit 1	8784.11	9043.74	9616.73	6184.79	8961.29	10242.8	8891.17	8907.81	8555.62	7134.71	7120.52	11617.5	7549.14	14231.9	15814.5	9820.34
YEHALSQCSVDVYK	P09117	Dynactin subunit 1	1036.76	1139.79	2297.92	2788.25	2258.88	1383.23	2750.38	1819.94	1875.68	1622.14	2119.22	1638.04	2477.16	1941.97	1763.85	2574.03
GPPPSGIATLVSGIAGEEQQR	P09117	Dynactin subunit 1	10489.6	9022.36	8990.53	5655.42	11182.6	14124.7	9807.4	11974.3	15863	7423.67	11448.1	15570.9	10475.8	19136.7	29077.5	13604.3
DQLDETVNVEPLTK	P09117	Dynactin subunit 1	4909.34	4674.39	5440.57	3724.44	6413.65	6164.79	4782.07	7457.27	4650.43	4023.41	5993.97	7596.31	5431.03	6468.62	8287.04	7636.71
VDELTTDLEILK	P09117	Dynactin subunit 1	6045.99	4818.65	5044.78	3351.83	7160.71	5802.42	4695.56	5372.06	4118.09	4246.85	7051.4	8662.02	3812.92	7399.77	11453.3	5126.85
ETVTQRPGATVPTDFATFPSSAFLR	P09117	Dynactin subunit 1	5457.12	4612.62	4132.49	3154.24	4148.78	3192.64	6084.85	7232.96	5907.98	3587.99	6370.13	5395.74	5554.17	4267.99	8820.38	8211.95
QQQPPPETFDFK	P09117	Dynactin subunit 1	5806.17	5688.74	5040.07	6471.95	5736.83	6836.73	5606.16	4926.7	2442.28	5971.64	6075.46	7066.92	7357.44	5728.5	8187.12	6947.04
RVEAAQETVADYQQTIK	P09117	Dynactin subunit 1	851.485	1511.67	1988.95	2564.07	2749.7	2447.11	2408.75	1831.46	1501.65	1949.92	1597.63	993.041	2018.75	1616.41	1711.82	2177.7
GPGLYYVDDNGTR	P09117	Proteasome subunit beta type-8	3239.11	3704.78	2721.07	3640.76	N/A	3257.26	4122.35	3138.13	3047.26	3751.54	3831.4	3168.94	3485.74	3207.62	3775.92	3563.75
QVLLGDQIPK	P09117	Proteasome subunit beta type-6	4142.53	4976.56	4353.36	2849.52	3135.63	3261.3	3958.89	3886.62	4620.1	3686.64	3924	3707.95	3417.71	4856.5	4689.27	5596.29
LAAIQQSGVER	P09117	Proteasome subunit beta type-6	3088.81	3650.92	2815	2167.49	2311.66	2966.05	2601.74	2345.42	2319.23	2530.56	2662.63	3624.51	1815.73	1879.79	1877.32	2824.8
DAYSGGAVNLYHVR	P09456	Proteasome subunit beta type-5	2283.22	1585.11	1698.28	1784.26	1445.97	N/A	1894.54	2084.39	2740.36	2017.45	1854.16	1096.81	990.891	1474.2	930.412	1981.35
FQHGVIVAADSR	P09527	Proteasome subunit beta type-5	N/A	1573.78	1762.09	854.947	1424.34	N/A	1754.74	993.618	663.811	899.669	1390.49	1292.2	1352.68	1510.85	N/A	1525.96
GPGLYYVDSEGNR	P09527	Proteasome subunit beta type-5	3596.09	4216.05	3063.29	4196.12	N/A	3825.99	4233.36	3833.05	3656.58	4064.6	4237.95	3953.2	4023.03	3887.7	4451.89	4121.92
RGPGLYYVDSEGNR	P09527	Proteasome subunit beta type-5	1843.14	1877.71	1424.1	2647.9	N/A	1364.04	1897.1	1855.72	1518.85	2181.36	1624.11	N/A	2110.41	N/A	2096.91	2304.23
TSASIILR	P09527	T-complex protein 1 subunit alpha	82944.7	83854.4	107478	67828.9	104782	119007	70678.1	81745.5	57751.9	70955	124175	91268.7	76321.2	152011	99839.4	94697
EQLAIAEFAR	P09527	T-complex protein 1 subunit alpha	46637.3	40000.2	34234.4	22806.7	38243	39799.7	31464.6	34745.6	41788.6	25529.5	33923.6	40514.5	30778.6	36899.5	43540.9	39139.9
VLCELADLQDK	P09527	T-complex protein 1 subunit alpha	15437.1	14494.7	14443.8	10158.7	11476.3	17398.6	14577.4	13993.2	16957.1	11894.7	11516.9	17956	11728.9	17921.3	17226.3	13123.8
QAGVFEPTIVK	P09527	T-complex protein 1 subunit alpha	14753	11861.2	13673.9	8570.36	13710.7	14409.1	11237.8	11660.7	13117	9595.95	12387.5	13749.3	10960.5	12245	15281.2	13788.8
SLHDALCVVK	P09606	T-complex protein 1 subunit alpha	5735.39	6635.4	6023.47	6126.99	5159.18	8248.16	6200.56	5391.45	6154.8	5748.12	5729.64	5872.37	6739.29	5592.67	5098.12	7132.98
LGVQVVITDPEK	P09606	T-complex protein 1 subunit alpha	9390.07	8408.43	10412.2	6758.63	7473.68	8687.64	9706.05	9174.73	4566.46	7682.63	10359.3	9568.18	6499.85	8078.58	4066.37	8672.65
IACLDFSLQK	P09606	T-complex protein 1 subunit alpha	5702.85	7785.97	7098.33	5401.53	7371.62	7653.64	7549.49	5944.35	9785.81	6296.21	6199.45	6200.3	6640.45	6244.7	7015.77	7826.34
YPVNSVNILK	P09606	T-complex protein 1 subunit alpha	14773.8	10486.1	12363.9	8349.73	13000.4	13520.4	9622.5	10153.6	16061.8	9420.79	12720.8	11110.5	9730.82	14035.4	14147.8	15279.9
SLLVIPNTLAVNAAQDSTDLVAK	P09606	T-complex protein 1 subunit alpha	3810.47	1863.56	2857.28	1204.6	6058.84	4590.35	2831.92	2455.49	2138.71	1524.89	4830.58	3087.42	2487.36	2372.01	9465.57	5307.63
LLEVEHPAAK	P09606	T-complex protein 1 subunit alpha	2498.22	2110.82	2254.79	1622.91	2730.8	2657.27	2440.99	1451.62	2444.07	2323.15	2042.08	2533.04	1871.23	2752.21	2581.2	2764.77
SSLGPVGLDK	P09606	T-complex protein 1 subunit alpha	50630.5	55472.7	56527.9	43055.3	37430.9	57631.6	51843.5	50601.8	N/A	51270.3	48541.3	54732.8	48176.7	53651	53867.8	49493.1
IHPTSVISGYR	P09606	T-complex protein 1 subunit alpha	8771.84	7632.54	8212.14	7653.56	7917.86	7980.46	8217.46	7489.53	11789.1	7269.13	7924.44	6638.02	7877.73	4011.97	9433.9	10417.6
AFHNEAQVNPER	P09811	T-complex protein 1 subunit alpha	918.709	1034.6	2173.57	954.267	1129.86	1003.71	1066.76	684.817	1021.29	856.063	713.626	1640.44	659.162	933.805	666.444	1095.83
MEGPLSVFGDR	P09811	T-complex protein 1 subunit alpha	5959.4	1497.58	3546.66	940.293	26524.4	29693.8	3210.68	13590.8	6527.29	1020.92	18390	11777.9	4187.19	27696.3	40846.9	3923.54
YINENLIINTDELGR	P09811	T-complex protein 1 subunit alpha	9174.77	6283	3801.19	1911.82	5500.58	2717.89	4559.43	6867.84	6543.46	2508.94	2202.27	5247.21	3642.69	5403.84	6053.49	7583.92
FATEAAITILR	P09951	T-complex protein 1 subunit alpha	12256.2	10621.4	11526.6	9046.33	11940	12313.7	11324.9	11673	13789.7	10481.9	10567.1	11984.8	8839.92	14364.3	3548.74	12915.6
[truncated: 3,580 more rows]
