# Supplementary material for: Proteomic Analysis of Retinal Tissue in an S100B Autoimmune Glaucoma Model
Source: Biology (Basel). 2021 Dec 23;11(1):16. doi: 10.3390/biology11010016 (PMC8773367; doi:10.3390/biology11010016)
Supplement: Supplementary file 1 [file biology-11-00016-s001.zip › Table S3.xlsx]

## Sheet: table S3
Peptide Sequence	Protein Accession	Protein Description	[1] Control	[2] Control	[3] Control	[4] Control	[5] Control	[6] Control	[7] Control	[8] Control	[9] S100B	[10] S100B	[11] S100B	[12] S100B	[13] S100B	[14] S100B	[15] S100B	[16] S100B
GIEEVGIYR	A0A0G2JTR4	Active breakpoint cluster region-related protein	7103.97	N/A	N/A	5085.65	4309.16	5451.5	9110.04	4498.74	4556.73	4481.22	5117.85	6090.14	5357.81	5085.57	5266.19	N/A
GIQYLIER	A0A0G2JUG7	IQ motif and SEC7 domain-containing protein 1	4277	4061.44	4626.09	5339.6	3926.57	4893.98	3687.01	N/A	3634.29	4256.39	5833.29	N/A	3143.04	4427.7	4518.43	5552.77
LTSAVPGADIK	A0A0G2K2P5	IQ motif and SEC7 domain-containing protein 1	4292.61	4022.95	6048.46	7374.81	5292.69	8862.48	6017.46	4956.2	5970.24	4622.67	4886.52	5084.79	5866.85	5579.53	7536.37	6099.49
EGLEEGDQILR	A0JPJ7	Tight junction protein ZO-1	3385.36	2181.9	3697.96	3536.65	2726.08	3291.05	2859.98	2837.71	3448.69	2646.12	3783.08	3520.59	3324.77	3223.16	2698.28	2956.72
EEAVLFLLDLPK	A0JPP1	Tight junction protein ZO-1	338.546	1527.48	2520.77	1684.21	2130.29	1522.31	1086.82	777.618	1220.24	1650.71	1547.06	2903.78	N/A	1253.53	672.929	1078.16
EAGFLRPVTIFGPIADVAR	A1A5S1	Tight junction protein ZO-1	635.219	2277.41	5119.99	N/A	5530.43	N/A	2153.97	2634.27	2682.31	3653.36	2612.92	1987.88	1753.32	2539.03	2465.4	2924.63
IGIVGLPNVGK	A1L1K3	Obg-like ATPase 1	5623.12	15180.1	11130	12769.5	17216.6	14327.2	12078.9	10500.6	14579.4	14183.5	9998.49	13273.9	15692.8	13333	10697.6	13273.5
IPAFLNVVDIAGLVK	A2RUW1	Obg-like ATPase 1	245.094	3827.21	4282.19	3649.69	22169.5	5135.5	2067.88	1095.98	2162.4	4756.93	816.453	4699.1	8345.88	5017.1	1467.92	4462.5
AFEDDDITHVEGSVDPIR	A2VCX1	Obg-like ATPase 1	6875.64	6398.06	7830.5	8551.88	5846.81	8302.84	6926.27	7416.12	6857.75	6541.73	5890.76	6951.63	6995.2	6016.12	8034.95	7000.77
NYIVEDGDIIFFK	A4L9P7	Obg-like ATPase 1	3790.2	6490.18	6286.65	3424.27	5743.76	N/A	6085.78	6808.33	3864.48	5615.74	5238.05	8116.27	6028.74	7206.09	6726.45	7233.61
VAAAVPVIISR	A7VJC2	Dr1-associated corepressor	3322.38	2805.87	3019.71	3980.93	4288.44	N/A	3354.88	2635.29	3612.44	2926.23	2972.67	2863.34	4431.67	4159.22	3391.43	3950.25
AAVELEEPEDAR	B0BMW8	Pre-mRNA-processing factor 6	5832.66	2225.87	3814	3827.27	2565.29	4898.39	2111.26	3751.63	5756.92	1813.52	4220.92	4046.68	4594.47	4057.07	3486.93	3407.1
LTPVPDSFFAK	B0BN85	Pre-mRNA-processing factor 6	2503.38	2354.29	3688.8	3509.14	2063.17	3786.66	2109.34	2920.53	4453.38	1769.94	2824.13	3578.42	4302.8	3477.36	3221.45	3982.72
ESLEALLQR	B0BN86	Pre-mRNA-processing factor 6	2576.09	817.343	2234.29	1744.78	N/A	2746.38	1346.8	2087.08	3302.86	913.786	2926.74	1506.43	2157.02	2307.96	1504.31	1936.46
TGEGAVSLVER	B0BN93	Anaphase-promoting complex subunit 5	N/A	1267.79	2222.13	2212.01	2213.81	1676.57	2157.14	2481.04	N/A	1781.69	2504.36	1971.08	1404.03	2335.22	1939.6	1610.61
LSITVVQAK	B0BNA5	Toll-interacting protein	2200.84	3119.49	2906.34	3221.25	4704.74	3766.67	3103.6	2460.12	3122.53	4505.19	3191.85	1829.02	4156.58	5366	1708.6	3575.12
GPVYIGELPQDFLR	B0BND0	Toll-interacting protein	5166.07	8348.29	8207.83	9049.91	9345.41	10259	6511.83	6864.23	5592.45	6973.4	6633.56	10359.9	10346.6	9812.8	9339.31	9943.34
GTLLGESLK	B0BNE5	TIP41-like protein	3943.1	6584.54	5984.78	6608.68	7222.4	6698.36	6469.52	6789.85	6021.5	5683.44	6723.09	5369.49	6410.54	7724.1	7551.4	6666.93
IISVTPVK	B0BNF1	Sister chromatid cohesion protein PDS5 homolog A	3458.09	N/A	5609.27	4294.89	4417.44	2934.27	5565.43	4873.98	5225.61	4744.74	N/A	6716.8	7078.61	5058.99	5735.94	6072.21
EVQLAQIFEPLSR	B0BNG0	Sister chromatid cohesion protein PDS5 homolog A	1068.62	3283.79	3225.78	2289.46	2243.63	2714.52	N/A	2081.33	3950.35	2608.62	2686.45	3442.87	5742.24	2368.74	3312.74	3015.47
DLALVNDQLLGFVR	B0BNM1	Sister chromatid cohesion protein PDS5 homolog A	311.556	1628.56	2202.54	3106.86	N/A	3934.99	789.298	763.978	2482.83	2496.96	1447.31	2664.18	N/A	2637.64	1804.54	N/A
GFGFVTFDDHDPVDK	B0BNN3	Heterogeneous nuclear ribonucleoproteins A2/B1	19913.8	34167.9	28616.8	21457.3	18393.1	32120.1	19107	32624.6	42907.3	13660.8	42733.3	35927.1	15707	32086.4	40161.6	49106.1
TLETVPLER	B0K020	Heterogeneous nuclear ribonucleoproteins A2/B1	28370.1	32082.4	27655.6	31811.7	17873.7	42728.5	21171.5	33866.8	49357	16098.5	43419.4	34183	18005.9	29810	35747.5	46076.2
NYYEQWGK	B0LT89	Heterogeneous nuclear ribonucleoproteins A2/B1	12956.1	3062.74	928.994	N/A	N/A	3128.16	3909.67	3286.95	4293.87	675.649	5689.1	3356.79	N/A	N/A	2199.08	5146.54
LFIGGLSFETTEESLR	B1WC61	Heterogeneous nuclear ribonucleoproteins A2/B1	15931.1	44371.9	24683.2	15063.8	15127.9	15223.4	33426.1	64562.9	20810.2	20345.4	65741.8	50812.1	19840.8	40870.4	51035.9	81878.4
LTDCVVMR	B2GUZ5	Heterogeneous nuclear ribonucleoproteins A2/B1	3518.94	1877.5	3032.1	1738.43	N/A	5192.28	2316.68	3395.64	5202.41	1443.41	5012.29	4198.16	N/A	3525.14	3114.71	9019.89
IDTIEIITDR	B2GV06	Heterogeneous nuclear ribonucleoproteins A2/B1	139676	187015	229912	213602	123727	340819	214487	266238	303647	106430	329838	315364	108231	212607	293360	393427
GGGGNFGPGPGSNFR	B2GV22	Heterogeneous nuclear ribonucleoproteins A2/B1	149595	110226	145733	152798	82446.9	205747	99513.1	168975	207354	86742.3	255134	154368	77506.2	179885	238977	251814
NMGGPYGGGNYGPGGSGGSGGYGGR	B2GV54	Heterogeneous nuclear ribonucleoproteins A2/B1	1715.81	2387.91	4560.15	6479	2056.96	7615.99	2660.01	3512.24	8331.04	2274.16	5538.83	4090.71	1058.44	5701.15	3340.13	5178.93
NQVIAPLTEELVFR	B2RYG6	CAAX prenyl protease 2	1203.18	2399.05	2583.4	2405.02	2905.78	2034.46	2267.76	1813.21	2078.07	1758.25	2214.71	2986.11	1716.16	1132.04	2713.08	2313.25
DYASALETFAEGQK	B2RYW9	Protein SGT1 homolog	736.248	1379.67	1409.66	724.144	640.821	1656.3	566.987	1077.58	528.156	1061.34	1046.93	N/A	772.314	1113.96	826.36	817.674
SLELNPNNSTALLR	B2RZ37	Protein SGT1 homolog	2376.43	3880.06	5711.03	N/A	4133.04	N/A	4342.8	7347.72	3264.39	4235.73	5409.02	N/A	3733.82	4605.56	6349.97	N/A
YIVIEPTR	B2RZ78	Transmembrane protein 11, mitochondrial	2163.6	2787.45	2335.19	2225.44	2162.72	N/A	2847.96	2014.81	2411.83	2050.09	2691.12	2407.17	1510.79	1846.67	2699.92	2421.73
VLDLQQIK	B3GNI6	26S proteasome non-ATPase regulatory subunit 13	6921.18	7947.53	8040.93	7079.31	6649.47	5905.02	6650.68	7012.77	5348.16	6930.25	6915.49	6970.35	6580.6	6165.58	7339.22	7721.78
QLTFEEIAK	B4F777	26S proteasome non-ATPase regulatory subunit 13	2338	N/A	2931.14	2584.48	N/A	2458.18	2154.18	2436.2	1514.71	2321.86	2353.08	2268.67	1883.9	2373.18	2184.3	2128.75
LNIGDLQATK	B4F7E7	26S proteasome non-ATPase regulatory subunit 13	7137.32	6534.72	7527.07	7209.1	7708.33	6676.69	7354.84	6665.57	6440.47	7282.63	7116.01	8269.47	6620.19	7647.58	8955.91	6823.31
FLGCVDIK	B4F7E8	26S proteasome non-ATPase regulatory subunit 13	2745.48	N/A	3519.66	3774.49	3433.96	3287.24	3419.56	3430.57	2897.39	3559.49	3552.21	3567.48	N/A	3215.48	N/A	4034.29
ELEEDFIR	B5DEH2	Coactosin-like protein	7214.61	9201.55	9286.8	7751.19	7215.72	6415.35	7130.45	8167.36	5781.95	5827.86	7493.21	9124.23	6204.88	9494.95	7934.95	10334.7
KELEEDFIR	B5DF89	Coactosin-like protein	1815.44	2371.68	2697.1	1525.82	2080.69	N/A	N/A	1480.17	1285.08	1839.31	1514.05	1748.12	1200.26	809.964	N/A	2346.87
YISLDDLQQVK	B5DF91	Glycerophosphocholine cholinephosphodiesterase ENPP6	2982.67	N/A	2765.25	3252.97	1735.32	3624.57	2747.36	N/A	4181.87	1903.12	3247.93	3034.42	N/A	2413.09	3659.49	N/A
AYDATCLVK	B5DFC8	S-formylglutathione hydrolase	20503.8	20585.3	20281.5	18438.6	19729.6	19071.9	19240.3	21866.6	16889.4	15590.9	20398	21542	21497.8	20036.2	21531.1	23698.6
KIPVVFR	B5DFN2	S-formylglutathione hydrolase	N/A	27514.5	8676.8	16242.5	15126.5	12255.6	16500.8	14677.5	13167.7	13116.3	12055.2	N/A	17397.5	16208.8	10102.3	18499.5
VFEHSSVELK	D2XV59	S-formylglutathione hydrolase	522.644	813.332	796.149	809.344	810.281	371.427	523.637	991.831	769.908	670.856	790.081	843.812	741.855	1150.05	1021.96	734.903
FAIYLPPQAESAK	D3Z8L7	S-formylglutathione hydrolase	18846.1	23861.7	23940.1	24259.4	24480.9	23264.4	21881	20571.5	21084.4	18983.2	23374.8	21493.4	24737.3	24234	22054.5	26070.8
SGCQQAASEHGLVVIAPDTSPR	D3ZAA9	S-formylglutathione hydrolase	18106.7	11735.3	11343.7	10034.4	11032.9	6357.3	9811.48	12912.2	10353.7	8982.48	12781.7	12559.6	9568.89	11433.5	12716.9	12931.8
MYSYVTEELPQLINANFPVDPQR	D3ZAF6	S-formylglutathione hydrolase	840.925	6830.83	8765	7938.28	9200.35	6654.05	4393.02	3519.96	5768.84	5013.42	4825.81	6479.9	4030.71	5149.56	5785.28	6152.51
EFLSELQR	D3ZD32	Septin-8	8051.69	10590.7	8772.33	8576.67	9137.49	7539.16	9546.81	10034.7	8013.61	9181.35	9224.91	10968.7	9923.3	9157.51	10940.3	10086.4
ELEEETNAFNCR	D3ZDK7	Septin-8	3149.98	1904.61	1283.64	1500.75	1226.38	934.561	2114.26	2149.34	1365	1837.17	1861.25	1882.77	1632.16	1678.7	1206.37	1584.26
DDLALFCLQELR	D3ZFD0	ER membrane protein complex subunit 2	727.294	1280	2434.61	N/A	1068.47	1887.62	1727.12	1136.95	1123.56	1688.38	1289.26	2278.93	N/A	1691.29	2239.08	2071.34
GNPSGIQPDLLISLTAPK	D3ZHA0	NAD(P)H-hydrate epimerase	4661.4	8621.24	3559.52	9438.25	8972.01	11295.6	4061.17	6685.7	5793.52	6005.52	5379.37	9024.87	8568.16	8035.09	8158.92	7595.25
ESISLSPEQLAQLR	D3ZHV2	Carbonic anhydrase 1	2038.39	6246.21	6288.88	4270.27	4932.6	8864.07	4692.33	4156.39	3309.56	4897	3025.4	8464.57	N/A	3901.73	4857.43	10594.9
AMVNLQIQK	D3ZKD3	CDGSH iron-sulfur domain-containing protein 1	1337.94	7039.87	7482.37	8400.97	7908.2	7848.21	N/A	5509.81	7023.13	6827.82	4661.05	4203.27	7292.44	7852.57	N/A	6986.44
HNEETGDNVGPLIIK	D3ZLZ7	CDGSH iron-sulfur domain-containing protein 1	18336.8	19943.8	16366.1	17973	17094.5	15852.8	15623.4	17404.2	12092.5	15007.7	16351.3	14758.4	14056.6	18157.5	17362.7	22128.3
VVHAFDMEDLGDK	D3ZQG6	CDGSH iron-sulfur domain-containing protein 1	1367.9	2322.08	3829.07	8217.94	5474.31	4695.76	4250.14	1692.98	4232.76	3507.48	1307.14	2492.64	1416.06	2496.53	1422.05	3124.75
LADFGVAGQLTDTQIK	D3ZQL7	Serine/threonine-protein kinase 24	1122.84	1360.72	978.647	1590.34	1267.01	1634.98	1759.08	1850.89	N/A	1163.3	1814.25	1309.03	766.038	1195.98	N/A	1177.42
GIILVGNEEQK	D3ZRC4	Complex I assembly factor ACAD9, mitochondrial	14736	10778.5	10996.5	9600.41	11214	11316.3	13436.3	12123.3	12570.8	12369.4	11223	12902.6	11787.8	10533.4	11508.9	13654.9
FFNEEVDSR	D3ZS28	Complex I assembly factor ACAD9, mitochondrial	7001.11	7643.4	6154.65	7258.83	7343.18	6899.09	8249.51	9744.67	7086.99	6926.42	7782.2	7974.44	5733.1	7506.42	6617.72	7164.96
YAPENLDEQIK	D3ZTX0	Complex I assembly factor ACAD9, mitochondrial	11283.3	6440.31	13136.3	13089.4	7603.59	14560.8	20563.8	10409.9	9014.68	13272.7	10193.5	10213.1	9737.84	10301	8760.72	9377.12
VPVENVLGEVGGGFK	D3ZW55	Complex I assembly factor ACAD9, mitochondrial	1459.86	4810.06	2771.56	3363.54	3736.32	4504.94	3131.99	3124.98	3054	2552.57	2567.44	7009.42	6318.38	2333.11	3535.8	5662.72
NLSEFGLIQEK	D3ZXK7	Complex I assembly factor ACAD9, mitochondrial	3719.57	3372.79	3057.06	3751.65	3277.93	4572.22	N/A	3802.38	4166.49	3536.37	N/A	3986.96	3820.85	3864.08	3810.43	4082.95
LIEQTAEYACTR	D3ZZX1	Complex I assembly factor ACAD9, mitochondrial	6274.62	4170.96	3209.47	3460.98	3567.1	4471.09	5391.07	3588.81	2151.04	3918.76	4136.62	3581.14	4219.65	4095.59	5572.06	3815.21
LEENVHYFGR	D4A2Z8	Complex I assembly factor ACAD9, mitochondrial	3099.04	1615.85	1555.65	1821.18	1985.08	2296.01	1187.71	1577.83	1664.02	1902.52	1497.86	1918.63	N/A	1778.62	1762.31	1914.29
EASDPQPEDVDGGLK	D4A4T9	F-actin-capping protein subunit alpha-1	3850.29	2981.39	2722.21	2494.82	2597.06	3390.67	2098.13	2472.34	2266.74	2392.59	3426.97	2878.54	2397.78	3316.69	2546	2570.77
DVQDSVTVSNEVQTAK	D4A631	F-actin-capping protein subunit alpha-1	3452.89	4435.23	3199.42	3020.31	2864.32	2789.63	3856.86	4303.44	1896.34	2676.39	3601.61	2999.85	3269.46	2487	4221.39	3722.63
FTITPPTAQVVGVLK	D4ABY2	F-actin-capping protein subunit alpha-1	3489.14	6078.58	3042.93	5266.39	5664.88	7275.89	2371.38	3353.62	4614.07	4023.57	2882.45	N/A	6261.51	5379.88	3532.37	4171.66
FYTDPVEAVK	E9PSK7	Succinyl-CoA:3-ketoacid coenzyme A transferase 1, mitochondrial	20149.3	19717.2	17038.8	18236.7	20569.5	23537.8	22996.3	23203.1	19888.4	17537.5	20490.6	23327.6	22219.6	20331.3	20063	22766
AGGAGVPAFYTSTGYGTLVQEGGSPIK	E9PTT0	Succinyl-CoA:3-ketoacid coenzyme A transferase 1, mitochondrial	8322.45	7924.45	10163.3	12896.3	15903.8	23108.1	9441.28	12652.6	11038	11235.9	9611.74	12670.5	15191.2	11797.5	10112.7	11112.7
CTLPLTGK	E9PU28	Succinyl-CoA:3-ketoacid coenzyme A transferase 1, mitochondrial	8829.05	9372.95	7495.95	6601.44	9769.69	9141.36	8610.29	9807.01	8621.42	8249.21	9148.17	10769.9	10128.8	10249.3	7313.68	8708.5
DLTAVSNNAGVDNFGLGLLLR	F1LMZ8	Succinyl-CoA:3-ketoacid coenzyme A transferase 1, mitochondrial	181.132	1486.15	1845.32	3532.49	1328.36	2188.97	778.425	735.65	1297.81	3176.95	701.757	1231.52	1569.09	1026.59	843.782	1246.33
MISSYVGENAEFER	F1LNJ2	Succinyl-CoA:3-ketoacid coenzyme A transferase 1, mitochondrial	8334.26	12683.3	10391.3	8266.14	14799.8	9197.71	11474.7	10691.6	8911.86	10802	7010.15	8894.72	7937.28	11848.8	8069.01	10148.4
LGVPLPER	F1LP90	Phosphatidylserine synthase 2	9356.23	10132.5	10947.6	11686.3	11514.7	13681.4	10331.3	12422.8	11980	9384.45	12741.3	14524.9	15644.3	12590.5	12666.2	14223.5
VAGGSGSESPLLEGR	F1LQ48	Phosphatidylserine synthase 2	4722.16	3208.29	3057.85	3181.78	2379.68	2738.17	3003.89	3333.4	2407.48	2283.12	3860.86	3310.94	2661.46	3445.01	3202.58	2418.91
VTDTDFDGVEVR	F1LQX4	Neutral cholesterol ester hydrolase 1	5545.5	4229.1	4099.06	4440.25	4661.88	4810.15	6022.35	5791.94	4586.89	4338.21	4185.83	6219.13	5906.48	5816.55	5013.56	4813.63
VGVSGDSAGGNLAAALGQQFTYVESLK	F1LU71	Neutral cholesterol ester hydrolase 1	968.912	879.13	992.713	1005.03	N/A	N/A	1255.2	1460.36	977.49	1309.72	1390.86	869.949	886.015	1398.58	1677.84	1324.81
NYKPVLQTIGDAR	F1M0Z1	Neutral cholesterol ester hydrolase 1	2767.4	2043.19	1350.6	1376.4	1457.78	N/A	1896.33	N/A	883.965	2222.05	1882.61	1026.38	1842.31	1193.31	1823.34	964.583
LLTSGYLQR	F1M3G7	Ubiquitin thioesterase OTUB1	11814.2	19759.3	19056.2	16221.3	17312	19453.5	15919.2	21087.8	14305.3	17762.1	19069.6	17511.8	20509.7	16734.7	19021.3	21122.4
IQQEIAVQNPLVSER	F1M4A4	Ubiquitin thioesterase OTUB1	4237.9	6335.85	2253.24	1686.39	2266.86	5714.52	3912.41	4424.23	2268.07	1999.24	4752.02	5850.84	2200.67	4506.68	2562.91	5287.97
GEGGTTNPHVFPEGSEPK	F1M7Y5	Ubiquitin thioesterase OTUB1	2029.27	1523.1	1840.51	1790.67	1728.56	1450.19	1031.41	1824.72	1073.07	1626.61	1861.08	1523.92	1291.91	1398.14	1092.71	1947.63
TFDTFCPLGPALVTK	F1MA98	Fumarylacetoacetate hydrolase domain-containing protein 2	1890.92	5897.34	5017.55	5911.93	6526.63	6922.17	4114.45	4873.97	4258.46	4856	4584.96	5673.82	6903.26	5241.28	4768.83	4153.38
NPIIFSK	F1MAB7	Fumarylacetoacetate hydrolase domain-containing protein 2	4603	4528.9	4683.46	4487.94	4595.47	3473.54	4058.23	N/A	N/A	4647.44	4573.04	4664.54	N/A	4781.23	4862.08	5197.47
FSSSIVGPYDSIILPPESK	G3V6S8	Fumarylacetoacetate hydrolase domain-containing protein 2	2152.08	5986.17	3226.56	4721.46	4794.48	6423.91	3080.01	3445.81	2737.55	3003.57	3820.72	5489.68	6014.42	4365.29	5270.99	5739.07
ALAAQLPLIPR	G3V7P1	Fumarylacetoacetate hydrolase domain-containing protein 2	4498.6	7401.56	7032.51	7923.86	9452.61	9575.97	6155	7747.79	7109.77	5800.93	6290.99	6906.13	7963.99	7175.17	6491.55	7851.51
ATVNLLGDEK	G3V928	Receptor expression-enhancing protein 5	6554.98	8294.04	8724.29	11448	8572.96	9378.18	10592.4	7415.46	5667.85	8502.79	7063.37	8340.09	8862.34	8414.86	11260.1	10333.9
VVTVGQFK	G3V9R8	Vacuolar protein sorting-associated protein 29	8136.75	9517.24	10696.6	8948.27	10632.6	9419.94	10725.1	10881.1	9720.86	9458.77	9687.6	10744.6	10287.9	9864.89	10265.3	12851.1
TLAGDVHIVR	M0R4F8	Vacuolar protein sorting-associated protein 29	6340.91	2610.67	3968.01	3808.82	3978.02	3295.62	3871.75	3639.22	3533.14	2197.38	2557.43	3887.39	2815.36	4396.25	3363.84	3177.64
GDFDESLNYPEQK	M0RC99	Vacuolar protein sorting-associated protein 29	6339.9	4584.54	3833.21	3001.6	2990.29	2991.45	4104.89	3324.85	2201.59	2689.15	4049.08	4602.74	3595.26	3452.41	5061.82	4067.46
ELEEEVSNFQK	O08557	Septin-11	14790.4	15471.4	16619.1	14195.3	16886.6	16839.9	18009.9	16486.1	15943.8	17591.4	17187.5	18909.4	14908.6	15108.2	17202.9	17014.2
SYELQESNVR	O08618	Septin-11	10029.4	7697.5	7751.69	7258.31	8242.82	10037.1	9348.41	9532.16	6703	6952.22	7245.55	11261.7	9255.08	7823.86	8960.49	9285.61
RNEFLGELQK	O08629	Septin-11	9666.33	14820	14564.4	15113.9	14452	13155.9	13539.1	14294.6	13361.6	15983.4	13694.1	15117.7	14944.2	16979.7	13278.8	15978.1
NEFLGELQK	O08651	Septin-11	5921.74	3855.81	4332.55	3865.92	4152.46	3202.41	4678.75	3889.87	N/A	4327.34	3979	5716.75	N/A	3523.32	4967.89	3425.81
AAAQLLQSQAQQSGAQQTK	O08662	Septin-11	4771.23	2987.35	5127.38	6042.96	5747.9	7355.16	6407.72	6372.12	2640.6	6008.83	6292.6	8152.51	7047.12	3494.94	8941.35	7902.21
DTDPDSKPFSLQETYEAK	O08700	Septin-11	10025.6	6460.99	7965.39	7862.93	8576.17	7513.5	8892	8645.24	6243.49	6997.32	8219.86	8802.76	7975.71	6502.15	7430.76	7070.76
LTIVDTVGFGDQINK	O08730	Septin-11	4973.43	6252.86	5625.85	5161.6	3804.8	4655.35	7801.84	7292.73	4044.67	4683.11	4751.79	5743.94	6002.21	5052.69	6308.42	5776.69
STLMDTLFNTK	O08815	Septin-11	900.323	3781.47	4195.43	6257.82	6600.53	4673.45	3556.87	2321.46	4615.42	4825.35	1753.61	2216.89	2924.6	3361.52	N/A	2894.16
IIEAPISK	O08816	High mobility group nucleosome-binding domain-containing protein 5	16013.6	13117.9	14738.7	11751.1	15816.2	15028.3	12563.6	17635.7	13456.7	11071.2	15448.4	22046.9	17203.9	14051.2	17941	17068.8
DAGATTIPETKPEVVK	O08837	High mobility group nucleosome-binding domain-containing protein 5	7375.94	11289.3	6391.17	6220.49	13660.8	7953.19	9720.03	9865.34	11548.2	10519.8	7764.78	11523.7	7879.06	6199.5	8529.04	7960.26
EKPDVAEIEDAK	O08838	High mobility group nucleosome-binding domain-containing protein 5	3162.41	1672.52	2402.34	1261.43	2454.85	2287.52	847.642	2431.72	1795.9	2053.18	2080.83	4797.99	3332.6	2805.8	2509.19	2328.26
ILEVEDLFSSLK	O08839	MAGUK p55 subfamily member 5	460.195	N/A	1173.29	N/A	1343.2	1175.41	798.04	351.257	1101.42	848.542	766.902	1148.42	N/A	737.454	765.534	879.182
VEGPAFTDAIR	O08873	Protein Niban 2	2577.69	3457.23	3542.05	3439.36	3864.11	3701.69	3165.7	4742.49	2662.12	3820.2	3702.66	4999.13	2842.79	2702.47	3094.56	2725.02
SVQTTLQTDEVK	O08875	Erlin-2	9590.14	8703.07	8984.83	8651.91	9219.28	9334.96	10402.6	9093.96	9814.59	7784.23	9797.95	12408.3	8735.47	8367.24	10587.5	11191.9
VTKPNIPEAIR	O09175	Erlin-2	6347.87	4449.85	4503.55	4185.75	4537.63	3360.9	4601.79	4738.04	3693.4	4005.7	4260.35	4404.84	4146.74	4507.15	4344.37	5589.43
VAQVAEITYGQK	O35052	Erlin-2	13847.8	13706.7	11745.5	11395.1	11607.4	13521.8	12488	13518.4	13196.9	5586.17	11932.2	14906.2	11687.3	11906.4	13997.4	14900.7
ISEIEDAAFLAR	O35095	Erlin-2	3288.1	7152.77	5108.48	4468.01	3687.63	5125.45	5322.7	5368.97	3146.81	3657.95	4595.51	6934.93	3563.43	4398.17	4708.59	5746.5
LGFGLEDEPLETATK	O35112	Erlin-2	2961.76	3471.1	4220.51	5001.62	4091.39	6462.31	4056.56	4639.21	4046.04	2734.05	4688.22	6446.85	4865.16	4037.78	4166.09	5005.26
IEEGHIGVYYR	O35142	Erlin-2	4460.16	5132.64	3978.4	3588.41	4339.92	3474.07	3434.4	3854.62	N/A	4052.36	4089.53	4016.85	4898.42	3869.19	4667.46	4420
LALQQDLTSMAPGLVIQAVR	O35162	Erlin-2	289.615	1862.68	3710.5	8254.63	3972.25	3003.43	1596.9	1779.8	2431.87	5455.34	688.325	1452.48	N/A	4180.74	2002.18	N/A
FLQESFNNDR	O35179	Cullin-3	8252.13	5246.25	5557.1	5525.52	6036.93	6677.5	6053.12	7683.26	6977.29	5112.2	6862.69	6810.57	6579.36	5279.59	6241.52	6689.14
SPEYLSLFIDDK	O35244	Cullin-3	2775.01	2743.99	3435.12	4156.93	2424.86	3744.9	4448.37	4334.47	4050.2	2449.67	3835.38	4440.08	3225.21	2518.38	4954.64	4646.66
EDGSEVGVGGAQVTGSNTR	O35263	Cullin-3	4757.19	2899.1	1634.12	1974.08	1872.8	2094.36	2159.13	2829.77	1569.81	1684.82	2173.16	2585.78	2635.01	1883.81	2668.5	2425.42
NNSGLSFEELYR	O35264	Cullin-3	4732.67	1548.49	2152.59	1577.04	1875.92	1776.03	1929.89	2201.06	N/A	1751.05	1892.86	1817.69	1993.94	1281.85	2342.43	N/A
EVVTEHLINK	O35303	Cullin-3	2006.73	2225.21	882.865	1480.8	870.902	1950.4	1201.77	1967	1035.7	858.495	1542.23	1529.62	2405.78	2271.81	2098.74	1072.79
GLTEQEVETILDK	O35331	Cullin-3	4253.82	2682.32	3918.31	3806.67	3692.71	4618.1	4471.02	2925.39	4263.63	3334.89	4175.78	5062.83	3147.7	4515.16	4369.03	4483.65
VLVDQTTGLSR	O35458	ELAV-like protein 1	21709.9	19314.5	23596.2	21956.7	14650.8	23976.5	14331.6	21635.9	25828.4	12276.2	26535.5	23436.9	19548.1	22919.3	25788.2	28141.1
ILQVSFK	O35476	ELAV-like protein 1	6761.46	7274.49	6662.39	9563.78	6576.38	10883.4	5181.37	6645.68	13871.1	5401.51	6603.14	3235.9	10145.4	9608.81	5273.08	8185.3
SLFSSIGEVESAK	O35509	ELAV-like protein 1	12607.3	15237	12312.3	13542.2	9748.47	17386.1	9549.45	14917.3	15558.6	7083.14	15391.8	16158	12793.6	14632.5	18543.2	19135.6
DANLYISGLPR	O35550	ELAV-like protein 1	6970.8	12422.4	10698.4	11412.4	8475.78	17768.7	7687.82	11545.5	14240.5	6489.17	11596.5	14156.1	11105.3	12168.1	13271.6	14736.9
GCILTLVER	O35567	Eukaryotic translation initiation factor 3 subunit C	5652.59	9166.87	8646.81	7637.86	8648.71	5946.1	7971.81	8836.6	8300.02	6041.85	8771.65	9904.53	10680	8067.57	8598.38	9385.19
ELLGQGLLLR	O35763	Eukaryotic translation initiation factor 3 subunit C	2445.87	4531.48	2679.25	3107.5	3693.11	3314.93	3131.04	2727.78	4101.45	2795.78	2974.73	4836.11	3693.21	3440.77	1816.8	3396.36
LNEILQVR	O35814	Eukaryotic translation initiation factor 3 subunit C	5134.84	3161.66	4413.96	3354.85	3910.28	3334.45	4444.8	3552.9	4267.83	3958.78	3933.67	3239.94	N/A	3502.37	4015.99	3488.3
DAHNALLDIQSSGR	O35821	Eukaryotic translation initiation factor 3 subunit C	10111.5	7008.55	7895.52	8075.04	7955.81	8011.45	5510.32	9909.34	8530.52	6829.66	8221.93	8214.29	7635.64	7184.94	6599.18	7115.99
GTTEEICQIYLR	O35824	Eukaryotic translation initiation factor 3 subunit C	6640.65	6052.7	5717.78	5212.09	4999.33	5745.47	7057.99	6766.13	5161.3	4973.13	7080.48	7143.24	6887.43	4786.58	7470.73	6587.96
GIVEESVTGVHR	O35828	S-adenosylhomocysteine hydrolase-like protein 1	18857.2	25716.6	19714.3	21082.2	20266.6	22155	22659.3	23532.3	23801.4	19972.9	18702.1	24481.7	22369.3	23401.7	25294.8	23038.2
VVLLAEGR	O35889	S-adenosylhomocysteine hydrolase-like protein 1	16424	24914.3	24207	24829.2	27802.4	26197.8	26966.6	26508.2	27044.8	24594.7	21295.8	25664.4	24588.1	23397.3	28508.5	24220.3
FDNLYCCR	O35910	S-adenosylhomocysteine hydrolase-like protein 1	19578.6	15442.7	14421	17429.1	15007	14161.2	18013.8	15905.3	13264.9	14888.4	15737.4	14697.1	15823.8	14924.6	17740.5	17169
QVVVCGYGEVGK	O35952	S-adenosylhomocysteine hydrolase-like protein 1	12502.6	9103.5	9827.77	8427.96	11016.1	9605.34	12535.5	12032.6	9491.09	10490.6	11059.9	10567.7	11540.2	10314.7	12088.8	11287.1
QDVYLLPK	O35964	S-adenosylhomocysteine hydrolase-like protein 1	2401.28	2106.3	2997.26	3027.94	2054.31	3812.21	2888.73	2080.92	2212.76	3617.59	2149.92	2281.4	2612.07	1795.56	2784.59	2776.35
TPELTWER	O35987	S-adenosylhomocysteine hydrolase-like protein 1	20124.4	8679.17	3205.54	N/A	N/A	5726.83	9209.25	5721.28	5740.22	2954.2	7881.17	5739.5	3278.16	5426.25	5765.82	8923.74
QVDVVITCTGNK	O54715	S-adenosylhomocysteine hydrolase-like protein 1	4195.45	N/A	2298.95	3061.72	2691.08	N/A	2910.72	3703.32	2741.87	2512.12	3202.46	N/A	2964.94	2375.73	3601.73	3368.98
YKQDVYLLPK	O54783	S-adenosylhomocysteine hydrolase-like protein 1	7337.38	4822.8	5147.39	4836.22	6475.05	4235.62	5146.75	3330.6	5101.4	4558.07	5361.42	2857.72	3284.86	3517.75	5358.64	3842.94
LCVPAMNVNDSVTK	O54861	S-adenosylhomocysteine hydrolase-like protein 1	3891.27	9791	10843.4	13246.9	15610.1	8882.25	10209.8	8070.74	12321.1	9663.32	5776.49	7362.67	9259.38	10131.1	7932.14	8984.46
EIEIAEQDMSALISLR	O54924	S-adenosylhomocysteine hydrolase-like protein 1	1088.47	1292.29	1647.01	2120.55	N/A	N/A	1290.85	1541.6	1351.59	1125.9	1201.59	1430.05	N/A	1461.69	1342.65	N/A
VGDNDFLEVR	O54975	GTP-binding protein 1	4289.7	2790.09	3407.13	3796.76	4517.95	3857.87	2913.16	3645.27	4538.55	3408.09	3393.32	3567.81	3306.65	3541.02	3504.95	2418.01
KIPVLVQSK	O55007	GTP-binding protein 1	2335.29	16247.8	13610.1	11531.8	13128.5	13020	11276	11796.6	10547.6	8943.54	13266.1	1143.83	N/A	12181.6	11806.9	12939
LVLVSPTSEQYDSLLR	O55096	GTP-binding protein 1	9070.43	19629.8	17539.2	21507.9	20268.7	24345.2	12435.5	14781.7	20584.3	15502.5	15340.1	23405.3	26200.1	17575.5	22762.7	18955.7
DDVIVTASNFSSER	O55156	GTP-binding protein 1	7144.82	8570.08	5491.52	6608.68	6205.06	9002.66	5793.66	6906.61	6810.36	4881.45	7964.93	9328.47	8845.62	7116.77	9030.14	6922.44
VITFIDLAGHEK	O55165	GTP-binding protein 1	1862.76	1064.18	1369.52	1043.76	2122.15	625.921	642.1	N/A	2215.36	1516.69	1413.81	N/A	1359.3	1575.72	1528.33	1521.02
LVVVGGGGVGK	O55171	Ras-related protein R-Ras	4980.69	7894.94	6842.5	5809.41	7153.8	4907.1	6667.4	5650.49	5848.99	7397.98	5531.56	5362.86	6037.34	7522.42	6819.54	6454.32
VEGGELVIAR	O70196	MAGUK p55 subfamily member 2	41423.3	39904.4	38918.4	38119.6	43473.2	43182.8	49096.8	49628.3	36681.5	43213.3	39498.3	53362.9	44636	41912.4	45101.3	44690.5
VCVLDVNPQAVK	O70199	MAGUK p55 subfamily member 2	28355.8	23417.3	29405.4	27946.5	29641.8	32643.3	33136.1	31790.5	24564.7	28748.7	29569.9	31185.2	32763.1	27312.8	32736	34365.7
ALQELLR	O70277	MAGUK p55 subfamily member 2	21405.7	21153.6	17889.5	20715.4	21874.2	24370	24455.7	25579.3	23001.7	20864.1	19360	23605.3	23739.6	20401.6	26144.9	20415
EGQGYSFVSR	O70351	MAGUK p55 subfamily member 2	26089.5	22359.9	18499.3	17601.8	20899.2	22756.9	22157.7	24132.7	18168.1	18756.4	21356.7	24757.6	23254.5	21170.7	27578.8	24360.7
YGTTVPYTSR	O70511	MAGUK p55 subfamily member 2	21473.1	20592.9	18272.7	19975.1	20737.4	21567.4	24098.9	26045.7	22994.9	19285.3	22238.4	26200.4	20766.6	21900.5	25497	25712.2
TAGEHLGVTFR	O70617	MAGUK p55 subfamily member 2	3931.11	4049.49	3711.89	3926.26	3710.72	3372.43	3914.34	3716.89	4069.89	3883.01	3719.01	3228.71	4408.92	4227.74	4196.26	3956.26
TAEFVPYVVFIEAPDFETLR	O88339	MAGUK p55 subfamily member 2	203.212	1341.84	5130.61	1558.66	N/A	N/A	3262.01	1113.18	3661.98	5507.36	2849.21	4996.45	1776.48	3494.74	4846.95	5432.96
DLAELAEQSSTAAELAR	O88377	MAGUK p55 subfamily member 2	7624.13	22235.7	7730.26	7254.97	9605.59	15842.1	9885.85	20223.6	6317.27	7426.54	13954.2	26781.8	21949.1	18341.1	12153.8	17698.1
LEETKLEAVR	O88453	MAGUK p55 subfamily member 2	16685.9	14630	7008.02	12251.9	13006.4	12264.2	6705.5	7558.33	11930.6	13674.3	12947.7	15223.4	12664.7	12622.7	13565.5	15454.1
DNNLELVQEILR	O88506	MAGUK p55 subfamily member 2	10657	18348.3	25694.5	29105.7	24369	47503	15896.2	16295.4	20182.6	12060	19946.5	36572.1	33918.1	20120.4	31072.3	25034.4
CHFDYDPAR	O88588	MAGUK p55 subfamily member 2	N/A	1139.97	N/A	985.481	851.043	825.092	1840.1	1021.75	N/A	1145.01	1679.71	1677.17	1053.32	1854.41	1502.56	1294.7
TLVLIGAQGVGR	O88600	MAGUK p55 subfamily member 2	18745.9	27645	19044.3	19958.9	29328.8	17156.6	25090.3	25319.6	21962.1	26025	16761.5	22258.8	29765.2	25863.3	23442.3	26381.1
GIMESPIVR	O88658	MAGUK p55 subfamily member 2	6282.09	20489.9	19423.3	20258.8	22258.4	16760.6	19234.3	13672	17268.2	18858.7	10052.2	17169.8	16132.1	19261.5	11596.1	14799.9
DLELTPTSGTLCGSLSGK	O88761	MAGUK p55 subfamily member 2	9893.09	9818.25	9394.17	14708	10489.5	20352.8	13972.4	11900.1	9391.83	10128.2	8923.15	16906.4	13078.4	10957.6	17759.6	14116.1
YLEHGEYEGNLYGTR	O88767	MAGUK p55 subfamily member 2	13084.7	8600.78	6872.08	7521.95	8812.43	8617.14	10314	8347.36	8045.16	8046.87	7391.34	9566.98	10561	8016.1	9586.2	9426.85
ILPSYQEPHLPR	O88775	MAGUK p55 subfamily member 2	10612.3	10933.2	9677.15	9241.48	11831.2	9656.5	11457.7	11807.7	9176.22	11457.1	10406.9	10450.2	9436.9	8188.75	9044.58	11221.7
DFTPSGIAGAFR	O88788	ATP synthase subunit f, mitochondrial	27508	52470.1	42608	46950.6	49676.2	62772.6	42580.4	45110.5	40577.7	30530.7	39417.3	65247.3	53250.1	50749.4	62499	59209.9
QELDDILK	O88794	Chromodomain-helicase-DNA-binding protein 5	2172.76	1200.15	2360.61	1984.29	1055.45	N/A	1511.44	1263.92	2591.21	1542.28	2418.5	1544.46	664.373	1663.06	N/A	N/A
VGGNIEVLGFNAR	O88808	Chromodomain-helicase-DNA-binding protein 5	7945.58	8329.07	8353.72	8203.73	6533.21	8006.58	6624.04	10581.8	9051.61	6466.8	9254	10400	13466.3	8891.57	12658.7	7682.1
ENEFSFEDNAIR	O88871	Chromodomain-helicase-DNA-binding protein 5	6538.85	4069.72	6059.43	4954.01	3394.12	5541.9	4176.32	5536.77	5336.8	4357.61	5362.14	6336.39	4952.06	5663.25	5570.24	4826.3
VLIFSQMTK	O88941	Chromodomain-helicase-DNA-binding protein 5	3075.05	5172.11	5314.75	6090	5041.58	4607.56	3943.6	3307.33	7779.13	6027.39	2932.49	4301.21	5502.98	5009.26	3080.2	N/A
LLEQALVIEEQLR	O88984	Chromodomain-helicase-DNA-binding protein 5	620.416	1665.34	820.548	859.099	N/A	N/A	810.871	1068.76	936.835	650.155	865.915	N/A	1422.39	717.042	681.801	N/A
HLCEPGADGAETFADGVPR	O88989	Chromodomain-helicase-DNA-binding protein 5	2900.64	N/A	1856.79	1201.4	928.566	N/A	1757.27	1442.33	2262.36	1857.34	1917.69	N/A	1577.31	2658.66	1768.84	N/A
GETAVPGAPETLR	O88994	Glycerol-3-phosphate phosphatase	12840.6	10456.4	11015.6	10178.8	8311.09	11497.1	9448.4	11562	8403.24	8481.58	11238.9	12036.1	11307.7	10978	10686.4	11543.9
TILTLTGVSSLEDVK	O89038	Glycerol-3-phosphate phosphatase	1867.74	793.377	1759.18	904.533	N/A	N/A	1256.66	1070	677.407	1215.89	1198.92	N/A	N/A	1142.87	1485.09	936.467
VLAISPEEQK	O89046	Unconventional myosin-XVIIIa	3759.16	2337.57	3682.42	3644.29	2573.14	3632.86	N/A	2990.25	3587.58	2951.12	3529.87	2493.39	2627.28	3253.97	4331.6	2431.99
LIALLEVLSQK	O89049	Filamin-C	565.576	2676.71	1981.9	1092.61	2698.96	N/A	1315.76	1555.52	1512.39	2520.31	N/A	N/A	1165.5	1163.85	227.197	1189.06
EQVDPLQVK	P00388	Microtubule-actin cross-linking factor 1	3696.82	4011.15	4113.08	4089.36	2911.24	4553.67	4393.93	5412.77	4879.83	3884.18	4734.06	6055.79	5055.64	5063.94	5813.93	2558.88
GVLVEEINTK	P00406	Microtubule-actin cross-linking factor 1	3586.67	5069.12	5779.15	4065.2	3115.04	5071.8	4873.41	6511.28	6433.32	5012.76	5835.4	9720.9	6973.4	5706.61	5910.31	N/A
LDNLLGEVR	P00507	Microtubule-actin cross-linking factor 1	2401.87	5265.58	6635.8	6167.74	3499.24	6735.89	7622.7	7953.3	7405.94	6049.63	7342.58	7472.24	6404.33	6357.11	7038.48	N/A
VYISELK	P00762	Microtubule-actin cross-linking factor 1	3573.55	2613.11	3069.54	3214.93	1744.88	3831.41	2608.47	4498.35	4027.68	2960.38	3702.77	4307.4	4600.57	2830.16	N/A	2512.8
DTQEIVHDLESPGIDPSIIK	P00787	Microtubule-actin cross-linking factor 1	661.984	965.477	1438.45	1581.96	N/A	N/A	1273.7	1541.28	1321.92	1074.88	1411.36	2181.02	1894.69	1448.58	1100.1	489.639
LSGQSAISTQPDAVK	P01026	Microtubule-actin cross-linking factor 1	1836.65	1758.93	2230.81	2024.57	1436.76	2083.73	1431.06	2750.07	2844.85	2437.99	2140.85	3121.2	2506.31	2241.23	1841.3	545.599
TELVAISSSEDEGSLR	P01041	Microtubule-actin cross-linking factor 1	1799.65	2101.81	2253.85	2311.5	1566.94	2355.38	2451.28	3011.25	2703.14	1638.56	2759.89	3278.33	1949.42	2204.83	N/A	2358.08
EVLQALDPQVDYLR	P01830	Microtubule-actin cross-linking factor 1	1086.44	1751.95	1708.46	1940.58	N/A	1699.57	1481.98	1655.94	1427.64	1408.34	1542.87	3454.34	2306.8	2375.21	1782.55	N/A
VDEIDAAIQR	P01946	Microtubule-actin cross-linking factor 1	3338.12	5282.05	5006.73	4792.14	N/A	4170.88	4852.71	N/A	4955.27	3901.88	5215.64	5768.79	4707.82	3846.73	N/A	N/A
EAAAAAAAAVAAAAAAAAAAEPYPVSGTTK	P02091	RNA demethylase ALKBH5	287.309	1258.37	N/A	2055.35	2570.64	N/A	506.903	406.162	1048.71	1206.33	684.134	N/A	1695.93	1211.45	1281.26	N/A
LVGIVTSR	P02523	Inosine-5'-monophosphate dehydrogenase 1	133240	188403	176212	169316	198970	159733	189731	188308	214416	179980	173504	194763	222270	189973	227430	205291
QLLCGAAVGTR	P02524	Inosine-5'-monophosphate dehydrogenase 1	77771	95238.4	81539.2	82763	83212.4	80263.8	91081.5	95832.4	76782.3	86812.2	89853	90043.8	88006.9	86721.6	104566	92824.7
LPIVNDQDELVAIIAR	P02650	Inosine-5'-monophosphate dehydrogenase 1	10700.4	20441.4	26536.6	29367.9	60895	35938.2	18489.6	16201.1	25592.2	27401	16595.5	43358.4	33325.8	26413.7	29653.4	28071.5
FEQGFITDPVVLSPSHTVGDVLEAK	P02696	Inosine-5'-monophosphate dehydrogenase 1	8335.42	9217.77	11774.3	9057.71	10307.4	7292.48	9072.09	10844.3	10361.1	9065.19	12120.4	16335.5	10513.2	11160.6	16123.6	14261.9
IAQGVSGSIQDK	P02770	Inosine-5'-monophosphate dehydrogenase 1	39530.2	28819.1	1222.66	1881.84	3150.73	6707.61	4632.04	3777.59	4664.33	4089.27	3804.12	4798.76	10313.1	2229.69	7457.79	2300.5
FGVPVIADGGIQTVGHVVK	P03889	Inosine-5'-monophosphate dehydrogenase 1	5481.85	19058.3	13866.5	20375.7	21831.1	19444.1	16085.5	17571.6	24121.5	17996.5	14385.1	19011.8	27390.4	20889.7	22228.5	20041.3
NLIDAGVDGLR	P04041	Inosine-5'-monophosphate dehydrogenase 1	122342	182298	120752	138962	142405	158994	145928	176233	145376	124940	148023	199420	160676	141088	184937	164600
IELVVAPAGVTLK	P04177	Inosine-5'-monophosphate dehydrogenase 1	88700.4	117981	84491.2	157725	131197	204457	92210.9	99853.5	164243	96141.3	70343.7	111101	158111	127382	112203	108204
DIDFLAEK	P04182	Inosine-5'-monophosphate dehydrogenase 1	59261.5	58699.5	61297.8	72110.3	68075.9	94835.9	79439.5	78113.4	75935.8	53052.2	70263.9	101281	84284.2	77425.1	95758.7	91808.9
YPHLQVIGGNVVTAAQAK	P04256	Inosine-5'-monophosphate dehydrogenase 1	21133.1	26458.1	16562.9	24686.7	29026.7	19326.7	17704.2	23141.7	27736.1	30887.1	18423.4	14079	32285.3	30608.1	19894.4	20584.2
DHTTLLSEVMTPR	P04636	Inosine-5'-monophosphate dehydrogenase 1	7107.44	24948.5	68966	44096.3	59878.4	71069.2	70711.4	22169.9	41751.4	37203.9	21643.1	73833.8	36198.7	37036.4	28663.3	59177.4
GKLPIVNDQDELVAIIAR	P04642	Inosine-5'-monophosphate dehydrogenase 1	22411.1	21822.5	21638.3	14220.9	27842.3	8590.78	24939.5	28949.4	25316.4	18485.9	24103.1	33145.8	27818.4	25628.6	26610.4	28443.2
IQHGFSGIPITATGTMGSK	P04644	Inosine-5'-monophosphate dehydrogenase 1	11531.6	39901.2	35362.3	44874.7	63194.8	35053.4	33957.5	31934.5	54521	22997.9	13200.1	28747.8	37715.4	25291	14923.3	32191.5
KFEQGFITDPVVLSPSHTVGDVLEAK	P04646	Inosine-5'-monophosphate dehydrogenase 1	3740.2	3787.6	4234	1634.68	4133.65	N/A	5358.67	3506.79	2892.02	5607.75	5113.92	N/A	1933.7	4042.41	2309.57	N/A
GEFTNLQGVAASTSGK	P04762	Tripartite motif-containing protein 2	3608.29	2701.67	2710.12	3224.25	2836.97	2273.98	2501	2716.23	3207.03	2339.52	3186.19	2768.22	3720.57	2924.11	3259.03	2235.63
ENPIEDDLIFR	P04764	Tripartite motif-containing protein 2	1728.27	3062.02	3301.68	3472.44	3480.18	3785.08	2710.36	2736.14	3581.39	2581.04	2569.34	4355.59	3903.45	3339.8	2300.94	N/A
VDLVDESGYVPGYK	P04785	Tubulin polymerization-promoting protein	6901.97	8121.94	8497.46	13846	10589.4	18290.2	10834.9	8649.96	5064.19	7920.68	7965.04	10376.3	14054.6	8573.92	17592.7	11936.8
LSLESEGANEGAAAAPELSALEEAFR	P04797	Tubulin polymerization-promoting protein	926.722	1523.83	1435.83	2181.17	N/A	1992.95	1658.77	1794.95	N/A	1037.66	1546.97	1599.93	N/A	1398.34	2560.47	1547.82
NVTVTDVDIVFSK	P04897	Tubulin polymerization-promoting protein	2962.6	3673.08	3670.82	2259.75	2253.6	N/A	4630.24	4355.78	1620.06	2285.18	3106.6	3029.1	2403	2795.38	4809.45	3340.1
GVVALQTLR	P04904	Calcium-independent phospholipase A2-gamma	2845.2	2397.99	2695.4	2915.25	3161.63	2794.98	3607.35	2509.11	2811.92	2971.77	2772.91	1771.45	3677.57	3388.18	3391.24	3328.17
VAAVSTIVNR	P04905	Calcium-independent phospholipase A2-gamma	3822.58	3940.12	4041.92	3664.77	4613.59	N/A	4357.12	4008.67	3117.11	3531.06	3650.52	4366.02	3577.93	3999.77	3807.09	3593.87
VIEVVIR	P04906	Retinoblastoma-like protein 1	5421.09	5511.62	3999.83	4258.87	4074.4	4925.9	2493.86	6311.36	7961.21	3878.98	5372.26	7648.1	6212.47	5802.76	N/A	4810.72
SVIDYQTHFR	P05065	Transmembrane emp24 domain-containing protein 7	1639.69	2268.39	1832.26	1589.37	2341.29	916.871	1935.28	788.365	1153.93	1665.93	1959.88	1154.89	N/A	1727.56	916.725	1549.21
IVFVTGNAK	P05197	Inosine triphosphate pyrophosphatase	791.157	10187.3	8676.31	7477.53	9081.16	7283.92	8681.84	7833.43	6648.09	7745.08	6870.41	5664.6	6273.98	5327.11	N/A	6301.71
LAAILAK	P05369	E3 ubiquitin-protein ligase RNF123	4812.42	2395.33	2456.5	2076.21	2078.3	2292.51	1926.83	2342.45	2545.49	2155.55	2334.07	2853.23	2817.85	2522.58	2614.44	2660.28
ALGYVLDR	P05370	Inositol polyphosphate-5-phosphatase A	4332.73	N/A	6313.62	8126.58	8347.24	6795.94	8230.12	7517.41	7410.9	7756.57	7367.08	9469.39	8299.45	7798.14	8312.81	8244.99
DPKANINSDNEK	P05426	ATP-dependent DNA/RNA helicase DHX36	3796.82	5819.15	4157.14	10571.8	5766.81	10374.8	5768.71	7688.93	N/A	4884.03	5564.06	7758.99	5831.26	3275.96	8493.2	3460.04
TTDFSDFLSIVGCTK	P05506	Cysteine and histidine-rich domain-containing protein 1	240.779	430.03	626.98	784.507	N/A	N/A	310.112	658.465	375.154	780.209	664.51	N/A	717.933	684.721	710.182	789.5
DFVSALR	P05508	Brefeldin A-inhibited guanine nucleotide-exchange protein 1	3212.67	1315.49	1750.63	1421.48	1148.69	1072.17	N/A	1599.8	2247.76	2362.83	1274.26	1533.81	1784.8	2132.77	1802.67	N/A
IFNETPINPR	P05696	Coatomer subunit gamma-2	7076.74	6891.87	7512.98	7846.08	9421.66	7547.31	8385.95	8829.13	8438.61	6878.8	7324.75	10104.6	7777.24	7761.31	7975.7	7565.53
AIVDCIISIVEENPESK	P05708	Coatomer subunit gamma-2	347.218	N/A	933.094	1270.45	1030.59	1967.67	876.762	686.743	707.793	1060.5	733.399	1697.79	1375.44	931.242	1131.73	975.911
SEITLVTPKPEK	P05712	Coatomer subunit gamma-2	2894.56	1836.22	2298.34	1797.07	1575.68	2612.93	2195.28	1183.6	3295.88	1841.32	1343.76	2859.88	2506.24	1692.32	2225.07	2073.45
VSGLAGSIYR	P06214	C-Jun-amino-terminal kinase-interacting protein 3	4250.46	2940.14	3221.83	4715.74	3051.85	3383.74	4855.18	3447.78	1905.74	4046.77	2485.18	3425.6	5876.91	2987.5	4750.71	2554.4
ELVEAGYDVR	P06238	Palmitoyltransferase ZDHHC17	4283.12	4172.86	3414.67	N/A	N/A	3760.54	4743.66	3287.37	3541.59	3721.93	4185.11	4219.33	N/A	2965.35	N/A	4104.54
LVGIISSR	P06685	Inosine-5'-monophosphate dehydrogenase 2	8919.66	10862	8405.5	9191.47	11226.1	161029	9524.54	10993	10644.7	11034.3	8596.41	193314	10979.6	10200.5	9964.94	10887.3
NLIDAGVDALR	P06686	Inosine-5'-monophosphate dehydrogenase 2	4626.15	6097.93	4802.92	5053.66	5761.86	6245.58	3558.2	5964.98	5021.53	4427.85	4166.56	6727.16	4575.88	4796.37	7010.15	5916.55
EDLVVAPAGVTLK	P06687	Inosine-5'-monophosphate dehydrogenase 2	1373.28	N/A	1087.34	1753.36	1123.76	973.652	598.447	1162.17	871.612	1412.43	1076.17	N/A	1178.31	2034.2	1664.03	N/A
LPIVNESDELVAIIAR	P06760	Inosine-5'-monophosphate dehydrogenase 2	360.435	688.437	936.59	590.228	N/A	N/A	774.934	876.78	608.669	1004.54	526.174	N/A	1311.44	563.185	698.566	906.816
REDLVVAPAGVTLK	P06761	Inosine-5'-monophosphate dehydrogenase 2	3564.45	3030.33	2481.68	3702.99	2883.84	2277.9	1816.45	1655.2	3016.93	2598.78	2555.82	1337.42	3488.09	2715.2	1876.43	3451.06
HGFCGIPITDTGR	P06866	Inosine-5'-monophosphate dehydrogenase 2	6420.39	1776.99	2004.51	1972.58	1767.17	N/A	1674.26	1689.38	1295.31	2035.91	1724.23	N/A	1216	1873.54	1712.22	N/A
DIQENDEEAVQVK	P07153	26S proteasome non-ATPase regulatory subunit 11	3307.84	1842.34	1991.26	1990.59	1822.03	915.981	1698.86	1740.84	1548.81	1684.88	1183.61	2062.13	1506.04	1637.99	2040.72	1052.89
EQSILELGSLLAK	P07323	26S proteasome non-ATPase regulatory subunit 11	4636.73	5861.82	6975.85	8964.51	9485.39	8431.29	5080.66	5652.66	5342.82	5655.45	5205.57	9070.61	8086.54	6845.12	7197.32	7830.66
TGQAAELGGLLK	P07335	26S proteasome non-ATPase regulatory subunit 11	5371.82	5640.35	4167.48	3648.3	5712.6	4989.95	6291.35	5657.01	4333.1	5219.41	5095.36	5578.93	4339.96	3979.67	5629.54	5376.56
LYDNLLEQNLIR	P07340	26S proteasome non-ATPase regulatory subunit 11	1821.49	2974.74	2553.47	2113.59	2187.14	2415.45	1953.5	1702.12	1794.16	2107.91	2168.44	2226.5	2154.86	1764.68	2034.83	2292.95
GNIIISTPEK	P07483	U5 small nuclear ribonucleoprotein 200 kDa helicase	9511.69	7108.74	9504.87	9899.49	5350.39	12775.3	5869.13	9319.61	15149.5	5385.45	10588.5	8501.7	8284.49	9012.22	9523.97	9022.87
TGNFQVTELGR	P07632	U5 small nuclear ribonucleoprotein 200 kDa helicase	10765.6	7704.03	8816.24	9914.49	3904.26	13115.8	7000.53	8761.61	15176.9	5111.27	12256.7	8810.92	8024.08	10217.9	10986	8530.88
EEEVTGPVIAPLFPQK	P07633	U5 small nuclear ribonucleoprotein 200 kDa helicase	3384.52	3275.35	4080.95	5090.54	2875.02	9594.63	2590.21	4785.69	7424.12	2102.33	6162	8332.59	6861.9	4657.23	6491.92	5625.32
FYDDAIVSQK	P07825	U5 small nuclear ribonucleoprotein 200 kDa helicase	4575.98	4437.54	4375.51	3993.11	2208.43	8042.57	2708.59	5858.3	6964.73	2364.14	6825.96	4989.12	4562.22	4444.2	5045.74	4536.98
IVALSSSLSNAK	P07895	U5 small nuclear ribonucleoprotein 200 kDa helicase	12954.1	11471.8	9082.27	10141.3	6006.54	14634.3	8281.98	8553.44	18462.8	5926.44	12485.4	7963.31	9699.09	10017.3	9584.38	11561.2
GPVLEALVAR	P07943	U5 small nuclear ribonucleoprotein 200 kDa helicase	20112.6	3713.79	6587.37	6011.64	3216.79	8419.81	4042.62	4370.24	9297.15	3766.4	7402.15	6871.71	6510.32	5933.95	7530.71	4691.55
YAQAGFEGFK	P08009	U5 small nuclear ribonucleoprotein 200 kDa helicase	5920.12	2760.24	4863.33	4363.2	1863.74	6620.54	3254.45	3552.07	6853.01	2575.69	6566.59	3737.6	3637.34	4689.89	4629.36	4286.1
SNSLISIK	P08081	U5 small nuclear ribonucleoprotein 200 kDa helicase	5558.16	5566.54	7492.72	6679.34	N/A	8911.97	4781.32	5968.54	11319.3	3529.23	9345.27	7313.77	6824.67	6857.48	8256.25	7672.22
TLVEDLFADK	P08413	U5 small nuclear ribonucleoprotein 200 kDa helicase	2560.91	1458.27	3601.86	3259.31	1501.51	6384.84	2350.14	2783.12	5823.46	1357.26	4398.55	4441.23	3329.91	2661.38	3069.32	3609.46
NSAFESLYQDK	P08461	U5 small nuclear ribonucleoprotein 200 kDa helicase	6428.14	4195.81	6381.65	5688.9	N/A	8200.24	2361.74	4708.7	7987.91	2791.92	6565.41	6877.12	4535.44	3331.16	5172.79	5647.81
VFSLSSEFK	P08503	U5 small nuclear ribonucleoprotein 200 kDa helicase	3130.85	2893.77	4118.99	5088.98	2422.55	6264.44	2823.12	3879.03	9496.51	2705.23	5414.15	4043.45	3663.87	4364.05	4771.78	5288.07
CQLPDGSFR	P09034	U5 small nuclear ribonucleoprotein 200 kDa helicase	4123.1	2527.18	4111.84	3893.17	N/A	4482.58	2424.25	N/A	5985.14	2306.02	4879.66	3584.79	3895.01	3270.26	4104.86	3022
LTAIDILTTCAADIQR	P09117	U5 small nuclear ribonucleoprotein 200 kDa helicase	621.232	989.234	1307.49	1536.53	426.644	2428.25	838.468	1041.9	1791.34	927.021	1269.84	1310.19	1497.31	1230.41	1064.73	1340.4
EEISATQIIVCTPEK	P09216	U5 small nuclear ribonucleoprotein 200 kDa helicase	1778.8	1005.94	1169.48	827.328	N/A	1559.65	465.943	1433.04	1831.37	334.948	2076.53	1267.02	831.253	1250.65	881.695	1500.94
NALLQLTDSQIADVAR	P09456	U5 small nuclear ribonucleoprotein 200 kDa helicase	2500.13	2884.15	3023.76	1956.58	N/A	3504.54	1968.84	1909.37	2532.94	1496.8	4046.58	3073.7	2824.29	3511.06	4776.22	3333.86
YPPPTELLDLQPLPVSALR	P09527	U5 small nuclear ribonucleoprotein 200 kDa helicase	900.178	4598.25	16276.6	21338.2	18939	32457.2	5422.53	6008.52	17596.2	9637.01	13586.5	23139.2	20290.8	16964.9	14784.3	15317.4
DTLGLFLR	P09606	U5 small nuclear ribonucleoprotein 200 kDa helicase	2522.99	2394.89	4563.36	3870.97	2044.1	9146.25	2528.06	2766.59	8289.08	2147.77	4301.01	8162.09	5697.21	3832.39	6107.79	5142.06
VVLLTGETSTDLK	P09811	U5 small nuclear ribonucleoprotein 200 kDa helicase	4804.3	2956.78	5173.69	6678.68	2217.09	7819.89	3781.85	4899.09	9221.72	2382.79	5975.12	4578.25	4186.36	4852.48	5138.68	5147.81
IIYIAPMR	P09812	U5 small nuclear ribonucleoprotein 200 kDa helicase	N/A	4996.7	5572.44	4341.56	4152.28	5482.81	2107.7	3059.43	11112.8	2594.15	3123.1	3192.94	4066.87	4689.79	N/A	4307.66
SGGPVVVLVQLER	P09895	U5 small nuclear ribonucleoprotein 200 kDa helicase	3527.3	4758.72	4100.1	1580.44	1680.74	2527.12	2681.52	3388.82	6100.46	1925.18	4560.65	3759.44	5658.67	5038.64	4571.26	4711.53
EIDLLLGQTDDTR	P09951	U5 small nuclear ribonucleoprotein 200 kDa helicase	2577.86	N/A	3837.18	3567.65	N/A	6782.9	3012.84	2328.01	3343.62	972.202	5016.87	5413.31	3063.17	3171.04	5232.39	4610.65
DEPTGEVLSLVGK	P0C0S7	U5 small nuclear ribonucleoprotein 200 kDa helicase	2321.06	571.106	1809.73	2157.07	515.141	3431.51	899.318	N/A	2458.8	853.53	1897.09	2492.24	2201.42	1050.11	2256.33	N/A
DILCGAADEVLAVLK	P0C1X8	U5 small nuclear ribonucleoprotein 200 kDa helicase	286.365	2890.35	2491.93	4517.71	N/A	5069.04	1006.05	1160.37	4243.5	N/A	2264.66	4294.84	4952.99	3184.32	3505.58	2499.64
AALETDENLLLCAPTGAGK	P0C219	U5 small nuclear ribonucleoprotein 200 kDa helicase	1440.43	1506.84	766.324	973.81	N/A	2225.59	549.55	952.875	850.282	468.086	1932.13	1778.05	730.404	N/A	1283.29	N/A
GLIEIISNAAEYENIPIR	P0C2X9	U5 small nuclear ribonucleoprotein 200 kDa helicase	427.341	930.326	1422.57	808.16	N/A	N/A	921.738	739.473	1380.81	488.203	952.746	1420.12	2244.94	1858.6	889.279	1819.18
ALFLIPR	P0C5W1	Misshapen-like kinase 1	1350.5	80367.5	58187.1	62813.5	75502.1	58527.1	67002.9	70733.1	77116.7	2113.28	1406.52	76018.7	97547.5	69391.1	71235.9	78251.8
GQNVLLTENAEVK	P0C5X8	Misshapen-like kinase 1	2322.93	1526.7	2239.3	2278.71	1262.61	2142.51	1707.4	1688.91	2133.96	1977.07	1499.82	1951.89	1879.76	2766.61	1953.32	2543.1
TPASPVVHIR	P0DJJ3	Heterogeneous nuclear ribonucleoprotein L	14631.4	10818.6	13965.8	15673.1	8337.81	20083.4	8790.41	18251.5	28742	6660.47	20925.3	13570.1	7030.75	17413.5	20043.5	22798
NPNGPYPYTLK	P10066	Heterogeneous nuclear ribonucleoprotein L	8815.42	7523.97	8263.42	9493.7	5932.37	13177.6	5177.61	11771.4	13807.4	4035.33	17464.4	10233.1	4140.1	10773.5	11090.1	14045.4
LCFSTAQHAS	P10111	Heterogeneous nuclear ribonucleoprotein L	7208.29	5549.68	7578.99	8171.87	5014.57	12524.9	5024.56	8416.58	13610.2	3366.71	12429.1	6975.22	2770.95	8158.87	10043.2	12032.4
SSSGLLEWDSK	P10536	Heterogeneous nuclear ribonucleoprotein L	20448.8	10006.9	4562.63	1556.73	N/A	12668.9	7078.97	9362.26	17118.2	1588.31	20140.5	9154.15	2381.07	8427.65	10155.3	17336.5
ASLNGADIYSGCCTLK	P10688	Heterogeneous nuclear ribonucleoprotein L	4129.94	2376.15	2836.06	3124.23	1731.37	4555.59	860.737	4014.84	4303.36	995.74	5803.33	2384.55	N/A	3062.1	4207.75	5196.42
SSGLSSSLQPAGAK	P10719	Rho GTPase-activating protein 44	2205.91	1304.25	2023.65	2109.65	1872.72	2324.35	1717.08	2101.87	2118.11	1842.94	1985.27	1871.52	2399.7	2493.68	2629.77	1933.93
LAIIPGGGGTQR	P10760	Methylglutaconyl-CoA hydratase, mitochondrial	31395.1	34217.1	29458.3	28964	30098.9	30776.3	30928.4	30104	30179.9	25606.6	27493.3	31582.8	30558	30878.3	35892.5	32876.2
GIVVLGINR	P10860	Methylglutaconyl-CoA hydratase, mitochondrial	12409.8	25569.5	13408	13834.9	21229.3	13334.7	13418	15658.7	18354.8	17802.1	10634.5	11692.3	24175.7	26371.6	12288	14860.9
ELIFSAR	P10888	Methylglutaconyl-CoA hydratase, mitochondrial	19511.8	17115.1	15659.5	14516.6	15017.3	18551.7	15946.5	17666.6	15621.8	13735.9	16593.8	19459.8	17855.2	17875.3	21364.9	18815.5
SEVPGIFCAGADLK	P11167	Methylglutaconyl-CoA hydratase, mitochondrial	6808.62	5996.73	7471.16	7275.44	5983.13	7962.32	7046.42	6799.05	6097.3	4960.61	7093.55	7539.34	7578.91	8519.79	8115.61	8014.91
AVGLISHVLEQNQEGDAAYR	P11232	Methylglutaconyl-CoA hydratase, mitochondrial	5984.2	6200.71	3031.81	2264.02	3479.49	775.512	1551.76	3191.62	2642.91	3356.63	4555.46	1971.05	2102.88	3507.11	3778.62	3587.5
SLQLDIIPASIPGSEVK	P11240	Triple functional domain protein	1011.82	1257.95	1462.28	2315.52	1375.27	N/A	N/A	1208.04	1714.25	1324.19	1418.97	1657.67	2710.4	1777.25	1794.62	1436.81
IVEAVIK	P11250	A-kinase anchor protein 13	4417.7	3970.43	4792.96	5100.2	4475.99	4779.08	4789.69	3745.25	4019.29	4206.41	3709.23	3755.73	4170.87	5012.94	3617.01	5133.71
AAEVPSSVVEDCDNVVTGGDPFYDR	P11275	Kinesin-like protein KIF1A	1865.74	559.537	923.599	1753.4	980.138	1844.07	1242.85	N/A	1285.17	1043.25	1639.97	1398.34	1829.75	788.211	2129.24	971.145
ILFAPGSEEAIER	P11348	Kinesin-like protein KIF1A	3081.62	3762.6	3308.48	3351.02	2550.38	3993.26	3236.55	2928.59	4152	3168.76	2713.62	N/A	3885.58	N/A	2757.23	2305.47
LGSTFTFR	P11442	Kinesin-like protein KIF1A	N/A	642.716	835.453	1603.55	1411.25	N/A	948.877	1193.28	1300.45	1285.23	1216.41	N/A	1165.95	1099.31	826.302	N/A
TIVAVEVQDQK	P11475	Kinesin-like protein KIF1A	2347.54	2119.85	2632.63	1619.82	2276.83	1698.24	2380.12	1496.45	2194.34	2379.73	2074.09	1885.55	1933.62	2576	941.287	2115.83
EREEATYLLEQQR	P11497	Kinesin-like protein KIF1A	2910.03	2499.8	1354.33	1803.02	1356.37	N/A	1561.27	1007.87	2378.51	1475.53	1266.54	N/A	N/A	955.313	706.027	1150.13
ASSSLGLQDFDLLR	P11505	Protein kinase C iota type	929.635	1379.49	1290.81	1550.7	1321.35	2044.22	840.208	1082.3	1229.4	975.11	1425.28	1625.47	1610.6	1173.66	1362.92	N/A
LDELQASDVTVK	P11506	Nucleoprotein TPR	6127.04	4861.51	4513.2	3936.52	3156.5	4247.1	4248.08	4235.88	4900.14	3780.38	4351.4	5497.7	6144.19	4143.06	4133.3	2257.24
LQEQVTDLR	P11507	Nucleoprotein TPR	6456.27	5657.93	5093.48	6198.91	4575.51	5987.55	5511.54	5820.17	6105.21	5184.99	6347.14	7038.31	N/A	5382.33	7031.56	5131.7
FEVAQVESLR	P11517	Nucleoprotein TPR	4488.19	5644.47	5243.93	4615.17	4229.73	3975.21	4902.17	5775.66	5718.99	5452.28	4598.83	4915.55	4691.57	4423.97	6341.9	3385.21
SQEQILEILR	P11530	Nucleoprotein TPR	2748.84	3626.12	3178.87	2808.55	1883.76	1481.18	3281.5	3953.36	2834.9	3137.55	3608.41	3095.53	3449.03	3370.81	3467.21	2390.92
TDELLALGR	P11598	Nucleoprotein TPR	3616.68	2077.25	2549.05	2832.47	2814.93	1687.76	2532.7	3218.45	3005.09	3055.96	3306.61	4031.13	2646.08	2685.89	2620.21	1632.06
ISTQLDFASK	P11608	Nucleoprotein TPR	3273.42	1520.53	1829.73	2730.63	1972	1848.85	1250.73	2337.25	3818.09	2831.05	2551.14	2645.19	1763.42	1751.25	2623.2	N/A
ESAEFQTQLEK	P11654	Nucleoprotein TPR	3490.92	1279.96	2216.66	2313.15	1579.47	N/A	2202.2	3546.37	2617.28	2269.15	2637.74	2364.66	2905.62	1976.53	2746.05	1423.39
SSTSQTVSTPAPEPIIESTETIEAK	P11661	Nucleoprotein TPR	1302.7	N/A	1465.58	2357.4	980.54	1888.32	1000.78	N/A	1392.93	1715.15	1359.36	2712.68	N/A	1233.09	1465.4	N/A
SLEGQVENLQK	P11730	Nucleoprotein TPR	6303.69	2810.87	3098.86	2944.48	2186.11	3037.12	2772.27	3279.22	2965.53	3012.77	3339.98	3532.4	3281.6	3101.01	2997.03	2453.34
ELQELQDSLNAER	P11883	Nucleoprotein TPR	2099.07	1375.08	1736.81	1644.3	945.96	1342.55	940.576	1256.67	903.819	2118.5	1322.52	N/A	1859.03	1234.57	1654.95	N/A
EVVQSPLNISLNEEGK	P11884	Nucleoprotein TPR	1578.34	1467.69	1188.35	1268.29	N/A	N/A	1031.4	1325.76	1378.1	1337.45	1555.03	2164.43	N/A	1197.25	1044.58	N/A
EASIPLGILVVR	P11915	Diacylglycerol kinase iota	1346.39	2013.44	2229.89	3823.2	5075.43	N/A	1891.18	1779.99	2974.26	2567.71	1730.58	N/A	5929.31	N/A	3086.93	2495.91
TNEGVIEFR	P11980	Serine/arginine-rich splicing factor 6	8548.85	8347.42	9004.23	8571.37	5819.55	10267	4749.67	8841.81	11536	4788.55	12416.8	9893.86	8904.47	8663.57	9691.71	11180
DADDAVYELNSK	P12001	Serine/arginine-rich splicing factor 6	2224.51	N/A	2498.71	1539.87	536.345	N/A	935.56	2111.64	2707.63	950.071	3125.45	1633.1	N/A	806.351	N/A	2139.2
ELGSLPLPLSASEQR	P12007	Syntaxin-12	3525.61	4911.85	6518.57	10014.1	9595.86	10016.3	7440.1	5856.64	N/A	5769.31	5300.1	8422.69	8296.29	5982.46	10132.4	8255.73
TVLVSSGLR	P12075	Prolow-density lipoprotein receptor-related protein 1	8903.08	13433.8	13450.4	11333.7	10151.4	13798.9	14981.1	14092.2	14665.5	12494	11686.4	14675.7	13662.9	11624.5	12458.9	14037.9
TGIGVQLK	P12346	Prolow-density lipoprotein receptor-related protein 1	3242.08	2570.25	2832.75	2756.24	2481.78	2926.88	2406.45	2976.04	4175.55	2920.43	2487.44	2933.61	3208.85	2374.36	2212.52	2617.74
GDYSVLVPGLR	P12368	Prolow-density lipoprotein receptor-related protein 1	2294.68	2967.66	2361.55	3400.88	2723.15	N/A	2768.11	3000.74	4361.7	3034.77	3057.68	N/A	5101.59	3149.53	N/A	1959.82
IETAAMDGTLR	P12369	Prolow-density lipoprotein receptor-related protein 1	94735.5	413212	329208	404617	485638	291214	N/A	N/A	364069	351529	25568.1	340004	N/A	N/A	99154.7	318461
ILQEDFTCR	P12711	Prolow-density lipoprotein receptor-related protein 1	2082.09	3091.13	3155.47	2210.15	1944.31	2031.28	2894.1	N/A	2430.82	2620.57	2278.99	N/A	2291.03	1965.21	3254.36	2025.36
TLLFSGQK	P12749	Prolow-density lipoprotein receptor-related protein 1	7898.37	9743.46	9058.71	9532.56	6167.53	N/A	9797.37	N/A	9662.32	N/A	9045.04	10716.1	11317	9401.54	10617.2	N/A
AVTDEEPFLIFANR	P12785	Prolow-density lipoprotein receptor-related protein 1	1210.75	4671.34	2817.45	2846.61	2403.17	6756.88	2107.97	4451.23	2238.02	2107.25	4407.27	4067.42	7253.29	4709.64	6184.8	4277.25
GVAGAQPTVTLLR	P13084	Prolow-density lipoprotein receptor-related protein 1	8156.43	9855.61	10019.8	9884.41	7225.88	10837.3	9813.26	9053.66	12688.7	8634.63	9216.07	9916.41	11381	9997.88	12907.6	9229.21
SERPPIFEIR	P13086	Prolow-density lipoprotein receptor-related protein 1	3508.36	3452.62	3586.97	2793.58	3703.17	1898.29	2798.59	3446	4775.04	4327.84	3666.89	3341.33	3483.7	3440.33	2705.69	N/A
EDYIEFASLDGSNR	P13221	Prolow-density lipoprotein receptor-related protein 1	896.88	961.029	756.292	943.717	343.98	904.258	1018.99	1146.93	678.897	1053.99	1233.4	1409.53	1165.43	514.149	1157.59	1090.47
GPVGLAIDFPESK	P13233	Prolow-density lipoprotein receptor-related protein 1	2074.18	1499.79	2965.95	2490.32	N/A	3253.62	2333.78	2000.5	3353.52	1299.76	2464.26	1969.85	3129.23	1474.35	2963.1	N/A
SDVEAIFSK	P13264	Heterogeneous nuclear ribonucleoprotein C	7355.48	5834.7	7962.81	10116.4	5600.73	10835.3	5547.38	8982.66	12845.6	5193.74	12286.3	8512.44	1506.27	8624.82	9169.7	10223.7
VDSLLESLEK	P13383	Heterogeneous nuclear ribonucleoprotein C	5900.48	6711.92	6310.92	8493.79	3941.23	10829.5	4547.55	9406.26	9619.36	3617.94	9746.92	6911.48	N/A	6849.59	9455.02	11517.5
VPPPPPIAR	P13471	Heterogeneous nuclear ribonucleoprotein C	38380	18082.1	51233.9	67477.3	34350.6	78957	25272.3	64547.5	89144	26686.3	83123.5	51478.5	N/A	59708.2	45752.9	90419.9
GFAFVQYVNER	P13596	Heterogeneous nuclear ribonucleoprotein C	11120.7	17007.1	13208.9	8435.67	11056	10394.3	9792.68	16020.3	20705.3	8717.72	20465.1	15448.3	4106.87	15988.2	15668.3	21517.8
VFIGNLNTLVVK	P13635	Heterogeneous nuclear ribonucleoprotein C	4972.5	5897.54	4789.8	7170.91	6128.87	10640.3	2635.16	6882.52	14716.2	3340.61	6541.47	6002.06	1991.3	8423.46	4971.13	7695.83
MIAGQVLDINLAAEPK	P13638	Heterogeneous nuclear ribonucleoprotein C	2774.74	3772.43	3513.76	5870.97	3944.59	4389.53	2347.59	4451.26	6237.78	2241.57	4888.44	2310.67	N/A	3581.75	4139.66	5697.3
LVINPLNQLLNMFTGPYK	P13676	Dynamin-binding protein	13138.9	4756.59	13952.6	34470.4	15171.6	15994.8	22275.7	10905.4	12648.6	28061.8	8115.02	7351.16	20214.8	12958.2	21525.2	10441.9
LVLLGESAVGK	P13697	Ras-related protein Rab-5A	19029	29835.8	28533.3	26758.2	29510.4	28774.2	28118.6	30284.4	24331.1	25138.2	25100.1	27269.5	28787.1	24756.5	28255.8	32791
GVDLTEPAQPAR	P13803	Ras-related protein Rab-5A	16919.8	19418.3	16171.5	16425	15789.4	15621	17581.1	16595.8	13324.7	14168.6	15996.3	16661.6	14940.1	17207.5	16186.3	17266.1
FEIWDTAGQER	P14408	Ras-related protein Rab-5A	13816.8	7530.58	3772.66	N/A	N/A	3427.75	7917.45	6021.44	4293.59	2610.51	8928.68	4822.06	3812.31	4832.28	4816.04	7455.25
GAEILADTFK	P14562	N(G),N(G)-dimethylarginine dimethylaminohydrolase 1	9730.24	6989.76	8065.19	10547.5	9033.62	9951.44	7572.39	9355.36	7672.82	7991.39	9754.97	10842.9	10513.6	8803.66	11544.5	9616.29
DENATLDGGDVLFTGR	P14604	N(G),N(G)-dimethylarginine dimethylaminohydrolase 1	3205.35	4493.11	4474.94	6198.48	3926.55	8157.81	3961.94	5415.55	3450.18	3041.05	3790.26	7042.53	5293.75	4293.25	6097.56	5263.61
DYAVSTVPVADSLHLK	P14659	N(G),N(G)-dimethylarginine dimethylaminohydrolase 1	2499.93	3277.06	3144.23	4900.36	4631.55	5220.8	5897.09	4307.77	3515.29	3364.48	3447	5185.08	3958.2	5700.21	4237.55	4274.48
EIQGFFNIPVDNLR	P14668	Phosphoribosyl pyrophosphate synthase-associated protein 2	3624.34	5506.87	6993.16	7262.54	10130.8	9589.25	4746.48	4879.97	2731.62	5771.96	5179.09	9301.85	8036.54	6041.88	7692.64	8294.43
EEDGSLSLDGADSTGVVAK	P14669	Transcription intermediary factor 1-beta	5733.71	3528.49	4168.83	6476.3	4928.29	6735.55	6008.26	6581.51	4618.86	5081.73	4533.95	7932.3	7157.02	5898.46	8417.31	5119.85
DHQYQFLEDAVR	P14841	Transcription intermediary factor 1-beta	19279.7	14287.7	11664.3	11842.5	15340.4	12545.4	14559.3	14858.5	13569.6	14266.9	12819.1	16391.2	15547	13600.7	16431.6	13795.4
VFPGSTTEDYNLIVIER	P14881	Transcription intermediary factor 1-beta	3250.9	3634.43	4365.63	3017.83	3107.32	1995.24	5031.3	4220.68	3544.03	4167.91	3109.97	4342.46	3692.32	3302.3	4530.17	3131.78
LSPPYSSPQEFAQDVGR	P14882	Transcription intermediary factor 1-beta	4357.16	3243.36	2494.89	2469.76	4974.88	3923.89	5421.32	3340.92	2753.84	2711.58	3434.66	3818.57	5358.38	4063.33	3940.54	3341.41
LDLDLTSDSQPPVFK	P14942	Transcription intermediary factor 1-beta	18574.2	24391.6	24404.7	16260.9	27337.9	43126.1	29672	25360	21365.5	20941.9	20697.2	40185	35942.2	25416.3	38056.3	28027.1
ADVQSIIGLQR	P15087	Transcription intermediary factor 1-beta	35061.6	36185.1	32448.2	37671	40611.8	43655.1	42638.7	40524.3	29593.8	32522.7	34230.5	50472.7	52530.7	42430.6	59099.3	38190.3
LLASLVK	P15146	Transcription intermediary factor 1-beta	15848.6	21160	16671.5	21623.6	19718.4	24221.8	18105	19056	24268.2	21801.8	16978.9	21007.5	27257.5	22605.4	19820.2	21918.9
DIVENYFMR	P15178	Transcription intermediary factor 1-beta	2640.02	12582.6	11396.4	10341.5	16358.6	12921.7	12348.1	10336.9	11563.8	11205.5	5761.05	16480.9	10257.7	11325.4	6539.79	8352.3
FSAVLVEPPPLNLPSAGLSSQELSGPGDGP	P15205	Transcription intermediary factor 1-beta	178.206	7217.96	23225.2	35070.6	11219.1	24225	6764.56	1519.71	10994.2	13784.6	5521.22	12975	6202.08	8836.89	11821.3	9053.34
LIYFQLHR	P15387	Transcription intermediary factor 1-beta	1867.67	7303.76	2058.33	1498.38	6579.57	638.298	3084.12	3058.1	4600.77	7086.18	1345.76	1440.85	8971.93	7727.66	1231.61	1203.35
HEPLVLFCESCDTLTCR	P15589	Transcription intermediary factor 1-beta	8450.13	7446.81	5653.38	2119.5	4441.48	N/A	8522.64	5395.32	2544.4	6280.56	6723.9	4362.58	4448.57	4367.95	4072.35	6056.1
MAILQIMK	P15650	Transcription intermediary factor 1-beta	1802.77	5681.07	7630.71	8917.79	14798.6	4448.8	5640.96	3873.33	8844.5	9437.78	1985.01	2611.05	N/A	6064.28	N/A	2416.34
MIVDPVEPHGEMK	P15791	Transcription intermediary factor 1-beta	N/A	1283.66	701.951	1717.39	2229.28	596.57	1033.73	443.24	1068.33	1345.79	352.46	617.794	556.735	1208.28	N/A	N/A
GGIVDEGALLR	P15865	D-3-phosphoglycerate dehydrogenase	7345.37	12198.2	13217.7	6923.18	11416.2	7640.06	11921.3	12497.1	6276.9	9588.33	9628.89	12425.1	6772.88	6362.01	7018.69	12054.2
VTADVINAAEK	P15887	D-3-phosphoglycerate dehydrogenase	6078.04	8642.49	11598.8	5795.05	10568.6	6963.73	9661.69	11237.8	5870.49	8814.15	9525.47	11035	7461.22	6985.17	6775.08	12327.8
GQPLLLFR	P15999	D-3-phosphoglycerate dehydrogenase	2505.14	8706.84	8154.98	4412.62	7181.55	4921.38	5321.14	6639.09	3647.37	6022.76	5518.67	4943.15	5541.9	4870.92	N/A	7273.72
NAGTCLSPAVIVGLLR	P16036	D-3-phosphoglycerate dehydrogenase	2508.44	6975.09	5862.16	5447.4	15245.7	4852.22	3174.54	2912.52	4007.34	3115.77	3049.64	5676.12	6640.27	4599.29	3328.52	3025.88
AGTGVDNVDLEAATR	P16086	D-3-phosphoglycerate dehydrogenase	5272.89	5645.4	7759.95	3110.42	5905.24	3000.61	6370.4	4757.84	3129	5118.44	5161.18	6093.17	3601.11	2969.89	3559.34	7428.02
GTIQVVTQGTSLK	P16446	D-3-phosphoglycerate dehydrogenase	8662.87	11374.3	12175.9	6997.67	14579.4	8136.53	11758.3	9903.81	6338.25	11152	9873.45	8275.48	6857.9	7865.48	6850.76	13389.3
DFLVIPSPVLVK	P16617	Phosphatidylinositol 4-kinase alpha	1503.32	6736.64	8211.2	13642.1	29002.9	23649.8	3535.79	2889.77	10397.7	9675.17	5094.85	10614.3	21689.5	10048.5	8586.38	6291.74
SNLDITVGSR	P16638	Phosphatidylinositol 4-kinase alpha	6626.16	5369.56	5476.89	6355.27	4981.83	6547.03	5236.61	6034.16	6867.38	6541.93	5484.87	7180.06	7010.23	5869.66	6950.85	5233.35
NDTVTPAELNELR	P17074	Phosphatidylinositol 4-kinase alpha	5775.87	3125.75	4291.18	4868.67	3514.17	6149.2	4722.44	4638.56	5628.24	4113.45	4381.62	5426.69	4940.29	3451.78	4035.65	2587.96
IVEEPVLK	P17077	Phosphatidylinositol 4-kinase alpha	4120.02	2052.99	3148.56	2984.33	2925.13	4456.61	4830.48	2657.63	5203.78	3233.09	3878.52	4645.4	3772.17	3824.17	4431.62	2549.54
IPEELEGVR	P17078	Phosphatidylinositol 4-kinase alpha	2971.65	4128.32	3284.92	3565.91	3742.04	3952.6	3506.7	3278.5	3926.05	4382.53	3560.58	3418.1	2980.71	2687.77	2613.8	2231.34
DIAIDNICR	P17220	Phosphatidylinositol 4-kinase alpha	5005.09	1475.94	3101.25	2988.27	2270.83	2729.68	2632.51	2902.35	3103.77	2510.22	3721.47	2881.16	3220.1	3355.81	2783.31	N/A
TSSVSSISQVSPER	P17425	Phosphatidylinositol 4-kinase alpha	2397.67	942.33	1180.08	1930.53	N/A	1226.49	1471.02	929.62	1458.64	1316.52	1756.09	1009.9	1095.5	N/A	N/A	1239.03
TEVPPLLLILDR	P17438	Vacuolar protein sorting-associated protein 45	263.642	1379.43	2219.21	2688.45	4843.8	2178.3	1086.59	912.254	1596.31	2331.72	1125.15	1997.02	2718.71	1627.47	1547.42	1278.27
GALVLGSSLK	P17475	Glycogenin-1	11117.3	12430.2	12511.6	11509.3	12716	10588	12981.6	12852.4	14675.3	13271.7	10237	15074.5	11195	12206.5	13172.9	15123.7
TVVLASPQVSDSMR	P17702	Glycogenin-1	N/A	3059.87	3899.03	2714.72	4064.14	N/A	2766.16	1663.88	2953.53	3871.39	1207.5	2395.07	N/A	2923.36	1019.86	N/A
LGVTGAEEQALGSK	P17764	STE20-like serine/threonine-protein kinase	4456.02	1920.78	3529.04	3280.47	2238.45	3175.52	3233.76	3961.87	2370.7	2839.74	3321.64	2793.26	3436.12	2326.56	3865.19	2103.03
DLQLQCEANVR	P18088	STE20-like serine/threonine-protein kinase	2677.16	1145.53	2223.51	2455.84	1234.3	2114.32	1964.98	1833.23	1980.12	2342.06	2406.39	2283.68	2506.23	1403.54	N/A	2021.11
AALLDQIR	P18163	Neural Wiskott-Aldrich syndrome protein	5049.93	4622.06	5129.07	5936.15	5652.47	6482.85	5554.87	5372.99	4636.43	N/A	5014.79	5291.96	7529.45	5385.35	N/A	5900.94
DALLDQIR	P18265	Neural Wiskott-Aldrich syndrome protein	2234.17	N/A	1958.15	1524.13	2624.42	3218.03	2421.88	2213.89	1389.45	2421.5	3048.86	2894.46	3762.58	2194.27	2635.76	3070.7
TIAPIIGR	P18266	Cell division cycle 5-like protein	5378.51	4125.12	6146.66	6935.9	5177.52	8718.52	5130.41	6392.9	7276.32	4724.31	6015.39	6553.98	6440.08	6202.73	8318.33	7331.15
ILLGGYQSR	P18298	Cell division cycle 5-like protein	6768.63	6747.77	6986.05	6884.89	5595.91	7195.14	4563.94	6399.98	7437.77	4776.35	6993.73	5851.08	8411.28	5910.66	5884.9	7154.85
NDFEIVLPENAEK	P18395	Cell division cycle 5-like protein	2277.04	2085.51	3053.5	N/A	1851.5	3646.1	1789.01	2807.29	2770.93	1163.75	3802.46	1802.04	3237.1	2390.08	3820.26	2065.03
GVDYNAEIPFEK	P18418	Cell division cycle 5-like protein	5655.32	2618.22	3333.96	3079.5	2265.39	5069.05	N/A	N/A	3597.13	2015.52	3057.81	N/A	3835.41	2912.37	3678.6	4520.66
GGLNTPLHESDFSGVTPQR	P18420	Cell division cycle 5-like protein	2811.21	1303.76	2597.19	3021.59	2834.87	4091.86	1992.45	1504.06	2243.08	2192.15	3326.37	2319.32	2655.16	2880.21	4499.3	2170.22
LGLLGLPAPK	P18421	Cell division cycle 5-like protein	1565.1	1827.7	1721.28	2647.72	1602.81	2537.99	N/A	922.928	1430.56	946.868	1430.87	1088.83	2482.28	2061.61	2080.43	974.409
ESDLPSAILQTSGVSEFTK	P18422	Cell division cycle 5-like protein	1063.87	701.11	420.87	791.615	N/A	940.364	N/A	297.484	425.812	278.228	730.795	849.717	388.64	459.991	649.424	856.703
GLFPENFTR	P18445	Amphiphysin	21082	19290.4	23866.9	27187.9	21900.7	29318.9	31060.9	21956.8	15624.9	23817.9	19660.4	29394.2	40767.8	25587.2	45218.9	24138.5
GYLAAIK	P18484	Amphiphysin	20756.9	18569	17649.7	23580.7	20929.5	24134.4	23507.4	20533.9	16059.6	19892.9	16901.1	22030.3	30374.7	20399.2	30482.8	19905.7
AALPAGEGESPEGAK	P18665	Amphiphysin	4744.09	3565.12	4636.05	6707.41	4019.22	7864.23	7703.03	3073.7	3392.23	5224.19	4069.25	5754.25	8231.57	5048.85	8942.85	4758.6
EATEDVAPQGPAGEK	P18886	Amphiphysin	15413.8	9726.89	1224.69	3227.36	2445.27	6175.13	4893.22	3039.07	2336.78	3448.14	2993.29	5469.63	11326.4	2263.39	10176.7	2384.82
ESDWLQYR	P19139	Amphiphysin	17780.2	6646.36	2449.69	N/A	N/A	5483.75	9047.37	3665.82	3460.77	3789.69	6732.15	4104.71	4988.55	3931.33	7135.67	5199.36
AFSIQGAPSDSGPLR	P19234	Amphiphysin	32304.4	34174.3	34306.2	44495.6	38317.5	58089.1	54342.9	34693.1	26513.2	36350	30736.9	43127.7	56301.2	38508.6	67162.7	42392.3
ADETKDEQFEEYVQNFK	P19332	Amphiphysin	8788.18	5798.55	4706.44	4849.41	5838.48	5913.09	6689.94	4666.95	3478.3	5714.9	4961.88	5087.08	7997.62	4924.15	8817.4	5095.42
VGFYVNTFK	P19468	Amphiphysin	7243.14	11005	7789.79	12567.8	10649.9	12113.4	11125.3	7949.54	8507.6	13013	5920.82	5409.76	16229	11821.7	9090.19	6735.26
IDVESTELASSESPQAAELEAGAPQEK	P19491	Amphiphysin	3503.04	1859.15	3066.35	5423.52	3894.1	6946.71	3933.97	2622.59	2336.12	3659.99	1995.82	2964.86	4513.63	2094.07	4262.93	1640.98
VETLHDFEAANSDELTLQR	P19492	Amphiphysin	7615.16	7017.52	8449.16	10829	6853.7	5780.46	15106.5	9793.56	5539.22	9611.3	7111.7	10351	14212.2	7980.22	15292.3	7255.07
GVFPENFTER	P19511	Myc box-dependent-interacting protein 1	20444.2	19060.1	20870.2	39008.6	24597	43526	42566.4	19075	14491.9	29764.7	19192.9	28962.4	50131.7	24055.2	51310	27047.3
IAKPVSLLEK	P19527	Myc box-dependent-interacting protein 1	9566.36	6228.46	5970.8	7345.05	6302.28	6939.23	7367.44	6566.39	5509.18	5829.96	6456.7	7513.26	8930.73	7145.45	9522.78	8013.66
GPPVPPPPK	P19627	Myc box-dependent-interacting protein 1	2933.58	N/A	2049.53	2785.8	2212.8	2108.62	2885.02	1979.02	776.554	2100.93	1454.86	1741.67	3021.55	2179.74	3987.01	N/A
ADETKDEQFEQCVQNFNK	P19686	Myc box-dependent-interacting protein 1	2162.29	969.85	1393.05	1916.55	1591.18	N/A	1354.86	1152.32	710.923	2076.5	1435.59	1022.73	2431.04	1948.78	1625.01	N/A
VNHEPEPASGASPGATIPK	P19804	Myc box-dependent-interacting protein 1	5299.79	2966.87	3907.5	5527.25	3922.2	5555.83	4223.66	2373.96	2402.04	2481.61	4043.67	5258.83	4647.53	3277.34	6119.53	3149.84
LNQNLNDVLVSLEK	P19945	Myc box-dependent-interacting protein 1	3547.69	2547.56	2823.06	1924.82	2781.72	4119.55	3469.77	3008.46	1531.92	2750.91	2244.49	2760	5365	3471.95	6064.03	3724.1
LDLPPGFMFK	P20059	Myc box-dependent-interacting protein 1	N/A	1567.76	2654.65	7709.51	7167.05	5601.75	3519.21	N/A	1197.12	4864.01	N/A	1779.2	4780.47	2875.03	N/A	1276.07
VQAQHDYTATDTDELQLK	P20070	Myc box-dependent-interacting protein 1	6604.03	3982.83	3136.53	6429.53	3691.33	8409.87	5804.38	2922.42	2280.02	6412.4	2929.46	4119.78	8177.44	3344.67	10467.6	3064.73
VIAPTNAEVLPILPEPESLELK	P20595	MAP kinase-activating death domain protein	1228.36	2707.75	8267.02	14888.5	18395.3	22427.5	4348.4	3080.83	6624.8	7999.05	4720.71	12791.1	11500.4	7894.98	10031.5	7619.8
SQISADSGVSLASASQR	P20650	MAP kinase-activating death domain protein	3329.6	2469.83	3593.34	4003.41	3335.34	3762.57	4444.92	2434.14	3246.41	4240.01	2423.38	2919.44	4577.3	3633.26	4082.49	2941.21
VYLYEGLLGR	P20651	MAP kinase-activating death domain protein	2100.64	2448.58	1165.24	2136.06	2262.87	1048.74	1449.2	1315.89	2160.99	2281.72	1655.3	N/A	2385.8	1547.81	1713.3	N/A
DDTSFVFTLTDK	P20717	MAP kinase-activating death domain protein	1288.62	981.648	950.084	1895.91	N/A	2226.79	1344.32	1368.43	883.086	752.328	1043.31	1108.97	1000.34	898.013	1435.39	N/A
SSALLHDLR	P20760	MAP kinase-activating death domain protein	1177.24	2028.28	3575.19	2358.72	1599.48	N/A	1790.63	2207.43	2196.64	1970.64	2125.14	3070.2	2011.34	2178.94	N/A	N/A
LLDYLVIVGAR	P20788	MAP kinase-activating death domain protein	1320.24	2727.01	1187.86	926.157	2049.54	N/A	878.035	1461.34	2166.37	2435.89	920.847	N/A	N/A	2796.47	1195.85	1123.51
HPSSDSVAQTPELLR	P20942	MAP kinase-activating death domain protein	4348.38	3387.1	3243.87	4066.13	4414.41	3673.06	3638.28	3735.61	4096.95	4169.71	2882.03	2752.65	3795.57	3553.83	3204.98	3583.4
TTPFPSLK	P21139	MAP kinase-activating death domain protein	5781.72	5836.12	5758.33	8335.65	5017.2	8370.46	7885.71	6877.67	6532.64	7307.27	5451.02	7076.44	8429.61	7383.13	9023.85	6747.55
GGDLFDAITSTSK	P21396	Serine/threonine-protein kinase DCLK1	3071.03	10460.9	9148.75	13187.5	13220.7	14907.9	9844.2	7824.69	10952	9233.07	6842.41	10357.4	14440.8	7574.67	10949.1	10073.2
AEFGPPGPGPGSR	P21531	Aminopeptidase B	22294.1	23719.1	19727.8	24144.9	22969.7	22434.6	22445.8	24557	20871.7	17566.3	23557.4	21319.7	23734.1	21621.7	22291	21258.1
GVDSIPGFEFNR	P21533	Aminopeptidase B	12104.1	18396.8	17531.1	19505.6	19441.2	21303.7	17978.8	19679.5	19393.2	13442	17576.7	25741.8	23266.6	19263	20725.8	22357.2
CLLPEGASELR	P21575	Aminopeptidase B	9785.82	13560.9	12065.9	11154.2	13029.8	12602.2	12045.1	15050.6	10371.9	10123.5	14290.8	17601.1	15697.2	12351.5	14341.6	14564.9
EEYNGVIEEFLATGEK	P21588	Aminopeptidase B	1102.19	2548.48	2257.18	2182.94	2822.79	3651.55	1035.58	2891.1	1027.07	1192.52	2205.63	4348.04	3420.69	1668.41	3060.19	3093.08
IEPGVDPDDTYNETPYEK	P21670	Aminopeptidase B	5915.1	4798.27	2263.39	2586.3	2109.66	5273.75	2632.8	3597.12	1951.67	2371.59	3362.05	4138.07	3785.22	3256.36	4203.78	4060.1
AFFPCFDTPAVK	P21707	Aminopeptidase B	5773.76	10040.9	8835.62	10362.3	11180.5	12674.3	7517.93	9360.78	9914.25	7930.1	8828.78	11830.5	10062.2	9501.27	10431.6	11510
GDSDVPEVPPSSDR	P21708	Phosphatidate cytidylyltransferase 1	124513	69715.5	73722	83852.7	75189.8	105534	85915.2	91320	101555	78810	89696.3	102888	106077	93331.1	112600	79369.7
VLQQLLVLQPEQQLNIYR	P21913	Phosphatidate cytidylyltransferase 1	2995.55	4692.25	4091.08	5998.92	9772.87	9386.99	3239.92	3759.48	7423.06	6386.43	3316.98	5462.98	6600.98	5387.07	4331.65	4475.88
EEQLQFLIR	P22057	Phosphatidate cytidylyltransferase 1	4004.23	3759.1	3731.48	3417.81	3798.2	N/A	4343.67	4000.61	3748.92	3906.15	3958.46	4696.11	4012.89	3974.46	4175.49	N/A
GILQPTWK	P22062	Phosphatidate cytidylyltransferase 1	32812.4	12914.4	4282.75	N/A	N/A	7495.07	13544	10665.5	11386	4382.83	12184.7	11138.4	6808.28	9133.45	9584.37	11164.7
EAEPDLLAVLR	P22831	Neurochondrin	6176.04	5183.32	6168.56	8758.21	7688.97	11188.3	5356.53	6767.5	7573.32	5567.36	5581.1	9082.87	9700.21	7266.44	8976.18	6786.9
LLSTSPALQGTPASR	P23358	Neurochondrin	11416.2	7465.14	7929.45	7971	7087.75	8213.66	8056.9	7022.01	7427.09	7092.52	8248.04	7645.86	8400.86	6952.59	9182.03	7716.18
IFDAVGFTFPNR	P23514	Neurochondrin	2527.85	4062.45	3830.99	3964.36	5398.62	3369.03	2328.98	3478.91	4514.59	5110.64	2814.95	3533.29	5585.19	4238.81	4220.73	2570.28
NDSEQFAALLLVTK	P23565	Neurochondrin	1742.86	2501.41	4343.52	2749.16	2819.44	2158.11	3415.67	4045.03	2457.93	2863.87	2428.02	4657.35	4690.62	3640.36	3968.64	4076.78
EVCQLLPFLVR	P23576	Neurochondrin	343.221	1112.17	1319.14	954.423	2244.76	N/A	N/A	657.688	991.95	1525.46	860.228	N/A	1712.91	1407.56	1058.16	N/A
SVQYDDVPEYK	P23711	CD166 antigen	4510.25	3604.55	3038.17	3594.61	2587.58	2989.61	3910.65	4177	2364.45	3032.65	3873.39	4868.97	3502.12	2970.25	3635.48	3995.31
SSNTYTLTDVR	P23928	CD166 antigen	3610.12	3919.89	2710.72	3039.23	2726.87	3265.67	2925.17	4151.47	2318.66	2995.36	3510.82	3330.37	3203.8	2215.85	3707.52	2836.56
TYLPSQVSR	P23965	Coatomer subunit beta'	15379.5	16314.6	15537.8	14675.6	13456.4	14595.5	16558.3	17506.4	15339.9	13804.3	15166.4	18525.9	18776	14425.4	18357.2	17109.3
LPEAAFLAR	P23978	Coatomer subunit beta'	8669.39	9561.14	9442.84	8897.03	10074.6	9370.42	9795.76	10802.2	11214.7	8548.67	8971.23	11982.3	10343.6	8749.72	10019.5	9636.95
VFNYNTLER	P24049	Coatomer subunit beta'	9416.74	8299.6	7541.11	7044.57	7555.63	7939.53	7889.69	7044.47	7414.27	7093.3	8114.12	8351.98	8039.04	6193.09	10162.3	8096.72
QYPLVTPNEER	P24050	Coatomer subunit beta'	13953.1	12203.9	12081	11367.6	13460.2	12464.3	13027.6	14278.3	12820.6	11108.8	13390.9	14937.4	14220	11041.5	13529.9	N/A
AAESLADPTEYENLFPGLK	P24062	Coatomer subunit beta'	4159.83	7229.32	5444.18	5698.07	8126.72	12445.2	4211.64	3622.11	5289.01	4238.77	5165.6	9761.2	7413.01	4178.45	7375.22	6061.75
TFEVCDLPVR	P24155	Coatomer subunit beta'	5580.56	5808.2	7422.18	7123.81	8571.9	6497.26	6247.19	6544.76	9591.1	7011.05	7606.3	8571.58	4673.01	6386.23	6717.45	6424.25
GSNNVALGYDEGSIIVK	P24268	Coatomer subunit beta'	4869.08	8171.92	4312.26	4864.01	4582.49	5372.75	4918.98	6682.38	5670.94	4611.67	4882.7	7638.1	6211.73	5121.07	6287.91	4654.29
VLPTIPK	P24368	Coatomer subunit beta'	5540.52	5371.15	5331.14	6052.97	6150.16	5096.4	5593.53	5483.48	5919.12	5635.55	4671.01	5634.73	6716.79	5949.32	6111.91	5952.59
LESTLNYGMER	P24623	Coatomer subunit beta'	910.165	2906.72	2388.49	2322.43	3133.29	1282.14	2464.44	1915.58	2826.97	1997.77	1700	1524.37	1596.94	2425.77	912.365	1300.67
IAYQLAVEAESEQK	P24942	Coatomer subunit beta'	3678.78	2710.65	1309.31	1905.08	1988.46	1753.16	2350.96	2893.14	1434.86	2154.78	1752.07	1912.75	1908.51	1402.24	2006.41	2071.6
SQVLFETEVSR	P25113	Heat shock 70 kDa protein 13	3641.17	1930.01	3519.69	2562.1	2623.3	N/A	2998.62	4007.72	2938.58	2955.43	3797.25	3673.99	N/A	2870.2	2545.79	3389.28
QAVQILQQVTVR	P25235	Endophilin-A1	8887.17	9354.77	6032.16	3740.92	6331.71	7814.56	6324.67	9282.28	5707.07	7477.06	6862.44	5568.26	8695.03	8758.55	8372.65	6498.88
ALYDFEPENEGELGFK	P25286	Endophilin-A1	11473.8	19014.8	17068.6	20363.7	21036.8	23221.8	14188.1	19171.5	9128.43	16599.3	15556.4	26047.9	20216.2	17767.9	22414.9	19772.8
QNFIDPLQNLHDK	P25809	Endophilin-A1	1780.68	1986.54	2651.06	2431.7	2176.64	1213.84	1649.89	1751.13	1987.19	2444.45	2155.29	1453.9	1971.41	3440.78	3967.09	1651.1
GPGYPQAEALLAEAMLK	P25886	Endophilin-A1	481.048	2640.64	4167.65	5509.46	5778.79	3497.6	2373.43	2300.91	1220.72	3533.61	599.116	N/A	1146.28	3001.51	1301.2	1881.38
ELGDDCNFGPALGEVGEAMR	P26051	Endophilin-A1	N/A	N/A	2172.13	2022.19	2028.68	1085.96	1602.29	982.206	1838.79	1455.63	830.604	1359.53	N/A	2302.15	810.213	1538.73
NFDEILR	P26284	Peroxiredoxin-6	7111.04	11975.8	10196.6	9706.44	9529.45	9179.52	10623.5	12826	7286.61	9822.33	13677.1	14257.7	10971.4	9475.64	10185.8	11990.2
DFTPVCTTELGR	P26453	Peroxiredoxin-6	8029.58	12491.9	10252.2	9953.87	9479.78	8741.45	7614.24	11667.4	6646.28	7014.22	13794.5	13724.5	7879.93	6934.37	9702.36	10331.4
VVFIFGPDK	P26772	Peroxiredoxin-6	2828.96	N/A	5645.25	3325.9	5120.47	3464.75	7544.67	4876.62	2484.57	5429.33	5406.84	N/A	4573.5	4118	3752.45	7733.2
LSILYPATTGR	P27139	Peroxiredoxin-6	11353.7	27040.2	17388	19641.6	19446.3	18558.8	15615.2	25822	14680.8	16295	23524.1	20789.9	22054.7	17640.9	16200.9	21916
PGGLLLGDEAPNFEANTTIGHIR	P27274	Peroxiredoxin-6	1040.68	2380.86	2363.82	N/A	2020.11	N/A	2112.35	2138.76	1004.07	1703.25	2375.96	N/A	723.34	N/A	681.502	1338.45
AIVQLVNK	P27605	Platelet-activating factor acetylhydrolase IB subunit alpha1	5399.14	9276.33	6493.13	6736.11	7985	7439.26	7041.27	7602.5	6974.88	6685.64	7392.52	6958.13	7813.07	8237.94	8673.25	8418.05
VVVLGLLPR	P27615	Platelet-activating factor acetylhydrolase IB subunit alpha1	2053.56	3853.99	2830.76	3073.16	4652.74	1179.43	1280.16	2955.68	4325.86	3316.22	2010.27	872.144	3350.19	3659.42	1896.43	2584.37
IIVLGLLPR	P27653	Platelet-activating factor acetylhydrolase IB subunit alpha2	1824.61	4847.29	3219.98	3866.36	8563.87	2623.79	2396.48	4208.54	6031.42	5934.93	4026.49	N/A	9442.81	5720.1	2250.44	2758.79
ELFSPLHALNFGIGGDTTR	P27791	Platelet-activating factor acetylhydrolase IB subunit alpha2	1649.04	5061.02	3582.02	2389.72	5317.19	995.748	2638.28	3846.2	3689.49	3815.48	5145.23	5059.64	5701.32	5799.54	3564.37	3429.46
LGIIGVVNR	P27867	Dynamin-1-like protein	11805.5	17211.8	15066.1	15983.2	23866.9	17858	17620	17833.5	19784.4	19018.7	13205.5	17858.7	24977.3	21058.5	20157.6	18247.3
SSVLESLVGR	P27881	Dynamin-1-like protein	11690.8	12259.8	10636.1	13856.2	12908.9	15258.4	13302.2	15238.7	13577.8	12476	12649	17718.5	18356.9	16050.6	17608.4	15934.2
YIETSELCGGAR	P27952	Dynamin-1-like protein	17576.9	12532.4	11107.2	12128.9	11052.3	13275.9	13003.4	12918.2	10007.8	11626.4	13255.1	13060.8	14611.6	12091.3	14458.7	14146.2
DIELQIR	P28023	Dynamin-1-like protein	12954	10117	7677.4	8935.11	8390.37	10399.4	10860.3	11148.7	7925.74	7474.69	8117.43	11407.7	9183.09	8271.91	12268.2	10666.7
SATLLQLITK	P28064	Dynamin-1-like protein	5035.76	7639.91	6200.68	8697.36	12513.5	7337.12	5359.04	7440.59	8561.69	8307.49	4888.37	5983.55	11945.8	9915.08	7511.61	8296.96
FATEYCNTIEGTAK	P28073	Dynamin-1-like protein	5978.47	4128.23	3638.46	4001.68	3537.06	4603.98	3929.34	3922.18	3298.44	4152.85	3679.72	5717.44	4441.63	3618.05	5123.71	4410.55
GVSPEPIHLK	P28075	Dynamin-1-like protein	4204.25	4704.53	4391.91	4750.19	4944.61	5017.13	5059.87	5094.22	4465.33	4710.17	4150.81	5319.89	5568.19	5112.14	5256.72	5923.81
INVLAAQYQSLLNSYGEPVDDK	P28480	Dynamin-1-like protein	1001.7	570.686	2751.03	3195.07	3322.36	2540.67	1727.08	1697.02	2121.28	2032.12	1492.95	3670.18	1809.49	1914.63	2816.68	2507.98
TLESVDPLGGLNTIDILTAIR	P28572	Dynamin-1-like protein	137.012	566.072	952.868	3216.71	N/A	808.42	1014.13	434.8	900.206	1050.96	440.455	1263.44	1005.44	451.988	1051.22	692.816
MEALIPVINK	P29066	Dynamin-1-like protein	522.065	3077.18	4379.15	7442.92	12256.4	7337.68	2185.04	1325.56	5554.27	2603.22	1343.59	4810.92	4961.26	4334.24	2013.65	3986.65
VPSALAPASQEPSPAASAEADGK	P29147	Dynamin-1-like protein	2534.89	1360.15	3404.68	5269.81	1997.7	4848.71	4041.07	3650.37	3910.29	3783.23	3535.08	5790.07	5205.48	4011.48	4744.74	3275.4
DTLQSELVGQLYK	P29266	Dynamin-1-like protein	5378.32	6530.51	8484.17	11308.8	10324	19017.6	10485.3	9695.4	6392.16	7165.97	7567.1	12693	14134.8	8984.25	15046.5	10649.3
SYFLIVR	P29314	Dynamin-1-like protein	5690.1	8223.21	5322.38	3695.11	10185.9	2745.91	8790.12	6772.69	6914.65	8589.94	5516.05	6706.92	12018.3	9138.36	7926.62	7367.2
IIQHCSNYSTQELLR	P29315	Dynamin-1-like protein	4171.17	3183.69	1967.02	1665.45	2074.06	973.152	1960.12	2124.15	1581.09	3121.33	1996.07	N/A	2029.31	2015.86	1253.28	1922.55
GHAVNLLDVPVPVAR	P29348	Dynamin-1-like protein	4992.54	4003.95	5850.49	6969.69	8068.74	6172.5	6807.9	6089.07	3966.8	8223.62	4733.32	5121.02	7065.58	7357.39	9088.67	6060.77
YDYVLTGYTR	P29410	Pyridoxal kinase	9275.36	8214.71	4415.55	4637.36	6193.3	5049.27	5420.68	6858.57	4693.41	4872.96	6089.26	5469.49	5891.68	6209.88	6648.43	5311.23
VLSIQSHVVR	P29418	Pyridoxal kinase	2249.72	3712.66	2590.03	3202.67	3164.86	3392.87	2521.79	2358.52	3036.18	3103.77	2895.03	1589.66	3664.57	4680.2	2799.65	2906.8
VVPMADIITPNQFEAELLSGR	P29419	Pyridoxal kinase	809.58	4577.74	19475.4	13761.5	33894.6	12783.8	3809.53	3389.61	4986.56	13749.4	4095.96	5811.94	3365.07	4827.08	5530.19	9710.94
KDIEDPEIVVQATVL	P29457	Pyridoxal kinase	4114.04	3545.44	3176.25	4447.17	652.643	3393.3	4770.28	6717.56	2797.23	1660.05	2765.89	3756.59	3024.24	2512.07	3637.8	3760.64
AEAGEGQKPSPAQLELR	P29975	Pyridoxal kinase	4024.22	4004.16	3659.08	3428.26	2324.16	3327.15	3226.93	4115.92	3569.69	3195.05	3614.22	3764.37	2917.73	3118.18	2590.74	3644.88
MGPDTVVITSSDLPSPK	P30009	Pyridoxal kinase	5508.99	12092	6621.39	5896.95	7450.87	8522.75	8927.76	8892.22	5224.31	4802.09	6326.01	9267.95	7794.76	8900.68	8466.13	8939.17
GSDYLMALGSQR	P30349	Pyridoxal kinase	2973.04	6812.47	8337.76	10111.9	10001.9	6594.65	4452.82	5110.46	6548.5	7169.01	4033.81	7054.01	6210.35	8059.34	4373.77	5310.67
FPTLGGR	P30427	Vesicular inhibitory amino acid transporter	38977.6	35691.6	42282	43732.4	44684.8	44210.5	46487.7	38917.8	50675.3	44279.4	41326.6	39724.3	51411.8	50899.2	49480.6	41648.3
SEGEPCGDEGAEPPVEGDIHYQR	P30713	Vesicular inhibitory amino acid transporter	17611.4	7599.4	8147.7	8906.93	9164.25	17689.3	14029.5	10493.3	8656.79	16759.9	9560.11	12472.4	18396.1	9922.47	15854.6	13913.2
EVITDNLPGSIR	P30835	Vesicular inhibitory amino acid transporter	65405.9	81168.8	70075.7	79323.5	75279.4	109167	99533.9	79996.2	78182.9	67737	64627.3	96289.5	89783.2	80905.8	92150.5	84557.7
AFFPACYGGDGR	P30839	Vesicular inhibitory amino acid transporter	28160.4	22370.3	19342.4	19888.1	20554.3	27451.6	27230	19647.7	20655.3	18618.4	21168.6	23360.6	26744.1	23296	27895.1	24950.8
DSYVAIANACCAPR	P30904	Vesicular inhibitory amino acid transporter	28098.9	24662.8	15403.2	15420.6	17308.3	20782.7	21772.8	20980.6	16451.8	14602.5	22636.9	21665.1	24870.8	22238.8	22780.6	22660.5
AVVNIFLVAK	P31000	Vesicular inhibitory amino acid transporter	2483.89	5857.75	N/A	2465.03	4731.92	2643.08	2455.58	3016.76	6386.2	4920.74	951.785	N/A	7117.27	7335.02	N/A	1327.12
NCILQLFGK	P31016	Medium-wave-sensitive opsin 1	6792.39	11548.1	7605.18	5313.52	12193	8652.21	5304.2	8643.04	11853.4	8018.93	8244.28	8542.62	10729.5	12212.4	8574.46	8468.59
GPFEGPNYHIAPR	P31044	Medium-wave-sensitive opsin 1	17357.7	12531.5	11959.9	7230.02	14676.6	9996.18	10810.6	14011.8	16323.4	11395.2	14212.8	11239.1	11513.6	12980.4	13664.9	12888.3
YWPYGLK	P31399	Medium-wave-sensitive opsin 1	22996.1	10390.2	3668.08	N/A	N/A	5377.14	6908.51	9051.49	9601.14	4277.2	9647.56	8257.15	8276.15	10209.4	8918.05	9114.75
SATIYNPIIYVFMNR	P31421	Medium-wave-sensitive opsin 1	1978.83	11461.8	1468.12	1589.56	4837.53	6290.67	1614.28	5251.03	N/A	4085.67	N/A	7518.88	25688.2	10077	9881.88	8010.88
NILTEIYR	P31596	Ras-related protein Rab-11B	11142.2	12124.2	9209.26	7875.21	8552.61	7827.31	9571.01	9515.83	7329.67	7783.51	9575.18	11107.7	9107.7	9884.29	11986.6	11097.8
INAEFLR	P31646	Rab GTPase-binding effector protein 1	N/A	28147.9	35672.1	39516.7	35218.5	40002.3	27721.9	34235.1	66386.1	27996	N/A	32809	30601.2	39431.9	39319.6	45851.7
DGQVIGIGAGQQSR	P31647	Bifunctional purine biosynthesis protein ATIC	33727.9	30551.7	31893.2	28276	34458	28924.4	29361.4	32326.2	31319.6	28694.2	38461.2	33752	30369.7	29419.5	36399.5	32900.5
TGLVEFAR	P31662	Bifunctional purine biosynthesis protein ATIC	25682.7	25694.7	22554	21342.2	24031.6	24774.4	24372.9	25975.8	22376.4	21727.9	23583	29006.5	24298.4	24257.8	29036	29719.2
GAVDIPAAASFK	P31977	Bifunctional purine biosynthesis protein ATIC	18058.7	19808.3	20567.7	20224.5	21778.1	19464	23395.1	22909	18387.6	17810.4	17617.4	22776.7	21092.2	17404.1	21206.4	20336.4
SLFSNIVTK	P32198	Bifunctional purine biosynthesis protein ATIC	12535.7	10064.8	8889.87	8816.35	10392.6	8913.17	8340.96	11004	8702.25	9745.71	10238.3	9862.93	11711.7	9274.09	8291.73	10622.2
LSGVSVSSDAFFPFR	P32551	Bifunctional purine biosynthesis protein ATIC	4061.11	9265.83	6604.27	10537.7	12121.6	12409.7	5455.04	6321.39	8866.37	7817.66	4426.3	6473.83	11683.2	9802.25	6637.59	6732.18
LDFNLIR	P33124	Bifunctional purine biosynthesis protein ATIC	4720.58	7146.64	7798.42	7218.23	7166.28	6799.63	7659.56	8749.53	6696.15	6623.84	6842.57	9076.92	8812.34	7261.05	7344.08	10412.9
ALFEEVPELLTEAEK	P33578	Bifunctional purine biosynthesis protein ATIC	3405.38	13004.3	7112.79	8112.15	13297.4	27310.5	4592.71	4959.91	5159.59	5403.24	5640.75	11785.2	8849.23	5283.54	9323.36	9128.5
DLPESALR	P34058	Bifunctional purine biosynthesis protein ATIC	8418.99	10800.5	9849.87	10436.8	11525.4	10140.4	10181.5	6176.39	10361.5	10789.2	10526.6	N/A	11368.1	9912.99	11352.9	11454.5
EVSDGIVAPGYEEEALK	P34064	Bifunctional purine biosynthesis protein ATIC	19711.3	20118.2	15165.4	20628.4	19378.9	31944.4	23693.2	31139.4	15938.9	17003.4	22095.3	33456.7	27134.3	22437.3	28526.2	28707.3
HVSPAGAAVGVPLSEDEAR	P34067	Bifunctional purine biosynthesis protein ATIC	15216.4	12972.9	11476.5	12405.9	13978.2	11145.8	14870.4	14164	13071.8	13777.5	13124.5	12995.8	12509.9	11361.3	12772.4	12878.1
SGVAYIVAPSGSTADK	P34926	Bifunctional purine biosynthesis protein ATIC	24783.1	10823.1	9777.18	9569.88	10034.5	9925.88	11506.2	9363.14	9583.19	9124.22	11256.6	10982.7	12551.1	8964.96	11122.9	11021.6
AFTHTAQYDEAISDYFR	P35213	Bifunctional purine biosynthesis protein ATIC	6023.22	4193.66	3521.7	1603.49	3390.26	N/A	5317.85	4761.42	2761.87	4040.98	4170.24	3463.78	3939.1	3985.33	4235.39	4840.97
DLIVATIAVK	P35234	Bifunctional purine biosynthesis protein ATIC	4483.32	2666.63	1779.21	2681.25	3054.56	N/A	2779.24	3603.15	3469.01	2820.62	1786.31	1691.42	2776.44	3264.26	2488.12	2351.9
DVSELTGFPEMLGGR	P35280	Bifunctional purine biosynthesis protein ATIC	1371.72	6791.41	8993.87	10091.9	13505	12807.2	5828.96	7394.99	7805.96	7072.02	2376.48	9398.09	5663.95	9456.2	2832.22	8634.82
ALTSELANAR	P35284	Moesin	11909.1	12791.7	12624.8	14606	11938.2	12476.5	12917.4	14118.5	13043.6	8993.63	12904.4	15471.9	13993	12853.5	14524.5	14857.2
EDAVLEYLK	P35427	Moesin	5948.61	7186.8	5338.06	7369.94	5717.13	7961.24	7597.57	6683.93	5523.79	4932.7	6818.67	8153.68	7455.26	7131.12	7494.35	8315.39
FYPEDVSEELIQDITQR	P35434	Moesin	1517.38	3334.75	3948.01	4292.34	6149.79	8258.84	2623.39	2272.45	6054.17	4889.54	2698.21	4464.42	5569.77	3102.58	3381.4	8218.01
EGILNDDIYCPPETAVLLASYAVQSK	P35435	Moesin	529.353	1382.95	1129.78	1429.17	N/A	2125.39	1305.39	838.929	1356.78	N/A	1192.45	1010.57	1259.16	1424.64	1108.6	1385.67
TLLSDPTYR	P35446	Stress-induced-phosphoprotein 1	29084.9	39931.4	33636.8	30067.2	34001.9	33868.5	38563	47369.5	26949.5	36346.2	41993.2	44662.4	47249.2	36508.1	43363.8	41457.8
AAALEFLNR	P35465	Stress-induced-phosphoprotein 1	15422	13494.9	12554.9	10153.4	12281.1	13797.5	13328.7	16792	9254.15	13439.3	18010.9	17168.8	15291.4	12674.6	17538.5	16122.1
LDPQNHVLYSNR	P35559	Stress-induced-phosphoprotein 1	1381.84	1183.45	1280.11	1275.95	1801.66	1626.51	921.22	1876.58	804.178	1535.48	2144.59	N/A	1041.64	877.398	1184.05	1282.76
ALSAGNIDDALQCYSEAIK	P35565	Stress-induced-phosphoprotein 1	2922.14	3788.24	1760.92	1477.71	2172.58	4230.42	2533.06	4255.02	912.562	1674.81	2741.38	5235.1	3943.44	2915.13	4028.55	3587.88
DPQALSEHLK	P35571	Stress-induced-phosphoprotein 1	7222.99	10901	3582.52	7042.97	7262.83	8545.51	4104.04	13294.7	2139.54	3834.6	11017	12475.7	11676.8	9968.23	11984.4	11893.7
LAYINPDLALEEK	P35704	Stress-induced-phosphoprotein 1	13270.9	18717.6	20087.5	17472.7	24027.6	33563	23937.6	29361.3	17538.7	17353.5	24549.6	36416.8	29189.5	19738.9	26471	27321.8
DCEECIQLEPTFIK	P35815	Stress-induced-phosphoprotein 1	3109.99	4368.37	4251.59	3885.28	5178.39	6656.6	3824.77	5728.24	2060.9	3599.44	5745.62	7755.18	5367.74	4425.87	5108.41	4764.6
ELIEQLQNKPSDLGTK	P36506	Stress-induced-phosphoprotein 1	6528	6130.86	8209.79	6959.01	7965.01	7661.5	7032.59	7960.86	5497.75	7839.03	8556.85	8794.81	8171.85	6128.73	7536.01	7857.23
LILEQMQK	P36510	Stress-induced-phosphoprotein 1	12687.5	11933.7	12070.2	13752.2	7962.29	15740.6	N/A	16744.2	11374	N/A	19370.1	15361.6	15447.8	N/A	18654.5	11287.5
LMDVGLIAIR	P36876	Stress-induced-phosphoprotein 1	766.856	4416.28	3104.41	2419.14	5434.73	N/A	2862.8	2860.6	3208.59	4342.17	1789.37	N/A	2535.2	2765.82	913.153	3373.81
KAAALEFLNR	P36970	Stress-induced-phosphoprotein 1	513.213	2637.22	1969.06	N/A	2479.5	1830.05	1709.39	1849.09	1904.63	2224.69	2264.45	1409.31	N/A	2394.94	N/A	1678.88
SPSLLQSGIR	P36972	Myb-binding protein 1A	5755.71	4564.44	5806.66	6068.77	5976.69	6288.52	6726.55	5930.52	5059.67	5869.9	6132.56	6897.35	6306.4	5395.02	7610	5564.06
LITGLGVGR	P37136	Myb-binding protein 1A	4378.49	4218.87	3915.1	4760.36	5000	4997.25	4163.52	4973.7	6063.91	5626.83	4392.55	N/A	5913.18	4495.5	5412.72	4408.43
EVLEEGLLK	P37199	Myb-binding protein 1A	2196.57	1448.55	2789.15	2593.44	2306.91	2477.14	2206.09	2514	2633.88	2314.2	2127.48	2869.24	2626.54	1929.17	1676.47	1762.69
DEAVVEQIAR	P37285	Myb-binding protein 1A	3315.99	N/A	3189.43	4174.86	N/A	4312.52	3350.94	2934.55	2526.42	3135.26	3245.95	2713.55	N/A	2495.53	3567.45	3279.93
ALDLIEVLVTK	P37397	Myb-binding protein 1A	1193.09	1498.16	1557.51	1855.99	4441.22	2556.32	1695.68	1657.54	2075.34	1821.23	1177.24	2944.84	2333.23	1879.02	1782.14	2253.01
ILEVHVDK	P37805	DnaJ homolog subfamily A member 2	1920.5	2798.5	2947.26	3070.2	1958.78	3111.2	3026.45	3513.74	2863.37	2537.19	2656.4	3277.61	3495.55	3317.64	3336.39	4512.36
EISFAYEVLSNPEK	P37996	DnaJ homolog subfamily A member 2	3049.35	3211.21	3952.61	3801.57	2915.21	N/A	4681.92	4618.78	2921.45	3115.62	3423.8	3772.47	3600.57	3071.33	4228.84	3205.82
SSPLPLQDGPGPEGGR	P38062	Coronin-7	3140.5	2142.24	1654.45	2360.49	2980.36	2178.62	2282.25	2056.89	2047.26	1759.18	1996.64	2458.7	2995.67	2157.37	2579.35	2182.16
ENTELTQPLR	P38650	Afadin	2391.08	N/A	3023.79	3145.97	2498.43	3550.31	3252.63	1760.05	3286.66	2445.64	2489.56	N/A	3401.51	2624.85	2653.3	2131.52
LAAGDQLLSVDGR	P38652	Afadin	1529.17	1822.72	2195.52	2694.93	1705.77	2001.85	2858.87	1950.03	1863.03	1593.65	1794.41	1790.74	N/A	1772.44	2540.42	N/A
TPAAVLPTPVAVSQPIR	P38656	Afadin	721.973	1317.05	2139.18	3338.59	1404.72	6262.39	2681.9	1396.03	N/A	1933.06	1382.46	N/A	3149.92	1548.83	5363.32	2133.62
GGAVVDEGPTGIK	P38659	Monocarboxylate transporter 4	12410.1	10705	11193.6	12095.7	9519.56	11636.6	11396.9	12025	14455.9	8782.16	12209.1	13377.6	11518.5	11999.4	13558.3	11336.1
ALLEVLGR	P38718	Hydroxyacylglutathione hydrolase, mitochondrial	13004.5	17606.5	12962.8	13847.6	13345.5	15686	15306.8	14375.9	14246.9	12101.1	12591.7	20638.5	18746.3	16399.5	18572.8	19745.7
AVAEVLVR	P38983	Endophilin-A2	4207.2	8086.8	7013.62	7539.22	7829.04	9208.09	8200.97	7884.74	5278.16	7198.17	7383.12	8408.78	8495.62	6889.33	9338.13	10808
EFVAVTGAEEDR	P39052	NSFL1 cofactor p47	5588.57	2018.09	4462.9	5093.67	3833.12	6009.24	5697.51	4762.76	2044.75	4766.93	4926.85	4616.59	7425.71	3166.78	9032.13	4879.47
SPNELVDDLFK	P39069	NSFL1 cofactor p47	834.151	1038.62	1479.26	1700.34	1556.78	N/A	1182.8	1847.72	692.341	1306.8	1477.63	N/A	1922.7	914.038	2518.52	898.912
LGAAPEEESAYVAGER	P40112	NSFL1 cofactor p47	2483.18	3657.75	3777.95	2113.22	2880.34	3455	3538.83	3868.97	1781.29	3256.85	3637.08	3920.36	3861.1	3322.42	4009.36	2016.18
ASSSILINEAEPTTNIQIR	P40241	NSFL1 cofactor p47	841.117	889.505	742.362	478.149	658.504	1741.87	N/A	N/A	N/A	859.558	1471.51	N/A	1264.2	475.929	1279.33	1257.76
EANLLNAVIVQR	P40307	NSFL1 cofactor p47	3485.92	5232.56	4819.47	3992.73	5222.85	5336.88	4658.3	5151.69	3602.94	2213.32	5770.07	4768.75	6536.91	4444.39	6584.37	4990.56
DLIHDQDEEEEEEEGQR	P40329	NSFL1 cofactor p47	3049.74	1887.49	420.735	1090.2	840.444	1322.4	2009.77	2324.98	N/A	2072.78	2679.94	1725.62	2463.23	2336.49	4205.41	3065.18
SYQDPSNAQFLESIR	P40615	NSFL1 cofactor p47	4129.85	3191.09	2007.64	1899.26	1729.77	3791.18	3269.93	3910.41	N/A	2475.95	4939.08	4412.59	3182.72	2892.01	3924.89	3418.65
LSIEDFTAYGGVFGNK	P41123	V-type proton ATPase subunit S1	696.487	532.073	510.447	610.676	N/A	N/A	257.073	456.498	N/A	786.204	689.957	845.884	N/A	730.404	383.816	839.234
GPTITLTQIV	P41498	V-type proton ATPase subunit S1	944.45	895.846	4280.62	6437.28	7451.25	7282.36	3022.82	3234.56	4005.27	5091.19	2721.8	6310.83	4446.16	4025.71	3561.23	4659.18
DPVLSGAIATK	P41499	Choline/ethanolamine kinase	4619.22	3966.28	4359.87	5626.3	N/A	5231.15	4642.43	4393.95	4677.23	4959.56	3712.99	N/A	4479.3	4684.51	4991.75	5280.34
VILTAEVSGGSR	P41542	Sortilin	3038.55	2777.32	1760.31	2635.91	2254.56	3056.84	1933.73	1615.88	2880.8	3400.46	2049.3	1714.95	2587.78	1873.04	1323.6	1869.08
SSLESIPLALLPAAAAGASTGEDTAGAGPR	P41562	Exocyst complex component 8	302.837	538.379	1485.46	1718.92	2013.77	N/A	N/A	459.526	904.625	756.099	935.844	849.551	671.612	915.437	1102.73	732.866
IQVLPYK	P41565	Xaa-Pro aminopeptidase 1	9977.66	7245.7	8890.11	10882.6	11258.1	11294.7	10532.3	10695.2	11864.8	9991.53	8702.53	9023.44	10514.7	10199.9	9957.91	11341
TLCADLSPR	P42123	Xaa-Pro aminopeptidase 1	12422.3	10482.7	9790.3	9509.58	9680.22	11363.1	9590.02	11665.4	10828.8	9468.11	10329.1	11952.4	9173.38	9589.08	12028.1	9841.23
ASYAVSEAIPK	P42346	Xaa-Pro aminopeptidase 1	7277.75	6967.1	6095.68	6503.3	6746.54	7200.66	7251.72	7759.5	6598.32	6218.17	7855.34	7056.91	7536.09	6670.44	7596.8	7011.38
GHLLDSFAR	P42667	Xaa-Pro aminopeptidase 1	3536.17	5780.29	3383	2449.6	3967.85	2907.71	5073.52	4534.55	3915.03	5488.21	5726.69	4840.38	5003.33	5506.26	5033.71	4869.45
GSLTFEPLTLVPIQTK	P43138	Xaa-Pro aminopeptidase 1	4787.02	16209.3	13892.2	12976.2	39501.9	41957.6	7205.63	9508.68	18388.2	9117.83	10439.2	18820.9	29117	17372.6	13838.3	15179.7
IENVVLVVPAK	P43244	Xaa-Pro aminopeptidase 1	6383.21	8794.95	8397.82	8951.02	10016.5	8935.85	10008	11968.1	9314.75	8147.5	10197.8	11535.3	10605.2	9441.35	11542	11310
NLYSLDLSDLPLDK	P43245	Ral GTPase-activating protein subunit alpha-1	534.999	806.715	N/A	1681.67	1348.04	1935.69	914.579	N/A	504.139	910.949	1025.9	1679.71	1511.76	945.196	N/A	1042.1
GDYAPILQK	P43425	Dipeptidyl peptidase 3	11942.5	10359.2	8690.4	10763.2	9718.99	12003	8505.1	10850.2	11086.4	9981.77	9435.43	10888.7	10335.6	9858.28	12240.1	11691.2
LVASAEQLLK	P45479	Dipeptidyl peptidase 3	7317.39	5662.96	7691.51	9054.55	8179.1	9097.53	6219.8	8375.26	8221.53	8464.88	7385.95	8849.94	8966.9	9064.09	7498.11	7197.69
FVPNLPK	P45592	Dipeptidyl peptidase 3	8382.07	8649.88	9663.34	11659.3	10077.7	N/A	10064.1	10081.3	10909.9	9316	10868.9	10514.3	9773.05	9904.14	11645.7	11750
FSTIASSYEECR	P45953	Dipeptidyl peptidase 3	3946.4	2559.15	2006.49	2410.99	2192.93	3194.08	2350.07	3125.47	2182.9	2030.23	3438.77	3098.1	2114.59	1614.16	2288.06	1786.01
LASVLNTEPALDSELTSK	P46101	Dipeptidyl peptidase 3	2829.97	2146.34	2382.47	2942.95	2195.91	4205.94	2051.98	2822.39	1896.34	1839.44	2612.22	N/A	N/A	1753.58	3151.98	2614.54
LEGSEVQLVEYEASAAGLIR	P46413	Dipeptidyl peptidase 3	958.753	602.73	2073.15	1603.8	1703.99	1340.96	1120.41	2005.23	1642.91	925.172	977.541	2837.05	1848.71	1451.88	2471.54	1917.58
YSLIDPASAPELLR	P46462	CAP-Gly domain-containing linker protein 2	2138.06	2214.73	2594.94	2996.38	2650.12	3907.08	2906.47	2521.28	2319.55	2732.53	2721.07	4307.21	4800.51	2760.16	2962.86	2935
LNLVDLAGSER	P46844	Kinesin-like protein KIF3C	2286.13	2848.89	2205.94	1652.99	3024.9	2220.12	1788.22	2076.15	2757.84	2275.27	2998.64	N/A	3475.77	1674.85	1613.4	1933.21
GLAPEQPVTLR	P47198	Acyl-coenzyme A thioesterase 2, mitochondrial	2229.44	11291.1	11980.2	3361.85	8063.45	N/A	24625.4	9735.99	5028.72	6759.95	6861.92	9699.59	2994.22	2267.41	2449.14	N/A
LINIDFTDPDESK	P47245	Prolyl endopeptidase	4068.92	3732.84	4394.88	4904.06	3057.11	6324.95	4821.77	3911.58	3375.37	3266.31	4389.84	3975.56	3051.14	3727.98	4719.16	5699.6
ELPDVLER	P47709	Prolyl endopeptidase	3537.8	2803.41	3707.19	3511.5	3981.92	3996.68	3550.47	3032.52	3741.19	3535.74	3816.08	3474.63	3016.05	3572.17	4703.92	2764.8
VLYVQDSLEGEAR	P47727	Prolyl endopeptidase	2684.32	1613.1	1529.43	1579.97	788.166	1151.67	1357.32	1937.3	1722.12	1685.35	1310.32	1041.69	1574.86	N/A	873.876	1180.04
VFLDPNTLSDDGTVALR	P47728	Prolyl endopeptidase	1007.93	2156.94	1728.78	1582.05	1283.82	N/A	1245.09	1031.06	1436.19	1593.15	955.38	1102.87	N/A	1289.39	1106.63	1742.48
VTVVDVNEAR	P47819	UDP-glucose 6-dehydrogenase	3472.17	3439.84	4057.84	5145.3	4290.17	4557.29	4975.69	4946.24	3407.2	4722.3	4368.15	4874.62	4672.72	4328.75	4373.43	4651.51
VLQTQLDTLR	P47858	Tripartite motif-containing protein 3	2927.7	2238.43	4012.07	4280.35	3750.3	3503.77	3507.64	N/A	3470.09	3727.28	3104.14	4482.81	3555.65	2924.29	2310.37	3247.67
DLAPIGIR	P47860	3-hydroxyacyl-CoA dehydrogenase type-2	4306.5	7003.39	5108.78	4846.26	5712.41	4884.07	5963.99	5338.49	3395.99	4383.79	4919.39	6713.65	4294.68	5756.71	5533.53	7275.28
LGGNCIFAPANVTSEK	P47863	3-hydroxyacyl-CoA dehydrogenase type-2	2878.62	4012.25	3202.57	N/A	3823.08	2370.34	3953.48	3942.3	1728.98	3131.25	4547.63	3679.49	N/A	2871.24	N/A	4460.7
VVTIAPGLFATPLLTTLPDK	P47942	3-hydroxyacyl-CoA dehydrogenase type-2	111.402	N/A	1988.43	2074.06	9574.86	1435.98	497.579	310.724	N/A	2643.55	582.146	N/A	2245.3	2175.18	643.999	1187.97
NFLASQVPFPSR	P48004	3-hydroxyacyl-CoA dehydrogenase type-2	2398.87	4535.66	4505.28	3234.83	4925.05	2943.09	2749.49	3818.16	2019.92	3347.74	3458.16	3718.61	3007.94	4216.09	2425.1	3783.03
GLVAVITGGASGLGLSTAK	P48037	3-hydroxyacyl-CoA dehydrogenase type-2	1626.79	4373.32	1849.4	2508.9	2771.98	N/A	1296.29	1623.61	1515.2	3001.33	1529.96	N/A	2527.91	3092.57	N/A	1442.77
LGYISVVDTLK	P48450	Ankyrin-3	5326.96	6686.71	7746.67	7854.07	8341.74	10452.4	7406.98	7676.19	9358.79	6098.39	6263.13	10403.2	7196.27	7086.45	7034.72	8601.33
YLVQDGAQVEAK	P48500	Ankyrin-3	4438.26	2677.36	2161.81	2825.28	1915.46	3078.57	2273.72	3101.81	2791.56	2348.32	3263.73	3332.72	2558.3	2178.59	1476.51	2468.53
VGLQAQPVPEETVK	P48679	Ankyrin-3	3349.05	3113.29	3828.38	3725.31	3786.14	4255.96	4603.98	4869.54	3599.42	3742.83	3757.81	4941.67	4265.63	3536	3610.12	3758.64
DFPQYFAVVSR	P48721	Ankyrin-3	5278.34	4867.19	7395.54	7929.08	9412.7	10639	7342.2	7183.45	8471.53	5974.4	6741.41	11249.2	11042.4	7616.32	7493.62	8517.17
ATFSPIVTVEPR	P49088	Ankyrin-3	2859.84	3888.06	2970.39	2793.45	3095.64	3141.5	4070.2	3442.39	2530.1	2942.74	3004.2	N/A	3909.11	2658.47	N/A	3258.18
VNAPLLSQR	P49134	Inward rectifier potassium channel 13	2934.71	2707.75	4048.84	3159.23	3095.62	2150.9	N/A	2249.69	3153.96	2649.06	4022.65	2855.88	N/A	2652.52	2891.26	2901.91
FTDLAVVAHK	P49242	Inward rectifier potassium channel 13	1471.22	1277.06	2066.62	1774.54	1637.16	N/A	1157.54	1064	1771.25	1239	1794.98	1398.2	N/A	1650.18	N/A	1480.07
QLVALLR	P49432	Epsin-1	3227.55	2690	3322.07	4655.18	4637.9	3301.3	3879.14	2548.75	2983.67	4905.44	3681.29	3656.16	6183.89	4264	5011.58	3533.58
TALPTSGSSTGELELLAGEVPAR	P49655	Epsin-1	2460.08	N/A	4102.4	9209.89	5362.84	12200.6	6819.68	4614.73	3141.78	5478.66	3951.25	6114.3	7923.44	5022.78	8474.75	4304.97
FGIDDQDYQNSVTR	P49793	Phosphatidylinositol 5-phosphate 4-kinase type-2 beta	1664.9	651.846	1221.02	1314.6	1412.1	778.481	1272.14	1158.22	548.581	883.952	2135.08	N/A	854.5	892.683	1289.27	1101.54
SEPVKEEGSELEQPFAQATSSVGPDR	P49803	Scaffold attachment factor B1	3846.16	1584.99	1888.24	2558.66	N/A	4278.68	N/A	1963.46	2799.85	945.206	2566.96	2294.2	1338.29	1928.89	3606.7	1767.78
ILDILGETCK	P49805	Scaffold attachment factor B1	2122.19	N/A	3178.57	4292.77	1261.58	4798.41	N/A	1964.23	3536.3	1773.56	3795.5	2642.24	N/A	3793.3	5677.33	3607.09
GVPVISVK	P49911	Scaffold attachment factor B1	2673.41	1456.45	2769.55	2547.76	1141.63	3590.18	947.435	2415.03	4873.74	1308.42	3792.58	2551.15	1993.89	2909.89	3006.36	2295.32
FEFTPGR	P50137	STE20/SPS1-related proline-alanine-rich protein kinase	7803.14	6028.58	6586.57	7261.58	8025.3	7721.1	6902.81	7431.85	5623.96	7103.93	6727.64	5457.39	8644.28	7505.91	10342.8	6767.53
DVSVPVAEIK	P50398	Phosphofurin acidic cluster sorting protein 1	4042.03	5849.76	5907.05	8281.64	6784.69	7025.93	7340.8	5844.21	5663.55	5977.33	5546.29	7314.15	9188.93	6751.12	8161.95	7099.77
AFSDPFVEAEK	P50399	Heat shock 70 kDa protein 4	51791.1	49470.4	46653.1	51575.3	50349.5	65012.3	54803.6	55993.8	60681.9	41462.7	51517.6	64582.5	60286	51404.5	59075.2	50395.3
QSLTADPVVK	P50475	Heat shock 70 kDa protein 4	30563.6	27864.1	29191	31475	26129.3	32071.9	27141	31447.2	34733.2	26841.2	28979.3	33476.8	36319.1	29914.6	32339.2	31472.1
CTPACVSFGPK	P50503	Heat shock 70 kDa protein 4	14212.5	14163.3	12029.9	14241.6	14670.6	14106.2	13359.4	14853.1	14311.1	14081.4	15281.5	17930.5	17476.7	14552.5	16528.6	12510.8
SNLAYDIVQLPTGLTGIK	P50554	Heat shock 70 kDa protein 4	11746.7	21984.1	15981.8	29988.2	41680.5	44590.6	10076.4	11602.5	22908.2	18756.6	12141.5	24249.9	31276.8	22590.5	22198.9	20041.9
QDLPALEEKPR	P50878	Heat shock 70 kDa protein 4	14367.8	14361.1	17553.4	19002.4	18804.5	20914.7	19090	20774.7	20731.7	15508.4	18685.6	22309.9	18653.7	20438.6	23625.3	18794.3
EDIYAVEIVGGATR	P51111	Heat shock 70 kDa protein 4	17176.1	35557.8	19533.6	16938	15975.4	21042.8	23234.7	25215.4	20892	14646.4	20294.7	30285.7	23670.1	18315.3	26285.9	23704.7
LKETAESVLK	P51158	Heat shock 70 kDa protein 4	3089.11	3558.35	3499.96	4218.93	2935.35	8433.63	7739.03	4457.45	4197.77	2755.71	3945.26	8200.32	4570.51	4618.98	4010.6	7263.4
HAEQNGPVDGQGDNPGTQAAEHGADTAVPSDGDK	P51489	Heat shock 70 kDa protein 4	4683.62	3168.21	1816.78	1713.38	2536.02	N/A	1755.23	1703.08	2456.69	2708.1	2269.37	1365.42	N/A	1433.74	1448.97	1734.34
EFSITDVVPYPISLR	P51583	Heat shock 70 kDa protein 4	15051.6	107860	31650.6	49083.4	97334.6	142204	19860.9	16259.4	33937.7	43861.4	21678.4	48531.6	108251	31558.3	83414.3	39483.5
ELSTTLNADEAVTR	P51635	Heat shock 70 kDa protein 4	48350.4	33832	15998.7	17169.4	22785.2	18016.6	32841.8	37751.4	17119.8	23784.6	16426.8	37031.6	35054.2	31704.8	37249.3	30577
AGGIETIANEYSDR	P51647	Heat shock 70 kDa protein 4	96525.2	125648	85614.4	105138	107775	139942	102311	133926	114282	83610.3	115091	159039	149632	113268	149063	119590
VLATAFDTTLGGR	P51650	Heat shock 70 kDa protein 4	60547.1	74315.4	50506.9	72060.8	59502	81934.8	64730.2	74005.3	73529.5	55898.3	55941	81972.9	75724.2	63854.9	78081.2	76677.2
LFEELGK	P51792	Heat shock 70 kDa protein 4	33981.6	31525.1	29225	35145.8	31656.1	39001.9	31225	32001.2	41133.8	28310.3	26754.2	37134	34963.7	31434.4	35591.7	36179.8
EMLGLYTENEGK	P51840	Heat shock 70 kDa protein 4	17760.8	29489.9	32539.1	35456.1	38347.1	26791.1	24852.8	24400.9	37870.6	26292.2	25533.7	27913.3	29015.6	31130.1	25279.6	26577.7
MQVDQEEPHTEEQQPQTPAENK	P52287	Heat shock 70 kDa protein 4	5466.06	4859.63	10990	9206.94	10788.1	5268.21	4274.55	9648.22	5322.32	3657.31	6336.57	9507.88	6995.25	5261.71	11834.3	5093.56
FLEMCDDLLAR	P52296	Heat shock 70 kDa protein 4	2337.62	5230.12	7579.04	7459.36	6725.08	5845.45	6655.08	5220.43	7057.48	5874.99	4072.7	4410.24	4259.42	6042.42	3570	4160.46
FVSEDDRNNFTLK	P52303	Heat shock 70 kDa protein 4	5157.22	2042.67	3350.57	4451.22	4963.44	3642.6	3451.71	3428.62	4815.7	5095.9	4463.28	3699.55	3673.39	4153.9	3501.59	2715.88
LMNETTAVALAYGIYK	P52481	Heat shock 70 kDa protein 4	1273.63	3836.48	2731.03	3052.4	4838.38	1613.24	1873.53	2760.53	3259.15	3223.87	1888.47	2917.71	2543.46	2639.73	2801.56	1411.53
KEDIYAVEIVGGATR	P52555	Heat shock 70 kDa protein 4	4893.08	4322.37	2663.43	2508.96	3009.77	2894.24	4502.26	4197.35	3155.83	3337.04	4306.95	4763.47	3310.89	3483.48	3664.77	3568.86
SVMDATQIAGLNCLR	P52632	Heat shock 70 kDa protein 4	2172.4	4204.16	2452.69	6231.38	3931.51	4949.59	3548.69	3664.47	2973.04	2295.93	2761.63	4260.53	4690.95	4036.85	3552.65	4339.01
KPVVDCVVSVPSFYTDAER	P52873	Heat shock 70 kDa protein 4	26830.4	28937.2	22678.8	23448.3	22603.4	23896.5	27164.1	23373.3	23271.4	20862.3	23444.8	26925.9	28546	23313.3	30493.3	22611.1
NAVEEYVYEMR	P52925	Heat shock 70 kDa protein 4	3375.37	12278.5	5381.4	6260.86	7091.72	9631.62	9490.08	9122.31	7386.12	5599.85	5541.79	10267.2	8495.3	9238.91	6289.01	7365.41
LSDISPIGR	P53042	Kinesin-like protein KIF1B	1544.63	N/A	2057.49	1711.57	1432.5	1148.13	1340.13	N/A	1629.72	1368.78	1527.55	N/A	1957.35	1837.44	1408.3	1289.31
CIIQMQGNSTSIINPK	P53534	Kinesin-like protein KIF1B	7705.98	10663.1	5767.48	3425.41	5676.43	1687.87	5786.74	6445.18	4146.13	4399.77	9889.26	5509.44	4669.19	6235.7	7650.61	9166.55
VSTAVLSITAK	P53678	26S proteasome non-ATPase regulatory subunit 1	11984.1	14268.4	10995.3	15842.8	16109.8	16857.6	16223.8	12447.6	19496.3	15112.5	9674.43	8125.93	16026.5	14194.5	12049.3	13940.1
QAIGIALETR	P53812	26S proteasome non-ATPase regulatory subunit 1	12694.9	11082.6	7722.33	9655.14	10426.5	10150.5	9879.25	12137.7	11721.4	10513.3	8700.23	9052.3	12873.8	10922.2	11955.6	10183
QFAALVASK	P53813	26S proteasome non-ATPase regulatory subunit 1	5456.19	5090.45	5443.56	5606.3	5323.63	5215.36	6439.02	5694.66	6048.81	6001.17	6055.37	6017.38	7229.78	5820.54	5685.58	6398.73
AAVESLGFILFR	P53987	26S proteasome non-ATPase regulatory subunit 1	1977.52	6427.97	4900.24	2015.22	11066.6	1803.57	3342.77	4340.43	5380.44	5674.35	3147.77	6679.12	8892.47	6514.76	3972.66	4905.12
IEVLYEDEGFR	P54275	26S proteasome non-ATPase regulatory subunit 1	2749.61	N/A	3411.41	3864.56	2253.07	N/A	2199.33	2598.79	2293.36	3311.39	3163.11	3834.88	N/A	2127.04	3017.57	3193.67
TVGTPIASVPGSTNTGTVPGPEK	P54290	26S proteasome non-ATPase regulatory subunit 1	3113.34	4538.7	1957.86	2257.28	2889.02	3138.55	3730.77	2768.44	2480.89	2152.7	2486.87	4465.61	3800.65	3757.42	4156.44	2397.41
LLHVAVSDVNDDVR	P54311	26S proteasome non-ATPase regulatory subunit 1	9823.17	5438.67	3657.31	4816.46	4704.18	6632.18	6831.81	6919.06	8881.69	4376.23	3665.46	8095.53	4057.68	6562.47	7017.5	7316.05
QDVYDLLK	P54313	26S proteasome non-ATPase regulatory subunit 1	2798.79	N/A	2948.9	3032.22	3024.92	4012.9	1631.92	2058.22	2957.95	2699.14	2573.85	2263.18	2971.22	1947.49	1845.09	2040.16
DTSEDIEELVEPVAAHGPK	P54319	26S proteasome non-ATPase regulatory subunit 1	8741.81	10207.3	13371.3	14341.3	13610.3	21791.2	14023.8	12886.7	12817.7	9653.81	10340.4	20874.9	16093.6	11354.9	15672.1	15552.9
MEEADALIESLCR	P54690	26S proteasome non-ATPase regulatory subunit 1	839.886	948.007	1169.29	2321.49	1106.28	978.127	1142.39	669.869	1404.19	1875.28	908.03	N/A	1111.64	1002.92	816.153	N/A
DGLILTSR	P54921	Parkinson disease protein 7 homolog	100422	124726	106768	85395.3	104286	97786.9	98171.9	129382	87585.1	91419.3	117593	132789	103015	108518	114257	119845
ALVILAK	P55016	Parkinson disease protein 7 homolog	79948.6	72663.9	54502.3	47763.6	71125.5	80931.4	57329.9	69997.9	56245	55978.5	59019.1	63156.1	67087.2	62996.1	68848.5	71870.3
DVVICPDTSLEEAK	P55053	Parkinson disease protein 7 homolog	99175.6	159614	129574	128821	117609	138886	120576	156242	100518	97264	152990	188294	150176	139456	165244	161579
TQGPYDVVVLPGGNLGAQNLSESALVK	P55161	Parkinson disease protein 7 homolog	10872.4	29451.4	31204.2	37225.5	45136.1	44499.9	19660.1	20173.6	18749	22695	18249.2	34945.1	20867.9	18184.5	27630	25880.4
GAEEMETVIPVDIMR	P56374	Parkinson disease protein 7 homolog	1657.14	34130.4	16322.6	16661.4	24849.3	26915.3	28321.7	20873.7	12598.3	10646.5	5117.71	28751.6	18205.8	30671.5	11258.3	23764.8
YSCFLGEELR	P56558	Embigin	3132.2	1564.65	2413.52	N/A	1524.2	2189.93	2074.55	3511.13	N/A	2053.91	3085.46	2423.84	N/A	1715.42	2926.09	2651.12
FTVFNSK	P56571	Embigin	1789.81	3055.09	3040.25	2227.67	N/A	2676.22	N/A	2898.1	2228	3443.19	3344	2065.18	2531.41	N/A	2745.26	N/A
LNMPLPPISR	P56574	Putative Dol-P-Glc:Glc(2)Man(9)GlcNAc(2)-PP-Dol alpha-1,2-glucosyltransferase	N/A	14346.2	17762.7	56546	19175.5	17642.4	23501.3	11175	11323.3	16515	11058.5	19094.1	17678.7	15079.6	18246.4	15671.9
NEELGQLYR	P56603	Pyridoxine-5'-phosphate oxidase	10318.6	5310.19	3618.62	3985.37	2798.63	4226.61	3203.29	4044.64	3543.81	3551.52	5077.75	3445.9	4353.62	3912.59	6020.57	N/A
VFLLAGR	P56932	Tubby protein homolog	11331.8	11600.8	9798.8	11507.3	13894.6	13822.6	9026.29	12109.7	19203.4	9594.53	11550.3	12237.6	20312	15749.2	13410.5	12191.6
AFYDAIK	P58405	Gamma-aminobutyric acid type B receptor subunit 2	N/A	14029.4	25878.1	69696.5	16039.3	5111.93	30876.1	11085.9	29907.6	20014.8	21509.8	14977.6	13103.3	43622	28070.5	19788.4
DQASEQLVGGQLTR	P59215	Mannosyl-oligosaccharide glucosidase	3783.3	2348.73	1807.44	1851.89	1789.93	1044.04	2000.09	1833.99	1183.8	1496.43	1623.29	1854.56	896.903	910.478	1278.18	2119.6
LGPLLDVLADSR	P60123	Mannosyl-oligosaccharide glucosidase	2176.09	2351.21	2121.79	2221.7	3199.76	N/A	2374.99	2271.03	2856.81	2323.13	1742.1	3354.99	2872.39	2530.85	2279.53	1852.17
VPPEFLVQR	P60825	Mannosyl-oligosaccharide glucosidase	4514.29	N/A	6396.35	5766.88	7365.55	6345.46	6259.36	6993.67	6230.84	6734.55	7486.98	N/A	6044.33	5967.79	6725.23	6772.03
APEDLAFLR	P60868	Mannosyl-oligosaccharide glucosidase	1572.95	1340.45	1901.19	1430.98	980.671	N/A	1304.9	1299.05	1414.64	1620.34	690.866	447.658	N/A	892.461	564.822	711.697
ILNLSGNELK	P60881	Nuclear RNA export factor 1	660.531	3920.88	3317.5	3475.61	3639.55	3122.13	2724.69	3430.89	3361.88	3663.17	2972.77	N/A	3623.36	2815.31	4129.35	N/A
ITIPYGK	P60901	Nuclear RNA export factor 1	3778.22	1979.15	3704.44	2275.5	3105.9	2918.37	N/A	2314.7	3019.03	2636.68	3032.74	2313.6	2617.87	2348.83	N/A	N/A
LNVVAFLNELPK	P60905	Nuclear RNA export factor 1	683.442	1481.57	957.816	959.145	3053.35	N/A	691.377	631.892	1291.35	1590.97	N/A	1241.71	1873.65	1564.69	N/A	991.548
SDPDLVAQNIDVVLNR	P61107	Nuclear RNA export factor 1	1710.96	874.307	1074.3	1501.17	807.757	1759.03	1409.88	2271.94	1151.37	1156.32	1325.51	1878.29	N/A	1404.8	1844.1	1158.93
ENFSCLTR	P61203	Malate dehydrogenase, cytoplasmic	179533	227676	193238	151818	172630	178579	182031	199215	172489	143472	188930	214478	184914	199239	222761	235916
EVGVYEALK	P61212	Malate dehydrogenase, cytoplasmic	86337.5	95656.7	84156	97371.8	82885.9	108959	91736.6	92703.4	86567.5	89155.3	74707.6	100298	83805.2	83544.8	100401	107471
ETAFEFLSSA	P61227	Malate dehydrogenase, cytoplasmic	7456.74	11161.9	35216.2	45199.8	53679.7	69730.6	17273.5	18689.8	25036.3	20396.9	17019.4	40278.9	27607.8	20548	27869.3	23522.8
VIVVGNPANTNCLTASK	P61265	Malate dehydrogenase, cytoplasmic	131045	190200	145841	130503	159432	133720	129136	139308	119700	118828	152071	138453	138583	150661	171923	172493
GEFITTVQQR	P61354	Malate dehydrogenase, cytoplasmic	779356	895784	330677	311459	329531	671729	656170	803143	276989	314295	720075	389573	721779	733682	797890	806596
DLDVAVLVGSMPR	P61589	Malate dehydrogenase, cytoplasmic	12161.7	33128.5	51307.8	43460.6	35152.8	49606.1	35998.8	41123.2	27371.1	38116.9	17554.2	34941.4	21956.3	26556.5	27782.3	30408.9
FVEGLPINDFSR	P61621	Malate dehydrogenase, cytoplasmic	239821	401706	425467	387492	499606	567941	370225	387737	352111	278621	356109	598609	461786	413224	528449	492928
LGLPGQPR	P61751	Mitochondrial amidoxime reducing component 2	5042.82	4728.29	4823.91	3593.57	N/A	3748.49	4622.82	N/A	4715.31	4581.06	4096.97	N/A	4436.71	4179.84	4635.4	5731.98
LLSPQQPALQR	P61765	Myocyte-specific enhancer factor 2D	1872.7	1424.03	3181.27	3743.48	3123.07	2972.87	3653.82	1824.76	743.957	3562.04	1806.26	N/A	1454.65	2829.71	3995.42	2044.2
TNADIIETLR	P61805	Myocyte-specific enhancer factor 2D	2674.28	1772.9	2766.62	2473.84	2883.43	2817.25	2569.54	2900.02	1576.06	2757	1878.24	1033.12	2583.11	3112.28	4154.85	N/A
ASEELDGLFR	P61972	Myocyte-specific enhancer factor 2D	1637.54	613.163	1722.1	1824.65	1815.77	1772.06	1363.97	639.472	854.431	2064.72	1021.02	1144.97	2540.36	1603.89	2075.83	897.745
AIFLADGK	P61980	Coronin-1B	9176.46	8903.06	11149.9	10645.7	11173	11077.4	10030.1	10722.9	10709.5	10199.2	10030	10400	10772.2	9871.54	10375.6	12269.7
IEQIEAGTPGR	P61983	Thioredoxin reductase 1, cytoplasmic	6046.06	5859.33	5848.19	5859.54	5809.49	6381.26	6087.17	6818.8	5129.13	4719.35	5996.73	8443.76	7068.35	5168.2	7367.11	6959.76
IPVTDEEQTNVPYIYAIGDILEGK	P62083	Thioredoxin reductase 1, cytoplasmic	258.391	2245.38	2564.75	2556.95	2481.44	1728.32	1648.81	739.498	1656.59	N/A	1420.84	3188.11	1689.09	1462.54	2330.46	3088.59
YLGIPGDK	P62193	Thioredoxin reductase 1, cytoplasmic	24018.8	33362.3	27251.7	31452	N/A	30387.4	31277.7	30166.8	27393.8	28613.2	26975.9	30459.5	28752.2	N/A	34003.5	29377.7
LELTPVAIQAGR	P62198	Thioredoxin reductase 1, cytoplasmic	6459.43	8852.06	7935.16	8767.42	9195.19	10956.5	7638.22	8715.06	8505.97	7052.9	7680.96	9432.58	8220.45	8166.61	9371.07	9740.7
VMVLDFVTPTPLGTR	P62243	Thioredoxin reductase 1, cytoplasmic	593.241	4900.02	3095.96	5567.87	9197.11	3456.57	1821.96	2819.54	4050.63	3861.59	1350.41	1911.3	3729.11	4160.78	N/A	2500.87
FAVFGLGNK	P62246	NADPH--cytochrome P450 reductase	4269.22	9654.29	6603.98	7398.18	9573.78	7837.95	7306.48	8070.52	8307.75	8866.64	7209.45	8747.84	10443.7	10296.4	6678.15	8211.54
GMSADPEEYDLADLSSLPEIDK	P62250	NADPH--cytochrome P450 reductase	940.773	1058.31	3749.95	6529.92	5663.75	6740.68	3410.5	3353.32	2636.28	2925.17	1984.43	5443	2970.18	3219.11	2674.78	3088.36
DGALTQLNVAFSR	P62260	NADPH--cytochrome P450 reductase	2112.67	904.199	1209.94	1565.86	2092.35	N/A	1724.93	1373.42	1390.17	2194.03	1473.54	N/A	1464.89	1584.87	N/A	824.12
NPFLAAVTANR	P62268	NADPH--cytochrome P450 reductase	14085.1	17917.3	15238.5	14386.8	17791.2	15574.8	14849.3	20115.6	15687.7	14686.1	15231.9	17558.3	18061.2	16999.3	17040.7	16724.8
EVGETLLYYGCR	P62271	NADPH--cytochrome P450 reductase	4455.15	3729.86	3233.81	3218.7	3629.1	2406.87	5473.98	4420.16	2432.61	3577.61	4391.91	3568.85	2560.65	3547.89	3912.18	4342.26
VVLPMELPIR	P62278	Cytochrome c oxidase subunit 2	1908.82	2818.35	8009.4	11814.4	10650.2	5741.97	3778.69	2326.43	8446.82	6112.05	2144.75	N/A	3153.68	6649.88	1385.73	5361.86
VGAFTVVCK	P62282	Aspartate aminotransferase, mitochondrial	304538	369433	305821	321410	401234	376697	359608	358959	340247	333157	329380	349114	368461	381920	389549	422235
VGASFLQR	P62425	Aspartate aminotransferase, mitochondrial	246224	335436	309454	291527	344880	337231	332345	348306	321658	329927	279161	325661	336141	338036	328766	351305
EYLPIGGLADFCK	P62630	Aspartate aminotransferase, mitochondrial	36018.2	52804.4	54729.8	71361	67083.5	112755	57942.3	60364.5	50717.2	63020.9	54859.1	87264.5	83792.4	68648.6	78243.6	70814
QWLQEVK	P62632	Aspartate aminotransferase, mitochondrial	23087.7	10943.4	4818.62	1042.47	1253.95	5515.34	12547.5	8360.35	7710.34	4391	11787.8	8528.13	5079.05	7496.94	8792.95	11330.2
FVTVQTISGTGALR	P62697	Aspartate aminotransferase, mitochondrial	33596.5	65751.1	37198.9	49626.4	53904.9	50449.1	48829.7	49821.9	46105.4	47845	39748.5	42446.8	59285.7	54911.9	47471.5	50178
DDNGKPYVLPSVR	P62703	Aspartate aminotransferase, mitochondrial	28026.1	22181	28040.8	20464	28307.4	23415.9	42096	26894.5	24479.1	24923	23442.2	28866.1	27138.1	27069.5	24146.5	25450.6
TCGFDFSGALEDISK	P62718	Aspartate aminotransferase, mitochondrial	36212	131865	69841.8	71026.9	70114.8	105035	69794.4	68617.5	53949.8	56086.7	64353.3	96249.9	76551.8	64390.5	82974.9	76704.7
MNLGVGAYR	P62744	Aspartate aminotransferase, mitochondrial	18714.9	23547.8	38738.7	31610.2	40933.3	22513.7	22235.5	15641.4	20573.6	21908.8	14389.2	17238.8	16289.3	21611.1	17174.8	20183.9
IAATILTSPDLR	P62752	Aspartate aminotransferase, mitochondrial	144814	490873	172253	215749	200004	251521	408360	455723	193143	187139	333469	238796	442419	216079	497636	257241
KQWLQEVK	P62755	Aspartate aminotransferase, mitochondrial	4341.89	1367.28	524.808	212.828	171.061	507.995	1522.14	964.849	1290.98	572.364	1543.25	1430.01	825.649	1108.74	1050.93	1831.14
ASAELALGENSEVLK	P62804	Aspartate aminotransferase, mitochondrial	234939	177932	87030.5	90149.3	86987.6	225587	241885	119887	78118.4	80002.2	183793	216846	191319	182877	237145	224041
NLDKEYLPIGGLADFCK	P62815	Aspartate aminotransferase, mitochondrial	14943.5	20055.5	22708.4	13662.3	43181.6	32233.1	42810.2	23878.5	31054.9	16078	24358.2	61846.3	26816.4	22998.7	28581.2	23896.8
EFSVYMTK	P62824	Aspartate aminotransferase, mitochondrial	9549.92	39463.8	35570.2	35255.5	55427.3	30273	34083.7	31581.7	37204	35494.6	21599.9	30312.2	32300	36795.9	23849.6	29265.6
LGEHNINVLEGDEQFINAAK	P62832	Anionic trypsin-1	438483	1.04817e+06	597071	959333	844119	1.38413e+06	1.64861e+06	1.16961e+06	684115	424846	629072	1586608	1.53544e+06	1.03306e+06	2.10234e+06	1.57065e+06
GENHCGIESEIVAGIPR	P62850	Cathepsin B	8960	9500.33	9406.96	8686.18	7489.25	6866.78	9228.74	11600.9	5963.74	8825.48	11879.2	11035.6	10227.9	8094.59	8599.8	8537.05
VLIEDGSGEAVLSR	P62853	Complement C3	3024.63	4789.49	11575.5	5419.19	4015.63	4058.06	3259.4	3737.16	3126.35	3040.63	6182.28	3685.55	3538.78	5236.06	5971.19	3250.71
AVLFNYR	P62856	Complement C3	4168.71	4367.16	14726	7128.22	7245.98	4455.18	4991.56	5695.89	5279.39	5611.55	8084.75	4654.56	6309.37	9709.98	7044.61	3470.39
RVPVVTQGSDAQALTQDDGVAK	P62859	Complement C3	2868.81	2983.47	6242.23	2737.74	2410.1	1371.3	1195.84	1054.29	1762.83	1700.93	3851.67	499.914	845.903	3142.52	3390.69	807.605
SSVAVPYVIVPLK	P62864	Complement C3	2343.02	4880.05	11208.1	7287.53	8519.13	5769.42	3206.26	4091.36	4851.17	3416.77	6304.25	N/A	6916	8959.13	6501.43	4015.15
IGLQEVEVK	P62870	Complement C3	3623.3	2781.63	10068.9	5089.63	3929.11	N/A	2130.03	2805.62	3114.82	2927.1	5714.93	N/A	3445.05	5215.67	4503.28	2624.63
ACEPGVDYVYK	P62882	Complement C3	4502.14	N/A	8607.08	3775.74	3172.45	2780.13	3886.98	3644.48	3243.51	2809.77	5908.51	N/A	3965.17	5062.63	5045.39	3007.38
EYVLPSFEVLVEPTEK	P62890	Complement C3	1752.4	3176.72	8572.37	4810.48	3917.28	5004.35	2473.63	1987.12	2004.86	2511.85	3773.93	N/A	N/A	3455.49	5174.92	3384.5
LITQGESCLK	P62898	Complement C3	N/A	3378.67	9323.56	3838.69	N/A	3922.97	2664.47	3524.64	2838.39	2301.99	6154.1	N/A	4217.96	4911.66	3511.48	2940.3
GLEVSITAR	P62902	Complement C3	2501.26	3292.1	5092.97	4633.05	2684.49	N/A	1711.56	2597.01	2834.08	2993.48	2731.62	N/A	4301.24	5054.7	3117.6	N/A
IFTVDNNLLPVGK	P62907	Complement C3	1165.46	2160.72	8394.12	4300.88	4135.32	N/A	2728.35	3051.1	2555.39	2482.37	4399.15	N/A	N/A	4713.99	3496.23	3506.46
GYTQQLAFK	P62909	Complement C3	1565.93	1627.81	5331.39	1972.31	1273.63	N/A	1432.65	1159.5	1138.4	1337.26	2902.32	N/A	N/A	2308.94	2660.32	1267.84
SDVDEDIIPEEDIISR	P62914	Complement C3	8257.88	6230.66	15209.6	8526.99	7782.6	9750.08	6141.24	8717.32	3590.5	5044.21	11975.3	12506.5	12266.9	14255.7	17636.9	8958.17
RQEALELIK	P62919	Complement C3	2180.53	770.871	2755.08	1359.62	1177.93	658.103	959.822	666.197	1029.97	967.744	1309.77	815.924	N/A	1242.53	1288.23	894.754
QVVAGTNFFIK	P62944	Cystatin-B	3007.89	5025.81	3320.8	2900.37	2822.56	3192.67	1917.57	1548.16	3413.28	3398.51	2131.99	1202.05	2579.39	2340.42	1630.75	1402.03
VNLFSDR	P62959	Thy-1 membrane glycoprotein	29518.8	34879.1	41773.8	61231.4	39060.8	92290.8	47848.7	43469.7	52118.8	35541.9	49237.8	51399.7	45019	52416.2	64203.8	93853.3
VDPVNFK	P62961	Hemoglobin subunit alpha-1/2	140401	247174	212207	170558	205566	187819	188043	129852	73577.6	223766	123040	229300	110740	106567	174523	386791
MFAAFPTTK	P62963	Hemoglobin subunit alpha-1/2	40755.1	133671	281938	230758	343834	161515	113126	131605	103618	143285	46273.2	167392	101773	69941.6	64219.4	154030
IGGHGGEYGEEALQR	P62966	Hemoglobin subunit alpha-1/2	47749.8	79361.7	69404.1	57898	71306	62713	62821.2	55775	21690.1	65239.3	40643.9	83100.2	32775.2	45895.3	63487.4	143165
TYFSHIDVSPGSAQVK	P62997	Hemoglobin subunit alpha-1/2	66046.7	126691	93344.7	84338	108510	73828.4	80913.8	59892.9	31307.7	112704	54060.8	77971	47177.5	65725.1	69815.1	181207
FLASVSTVLTSK	P63004	Hemoglobin subunit alpha-1/2	37003	127021	48504.2	68998.4	68031.7	63654.6	46623.9	40115.2	33573.3	92809.8	24040.5	30315.4	51871.6	45642.9	32506.2	79550.5
LRVDPVNFK	P63012	Hemoglobin subunit alpha-1/2	14891.3	25994.9	18680.1	12455.1	23821.8	10549.9	14829.5	12637.4	7056.26	20769.4	11455.8	13749.7	10609.2	13414.1	10326.7	29896.4
VNPDDVGGEALGR	P63018	Hemoglobin subunit beta-1	229815	407838	192536	150374	181207	164664	154835	239431	70483.2	170952	97661.4	191066	183517	110613	142227	314975
YFDSFGDLSSASAIMGNPK	P63036	Hemoglobin subunit beta-1	4006.99	24104.7	20349.5	17292.2	36934.1	21908.7	12837.7	8479.79	8614.4	17436.3	5614.27	17523	7061.23	10358.3	8006.98	28573.1
LVVFEQENFQGR	P63039	Beta-crystallin B1	47529.8	105104	144499	N/A	30899.3	103828	774536	55717.6	36312.6	51609.6	18555.3	48886.2	4872.82	3545.65	6902.34	277666
ICLFEGANFK	P63045	Beta-crystallin B1	28635.2	70399.4	103727	N/A	21108.4	98149.7	425370	42370.2	29870.8	34286	16841.7	39322.6	2701.4	4536.61	6403.8	207002
GYQYLLEPGDFR	P63086	Beta-crystallin B1	36228.6	177381	127934	N/A	48469.7	171144	611896	102780	30134.2	36370.2	33209.3	104523	11722.7	9472.76	16154.6	281939
RVEFSGECLNLGDR	P63088	Beta-crystallin B1	40835.6	54713.3	44037.1	N/A	25070.2	65828.1	177881	38578.5	28210.1	38548.3	13540.3	29543	3690.65	4183.13	4390.33	86476.3
GEMFVLEK	P63102	Beta-crystallin B1	11847.3	57584.4	98332.5	N/A	36151.6	75787	161905	25084.4	30194.6	40651	7439.69	22850.9	N/A	2985.01	N/A	51517
CELSAECPNLTESLLQK	P63155	Beta-crystallin B3	9035.47	41818.2	65900.6	N/A	26683.8	122760	140790	13409.3	11707.8	19008.1	6837.11	24505.9	3010.88	1594.7	3693.54	121272
LHLFENPAFSGR	P63159	Beta-crystallin B3	17579	81452.6	67302	N/A	24672.2	19252.9	229594	35202.4	21822.9	35783.3	14332.9	40753	7737.13	11918.4	8816.02	141600
VTVYELENFQGK	P63245	Beta-crystallin B3	29362.1	67812.1	39718.3	N/A	19004.8	83155.1	191860	37596.3	21894.7	28185.9	14450.8	31880.3	1718.22	2395.3	3926.51	178122
VGSIQVESGPWLAFER	P63322	Beta-crystallin B3	21299	30879.7	5613.26	N/A	N/A	21879.3	50297.9	12087.9	3398.47	3497.69	5063.22	9623.35	N/A	N/A	771.668	23955.1
TANLGAGAAQPLR	P63324	Apolipoprotein E	5839.59	7591.29	7739.76	3999.66	7086.2	5908.75	3944.12	8641.53	3606.87	4297.98	7459.45	7207.83	6338.56	8758.82	3743.25	7569.27
LQAEIFQAR	P63326	Apolipoprotein E	7105.47	9126.61	10873.4	4904.15	11110.8	7791.42	4614.75	10266.2	5482.27	6532.73	8871.14	9766.85	7123.95	10057.5	3939.33	7486.93
ALDVNVALR	P63329	Retinol-binding protein 1	4976.28	4911.77	3746.1	4229.62	3654.14	3257.56	2620.13	5063.62	2841.95	4555.79	3700.78	2790.58	4731.93	3735.12	2984.58	3764.46
EFEEDLTGIDDR	P67779	Retinol-binding protein 1	3056.37	2269.4	2527.66	2421.48	2199.06	2971.76	1816.94	2570.93	564.229	2062.31	5127.83	3349.63	N/A	2513.05	4198.54	2089.69
IANLLKPDK	P67874	Retinol-binding protein 1	521.594	1157.53	1073.57	1294.43	600.877	470.11	N/A	737.281	N/A	1191.02	1111.24	N/A	877.414	840.98	1109.14	944.821
APQVSTPTLVEAAR	P68101	Albumin	277550	342149	1.02163e+06	470219	352531	323313	284869	366694	245297	224486	376970	348429	353598	305037	272748	280226
LVQEVTDFAK	P68182	Albumin	179919	253579	572046	295830	232567	190910	172235	223436	155218	157970	217523	205383	210498	200190	154311	189298
LGEYGFQNAVLVR	P68255	Albumin	139765	180333	466762	193320	196020	176270	143237	184173	130307	111715	177355	168737	180034	148089	127022	149084
QTALAELVK	P68511	Albumin	92323.6	117948	328107	142258	123005	102581	89564.5	116304	93470.6	87707.8	120530	108237	114717	100681	75582.2	92400.2
LPCVEDYLSAILNR	P69060	Albumin	8304	83700.9	86325.3	30661.3	31953.1	29311.3	19243.4	27430.5	28280.5	32724	28508.3	37171	73384.5	43799.2	24956.1	44948.4
SIHTLFGDK	P69682	Albumin	43840.4	87055.8	220645	95549.7	81553.6	56049.8	61748.3	84906.6	61026.2	57035.8	83220.2	68533.8	74483.8	85197.9	56814	66679.5
DNYGELADCCAK	P69897	Albumin	97290.6	77565.1	111500	79415	63811.4	52240.6	45512.8	60022.1	46691.2	36735	60317.6	49895.8	56753.9	58326	44058.1	52119.4
KQTALAELVK	P70483	Albumin	12095.8	21882.9	46815.2	22114.9	20067	16402.7	15658.1	20389.7	15142.8	13614.4	19794.4	18229.3	18261	18829.6	13430.4	17853
LQACCDKPVLQK	P70500	Albumin	11427.7	12396.9	47459.2	18026.3	13293.1	10481.2	9379.34	11902.9	7984.06	9156.54	15462.5	12793.4	13377.9	13327.9	9591.71	11236.2
CCAEGDPPACYGTVLAEFQPLVEEPK	P70501	Albumin	4979.48	5980.73	30879.5	12806.1	13529.6	12535.4	5743.57	6161.08	5284.32	5961.97	10164	10824.7	10143.4	7609.34	8200.5	8276.94
DNCFATEGPNLVAR	P70549	Albumin	7983.31	5609.46	16749.1	9374.12	6282.42	9057.92	5719.18	7918.34	3712.48	6515	7439.55	7383.82	6889.7	5155.4	5823.29	6077.71
YNEVLTQCCTESDK	P70566	Albumin	140398	148154	164498	69081.1	56638.9	44927.5	50799.9	56231.8	38419.7	37215.8	65800.8	55291.7	54744.4	100754	41239	47419.8
ECCHGDLLECADDR	P70580	Albumin	42824.5	32174.4	84282.2	44613.4	34944.2	27433.4	23079.5	23464.2	43306.5	20700.7	32446.8	25908	45904	24375.2	29739.3	27744.1
AADKDNCFATEGPNLVAR	P70615	Albumin	65728.9	58669.5	170283	70627.4	66587.3	98231.3	96564.5	63060	85351.2	42879.8	65195.6	54993.4	48138.8	101180	84399	101519
AETFTFHSDICTLPDKEK	P70619	Albumin	24095	27784.9	56346.4	19452.9	27234	9068.92	19596.4	22227	13909.6	15347.6	23949	15660.5	17931.1	20807.9	12207.5	16639.4
GLVLIAFSQYLQK	P70628	Albumin	2670.47	10528.3	8280.14	5228.64	15540.9	2374.86	2919.82	4498.3	7851.61	5656.55	4145.09	3238.9	15256.4	8074.51	1947.76	4686
AETFTFHSDICTLPDK	P70645	Albumin	10807	22416.5	24422.9	14190.4	14031.9	15711.4	16737.7	12293.1	12560.6	14950.5	21481.9	17389.3	17577.2	18619.5	15359.3	18014.4
DVFLGTFLYEYSR	P80432	Albumin	18586.1	87118.5	53419.6	15945.5	41147.9	16617.5	14599.9	29683.1	23700.3	22747.5	42899.8	51152.8	81522.3	60470.1	27397.3	28972.2
LRDNYGELADCCAK	P81155	Albumin	6504.84	3611.48	7943.49	7018.52	8621.77	3326.06	3575.38	6139.11	3611.94	3832.96	2856.2	3549.51	4619.9	5282.58	3576.72	6578.48
TVMGDFAQFVDK	P81795	Albumin	7715.14	18379.9	53678	61925	59073.4	31388.7	22444.5	16761.5	25055.4	12212.7	15011.1	31635.8	16102.1	18926.7	9409.93	13807.9
FPNAEFAEITK	P82471	Albumin	140653	220151	628954	301960	240492	215234	180463	248988	151002	149435	230723	249115	239076	202163	162533	175839
HPDYSVSLLLR	P82995	Albumin	5194.12	4068.39	10707.9	6176.29	10360.3	2528.18	4680.95	6153.79	6746.7	6596.65	4725.55	N/A	8546.51	9031.6	N/A	4577.4
RPCFSALTVDETYVPK	P83732	Albumin	23819.6	36498.2	45355.8	39184.3	42718.8	15151	30479.6	42886.5	22069.5	24826.3	44113.8	27136.6	33744.2	35482	23564.1	32651.3
YSLFGALR	P83868	NADH-ubiquinone oxidoreductase chain 1	4323.03	8969	6746.83	10927.8	12495.2	10290.2	9303.78	13765	15688.1	13247.5	8291.68	9962.19	16359.4	15212.6	8439.6	11828.3
ILGYMQLR	P84039	NADH-ubiquinone oxidoreductase chain 1	1782.02	N/A	2520.69	4079.7	6489.7	3588.78	2853.65	3141.34	6782.22	4285.5	2301.36	N/A	3028.26	3511.92	N/A	3578.87
GPNIVGPYGILQPFADAMK	P84060	NADH-ubiquinone oxidoreductase chain 1	283.167	1508.56	1120.78	2340.14	4428.78	3157.26	860.044	536.102	1290	2078.92	287.754	N/A	1310.18	1145.1	588.175	614.583
TIDIEPDIEALLSK	P84083	Glutathione peroxidase 1	643.534	1628.51	1519.35	1702.41	2459.01	2201.37	1297.69	909.953	983.693	1539.03	1083.93	2935.92	N/A	1460.54	2023.7	1390.19
EDSIPQLEDVSR	P84092	Tyrosine 3-monooxygenase	7778.44	3098.09	5839.59	5664.47	5831.53	8805.88	6053.05	7119.49	4852.49	5019.22	6785.3	7962.78	7468.83	6920.94	5012.62	6082.54
EAAAAAAAAAVASSEPGNPLEAVVFEER	P84817	Tyrosine 3-monooxygenase	1151.78	738.382	849.283	1594.98	N/A	2731.92	867.159	1198.6	1013.91	1440.7	1140.2	1876.62	N/A	1763.04	2189.6	1669.39
GLLNAIVIR	P84903	Ornithine aminotransferase, mitochondrial	2561.83	11506.9	5286.19	4280.98	10035.1	5144.37	4782.47	6203.33	6639.64	9745.4	3901.82	4891.41	7514.25	8273.5	2574.08	4883.35
LAPPLVIK	P85108	Ornithine aminotransferase, mitochondrial	6463.36	6292.98	9863.22	6342.01	9884.12	9703.4	10657.1	8351.7	5769.6	8885.51	8362.09	12563.1	8057.3	8218.36	8037.17	9895.42
AFYNNVLGEYEEYITK	P85515	Ornithine aminotransferase, mitochondrial	3678.77	4726.86	2291.54	1574.7	N/A	2762.99	3437.04	3859.38	1659.24	1938.11	2069.44	6700.24	3250.83	4178.97	2867.83	4889.58
LPSDVVTAVR	P85834	Ornithine aminotransferase, mitochondrial	29119.4	42906.4	34980	24521.1	37190.4	33305.1	43505.8	38890.6	26518.2	46535.5	38089.2	48438.8	32660.2	34880.3	31055.3	42954.8
KTEQGPPSSEYIFER	P85845	Ornithine aminotransferase, mitochondrial	11887.4	16016.9	11946.7	7527.44	12358.6	9127.84	16543.9	11163.3	7449.71	12670.8	10813.5	12451.8	7808.94	10048.5	6751.09	13168.5
GFAFVTFDDHDSVDK	P85968	Heterogeneous nuclear ribonucleoprotein A1	6196.07	7089.46	8858.27	4159.16	3737.4	8256.29	8197.61	8285.05	8821.18	3576.19	11426.3	8570.6	5096.4	7486.45	9472.64	10983.6
LFIGGLSFETTDESLR	P85969	Heterogeneous nuclear ribonucleoprotein A1	22104.1	24371.5	28788.5	12103.2	11546.7	15291.3	20336.8	35030.7	26622	11560.5	29779	30945.2	16602.5	23409.6	34687.5	39263.4
IEVIEIMTDR	P85970	Heterogeneous nuclear ribonucleoprotein A1	13144.5	19512.5	52971.7	47651.2	44159	52985.3	29980.7	22307.6	67997.6	30696.4	22579	50305.6	16140.5	46135.7	22252.4	54590.1
EGVIECSFVQSK	P85971	Malate dehydrogenase, mitochondrial	135255	127170	121872	101901	117257	106494	131064	142322	102174	115282	135335	142060	132304	133011	158561	146522
VNVPVIGGHAGK	P85972	Malate dehydrogenase, mitochondrial	40840.4	55725.7	47719.2	46050.1	55679.9	50941.5	49671.8	52288.3	48537.4	50092.2	52258.5	53670.5	56843.8	57672.1	50799.1	58776.9
GCDVVVIPAGVPR	P85973	Malate dehydrogenase, mitochondrial	168323	240689	216112	200976	213504	227875	254614	245330	181951	163977	216014	272037	239688	233006	279424	293405
VDFPQDQLATLTGR	P86172	Malate dehydrogenase, mitochondrial	29966.6	79362.9	42561.9	43349.2	47715.8	60025.3	41419.5	42974.3	39696.7	33576.7	36735.6	57181.4	46028.6	40992.6	55760.5	45720.1
VAVLGASGGIGQPLSLLLK	P86173	Malate dehydrogenase, mitochondrial	12343.4	211829	46819.4	136448	238461	163570	28461	28987.4	101692	115141	27937.7	96929.3	151871	143858	34521.4	40676
ETECTYFSTPLLLGK	P86252	Malate dehydrogenase, mitochondrial	69178.9	140028	57415.5	54215.5	157307	191014	104206	130069	46500.3	83118.4	54301.6	177546	154649	121410	141376	73935.4
LTLYDIAHTPGVAADLSHIETR	P97519	Malate dehydrogenase, mitochondrial	10919.3	23255.4	8093.86	3631.91	15369.1	N/A	13639.6	11799.5	10316.1	15457.8	10951.1	3581.3	8434.06	14187.5	7641.61	13138.2
AGAGSATLSMAYAGAR	P97526	Malate dehydrogenase, mitochondrial	18829.1	33391.4	15452.1	13882.8	24956.8	17754.9	20608.2	18893.8	13790	13587.3	14097.9	17381	19911.2	24440	15487.4	17391.4
GYLGPEQLPDCLK	P97536	Malate dehydrogenase, mitochondrial	144187	241030	226859	251315	250766	319905	253359	229906	204906	200614	229413	254369	239585	235073	274731	279630
IFGVTTLDIVR	P97544	Malate dehydrogenase, mitochondrial	98628.1	206424	133903	122670	217723	137419	114493	130054	156227	133451	111371	146111	188235	175447	141270	155024
ANTFVAELK	P97546	Malate dehydrogenase, mitochondrial	147921	151560	149775	132286	154375	154719	154390	141264	134095	139541	148204	150990	139725	142480	150114	161310
TIIPLISQCTPK	P97576	Malate dehydrogenase, mitochondrial	40719.1	61452.4	45913.4	41119.6	62387	46645.8	42295.4	51309.3	40560.8	31192.6	49853.9	52222.5	56393.7	54048.3	48698	62142.4
MIAEAIPELK	P97584	Malate dehydrogenase, mitochondrial	38597.3	66469.3	150822	122715	191989	98957	128019	99738.2	121440	110451	80388.2	105419	91376.9	131302	106210	93058.6
FVFSLVDAMNGK	P97603	Malate dehydrogenase, mitochondrial	N/A	3298.1	8829.6	9114.11	14180.7	1940.94	2975.02	2945.03	3646.72	4888.49	1035.25	3272.88	2193.99	4729.07	1696.77	3366.67
VTLTPDEEAR	P97685	L-lactate dehydrogenase A chain	1.66124e+06	2.36713e+06	2.03256e+06	1.85081e+06	2.02343e+06	2.02668e+06	2.12007e+06	2401701	2.16507e+06	1720776	2.02439e+06	2.71924e+06	2.11557e+06	2.31587e+06	2.65012e+06	2.59659e+06
DLADELALVDVIEDK	P97686	L-lactate dehydrogenase A chain	43789.4	968531	1.2094e+06	1.98448e+06	1.66511e+06	1.93184e+06	430321	230249	655654	1.15372e+06	507311	1.87505e+06	1.04672e+06	730404	1.0285e+06	1.24081e+06
DQLIVNLLK	P97689	L-lactate dehydrogenase A chain	275609	521968	632292	674781	821406	879471	476619	552440	653798	537021	541078	856379	796130	675791	869530	866456
FIIPNVVK	P97690	L-lactate dehydrogenase A chain	403676	459900	642287	732144	411616	835381	591667	713511	690643	281943	687960	807525	830018	411089	712205	471897
SLNPQLGTDADKEQWK	P97697	L-lactate dehydrogenase A chain	190346	51281.9	24214.8	10534.4	7645.25	20597.2	41072.4	27426.3	32075.9	21138.9	43052.6	29853.7	27889.4	25795.7	27904.3	39424.7
QVVDSAYEVIK	P97700	L-lactate dehydrogenase A chain	529299	929157	619121	678770	717278	814638	678850	847495	679735	616089	733066	992326	892191	825460	961772	881235
SADTLWGIQK	P97710	L-lactate dehydrogenase A chain	841023	314960	90106	39735	31448.2	137602	277114	208428	195860	70856.8	275166	242463	119581	185939	240010	288718
EDVFLSVPCILGQNGISDVVK	P97829	L-lactate dehydrogenase A chain	6327.84	33072.6	70758.3	109931	57237	116747	23858.5	29255.8	65033.7	30050.3	48665.7	122114	71057.9	69045.7	51340.2	38178.6
GEMMDLQHGSLFLK	P97834	L-lactate dehydrogenase A chain	7087.47	31564.6	24514.8	41050.7	77653.4	19641	19610.2	20444	42183.5	27793.9	8360.57	24658.9	21982.7	28390.2	10446.9	20770.1
ITVVGVGAVGMACAISILMK	P97849	L-lactate dehydrogenase A chain	468.041	5167.19	4413.88	9590.54	25838.4	7757.21	6283.6	3374.62	9381.1	7324.12	2702.22	1892.86	8742.39	3383.42	2848.01	4941.3
DNYVPEVSALDQEIIEVDPDTK	P97852	40S ribosomal protein S17	964.289	1359.37	3778.84	7451.38	N/A	14187.9	2295.87	2761.69	2829.08	2138.74	2566.09	3803.12	3567.15	2584.08	5036.37	2930.87
VCEEIAIIPSK	P98158	40S ribosomal protein S17	6495.73	8384.02	9023.19	8941.66	6988.3	7863.41	9572.33	10031.6	7546.95	5518.79	10282.4	9453.95	5881.6	8187.3	8636.18	12791.5
LLDFGSLSNLQVTQPTVGMNFK	Q00438	40S ribosomal protein S17	491.422	1941.3	2839.71	4541.58	4765.51	4592.1	1196.62	1100.83	2975.71	2541.06	793.247	1683.77	N/A	2058.61	1161.01	1376.18
DETEFYLGK	Q00566	60S ribosomal protein L35a	5639.59	3744.85	5180.09	4580.75	4662.7	4555.66	4306.17	3980.81	3879.57	3834.16	4973.06	3031.86	2037.2	3656.57	2370.24	5324.54
DAQLFIQR	Q00715	Catalase	11239.3	28896.8	30096.7	30972.6	33148.2	29528.6	31564.3	30043.9	29447.9	30827.5	29739.5	33509.3	29856.7	31892.2	34489.5	38352.7
EAETFPFNPFDLTK	Q00981	Catalase	1424.59	3882.87	6174.12	6977.06	15641.9	9445.8	2716.83	2602	4495.69	5186.01	3393.41	5831.28	7888.91	4529.52	5196.49	4576.1
FSTVAGESGSADTVR	Q01066	Catalase	3818.14	1756.68	1428.51	1538.28	1370.83	1996.36	1576.11	1311.96	1328.75	1550.05	1236.39	1331.08	1162.72	1466.58	1340.12	2175.71
APQKPDVLTTGGGNPIGDK	Q01205	Catalase	2708.62	1214.01	1721.71	2573.97	3705.5	2400.31	2769.1	2229.03	1956.22	2776.03	1987.9	2180.2	1369.19	1898.79	1479.17	2135.19
TIAPALVSK	Q01579	Alpha-enolase	1.76028e+06	2.39184e+06	1.98015e+06	1875116	2.14778e+06	2381733	2.19742e+06	2.41707e+06	2106745	1.8422e+06	1.84836e+06	2.40347e+06	2.38833e+06	2.3797e+06	2655952	2547305
EALELLK	Q01728	Alpha-enolase	885661	1.159e+06	799053	748012	934164	1.11026e+06	861980	1.09852e+06	914151	851543	880484	1.26713e+06	1132685	963136	1.17414e+06	1.20467e+06
IGAEVYHNLK	Q01986	Alpha-enolase	436648	558196	463048	466285	515166	604699	527331	579676	503138	440908	472984	603205	621408	626872	668744	639854
SCNCLLLK	Q02253	Alpha-enolase	781720	790464	716922	626946	685748	680111	705959	760951	585811	640391	778338	704317	760812	826394	887895	883602
DATNVGDEGGFAPNILENK	Q02356	Alpha-enolase	104566	258694	215374	140513	337857	282263	193773	252106	185899	142640	229809	371470	283220	269426	254332	263360
GNPTVEVDLYTAK	Q02563	Alpha-enolase	1.6702e+06	1.49349e+06	1.40106e+06	1.31267e+06	1.24237e+06	1.55708e+06	1.57628e+06	1867883	1.44187e+06	1.2635e+06	1.53134e+06	1.76147e+06	1.59052e+06	1.53006e+06	1.96974e+06	1.78605e+06
AGYTDQVVIGMDVAASEFYR	Q02589	Alpha-enolase	42318.9	25816.3	29910.8	45808.5	25555.4	42693.4	45664.1	52046.8	48210.9	26931	29096.4	38506.3	29572.6	33312.3	36168.6	34239.6
LAMQEFMILPVGASSFR	Q02874	Alpha-enolase	27762.5	199062	308251	550047	779440	416675	184056	196599	338061	279744	126735	288228	325484	322903	168418	275529
AGKYDLDFK	Q03114	Alpha-enolase	2535.91	2872.21	1994.03	2247.18	2448.51	1855.4	2203.49	2297.74	2709.9	2379.07	2741.31	1849.57	2043.14	3056.87	2669.05	3622.94
FTATAGIQVVGDDLTVTNPK	Q03346	Alpha-enolase	295453	443263	284551	345379	141962	360815	388913	540174	301781	257620	250637	300215	283670	324255	329591	401147
YITPDQLADLYK	Q03348	Alpha-enolase	1.62961e+06	3862426	1.89237e+06	1.72299e+06	4.39954e+06	6.83837e+06	3226791	3.80726e+06	1.66863e+06	2.94165e+06	3.24461e+06	5967492	4946195	4083188	4.92609e+06	4922430
IDQLMIEMDGTENK	Q03555	Alpha-enolase	80927.1	181965	228466	253751	410849	165085	145307	150807	174509	206289	97383.9	149715	120201	186109	123857	121588
HIADLAGNPEVILPVPAFNVINGGSHAGNK	Q04462	Alpha-enolase	3297.27	11301.4	7904.76	4472.45	13300.9	N/A	6557.39	9511.8	5245.51	10359.3	8657.26	N/A	12338.1	13248.6	3477.13	6578.46
FFPASADR	Q05095	Protein disulfide-isomerase	16214.4	17679.4	19913.8	21557	19824.6	21911.4	24016.1	33043.5	15412.3	25664.3	30221.1	37366.9	28475.8	16534	25149.4	20982.8
NFEEVAFDEK	Q05096	Protein disulfide-isomerase	7912.97	8341.95	7430.31	7425.66	7911.09	8142.43	9835.78	14497.9	6015.57	10018.8	13224.6	11128.2	10346.8	7298.49	11509	9136.24
DGVVLFK	Q05140	Protein disulfide-isomerase	3627.36	2912.46	3140.76	3403.79	2828.81	4948.23	3640.3	5024.63	2495.51	4530.14	5035.93	6549.8	4116.63	3245.91	4248.56	4075.94
YKPESDELTAEK	Q05175	Protein disulfide-isomerase	1719.21	2777.97	1954.94	1872.53	1559.53	2267.46	1832.74	3210.04	1593.82	1816.09	2435.75	3828.18	2444.41	1868.36	2102.97	N/A
VDATEESDLAQQYGVR	Q05546	Protein disulfide-isomerase	6088.74	7996.9	2880.9	4378.28	2272.32	7238.86	6522.91	10340.1	1894.95	3259.66	4803.99	10655.2	8722.26	5032.35	7745.92	5434.27
LITLEEEMTK	Q05683	Protein disulfide-isomerase	5116.46	10488.3	10073.9	10605.3	11991.8	8199.05	8015.13	11608.7	6716.17	11936.4	8545.25	11042.6	8550.76	7213.34	2755.73	6310.59
HNQLPLVIEFTEQTAPK	Q05764	Protein disulfide-isomerase	5265.6	4791.82	4660.42	1961.73	3946.45	N/A	6503.84	8146.85	2352.78	6149.88	7587.89	5382.67	6022.49	2328.18	5286.85	3253.68
GAAQNIIPASTGAAK	Q05962	Glyceraldehyde-3-phosphate dehydrogenase	6231233	7.1233e+06	6.10795e+06	5.60943e+06	5.34043e+06	6510816	6.35625e+06	6.99792e+06	6221111	5.30227e+06	6.14682e+06	7629238	6736282	7225378	9004663	7424562
LISWYDNEYGYSNR	Q05982	Glyceraldehyde-3-phosphate dehydrogenase	482014	419773	79242.3	32617	25939.9	121986	264576	258622	134340	77228.7	270413	225028	169451	181673	269239	288765
LVINGKPITIFQER	Q06647	Glyceraldehyde-3-phosphate dehydrogenase	5703.28	45097.3	24263.6	30096.7	39664.2	20677.2	15497.6	21611.5	27566.9	26732.9	22184.9	16173.4	32480.9	40094.1	16605.3	31921.2
IVSNASCTTNCLAPLAK	Q07009	Glyceraldehyde-3-phosphate dehydrogenase	356460	493099	306301	211672	329860	162087	300559	356247	213610	212532	444584	336660	289680	341316	412407	435102
VIISAPSADAPMFVMGVNHEK	Q07116	Glyceraldehyde-3-phosphate dehydrogenase	19811.7	235071	223156	331166	658918	203698	156114	97554	318644	265833	66379.6	144092	119014	278295	65987.9	130801
VIHDNFGIVEGLMTTVHAITATQK	Q07205	Glyceraldehyde-3-phosphate dehydrogenase	7232.28	94772.1	36464.1	18353.9	101435	23281.1	38627.8	34251.8	44575.3	89525.8	18636.5	18300.1	29407.1	54906.6	20635.6	23938.6
WGDAGAEYVVESTGVFTTMEK	Q07266	Glyceraldehyde-3-phosphate dehydrogenase	4730.45	55501.4	4349.66	3001.05	6816.69	38747.5	6225.11	24593.2	49538.7	8604.58	5257.89	10260.4	26327.9	28426.7	6221.38	6189.15
GILGYTEDQVVSCDFNSNSHSSTFDAGAGIALNDNFVK	Q07310	Glyceraldehyde-3-phosphate dehydrogenase	24272.1	12588.2	11068.9	4329.23	12308.1	11670	22497.5	61925.3	26428.9	9716.73	34471.7	26443.5	36833.4	35343.7	37467.8	27926.8
VVDLMAYMASK	Q07647	Glyceraldehyde-3-phosphate dehydrogenase	52789.3	76919.9	266652	291163	495599	230119	205790	211114	262782	76489	54820.3	253342	225585	97892.7	114893	214256
VVDLMAYMASKE	Q07803	Glyceraldehyde-3-phosphate dehydrogenase	12248.9	14132.8	16365.5	20409	12887.2	12877	13626.3	7526.26	15629.6	13670.7	10610.3	5824.63	11437.2	23528.6	N/A	10596
IAQSDYIPTQQDVLR	Q07936	Guanine nucleotide-binding protein G(i) subunit alpha-2	19588.3	25787.3	17719	19230	16838.7	22648.2	22246.5	21550.5	7595.58	17745.2	19895.7	28073.3	22048.4	19129.4	23636	27004.5
AMGNLQIDFADPQR	Q07984	Guanine nucleotide-binding protein G(i) subunit alpha-2	2919.69	5503.89	5961.27	7009.99	7368.71	7073.48	5947.89	N/A	5583.08	5926.76	3198.83	6609.2	N/A	6639.91	N/A	6800.48
ALIDMYAEGVADLDEIVLHYPYIPPGEK	Q08163	Glutathione S-transferase alpha-3	557.08	3393.32	3019.65	3282.31	N/A	1599.15	2265.99	2644.74	2481.12	3995.84	1664.1	N/A	2117.67	1679.12	N/A	2929.36
LGLDFPNLPYLIDGSR	Q08406	Glutathione S-transferase Mu 1	1175.51	14800.8	11841.5	7530.34	23458.9	9141.37	2122.89	4099.3	8344.56	11486.4	8477.4	11142.3	8519.68	11906.2	5866.96	6908.24
STCLYGQLPK	Q08602	Glutathione S-transferase P	36683.1	41628.8	36040.2	25335.8	33466.9	35632.9	40371.7	37738.8	20529	32783.4	35777.2	38427.2	31598.5	32054.2	37692.6	46004.1
PPYTIVYFPVR	Q08834	Glutathione S-transferase P	2797.11	10065.1	4778.22	4686.31	11749	3803.71	3440.78	3931.67	5893.83	6065.84	3284.26	2442.96	6843.86	9283.85	2974.19	5300.66
FEDGDLTLYQSNAILR	Q08849	Glutathione S-transferase P	4040.53	5315.33	4442.03	3028.1	4602.89	3170.24	4829.28	4908.94	1998.16	3009.8	4289.86	4415.23	3883.63	4327.67	3852.92	5465.02
EAALVDMVNDGVEDLR	Q08877	Glutathione S-transferase P	3056.56	10649.2	15825.4	13780	17837	10299.2	7754.01	6284.77	6928.39	12387.9	6115.21	11376.9	4594.84	8163.22	5768.9	8669.54
QLLLTADDR	Q09073	Fructose-bisphosphate aldolase A	670562	707691	633489	577163	641790	700167	691272	721835	624650	606220	632855	792936	726718	685472	850182	699848
ADDGRPFPQVIK	Q09167	Fructose-bisphosphate aldolase A	142180	114826	138881	115627	160769	133916	127851	148463	136044	138301	150280	138324	131376	156624	156308	145923
PHPYPALTPEQK	Q0VGK4	Fructose-bisphosphate aldolase A	91932.9	96462.5	62176.7	74041.1	101155	80227.2	82761	83220.2	83322.7	73085.2	83680.2	78209.5	74055.6	95459	88390.9	95311.5
YTPSGQSGAAASESLFISNHAY	Q10836	Fructose-bisphosphate aldolase A	85986.8	49082.6	105222	112736	99341.1	125875	104876	104582	113519	89937.4	95599.5	101604	98189.3	94981.4	104782	96078.3
LQSIGTENTEENRR	Q1HAQ0	Fructose-bisphosphate aldolase A	55077.2	21868	7287.53	12359.7	13945.7	10720.4	9103.28	3538.21	11578.3	6745.37	14357.2	8693.42	8983.12	10104.2	8169.7	4724.69
FSNEEIAMATVTALR	Q1HCL7	Fructose-bisphosphate aldolase A	18415.2	52767.8	47027.1	47458.7	87084	48256.5	44224.2	37385.9	43662.9	37200.8	35640.5	44432.4	36780.2	46526.8	38199.2	43848.2
TVPPAVPGVTFLSGGQSEEEASINLNAINK	Q1JU68	Fructose-bisphosphate aldolase A	59127.1	85220.5	33566	50003.9	42720	156626	59830.7	73581.6	32677.8	48556.6	46777	93775.8	75847.9	96952.6	125457	56294
GILAADESTGSIAK	Q1WIM2	Fructose-bisphosphate aldolase A	1.30125e+06	1.39504e+06	666489	1.19828e+06	1.29313e+06	1.40643e+06	1347204	1.48894e+06	679336	1.16073e+06	1.29342e+06	1655827	1.25361e+06	1436792	1.50558e+06	1.48174e+06
GVVPLAGTNGETTTQGLDGLSER	Q1WIM3	Fructose-bisphosphate aldolase A	30841.5	41320.3	66481.5	55923.3	67328.9	62717.6	46158.8	38388.5	60841.5	43022	40919.9	66869.3	46543.9	44453.6	50231.2	43870.4
IGEHTPSSLAIMENANVLAR	Q27W01	Fructose-bisphosphate aldolase A	28418.7	50740.2	50420.1	36444.8	61182.5	23987.7	52245.6	45479.3	39233.1	46104.7	40654.6	32980.2	31966.6	44913.5	36622.7	38621.8
VNPCIGGVILFHETLYQK	Q27W02	Fructose-bisphosphate aldolase A	8215.01	17083.9	5274.67	459.638	5317.65	N/A	6634.39	8373.29	5509.8	9015.63	6337.52	N/A	6993.04	10683.9	3585.08	6346.22
FSVSPVVR	Q2A121	Elongation factor 2	124552	131379	137726	140034	147498	156730	153103	153519	154669	118900	131252	176103	161802	135102	181187	156205
GGGQIIPTAR	Q2IBD4	Elongation factor 2	113699	114372	114713	107169	106671	131098	131970	113923	119286	96557	107001	141010	111298	97827	143290	139589
VFSGVVSTGLK	Q2PQA9	Elongation factor 2	73492.6	84245.2	78520.4	94689	94862.7	103953	106366	93166.7	97957	84076.1	70315.4	77292.6	103858	86526.1	86963.9	109769
STLTDSLVCK	Q2TA68	Elongation factor 2	72012.5	76932.6	70716.3	71513.8	65024.6	67890.1	73072.4	76001.9	66913.9	61326.4	70168.4	72923.6	72757.8	60674.7	75981.9	74876.6
GVQYLNEIK	Q2TL32	Elongation factor 2	64093.4	67668	66997.9	67627.9	69567.9	80142	76791	69314.9	68022.5	61927.4	67184	81786.3	78836	67008.2	84742.3	84822.6
ETVSEESNVLCLSK	Q2WEA5	Elongation factor 2	47733.9	36423.8	40090.9	41081.4	39292.3	44754.2	48195.9	40070	38077.4	32900	43962.9	54257.5	42058.5	37473.1	50737.9	49560.4
EDLYLKPIQR	Q32PX2	Elongation factor 2	22626.1	19911.6	17028.3	19293.2	21275.7	20392.6	22227.5	22336.7	22385.4	16049.5	19290.4	23713.8	21237.7	17661.8	22390.4	21415.3
YEWDVAEAR	Q32PX7	Elongation factor 2	58782.9	25109.6	12516	6527.83	6089.1	24637.8	29501.7	24784.6	23383.9	11681.6	26795.1	28273.2	19756.3	18576.2	22510.5	29462.7
VTDGALVVVDCVSGVCVQTETVLR	Q32Q06	Elongation factor 2	1192.55	1190.27	1165.94	986.677	N/A	1132.89	3904.46	7509.8	1778.78	N/A	2033.61	1798.71	2577.3	2017.45	2989.29	2237.32
ARPFPDGLAEDIDK	Q3B7U9	Elongation factor 2	7355.81	2058.48	4315.41	7134.37	5770.61	4763.13	5600.81	4867.74	4777.33	7375.65	3440.69	3780.65	3339.53	3224.57	4469.59	5246.62
DLEEDHACIPIK	Q3B8Q0	Elongation factor 2	4523.22	11626.2	25836.3	22378.5	13017.8	11946.2	23474.7	24319.9	34619.7	23425.7	13208.6	14770.6	13836.6	29900.3	13840.4	25596.6
ALLELQLEPEELYQTFQR	Q3B8Q1	Elongation factor 2	868.354	N/A	1413.39	961.562	1449.84	N/A	1872.08	2505.8	1391.85	N/A	1134.43	2190.8	1580.69	N/A	1991.73	1895.41
AYLPVNESFGFTADLR	Q3B8Q2	Elongation factor 2	7550	4650.61	2436.73	2703.71	1752.9	3208.86	5307.99	7451.08	3972.86	3139.68	5733.77	5880.54	8240.28	5534.26	6350.93	7676.19
KEDLYLKPIQR	Q3KR59	Elongation factor 2	3804.78	N/A	3790.92	3887.84	5643.65	1174.88	5443.51	4642.54	4252.1	5408.99	4286.52	1158.75	3369.52	4812.16	N/A	4886.69
VNFTVDQIR	Q3KR86	Elongation factor 2	78733.6	85926.8	71840.4	71124	75244	76190.6	85551.5	77875.9	75259.7	69453.4	72825.7	87433	85496.9	73803.5	80879.2	89958.6
TFCQLILDPIFK	Q3KRC5	Elongation factor 2	15696.7	38507.5	30706.7	30413	65438	40363.6	19872.6	19250.6	32833	33614.1	20197.5	34743.5	52517.1	31952.1	31092.3	32378.9
EGIPALDNFLDKL	Q3KRD8	Elongation factor 2	2868.58	17964.5	18530.7	9750.58	27880.9	8559.88	14137.7	8037.21	14442.6	14931.3	12742.3	26982	23507.2	18066.2	20987.8	25452.6
VFDAIMNFR	Q3KRE0	Elongation factor 2	5198.06	15443.8	15542.8	20533.5	25529.1	16514.2	16954.9	14752.8	18074.6	17435.4	9994.76	14143	16591.4	17359.4	9696.19	15145.5
DSVVAGFQWATK	Q3KRE8	Elongation factor 2	24150	14328.3	6603.03	1504.36	1328.22	9406.14	15325.1	14383.3	12682.2	4280.12	14346.2	13783.3	12959.3	9500.88	15272.4	13862.5
CLYASVLTAQPR	Q3MHU5	Elongation factor 2	10674.2	12038.8	6904.15	7117.06	8848.36	8207.65	9659.74	8401.13	7468.49	8255.47	9573.88	6972.05	11063.8	8626.89	10688.3	11097.3
IMGPNYTPGK	Q3MIE4	Elongation factor 2	N/A	15136.6	5958.76	9235.18	10766.5	9810.04	10335.4	7591.81	10482.4	7207.27	6482.32	6262.67	9986.58	6212.84	6720.27	7110.13
YVEPIEDVPCGNIVGLVGVDQFLVK	Q3SWS9	Elongation factor 2	2860.57	17313.4	9038.03	13160.3	N/A	25228.1	6167.11	4871.85	14814.5	7779.85	9609.82	13587.2	14601.1	10631.4	9014.85	12110
QFAEMYVAK	Q3SWU3	Elongation factor 2	N/A	1813.72	4779.6	4162.44	6064.55	3539.64	2460.79	3825.76	5474.6	4487.31	1221.71	1819.67	1684.62	3610.24	N/A	2376.69
GHVFEESQVAGTPMFVVK	Q3T1K5	Elongation factor 2	3533.05	5784.39	10970.7	11412.1	16817.3	3650.74	11896.3	5723.35	9756.56	10518.4	4753.34	4994.95	3768.87	8085.19	2350.1	2262.92
EVLEYNTVGGK	Q496Z0	Farnesyl pyrophosphate synthase	8264.1	11650.3	15327.6	13197.1	11865.2	19091.1	12877.2	13006.3	10882.2	11116.6	18694.6	16888	11934.6	11600.6	13277.4	14268.7
ALYEELDLR	Q497B0	Farnesyl pyrophosphate synthase	6784.38	6641.11	4433.92	4514.13	3597.77	4851.52	6754.95	7745.14	4189.63	3758.3	5574.82	6451.43	4396.94	5220.28	7252.09	5987.37
VLTEDELGHPEK	Q498M4	Farnesyl pyrophosphate synthase	2102.32	2174.86	1854.45	1809.13	1476.51	2183.94	2275.53	1688.42	2555.73	1416.07	1447.38	2123.51	1778.71	1683.36	2328.07	1634.38
GLTVVQTFQELVEPR	Q498U4	Farnesyl pyrophosphate synthase	1288.99	6792.4	2404.22	1988.38	4327.2	4184	1531.65	1703.94	1983.4	2567.51	1919.86	6163.02	6911.59	2752.4	2510.77	2893.17
LEEFFAR	Q4AE70	Glucose-6-phosphate 1-dehydrogenase	15574.8	20409.5	16380.1	17001.8	19274.2	17049.8	15115	21058.9	20084.4	15940.2	19041.3	20611.3	19945.5	18557.3	19479	19730.9
LTVDDIR	Q4AEF8	Glucose-6-phosphate 1-dehydrogenase	10752	8871.37	11172.3	9514.62	9510.6	11497.9	12501.8	9946.89	9537.36	9158.35	8123.87	10091.5	8238.9	6493.06	10155	10592.3
VGFQYEGTYK	Q4FZT0	Glucose-6-phosphate 1-dehydrogenase	10703	7888.8	6034.6	7169.95	6333.96	7778.71	7414.34	6913.24	5391.88	6548.39	7318.26	7465.23	8328.05	7291.04	7336.87	8090.5
IIVEKPFGR	Q4FZT2	Glucose-6-phosphate 1-dehydrogenase	3742.05	4656.08	4109.16	4127.95	4752.09	3636.3	4513.29	4550.31	4425.06	3734.81	4164.11	3494.09	4385.4	4327.22	3936.98	4506.13
DVAGDIFHQQCK	Q4FZT9	Glucose-6-phosphate 1-dehydrogenase	2892.65	3755.99	4669.71	4713.27	5310	3639.96	4258.16	4454.58	4459.5	2742.77	4667.73	3233.88	2974.37	4267.48	4051.64	3755.28
LFYLALPPTVYEAVTK	Q4FZU2	Glucose-6-phosphate 1-dehydrogenase	1952.46	10134.7	6150.12	10670.1	23020.6	10650.4	2763.5	2791.94	4496.68	10718.1	3870.74	5282.57	11612.2	8373.09	6472.63	5868.46
DGLLPEDTFIVGYAR	Q4FZU8	Glucose-6-phosphate 1-dehydrogenase	4617.83	9668.86	13036.1	9997.39	21501.7	14297.8	7110.81	9292.06	8302.47	9316.6	10292.5	14263.6	17741.5	11373	12503.7	14374
GGYFDEFGIIR	Q4FZX7	Glucose-6-phosphate 1-dehydrogenase	5941.24	9812.72	9466.86	6679.28	10474.1	7538.35	9367.4	10500.2	9195.02	8121.16	9105.01	13768.4	14194.1	10484.2	12425.9	12485.2
NSYVAGQYDDPASYK	Q4G061	Glucose-6-phosphate 1-dehydrogenase	11927.4	9635.48	4899.45	6571.29	6721.9	8651.3	6408.85	8370.7	5688.34	5774.79	6831.92	8483.54	9645.42	7735.69	8082.58	7389.96
DNIACVILTFK	Q4KLF8	Glucose-6-phosphate 1-dehydrogenase	2084.2	2142.85	1280.57	2682.46	674.467	1343.48	1625.22	2071.9	1709.54	1666.77	916.2	583.671	2138.86	1081.51	1237.86	1544.47
VPAVPETLK	Q4KLH4	60S ribosomal protein L7	5216.05	5079.62	7187.37	7107.32	6133.27	6255.22	7635.31	5227.22	6555.28	6776.94	5535.84	5455.64	4921	5795.01	5917.91	7361.49
AGNFYVPAEPK	Q4KLL0	60S ribosomal protein L7	6415.39	4363.32	6000.69	5455.56	5219.09	5846.11	7050.51	5547.42	4397.83	4534.52	6532.65	4687.15	4755.88	6170.76	5268.57	6665.78
SVNELIYK	Q4KLL4	60S ribosomal protein L7	6067.1	5124.14	7282.96	6610.39	5322.08	6502.19	7301.98	5189.4	5350.57	4815.01	6722.18	5457.52	N/A	5789.68	N/A	7420.39
KVPAVPETLK	Q4KLZ6	60S ribosomal protein L7	1344.98	2840.34	2196.24	1518.13	1522.16	1728.82	2615.36	2732.33	1927.47	1302.66	2064.19	2069.49	N/A	3151.5	2533.9	2792.36
IALTDNSLVAR	Q4KM49	60S ribosomal protein L7	7375.8	10164.5	12475.9	10902	9835.56	10019.8	14584.9	9245.84	10309.3	9010.37	10987.7	9391.45	8252.23	10952.9	9540.73	14868.9
ANPYECGFDPTSSAR	Q4KM73	NADH-ubiquinone oxidoreductase chain 3	15302.4	9945.07	6942.77	6874.43	7385.11	9746.96	10187.2	10299.2	8985.63	7524.15	10075.5	12274.6	6885.75	8674.02	11471.9	11040
VSIILDPLTK	Q4QQT4	NADH-ubiquinone oxidoreductase chain 4	3790.64	6001.05	5166.08	7885.07	8508.05	9969.96	5790.72	5404.41	7842.03	5916.06	4896.18	7861.01	6252.57	6804.32	6466.08	7079.92
GTEELYAIK	Q4QQW4	Protein kinase C alpha type	28549.6	18015.4	19116.7	23224.4	22662.7	26404.5	24698.2	24375.7	22292	21531.1	21400.8	25123.8	27930.9	23194.9	30691.1	24766.9
EIQPPFKPK	Q4QR85	Protein kinase C alpha type	13438.3	9253.7	9056.57	11737.2	9795.91	11621.6	10569	9645.06	11385.7	9888.04	11547.9	11532.7	13266.6	11521.7	13070.3	11068.6
KGTEELYAIK	Q4QRB4	Protein kinase C alpha type	2276.67	895.016	881.305	2035.24	1843.93	2202.79	2252.01	1371.65	2021.34	1462.43	1477.52	1810.61	1990.19	1536.49	2037.64	1917.29
LLNQEEGEYYNVPIPEGDEEGNVELR	Q4V7A0	Protein kinase C alpha type	2624.1	1826.74	1773.36	3742.64	N/A	5432.15	3138.53	2570.07	2155.54	1685.77	2283.8	2292.92	N/A	1190.75	3421.58	2941.94
STLNPQWNESFTFK	Q4V7C6	Protein kinase C alpha type	12890.8	6287.23	2680.49	N/A	N/A	4863.89	8280.5	5391.43	4079.85	1627.02	6135.73	6181.25	4388.95	3842.08	8636.71	6382.37
GAALITAVGVR	Q4V7C7	Hexokinase-1	86566.2	101593	86235.9	137967	91055.3	148691	98649.1	96470.8	165547	105541	96561.6	117077	99659.4	112392	95492.9	152326
ITPELLTR	Q4V7D2	Hexokinase-1	75427.7	75706.7	99569.1	124810	85698.5	176429	120080	110215	151454	90609.2	112485	141403	76535	90043.5	116736	159202
FLSQIESDR	Q4V8B0	Hexokinase-1	68675.5	63898.4	79492.3	107753	72944.1	132767	86801.3	83943.4	128598	83268.7	101192	113912	65045.3	76610.4	86490.1	115980
LALLQVR	Q4V8C3	Hexokinase-1	45633.7	61865.2	62514.5	104291	72861.2	122941	79570.9	70641.1	126490	82733.4	74059	86074.8	72994.4	75358	75980	121593
TTVGVDGSLYK	Q4V8C7	Hexokinase-1	60691.5	51126.2	67458.3	101003	65165.1	138805	75898.4	76808.9	109261	75004.5	81049.4	85702.8	58944.6	66459.3	66927.2	116906
EGLLFEGR	Q4V8C8	Hexokinase-1	47790.3	50867.8	48957.2	65045	49635.8	98466	70347.2	59254.2	79862.9	51801.4	69736.9	88652.2	49443.8	60831.4	55711.7	88804.5
FNTSDVSAIEK	Q4V8F9	Hexokinase-1	59898.3	44541.7	49384.2	66041.2	43349.1	99903.6	60132.8	54077.1	73556.4	45944.3	64855.1	76207	41582.7	47185.3	53972	81198
VVDEYSLNSGK	Q4VSI4	Hexokinase-1	33868.1	30453.8	22573.1	39999.2	25068.6	62350.4	38436.3	33731.5	41776.1	29368.6	35081.3	46776.6	28229.4	25911.4	35931	47092.9
HIDLVEGDEGR	Q505J6	Hexokinase-1	12259.3	10955.9	14920.4	19823.8	14862.3	24871.3	16806.2	15479	20995.7	14050.6	16471.4	22968.3	11556.9	14597.5	16058.4	23196.1
SANLVAATLGAILNR	Q505J8	Hexokinase-1	865.834	14864.6	6457.05	14692.4	22286.9	14582.2	5166.46	3343.87	18776.4	14521	5450.35	7634.1	15809.2	15914.9	3142.73	8524.19
ATDCEGHDVASLLR	Q505J9	Hexokinase-1	13829.6	13869.7	16144.5	20872.7	15051.8	31926	20019.9	19631.2	24579.4	17454	22412.2	22607.6	14121.3	16972.2	18821.1	27747
QIEETLAHFR	Q53E76	Hexokinase-1	9935.13	11534.5	9974.51	11947.9	10274	13186.9	11356	11357.4	14605.2	11895.9	12868.5	14550.6	8036.45	11927.3	11344.1	15994.3
AILQQLGLNSTCDDSILVK	Q561S0	Hexokinase-1	3628.59	7228.57	3668.38	7397.13	2661.73	11406.1	4779.31	4438.65	5822.62	4280.72	4527.15	5666.18	3391.91	4168	3561.32	6265.87
LSDEILIDILTR	Q562A2	Hexokinase-1	1633.16	8513.38	7964.58	5281.76	6509.64	13338	6720.62	7812.79	4191.25	2581.05	4876.23	8112.73	11989.3	7416.96	5409.35	7350.69
GDFIALDLGGSSFR	Q562B5	Hexokinase-1	36007.3	42528.4	59400.6	63523.6	49162	87001.8	63110.9	64903.7	70635.1	47608.6	67927.8	98619.3	49524.4	51336.2	65408.5	101864
SIPDGTEHGDFLALDLGGTNFR	Q56A18	Hexokinase-1	17457.5	36008.9	36017.6	18831.7	17160	28247.7	45465.8	43128.4	38714.7	25659.5	38820.2	50579.7	23960.2	31868.4	41164	59749.6
CTVSFLLSEDGSGK	Q56A27	Hexokinase-1	4477.23	4166.04	6080.95	8810.82	4798.15	10389.4	8675.32	6768.85	6893.05	6447.99	8111.81	7773.69	3523.99	5671.94	6207.96	10108.1
LPVGFTFSFPCR	Q5BJ92	Hexokinase-1	1404.88	6508.18	4323.83	8509.73	8266.91	10432.9	3821.84	3156.96	10455.6	9483.3	3063.09	3013.07	8856.05	9116.3	2325.86	4403.1
AAQLCGAGMAAVVEK	Q5BJS7	Hexokinase-1	4451.86	7368.04	6991.12	13323.2	12690.1	14826.5	9855.87	8094.32	15253.3	9789.28	7400.6	20874.7	11796.5	17144.1	6842.14	11127.2
LGVEPSDVDCVSVQHICTIVSFR	Q5BJT2	Hexokinase-1	4984	2979.99	2684.16	1481.56	1351.48	N/A	5374.22	5876.49	5579.83	5134.19	5425.77	4569.48	1991.85	5172.74	3438.86	8488.29
GLDHLNVTVGVDGTLYK	Q5BK32	Hexokinase-1	2274.04	4733.95	1398.96	1049.69	N/A	N/A	5200.85	5138	3826.33	1962.79	2659.99	N/A	1293.06	2931.38	961.38	3000.39
YIIIGDTGVGK	Q5BK63	Ras-related protein Rab-2A	20200.1	27774.1	20567.4	22914.9	21867.5	21583	25757.1	20881.5	21147.2	17280	21419.1	24339.4	24151.3	22965	23531.6	24632.5
SCLLLQFTDK	Q5BK68	Ras-related protein Rab-2A	3535.03	6044.24	3789.75	4462.29	2994.46	2195.59	3107.24	3825.32	2845.46	3743.6	3171.03	2901.34	3198.34	3211.45	4649.22	3702.62
TASNVEEAFINTAK	Q5BK81	Ras-related protein Rab-2A	12729.7	10262.2	4694.45	9586.4	9461.64	8051.6	7872.54	8969.23	7711.11	6884.73	9897.92	10036.6	10037.6	9957.55	11301.6	11714.7
GAAGALLVYDITR	Q5EB77	Ras-related protein Rab-2A	19851.2	41751.2	36890	31263.7	38703.2	33664.2	36729.9	40649.8	31305.7	27161.5	32986.2	50168.7	39394.1	36381.6	44761	44772.3
LAEVALAYAK	Q5EB81	Delta-aminolevulinic acid dehydratase	823.871	2112.15	2915.55	800.729	3056.84	N/A	2304.51	1486.32	1541.43	2018	1922.39	N/A	1112.64	1473.47	1529.15	3433.45
LPSDVVEESAR	Q5EBA1	Alpha-2-macroglobulin	8850.16	16261.3	12348.6	18847.7	12575.9	16061.2	9828.2	14531	16576.9	7775.41	16418.8	16334.1	15153.9	14014.2	16323.5	10997
YEIENCLANK	Q5EIC4	Alpha-2-macroglobulin	3991.09	4642.48	4208.81	5691.13	4647.25	4441.92	3573.37	4301.43	5151.64	2347.53	5900.64	4467.8	6304.48	4410.6	5374.81	3246.2
ELCGNEVPVVPEQGK	Q5EXX3	Alpha-2-macroglobulin	8271.39	7287.68	5240.36	8849.94	5141.36	7421.49	3316.84	7817.78	5804.12	2627.79	8105.17	8727.63	8658.98	7252.75	8905.37	6240.56
DLTGFPQGADQR	Q5FVC2	Alpha-2-macroglobulin	9979.35	7721.57	7985.74	12282.7	8477.62	9254.02	6315.09	9864.72	8692.04	3793.28	10857.3	9975.81	10034.2	8345.91	9581.67	7499.17
GCFSQLVK	Q5FVF1	Alpha-2-macroglobulin	6174.46	6456.86	6903.72	8047.39	6038.31	6177.99	4381.47	6950.97	6460.98	3105.42	7520.54	6885.01	8103.3	7161.11	8774.46	5297.51
VAVQLEASPDFLAAPEEK	Q5FVH2	Alpha-2-macroglobulin	2501.47	2832.27	1380.21	3027.48	1833.73	3537.75	1508.95	2589.39	1806.44	804.372	1833.89	N/A	4067.75	2721.88	3257.67	1815.87
VTLPTVPGDYTVK	Q5FVI6	Alpha-2-macroglobulin	6845.75	7671.04	9482.57	16491.8	9742.46	12781.9	8362.83	9080.7	10022	4399.78	10817.3	11920.2	12788.8	10286.9	12446.6	7767.14
AIAYLNTGYQR	Q5FVJ0	Alpha-2-macroglobulin	5345.36	5991.25	5556.31	8531.63	6374.39	5076.54	4479.55	5129.01	6500.01	3589.36	6674.6	4415.83	7773.94	7526.13	5391.34	4469.66
ATVLNYLPTCIR	Q5FVJ8	Alpha-2-macroglobulin	2447.06	5764.24	2918.32	7507.3	5410.58	6206.57	2496.89	2738.94	4844.92	2341.98	3938.56	3267.14	8471.54	6098.56	5654.88	2328.01
LVLYAILPNGEVVGDTAK	Q5FVL2	Alpha-2-macroglobulin	1522.48	1926.3	1574.49	2162.81	2155.06	N/A	766.691	1290.8	1637.94	989.262	1858.84	1813.43	2231.07	1510.85	2497.58	1187.09
GIVVYTGDR	Q5FVM1	Sodium/potassium-transporting ATPase subunit alpha-1	196424	163841	158129	152314	178116	157503	176453	188447	182814	159809	171992	189124	208067	157966	196386	202812
YHTEIVFAR	Q5FVM4	Sodium/potassium-transporting ATPase subunit alpha-1	61998.7	53493.9	38384.8	30208.4	45756.1	26815.3	46223	50570.6	47489.8	51113.9	42883.8	42051.5	63648	51951.5	48155.1	52983.1
DAFQNAYLELGGLGER	Q5FVQ4	Sodium/potassium-transporting ATPase subunit alpha-1	18864.3	24865.7	27050.5	38474.6	24916.3	54186.5	29552.9	30783	24225.9	27521.4	22104.4	42082.4	38640	25145.6	40943.1	36494.7
LSLDELHR	Q5FWT7	Sodium/potassium-transporting ATPase subunit alpha-1	31463	58853.7	45873	51778.1	44734.2	55944.3	51008.7	58024.9	58048.9	48716.6	55148.5	56160.4	61987.4	51414.2	60273.1	52138.1
AVFQANQENLPILK	Q5GFD9	Sodium/potassium-transporting ATPase subunit alpha-1	75439.3	208932	87524.4	87187.5	97590.6	146782	91230.6	101733	92936.2	76150.3	95249.4	119004	111511	84270.5	117168	200754
LNIPVNQVNPR	Q5HZA6	Sodium/potassium-transporting ATPase subunit alpha-1	317992	321418	137819	146367	169370	180453	158485	177393	173541	140998	165227	370956	188714	167390	196083	380282
MSINAEDVVVGDLVEVK	Q5HZE4	Sodium/potassium-transporting ATPase subunit alpha-1	11537.2	10204.2	22452.6	32552.9	29109.5	19591.4	14783.3	13908.6	15593.3	13904.4	10750.1	14822	11257.5	12026.3	13339.3	12861.8
SPDFTNENPLETR	Q5HZV9	Sodium/potassium-transporting ATPase subunit alpha-1	264081	223604	148185	152709	241870	300496	297574	290174	152932	214629	253792	323012	300689	240266	303271	280469
NIAFFSTNCVEGTAR	Q5HZY2	Sodium/potassium-transporting ATPase subunit alpha-1	29783.7	44786.6	14020.5	23273.8	28583.4	22839.9	37582.6	44372.3	28413.2	24814.9	35364	38115.2	41138.6	30522.1	40689.7	35732.4
AVAGDASESALLK	Q5I0D1	Sodium/potassium-transporting ATPase subunit alpha-1	317108	270092	266220	298510	294652	354522	322597	349983	330195	276584	278675	364022	345060	267082	340187	341762
IVEIPFNSTNK	Q5I0D5	Sodium/potassium-transporting ATPase subunit alpha-1	133274	185066	144891	153903	151621	188713	169962	148420	168349	131673	136853	175916	167778	133368	178165	163260
ADIGVAMGIVGSDVSK	Q5I0D7	Sodium/potassium-transporting ATPase subunit alpha-1	3370.56	2930.41	6205.54	6642.51	8188.61	5189.14	6673.72	2882.1	6102.16	3796.67	3116.78	7817.46	9366.89	3172.28	2246.77	4353.06
TSATWFALSR	Q5I0E7	Sodium/potassium-transporting ATPase subunit alpha-1	26098.6	18027.1	3696.45	N/A	N/A	3789.73	12801.6	10747.4	10521	4636.82	13459.3	7940.49	6119.33	9969.07	8053.35	14271.3
KADIGVAMGIVGSDVSK	Q5I0G4	Sodium/potassium-transporting ATPase subunit alpha-1	13135.5	17809	15691	33323.4	49945.1	11783.7	10735.7	14594.7	19728.8	14857.4	8705.18	12910.7	15739.9	17627.5	8750.12	8467.72
DMTSEELDDILR	Q5I0H3	Sodium/potassium-transporting ATPase subunit alpha-1	4296.19	14909.8	30343.7	72673.3	N/A	23986.6	17667.5	14409.8	30620.6	17655.2	7784.36	47978.6	14645.1	12282.7	12085.5	40567.9
EQPLDEELKDAFQNAYLELGGLGER	Q5I0K5	Sodium/potassium-transporting ATPase subunit alpha-1	475.581	1757.44	2404.12	N/A	3306.38	N/A	1842.01	3202.96	1290.59	1297.82	1448.03	2333.25	1583.07	2157	2216.63	2544.35
CIEVCCGSVMEMR	Q5I0K7	Sodium/potassium-transporting ATPase subunit alpha-1	1634.99	6094.23	2683.6	5209.68	4803.03	4325.28	4815.39	2532.07	3168.52	2702.25	2659.05	2845.03	3543.4	5590.17	2337.91	3501.94
LSLDELGR	Q5I6B8	Sodium/potassium-transporting ATPase subunit alpha-2	34265.7	69585.7	38630.3	34442.8	55350.2	41128.4	70871.5	61425.3	34410.4	61135.8	52527.8	93712.9	48655.5	63000	34220.2	53206.2
DTAGDASESALLK	Q5M7A7	Sodium/potassium-transporting ATPase subunit alpha-2	42713.7	39151.6	28637.8	23060	33639.8	26334.3	47281.2	45542.5	22750.7	40323.8	41353.5	69631.9	30036.7	36673.7	22653.2	39066.3
DHTEIVFAR	Q5M7U6	Sodium/potassium-transporting ATPase subunit alpha-2	12594.3	16805	11992.2	9193.78	16309.8	9437.65	23173.7	19667.2	8755.75	19724.8	17992.8	26690.8	11826.7	15784	9340.9	16570.4
CIELSCGSVR	Q5M7V8	Sodium/potassium-transporting ATPase subunit alpha-2	10343.9	14170.5	9651.1	8212.53	11770.3	8509.08	16477.4	16523.8	6556.57	15473.8	15776.7	21505.4	9412.54	13422.5	8937.41	13095.9
YQLSIHER	Q5M7W5	Sodium/potassium-transporting ATPase subunit alpha-2	6580.22	7153.54	4769.02	3898.38	4797.5	3827.64	8739.15	9134.25	2927.42	8183.98	8528.1	12079.6	6520.55	7733.84	4047.8	8225.2
SPTWTALSR	Q5M819	Sodium/potassium-transporting ATPase subunit alpha-2	17100.5	12302.2	2991.08	N/A	1453.51	3843.41	14647.4	8575.09	3958.48	5531.46	10804.6	12474.9	2039.86	8129.64	2883.66	7943.64
SPEFTHENPLETR	Q5M821	Sodium/potassium-transporting ATPase subunit alpha-2	24586.4	15907.4	12004.3	18256.4	16835.9	19049.6	17473.7	14847.8	18013.8	21203.5	14807.8	22062.7	20277	13492.7	15225.7	12757.4
FDTDELNFPTEK	Q5M827	Sodium/potassium-transporting ATPase subunit alpha-2	12668.5	21092.1	13880.5	12685.6	20350.7	15636.5	28603.3	20422.3	10616.1	20923.3	19449.8	41755.7	14568.7	17796.9	9987.81	20361.1
VLGFCQLNLPSGK	Q5M868	Sodium/potassium-transporting ATPase subunit alpha-2	6483.34	20514.4	11324.2	12657.8	19854.7	15997.4	16183.6	16374	9484.71	19276.9	14644.2	21099.4	12482	17826.1	5937.35	14301
DMTSEQLDEILR	Q5M9G3	Sodium/potassium-transporting ATPase subunit alpha-2	3503.43	10692.2	8331.38	6857.61	15675.7	7979.51	11744.1	7842.04	7177.11	10894.1	6985.32	17747	4471.78	9963.6	2622.2	8427.94
ADIGIAMGISGSDVSK	Q5MPA9	Sodium/potassium-transporting ATPase subunit alpha-2	1760.1	5289.63	4457.8	4372.47	6419.67	2384.1	6656.44	4081.02	2123.67	6958.84	3281.29	4970	2313.13	4620.13	N/A	2986.37
KADIGIAMGISGSDVSK	Q5PPH0	Sodium/potassium-transporting ATPase subunit alpha-2	2564.25	8261.6	5296.32	5223.26	11889.3	3881.93	8067.69	5506.43	5268.91	11371.9	4275.46	6397.13	4615.36	6233.82	1498.12	4555.96
GGQDNIPVLK	Q5PPI4	Sodium/potassium-transporting ATPase subunit alpha-3	852003	706521	684691	800804	715170	897553	861602	834213	920863	705384	752911	969092	1.03125e+06	821553	1.07652e+06	859508
YQLSIHETEDPNDNR	Q5PPJ9	Sodium/potassium-transporting ATPase subunit alpha-3	229502	173184	159811	178366	181981	193159	175450	191634	199448	154971	170157	222474	211328	179089	212611	188315
EAFQNAYLELGGLGER	Q5PPL3	Sodium/potassium-transporting ATPase subunit alpha-3	111525	146014	121425	130409	105256	196044	160652	171638	140673	114557	129138	206906	203654	147627	226092	178457
CATILLQGK	Q5PPM7	Sodium/potassium-transporting ATPase subunit alpha-3	271634	265109	231526	254986	257955	311236	270177	271305	289331	279840	248551	289352	330800	281489	321266	264037
SPDCTHDNPLETR	Q5PPN7	Sodium/potassium-transporting ATPase subunit alpha-3	115074	73390.7	88151.8	92023.5	90826.1	117965	105675	104250	121402	82791.9	84257.3	135700	96270.2	100053	144155	108948
ACVIHGTDLK	Q5PQJ6	Sodium/potassium-transporting ATPase subunit alpha-3	67394.7	70184.4	80937.9	91439.2	80489	115070	102342	93947.5	94740.3	65248.5	80351.3	104360	109458	89163.9	131767	98295.9
YNTDCVQGLTHSK	Q5PQP9	Sodium/potassium-transporting ATPase subunit alpha-3	53143.2	39395.3	43102	37364.9	36408.4	43858.4	41960.9	36880.9	43068.7	31261.1	38034.1	48134.8	40505.8	32641.5	53872.2	41371.8
KVAEIPFNSTNK	Q5PQQ2	Sodium/potassium-transporting ATPase subunit alpha-3	4477.05	3866.76	3961.59	4629.04	4723.61	4882.85	4097.37	3581.6	5615.82	3433.03	4013.96	4840.51	5744.63	4083.77	4782.06	3107.34
TVNDLEDSYGQQWTYEQR	Q5PQX1	Sodium/potassium-transporting ATPase subunit alpha-3	56899.2	13625.1	13596.6	5304.53	4618.28	18462.7	22858.1	13292.3	19748.5	10028.1	21754.5	21419.3	11472.5	11396.5	19296.6	20906.1
RDVAGDASESALLK	Q5RJQ4	Sodium/potassium-transporting ATPase subunit alpha-3	10343.4	10950.2	9247.63	9755.72	9090.58	11274.4	19450.7	10075.4	11870.2	10594.9	8768.07	10590	11872.2	10641	10031.1	10796.1
MQVNAEEVVVGDLVEIK	Q5RJR2	Sodium/potassium-transporting ATPase subunit alpha-3	26560	28349.8	57092.9	77213.1	64322.5	42625.5	42591.1	41928.3	40102.1	34496.5	23150.8	33556.1	29249.7	29301.2	34772.1	29646.7
CIELSSGSVK	Q5RJR8	Sodium/potassium-transporting ATPase subunit alpha-3	5469.82	N/A	5314.95	7079.9	4914.8	9466.6	7480.9	10557.3	7674.82	4608.52	9086.31	8668.66	11056.4	8036.82	9704.27	6728.32
ADIGVAMGIAGSDVSK	Q5RK09	Sodium/potassium-transporting ATPase subunit alpha-3	29929.9	71904	42546.7	60767.4	95720.1	44224.7	41752.1	40339.8	53935.9	45236.3	27744.7	40836.2	45990.4	44080.9	41192	32749.8
NITFFSTNCVEGTAR	Q5RKH0	Sodium/potassium-transporting ATPase subunit alpha-3	48370.2	141804	52872.9	67457.8	53891	71899.1	70527.9	136892	57709.6	49069.6	108883	118484	128964	103166	133441	118459
KYNTDCVQGLTHSK	Q5RKH1	Sodium/potassium-transporting ATPase subunit alpha-3	7308.81	12568.1	7003.58	6513.73	4899.03	6536.82	7408.97	6631.33	7664.84	7310.64	5997.91	13892.2	7052.77	6140.22	4731.66	6173.5
DVAGDASESALLK	Q5RKI0	Sodium/potassium-transporting ATPase subunit alpha-3	742038	613282	289621	347925	621044	420580	781843	740968	425889	551223	638994	972727	857238	699093	906496	771675
KADIGVAMGIAGSDVSK	Q5RKI1	Sodium/potassium-transporting ATPase subunit alpha-3	57291.5	73644	57126.9	77901.8	105450	53900.1	52145.9	47490	84379	68773.9	35077.3	44874.4	57698.2	67310.2	41100.5	43643.4
IATLASGLEVGK	Q5SGE0	Sodium/potassium-transporting ATPase subunit alpha-3	608411	652322	529834	738030	668769	859629	620588	762834	919740	617184	599565	783065	923300	693911	881085	716745
DFTSEQIDEILQNHTEIVFAR	Q5U1Z0	Sodium/potassium-transporting ATPase subunit alpha-3	20196.7	12533.5	8619.11	2800.38	6625.93	4247.57	19402.5	28602.5	14066.3	5696.59	15488.4	15347.8	15653.8	12990.7	15918.4	12347
VLGFCHYYLPEEQFPK	Q5U211	Sodium/potassium-transporting ATPase subunit alpha-3	31008.1	36373.3	34276.7	18050.2	49179.7	16515	48733.6	28825.5	45103.9	49222.4	23373.7	54883.1	69970.4	30626.9	31748.1	53473.7
EQPLDEEMKEAFQNAYLELGGLGER	Q5U2N3	Sodium/potassium-transporting ATPase subunit alpha-3	1754.04	1755.67	4212.89	1301.51	3128.38	N/A	3600.16	2415.42	1619.99	2699.75	2959.04	2348.26	2054.09	1346.48	2568.07	2500.19
MAAFILR	Q5U2N8	Beta-glucuronidase	5185.12	10610.3	5755.77	6351.22	8331.01	N/A	4206.88	7177.69	11756.8	5616.36	6813.27	4042.89	11678.3	9665.04	6394.85	6318.1
LTPEEIER	Q5U2Q3	Endoplasmic reticulum chaperone BiP	39461.7	47807.3	45980.2	43726.8	50433.9	48311.1	48183.6	57191.6	47975	49472.9	50073.6	64568.7	51796.9	42220.5	51291.2	56091.5
ITPSYVAFTPEGER	Q5U2Q7	Endoplasmic reticulum chaperone BiP	25645.2	33328.6	32146.4	32258	30688.3	37728.6	37532.4	40880.7	31459	30438.1	33912.8	45450.1	37132.5	31262.8	35976.9	35997.6
SQIFSTASDNQPTVTIK	Q5U2R0	Endoplasmic reticulum chaperone BiP	17053.1	27492.7	15593.1	16420.2	18987.1	18857.9	19785.8	22482.9	15407.3	16861.1	19995.1	26185.4	21484.3	19784.8	22909	23295.7
NQLTSNPENTVFDAK	Q5U2U7	Endoplasmic reticulum chaperone BiP	67254.3	78015	28100.8	28797.4	30789.4	34489.5	32401.9	40322.6	26277.7	28775.8	38120.6	45447.3	36946.1	34566.6	80825.8	32299
SDIDEIVLVGGSTR	Q5U2Y1	Endoplasmic reticulum chaperone BiP	12180.8	32268.2	16003.7	13216.8	12737.5	17672.1	18690.4	20499.5	23826.2	12945.9	31857.2	49773.7	35871	30495.7	40909.8	19983.2
TKPYIQVDIGGGQTK	Q5U2Z3	Endoplasmic reticulum chaperone BiP	30708.1	52194.1	34354.4	24967	53416.5	46919.2	31756.3	46916.9	24389.4	32383.9	17220.8	32438.2	28919.3	52757.6	29840.1	40849.1
KSDIDEIVLVGGSTR	Q5U300	Endoplasmic reticulum chaperone BiP	39459.1	38147.7	19297.3	33848.1	40271.2	29711.6	43005.5	25835.3	37164.3	18753.9	20965.9	54881.8	42201.4	38009.8	43307.4	47981.8
LYGSGGPPPTGEEDTSEKDEL	Q5XFW8	Endoplasmic reticulum chaperone BiP	3954.31	3788.19	1185.86	1394.92	997.032	1870.5	2129.8	1456.22	1269.85	1549.8	2180.52	3098.01	1695.31	N/A	N/A	1879.35
NELESYAYSLK	Q5XHY5	Endoplasmic reticulum chaperone BiP	42851.8	40832.5	35094.7	34775.2	39624.7	45372.5	45294	56328.1	34738.1	33685.1	46810.8	58736.4	52438.1	41179.4	47972.6	47178.2
ELEEIVQPIISK	Q5XHZ0	Endoplasmic reticulum chaperone BiP	25503.5	36449.8	36025.3	37324.3	40496.8	61226.9	39338.6	49182	33644.1	31425.9	37798.4	66195.8	45505.4	39935.9	46843	45887.5
TWNDPSVQQDIK	Q5XI01	Endoplasmic reticulum chaperone BiP	46024.7	16288.4	7807.34	3270.76	3067.04	9573.5	16442.5	15066.8	12061	7175.91	20181.9	17408.8	7929	11043.8	14937.9	19163.8
FEELNMDLFR	Q5XI31	Endoplasmic reticulum chaperone BiP	957.104	5612.36	8761.62	12182.6	10532.1	7856.73	7803.27	7153.62	6506.39	9234.35	4014.94	9425.67	5144.94	6660.66	4195.9	6503.28
DNHLLGTFDLTGIPPAPR	Q5XI32	Endoplasmic reticulum chaperone BiP	18575.3	57234.2	67183.6	69350.2	94868.1	76121.7	58778.9	33277.7	58793.1	61451.1	30189.3	99397.8	88067.1	58951.1	71928.5	68687.9
DAGTIAGLNVMR	Q5XI60	Endoplasmic reticulum chaperone BiP	10897.8	57625.4	51650	56161.1	70776.5	47757.7	56736.8	50582.6	52223.7	49905.3	18077.5	59324.9	48836.5	38070.1	31322.6	47392
VTHAVVTVPAYFNDAQR	Q5XI72	Endoplasmic reticulum chaperone BiP	41886.3	41711.1	29653	34909.3	40089.7	34950.5	33777.9	39108	33117.9	20358.7	33934	33183.6	41213.4	19131.1	33829.2	35976.8
AKFEELNMDLFR	Q5XI73	Endoplasmic reticulum chaperone BiP	N/A	1808.68	3974.89	2380.38	5716.79	N/A	3329.44	2354.28	2590.16	4277.47	1940.78	2310.54	1908.04	3000.8	N/A	N/A
GAVSPVGVQPILNK	Q5XI78	Haptoglobin	N/A	3029.97	6022.06	4059.5	3530.97	654.574	1800.16	1652.3	976.238	1220.32	6743.23	1193.37	1865.09	9118.45	6324.18	930.669
LPVALDPGSK	Q5XI81	Dolichyl-diphosphooligosaccharide--protein glycosyltransferase subunit 1	26382.8	29700.9	37291.3	39938.7	34324.5	36393.6	34602.3	37228.6	38633.8	32718.8	33304.5	42928.2	38917	32740.6	31891.3	35913.2
IILPEGAK	Q5XI97	Dolichyl-diphosphooligosaccharide--protein glycosyltransferase subunit 1	26073.9	25141.2	33957	26025.6	26682.6	34284.6	38060.3	29974.6	27608.9	27394.7	23895.8	34677.2	25160.9	22558.2	27442.9	36765
SEDILDYGPFK	Q5XIA1	Dolichyl-diphosphooligosaccharide--protein glycosyltransferase subunit 1	8930.4	17425.7	14368.9	15674.3	15482.7	24513.7	18375.5	21543.8	17738.2	11535.3	16179	31380.1	24641.7	18721.9	22842.9	24088.4
DIPAYSQDTFK	Q5XIA8	Dolichyl-diphosphooligosaccharide--protein glycosyltransferase subunit 1	13949.2	9031.75	10877.2	10372	10342.5	13481.5	11608.6	12666.2	11061	9854.3	12622.7	13609.4	11950.2	9460.8	12420.9	10993.1
NIQVDSPYDISR	Q5XIC0	Dolichyl-diphosphooligosaccharide--protein glycosyltransferase subunit 1	11317.5	8579.38	9985.71	9219.06	9422.28	9649.97	11250.2	10822.9	9243.81	8546.58	9829.95	12589.8	9328.05	8593.3	10445.8	9984.33
TILPAAAQDVYYR	Q5XID0	Dolichyl-diphosphooligosaccharide--protein glycosyltransferase subunit 1	8038.41	6778.73	6122.21	5220.57	5881.06	7726.22	8831.9	6622.67	5376.22	5578.73	6262.83	8463.04	3128.29	5298.57	7559.67	9235.78
TVDLSSHLAK	Q5XIE0	Dolichyl-diphosphooligosaccharide--protein glycosyltransferase subunit 1	2131.82	1245.34	3782.16	3422.12	2960.82	3759.94	3284.77	3845.16	3392.55	2567.41	3348.84	5988	3847.17	3388.5	3940.57	4444.99
LAHLGVQVK	Q5XIE6	Dolichyl-diphosphooligosaccharide--protein glycosyltransferase subunit 1	1959.53	2928.82	1367.53	2285.64	2507.93	2608.16	1743.58	2318.16	2653.6	2481.27	1845.42	N/A	3353.53	2688.63	1618.02	1758.84
VTAEVVLAHPGGGSTAR	Q5XIF3	Dolichyl-diphosphooligosaccharide--protein glycosyltransferase subunit 1	4310.92	N/A	3966.68	4284.35	5227.94	4651.75	3927.6	3327.83	4553.64	4395.08	3532.85	3491.78	8928.09	4470.78	3616.75	8367.58
ASSFVLALEPELESR	Q5XIF6	Dolichyl-diphosphooligosaccharide--protein glycosyltransferase subunit 1	10925.4	16045.3	16618.8	7611.77	15110.2	21799.2	14151	19454.7	14022.2	13767.6	14579.9	23062.7	20180	15854.9	19657.8	20110.9
VACITEQVLTLVNK	Q5XIG8	Dolichyl-diphosphooligosaccharide--protein glycosyltransferase subunit 1	4259.79	4270.56	3536.93	4885.73	5220.88	4823.51	3743.02	5420.8	4327.11	2435.78	4243.95	5298.46	5871.57	4931.11	4503.62	4833.47
AVTSEIAVLQSR	Q5XIH7	Dolichyl-diphosphooligosaccharide--protein glycosyltransferase subunit 1	20478.6	21904.9	19128.8	15800.6	19775.5	20944.5	22350.1	22218.9	21357.4	17462.9	19511.9	23922.2	21866.8	17626.1	23438.8	23147.6
IDHILDAL	Q5XIK2	Dolichyl-diphosphooligosaccharide--protein glycosyltransferase subunit 1	2391.83	2910.57	3002.16	2822.94	3293.58	1437.01	3279.43	3307.26	2739.56	2851.64	3268.91	3121.04	3964.71	2926.16	3593.49	2403.42
FVDHVFDEQVIDSLTVK	Q5XIM7	Dolichyl-diphosphooligosaccharide--protein glycosyltransferase subunit 1	1981.36	5883.6	3596.08	843.868	N/A	N/A	5822.23	5061.45	3626.24	6209.78	3205.89	2062.45	1426.77	4496.8	1420.68	3240.69
LGAEVYHTLK	Q5XIM9	Gamma-enolase	36883.6	65747.3	49585.7	49726	53360.4	61963	45312.8	61435.5	42298.9	55172.7	51915.5	61863.3	60469.5	62045.8	57678.4	75032.3
IEEELGEEAR	Q5XIP6	Gamma-enolase	198974	174248	14872.6	25505.5	33372.9	66110.2	38739.8	38883.7	34056.5	33534	44939.3	48555.9	95924.7	26565.7	68739.1	30264.5
VNQIGSVTEAIQACK	Q5XIP9	Gamma-enolase	143994	135946	132986	114641	133420	160274	125419	184035	104526	134114	169876	166556	166889	135088	210353	160067
DGKYDLDFK	Q5XIT1	Gamma-enolase	11992.8	15672.5	13077	11471	16190.9	13975.3	12126	20256.9	12350.6	13331.5	18206	19287.2	17668.4	16095.8	16756	17293.9
AVDHINSTIAPALISSGLSVVEQEK	Q5XIT9	Gamma-enolase	91013.5	148721	138724	162092	179006	195143	104686	143001	109041	134940	116705	188400	174527	170244	162479	173400
CITGDQLGALYQDFVR	Q60587	Gamma-enolase	6233.94	13056.4	7319.95	3145.07	5429.35	6036.03	5328.55	7817.73	3792.96	5868.4	7292.54	10771.3	7788.99	7481.33	10327.2	7750.18
FTANVGIQIVGDDLTVTNPK	Q62599	Gamma-enolase	5435.08	4212.88	1280.88	2070.39	N/A	1178.12	3754.75	11959.4	2565.96	1691.82	3476.33	1973.32	4469.21	3847.09	2850.89	2866.59
LAMQEFMILPVGAESFR	Q62634	Gamma-enolase	4645.52	15275.6	25834.5	38100.9	72810.3	37415.9	13288.9	14544.4	19371.1	19932.5	10229.5	19962.5	28006.5	19184.5	14019.4	17014.8
DATNVGDEGGFAPNILENSEALELVK	Q62638	Gamma-enolase	9432.31	36452.9	66604.6	78560.7	106216	155280	28162.4	26033	36828.7	65556.2	51320.4	96423.7	51741.9	57982.8	70319.9	81532.2
LDNLMLELDGTENK	Q62639	Gamma-enolase	8663.32	36793.6	24352.7	27177.1	47203.1	51848.4	9957.85	8612.86	3486.97	43160.7	5118.34	11528.5	32170.6	44049.5	15264.1	45975.6
MVIGMDVAASEFYR	Q62688	Gamma-enolase	5443.21	36060.7	20342.4	24600.1	34805.8	31560.4	11955.5	14215.6	15656.6	15338.9	6789.92	28030.5	21377.7	18360	10639.6	26140.8
GTGGVDTAAVGGVFDVSNADR	Q62698	Creatine kinase B-type	210129	422335	371994	372187	336616	520956	326752	428009	274993	266607	379634	550695	411705	404409	488063	402587
GFCLPPHCSR	Q62717	Creatine kinase B-type	58598.1	86741.2	78229.9	70308.5	50213.6	60997.1	68578	99141.4	56630.3	78946.8	94391.3	45725.6	53771.9	103042	95415.1	95482.8
LAVEALSSLDGDLSGR	Q62718	Creatine kinase B-type	153550	350718	227251	266928	161502	345625	255952	385934	179747	203382	228279	336083	337524	249413	285338	298044
LGFSEVELVQMVVDGVK	Q62725	Creatine kinase B-type	5353.98	54047.4	79328.3	88066.8	113380	48425.3	26871.4	31866.5	47309	59062.4	32852.6	55245	42950.7	38164.3	52998.7	53502.8
VLTPELYAELR	Q62733	Creatine kinase B-type	283549	1.13514e+06	461081	518139	475918	655825	852284	572712	427673	452845	449789	640270	1.15356e+06	528366	1.2014e+06	621165
FCTGLTQIETLFK	Q62745	Creatine kinase B-type	78894.3	457710	163098	144390	354574	401583	111818	320596	126355	165016	142622	437480	538433	205670	360790	409292
LEQGQPIDDLMPAQK	Q62764	Creatine kinase B-type	53523.4	103971	94956	94049.4	185837	156343	84086.6	164759	79005.3	106582	71638.2	98418.7	87783.8	100358	82913.4	83192.4
LLIEMEQR	Q62780	Creatine kinase B-type	91723.3	171050	196812	359396	430716	159619	178233	152244	150546	171977	116154	155444	128520	147457	111878	153719
DLFDPIIEDR	Q62784	Creatine kinase B-type	367162	1.11936e+06	1057582	1.16489e+06	1686393	1.84669e+06	790892	1.16967e+06	793946	953646	1.03524e+06	2160285	1.67559e+06	1.37242e+06	1.41601e+06	1.39345e+06
TDLNPDNLQGGDDLDPNYVLSSR	Q62806	Creatine kinase B-type	270587	441757	793911	899729	797338	1.5498e+06	576237	880475	547443	642694	780495	1.36612e+06	983037	786297	1.07482e+06	948505
RGTGGVDTAAVGGVFDVSNADR	Q62812	Creatine kinase B-type	85496.1	125046	77580.8	64550.4	81432	58139.5	73728.6	87605.6	59008.1	74490.6	79431.8	87446.9	78343	88320.5	69284.6	91735.2
FPAEDEFPDLSSHNNHMAK	Q62813	Creatine kinase B-type	4240.11	14690.5	16007.8	12766.9	27681.4	5731.81	18238.2	12975	9417.07	24408.9	9711.56	3204.37	7946.58	16712.2	4686.71	9138.04
AYGENIGYSEK	Q62826	Sodium/potassium-transporting ATPase subunit beta-1	71482.9	90981.8	54775.9	56149.5	63026.5	93682.6	73805	76596	59423.4	55473.6	66097.6	91600.9	80587	63008.9	90205.6	78803.3
FIWNSEK	Q62829	Sodium/potassium-transporting ATPase subunit beta-1	91982.9	51812.2	22233.7	11931.1	11083.7	40376.7	61008.7	48816.5	37212.4	25278.7	59851.2	53986.9	39313.2	47332.5	60471.5	60577.1
EGKPCIIIK	Q62839	Sodium/potassium-transporting ATPase subunit beta-1	6486.2	6763.64	6608.75	6355.69	7325.69	6704	6779.77	7659.9	6846.19	5457.57	6603.7	7949.93	7432.03	7755.99	8307.46	9816.21
VAPPGLTQIPQIQK	Q62847	Sodium/potassium-transporting ATPase subunit beta-1	81516	82506.7	76579.4	88278.4	94285.6	91837.4	71980.4	101795	66255.1	87894	75542	83669.4	93816.2	69531.2	87186.8	73248.1
YNPNVLPVQCTGK	Q62865	Sodium/potassium-transporting ATPase subunit beta-1	248170	184195	88851.7	81206.8	90321.5	92789.1	196339	194860	76485.5	156864	190550	200834	176222	175660	208840	204403
SYEAYVLNIIR	Q62871	Sodium/potassium-transporting ATPase subunit beta-1	57138.1	83339.1	52046.3	39401.1	75253.2	44200.7	55982.3	68464.5	56006.3	56108.3	58198.1	87634.1	107136	77872	82732.5	77688.2
DDMIFEDCGSMPSEPK	Q62876	Sodium/potassium-transporting ATPase subunit beta-1	1495.83	20577	12532.4	15373.5	20831.1	10996	15634.6	9942.31	12199.8	14096.7	6259.89	10894.2	9247.43	15640.6	5704.27	9901.79
DSAQKDDMIFEDCGSMPSEPK	Q62885	Sodium/potassium-transporting ATPase subunit beta-1	N/A	5452.87	5048.32	4469.37	10842.8	2636.53	4380.44	2417.84	4583.45	4244.33	1371.04	1857.42	1482.23	6274.65	1152.58	1981.22
SLGVGFATR	Q62888	Fatty acid-binding protein, heart	8310.85	10031.4	7887.94	8981.02	8530.27	9023.22	7669.79	9365.53	8262.1	8198.3	8649.68	8892.63	11939.5	9141.05	9699.86	10783
DGVANVSIEDR	Q62889	Superoxide dismutase [Cu-Zn]	20596.2	23834.5	26177.8	26426.4	24657.8	28152.4	22606.7	33167.9	19372.5	22066	27767.3	32982.8	32584.6	20444.5	34114.5	25283
HVGDLGNVAAGK	Q62902	Superoxide dismutase [Cu-Zn]	2638.28	2166.92	1455.47	2294.37	2214.84	2636.45	2299.75	3764.29	2059.91	1864.68	2735.18	3194.68	2675.31	2138.3	4169.18	2818.84
VISLSGEHSIIGR	Q62910	Superoxide dismutase [Cu-Zn]	4927.26	11910.5	6922.3	8514.8	8606.76	6772.22	5689.1	9299.85	5729.21	7817.83	7859.11	6932.48	10373	7502.28	8633.9	7559.19
GDGPVQGVIHFEQK	Q62915	Superoxide dismutase [Cu-Zn]	2061.22	4819.93	5183.36	5750.31	6122.42	4721.49	4406.69	5162.04	3266.83	4571.84	6691.63	4815.85	5203.16	4122.13	7095.98	4955.14
SVTNEDVTQEQLGGAK	Q62927	Propionyl-CoA carboxylase beta chain, mitochondrial	1275.93	887.609	966.578	832.14	1212.61	N/A	1361.78	898.788	451.487	1145.4	N/A	1799.09	948.672	1342.82	1475.51	759.644
EPLGFVK	Q62940	Synaptophysin	123891	123878	113789	125534	138938	135518	143939	135515	128593	122043	106000	144326	144376	134508	151541	142341
MATDPENIIK	Q62950	Synaptophysin	79125.9	103551	218266	214888	257226	86642.4	106225	93686	110311	97709.2	71110.7	91583.4	89196.9	107791	92536.1	83230.7
LHQVYFDAPSCVK	Q62951	Synaptophysin	122254	138225	105976	106528	116262	112356	116221	109683	103856	118994	110423	104335	119927	115523	123545	133736
MDVVNQLVAGGQFR	Q62952	Synaptophysin	7993.16	74902.9	47066.9	71550.8	166675	126673	33029.1	24919.2	44972.7	48872.2	43304.5	66408.8	73157.7	65262	47046.4	61495.4
GELLEAIK	Q62967	Superoxide dismutase [Mn], mitochondrial	25421.7	21844.6	18410	18069.8	18975.3	20594.4	20942.3	20994.4	17159.2	18193.8	17561.7	22031.9	21653.6	20153.7	22183	21303
GDVTTQVALQPALK	Q62991	Superoxide dismutase [Mn], mitochondrial	24580.1	26525.4	17806.2	17940.6	19138.4	20413.2	20590.6	20631.6	16161.6	15746.9	17756.8	21602.2	19368.1	20425.4	23424.1	26345.3
SPPGQVTEAVK	Q63009	Aldo-keto reductase family 1 member B1	36616.9	49775.6	20598.9	14332.5	18790.3	21991.2	26229.6	28407	15082.5	21451.8	26041.8	33349.7	27525.2	13565.7	24865.2	33153.1
RQDLFIVSK	Q63016	Aldo-keto reductase family 1 member B1	9082.49	15378.6	13702.3	5753.3	14269.5	4925.22	11262.1	12152.7	7416.58	9766.89	11924.1	10346.7	7106.38	10060.1	7343.08	15294.1
NLVVIPK	Q63028	Aldo-keto reductase family 1 member B1	19046.9	26701	25822.6	13536.6	24533.9	16381.8	25726.7	24672.1	12945.1	19722.8	21752.6	25067.6	27740.3	17230.6	18610.5	33201.3
AIGVSNFNPLQIER	Q63041	Aldo-keto reductase family 1 member B1	47819.4	137511	60900.2	69245.6	138867	104094	45403.6	98356.3	32710.4	40687.5	82701.6	134823	83218.5	90927.3	75686.6	147454
DYPFHAEV	Q63065	Aldo-keto reductase family 1 member B1	14727.3	14336.9	15748.1	10203.6	13739.3	11998.4	17882.8	15519.1	8139.05	12447.6	12963.3	18680.7	11149.2	10105.3	10857.8	17852.9
QDLFIVSK	Q63081	Aldo-keto reductase family 1 member B1	4304.71	5311.57	6745.07	2755.77	6136.66	N/A	6656.14	6307.48	2780.97	4503.74	5927.85	7575.72	4548.53	4159.11	3698	7047.32
LCYNPDFEK	Q63092	Glutathione S-transferase Mu 7	18271.3	21973.8	13869.8	13488	13606.6	15813.7	17315.4	16052.3	11831.2	11994.7	14488.5	16769.8	14276.4	13572.2	14853.9	16116.9
NQVFEATCLDAFPNLK	Q63100	Glutathione S-transferase Mu 7	4194.72	11631.1	4322.08	4144.62	8963.75	9990.06	8492.54	10992.5	3271.34	3389.75	4855.73	11503.1	9519.21	8334.34	12787	10510.5
SVLISLK	Q63151	Clathrin light chain A	3219.54	1645.48	1317.52	3223.38	1679.83	2354.07	1228.25	2423.47	1116.87	2382.71	1885.07	1211.44	3781.92	2364.2	2473.81	1404.72
FTDEYQLYEDIGK	Q63198	Calcium/calmodulin-dependent protein kinase type II subunit beta	4283.03	2907.9	1776.78	1603.31	1475.73	3261.32	3048.95	3127.24	1531.47	1995.87	2336.09	2587.19	2139.08	2572.84	1981.21	1802.8
GIDLTQVK	Q63270	Dihydrolipoyllysine-residue acetyltransferase component of pyruvate dehydrogenase complex, mitochondrial	39299	38257	34620.9	39630.7	38879.5	41560.1	40456.8	46184.3	38161.8	39371.3	38301.3	42902.3	45157.5	43390.6	52129.9	44050.1
DIDSFVPTK	Q63347	Dihydrolipoyllysine-residue acetyltransferase component of pyruvate dehydrogenase complex, mitochondrial	42530	34786.9	31490	35180.5	35086.6	41269.4	43441	34044.6	35833.3	32545.4	28906	42683.4	42394.4	32747.2	35808.5	33371.4
ISVNDFIIK	Q63362	Dihydrolipoyllysine-residue acetyltransferase component of pyruvate dehydrogenase complex, mitochondrial	9778.44	13043.1	10615.2	14589.9	15730.5	18910.3	12511	13863	13511.5	10172.7	10163.4	17398.1	17145	15119.4	15383.5	14405.5
AAPAAAAAAPPGPR	Q63377	Dihydrolipoyllysine-residue acetyltransferase component of pyruvate dehydrogenase complex, mitochondrial	18011.2	15047.7	20226.3	22240.3	16507.2	22714.3	22748.8	23144.7	18074.6	16596.3	18934.5	28431.4	23910	19648.2	28221	20570.7
VAPTPAGVFIDIPISNIR	Q63396	Dihydrolipoyllysine-residue acetyltransferase component of pyruvate dehydrogenase complex, mitochondrial	4981.65	12563.1	10121.4	19067.2	29609.7	23988.8	6152.42	7240.27	11755.4	16419.8	7482.36	12376.8	19588.4	13222.8	13080.1	10649.9
GLETIASDVVSLASK	Q63398	Dihydrolipoyllysine-residue acetyltransferase component of pyruvate dehydrogenase complex, mitochondrial	18863.3	72217.7	28428.5	36068.8	41146.2	48790.7	33890	32444.3	32326.1	28507.9	26994.5	58434.3	46520.4	37591.1	80357.4	39677.8
VFVSPLAK	Q63413	Dihydrolipoyllysine-residue acetyltransferase component of pyruvate dehydrogenase complex, mitochondrial	36259.6	45020.3	42137.4	46751.3	47995.8	51090.9	49215.8	46887.1	47560.4	44913.7	39231.2	52935.4	53423	40201.1	54456	49301.6
DVPLGTPLCIIVEK	Q63433	Dihydrolipoyllysine-residue acetyltransferase component of pyruvate dehydrogenase complex, mitochondrial	10788.7	24105.7	31071.4	39759.7	71785	56799.4	20866.9	18358.4	21134.1	35035.9	25543.4	41440.9	46123.6	29305.3	34239	34229.2
DVPVGSIICITVEKPQDIEAFK	Q63450	Dihydrolipoyllysine-residue acetyltransferase component of pyruvate dehydrogenase complex, mitochondrial	4991.29	4644.02	3711.33	2439.03	N/A	N/A	5601.7	4641.33	2272.58	4218.3	3052.4	3326.47	1665.31	3667.9	4136.39	5837.33
VPLPSLSPTMQAGTIAR	Q63468	Dihydrolipoyllysine-residue acetyltransferase component of pyruvate dehydrogenase complex, mitochondrial	1318.3	5424.91	3667.56	5998.91	8436.17	N/A	2927.85	2731.68	5827.51	4483.17	1408.95	N/A	2881.26	4086.34	1188.8	N/A
GITFEDVR	Q63470	Medium-chain specific acyl-CoA dehydrogenase, mitochondrial	13031.5	13081.8	10814.3	11222.9	12561.9	12005.7	13637.5	14844.1	13112.5	11851.9	13165.1	14546	13646.4	13261.6	14627.7	13184.7
ENVLIGEGAGFK	Q63505	Medium-chain specific acyl-CoA dehydrogenase, mitochondrial	10638.1	14985.9	10252.4	11129.5	11607	12038.1	14085	11816	10430	9017.34	10409.9	15184.9	10974.5	11053	14796.4	12671.8
NTYFASIAK	Q63507	Medium-chain specific acyl-CoA dehydrogenase, mitochondrial	7357.7	6115.39	6160.68	5817.14	6854.13	4847.42	7450	6063.12	5681.29	6295.66	6592.54	6560.4	5831.98	6125.21	5855.62	7112.11
SGEYPFPLIK	Q63525	Medium-chain specific acyl-CoA dehydrogenase, mitochondrial	5895.81	6890.53	8649.1	9296.58	10724.4	9830.15	10170.6	9802.06	9525.99	8299.26	9138.34	11103.7	10939.4	9755.16	9792.32	11310.4
IYQIYEGTAQIQR	Q63537	Medium-chain specific acyl-CoA dehydrogenase, mitochondrial	8095.08	6384.63	4637.2	3211.51	5779.64	3737.07	5865.5	7311.63	4238.38	4900.26	6118.63	4955.98	4784.03	5564.91	5329.18	4412.45
EEIIPVAPDYDK	Q63560	Medium-chain specific acyl-CoA dehydrogenase, mitochondrial	13633	13886	12443.5	12054	15750.4	18685.8	16065.7	16246.8	12712.1	11453.3	13641.9	19028.4	16973.2	13012.9	16858.1	14437.8
TRPTVAAGAVGLAQR	Q63564	Medium-chain specific acyl-CoA dehydrogenase, mitochondrial	5437.52	8014.14	6265.82	6771.49	8101.75	7177.68	5891.11	6261.43	7215.03	6936.55	5842.13	4468.9	6503.11	7550.47	5069.79	7382.91
GQVYILGR	Q63569	Argininosuccinate synthase	34006.4	51664.8	61967.4	33415.7	60818.4	35910.1	53244.9	56257.8	31272.3	51167.3	47869.7	63912.8	53329.3	42741.7	40279.8	75744.8
VQVSVFK	Q63570	Argininosuccinate synthase	11840.4	18385.7	21082.4	10995.3	22829.1	10595	20179	15307.3	9691.72	14609	13223.6	13079.4	11098.8	10415.8	6331.26	21325.2
KVFIEDVSK	Q63584	Argininosuccinate synthase	2360.07	3116.74	4008.74	1998.85	3950.9	2115.53	3275.32	3795.54	1887.7	2784.16	3284.41	4710.61	2754.9	2690.11	1993.25	4010.03
QHGIPIPVTPK	Q63598	Argininosuccinate synthase	7331.51	5758.95	11640.6	3549.06	9803.49	N/A	8878.33	8916.08	2941.93	8983.41	7402.98	6428.52	3091.11	4238.23	5700.99	9888.43
EQGYDVIAYLANIGQK	Q63617	Argininosuccinate synthase	451.006	2658.32	3042.44	350.7	3467.44	N/A	1406.57	1757.13	N/A	3865.43	2148.08	2860.98	N/A	1302.2	2368.44	2954.08
APNTPDVLEIEFK	Q63622	Argininosuccinate synthase	13372.3	20054.7	34736.9	16242	25098.9	21038.9	28721.7	32631.5	12577.6	16774.3	23067.9	43710	15779.7	14583	17526.7	40753.5
FELTCYSLAPQIK	Q63633	Argininosuccinate synthase	1257.02	3093.53	4841.54	1127.18	3852.16	N/A	1421.54	2658.53	N/A	2081.47	3282.68	3260.82	1867.91	1497.66	N/A	3511.7
DNAGAATEEFIK	Q63651	Fructose-bisphosphate aldolase C	390542	411433	358551	324706	356218	398067	360279	414590	355485	301169	381595	425101	398906	355972	411538	415681
QVLFSADDR	Q63692	Fructose-bisphosphate aldolase C	358901	389763	346440	308622	346786	386318	376086	416941	322711	302808	370987	424237	429618	377441	475986	443645
DDNGVPFVR	Q63716	Fructose-bisphosphate aldolase C	193184	202851	173030	149989	178421	174385	173830	175942	139082	157193	177946	214423	183632	193725	177654	185388
LSQIGVENTEENR	Q63754	Fructose-bisphosphate aldolase C	117756	88016.9	88923.9	77475.7	83343.4	91791.8	91262.3	95943.5	75117.3	67600.9	84649.5	102096	72443.3	83817.7	113714	107598
PHSYPALSAEQK	Q63941	Fructose-bisphosphate aldolase C	28181.3	34936.9	26107.3	25279.2	30640	39143	31895.4	32752.3	26666.2	20363.2	24003.8	26810	28886.5	30191.7	31471.4	35725.6
KELSDIALR	Q63945	Fructose-bisphosphate aldolase C	5769.42	6204.62	6055.94	6092.7	5046.96	5492.21	5431.36	6566.29	5075.66	4546.93	7129.86	6284.7	6469.67	6952.41	5567.74	5296.63
GILVGIK	Q63965	Fructose-bisphosphate aldolase C	105715	153611	111646	130005	163526	137442	140148	138262	137622	127487	107032	101971	171087	145504	129529	161835
YSPEEIAMATVTALR	Q64057	Fructose-bisphosphate aldolase C	12684.1	30514.5	30699.1	35689.5	58683.8	43438.5	23874.3	24867.4	23771.8	24185.6	20307.5	32494.2	28528.3	28112.1	29521.5	33556
LSQIGVENTEENRR	Q64060	Fructose-bisphosphate aldolase C	14172.3	10639.1	12391.8	13164	13546.8	9136.41	10292.1	6063.32	14232.4	11343	11779.5	7230	8168.2	11163.3	8901.32	9004.54
YEGSGDGGAAAQSLYVANHAY	Q641W2	Fructose-bisphosphate aldolase C	20029.5	32389	9941.22	11721	15921	20240.8	14681.2	18130.8	13312.7	11947.7	14054.7	16666.6	19450.5	18415	17662.2	15789.8
RLSQIGVENTEENR	Q641X8	Fructose-bisphosphate aldolase C	1666.95	1665.48	1049.67	1300.52	1425.7	2221.32	364.303	1666.4	692.479	1502.31	1081.33	1026.66	1320.16	968.369	238.469	658.185
TVPPAVPGVTFLSGGQSEEEASLNLNAINR	Q641Y0	Fructose-bisphosphate aldolase C	10522.2	16307.6	6554.84	8549.54	6910.83	18101.1	11308.7	12511.7	6630.87	4792.72	7566.72	7211.27	10565.1	8005.5	9567.67	7803.31
GVVPLAGTDGETTTQGLDGLLER	Q641Y2	Fructose-bisphosphate aldolase C	62228.6	167140	198677	222140	252632	598813	145601	233373	151193	258889	259865	473130	417899	327021	176954	180735
TPSALAILENANVLAR	Q641Y5	Fructose-bisphosphate aldolase C	52301.3	207148	163043	178544	320977	220765	93017	119437	131286	143091	92424.1	192957	229240	151117	143098	161113
GILAADESVGSMAK	Q641Y8	Fructose-bisphosphate aldolase C	89892.2	203855	125796	118050	217148	168164	173368	157208	117731	97691.5	128961	169184	150755	111163	148417	171300
ELSDIALR	Q641Z6	Fructose-bisphosphate aldolase C	495401	576540	435088	421081	471210	546601	516264	558045	462035	403268	446814	566326	535839	530616	497999	605581
ALQASALSAWR	Q64232	Fructose-bisphosphate aldolase C	84976.8	37088.7	12828	4929.52	4924.08	22205.4	35576.6	25573.4	22753.9	10137.9	31430.1	19011	22320.1	23670.7	24408.4	31159.5
DNAGAATEEFIKR	Q642G4	Fructose-bisphosphate aldolase C	906.289	864.879	2516.88	1196.98	3451	N/A	N/A	1178.49	2683.16	2321.74	1727.52	1007.37	1767.36	1754.1	N/A	1963.58
VLADLGVTPDK	Q64303	Protein kinase C epsilon type	1427.27	3001.11	4667.97	7021.3	5443.78	4170.25	4083.17	N/A	8808.35	4479.84	3454.72	5897.8	N/A	N/A	5797.37	5039.59
SENEEFVEVGR	Q64428	cAMP-dependent protein kinase type I-alpha regulatory subunit	7572.59	7528.41	9467.04	10575.4	12942.9	8992.17	9688.22	9913.55	7353.56	10538.2	6657.62	10838.2	8765.2	8250.37	9225.38	9140.02
VLGPCSDILK	Q64542	cAMP-dependent protein kinase type I-alpha regulatory subunit	6295.73	N/A	8074.49	8413.88	7191.27	8752.1	N/A	8598.89	6323.24	7636.62	8057.98	9618.25	7195.19	7580.43	8640.44	10410.7
LTVADALEPVQFEDGQK	Q64548	cAMP-dependent protein kinase type I-alpha regulatory subunit	3426.82	5125.02	5312.66	2899.78	5995.44	5163.66	4065.13	4326.51	3215.84	2352.51	3945.77	7262	5622.46	3449.06	5448.27	5007.01
VIILGDSGVGK	Q64559	Ras-related protein Rab-7a	35509.7	66019.7	53211	54913.7	60571.5	43111	56061	47341.7	48684.5	52550	46147.8	54188.4	55846.8	55495.4	53071	59153.5
NNIPYFETSAK	Q64560	Ras-related protein Rab-7a	29920.1	25742.3	23723.3	22680.9	23549.7	25893.7	25395.5	26459.3	21038.7	19096.8	25522.1	29025.8	26260.2	23132.5	29490	29338.7
ATIGADFLTK	Q64568	Ras-related protein Rab-7a	19404.3	22843.4	23776.9	24859.6	23505	24465.6	23120.8	22046.6	22522.3	19212.1	23289.5	24643.9	22557	22566.6	26053.1	29234.1
GADCCVLVFDVTAPNTFK	Q64591	Ras-related protein Rab-7a	3042.64	4535.16	3629.84	3716.05	3686.36	5846.19	3834.82	3638.44	2618.77	2892.45	3012.43	4888.34	3694.1	3620.1	3944.82	4430.33
EAINVEQAFQTIAR	Q64602	Ras-related protein Rab-7a	4562.87	9310.58	8516.23	8317.1	8084.86	16295.7	7270.06	7869.12	5909.18	5752.01	8160.31	11319	15162.8	8889.71	9683.44	10278.6
QETEVELYNEFPEPIK	Q64604	Ras-related protein Rab-7a	910.022	1289.26	1660.84	1839.81	910.458	1257.12	1002.13	758.115	1168.1	1235.35	1304.67	1235.26	815.034	1091.84	1283.68	1103.68
DPENFPFVVLGNK	Q64611	Ras-related protein Rab-7a	21677.2	42851.1	44248.9	57186.7	70223.8	74497.3	33715	35448.2	37431.4	36989.7	33085.2	64156.7	59702.3	49418.8	47137.2	47773.6
DEFLIQASPR	Q64640	Ras-related protein Rab-7a	16104.4	20296	14814.8	15796	13982.5	17777.7	18514.5	17761.5	12248.9	13268.5	16819.5	22850.1	16225.7	15873.7	23737.6	22703.3
FQSLGVAFYR	Q66H15	Ras-related protein Rab-7a	2791.33	12460.7	4484.96	4303.8	6405.74	2808.48	4231.05	3773.46	4999.86	6646.64	3306.93	3228.49	5984.23	6521.01	2384.72	4120.14
ACLYAGIK	Q66H20	Glutamine synthetase	340291	433171	315868	385588	406100	453850	408091	354933	415006	396035	335436	335347	435272	464204	346360	437624
TCLLNETGDEPFQYK	Q66H61	Glutamine synthetase	395823	528373	422134	475161	426491	696654	536668	548253	412476	409243	521694	644439	564351	492761	700952	637466
LTGFHETSNINDFSAGVANR	Q66H80	Glutamine synthetase	622731	836951	507852	480799	508597	567433	573584	588812	482131	493654	528146	621033	474369	571107	639904	656449
TCLLNETGDEPFQYKN	Q66HA4	Glutamine synthetase	13829	54231.6	14848.7	9895.1	18997.3	23081.1	14770.8	37920.2	11238.6	13118	17840.4	18235	15585.1	19584.4	14401.4	19182
RPSANCDPYAVTEAIVR	Q66HA6	Glutamine synthetase	962036	1.10545e+06	784534	455516	920392	725698	1.03776e+06	992131	472880	567767	934123	905810	873386	977201	1.04389e+06	1.09493e+06
LVFCEVFK	Q66HA8	Glutamine synthetase	263152	841055	782168	728163	768794	699693	856770	875511	610813	404198	744076	909477	786942	838668	941049	1050777
MGDHLWVAR	Q66HC5	Glutamine synthetase	34381.3	16953.3	10953.4	3697	4488.63	8631.75	27396.1	19632.6	18317	9642.14	18873.7	16568	10417.6	12758.9	15356.1	21947.2
QMYMNLPQGEK	Q66HD0	Glutamine synthetase	10983.5	8682.74	5909.49	4551.39	1393.83	10011.6	6198.17	4972.31	4707.86	7029.45	6910.42	11857.8	4897.6	7686.53	19108.6	8270.86
ITGTNAEVMPAQWEFQIGPCEGIR	Q66HF1	Glutamine synthetase	89843	77622.2	28263.8	11299.7	22567.1	48661.7	84363.2	40028.7	50869.5	22275.6	61557.9	73710.5	35497.1	58129.7	57935.3	63127.4
IFVDIEK	Q66HG4	Glycogen phosphorylase, liver form	4491.23	4826.53	5208.48	4775.95	5709.63	5383.55	6612.29	5107.16	6199.39	5882.57	5341.55	5547.96	4338.9	4490.78	4873.88	6289.34
GIVGVENVAELK	Q66HG5	Glycogen phosphorylase, liver form	4110.82	4228.2	4566.11	4898.12	4851.08	5413.92	5649.03	5265.63	4863.83	5234.6	3121.86	5578.52	3952.1	4190.25	3699.05	5055.92
IVALFPK	Q66HG8	Glycogen phosphorylase, liver form	2750.54	2187.11	3954.8	3615.48	3799.4	3296.25	4354.54	2979.4	4097.84	3805.46	2020.11	N/A	2960.61	3395.8	1907.29	3551.06
EYYEALPELK	Q66HR0	Glycogen phosphorylase, liver form	2584.82	1062.01	2153.87	1726.69	2880.32	2529.23	2345.32	2313.49	2127.57	2319.49	2274.89	2023.59	N/A	2049.27	N/A	2186.57
VAAAFPGDVDR	Q66X93	Glycogen phosphorylase, muscle form	7332.06	8160.25	6828.47	4216.3	7612.05	6626.68	6288.49	6660.91	5272.33	7367.91	6603.19	9829.25	5008.06	6366.12	4842.72	7359.1
GAVDGGLSIPHSTK	Q68A21	60S ribosomal protein L5	13280.4	15531.6	15654.2	16410.4	14007	16335.3	15885.9	14849.2	17042.5	11986.5	16323	16952.8	14833	16198.1	16578.6	19796
VGLTNYAAAYCTGLLLAR	Q68FP1	60S ribosomal protein L5	461.379	1839.58	840.608	642.351	1283.03	1001.95	599.364	659.754	927.991	1271.6	703.994	N/A	1289.53	1740.26	623.367	966.554
TYATAEPFIDAK	Q68FQ0	Synapsin-1	29938.9	20701.9	21625.3	25947.9	26287.6	38747.1	30816.1	27298.6	20545.3	19591.1	25616.4	34490.8	33963.9	24768.1	39108	26013.2
IHGEIDIK	Q68FR6	Synapsin-1	2587.29	2400.33	2668.83	2628.05	2260.58	2625.98	1823.72	N/A	1910.59	2059.19	1855.03	1941.95	2990.31	2602.93	3334.58	2934.93
SLKPDFVLIR	Q68FR9	Synapsin-1	8341.66	9564.17	8088.93	13811.9	11315.3	13514.4	13299.1	14183.3	14296	9133.43	12903.4	15138.7	24409.1	12018.9	10879.8	10013.9
QTTAAAAATFSEQVGGGSGGAGR	Q68FS2	Synapsin-1	1076.44	N/A	1284.35	1766.09	1521.71	2199.3	1850.69	657.356	997.758	1447	N/A	843.786	1668.6	852.018	2117.36	911.638
LGTEEFPLIDQTFYPNHK	Q68FS4	Synapsin-1	3670.02	2513.64	2337.2	2107.8	2861.04	N/A	1849.52	2516.11	2011.7	2490.77	2566.81	2228.98	3036.77	N/A	3176.73	3192.32
GSHSQTPSPGALPLGR	Q68FT9	Synapsin-1	40412.5	40128.1	36321.8	39046.4	22596.9	43410	36761.2	39433.2	31634.3	37206	32914.2	30957.3	41428.1	18422.3	45628.3	38934.4
VDNQHDFQDIASVVALTK	Q68FU3	Synapsin-1	14281.9	19870	22441.4	21530.3	21751.9	31139	21584.4	19416	19088.7	15469.8	15588	29284.5	27618.1	18997	27262.4	21579.9
EMLSSTTYPVVVK	Q68FU7	Synapsin-1	1588.43	6780.77	10281.5	10661.6	12759.7	13718.3	11451.5	8116.4	9058.5	8787.9	3100.88	8360.78	10468	6966.66	6187.67	5274.03
GDEELDSLIK	Q68FX0	Histone H2A.Z	4930.02	9290.25	7735.21	6102.86	7277.47	13122.9	6535.11	6833.39	4492.94	4363.29	8682.7	8797.56	6568.3	5756.77	5968.73	16801.6
AQATPSQPLQSSQPK	Q68FX1	AP2-associated protein kinase 1	1887	702.241	1344.27	2129.07	1304.86	2168.63	1983.52	777.434	623.843	1775.54	648.392	1044.08	2537.43	1050.17	3233.14	2016.07
ATVQPLPQATGPSNQPSLLASVSQPK	Q68FX9	AP2-associated protein kinase 1	2864.45	3426.13	2803.86	6527.31	5111.43	6025.74	3309.73	2644.71	3312.55	2993.8	2368.77	2165.69	4586.48	3268.09	4322.32	3217.15
VENILLHDR	Q68FY0	AP2-associated protein kinase 1	2673.83	2849.97	3007.87	3633.79	3725.56	3516.06	3117.03	3021.17	2630.86	3453.49	2407.62	2773.01	2953.46	3654.07	3505.86	2888.58
LTAEELLNK	Q69BT7	AP2-associated protein kinase 1	4769.9	5805.13	7312.59	13005.3	8597.67	10872.2	14239.6	5905.72	4089.19	10707.1	3885.16	6659.04	13340.9	8048.52	15536.8	7964.41
EQGSSGLGSGSSGGGGSSSGLGSGYIGR	Q6AXM5	AP2-associated protein kinase 1	2048.2	1109.91	1911.45	2022.6	2015.05	2277.96	2185.03	950.445	1290.68	1592.66	1582.61	1600.79	1864.4	1412.64	2172.91	N/A
ADAAVESLIPGLEPPVAQR	Q6AXM8	AP2-associated protein kinase 1	829.944	N/A	818.486	4424.04	2245.39	3036.11	2230.95	N/A	N/A	2391.21	266.584	607.02	4560.68	912.349	4425.33	N/A
LTDPIPTTETSIAPR	Q6AXQ0	AP2-associated protein kinase 1	7939.75	15141.2	16780.1	19634	19160.1	25037.2	22844.3	18206.1	14627.4	18047.1	14803.6	22633	26241.4	19936.5	25638.7	18824.5
ECPVPNVQNSPIPTK	Q6AXQ5	AP2-associated protein kinase 1	6386.4	5416.29	3966.46	4658.29	4640.82	5983.68	4718.4	3798.15	2823.17	3812.34	5249.35	5555.96	4863.7	3567.56	7899.83	4743.3
FQNPQAEGVNAVEDEIKK	Q6AXS3	AP2-associated protein kinase 1	1110.25	973.796	1997.65	1894.09	1642.31	1788.98	1140.08	1365.19	1011.75	1999.21	1300.73	1091.84	1128.67	1215.67	1747.53	1673.27
GHYVLCDFGSATNK	Q6AXS4	AP2-associated protein kinase 1	5655.08	2906.46	2520.74	3944.76	3540.99	2735.03	3014.12	3158.95	2466.52	4031.44	2680.09	2123.67	3579.19	3116.95	4407.38	3663.97
VAEDEFDPIPVLITK	Q6AXS5	AP2-associated protein kinase 1	1058.18	1663.22	3521.67	12041.6	9009.12	14319.8	4853.16	1870.88	N/A	5292.98	1703.31	5133.38	10073.1	3717.47	12003.4	3451.76
AGQTQPNPGILPIQPALTPR	Q6AXT5	AP2-associated protein kinase 1	4184.98	1903.76	6608.49	9028.72	9105	10721.5	6675.09	4426.66	6044.3	6076.42	3992.96	7240.01	8813.48	6409.09	8860.63	6578.61
TQTVLSELK	Q6AXV4	Sarcolemmal membrane-associated protein	16230.6	14810.3	16428	14960.5	16019.9	15406.3	13994	19817	12001.9	14175.1	16334	15576	17413.7	17873.5	18572.3	16614.9
ELVEAQELAR	Q6AXX6	Sarcolemmal membrane-associated protein	14038.1	10319.7	11408	10450.5	10402.8	10868.4	11604.3	10604.9	7236.24	10654.5	10248.6	12089.5	10280	9766.75	14433.8	10024.7
ENVLLSSELQR	Q6AY09	Sarcolemmal membrane-associated protein	28757.9	56371.2	53075.1	43684.1	53805.3	54667.2	52837.8	62235.3	38264.4	44056.2	52031.6	53446.5	49735.5	55375.6	58754.4	57691.9
SLQSTFQLR	Q6AY20	Sarcolemmal membrane-associated protein	8805.98	11783.7	8948.72	7476.05	8779.06	9003.59	9754.21	9699.22	7020.39	8799.03	8511.3	6465.05	9379.43	8728.71	8777.75	8961.57
LLSAQDEILLLHQAAAK	Q6AY30	Sarcolemmal membrane-associated protein	2002.15	N/A	3025.94	2452.01	2497.89	N/A	1554.17	1919.44	975.79	2221.92	1707.07	N/A	1683.59	1761.06	2271.24	1242.42
AIEAAVLAR	Q6AY41	Delta-1-pyrroline-5-carboxylate dehydrogenase, mitochondrial	10873.9	10329.1	9516.59	10219.2	10616.4	9343.5	10399.6	12431	9556.13	10842.6	9343.9	12935.9	9581.54	10885.5	9148.33	10976.5
STGSVVGQQPFGGAR	Q6AY63	Delta-1-pyrroline-5-carboxylate dehydrogenase, mitochondrial	5697.24	3404.5	3906.76	3758.8	3647.22	3337.26	4182.65	4142.48	3379.54	3361.1	4412.28	4509.44	2956.92	4281.98	3433.83	3513.87
VANEPILAFTQGSPER	Q6AY84	Delta-1-pyrroline-5-carboxylate dehydrogenase, mitochondrial	2624.19	2796.96	2236.03	2301.72	2890.33	2187.91	2948.33	3871	2055.99	2614.32	2449.16	N/A	1501.32	3828.08	2147.61	2282.52
SLGIVPLPLQR	Q6AY96	Microtubule-associated protein 1S	2361.32	8022.52	6209.59	7288.47	9845.06	11814.2	4311.02	6060.62	7026.18	5711.29	4935.79	7062.51	9580.52	8353.66	6260.61	6332.02
RPVVTTQDLEVPSR	Q6AYD3	Microtubule-associated protein 1S	9821.01	9500.66	8242.91	9246.27	10475.4	9926.93	8893.37	9187.69	7535.71	10070.6	9091.13	8718.69	10362.8	9733.4	10322.5	10499.4
LLSPALGVVFLNAR	Q6AYG3	Microtubule-associated protein 1S	401.716	1722.82	1028.23	2012.03	4007.52	869.027	547.335	398.076	2337.01	1677.56	396.262	472.841	3164.15	1538.58	515.925	441.238
GETLETLVLLNPSDK	Q6AYH5	Microtubule-associated protein 1S	1678.38	962.39	1275.42	1821.66	1075.07	2201.71	1564.84	1368.2	1634.87	1420.42	1355.11	N/A	1309.83	1034.41	1820.32	1134.43
VELVAATR	Q6AYK6	Protein tweety homolog 1	10073.9	15141	4920.49	5862.16	7372.92	8523.22	8308.07	7209.32	6480.72	7988.53	6590.43	7293.78	10593.4	7412.21	8348.99	7562.02
TELTTLEEVLSER	Q6AYK8	Protein tweety homolog 1	1890.59	6554.39	2820.75	2528.08	5078.7	4470.83	3183.34	3216.64	2468.73	4177.41	2584.68	6488.02	5219.26	2815.65	6316.37	5648.17
ALASIHSQLQGLER	Q6AYL5	Protein tweety homolog 1	4091.36	7665.97	4431.24	5838.96	7775.06	N/A	5421.78	5772.55	4849.09	7831.62	4188.87	N/A	5080.45	5404.42	4859.3	5807.14
KPLDDTLALAPLFGPPLESAFDEQK	Q6AYN4	SH3-containing GRB2-like protein 3-interacting protein 1	993.735	2888.16	3491.77	6025.45	5722.39	2137.22	2792.1	1722.69	2432.72	4228.21	2846.84	2662.27	3810.46	3012.12	4484.41	2899.64
ASIGNIALSPSPVR	Q6AYP5	SH3-containing GRB2-like protein 3-interacting protein 1	4817.21	5750.8	5339.32	9518	6856.82	8080.72	8718.31	5668.23	4480.29	7248.62	4789.65	6385.6	9168.31	6671.85	11451	5562.88
ITFFEDR	Q6AYQ4	Gamma-crystallin B	76391.4	130837	253369	3039.94	56114.9	399018	996117	120024	114498	122923	30637	112761	18179.4	17180.5	23772.1	406698
FEDENFILK	Q6AYS7	Peptidyl-prolyl cis-trans isomerase A	108346	137668	118302	104846	108390	115024	114709	139554	86095.8	84529.7	127626	152114	115696	121346	144769	142216
VCFELFADK	Q6AYT3	Peptidyl-prolyl cis-trans isomerase A	70408.7	111407	101238	74195	87127	81740	107197	109227	65864.2	80573.9	98600.5	111329	100631	100781	126979	145265
KITISDCGQL	Q6AYT5	Peptidyl-prolyl cis-trans isomerase A	49049.5	58266.9	49856.1	45023.9	44308.6	43704.2	45232.6	52157.4	35665.5	41999.1	47876.6	47050.8	46076.9	51234.1	46957.6	55169.9
VNPTVFFDITADGEPLGR	Q6AYT7	Peptidyl-prolyl cis-trans isomerase A	16520.6	33774	23664	28812.5	19662.9	29957.8	22702.6	28474.1	15408.6	17757.8	16751.9	25533.3	22152	19028.8	26129.2	27924.6
EGMSIVEAMER	Q6DGG0	Peptidyl-prolyl cis-trans isomerase A	4657.03	3636.66	4819.45	N/A	N/A	3295.1	5219.18	6573.21	1540.79	3823.2	10560.1	N/A	N/A	4666.38	4439.74	6674.78
IIPGFMCQGGDFTR	Q6DGG1	Peptidyl-prolyl cis-trans isomerase A	7023.19	18732.8	19238.6	18998.8	27936.9	11659.5	13974.8	11376	10700.7	17336.1	11811.9	10847.7	7861.84	15048.8	7585.16	13527
EFADSLGVPFLETSAK	Q6I7R3	Ras-related protein Rab-1B	5167.71	10480.4	14934.5	21301.5	24286.4	28046.4	9296.7	9353.06	10164.7	9848.91	9913.84	20404.8	17358.4	13073.5	16738.5	14906.9
MNPEYDYLFK	Q6IE70	Ras-related protein Rab-1B	3023.52	4148.8	6877.05	9900.23	11241.2	12167.3	5589.54	5340.38	6727.75	5735.43	3699.07	8941.71	7804.16	7644.4	4217.86	6156.82
GAHGIIVVYDVTDQESYANVK	Q6IFW6	Ras-related protein Rab-1B	2994.63	2868.15	1803.85	N/A	691.403	N/A	3024.2	1555.6	598.724	2168.75	2199.85	N/A	N/A	2350.81	1379.33	2158.2
ELNIQVDDGYAR	Q6IMF3	1-phosphatidylinositol 4,5-bisphosphate phosphodiesterase delta-1	5504.27	2011.4	2623.14	3465.9	1768.4	2502.79	2788.87	3153.54	2148.08	2672.63	3867.88	3584.22	4006.44	2105.23	4309.19	2215.19
IISGQQLPK	Q6IMY8	1-phosphatidylinositol 4,5-bisphosphate phosphodiesterase delta-1	7207.33	N/A	5671.46	7256.2	6395.64	6763.15	7267.11	6385.6	7183.32	6098.62	6043.19	7089.72	6403.12	5705.92	6899.4	7417.86
VIVEIHGVGR	Q6IRE4	1-phosphatidylinositol 4,5-bisphosphate phosphodiesterase delta-1	2375.84	1856.19	2206.44	2031.51	2248.76	1962.07	2055.12	2059.65	2184.44	2371.46	1829.4	1556.97	3262.87	2253.1	2300.88	2216.57
SPESQLFSIEDIQEVR	Q6JE36	1-phosphatidylinositol 4,5-bisphosphate phosphodiesterase delta-1	2033.92	2708.78	1707.48	2103.83	2165.94	2696.33	2852.64	4201.83	1411.39	2091.56	3282.2	3018.12	4071.26	3713.29	4858.31	3265.14
EEEAGPALALSLIER	Q6KC51	1-phosphatidylinositol 4,5-bisphosphate phosphodiesterase delta-1	1656.81	3510.59	4064.38	6952.87	6326.73	4042.86	3803.3	2284.62	4797.84	3390.51	3314.27	7765.49	6040.32	3969.46	5796.29	4879.26
AFEEAAGSAETLSVER	Q6MG06	1-phosphatidylinositol 4,5-bisphosphate phosphodiesterase delta-1	6479.78	4100.2	3289.17	4255.22	3340.93	3538.1	4126.67	4401.08	2790.54	3304.6	2990.56	4093.52	3902.43	2917.5	3590.94	3805.6
IPVGPETLGR	Q6MG49	ATP synthase subunit beta, mitochondrial	1.00763e+06	1.34602e+06	1.36109e+06	1261142	1.42296e+06	1.57573e+06	1.4966e+06	1.49048e+06	1.18307e+06	1.50467e+06	1.34944e+06	1.67465e+06	1.45949e+06	1.37219e+06	1.72244e+06	1.56362e+06
AIAELGIYPAVDPLDSTSR	Q6MG55	ATP synthase subunit beta, mitochondrial	161474	423393	429870	552940	679159	1.04721e+06	365536	380029	375552	403721	297402	769445	628476	451876	612345	555682
VLDSGAPIK	Q6MG60	ATP synthase subunit beta, mitochondrial	329111	360729	299988	298749	337715	381359	405470	365191	324845	336041	331934	495656	400436	330996	445296	369678
VALTGLTVAEYFR	Q6MG61	ATP synthase subunit beta, mitochondrial	107840	287788	143030	164883	279550	257923	143855	221983	197462	239830	150736	222227	312813	277408	173348	202002
FTQAGSEVSALLGR	Q6NYB7	ATP synthase subunit beta, mitochondrial	135638	347812	154851	158288	158531	198859	191718	212288	141255	174760	176080	211353	208374	189350	237008	221039
DQEGQDVLLFIDNIFR	Q6P4Z6	ATP synthase subunit beta, mitochondrial	672.322	15393.6	10910.6	2837.74	N/A	4373.66	14717.3	10370	10927.1	7321.5	13626.3	13007.3	8114.85	7987.96	19120.2	18146.3
LVLEVAQHLGESTVR	Q6P502	ATP synthase subunit beta, mitochondrial	68943.8	107317	69139.9	68836.9	86020.8	41793.6	102510	106344	79573.6	120222	81045.5	79176.9	106874	98467.4	84292.6	85315.7
AHGGYSVFAGVGER	Q6P6R2	ATP synthase subunit beta, mitochondrial	113577	125357	75884.2	68446.7	101209	67635.8	93542.2	97576.7	85167.5	104083	83790.2	76735	103074	110046	85430.5	103508
VALVYGQMNEPPGAR	Q6P6T4	ATP synthase subunit beta, mitochondrial	65183.2	176081	138488	125411	195731	82675.6	99569.1	83100.2	133552	98064.2	56122.5	125642	80385.6	89404.3	66100.8	73510.7
TVLIMELINNVAK	Q6P6V0	ATP synthase subunit beta, mitochondrial	10651.7	57726.3	41605.3	39509.8	83786	48556.9	21089	23765	43188.9	32371.1	19425.5	50147.6	65446.6	31145.6	31682.4	39283.2
VVDLLAPYAK	Q6P747	ATP synthase subunit beta, mitochondrial	170239	422222	144591	203339	236141	576137	255914	276629	366646	214797	224099	599665	556490	219288	285555	276131
IMDPNIVGSEHYDVAR	Q6P799	ATP synthase subunit beta, mitochondrial	35879.9	65088.2	50511.4	54157.8	119030	52746.2	59514.6	46959.4	54221.6	54211.9	33844.4	49997.2	43126.4	54546.9	33021.6	41095.6
IMNVIGEPIDER	Q6P7B0	ATP synthase subunit beta, mitochondrial	52967.9	113733	79085.3	81851.7	164971	117805	118091	121202	81159.5	77002.4	87466.8	123526	114887	124489	91037.8	103537
IGLFGGAGVGK	Q6P7P5	ATP synthase subunit beta, mitochondrial	386313	803788	567349	732640	835149	873624	680426	632901	744860	784161	548916	602609	798932	722456	630668	707087
TIAMDGTEGLVR	Q6P7Q4	ATP synthase subunit beta, mitochondrial	108996	140939	71915.8	239985	632573	212176	111515	136443	134198	139022	160940	235686	123296	229966	193669	187021
EGNDLYHEMIESGVINLK	Q6P7S1	ATP synthase subunit beta, mitochondrial	8544.42	19093.8	19616	18402.4	21469.7	17513.3	20529.9	18112.7	13674	17626.2	17209	21300.9	24003.2	17643.1	21703.5	20811.1
SLQDIIAILGMDELSEEDK	Q6P9T8	ATP synthase subunit beta, mitochondrial	74.7091	1166.16	2018.77	5997.41	N/A	3656.72	907.034	366.496	1036.62	4287.73	1099.43	1320.79	N/A	1010.19	2686.22	2148.76
IPSAVGYQPTLATDMGTMQER	Q6PCU2	ATP synthase subunit beta, mitochondrial	5518.99	21234.5	45117.7	94780.5	200076	73063.9	85645.9	47327	98922.6	30304.5	28834	69554	53418.4	78959.9	16155.7	53785.3
FLSQPFQVAEVFTGHMGK	Q6PDU1	ATP synthase subunit beta, mitochondrial	3669.05	13899.9	17766.7	14470.4	39068.9	10492.6	6457.73	7532.46	19952.9	12889.5	5436.12	13255.2	18945.3	12619.2	9741.66	14526.2
GFQQILAGDYDHLPEQAFYMVGPIEEAVAK	Q6PDU7	ATP synthase subunit beta, mitochondrial	1075.61	2431.92	4348.63	3070.31	5709.93	N/A	5237.48	5075.79	3754.91	6252.82	1995.65	N/A	N/A	2874.97	3711.84	4653.29
VLDSGAPIKIPVGPETLGR	Q6PEC0	ATP synthase subunit beta, mitochondrial	1907.99	1978.9	1758.78	N/A	5312.92	N/A	3213.49	3119.89	2807.82	2466.59	2574.84	N/A	N/A	2747.98	2455.16	3261.73
VAVVAGYGDVGK	Q6PEC3	Adenosylhomocysteinase	107047	114550	93927.9	77759	113043	104795	99082.1	102410	99570	98790.7	81726.1	116413	110007	95047.2	106152	116450
IILLAEGR	Q6PEC4	Adenosylhomocysteinase	65084.8	90768	85632.2	82413.3	94530.9	68944.1	89786.9	85559.2	77561.4	86198	79903.7	93158.5	91525.2	94522	83564	97144.8
HPQLLSGIR	Q6Q0N1	Adenosylhomocysteinase	17232.3	39708.5	26378.3	25170.4	30507.5	17719.4	31650	32280.7	28556.7	32130.2	28173.7	25647.5	30597.1	37981.1	27067.6	36730
GISEETTTGVHNLYK	Q6Q0N3	Adenosylhomocysteinase	13704.1	16574.7	12700.7	13121.3	13972.8	13268.1	14359	14795.4	10174.6	13413	12676.8	14466.6	15394.8	13932.8	14089.2	15145.4
VNIKPQVDR	Q6QLM7	Adenosylhomocysteinase	4249.73	6354.25	6422.67	5061.21	5240.38	5647.92	6105.86	7656.42	4214.36	6193.99	6567.46	8498.74	5697.73	6929.23	6935.69	6656.69
LDEAVAEAHLGK	Q6R556	Adenosylhomocysteinase	4176.92	1728.47	3083.39	2796.2	2590.48	2338.02	2775.21	2739.08	2786.39	3481.76	2757.88	3745.55	2013.23	2038.51	3784.59	5821.07
KLDEAVAEAHLGK	Q6RJR6	Adenosylhomocysteinase	8742.06	6290.39	7893.59	7439.77	4313.82	7417.86	6595.4	5500.4	7957.22	5023.34	4480.47	8782.46	7980.58	4897.48	7388.85	10094.9
YPVGVHFLPK	Q6RUV5	Adenosylhomocysteinase	1279.08	10113.3	1565.47	2351.47	2744.55	2227.83	1290.01	1193.44	3261.34	5536.26	1446.98	N/A	3524.52	4319.62	574.243	901.367
VPAINVNDSVTK	Q6TEK3	Adenosylhomocysteinase	57976.6	65789.4	62857.8	60360.1	64296	66194.3	62380.7	63968.2	53852.2	61207.5	59092	69673.1	61567.5	57027.1	66173.3	70555.8
DGPLNMILDDGGDLTNLIHTK	Q6TRW4	Adenosylhomocysteinase	1702.37	4613.11	11393.9	8702.43	14762.5	4951.24	6170.98	4189.09	8443.4	11395.1	3828.26	11889.1	8097.02	9043.47	6132.61	7194.38
VADIGLAAWGR	Q6UPE1	Adenosylhomocysteinase	27557.2	13995	4489.28	N/A	N/A	4190.85	14765.2	10383.1	8577.32	4249.94	13512.3	9530.72	5195.91	7662.44	9491.07	14171.6
AGIPVFAWK	Q6UPR8	Adenosylhomocysteinase	7206.63	5099.52	1335.99	N/A	N/A	1892.15	3646.65	2825.91	2723.12	1705.8	3431.38	N/A	2097.84	3508.96	2346.41	3666.93
ALDIAENEMPGLMR	Q6URK4	Adenosylhomocysteinase	5560.42	23027	12854	14520.2	21095.5	17771.8	11375.2	13350.9	13476.2	10767.7	9245.3	18682	13837.6	13098.1	7888.04	13755.3
VIITEIDPINALQAAMEGYEVTTMDEACK	Q704E8	Adenosylhomocysteinase	36.58	2897.84	5662.34	7553.39	4759.07	3694.94	1259.53	1050.33	3484.9	5456.92	963.253	934.385	N/A	623.027	2122	N/A
YSTDVSVDEVK	Q704S8	Glutamate dehydrogenase 1, mitochondrial	55965.5	54605.8	49022	46321	49839.9	57048.7	59249.5	62186	47065.2	46704.8	55836.3	73205.6	55808.5	52537.7	58413.7	60632.1
TAAYVNAIEK	Q711G3	Glutamate dehydrogenase 1, mitochondrial	29948.5	30879.9	29287.7	29289.2	31090.5	36518.7	36688.5	38136.4	32240.6	28716.1	31932.5	42372.8	37560.9	33027.9	37945.6	36830.2
VYEGSILEADCDILIPAASEK	Q71TY3	Glutamate dehydrogenase 1, mitochondrial	11137.5	9636.1	26241.9	36304.3	29006.3	53469.2	26372.6	23477.8	24965.5	21967.5	19226.4	35248.9	28447.1	20019.7	22754.4	25860.3
YNLGLDLR	Q75Q39	Glutamate dehydrogenase 1, mitochondrial	22934	24069	23668.1	23693.1	28669.2	27536.7	26307.7	24987.5	21693	25589.6	23370	27607.7	29381.4	27999.4	27791.7	29769.5
CAVVDVPFGGAK	Q765A7	Glutamate dehydrogenase 1, mitochondrial	19983.2	18726.4	21934.3	18131.1	17007.3	19363	21571.9	23625.2	15221.1	20431.7	22277	27277	23321.9	19095.8	23186	23832.9
IIAEGANGPTTPEADK	Q76M68	Glutamate dehydrogenase 1, mitochondrial	14010.4	13252.8	10297.8	13382.5	9907.01	14318.4	11519.4	12787.2	10559.6	10375.5	10743.2	14861.5	12051	11954.3	13301.5	12642.9
HGGTIPVVPTAEFQDR	Q78P75	Glutamate dehydrogenase 1, mitochondrial	12315	13778.6	10162.4	9506.48	13972	10035.3	13516.5	24379.8	10761.9	13560.5	14188.5	13039.4	11241.1	12044.2	11956	14671.8
LQHGSILGFPK	Q792H5	Glutamate dehydrogenase 1, mitochondrial	8208.92	15092.2	11564.8	14967.5	19426.4	10841.7	14797.7	15623.8	9596.04	9758.14	7184.82	9796.85	9049.73	15230.6	10012	12107.4
MVEGFFDR	Q792I0	Glutamate dehydrogenase 1, mitochondrial	10021.5	20868.5	29168.8	29088.8	36824.3	19009.8	31542.4	24334.3	27791.7	29745.1	20439.2	26851.9	23314.1	31490.2	18533.4	23834.9
DDGSWEVIEGYR	Q793F9	Glutamate dehydrogenase 1, mitochondrial	10971	9416.25	2015.71	N/A	337.72	5940.39	10141.5	6579.07	4830.63	1701.32	7906.62	9912.77	3485.86	5960.8	6381.09	8515
ALASLMTYK	Q794E4	Glutamate dehydrogenase 1, mitochondrial	10109.4	26698.7	28217.6	27162.3	38590.5	26624.2	29870.7	22598.5	29906.9	28843.6	15189.8	23434.8	25287.7	24922.9	13976	22774.3
GFIGPGIDVPAPDMSTGER	Q794F9	Glutamate dehydrogenase 1, mitochondrial	1849.46	11414.1	5172.23	5439.05	6910.62	14041.4	8327.81	8098.06	8835.72	4087.66	5349.66	12869.2	9831.2	10832.4	7142.59	9050.31
DIVHSGLAYTMER	Q7M0E3	Glutamate dehydrogenase 1, mitochondrial	886.047	2781.55	3972.97	4979.29	4938.11	2310.11	2912.83	1668.57	2145.78	4865.27	N/A	2312.41	1371.56	3641.48	N/A	1187.28
DSNYHLLMSVQESLER	Q7M767	Glutamate dehydrogenase 1, mitochondrial	873.77	3079.89	2730.89	2885.27	5821.59	N/A	6740.8	5520.3	3987.42	3213.84	3399.14	4614.89	2866.85	5431.36	2568.05	3031.73
VNPIQGFSAK	Q7TMA5	Cytochrome c oxidase subunit 4 isoform 1, mitochondrial	5410.99	8883.5	8511.67	7179.91	8072.66	6893.29	6950.59	7893.76	7255.76	5755.88	9577.14	8961.04	6270.99	7642.12	8040.32	8604.23
DYPLPDVAHVK	Q7TNY6	Cytochrome c oxidase subunit 4 isoform 1, mitochondrial	11290.1	16256.1	12761.1	13807.2	13094.9	16655.7	13700	15021.4	11608.7	11501.1	12592.7	15219.3	13571.9	14475.1	16825.1	16648.4
SEDYALPSYVDR	Q7TP47	Cytochrome c oxidase subunit 4 isoform 1, mitochondrial	87711.4	86309.8	74529.8	75644.6	73421.8	97009.7	89031.6	91375.3	70204.4	59593.8	80425.3	93306.7	70864	80170.6	96334.3	107110
IQFNESFAEMNK	Q7TP48	Cytochrome c oxidase subunit 4 isoform 1, mitochondrial	2571.2	10554.1	10980.7	11749.8	10348.2	8422.27	10060.1	6985.56	8502.84	7766.33	6493.96	7633.16	3083.68	8272.96	3559.53	8823.32
TFDEIASGFR	Q7TP54	Solute carrier family 2, facilitated glucose transporter member 1	210111	343189	267215	181430	281838	274779	370227	347068	229208	297958	334909	436388	294796	282116	252921	375838
VTILELFR	Q7TP98	Solute carrier family 2, facilitated glucose transporter member 1	13811.2	41014.9	38581	15252	77084.4	17279.1	30308.3	34082	34089.7	57963.9	27450.3	54902.9	46901.9	40162.2	25689.1	45229.6
TPEELFHPLGADSQV	Q7TPB1	Solute carrier family 2, facilitated glucose transporter member 1	6108.27	10050	11485.8	13298.3	11089.9	29173.5	16924.3	9319.09	5033.23	13315.8	9999.92	16154	20495.8	11291.1	23155.9	16138
EAFQEALAAAGDK	Q7TPJ0	Thioredoxin	2428.48	2505.3	3397.91	2728.9	2284.22	3313.04	2759.43	2851.1	2023.16	1984.06	4092.86	2082.76	3754.98	2427.56	2903.26	3677.72
LNDFASAVR	Q7TSA0	Cytochrome c oxidase subunit 5A, mitochondrial	1988.11	1790.38	3158.21	3598.42	2621.01	4170.02	3058.28	2670.8	2067.06	2732.77	3440.96	2482.89	N/A	2459.28	2815.19	1899.72
AFLIEEQK	Q7TT49	60S ribosomal protein L34	11836.3	12633	15419.5	14877.2	11105.2	14421.2	11390.2	11217.4	14071.9	11211.6	13373.4	14058.6	10639.8	12533.2	12197.1	17054.2
IVYLYTK	Q80U96	60S ribosomal protein L34	8019.92	9727.04	7894.28	9881.64	8820.03	8630.86	7181.58	7520.61	10726.9	8117.95	7374.29	6044.8	7461.35	8716.45	7054.92	11161.8
ITQYLDAGGIPR	Q80W83	Calcium/calmodulin-dependent protein kinase type II subunit alpha	3644.13	3924.13	3829.84	4160.3	3392.87	4541.67	4278.15	2709.85	3157.69	3948.17	3969.37	3380.55	2940.35	4132.12	2761.57	3327.57
EGGLLTLAGAK	Q80W89	Dihydropteridine reductase	10977.7	8759.22	8656.26	7088.44	9286.01	7637.42	8123.21	9440.47	6710.8	7005.95	8402.51	9461.71	8186.54	8197.15	9731.63	10365.2
RPNSGSLIQVVTTDGK	Q80W92	Dihydropteridine reductase	7964.6	10888.2	7062.69	7585.71	9961.95	5945.16	7996.89	7926.79	6574.49	8264.24	6736.01	5197.74	7506.23	8545.82	7367.56	9873.26
IVLDNSVFSEHR	Q80WE1	Clathrin heavy chain 1	84047.5	109939	94511.1	93580.1	85221.6	109689	119406	96832.7	108288	93155.6	86225.4	109265	111933	95005.5	111350	100122
EAIDSYIK	Q80Z29	Clathrin heavy chain 1	180615	147243	143866	171378	138221	200603	166673	182226	190566	145191	153941	205554	238938	157392	217831	158388
EVCFACVDGK	Q80Z30	Clathrin heavy chain 1	162408	167031	154545	150600	122769	171259	198690	179221	165296	136822	173960	185352	193751	156330	182912	182659
HELIEFR	Q80Z70	Clathrin heavy chain 1	148863	205362	135544	116499	128146	130344	172938	186113	175345	139626	146203	171773	208537	169044	194511	167498
LPVVIGGLLDVDCSEDVIK	Q80ZA5	Clathrin heavy chain 1	20900.8	64760.8	50652.6	100179	37895.5	103293	52540.5	40313.2	60062.2	42349.6	36259.8	74054.5	79007.5	39033	53429.6	48781
IYIDSNNNPER	Q80ZG0	Clathrin heavy chain 1	113738	84996.4	90024	88588.2	65750.2	120342	101382	108996	117454	77398.8	101974	138281	130622	97813.8	131506	98747.6
EDKLECSEELGDLVK	Q812D1	Clathrin heavy chain 1	36246.6	31831.6	28330	29684.9	30178.9	36227.7	31980.3	28296.5	37684.8	26573.2	31375.2	37015	38181.8	33827.4	34924	30916.8
ALEHFTDLYDIK	Q812E9	Clathrin heavy chain 1	27536	31246.4	24652.4	27246.4	24827.2	30287.3	33673.3	29750.9	36438.7	25389.2	29410.1	40394.6	43125.1	32973.9	42306.9	31893
GQCDLELINVCNENSLFK	Q8CF97	Clathrin heavy chain 1	22823	26350.5	29998	29058.3	23370.4	47154.6	25270.4	26318.3	26987.3	22804.9	27235.1	39507.6	37395.8	27137.7	34554	29150.8
VDKLDASESLR	Q8CFD0	Clathrin heavy chain 1	17045.4	19869.8	22119.2	17807.9	14652.1	22842.7	18855.3	23395.8	23583.8	15284.1	17022.6	27192.6	24497.7	21339.6	25970.3	20436.6
DPHLACVAYER	Q8CFG6	Clathrin heavy chain 1	24991.8	16462.2	15806.2	16397.1	16396.7	20545.9	21116.2	21083.2	20739.2	16638.8	17715.2	21744.1	25091.3	18548.1	23039.4	20471.6
VIQCFAETGQVQK	Q8CFN2	Clathrin heavy chain 1	95059.1	78006.2	64977.4	71357.4	52371.4	74435.4	69247.1	69456.4	75568.7	62307.8	76660.5	69316.3	81995.9	69087.4	88964.9	70327.2
HSSLAGCQIINYR	Q8CG45	Clathrin heavy chain 1	70898.6	64470.9	49632	54282.2	54875.2	54539	54890.4	54395.7	58323.2	58343.7	55667.5	55196.7	69950.7	60979.1	63468.3	56827.9
LTDQLPLIIVCDR	Q8CGU6	Clathrin heavy chain 1	52873.5	182921	83227	91131.4	103487	168819	78518.4	89640.5	97753.6	67635.8	93526	137656	153794	91444.9	124494	95367.6
IAAYLFK	Q8CJB9	Clathrin heavy chain 1	100415	49510	48670	55845.5	52317.4	53579.9	50160.8	50618.2	69166.1	51229.7	45303.1	48757.5	70242.7	57103.3	52741.5	52323.6
ESYVETELIFALAK	Q8K1P7	Clathrin heavy chain 1	7349.45	11813.5	7862.14	7014.61	10493.9	9957.68	14121.5	23795.6	9738.72	6026.91	9996.96	13268.6	17119.4	11001.8	12977.1	18650.7
VSQPIEGHAASFAQFK	Q8K1Q0	Clathrin heavy chain 1	71734.7	49842.4	29792.8	25865.6	28381.3	25018.6	49157.6	44693.7	31185.7	24534.3	28079.4	50515.4	29932.6	25408.3	25825.6	49958.7
IHEGCEEPATHNALAK	Q8K3P4	Clathrin heavy chain 1	2475.48	3678.47	2778.21	1923.57	2191.07	1683.82	3856.39	4402.72	3991.41	2522.88	2797.52	3213.82	2421.45	2328.61	2216.71	3118.97
HDVVFLITK	Q8K4F7	Clathrin heavy chain 1	88202.8	102289	37203.2	27705.8	38650.4	39222.3	38765.3	82598.4	45499.4	42377	37410.9	84429.9	54165.4	50987.7	98873.3	82900.5
KFNALFAQGNYSEAAK	Q8K4V4	Clathrin heavy chain 1	43427.5	23830.1	15738.6	14132	19267.2	29184.9	30356	33192.5	21767.6	15377.3	17748.6	27473.6	23328.5	18396.6	34543.6	33001
NLQNLLILTAIK	Q8K582	Clathrin heavy chain 1	32640.8	115445	35250.6	50248.5	152736	100461	52482.8	28062.1	65568.4	46906.4	22762.6	81257.8	89237.8	59469	72968.1	65305.1
AVDVFFPPEAQNDFPVAMQISEK	Q8R431	Clathrin heavy chain 1	8651.06	16563.1	36136.1	46685	60622.1	55326.6	21777	17155.5	30469	23212.9	17613.4	39708.4	28724.4	23324.2	30315	24487.1
TSIDAYDNFDNISLAQR	Q8R478	Clathrin heavy chain 1	40919.8	46668.7	51552.5	57163.2	41276.4	96002.2	57658.3	67048.3	52864.6	36176.2	51749	90492.2	76366.3	49426.4	93573.9	60985.5
LASTLVHLGEYQAAVDGAR	Q8R491	Clathrin heavy chain 1	53005.8	94336.9	39163.4	118625	41326.8	130715	167109	74733.3	55409.4	45047.5	67781.8	186561	103657	79550.6	99783.6	165241
AFMTADLPNELIELLEK	Q8R4A1	Clathrin heavy chain 1	1362.72	21428.6	20209.5	20657.3	21804.1	15340.7	12311.6	6857.72	19452.3	22899	6964.64	15530.5	10049	12939.1	13103.1	13351.2
SVDPTLALSVYLR	Q8R500	Clathrin heavy chain 1	10997.7	30815.3	11706.2	20890.8	9695.91	22924.6	24335	22103.9	14533.5	13785.9	11897.5	12087.3	25194.9	24004	14933.1	17639.7
GQFSTDELVAEVEK	Q8R5H8	Clathrin heavy chain 1	119984	119131	64678.1	81618.8	98740.5	223199	152773	166252	83934.9	93485.7	130004	209860	182508	147608	190652	143940
RPISADSAIMNPASK	Q8VBU2	Clathrin heavy chain 1	22460.5	28093.1	39287	38037.4	49998.1	37913.7	35051.8	25471.4	49643.2	28117.2	25811	38886.1	35814.8	33945.2	35906.3	36889.6
VVGAMQLYSVDR	Q8VD52	Clathrin heavy chain 1	5412.05	19005.2	23923.6	23015.1	28408.8	19844.4	22231.8	18808.3	27452.4	20159.5	7574.38	17437.5	23560.4	22293.8	8392.4	19394.2
ISGETIFVTAPHEATAGIIGVNR	Q8VHF5	Clathrin heavy chain 1	49543.5	122571	46323.7	44689.5	85258.1	93141	50277.9	101294	66651.4	41165.7	42156.5	125326	67599	53521.6	62945	52532.2
NNLAGAEELFAR	Q8VHK2	Clathrin heavy chain 1	477954	325136	306134	322624	274281	439422	379534	409035	371877	263005	355108	514676	458384	386660	487937	417892
LLYNNVSNFGR	Q8VHK7	Clathrin heavy chain 1	122469	207182	161090	174550	178356	248000	191397	191453	229105	178039	167469	172743	237552	183639	168340	168338
VANVELYYK	Q8VHU4	Clathrin heavy chain 1	208887	154022	138292	161966	129847	184819	179240	170490	207095	147826	142068	169831	223714	160381	202696	166716
NLILVVR	Q8VHV7	Clathrin heavy chain 1	138357	165784	101123	82828.9	121098	63136.7	111905	106103	169110	136080	92865.4	115334	171993	142276	130279	114152
YIEIYVQK	Q8VI04	Clathrin heavy chain 1	156546	133978	99101.6	73130.8	94858.1	79214.7	114811	118346	126819	117517	105351	114556	159085	133225	133029	121037
SVNESLNNLFITEEDYQALR	Q8VIF7	Clathrin heavy chain 1	63932.1	44099.7	94074	74972.3	56758.3	87398.6	92525.1	83141.5	82439.2	58940.4	75801	130563	83625.4	77631.6	115976	85610.5
LECSEELGDLVK	Q8VIJ5	Clathrin heavy chain 1	64119.6	60918.9	55130.1	61981.4	44927.6	81650.5	59849.9	64566.5	64187	44158.6	59051.1	70545.1	77792.8	61085.9	73180.2	64973.3
FNALFAQGNYSEAAK	Q8VIL3	Clathrin heavy chain 1	47421.3	27453.5	33584.1	32946.1	25011.7	46375.2	37925	36403.8	35005.4	32802.9	36371.4	45815.8	47775.6	37171.4	50222.4	44564.7
LAELEEFINGPNNAHIQQVGDR	Q91V33	Clathrin heavy chain 1	21590.6	36866.4	31465.7	22925.8	25121.4	26848.8	32404.5	29422.1	27570.9	22701.4	32911.9	38747.2	34185.2	27739.8	42168.5	28865.6
LLLPWLEAR	Q91XU8	Clathrin heavy chain 1	34242.1	39338.4	7306.06	1471.49	3276.5	13197	19644.9	20211.5	29154.7	8320.02	20424.7	23113	43215.7	24222.5	20730.2	20095.5
YESLELCRPVLQQGR	Q91Y81	Clathrin heavy chain 1	15767.7	19668.7	16058.8	12318.9	17877.8	8167.74	15441.7	13379.2	18386.3	15273.9	18325.9	12615.2	12987.9	13928	12048.5	13569.3
GQFSTDELVAEVEKR	Q91Z79	Clathrin heavy chain 1	9617.26	13092.3	11363.7	9342.12	12266.6	6810.47	10427.4	11060	14390.9	11793.9	11917.8	11790.8	17006.9	15302.9	11001.7	11167.7
CNEPAVWSQLAK	Q920J4	Clathrin heavy chain 1	35039.6	17282.5	7867.93	N/A	1674.05	12645.3	20208.4	13948.3	16851	8158.59	21294.5	16042.5	11701.2	15663.6	19933.9	15395.1
AMLSANIR	Q920L2	Clathrin heavy chain 1	10288.7	N/A	5637.7	5343.07	2344.6	9043.4	7783.03	6829.98	8832.9	5985.63	8836.31	8377.9	7951.7	9344.88	12771.5	10649.1
VGYTPDWIFLLR	Q923S8	Clathrin heavy chain 1	5705.91	64163.9	3803.28	N/A	N/A	8103.45	11912	10142.3	23421.4	5952.82	19311	29184.2	57196.4	42278.6	20961	19588.2
LHIIEVGTPPTGNQPFPK	Q924K2	Clathrin heavy chain 1	48671.3	49950.7	50194.4	52571.7	52795.2	46648.5	118509	57991.8	68604.6	60405.7	51941.8	107056	67442.9	58067.7	60057.9	113125
MEGNAEESTLFCFAVR	Q924S1	Clathrin heavy chain 1	4006.42	5416.8	5350.75	3307.44	2299.33	1723.04	4953.36	5822.95	3089.3	3599.78	4678.98	2856.87	2935.29	3778.48	4863.15	3342.79
RPLIDQVVQTALSETQDPEEVSVTVK	Q924S5	Clathrin heavy chain 1	16639.2	21737.4	9099.76	10401.1	15839.3	18721	22598.2	51207.7	13984.6	12028.6	19970.1	18262	26761.7	16811.9	29479.3	20394.3
WLLLTGISAQQNR	Q99JD4	Clathrin heavy chain 1	9191	36592.6	N/A	458.249	3262.01	7379.82	1042.87	7270.06	21597.1	7864.11	569.668	N/A	24939.9	18126	829.195	N/A
ADDPSSYMEVVQAANTSGNWEELVK	Q99JE4	Clathrin heavy chain 1	4385.47	2445.6	1145.5	1007.56	N/A	3316.73	3118.58	2265	2539.04	1182.45	3246.37	3206.74	1601.41	2290.76	3769.83	2556.37
QLPLVKPYLR	Q99JE6	Clathrin heavy chain 1	N/A	5401.48	2684.27	2903.43	6099.29	N/A	1980.14	3810.62	5964.97	5075.45	3466.7	N/A	5255.08	5010.43	N/A	3118.75
FQSVPAQPGQTSPLLQYFGILLDQGQLNK	Q99M63	Clathrin heavy chain 1	431.536	8552.58	4310.69	5478.54	6678.09	1623.69	7386.91	2256.27	9965.83	13724.1	5434.59	2283.44	4735.72	11641.9	4080.22	6340.09
VGEQAQVVIIDMNDPSNPIR	Q99MH9	Clathrin heavy chain 1	10922.5	15161.7	70367.4	75582.4	61036.8	72149	72134.9	29862.1	71865.3	26191	15365.5	31347.4	49367.2	50294.3	25134.1	23421.2
FQEHLQLQNLGINPANIGFSTLTMESDK	Q99MI7	Clathrin heavy chain 1	1757.61	4206.27	2115.01	1712.28	N/A	N/A	4425.9	4578.34	3229.09	2188.61	1356.48	1594.29	N/A	1963.25	2754.98	2339.77
TLQIFNIEMK	Q99ML5	Clathrin heavy chain 1	9650.71	49408	52395	58796.2	61948.1	60731.1	46256.6	44639.6	67848.1	46157.7	32130.5	55601	59738.2	53674.1	41263.1	45364.6
RDPHLACVAYER	Q99MS0	Clathrin heavy chain 1	2585.59	2772.03	2005.79	1564.51	2667.47	N/A	2451.67	2107.91	2282.26	2947.89	2675.39	N/A	2022.42	2207.65	800.285	1126.97
AHTMTDDVTFWK	Q99MZ4	Clathrin heavy chain 1	9376.86	14460.9	4063.17	N/A	N/A	4713.08	16782.5	5153.19	11012.3	3406.21	7472.52	N/A	4681.39	6254.47	N/A	9810.62
AHMGMFTELAILYSK	Q99MZ8	Clathrin heavy chain 1	2409.44	4481.04	2701.55	1823.64	5247.55	N/A	3581.76	2936.86	6281.03	5566.66	1754.23	N/A	2643.47	2757.65	1168.11	1560.35
AILQLVR	Q99N27	Steroid hormone receptor ERR2	29712	40888.2	1887.26	68075.8	47521.5	79528.9	N/A	44678.9	81583.4	54140.3	1677.71	55825.4	2600.77	2598.79	49217.9	78728.7
DFTVASPAEFVTR	Q99NA5	Acetyl-CoA carboxylase 1	1499.11	1047.34	2967.52	3598.59	1696.94	3677.51	1357.96	916.015	3005.26	2450.14	2113.66	1772.41	3116	2196.22	2441.49	N/A
IGLAEEIR	Q99PD4	Acetyl-CoA carboxylase 1	3974.84	5551.21	5248.78	5327.68	N/A	5401.82	N/A	5096.7	5747.1	5031.92	4727.76	5527.85	6439.22	5849.78	4608.84	4443.98
VEVGTEVTDYR	Q99PF5	Acetyl-CoA carboxylase 1	2862.74	1910.15	3817.47	3860.81	N/A	N/A	3647.82	3301.83	3164.2	3134.14	3164.6	N/A	4670.15	3547.13	3114.05	2569.09
NEIPEEALYK	Q9EPB1	Plasma membrane calcium-transporting ATPase 1	59269.6	48525.1	44563.6	52008	48129.2	65921.5	54659.5	59898.6	58345.8	43174.7	53058.8	69660.7	61823.8	48673.9	68650.5	55842
TICLAFR	Q9EPC6	Plasma membrane calcium-transporting ATPase 1	27236.8	37148.5	19452.5	31996.7	30633	31848.9	23249.1	27824	39428.7	34035.4	23191.2	23022.1	46868.7	35758.1	26954.4	26069.4
FFDIDSGR	Q9EPF2	Plasma membrane calcium-transporting ATPase 1	24969.9	23125.7	22657.6	23770.2	19294.3	25610.7	24826.1	21457.3	27049.4	19481.8	20372.8	28464.4	28251	21655.2	24530.7	20650.6
EEIPEEELAEDVEEIDHAER	Q9EPH8	Plasma membrane calcium-transporting ATPase 1	7604.53	9489.43	7163.82	7793.42	4466.11	7531.73	8916.74	8599.92	3626.18	5622.94	7946.03	12752.6	8722.63	7680.66	15846.1	10880.2
GGQVIQIPVADITVGDIAQVK	Q9EQE1	Plasma membrane calcium-transporting ATPase 1	8394.47	11287.6	10777	25897.6	11942.4	31977.9	8912.65	9861.08	15920.5	13023.2	7654.47	15917.7	17301.3	11045.4	11668.8	11481.8
TSPNEGLSGNPADLER	Q9EQH5	Plasma membrane calcium-transporting ATPase 1	75336.3	50750.3	29698	61616.6	60547.6	77251.7	66359.6	68334.3	33904.7	27305.9	66608.6	43434.9	72740.8	70434.2	81010	65551.3
GIIDSTVSEQR	Q9EQS0	Plasma membrane calcium-transporting ATPase 1	107545	86574	76740.4	88920.3	75631.4	108060	94426.1	90545.8	97597	75884.3	84373.6	103942	110006	90891.8	121240	97117.9
IQESYGDVYGICTK	Q9EQV6	Plasma membrane calcium-transporting ATPase 1	20516.4	12728.6	9102.55	11146.1	9067.68	15667.7	13634.2	12689.1	11423.2	9574.9	12862.2	15141	15281.1	12176.4	15613.3	12977.9
KIQESYGDVYGICTK	Q9EQX9	Plasma membrane calcium-transporting ATPase 1	3149.73	4372.5	2701.9	2844.07	2723.74	N/A	4390.93	2411.15	3045.84	3303.05	3931.98	2291.05	3209.6	2251.22	2165.5	3721.27
MTVVQAYINEK	Q9ER34	Plasma membrane calcium-transporting ATPase 1	7411.24	7467.75	13634	12111.3	15688.8	10090.7	11941.8	9414.46	13832.1	11167.7	6482.1	7530.19	8266.82	5445.83	9471.08	9758.5
EANHDGDFGITLAELR	Q9ERH3	Plasma membrane calcium-transporting ATPase 1	11794.7	11548.8	12415.9	11188.1	11445.9	11509.2	15204.3	15074.4	12384.9	12118.8	11133.5	17627.1	13879.1	14349.3	18260.9	13529.2
TVIEPMASEGLR	Q9ES21	Plasma membrane calcium-transporting ATPase 1	11272.2	23513.8	32071	32643.1	37776.7	32482	39360.7	29884.4	41574.4	16463.5	21755.8	34859.9	32774.6	31521.1	27120.6	28922.2
IDESSLTGESDQVR	Q9ES40	Plasma membrane calcium-transporting ATPase 2	16443.3	11526.8	8690.78	10674.6	9026.97	12901	11357.2	11052.2	10692.8	8472.62	10861.9	14054.2	13799	9929.89	13515.9	11100.8
EIPDPSSINAK	Q9ESR9	Plasma membrane calcium-transporting ATPase 2	17933.4	16308.5	16351.9	17483.1	17431.6	19596.5	20967.5	16462.7	18822.6	17618.9	19275.8	22280.4	18559.8	16790.2	21712.2	15724.2
NVFDGIFR	Q9EST6	Plasma membrane calcium-transporting ATPase 2	2028.1	1777.47	1819.85	1547.06	N/A	1537.28	2126.94	1833.58	2835.93	1872.54	1959.96	3023.18	3650.14	2383.57	3824.51	2698.74
EEIPEEELNEDVEEIDHAER	Q9ESW0	Plasma membrane calcium-transporting ATPase 2	2023.4	1604.15	1179.32	1404.28	N/A	2339.72	1827.36	2196.78	738.655	1544.85	1598.96	1617.52	1202.63	1602.3	2895.71	2092
AGQVVQIPVAEIVVGDIAQIK	Q9ET62	Plasma membrane calcium-transporting ATPase 2	1150.5	4299.02	5450	8276.57	7918.59	8476.83	2365	1837.16	5094.27	4115.11	2093.16	3829.11	7873.68	3094.39	2829.63	3577.8
YGDLLPADGLFIQGNDLK	Q9JHL4	Plasma membrane calcium-transporting ATPase 2	4119.71	8980.62	7233.28	8830.05	14656.2	19424.3	4875.51	4374.59	4977.73	6724.23	4042.09	13771.7	12226.1	7032.39	11286.4	8617.23
TSPVEGLPGTAPDLEK	Q9JHU0	Plasma membrane calcium-transporting ATPase 2	13163.1	18618.9	11709.7	16861.6	12212.5	22033	18041.9	15795.9	15243.8	10945.9	13961.5	16959.7	18533.1	14756.8	20446.5	16775.5
EASDIILTDDNFSSIVK	Q9JHW0	Plasma membrane calcium-transporting ATPase 2	5152.27	6785.54	6314.79	8284.49	7588.13	13767	6523.04	7554.13	6993.12	6116.61	6586.46	8894.87	7596.85	6277.18	7741.26	6818.81
VIEPMACDGLR	Q9JHW5	Plasma membrane calcium-transporting ATPase 2	1214.45	2473.4	2685.2	2705.09	3122.83	2243.06	1975.81	2060.12	2754.85	2468.45	1716.5	2067.81	1918.27	2501.13	1849.47	2076.93
MTVVQAYVGDVHYK	Q9JHY2	Plasma membrane calcium-transporting ATPase 2	1968.82	2136.52	3580.06	3395.61	7231.03	2080.19	2879.68	N/A	4671.15	4751.86	N/A	1212.95	N/A	2740.92	898.465	1535.14
EFDELSPSAQR	Q9JHZ4	Sarcoplasmic/endoplasmic reticulum calcium ATPase 2	45131.1	37532.1	35972.4	37715.4	37919	49199.8	42978.2	49189.1	46045.6	34023.2	40590.8	55285.4	47344.1	39150.5	47273.1	44000.4
IGIFGQDEDVTSK	Q9JHZ9	Sarcoplasmic/endoplasmic reticulum calcium ATPase 2	13824.6	13728.6	12193.4	13274.6	12402.4	14874.5	13608.1	14303.7	14639.3	11497.6	13524.9	17448	15393.4	12282.3	15899.1	14705.2
VEGDTCSLNEFTITGSTYAPIGEVQK	Q9JID2	Sarcoplasmic/endoplasmic reticulum calcium ATPase 2	2628.26	2441.61	3601.34	4339.22	2491.91	7095.79	4036.57	4605.58	3338.32	3365.67	3707.86	3551.39	3144.63	3439.07	5221.28	3576.65
DIVPGDIVEIAVGDK	Q9JIL3	Sarcoplasmic/endoplasmic reticulum calcium ATPase 2	8329.01	12804.2	20392.6	17115.2	31811.5	55036.2	12265.9	10644.9	9521.8	16443.6	13369.7	30527	28201.9	14516.9	20133.5	17653.6
SEIGIAMGSGTAVAK	Q9JIL8	Sarcoplasmic/endoplasmic reticulum calcium ATPase 2	2827.6	5896.46	7088.04	9076.14	7943.5	6300.35	4533.59	6257.19	8255.6	6640.51	4843.94	5442.89	6182.82	6785.24	5403.81	5421.2
MNVFDTELK	Q9JIX3	Sarcoplasmic/endoplasmic reticulum calcium ATPase 2	8967.52	37009	38018.6	38566	42627.6	34706.6	36321.8	31921.6	39529.8	31864.1	26746.2	31817.6	32626.4	32751.4	29408.4	34565.4
CLALATHDNPLR	Q9JJ19	Sarcoplasmic/endoplasmic reticulum calcium ATPase 2	2914.97	2035.07	2562.98	2539.47	2810.4	1454.34	2429.69	2191.79	2731.88	1925.2	1948.98	N/A	2294.02	2685.85	1951.19	2635.23
ISLPVILMDETLK	Q9JJ22	Sarcoplasmic/endoplasmic reticulum calcium ATPase 2	1823.83	1716.97	1139.6	N/A	N/A	2009.6	1438.49	1090.81	944.244	N/A	1795.62	1464.92	1547.99	1457.22	3063.3	1965.11
DIVPGDIVEIAVGDKVPADIR	Q9JJ31	Sarcoplasmic/endoplasmic reticulum calcium ATPase 2	829.7	596.382	1759.28	1974.23	2819.25	2186.41	1234.03	1169.73	1683.11	1403.38	1598.85	1862.23	1418.13	1244.58	1182.29	984.409
EEMHLEDSANFIK	Q9JJ50	Sarcoplasmic/endoplasmic reticulum calcium ATPase 2	1984.62	4823.62	4745.41	4865.7	5112.84	3660.81	4084.81	3384.75	4886.55	2571.7	3443.42	2827.64	4677.98	5488.04	3018.93	2610.92
KSEIGIAMGSGTAVAK	Q9JJ54	Sarcoplasmic/endoplasmic reticulum calcium ATPase 2	254.701	N/A	1264.96	972.813	1280.88	696.611	670.83	N/A	1335.76	1158.24	287.264	295.317	485.182	N/A	N/A	261.939
FGDLSSASAIMGNPQVK	Q9JJK1	Hemoglobin subunit beta-2	1997.78	10317.7	9449.38	7215.18	13336.2	6330.63	6818.77	7363.35	3619.67	7924.65	4468.37	11548.6	4928.73	4800.52	3320.79	6873.62
ECPIIGFR	Q9JJM9	Dystrophin	3185.68	2645.78	3029.94	3350.3	2492.1	1865	2398.02	2004.19	2697.58	3222.16	3315.8	2233.75	3199.96	3821.21	3221.99	3313.96
SEPIPETNEGPVK	Q9JJW3	Protein disulfide-isomerase A3	116002	114770	132870	113663	120812	136223	131173	176236	116664	129921	150638	175674	127136	143408	157548	168834
YGVSGYPTLK	Q9JK11	Protein disulfide-isomerase A3	61586.3	54375.5	59722	49021.4	60165.7	59898.1	69076.3	74744.3	46111.2	63170	64120.5	73348.9	61709.6	55895.1	62308.2	65825.3
LAPEYEAAATR	Q9JK72	Protein disulfide-isomerase A3	60479.8	53743.5	47056.7	42758.8	51734.9	50794.3	65121.7	67335.4	35366.7	52877.1	53455.7	71815.6	46698.4	41573.9	56540.9	61196.8
LNFAVASR	Q9JKB0	Protein disulfide-isomerase A3	39111.5	51771.9	45221.1	41512.4	51463.8	47130.9	52286.8	50223.1	41311.1	56252.9	45883.4	45983.5	52471.5	49417.7	45957.8	56721.9
DASVVGFFR	Q9JKE3	Protein disulfide-isomerase A3	29299.7	42519	41957.6	33769.1	41216.2	43418.5	47597.3	49310	34441.9	38987.6	37912.6	57017.8	45601.3	39584.9	46459.6	47289.2
QAGPASVPLR	Q9JL55	Protein disulfide-isomerase A3	40793.3	46409.6	49366.2	42320.5	40535.5	43463.1	48209.5	57474.7	35702.2	48685.6	49590.7	51654.8	47710.8	42600.2	45501.2	53290.9
TADGIVSHLK	Q9JLA3	Protein disulfide-isomerase A3	15501.5	38295.9	31530.4	25668.1	26927.4	31591.5	38512	37169.3	23329.2	23718.8	31690.5	51815.7	34402.4	32166.3	42256.6	40899.6
DPNIVIAK	Q9JLG9	Protein disulfide-isomerase A3	25702.9	22787.9	25882.9	24711.7	28335.7	27486.5	28093.1	34137.7	22334	31060	27420	36158	29565.4	26194.7	29868.9	28883.5
FLQEYFDGNLK	Q9JLJ3	Protein disulfide-isomerase A3	6822.52	7621.07	9212.18	7221.51	8846.72	10996.8	11438.9	11797.4	7198.68	9361.84	10902.7	12444.1	8098.6	7537.79	9013.61	11925.7
FAHTNVESLVK	Q9JLT0	Protein disulfide-isomerase A3	9971.52	8643.45	8428.35	6893.95	8752.88	6662.92	8884.51	10487.3	8382.94	9652.9	10007.9	10603.6	10090.6	9064.78	9405.44	10328.3
EATNPPIIQEEKPK	Q9JLZ1	Protein disulfide-isomerase A3	6008.48	6004.17	8312.46	5661.79	6179.34	7699.98	7837.2	8889.71	5547.15	7551.96	7377.18	10261.3	7168.61	7237.45	6973	7659.62
DLFSDGHSEFLK	Q9JM15	Protein disulfide-isomerase A3	3465.58	2573.22	3563.43	2686.29	4229.57	3103.94	4194.67	4746.16	2645.31	4218.45	3844.22	5568.23	3700.38	4220.28	3926.59	5028.45
FVMQEEFSR	Q9JM53	Protein disulfide-isomerase A3	6354.74	16624.2	10374.1	16491.8	22070	10686.4	16510.9	14647.1	12676.9	10087.5	7157.14	15793.1	12179.9	14611.8	6430.4	11186.7
TFSHELSDFGLESTTGEIPVVAIR	Q9JMJ4	Protein disulfide-isomerase A3	24595.1	37924.7	40928.8	17657.3	29667.4	17931.9	23824.9	52379.6	28085	32850.4	37256.3	60820.6	31693.3	37107.6	46512.2	57658.6
DLLTAYYDVDYEK	Q9QUL6	Protein disulfide-isomerase A3	23664.5	37334.1	46847.3	39671.6	33189.5	62050.1	61470.1	80003.3	37109.3	39292.4	49890.8	78406.3	52662.1	39205.3	54144.4	58273.9
GFPTIYFSPANK	Q9QUR2	Protein disulfide-isomerase A3	24227.7	58173.9	48341.7	51739.2	67011.8	76196.7	52102.9	59618	51092.3	53898.7	44275.7	58365.3	77894.4	66944.7	44366.4	55195.6
ELNDFISYLQR	Q9QVC8	Protein disulfide-isomerase A3	23732.2	30813.3	34418.3	31748	38612.8	41741.3	29538.2	38000.2	26097.2	31259	31999.7	50736.8	40263.6	29138	34072.4	42581.8
MDATANDVPSPYEVK	Q9QW07	Protein disulfide-isomerase A3	20649.8	30509.9	15388.6	23135.1	18042.2	22577.3	29349.1	28540	21993.1	14022.5	20018.9	28247.8	22919.7	26581.2	21077.4	12803.5
ISSQTFPAPPSPK	Q9QWN8	ATP synthase protein 8	19304.1	25697.6	21385.9	21249.6	19911.2	19913.9	21308.3	19472.4	19170.8	16812.3	19561.7	23085.8	20635.6	23038.6	25659.9	22270.1
EIVVVTPQK	Q9QX69	Nuclear pore membrane glycoprotein 210	5099.33	2888.03	3695.47	3581.61	3532.42	5091.81	3532.53	4523.26	5197.46	4067.93	4221.75	4684.46	4820.01	4832.28	4229.34	3703.51
YSPLITINENNPNLINPIK	Q9QX79	NADH-ubiquinone oxidoreductase chain 5	603.383	1331.47	509.248	1064.33	532.074	1023.41	466.172	557.902	726.544	806.08	650.263	356.986	1091.96	767.034	873.554	680.858
FTDDYQLFEELGK	Q9QXQ0	Calcium/calmodulin-dependent protein kinase type II subunit gamma	1663.33	1018.99	1074.64	1101.71	N/A	570.69	1878.15	1215.42	448.822	1349.15	1245.17	17236.5	922.246	1316.8	1461.21	1125.39
SISGALASDLGK	Q9QXU8	Aldehyde dehydrogenase, dimeric NADP-preferring	25540.8	29060.2	24627	10355	24460	4184.2	49929.7	12212.6	5543.13	6643.64	7544.4	15638.8	13799.2	48483.7	9712.02	39788
IQQLEALQR	Q9QXY2	Aldehyde dehydrogenase, dimeric NADP-preferring	10900.3	10409	11776.3	4842.83	9482.64	983.093	21061.6	4840.66	2384.88	2988.98	4276.61	5073.02	5588.32	18830	3485.37	14660.5
TEQGPQVDETQFK	Q9QY16	Aldehyde dehydrogenase, mitochondrial	3229.58	4755.64	3402.46	1312.15	4289.78	2851.44	5054.65	5089.25	1037.33	5105.28	5030.54	5452.52	2334.44	3569.18	1311.34	4828.62
LADLIER	Q9QY17	Aldehyde dehydrogenase, mitochondrial	5078.93	11329.2	9599.98	4169.6	12723.1	5650.77	12779	10258.5	4325.3	12974.8	10869.7	14521.1	5675.1	8263.75	4418.74	12978
VVGNPFDSR	Q9QYC6	Aldehyde dehydrogenase, mitochondrial	7485.65	11869.4	9707.49	N/A	12089.7	N/A	13177.8	10841.5	3804.59	13875.9	10925.2	13312	5523.65	7679.26	N/A	10170.8
GYFIQPTVFGDVK	Q9QYF3	Aldehyde dehydrogenase, mitochondrial	3730.46	9741.49	7178.26	2279.55	11583.7	6636.38	12857	7955.57	2594.54	10329.5	7254.67	12040.7	5363.25	6546.86	N/A	11679.3
LQSLQLQPDK	Q9QYG8	Non-specific lipid-transfer protein	4558.14	4297.03	3654.73	3266.2	4510.05	2790.31	4068.71	5428.25	3087.96	3638.71	4752.05	4645.31	3113.53	3849.29	3866.39	4903.02
APIIAVTR	Q9QYH1	Pyruvate kinase PKM	3.7822e+06	5263447	3.87352e+06	4.46079e+06	4935272	5.35838e+06	4805124	5201570	5124512	4420621	4.22252e+06	5.29606e+06	6.14238e+06	5.13919e+06	5.88561e+06	5404110
GDYPLEAVR	Q9QYU4	Pyruvate kinase PKM	2822990	2.84871e+06	2.07343e+06	2477037	2.44011e+06	3.4066e+06	2959284	3.00166e+06	3.04535e+06	2.42297e+06	2641189	3.43004e+06	3.34987e+06	2.94489e+06	3.28688e+06	3327531
ITLDNAYMEK	Q9QZ81	Pyruvate kinase PKM	158672	371348	338920	374512	493481	301021	365644	310626	436266	359088	218655	326342	304277	380352	261886	272234
LLFEELAR	Q9QZ86	Pyruvate kinase PKM	202917	316745	290299	336691	345339	373716	351073	350739	329713	323895	283248	411503	385461	327088	366895	437241
VNLAMNVGK	Q9QZA2	Pyruvate kinase PKM	71905.3	37312.1	21538.1	22971.5	12422.9	46065	29999.2	29479.5	32033.4	27285	38651.1	30036.2	36924.8	37738.9	57611.3	43632.4
GVNLPGAAVDLPAVSEK	Q9QZM5	Pyruvate kinase PKM	256610	382444	400797	486044	435403	798793	422074	509004	512260	340083	433389	722443	587969	419297	706132	622682
GADYLVTEVENGGSLGSK	Q9QZM6	Pyruvate kinase PKM	137234	170233	127271	148724	166222	199556	155860	181539	137317	146490	134013	227690	202874	194323	191705	172373
GIFPVLCK	Q9QZR6	Pyruvate kinase PKM	221667	555120	401070	602328	624398	651874	567675	672070	688446	597212	522602	566444	733160	694588	555018	686854
IYVDDGLISLQVK	Q9R037	Pyruvate kinase PKM	267264	502465	211872	290419	181756	331656	358102	377066	360883	199546	245035	381842	270957	220703	376074	408405
NTGIICTIGPASR	Q9R063	Pyruvate kinase PKM	2.95449e+06	3.20403e+06	1.36899e+06	1.34828e+06	1.3618e+06	1.49332e+06	1.58159e+06	1.6662e+06	1.44429e+06	1245129	1.78256e+06	1.72607e+06	1.70714e+06	1.67763e+06	2139080	3.55989e+06
FGVEQDVDMVFASFIR	Q9R1N3	Pyruvate kinase PKM	7615.68	39641	39350.6	26090	58973.3	28218.4	32276.6	21766.4	32975.4	38443	21831.7	34244.9	30450.8	29762.3	37908.6	46137
DAVLDAWAEDVDLR	Q9R1R4	Pyruvate kinase PKM	209329	233198	19011.9	17575.6	9904.82	176311	113015	79273.9	96763	9756.06	96934.5	183040	182101	77531.9	126005	136997
LDIDSAPITAR	Q9R1Z0	Pyruvate kinase PKM	2.718e+06	3437822	1490402	1.49698e+06	1.77923e+06	1942848	3.52119e+06	2.04053e+06	1.82628e+06	1.38619e+06	1.75701e+06	4.28294e+06	3.89881e+06	1.73646e+06	4504580	3.95791e+06
KGVNLPGAAVDLPAVSEK	Q9WTP0	Pyruvate kinase PKM	328555	320847	305439	432018	516229	429984	358444	455324	484789	388361	400954	388361	463590	435467	415296	455093
AEGSDVANAVLDGADCIMLSGETAK	Q9WTQ2	Pyruvate kinase PKM	76884.5	112651	128921	115831	92243.8	188032	93262.2	84936.1	82120.7	96088.4	75601.1	106736	106822	73577.9	115579	142082
AATESFASDPILYRPVAVALDTK	Q9WTT2	Pyruvate kinase PKM	900781	1.08993e+06	1.3674e+06	1.26432e+06	1757554	1.3868e+06	1.22754e+06	1.48455e+06	1413285	1078913	1.62106e+06	1.87333e+06	1.69667e+06	1575348	1.71731e+06	1.66148e+06
CDENILWLDYK	Q9WTT7	Pyruvate kinase PKM	19124.7	9037.26	2685.64	N/A	N/A	6318.02	13050.4	9540.28	7113.95	1630.11	11940.5	13073	4827.21	6297.1	9556.66	10658.4
CLAAALIVLTESGR	Q9WTV0	Pyruvate kinase PKM	2763.96	280617	225185	N/A	N/A	61848.5	122358	54506.4	217891	317044	78939.1	94846.3	215564	N/A	154424	184701
RFDEILEASDGIMVAR	Q9WU34	Pyruvate kinase PKM	37192.4	103404	131129	57979.2	237032	41021.9	114624	96442.9	92242.7	90707.3	67973.7	188823	96099.4	79254.5	84885.3	73285.5
FDEILEASDGIMVAR	Q9WU61	Pyruvate kinase PKM	15067.9	77410.2	89626.9	47510	64087.5	86293.9	109837	117597	33817.7	37499.3	33437.5	96771.8	66179	78274.9	102961	90835.9
AGKPVICATQMLESMIK	Q9WU70	Pyruvate kinase PKM	32274.1	54479.6	43221	215602	109957	109904	53786.3	47496.1	74511.9	60225.2	35707.2	122142	46606.6	78955.3	44847	140087
ASSQSTDPLEAMAMGSVEASYK	Q9WU82	Pyruvate kinase PKM	747.042	3096.59	5604.98	12283	11430.8	3657.68	7267.92	1862.32	6474.82	4904.16	4575.29	2242.07	1759.12	6836.36	3794.23	5943.48
GTVLLSGPR	Q9WUC8	60S ribosomal protein L18	11592.5	17015.4	19235.3	13969	14848.8	14537.9	19346.1	15332.8	13934.6	14151	15376.1	15298.6	11135.6	22362.9	15024.3	23320.6
TNSTFNQVVLK	Q9WUH4	60S ribosomal protein L18	2456.26	1013.39	2438.13	1121.12	2074.95	1399.42	2516.12	1010.23	1592.51	1850.68	1418.74	768.043	N/A	2233.43	604.03	2531.63
TAVVVGTITDDVR	Q9WUJ3	60S ribosomal protein L18	7306.21	11400.7	10965.7	8411.96	10307.3	8282.14	15972.3	9597.54	10948.3	8554.69	9916.28	10388.2	5598.14	10847.8	8786.62	14737.8
ILTFDQLALESPK	Q9WUS0	60S ribosomal protein L18	2102.6	2344.84	3866.71	3799.92	3511.25	2864.74	3702.77	2559.32	3551.7	2888.89	2773.63	2746.26	N/A	3483.85	1496.24	3659.01
LYEIGGGTSEVR	Q9WV25	Isovaleryl-CoA dehydrogenase, mitochondrial	20572	26373	27688.9	24573	25744.7	26140.8	29347.2	25627.5	20460.4	25851.3	23949.5	29153.4	22152.1	24710.1	22868.4	30294.7
VPAANILSQESK	Q9WV63	Isovaleryl-CoA dehydrogenase, mitochondrial	3887.1	5142.24	4808.52	4241.45	5027.42	3499.2	5153.36	4632.35	3457.17	4243.62	4322.94	4462.13	4297.87	4811.1	4849.95	4913.86
GSNTCELVFEDCK	Q9WVB1	Isovaleryl-CoA dehydrogenase, mitochondrial	5986.16	4633.34	2440.06	2665.2	3083.9	3148.19	2611.57	2077.57	2530.11	3612.91	3299.1	3540.63	3689.68	3746.17	4275.43	3861.07
FVQENLAPK	Q9WVC0	Isovaleryl-CoA dehydrogenase, mitochondrial	8215.34	8516.86	7551.74	7084.44	7205.88	6291.41	7477.47	8485.82	6192.24	8337.23	8441.45	9452.37	7221.7	7601.43	7158.58	9288.42
EDPNLVPSVSNK	Q9WVE9	Cytochrome c oxidase subunit 5B, mitochondrial	12068.5	11294.3	12978.2	15709.4	11701.3	16794	12338.9	16218	13242.4	11553.1	15185.3	16566.9	15257.9	12007.3	19350.9	14317.5
TVLPADGPR	Q9WVK3	Serotransferrin	94814.9	107872	179348	78292	111105	123732	63009	107287	114842	59360.3	110705	159274	113253	93960.2	79550.6	96153.5
EGVCPEGSIDSAPVK	Q9WVK7	Serotransferrin	106158	102695	203627	73177.7	97359.2	120794	60771.2	86436.5	100013	54332.6	105968	137707	93417.9	84841.4	59699.8	84862.9
DSAFGLLR	Q9WVM4	Serotransferrin	64074.8	88666	151692	55628.5	80780	100929	54833.3	91213.3	79558.7	45157.5	90348.8	125763	98756.3	77060.2	58667.6	92809.6
GYYAVAVVK	Q9WVR6	Serotransferrin	94777.1	101053	128382	50091.7	108635	69390.8	50711.9	73491.7	95078.1	65986.9	72273.3	78774	88528.1	83242	42088.4	70306.9
KPVDQYEDCYLAR	Q9WVS2	Serotransferrin	58856.1	39926.8	62311.6	28170.3	41302.1	34985.4	24386.5	37550.8	38624.5	24374.4	39160.2	45428	37803	35819.2	23553.6	33520.3
DFQLFGSPLGK	Q9Z0J5	Serotransferrin	27498.2	57144.4	118871	54548.3	88783.5	123927	29316.3	48037.3	68188.8	39107.5	56947.1	99899.1	92155.8	66377.6	35327.6	54218.6
HTTIFEVLPQK	Q9Z0J8	Serotransferrin	26284.2	29236.9	60567.7	19796.9	35180.2	26919.8	22913.9	27395.3	32538.6	19293.5	31349.8	36233.5	28855.7	27467.1	15635.4	34240.7
LPEGTTYEEYLGAEYLQAVGNIR	Q9Z0V6	Serotransferrin	22217.9	19277.6	64103.1	14072.9	36386.9	21904.4	19592	32094.6	32182.6	15947.5	38426.7	48398.1	27126.6	24203.9	25282	36434.7
GTDFQLNQLQGK	Q9Z0W5	Serotransferrin	38552	35176	62163.3	26478.3	35187.1	35456.1	19823.8	34161.5	32937.7	19581.2	37419.5	47281.4	33705.3	31184.7	27383.2	31831.4
QEDFQLLCPDGTK	Q9Z1A5	Serotransferrin	16873.3	14040.2	25721.4	11397.9	14064.5	21068.5	9636.94	17092.2	13878.2	8381.29	18208.5	22187.3	16124.3	13073.7	12397.6	13390.8
LLEACTFHK	Q9Z1A6	Serotransferrin	11191.3	14858.4	21324.3	9203.45	14142.6	13072.5	7681	11701	11742.6	6898.18	14289.7	14410.4	12798.1	13030.8	8765.81	12493.7
ASDSSINWNNLK	Q9Z1B2	Serotransferrin	42611.8	35793.7	41681.9	11221.8	N/A	39483.2	35399.2	37325.9	42276.3	17833.4	44898.5	51426.5	30838.5	31960.4	33179.6	40865
SKDFQLFGSPLGK	Q9Z1M9	Serotransferrin	6109.12	8466.93	14833.5	11161	11181	10155.8	9515.85	12010.5	16545.1	9762.4	9109.37	17597.7	16068.1	14311.9	9098.51	15842.6
LYLGHSYVTAIR	Q9Z1N3	Serotransferrin	8516.4	15795.4	12907.3	7952.37	12235.1	8622.5	5798.03	11151.4	11168.3	7292.58	8845.4	5705.12	10439.7	19261.3	3128.58	6684.88
KGTDFQLNQLQGK	Q9Z1N4	Serotransferrin	14017.7	13581.2	13016.6	7441.99	6948.62	10393.6	8678.5	9942.13	11388.1	9160.82	6373.47	9891.93	9408.09	8988.04	4908.2	11480.1
GDKDCTGNFCLFR	Q9Z1P2	Serotransferrin	14617.7	19881.6	16860.3	9972.59	17974.4	12968.6	11065.5	16583.8	15008.6	10921.1	12039.7	9965.24	20308.5	16892.4	11726	17679.1
DLKQEDFQLLCPDGTK	Q9Z1W6	Serotransferrin	9212.51	23998.1	24928.3	19407.9	36035.4	25082	19002.6	24310.1	25963.3	16049.3	32384.8	35405.4	28072.4	23795	17314.7	24725.7
FDEFFSQGCAPGYK	Q9Z1X1	Serotransferrin	49056.3	58455.7	43693.8	37010	45716.2	56018.2	35926.8	49730.9	41414.8	27675.7	56800.9	67173.3	53504.1	45092.5	30696.6	54428.8
DQYELLCLDNTR	Q9Z1Y3	Serotransferrin	14318.9	13930.3	14949.2	14500	15632.1	34187.1	10415.7	17915.6	14236.1	9648.1	18313.1	31195.4	19830.6	16038	12021.7	18426.5
ADRDQYELLCLDNTR	Q9Z250	Serotransferrin	44813.2	37256.7	62718.3	19752.5	37397.1	27689.7	28458.6	40175.1	36425.3	23549.9	48047	50402.2	40948.8	34896.8	25180.1	36907.4
IVDVIGEK	Q9Z269	cAMP-dependent protein kinase type II-alpha regulatory subunit	51329.2	70638.9	68505.1	69680.7	74431	74107	73675.6	77770.9	69504.8	73060.5	60179.3	80982.9	77185.2	73522	74035.2	73744.1
GTYDILVTK	Q9Z270	cAMP-dependent protein kinase type II-alpha regulatory subunit	41041.5	41617.3	35696.3	31834	37277.1	41015.8	45993.5	41941.7	30456.7	37286.7	33515.2	46146.1	44001.8	40892.5	43923	44552.5
MFGSNLDLLDPGQ	Q9Z272	cAMP-dependent protein kinase type II-alpha regulatory subunit	3425.56	7934.76	16837.4	21827.1	40692.6	31179.3	8729.18	8439.56	13527.3	14951	7285.71	18175.2	18527.7	13116.2	14356.3	11760.5
TDEHVIDQGDDGDNFYVIER	Q9Z2F5	cAMP-dependent protein kinase type II-alpha regulatory subunit	13047.2	8328.32	8275.99	7881.57	9686.6	10969.7	12650.4	15603.8	4834.9	9230.15	10781.1	14624.6	11537.9	11277.7	13475	13998.6
NISHYEEQLVK	Q9Z2G8	cAMP-dependent protein kinase type II-alpha regulatory subunit	2719.97	1883.51	2066.32	2277.34	2166.84	1714.62	1528.75	2267.93	2328.67	2537.02	2765.66	2247	2504.91	2304.71	3067.55	2408.44
QQPPDLVDFAVEYFTR	Q9Z2L0	cAMP-dependent protein kinase type II-alpha regulatory subunit	173.514	920.267	999.384	785.608	N/A	N/A	915.806	463.925	634.391	1667.16	515.142	651.568	N/A	886.258	1569.96	1451.44
MFESFIESVPLFK	Q9Z2Q1	cAMP-dependent protein kinase type II-alpha regulatory subunit	1525.77	6309.52	11990	11272.9	27332.8	14365	N/A	5221.71	4759.33	14029.3	N/A	8068.78	7646.27	6398.23	5820.06	4957.66
GTFDIYVK	Q9Z339	cAMP-dependent protein kinase type II-beta regulatory subunit	4017.35	2868.53	4180.28	4291.55	3599.71	4282.01	3579.37	3465.16	3955.37	4323.45	2828.71	3861.61	3020.82	4019.56	2583.71	3497.29
EGEHVIDQGDDGDNFYVIDR	A0A0G2JUG7	cAMP-dependent protein kinase type II-beta regulatory subunit	3231.54	2755.41	645.297	1121.75	1697.65	N/A	1309.92	1013.97	N/A	2206.65	1806.07	1019.08	N/A	1071.91	1980.38	1852.85
EFGATECINPQDFSK	A0A0G2K2P5	Alcohol dehydrogenase class-3	10881	14516.1	10085.3	9766.93	10570.3	12433.7	11007.1	10187.2	7745.22	8825.35	11767.8	13073.5	11015.6	12409.5	11402.5	14450.1
VCLLGCGISTGYGAAVNTAK	A0A0G2K2P5	Alcohol dehydrogenase class-3	2424.46	3271.02	3076.04	2366.62	2474.08	2769.21	3617.7	2311.41	3510.12	2302.83	1997.77	3659.75	3729.89	2595.29	2398.85	3741.18
AGDTVIPLYIPQCGECK	A0JPJ7	Alcohol dehydrogenase class-3	5899.41	9060.27	8329.35	6356.17	9076.16	9123.52	7281.67	8055.93	4903.2	2670.4	7479.94	9337.07	8924.6	8178.38	8883.42	10550.1
VDEFVTGNLSFDQINK	A0JPJ7	Alcohol dehydrogenase class-3	5041.77	5291.82	5845.17	5973.41	4410.13	6208.66	5833.25	6997.27	3428.63	4946.26	5205.51	5719.11	5299.99	5810.86	5537.81	6539.82
FNPFVTSDR	A0JPJ7	60S ribosomal protein L26	9380.87	12662.1	16824.4	16107.7	12838.2	15107.3	12793.1	14397.6	12840.3	10529.8	14299.8	14336.3	12630.9	14308.9	15261.9	20041.8
YVIYIER	A1A5S1	60S ribosomal protein L26	11758.2	8202.37	9334.42	4803.46	8043	3871.25	10525.6	9047.4	9495.87	8820.1	10114.8	10726.5	9159.32	11876.6	10249.8	13289.6
TGTVPLEVR	A1A5S1	Fatty acid synthase	30068.8	28701	25202.7	28445.7	20327.8	31601.1	25225.2	30408	32663.6	23403.5	25571.8	31946.2	30796	23226.7	31527.4	22220.3
VAAAVDLITR	A2RUW1	Fatty acid synthase	15757.3	19432	13131.4	17763.1	13405.2	17173.7	11505.2	17038.4	17812.5	14861.3	12689.2	15852.7	18465.7	17193.2	17995.7	16112.9
QSLQLPTR	A4L9P7	Fatty acid synthase	12499.9	15188.1	14450.7	12105.4	10332.5	14800.7	15704.9	14917.6	15382.5	13248.3	14188.7	13641.1	15794	13426.8	16540	13162.5
QSPLLIGSTK	A4L9P7	Fatty acid synthase	9568.95	10586	8489.69	9654.23	6336.37	10576.4	9272.41	9826.98	10939.6	7583.43	8795.37	9528.63	11015	9193.38	9728.63	8174.1
EHDLVLPIR	A7VJC2	Fatty acid synthase	7210	9410.76	8924.5	8395.66	7442.94	8536.93	9282.65	9894.91	10027.5	8155.23	8314.3	10048.3	10024	8276.51	8253.63	8942.71
SLYQPGGVAPESLEYIEAHGTGTK	A7VJC2	Fatty acid synthase	4689.33	3119.12	3578.85	4136.99	2592.48	3060.78	3177.02	3066.99	4244.26	3370.59	4123.65	4199.77	4539.75	3837.92	5774.49	3050.9
QQEQLVPTLEK	A7VJC2	Fatty acid synthase	8978.75	N/A	9352.78	7848.55	6349.67	10613.8	10407	9096.04	9854.93	6208.91	10421.8	15427.6	10304.7	7844.94	14440.3	10144.4
VYATILNAGTNTDGCK	A7VJC2	Fatty acid synthase	4133.18	2943.17	2087.51	2310.83	1734.07	1653.78	1790.37	2658.85	2209.32	2432.06	3004.01	2126.68	N/A	1911.51	2025.36	1229.72
LLLPEDPLISGLLNSQALK	A7VJC2	Fatty acid synthase	265.301	2212.69	3488.94	4588.69	3545.25	3259.16	916.899	699.809	2275.41	2585.8	795.888	1787.33	1044.52	1870.41	1344.6	1666.86
GYDYGPHFQGVYEATLEGEQGK	A7VJC2	Fatty acid synthase	3628.35	2157.22	1696.72	1014.82	434.565	N/A	1607.19	1746.81	1887.15	1881.02	1813.89	2072.66	N/A	2177.61	2140.22	1445.98
AVAHILGIR	A7VJC2	Fatty acid synthase	N/A	3140.83	1423.95	1962.08	2180.96	N/A	1891.07	2226.44	2427.48	2256.37	2767.72	648.077	3055.76	2994.6	N/A	1748.18
SDEALKPLGVK	B0BN85	Fatty acid synthase	1396.62	2354.89	1024.27	1197.95	677.679	1953.11	1236.08	2404.42	1013.99	1052.28	1289.45	1342.72	2099.56	1849.45	1968.86	1657.17
VTAIYIDPATHLQK	B0BN93	Fatty acid synthase	7274.12	2857.62	2733.14	5075.15	5831.38	4421.63	5631.79	4669	3896.57	6100.01	2943.79	4513.19	6438.31	2493.76	4474.7	4937.51
EQGVTFPSGEAQEQLIR	B0BN93	Fatty acid synthase	6615.67	6872.53	2002.19	5369.91	4415.24	6526.77	5616.3	5609.52	4067.72	4401.75	5417.98	6406.02	6493.22	5902.89	7032.34	5623.79
GVDLVLNSLAEEK	B0BN93	Fatty acid synthase	7084.2	7734.3	8614.91	9468.9	6605.07	13883.9	8108.6	7922.98	10680.7	6176.15	7060.4	10502.2	9917.38	6584.04	9729.02	6868.01
AGLYGLPK	B0BNA5	Fatty acid synthase	10974.3	8193.48	8118.14	7959.57	6576.42	9254.39	8483.59	8686.8	9055.19	7127.78	8327.5	8948.17	11493.7	6839.05	8935.43	8349.59
ACIDTALENLSTLK	B0BNE5	Fatty acid synthase	2561.26	3227.44	2619.73	4034.13	2353.37	4267.89	3030.08	3670.15	4454.12	2684.66	3715.19	3058.81	4203.39	3332.52	4132.91	3464.31
DNLEFFLTNLGK	B0BNE5	Fatty acid synthase	657.616	1400	1908.27	1864.38	631.621	2458.4	690.949	746.551	951.633	1463.83	1114.65	1481.51	1595.08	1507.48	1401.16	1009.57
YHGNVILLR	B0BNE5	Fatty acid synthase	5852.19	11008.5	8089.22	8450.45	9074.05	6092.88	10037.6	8767.67	11640.9	10471.6	8552.05	9007.23	12973.1	10375.3	8771.79	8114.77
VLEALLPLK	B0BNE5	Fatty acid synthase	3088.11	4866.1	4258.54	5499.91	5537.3	7142.47	3852.76	3588.02	6162.53	3263.99	2926.46	4207.02	5701.55	3333.19	4404.88	3006.23
RQQEQLVPTLEK	B0BNE5	Fatty acid synthase	3696.42	3611.68	4715.99	4237.11	5470.93	3479.72	4223.28	3717.2	4524.47	5123.84	3305.9	2844.32	4739.64	3871.95	2722.96	2291.62
FPQLDDTSFANSR	B0BNF1	Fatty acid synthase	2842.96	2947.08	4170.9	3869.91	3139.06	4130.38	4357.39	3075.7	4973.61	3739.06	3765.47	3540.16	3055.7	3557.98	3222.53	2083.5
AEAVVAVLLTK	B0K020	Fatty acid synthase	5692.68	7823.86	5757.68	3938.19	3747.75	N/A	7127.29	8068.14	6247.71	5619.56	5528.03	6135.91	8041.88	6363.35	5770.76	6672.33
SYIITGGLGGFGLELAR	B0K020	Fatty acid synthase	1831.26	3592.36	1412.91	1388.68	870.652	1062.52	1401.82	1800.79	2189.88	2063.68	1283.47	1662.72	3472.83	2364.95	1289.96	1231.47
LQVVDRPLPVR	B1WC61	Fatty acid synthase	3644.94	N/A	3424.52	4416.72	3297.65	3535.04	3101.88	4398.56	4522.28	5757.66	4038.24	N/A	3605.17	2702.51	2854.67	N/A
LFDHPEVPIPAESESVSR	B1WC61	Fatty acid synthase	11939.8	9565.69	14205.7	15122.7	13317.3	17206	16285.6	15298.3	16751.3	11755.6	12267.7	20242.8	16475.4	13561.2	19094.2	15230.6
TMEAVQGLLEQGR	B1WC61	Fatty acid synthase	1838.73	3638.3	3619.95	3750.5	3934.8	3233.24	2380.93	2969.74	5041.69	2495	2641.11	3169.25	2641.44	2970.37	1995.49	1530.52
DTSFEQHVLLHTGGK	B1WC61	Fatty acid synthase	2382.52	4526.95	1514.61	1338.41	1299.39	N/A	1549.23	1285.33	1587.46	1812.2	2324.78	N/A	2609.18	1437.63	1339.2	457.086
SNMGHPEPASGLAALTK	B1WC61	Fatty acid synthase	1967.46	3744.82	2407.47	3472.36	3152.04	1829.55	2736.13	2186.24	3140.97	2910.34	1552.79	911.937	1205.18	2550.1	673.096	2042.06
VTLATLK	B1WC61	Nucleophosmin	12298.9	11458.5	13534.5	15518.8	11810.7	17500.7	13127.2	13012.8	14611.7	10328.8	15942.3	16972.5	17865.7	15339.3	17284.8	17374.1
MSVQPTVSLGGFEITPPVVLR	B2GUZ5	Nucleophosmin	2048.46	6387.12	12765.1	24000.6	36287.8	23305.8	4960.83	5220.01	14823.9	15444.8	7443.29	10882.7	13598.7	12533.8	10076	8200.2
DELHIVEAEAMNYEGSPIK	B2GUZ5	Nucleophosmin	821.943	672.599	1275.62	2261.63	1817.18	2077.38	N/A	915.842	1209.19	1121.9	1429.22	849.899	775.826	1337.81	526.116	1081.82
LIGPNCPGIINPGECK	B2GV06	Succinate--CoA ligase [ADP/GDP-forming] subunit alpha, mitochondrial	17452	20836.1	10338.9	9619.43	16589.7	18171.9	16576.6	20282.4	8854.3	7864.96	11319.4	17699.2	10699.9	17122.4	21792.3	23656.3
QGTFHSQQALEYGTK	B2GV06	Succinate--CoA ligase [ADP/GDP-forming] subunit alpha, mitochondrial	8727.54	4422.06	6727.15	6332.86	3922.55	8632.76	7655.29	8232.13	6473.92	6498.48	3545.9	8668.53	7839.27	4900.11	5637.88	11610.6
AKPVVSFIAGITAPPGR	B2GV06	Succinate--CoA ligase [ADP/GDP-forming] subunit alpha, mitochondrial	2705.99	13254.8	5449.14	7542.31	17074.7	5279.23	5523.08	5549.59	11195.8	12571.1	4332.78	N/A	16010	15059.8	2333.31	N/A
VNLGVGAYR	B2GV06	Aspartate aminotransferase, cytoplasmic	168186	180207	151521	168253	177971	201293	165375	177250	177309	190763	150479	158975	204469	183629	180638	184142
IGADFLGR	B2GV22	Aspartate aminotransferase, cytoplasmic	170302	184371	138866	136236	149826	171187	152350	186636	156174	140565	157991	186683	187085	175905	182430	183433
NFGLYNER	B2GV54	Aspartate aminotransferase, cytoplasmic	126996	115714	97951	95468	101405	105610	102257	116317	93942.8	101827	109087	110541	108666	114497	123350	112861
VGNLTVVGK	B2GV54	Aspartate aminotransferase, cytoplasmic	109633	107414	113670	102893	105066	107241	116605	113787	116235	88375.2	98861.2	127187	115976	110223	124970	130667
NLDYVATSINEAVTK	B2RYG6	Aspartate aminotransferase, cytoplasmic	14035.6	14446.6	12388.8	12843.2	13865.3	15109.6	12787.2	14771.3	12310.5	11569	12538.3	16282	14624.4	14150.6	17051.5	14193.1
KVNLGVGAYR	B2RYG6	Aspartate aminotransferase, cytoplasmic	3016.19	8669.52	5864.91	8305.01	8460.89	8981.12	6081.51	5702.1	8351.93	6292.8	5286.15	4853.08	9949.85	10442.8	3628.15	6276.53
QVEYLVNEK	B2RYW9	Aspartate aminotransferase, cytoplasmic	3946.46	N/A	3620.1	3880.93	3360.14	7661.84	4282.54	5664.62	3476.9	2651.74	6332.54	6454.69	4928.25	5123.59	5187.26	5186.02
SCASQLVLGDNSPALR	B2RYW9	Aspartate aminotransferase, cytoplasmic	82616.5	132049	99061.6	94521.3	108175	126515	111771	117831	94841	90957.4	116646	131439	113191	108613	129068	122159
APPSFFAQVPQAPPVLVFK	B2RYW9	Aspartate aminotransferase, cytoplasmic	11269.4	114565	76847.6	129825	334456	156519	26789.5	28171.7	88272.3	125769	45232	57665.2	142121	120065	56115.1	59645.7
VGGVQSLGGTGALR	B2RZ78	Aspartate aminotransferase, cytoplasmic	435724	413989	223505	179304	208586	445272	193460	446418	193368	349215	426605	449444	415388	451723	494604	474938
IVATTLSNPELFK	B2RZ78	Aspartate aminotransferase, cytoplasmic	129530	210104	195307	206892	207947	287369	176132	206303	99631.8	168057	176480	237820	242903	213908	240291	254122
TDDSQPWVLPVVR	B3GNI6	Aspartate aminotransferase, cytoplasmic	49202.6	48375.1	24286.3	9330.57	10517.8	47924.1	50311.3	41353	34219	16080.8	51642.3	53841.5	32679.7	35514.1	52458.6	59265.4
ITWSNPPAQGAR	B3GNI6	Aspartate aminotransferase, cytoplasmic	124926	47845.5	14831.1	5658.13	4512.1	23294.3	35239.5	32096.9	25759.2	11619.4	44604.4	28818	16084.2	24871.6	32258.6	41758.3
HIYLMPSGR	B3GNI6	Aspartate aminotransferase, cytoplasmic	2445.34	5082.22	5289.41	6359.26	10022.3	5639.19	N/A	3590.9	7632.65	4503.84	2245.49	5238.51	5676.73	7470.48	2877.27	6245.22
INMCGLTTK	B3GNI6	Aspartate aminotransferase, cytoplasmic	11800.4	4968.15	3160.61	2600.39	N/A	4160.67	2916.49	3263.07	2256.32	2656.99	6591.21	3143.09	3123.89	3524.45	6034.98	3865.34
ATGAEEYAQQDVVR	B3GNI6	2',3'-cyclic-nucleotide 3'-phosphodiesterase	3163.87	2472.57	1290.66	1786.05	1568.4	2557.35	1844.92	1855.92	1621.99	1915.28	1903.8	1815.71	2089.85	2180.93	1781.03	1693.39
NFAIGYYLK	B3GNI6	Glutaminase kidney isoform, mitochondrial	8756.41	8721.17	5331.17	5186.88	9895.11	5118.1	4137.36	6425.88	7786.84	8776.69	5192.07	5010.12	11574.8	8583.06	6095.9	5635.05
YAIAVNDLGTEYVHR	B3GNI6	Glutaminase kidney isoform, mitochondrial	9413.76	7430.95	5137.36	5596.72	7637.71	10453.4	7003.19	8518.7	6559.66	7270.65	6504.96	6857.29	9104.65	7888.27	8090.92	7715.54
VADYIPQLAK	B4F777	Glutaminase kidney isoform, mitochondrial	57317.3	49452.7	50110.7	44550.8	59078.5	68533.1	59655.2	66508.9	51153	50252.2	55803.1	67663.7	64263	55460.2	75940.8	64987.2
LTLQTTSDGVMLDK	B4F777	Glutaminase kidney isoform, mitochondrial	1114.77	2641.07	2975.97	5429.6	4417.36	4773.93	2563.26	2921.83	4062.95	3398.34	1999.4	2210.64	2193.39	3471.79	1866.58	1619.32
FDYVMQFLNK	B5DEH2	Glutaminase kidney isoform, mitochondrial	814.581	1534.35	1345.65	2773.78	4059.96	1219.02	1454.18	1900.07	2768.23	2512.61	812.281	996.169	1216.84	2343.91	N/A	833.962
CVQSNIVLLTQAFR	B5DEH2	Glutaminase kidney isoform, mitochondrial	969.293	2384.6	529.012	783.487	1774.44	N/A	587.097	1238.7	1671.57	1125	943.269	N/A	2522.1	1707.36	N/A	482.606
MAGNEYVGFSNATFQSER	B5DEH2	Glutaminase kidney isoform, mitochondrial	2386.4	5233.31	2597.12	2092.86	3915.89	N/A	2655.9	2237.2	2330.02	2987.11	2062.77	1930.55	1917	2880.26	4046.25	2793.13
EVFEDAVEIR	B5DEH2	Nucleolin	73592.5	70871.4	80606.7	91255.5	62085	85600.5	80404.1	107763	96958.1	63106.2	75869.2	119505	88738	80730	99825.7	90171.7
NDLAAVDVR	B5DEH2	Nucleolin	96198.9	74536.2	75239.6	78616.4	74960.6	81625.7	70913.2	99379.7	109725	69415.5	74633.7	102821	89178.7	85847.8	81248.3	78678.8
SVSLYYTGEK	B5DEH2	Nucleolin	93927	79974.5	72582.9	78236.3	75916.3	83413.8	73268.5	100893	102629	70970.5	84863	83830.6	101896	84947.1	101550	85237.7
GLSEDTTEETLK	B5DF89	Nucleolin	65779.8	65705.1	52062.6	66500.8	54545.7	72571.2	62804.9	77197.4	90678.5	47637.1	59830.7	87825	82027.8	65703.8	70539.8	60518.2
ALVPTPGK	B5DF89	Nucleolin	58236.7	48546.2	51085.5	56643	51922	58785.9	50962.6	58204.6	71861.7	47314	45745.8	67706.7	60909.4	52953.7	59926	54510.4
VAISELFAK	B5DF89	Nucleolin	30173.1	45348.6	42405	42042.6	52735.3	48829.3	44786.5	62553.7	69897.4	42929.7	44321.8	68936.2	64115.7	51541.5	56297.9	56641.8
IEGSEPTTPFNLFIGNLNPNK	B5DF89	Nucleolin	9306.89	11243.6	40761.7	49881.8	94268.8	56178.8	13712	16094.3	46041.8	32828.3	24896.7	44506.1	42974.7	34294.5	27945.1	22428.9
NLSFNITEDELK	B5DF89	Nucleolin	28455.4	26959.6	33866.6	36688.7	24324.6	40263.7	35878.2	42367.6	38010.2	23834.3	31121.7	50156.4	32378.4	31739.3	42848.4	36849.8
FGYVDFESAEDLEK	B5DF91	Nucleolin	22090.6	20154.9	18428.3	23416.9	18830	36697.2	23941.5	32595	24885.1	17578.1	18726	41280.1	29534.7	24763.2	28181.2	27239.1
GFGFVDFNSEEDAK	B5DF91	Nucleolin	15656.8	14055.4	16576.4	17290.2	17413.3	20426	16020.3	20785.6	20843.5	12614	16612.9	26503.2	18873.5	17944.6	17677.2	22239.5
TLVLSNLSYSATEETLQEVFEK	B5DF91	Nucleolin	1453.41	1381.32	1388.54	610.376	852.082	N/A	2240.44	2104.98	2136.7	804.635	1586.14	2787.98	1874.99	1392.53	2745.71	1701.87
ALELTGLK	B5DFC8	Nucleolin	81972.2	60601.9	59572.5	68232.6	64007.2	72954.6	62155.4	82647.1	98005.4	52859.4	56236.5	82603.5	77050.7	70736.6	67026.4	74587.8
GIAYIEFK	B5DFC8	Nucleolin	52654.3	45166.6	40467.7	41038.5	46549.9	38084.1	43080.6	55915.3	56632	40484.6	38973.3	55163.8	58021.2	52049.5	52734	51664.6
VTLDWAKPK	B5DFC8	Nucleolin	5713.74	3227.33	1321.48	581.834	443.338	1574.95	2675.14	2917.34	3999.59	1093.41	3676.49	2739	1825.42	2808.49	2186.27	3159.04
GYAFIEFASFEDAK	B5DFC8	Nucleolin	13019.9	9679.07	10544.8	2180.99	4460.3	1917.03	13215.6	21216.1	7496.7	6624.05	10923.6	11756	10940.7	10899.8	12343.3	12833.8
KFGYVDFESAEDLEK	B5DFN2	Nucleolin	5703.05	4024.19	4585.27	3469.65	3753.21	2521.55	4497.83	5183.84	4736.7	4637.25	4589.2	4054.94	2886.35	4025.63	2306.41	2564.13
ELGITALHIK	B5DFN2	40S ribosomal protein S14	1657.02	3371.98	2957.03	1710.55	3192.93	1935.87	2659.54	2470.74	2466.53	1517.91	2964.28	3301.81	3318.92	3975.05	2811.69	2866.64
IEDVTPIPSDSTR	B5DFN2	40S ribosomal protein S14	25308.8	18628.5	21278.3	22756.6	18051.3	21429.4	18586.6	22151.2	19266.6	15205.8	21654.3	23931.8	17648	21040.5	20936.1	24158.6
DESKEPIVEVR	B5DFN2	Neural cell adhesion molecule 1	90032	83697.4	80345.2	96306	78364.6	98419.2	114780	106461	97348.7	85734.8	85863.7	124619	105751	94538.2	113796	93179.6
AAHFVFR	B5DFN2	Neural cell adhesion molecule 1	24417.3	42872.1	35853.1	43420.8	31327.8	49215.5	33604.6	41234.3	51256.3	43231.1	32475.3	38537.6	53220	36809.1	41328.8	36997
SEPQESEAKPAPTEVK	B5DFN2	Neural cell adhesion molecule 1	4306.48	3533.04	4730.2	6796.53	4932.15	8120.02	12568.6	3793.03	3146.02	5013.39	2677.28	5670.94	10149.8	4872.68	10690.1	3988.16
NDEAEYVCIAENK	B5DFN2	Neural cell adhesion molecule 1	8057.12	3420.07	4986.98	7024.43	3857.62	9840.78	5790.92	6852.63	3979.75	6825.49	6679.4	7471.58	5989.82	3378.22	8314.26	6053.4
CVVTAEDGTQSEATVNVK	B5DFN2	Neural cell adhesion molecule 1	28217.8	24609.7	23094.6	22383.5	18956.9	24986.3	26920.7	27015.4	19325.2	26013.8	25764.6	34027.6	29921.1	22849.9	30833	26329.1
HTEPNETTPLTEPEK	B5DFN2	Neural cell adhesion molecule 1	6120.65	4295.55	4156.26	6378.67	3655.93	7593.32	6033.71	6207.28	3704.49	5210.32	5051.56	8826.81	5940.88	4442.02	7080.31	4839.17
HIFSDDSSELTIR	D2XV59	Neural cell adhesion molecule 1	22623	18861.5	18974.6	25518.3	18380.4	26833	25322.6	30456.1	20724.2	31995.5	21149.1	30618.6	26162.2	22693.6	29298.1	26829
SLGEEAWHSK	D2XV59	Neural cell adhesion molecule 1	23909	6807.53	2628.41	1046.2	1035.97	6053	8242.03	6581.83	6713.02	2452.03	7071.34	7506.62	5793.28	5242.69	8347.89	8449.84
DIQVIVNVPPTVQAR	D2XV59	Neural cell adhesion molecule 1	134037	253767	104270	174048	129674	291745	129768	147874	172083	124736	103441	163131	221699	177189	170803	269886
ALASEWKPEIR	D2XV59	Neural cell adhesion molecule 1	70297.3	26605.6	8980.79	8423.9	6411.28	14413.3	27647.4	18687.5	22497.2	17055.8	23954.3	22220.1	12283.9	14472.5	20745.9	23314.9
HTEPNETTPLTEPEKGPVETK	D3ZAA9	Neural cell adhesion molecule 1	1520.57	3326.74	1428.62	1658.17	2682.78	2051.56	2308.44	2174.63	1795.38	2263.8	2075.92	2691.84	2969.24	4552.67	1885.35	1693.04
IGQESLEFILVQADTPSSPSIDR	D3ZAA9	Neural cell adhesion molecule 1	19711.6	43524.5	36930.1	34570.7	60282.1	76150.7	34888.9	24325.6	34058.2	26381.6	21182.6	100012	53840.6	37330.6	61292.6	61750.5
NVDKNDEAEYVCIAENK	D3ZAA9	Neural cell adhesion molecule 1	260464	114585	95106.5	102011	178173	135508	102535	135019	110133	95775.8	120759	149469	136715	102148	133653	103351
LPSGSDHVMLK	D3ZAA9	Neural cell adhesion molecule 1	6730.98	12807	14901.8	15653.7	14694	17165.1	17546.7	14602	18661.9	14514.4	7868.86	18463.9	14367.9	17408.8	10817.8	12305.3
DGEPIENEEEDDEKHIFSDDSSELTIR	D3ZAA9	Neural cell adhesion molecule 1	16454.9	22173.2	5043.35	8509.74	10906.6	10612.4	10585.8	14023.2	N/A	6469.99	13054	17598.4	14122.9	13418.8	18298.1	16486.7
GLGEISAATEFK	D3ZAA9	Neural cell adhesion molecule 1	397814	357119	370265	449792	336211	592588	478711	460826	474639	351331	409658	567717	531789	408210	518822	462417
FFLCQVAGDAK	D3ZAA9	Neural cell adhesion molecule 1	139085	177884	154736	165483	149528	202470	201750	194852	179415	159005	180073	215158	212249	176251	218794	210007
FIVLSNNYLQIR	D3ZAA9	Neural cell adhesion molecule 1	20024.7	76694.3	31456.6	30522.6	33910.1	17709.8	31183.2	48097.4	58553.1	64888.6	25897.1	23825.1	98817	65956.8	18539.8	28304.6
DKDISWFSPNGEK	D3ZAA9	Neural cell adhesion molecule 1	18148.7	14662.4	7347.71	N/A	4371.93	10648.9	15285.5	12607.5	13507	6822.44	13498.1	15471.6	9469.09	12103.4	13183.5	15123
QETLDGHMVVR	D3ZAA9	Neural cell adhesion molecule 1	N/A	1580.84	2955.71	2537.32	1680.87	1121.64	1955.46	1985.81	2060.43	1082.43	1539.8	1764.89	N/A	2249.15	1796.3	1003.22
VEPYSSTAQVQFDEPEATGGVPILK	D3ZAA9	Neural cell adhesion molecule 1	99941	155287	99658	279224	213531	547221	210856	249839	241285	173138	206353	371192	274588	192606	291159	254498
EANMEGIVTIMGLKPETR	D3ZAA9	Neural cell adhesion molecule 1	2496.62	11373.2	44071.5	33704.5	55140.9	33802.6	47471.2	19083.1	36102.1	33962.4	10020.4	25912.4	19169.3	23751.7	11452.5	14568.5
VFFEQGATR	D3ZAA9	Ceruloplasmin	16134.3	15477.9	20138.3	29104.2	17714.9	21357.1	18375.1	17754.5	17825.1	16417.7	24144.6	18013.5	17558.3	19932.5	22488.4	20773.6
DLYSGLIGPLIVCR	D3ZAA9	Ceruloplasmin	446.534	9849.63	7502.88	10547.9	14610.5	17048.5	1465.14	2503.99	8577.68	3386.11	6781.84	7740.05	14414.3	7944.39	2773.84	6999.78
GQFEDVTLYQGER	D3ZAA9	Ceruloplasmin	7479.82	5834.6	3613.22	5492.59	5370.07	7840.13	7787.72	5363.8	5530.38	3952.12	8409.26	7020.49	5740.37	7147.72	7106.72	7878.87
DIASGLIGPLILCK	D3ZD32	Ceruloplasmin	1666.2	10928.5	9784.61	11473.8	24584.2	18731	4159.64	3385.17	9539.83	9460.33	6848.38	10117.7	18336.4	12363.3	8883.25	7837.33
SSTVAPTLPGEVR	D3ZD32	Ceruloplasmin	34571.6	25913.6	35542.3	51203.9	28339.9	36497.3	40387.4	32840.9	34508.3	28087.9	41597.7	40800.5	33345.4	36808.3	41856	45342.7
ALYSEYTDGTFTK	D3ZD32	Ceruloplasmin	4992.8	5283.14	5443.31	10758.3	5227.58	7992.63	7164.88	5604.12	5079.79	5534.36	6925.11	6633.67	4909.34	6526.47	6235.12	5980.38
DIFTGLIGPMK	D3ZD32	Ceruloplasmin	310.176	1924.66	4106.24	9218.42	6910.62	5886.13	2744.47	1487.73	5243.89	3418.38	1878.53	3068.76	2239.07	4149.23	1632.87	2447.6
MYYSGVDLTK	D3ZD32	Ceruloplasmin	N/A	3575.53	6799.55	9699.3	7083.56	5564.04	5190.67	4062.57	6465.05	4428.11	5064.96	5208.63	4626.59	5321.72	3133.02	4299.02
EMGPTYADPVCLSK	D3ZDK7	Ceruloplasmin	N/A	3335.74	4968.5	6897.2	4617.58	3316.12	5305.32	3420.13	4729.03	3051.67	3485.78	4098.36	3315.6	4956.66	2920.47	N/A
ELISVDTEQSNFYLR	D3ZHV2	Ceruloplasmin	1725.79	1669.7	2390.28	2901.11	770.38	1734.11	2170.17	1930.62	1240.96	1504.02	3169.41	1969.5	1592.26	1935.99	2207.05	2096.47
INAANIATDDER	D3ZHV2	Sodium/potassium-transporting ATPase subunit beta-2	191922	132172	140400	172149	153887	215099	179540	215462	159247	131963	161683	224004	143459	137395	238430	186945
EFVWNPR	D3ZHV2	Sodium/potassium-transporting ATPase subunit beta-2	224663	116583	36977.5	15497.7	18334.2	53948.7	109697	85852.4	66459.8	34959.5	105664	84048.3	55042.4	78875.6	91600.6	102220
INAANIATDDERDK	D3ZHV2	Sodium/potassium-transporting ATPase subunit beta-2	3544.59	5901.49	5393.67	3187.14	5485.99	2625.26	4698.93	3454.78	6709.83	4124.35	4180.55	5227.21	5949.59	6349.41	2847.69	4022.95
SCGQVVEEWK	D3ZHV2	Sodium/potassium-transporting ATPase subunit beta-2	60873.1	21499.6	7419.48	3627.06	N/A	14490.6	26700.2	20227.2	17395.9	6020.52	24658.6	21700.6	11733.8	13220.2	19935.9	23805.3
FLNVTPNVEVNVECR	D3ZHV2	Sodium/potassium-transporting ATPase subunit beta-2	6161.89	8492.31	6670.36	4987.99	5399.53	13500.3	5134.47	12054.2	6082.73	3824.36	7775.83	9994.7	9522.88	8797.98	12189.5	11333.2
SFNLSALEK	D3ZHV2	Acylamino-acid-releasing enzyme	3315.99	2942.54	4364.25	3254.54	4016.34	2868.87	2233.6	N/A	3461.16	3408.69	3682.9	3670.89	3957.03	3662.41	N/A	3849.28
VGFLPPPGK	D3ZHV2	Acylamino-acid-releasing enzyme	19968.6	N/A	24174.6	28620.5	30193	24542.7	27863.3	N/A	30569.3	N/A	26544.4	32975	13073.9	29320.7	N/A	33331.2
GSTGFGQDSILSLPGNVGHQDVK	D3ZLZ7	Acylamino-acid-releasing enzyme	2818.88	3855.18	2415.65	2880.89	N/A	2785.62	3259.39	N/A	3446.91	2410.94	N/A	3618.59	N/A	2503.24	4037.52	3475.49
QVLLSEPQEAAALYR	D3ZLZ7	Acylamino-acid-releasing enzyme	3083.44	4287.13	2926.81	2976.52	3144.33	N/A	2519.7	2834.59	2480.61	2615.45	3613.67	2810.05	4166.36	3153.31	3905.64	4141.23
VTSVVVDIVPR	D3ZLZ7	Acylamino-acid-releasing enzyme	4250.42	N/A	3143.06	3254.32	2789.1	2329.84	2612.91	2681.3	3951.56	3430.22	3263.8	2696.04	3262.58	4070.78	2639.89	3101.25
TPVLLMLGQEDR	D3ZLZ7	Acylamino-acid-releasing enzyme	479.245	643.08	2072.42	2466.06	2214.53	856.772	866.628	N/A	N/A	1642.26	997.206	1481.84	890.936	1310.36	N/A	1666.78
AIFASGSPFDPVTLPDGR	D3ZLZ7	NADP-dependent malic enzyme	1508.89	3300.01	2691.27	2601.01	3414.74	3162.07	N/A	2325.61	2254.72	1174.46	2246.4	2888.97	2166.75	2869.07	2248.34	2520.39
TIYAGNALCTVK	D3ZLZ7	Electron transfer flavoprotein subunit alpha, mitochondrial	N/A	11136.3	10787.9	7277.34	9003.22	8100.61	10300	8799.88	7310.59	10275.6	10878.4	12323.6	8833.37	9836.43	10143.3	8962.25
GLLPEELTPLILETQK	D3ZLZ7	Electron transfer flavoprotein subunit alpha, mitochondrial	324.978	2376.21	1512.52	2558.69	3624.05	2973.85	761.175	673.143	932.581	1286.45	1014.73	1817.67	1408.44	1038.81	1421.89	1263.93
LGGEVSCLVAGTK	D3ZLZ7	Electron transfer flavoprotein subunit alpha, mitochondrial	6763.5	7776.64	7572.75	7168.54	9434.91	7855.86	8743.32	8411.69	6623.71	7704.08	7899.83	8617.03	6415.95	8469.81	7472.42	8972.58
LNVAPVSDIIEIK	D3ZLZ7	Electron transfer flavoprotein subunit alpha, mitochondrial	5262.63	5790.89	6531.66	5833.32	7392.25	9978.2	5797.19	6127.62	5210.12	5622.33	5902.55	8492.37	6649.26	7285.81	7121.37	7884.65
AAAEVNQEYGLDPK	D3ZLZ7	Fumarate hydratase, mitochondrial	14858	9893.87	8796.14	8330.04	10083	11991.1	10793.4	10956.3	7345.7	9523.64	10808.1	12365.3	11344.7	10107.7	10582.7	11404.1
IEYDTFGELK	D3ZLZ7	Fumarate hydratase, mitochondrial	12601.9	16617.9	14475.6	15951.5	17430.2	16207.2	19244	18920.5	14156.4	15911.8	14405.7	18487.6	19793.4	16278.2	16971.9	18418.3
IYELAAGGTAVGTGLNTR	D3ZLZ7	Fumarate hydratase, mitochondrial	6089.82	9586.95	5623.85	4262.99	4943.13	8333.3	5368.2	5415.23	3903	6118.01	5161.56	7665.45	6416	4895.03	6879.02	6427.28
VAALTGLPFVTAPNK	D3ZLZ7	Fumarate hydratase, mitochondrial	8375.76	20837.6	16153.1	28402	28038.8	39974.4	13275.6	16240	22788.1	18016.6	12136.3	21816.3	29355.9	23325	18632.5	17372.4
SGLGELILPENEPGSSIMPGK	D3ZQG6	Fumarate hydratase, mitochondrial	692.423	4925.28	3829.89	4762.79	6324.29	5507	3524.41	3009.13	3763.37	3566.29	1976.87	4032.49	2849.27	3942.34	1800.04	3438.59
YSGTCGAQLVTLK	D3ZQL7	Lysosome-associated membrane glycoprotein 1	5567.78	2267.97	3058.93	2775.09	2834.9	2831.7	3290.01	3283.54	2302.7	2933.82	3756.49	3833.16	3470.12	3269.85	3542.25	2293.31
AQFGQPEILLGTIPGAGGTQR	D3ZQL7	Enoyl-CoA hydratase, mitochondrial	1172.3	2939.62	2388.53	3174.77	3240.48	4347.69	2873.47	2268.6	2665.65	2035.6	1806	N/A	2183.01	1986.27	1531.2	1781.6
DAGTITGLNVLR	D3ZRC4	Heat shock-related 70 kDa protein 2	3546.96	4910.7	4956.51	7089.36	5469.58	5636.47	5119.41	5781.04	4556.76	4185.14	5530.46	7105.46	5411.1	4856.94	4739.45	5151.44
GQIQEIVLVGGSTR	D4ABY2	Heat shock-related 70 kDa protein 2	1788.89	1212.65	1434.96	1696.52	1365.41	N/A	1331.12	917.169	990.573	1473.6	1641.01	N/A	N/A	1273.63	1108.46	1585.09
GTVTDFSGFDGR	D4ABY2	Annexin A5	10004.1	14396.4	12067.4	7456.67	10510.8	8204.73	9726.72	10819.8	5205.53	8278.5	11660.8	12498.2	7690.6	9660.69	6832.09	10529.2
VLTEIIASR	E9PU28	Annexin A5	205312	232798	200865	183196	210265	196078	247402	267272	N/A	196406	200679	241223	204878	235249	206368	311457
FITILGTR	E9PU28	Annexin A5	3675.35	8699.63	6363.91	4922.7	8341.1	N/A	6189.03	6954.61	3961.69	6256.86	6888.05	8052.7	5539.81	8076.71	4049.29	7762.79
GLGTDEDSILNLLTAR	E9PU28	Annexin A5	1202.28	9932.51	7809.43	5220.79	12450.1	5336.95	4744.73	4958.55	2241.29	2748.1	5590.26	11485.7	5011.57	6259.87	5207.19	8215.03
ETSGNLENLLLAVVK	E9PU28	Annexin A5	183.509	1111.36	1346.44	698.15	1091.5	N/A	254.456	401.418	478.277	473.11	929.438	951.428	533.868	1331.11	272.695	1047.36
SEIDLFNIR	E9PU28	Annexin A5	4391.08	14483.5	10812.6	5977.6	9440.3	5031.27	8726.89	10091.5	4026.36	6869.94	9603.02	11940.2	6003.17	9064.54	4701.62	11250.6
NTPAFLAGR	F1LMZ8	Annexin A3	4189.95	3458.33	4366.66	5159.93	N/A	4519.29	2846.72	4262.91	N/A	4326.89	3749.79	4388.58	3174.88	3448.59	5407.95	4117
LLGAPQEADASEEGVQR	F1LMZ8	Cystatin-C	7198.23	7092.9	5601.7	829.405	4791.67	5465.07	3188.71	6252.13	3683.05	2618.93	5021.88	6182.06	4335.13	4793.48	N/A	5876.01
ALDFAVSEYNK	F1LMZ8	Cystatin-C	7333.66	4913.21	7801.53	1750.8	6250.79	6886.67	2260.97	7654.68	4801.12	2728.01	7092.31	8884.71	5329.96	5664.11	1310.75	6587.71
MEFTSSCPNVSER	F1LNJ2	Beta-crystallin A3	12576.7	24504.5	74246.9	N/A	15945.5	23720	154504	19073.4	7145.86	18702.8	5435.5	8135.76	571.499	2409.03	1170.65	49652.2
EWGTHAQTSQIQSIR	F1LNJ2	Beta-crystallin A3	41917.4	30193.3	21584.7	N/A	3870.33	15481.2	164733	12999.3	14241.6	15471.6	12964.6	19529.5	N/A	N/A	3131.33	72218.6
ITIYDQENFQGK	F1LNJ2	Beta-crystallin A3	214585	402245	271713	4808.47	49802.4	506909	1.24584e+06	214714	50362.5	175297	62932.1	163151	20569.5	20577	29273.9	1.0155e+06
FSSQEAASSFGDDR	F1LNJ2	Propionyl-CoA carboxylase alpha chain, mitochondrial	1851.72	N/A	928.1	652.559	1067.9	592.768	1345.49	1316.38	657.622	1084.33	1008.72	1270.2	1018.04	702.908	698.269	N/A
VPVIRPDVAK	F1LNJ2	Propionyl-CoA carboxylase alpha chain, mitochondrial	1032.26	N/A	652.617	742.381	748.578	419.348	526.748	597.563	591.783	980.44	670.304	N/A	622.006	516.012	657.114	660.289
ISNIPTIK	F1LNJ2	Glutathione S-transferase alpha-4	27107.9	34437.7	36379.1	38096.5	32893.3	35245.7	30159.8	40057.3	28774.7	29327.4	35403	40478.7	34736.9	37356.4	42751.2	45976
EESLALAVK	F1LNJ2	Glutathione S-transferase alpha-4	23112.2	21509.9	22252	20193.4	20675.2	20672.2	21478	25060.2	19032.7	21325.4	23272	30209	19691.2	24532.2	28480.2	28130.9
LYYFQGR	F1LNJ2	Glutathione S-transferase alpha-4	19546.3	32758.8	16419	16256.1	20135.6	17747.6	19224.7	21939.1	18439	19273.7	17678.9	17662.7	21132.2	21875.6	18016.5	20949.4
AILSYLAAK	F1LNJ2	Glutathione S-transferase alpha-4	7073.94	15656	9126.52	10382.7	13250.9	8490.33	N/A	11007.5	10308.5	10157.1	9880.17	10141.2	11125.4	12523.6	9331.13	10262.5
YFPVFEK	F1LNJ2	Glutathione S-transferase alpha-4	15843.7	22863.9	19472.2	19346.4	17959.5	18455.6	17589.8	20104.3	17387.5	15415.5	18345.8	19211	17994.8	19841.2	23277.4	20442.3
LTASAPGYLAITK	F1LNJ2	Carboxypeptidase E	2915.63	2434.38	3086.8	2844.64	3722.77	2628.86	2538.6	3436.1	3648.96	3028.25	2741.75	2625.98	3499.72	3086.28	2785.72	N/A
SGILVPSEK	F1LNJ2	Microtubule-associated protein 2	31451.8	36652.6	35800.1	60416.3	43891.6	55321	57706.1	38973.6	25524.3	46080.2	27690.9	45431.2	59282.7	45501.6	84166.9	44660.8
TPGTPGTPSYPR	F1LNJ2	Microtubule-associated protein 2	24090.4	25570.9	26235	50337.5	27486.6	49538.9	50518.9	25907.6	13445.7	37605.8	17799.4	30974.2	43665.2	31517.4	74645.6	36938.8
GEEEEIEAEGEYDK	F1LNJ2	Microtubule-associated protein 2	3665.17	1642.17	1265.76	3081.02	1874.82	3753.38	3795.08	1992.48	199.96	2621.36	1849.94	2399.01	5140.05	2250.32	6276.56	1793.32
SGTSTPTTPGSTAITPGTPPSYSSR	F1LNJ2	Microtubule-associated protein 2	8801.42	7213.97	12380.1	22133	11594.8	12175.5	29314.9	12907.7	6174.36	18639.4	10475.1	13920.1	16050.3	14061.2	37813	16545.6
LASVSADAEVAR	F1LNJ2	Microtubule-associated protein 2	3288.09	2829.43	3570.68	6012.37	2892.05	5428.3	5670.31	2558.17	1806.85	5691.77	2804.62	4691.87	7662.44	3941.91	9762.96	2666.69
GVSGDREENSFSLNSSISSAR	F1LNJ2	Microtubule-associated protein 2	1050.01	770.696	1574.44	2965.62	1460.45	510.414	2800.3	831.823	N/A	2604.87	993.873	705.578	3122.24	1815.2	5203.63	1064.31
VDHGAEIITQSPSR	F1LNJ2	Microtubule-associated protein 2	4613.08	2942.64	3567.57	8552.65	3563.77	5748.26	7351.91	5847.31	3585.28	7837.05	2447.33	7222.55	5327.12	4353.17	12784	5106.43
EIQGLFEEDIADK	F1LNJ2	Microtubule-associated protein 2	2997.88	N/A	1871.54	4149.2	1229.91	3967.89	4377.95	1612.91	N/A	3120.84	N/A	2547.81	3981.64	2072.2	6849	1272.11
IPCFPIESK	F1LNJ2	Microtubule-associated protein 2	774.53	631.569	1729.1	3845.37	1681.67	3499.9	3650.37	N/A	N/A	3442.79	1456	1311	2934.99	1274.67	2678.41	N/A
SDTLQITDLLVPGSR	F1LNJ2	Microtubule-associated protein 2	7254.83	12572.6	14276.6	29995.3	21809.7	36923	18446.8	10107	8593.61	19164.7	10435	23453.9	40073.5	15312.1	36314.1	16108
FAAPVQPEEER	F1LNJ2	Microtubule-associated protein 2	10920.5	9144.31	11084.5	18040.9	10491.1	17418	17503.7	11828.6	7038.02	14558.5	8828.66	13608.1	20486.2	12391.1	26319.6	13191.3
DLATDLSLIEVK	F1LNJ2	Microtubule-associated protein 2	1026.97	1719.18	3038.3	8441.81	6607.8	10243	3974.96	1362.07	1280.24	3961.22	1337.91	4894.23	9909.76	3214.62	7040.07	2897.21
LINQPLPDLK	F1LNJ2	Microtubule-associated protein 2	4501.09	7983.5	9733.39	34867.4	10699.6	28346	25871.7	3199.46	2586.93	17508.2	4523.05	8057.13	34274.3	8564.13	61607.7	14694.2
SILTEQLETIPK	F1LP90	Microtubule-associated protein 2	2446.76	2034.07	2355.68	5581.42	3176.11	5008.14	4225.35	1610.29	1544.6	3968.09	1801.88	2521.6	6958.87	2927.54	7098.12	2165.42
IVQVVTAEAVAVLK	F1LQ48	Microtubule-associated protein 2	4654.44	5708.55	7511.44	11210.9	8026.08	9640.82	14450.3	7003.73	4405.25	10302.4	3861.58	9036.84	16324.6	8748.84	15658.3	6765.8
GLSSVPEVAEVETTTK	F1LQ48	Microtubule-associated protein 2	5521.22	5518.93	5757.91	5226.54	5627.65	5823.4	11465.4	5634.19	3686.22	6827.03	N/A	6910.34	12816.9	6138.94	13041	6235.12
FLEPTLR	F1LQ48	Aspartate--tRNA ligase, cytoplasmic	16009.7	15833.9	17514	17411.7	16142.1	17980.3	18977	19940.4	15869.4	15847.1	14949.7	21320.2	17957.1	16548.9	20286.8	20454
AYIDSFR	F1LQ48	Aspartate--tRNA ligase, cytoplasmic	15370.7	12179.3	11795.7	14507.5	13362.8	15343	13897.2	14931.2	12853.3	13752.2	14642.7	13450.2	14701.8	13255.2	14301.2	16906.2
GFVEIQTPK	F1LU71	Aspartate--tRNA ligase, cytoplasmic	11118.5	10495	12081.7	12691.4	12134.2	12407.3	12751.8	13150.9	11744.3	12021.1	13574.7	14283.2	11502.4	12338.2	14147	13566.6
EIVDAAEDYAK	F1LU71	Aspartate--tRNA ligase, cytoplasmic	8541.64	7492.15	6011.96	6228.44	6849.85	7738.71	7153	7828.08	6677.71	6904.27	6545.89	8580.61	8614.78	7152.03	6897.63	8337.82
FQTEIQTVNK	F1LU71	Aspartate--tRNA ligase, cytoplasmic	7421.68	6458	6411.11	6974.08	5907.56	6755.64	6507.66	7421.94	6945.22	5426.51	6913.68	5715.26	6121.78	6220.78	7840.37	7037.36
ESIIDVEGIVR	F1LU71	Aspartate--tRNA ligase, cytoplasmic	4367.34	3893.46	5660.83	5355.08	6068.21	7591.36	6823.49	7408.76	5998.36	4387.89	6309.36	8747.75	4778.69	6123.1	7251.5	8019.56
IHDPQLLTER	F1M4A4	Aspartate--tRNA ligase, cytoplasmic	2599.44	3017.24	3161.03	3007.31	3226.03	2447.5	3549.81	3159.67	2976.98	3241.51	3284.84	2776.92	2960.06	3018.81	3396.74	3192.85
VFCIGPVFR	F1M4A4	Aspartate--tRNA ligase, cytoplasmic	706.21	3881.88	1939.48	2819.92	3635.02	1715.4	1215.99	2061.82	2955.09	3313.07	1815.59	N/A	3282.3	3290.51	790.857	1914.41
QCFLVLR	F1M4A4	Aspartate--tRNA ligase, cytoplasmic	1307.83	3318.39	3042.88	2337.77	2287.77	1119.15	1999.39	2369.16	2137.71	3074.63	2541	1184.75	1989.85	3060.39	N/A	2132.3
IYVISLAEPR	F1M4A4	Aspartate--tRNA ligase, cytoplasmic	4190.44	6736.13	6087.09	6219.05	8333.75	5099.13	5362.36	6330.51	5700.23	5633.97	4733.44	5884.54	5706.13	5580.77	5049.32	6217.55
SNAYLAQSPQLYK	F1MA98	Aspartate--tRNA ligase, cytoplasmic	4553.04	2974.13	3198.87	2286.96	3358.05	2378.14	2759.85	2531.97	2189.22	2581.38	3944.95	2498.16	2432.49	2417.15	3525.17	2788.88
EIVDAAEDYAKER	F1MA98	Aspartate--tRNA ligase, cytoplasmic	1185.49	1249.04	1816.3	1105.94	1371.86	1298.76	1551.05	1584.66	1066.35	1142.78	1631.99	1773.01	N/A	1054.76	1778.71	1638.37
FGAPPHAGGGIGLER	F1MA98	Aspartate--tRNA ligase, cytoplasmic	3953.48	2906.15	4111.66	3014.57	5001.63	N/A	3210.67	3393.95	4140.02	5876.83	N/A	1666.04	2537.46	3186.08	1403.68	1714.18
IGSCTQQDVELHVQK	F1MA98	Aspartate--tRNA ligase, cytoplasmic	1064.7	297.625	1160.86	941.959	876.53	N/A	594.104	N/A	517.475	1028.39	655.968	N/A	280.02	546.696	507.052	1115.24
AIGNIELGIR	F1MA98	Microtubule-associated protein 1B	70158.3	74751	52881.3	80793.6	51842.5	87937.8	36190	67750.8	82312.2	47782.9	57443.7	80334	104062	75382.4	87927.1	59176.9
FSPEVPGQK	F1MA98	Microtubule-associated protein 1B	46562.7	46374	50580.7	52233.5	41426.8	64525.2	34668.1	56658.7	67482.6	34748.9	48292.2	66221.6	64793.2	56956.8	61668.2	49546.1
SDISPLTPR	F1MA98	Microtubule-associated protein 1B	43679.3	39348.3	47119.7	63329.7	40683.6	63975.3	45494.9	45421.9	32372.4	41743.4	35051.2	52782.8	81867.1	53266.4	77272.7	34079.8
NLISPDLGVVFLNVPENLK	F1MA98	Microtubule-associated protein 1B	3354.48	19274.1	21845.5	25900.8	37380.2	25511.7	5837.77	6893.83	21544	20001.7	9705.79	30434.6	22462	23074.3	18105.2	20340.2
TPEVSGYTYEK	F1MA98	Microtubule-associated protein 1B	16311.1	15538.4	16126.4	22720.5	15227.1	26493.1	19971.5	16458.9	11818.2	14223.5	13883.1	22920.6	38472.2	21110.9	35277.8	15842.1
ESPVSDLTSDLYQDK	F1MA98	Microtubule-associated protein 1B	6408.54	12189.4	12964.9	16899.5	10285.5	20195.7	10527.9	11609.9	8621.1	11567.2	8620.31	16004.6	18677.7	11168.2	17663	7150.55
TPQASTYSYETSDR	G3V6S8	Microtubule-associated protein 1B	6039.9	5164.9	4182.89	6181.34	3441.69	8725.25	5198.98	3738.67	2486.92	4238.49	3266.78	6407.42	11051.2	6326.9	12227.1	4358.97
LKETEPGEAYVIQK	G3V928	Microtubule-associated protein 1B	6484.09	5667.67	6754.96	6953.83	5692.97	7236.45	4467.67	7291.8	6730.29	4195.16	5782.43	8681.47	7816.59	7403.1	7447.65	4705.76
VLFPGNSTQYNILEGLEK	G3V928	Microtubule-associated protein 1B	6445.8	7527.96	10318.6	11002.4	9266.42	11869.5	4641.25	8484.39	10735.8	6853.1	10465.4	12849.9	13057.9	9327.52	12061.9	8437.35
AETEEAEEPEEDGEDNVSGSASK	G3V928	Microtubule-associated protein 1B	4980.42	2493.63	3497.35	3847.74	2615.05	4979.33	3006.01	4400.5	2383.25	2700.12	2940.65	7646.04	5041.67	5139.59	6983.88	3966.19
HNLQDFINIK	G3V928	Microtubule-associated protein 1B	4798.86	5872.85	5732.8	5963.73	6216.13	4967.87	2779.39	4536.12	8376.46	5040.89	5944.84	4238.56	6713.74	6244.43	5424.98	4075.05
SSYYVVSGNDPAAEEPSR	G3V928	Microtubule-associated protein 1B	8170.79	11681.5	5784.03	5824.01	4809.24	7138.26	3471.48	7282.56	5491.57	3266.75	6114.87	6173.06	8030.94	6737.95	7516.14	6287.42
SPSLSPSPPSPIEK	G3V928	Microtubule-associated protein 1B	4886.64	1894.31	5970.84	10729.6	4497.75	6451.84	4638.71	4091.51	2287.05	5328.34	3720.21	5951.39	8530.98	5554.2	11895.2	2726.03
DIKPQLELIEDEEK	G3V928	Microtubule-associated protein 1B	20628.6	25842	18926.4	22652	32216.8	27446	12822	22929.2	17811.3	13853.6	18375.2	33048.5	31058.9	22053.8	30515.7	17301.7
AAEAGVTEDQYGFLGTPAK	G3V928	Microtubule-associated protein 1B	11978.6	25910.9	12343.4	15667.7	11064.9	18336.4	11076.8	15364.3	11726.6	9674.88	12054.2	20956.3	23448.1	14699.5	22401.6	10837.3
SAGFIPIKEDFSPEK	G3V928	Microtubule-associated protein 1B	3510.3	8343.02	6892.64	9788.1	7901.79	8935.88	8531.66	7846.09	5791.79	7153.62	6626.66	8729.02	13106.8	6337.06	12034.1	4661.13
DFEELKAEEIDVAK	G3V928	Microtubule-associated protein 1B	3458	3496.43	4192.11	4399.95	6014.79	5068.54	5200.96	6558.12	4790.52	2846.35	3906.8	5713.6	6888.28	5445.94	7609.92	6297.4
SPPLIGSESAYEDFLSADDK	G3V9R8	Microtubule-associated protein 1B	1263.72	4856.81	2185.97	4147.9	2368.73	5204.34	1571.64	3534.94	1147.12	1745.66	1569.69	4299.47	4462.15	2831.08	4272.1	2825.4
SVGNAIEPVILFQK	G3V9R8	Microtubule-associated protein 1B	17984.1	45188.7	26396.1	30821.8	57164.3	91339.8	32271.4	56948.3	33531.9	15138.8	25271.2	92819.8	85805.5	30890.6	40356.7	28900.4
SWDTNLIECNLDQELK	G3V9R8	Microtubule-associated protein 1B	6406.15	30628.1	461.458	N/A	N/A	5187.26	1582.28	23921.1	13417.7	N/A	17582	27610.6	18762.7	16226.3	20952.5	24906.4
STEEACFTLQYLNK	G3V9R8	Microtubule-associated protein 1B	6834.12	11129.2	4667.26	3633.34	3329.53	8177.07	9327.37	12456.3	3695.49	4996.06	5428.76	10817.5	11255.1	8945.02	14117.5	10427.7
LEMYVLNPVK	G3V9R8	Microtubule-associated protein 1B	2317.48	14661.1	14378.7	17908.8	19089.7	9929.41	6937.72	11910.6	16962.4	10132.8	5013.38	11824.8	16294.3	15261	9967.83	7218.09
ITSFPESESYSYETTTK	M0RC99	Microtubule-associated protein 1B	8571.36	7732.77	4911.13	5280.12	5418.41	10465.2	6943.24	5698.93	3031.22	4733.92	4797.94	7810.68	9058.54	7575.03	13962	5730.09
TPEEGGYSYEISEK	M0RC99	Microtubule-associated protein 1B	11101.4	10117.1	7523.89	6149.36	8121.73	16496.6	8597.03	10921.2	5764.58	8301.44	7603.87	12452.1	21110.6	11664	19385.9	6196.6
DLTGQVSTPPVK	O08557	Microtubule-associated protein 1B	100134	94323.1	97014	130596	85851.2	123986	64037.6	111412	123182	68388.7	107018	132312	133235	105046	131196	108010
TTEAAATAVGTAAVAAAAGVAASGPAK	O08557	Microtubule-associated protein 1B	48710.7	71830.7	77259.1	125746	84114.2	180699	50321	84703.3	99753.6	55611.6	68728.2	126543	149021	103701	117360	68399.6
SVNFSLTPNEIK	O08629	Microtubule-associated protein 1B	33424.7	40008.3	37517.8	46861.2	38428.2	54736	36830.6	45179	32346.3	30950.5	33763.2	61659.1	80025.2	47290.8	77689.3	37394.6
SDVLETVVLINPSDEAVSTEVR	O08629	Microtubule-associated protein 1B	17677.1	13226.5	22230.7	59506.1	13116.8	80781	20723.4	34968.3	31228.3	10842.5	17912.1	30370.1	33114.7	15266	32150.8	22110.2
ETEPGEAYVIQK	O08629	Microtubule-associated protein 1B	33255.9	24303.9	23817.6	27945.7	17540.6	32536.5	19175.3	28903	27284.8	17969.1	24450	36366.3	35691.7	26476.3	36454.1	23957.5
SAGFIPIK	O08629	Microtubule-associated protein 1B	17828.2	13809.1	17529.9	21800.2	13969.4	22320	15798.6	17840.1	16044.3	18435.6	13121	22942.5	27889.9	18535.8	28041.7	13544.3
TLEVVSPSQSVTGSAGHTPYYQSPTDEK	O08629	Microtubule-associated protein 1B	13783.6	10245.5	8682.34	11860	10515.4	14492	10262.6	12977.7	8560.87	9340.35	9221.95	15447.7	21394.6	13207.3	19316.5	8974.14
TPEDGGYSCEITEK	O08629	Microtubule-associated protein 1B	5972.25	4701.94	4531.86	7526.22	3979.18	9252.2	5162.93	5070.3	3100.54	4593.39	3978.1	6844.67	13530.8	6645.28	9988.27	5101.85
TIQAHDVGGYYYEK	O08629	Microtubule-associated protein 1B	3229.51	1708.53	2421.85	3919.58	2480.41	4239.41	1315.17	1465.51	1320.95	3136.37	1680.27	1721.79	5721.15	1407.13	4986.29	1040.01
NVDVEFFK	O08629	Microtubule-associated protein 1B	8588.72	6832.67	11524.8	9597.77	10208.1	10800.9	6137.05	9802.72	6657.32	5976.29	9951.36	10514.5	11213	10736.9	12040.9	8746.62
DVMSDETNNEETESPSQEFVNITK	O08629	Microtubule-associated protein 1B	1538.48	2422.31	3542.95	3835.7	4242.9	2946.25	2132.36	2835.79	2737.98	2594.42	2039.3	4990.54	5212.04	5402.53	3521.87	978.719
LGGDGSPTQVDVSQFGSFK	O08629	Microtubule-associated protein 1B	1138.1	2053.02	2306.5	3222.5	2352.35	4081.22	1695.12	2117.5	1221.8	2328.32	1923.76	2634.74	4594.12	3263.01	3331.69	1069.94
SPCDSGYSYETIEK	O08629	Microtubule-associated protein 1B	4201.52	2338.17	1527.92	3281.16	2050.81	3801.31	2384.29	1745.79	1579.53	1967.51	1989.3	2433.19	5428.87	2720.78	5005.36	1635
ESTAAYQTSSSPPIDAAAAEPYGFR	O08629	Microtubule-associated protein 1B	3799.04	2526.81	5970.21	7578.84	4333.47	12516.6	6648.68	4263.24	2899.52	3856.22	4595.94	6739.24	12363.9	6770.88	14399.9	4346.06
ESSPTYSPGFSDSTSGAK	O08651	Microtubule-associated protein 1B	8018.54	5635.37	3876.7	6211.84	4381.72	7770.94	6580.65	4828.35	2427.22	4860.68	2936.59	6559.07	11545.1	5334.19	10899.3	3978.59
LMITDAAR	O08651	Microtubule-associated protein 1B	11530.7	15014.3	12665	4362.07	N/A	6777.04	N/A	19893.1	6248.62	4002.01	22815.9	30231.8	7649.41	4336.33	18420.2	25399.3
ASDAEIMSSQSALALDER	O08651	Microtubule-associated protein 1B	1434.44	3667.72	5336.9	6772.15	5747.17	4376.2	2915.82	2585.15	3975.18	4138.51	1923.87	4772.42	4714.16	4894.78	3598.67	N/A
VDSILLTHIGDDNLPGINSMLQR	O08651	Microtubule-associated protein 1B	9325.85	11383.5	26976.2	21480.3	30708.6	24317.6	7835.89	11083.5	12695.9	17422.3	9697.23	14622	12496.1	14064.4	15160.5	11295.4
ASLTLFCPEEGDWK	O08651	Microtubule-associated protein 1B	11942.4	8306.16	1996.69	N/A	N/A	4404.5	3628.01	4640.69	5177.92	913.405	6541.62	7375.15	4117.56	3123.25	6250.58	4887.72
LSMKPEPLFR	O08662	Microtubule-associated protein 1B	1695.23	7145.61	7154.5	7548.89	7645.99	8268.03	6129.11	8042.92	4522.29	9226.74	5963.36	8440.25	11366.1	7690.33	5374.62	8813.28
SSTVPPGLPVYLDLCYIPNHSNSK	O08662	Microtubule-associated protein 1B	1817.66	3923.58	1900.64	1465.38	2644.89	N/A	N/A	1448.05	1460.94	1779.76	2104.62	N/A	2550.66	3474.81	2256.24	1161.17
DMSLYASLASEK	O08662	Microtubule-associated protein 1B	6371.69	14649	12220	16933.4	12349	18765.3	14423.2	10401.1	10068.9	11314.3	5752.76	13477.4	22262.8	15324.5	17662	7954.68
SPDTSAYCYETMEK	O08662	Microtubule-associated protein 1B	268.83	1996.51	867.893	1239.86	1052.69	1921.43	1222.52	688.573	N/A	704.172	291.638	742.078	1180.86	1039.04	651.184	247.239
LTETNPIPETSR	O08662	Potassium voltage-gated channel subfamily B member 1	16571.5	19368.2	19439.1	22077.7	21959.9	24418.4	25257.3	23460	18281.5	18282.9	16878.1	24646	36319.9	25841.5	41367.8	22431.1
SGFFVESPR	O08662	Potassium voltage-gated channel subfamily B member 1	12110.5	10346.6	9343.67	10747.8	8160.25	10811.6	12389.8	10745.5	7973.46	11278.5	10460.3	11224.3	17297	11713.8	18640.8	8235.91
VNFVEGDPTPLLPSLGLYHDPLR	O08730	Potassium voltage-gated channel subfamily B member 1	1716.77	3131.78	3097.11	1893.49	8017.13	N/A	3141.6	2128.71	3079.3	4024.88	2435.28	4313.11	5499.76	4820.26	5525.86	3312.71
FLGTPTTNLR	O08815	Steryl-sulfatase	3574.55	3167.33	2651.93	2881.95	3459.32	3093.9	3404.87	4102.85	3071.64	3782.23	3730.02	4460.43	N/A	3384.22	N/A	3400.82
LAGAELPTDR	O08816	Steryl-sulfatase	3706.15	N/A	4279.07	3920.57	4034.41	5011.1	3972.06	N/A	4618.8	4204.12	4643.46	4522.8	3256.25	4497.85	3795.56	N/A
LASEAGDFLR	O08837	Steryl-sulfatase	3078.05	2573.6	2542.73	2363.41	2016.37	2317.27	N/A	2661.11	2394.35	2349.01	2477.82	N/A	2371.72	2260.03	N/A	1778.38
LPASALLGEENK	O08837	Long-chain specific acyl-CoA dehydrogenase, mitochondrial	1044.58	1746.04	2205.32	1545.31	2094.08	1498.82	1582.95	1346.73	1016.73	1913.46	1946.47	N/A	1214.55	1260.6	527.964	1252.34
FYFENALPK	O08837	Calcium/calmodulin-dependent protein kinase type II subunit delta	8681.66	6723.35	9027.63	8628.86	9195.47	10717.6	10565.8	9452.73	7596.15	8477.12	6233.15	10218.6	10131.4	8160.44	10359.6	9040.49
VTEQLIEAINNGDFEAYTK	O08837	Calcium/calmodulin-dependent protein kinase type II subunit delta	1613.23	1238.5	2078.67	1977.45	1095.77	3506.38	1225.11	863.788	1081.25	1102.22	1902.54	2064.03	N/A	1088.2	1845.06	1353.13
FTDEYQLFEELGK	O08837	Calcium/calmodulin-dependent protein kinase type II subunit delta	10124.6	20485.6	15370.3	13834.5	14897.6	19052.1	16705.9	15444.9	11991.8	13888.8	14312.9	22338.9	14444.5	15326.4	17393.3	19985.6
MLTINPAK	O08837	Calcium/calmodulin-dependent protein kinase type II subunit delta	6219.48	10564.2	9448.34	10348.3	14104.2	9084.75	11799.7	7388.88	11698.6	9420.3	6123.04	4860.12	N/A	7484.32	N/A	5871.55
ICDPGLTAFEPEALGNLVEGMDFHR	O08838	Calcium/calmodulin-dependent protein kinase type II subunit delta	790.815	2467.75	3892.81	378.513	1982.01	N/A	1629.77	1016.91	1490.47	2941.13	1161.62	1749.82	563.67	1651.34	1800.95	3158.34
ASGPPVSELITK	O08838	Histone H1.4	74183.2	51908.2	81125.3	51520.3	55321.4	81450	55691.8	80034.8	62138.3	38967.7	69093.1	81837.3	87210.9	80577.2	69307.2	73925.9
KASGPPVSELITK	O08838	Histone H1.4	18257	8831.58	18945.9	12735.6	17992.5	21116.3	11674.8	18535.9	19206.2	10880.9	16365.2	16528.8	21842.3	10912.2	16764	17648.7
ESVQDENLVFEEFAR	O08838	S-arrestin	1118430	2.23722e+06	2190726	2.34689e+06	2.26765e+06	3.10599e+06	1.64345e+06	2.44292e+06	2127919	1.08861e+06	2.18409e+06	3.05098e+06	3.58944e+06	2.4169e+06	3.53776e+06	2.77999e+06
SCGVDFEVK	O08838	S-arrestin	1.21601e+06	1.42198e+06	1418694	1.43309e+06	1.28507e+06	1.36383e+06	1.21767e+06	1.57844e+06	1.47525e+06	945137	1.56878e+06	1.53541e+06	1.90199e+06	1.52986e+06	2.21694e+06	1.80701e+06
TLVLVPLLANNR	O08838	S-arrestin	267621	1.61456e+06	928883	1.13598e+06	2.59815e+06	1.15834e+06	530051	978584	1.4419e+06	679900	920095	1.09102e+06	2.38359e+06	1.59826e+06	1144706	1.051e+06
YGQEDIDVIGLTFR	O08838	S-arrestin	517553	1.05972e+06	1168149	719597	1185964	877381	984077	1.24561e+06	845421	541624	1.12849e+06	1.62164e+06	1.61853e+06	1.00789e+06	1.83136e+06	1.45102e+06
SVTIYLGK	O08838	S-arrestin	391784	945335	390112	629065	952088	571142	371228	466507	954939	591978	397066	350486	1.16215e+06	921365	473185	480855
LMHPQPEDPAK	O08838	S-arrestin	180600	412569	381402	433110	383500	355224	310528	344992	533138	247344	281600	343828	394627	423444	443188	397777
HEDTNLASSTIIK	O08839	S-arrestin	324234	439237	452882	421035	459370	380721	350983	414566	426615	340100	354903	400135	519536	451374	497593	477870
IKHEDTNLASSTIIK	O08839	S-arrestin	175848	329667	216637	249748	277440	179585	184789	242233	271076	152360	255625	181832	252549	251844	277791	230087
AFATDITDAEEDK	O08839	S-arrestin	404239	454825	435768	565207	384152	526136	326826	462701	443134	345374	418891	414957	593091	447760	622417	478217
RDLYFSR	O08839	S-arrestin	2143.05	3308.98	1693.85	1682.64	2114.22	1601.71	1439.39	2930.16	2135.98	1511.29	1860.37	1370.72	2976.91	2715.22	2427.4	2045.66
DKSVTIYLGK	O08839	S-arrestin	8862.69	16664	10230.1	13375.6	17419.4	7199.95	6545.03	8735.62	14528.9	12096.1	10968.4	7323.35	20629	19736.3	10418	11327.1
KVYVTLTCAFR	O08839	S-arrestin	13326.3	37222.8	8567.62	9025.18	30574.7	8555.64	9731.87	13218.8	22528	19938.7	10609.9	9186.01	36800	36126.4	15284	14963.1
LTVSGFLGELTSSEVATEVPFR	O08839	S-arrestin	18790.4	90755	41044.2	71194.7	95781	54937.4	47888.5	52029.8	49796.4	75740.4	27814	61518.2	80542.6	42785.2	76638.5	118292
AFATDITDAEEDKIPK	O08873	S-arrestin	760613	954764	906019	1060324	1.00721e+06	1.03301e+06	778963	1.07301e+06	1.10622e+06	552926	921461	1059000	1.33712e+06	1.02151e+06	1.35176e+06	1.15609e+06
VSVEQIANVVLYSSDYYVKPVASEETQEK	O08873	S-arrestin	97362.9	177284	72016.4	29537.2	77503.7	18901.5	85240.6	135146	96066.6	55799	116207	82084.1	117302	118098	153014	136868
DYIDHVSQVEPVDGVVLVDPELVK	O08873	S-arrestin	603340	34914.8	1.98727e+06	2673330	5.10003e+06	4.27505e+06	1.15397e+06	1.08493e+06	1.89958e+06	27818.2	1.26153e+06	3.26411e+06	2.4799e+06	1.79532e+06	2944896	50322.2
EIYFHGEPIPVTVTVTNNTEK	O08873	S-arrestin	823488	2.02083e+06	924301	664654	542441	701262	683158	922242	714257	675915	1.04157e+06	954209	1.76153e+06	1.45912e+06	1.56234e+06	1391994
RDYIDHVSQVEPVDGVVLVDPELVK	O08873	S-arrestin	8430.38	10394.2	7938.07	5052.57	10374.3	2255.34	9044.52	9373.45	7444.67	5935.74	8838.39	10311.8	6693.25	8928.44	10595.6	9680.48
TVMGILVSYHIK	O08873	S-arrestin	16780.9	30614.3	27921.1	35443.8	116465	20922.1	11197.3	18865.3	80342.4	27878	15121.1	18456	50305	50471.4	13734	16492.3
VQVYPPVGAMSAPTQLQLSLLK	O08873	S-arrestin	52645	219023	245394	467917	1.93783e+06	382541	106680	119489	390944	223121	125074	142847	424788	339742	187012	181269
AVDSLVPIGR	O09175	ATP synthase subunit alpha, mitochondrial	964580	1.23498e+06	1.04667e+06	1.14983e+06	1.25838e+06	1.45879e+06	1.43068e+06	1.30159e+06	1.17752e+06	1.10062e+06	1.15432e+06	1.53178e+06	1277412	1205089	1388438	1.35848e+06
VLSIGDGIAR	O09175	ATP synthase subunit alpha, mitochondrial	993982	1.23042e+06	1070066	1.01028e+06	1.14721e+06	1.13369e+06	1.37079e+06	1.23589e+06	958042	1.11958e+06	1021296	1.28884e+06	1.08674e+06	1114553	1.24778e+06	1.43707e+06
APGIIPR	O09175	ATP synthase subunit alpha, mitochondrial	753520	839677	690130	711160	797970	883151	1.0515e+06	964822	733560	782268	692857	1.12805e+06	923609	977080	1.12494e+06	1.11408e+06
ELIIGDR	O09175	ATP synthase subunit alpha, mitochondrial	701420	726041	616899	668061	723426	804006	806237	826665	704243	744247	672999	849381	837936	803379	866491	841268
STVAQLVK	O09175	ATP synthase subunit alpha, mitochondrial	124081	121739	98753.5	102342	114992	129677	133572	117649	117082	113438	97123.9	139340	131710	103267	147939	132415
EAYPGDVFYLHSR	O35052	ATP synthase subunit alpha, mitochondrial	124234	128665	73924.4	70895.5	106511	81183.2	115877	111944	93136.3	100906	89356.1	117447	104874	104502	107995	112999
EIVTNFLAGFEP	O35052	ATP synthase subunit alpha, mitochondrial	843.609	34799.1	47001.6	80148.3	58247.6	65062	16450.6	6413.85	32942.9	41934	13870	42022.2	33149.4	28935.6	31298.7	25777.1
GYLDKLEPSK	O35052	ATP synthase subunit alpha, mitochondrial	11131.6	12329.1	10280.8	9348.14	15560.9	8656.17	11070.4	12513.6	11497.5	11190.1	13973.6	11143.4	13315.2	13238.2	9847.39	13096.8
GMSLNLEPDNVGVVVFGNDK	O35095	ATP synthase subunit alpha, mitochondrial	17512.7	35294.4	57004.8	73755	145818	77753.5	41604.3	41760.5	52230.1	56856.5	27423.2	50026.8	43776.3	41418.3	37302	45401
HALIIYDDLSK	O35095	ATP synthase subunit alpha, mitochondrial	162073	368366	160636	96252	150205	101102	371086	195374	135794	155160	154972	215990	174500	170216	206399	227077
QGQYSPMAIEEQVAVIYAGVR	O35095	ATP synthase subunit alpha, mitochondrial	3844.85	2775.53	7305.31	7941.44	9484.58	3130.92	4526.96	3989.14	3790.18	6405.99	3644.48	4072.23	2360.88	3658.39	4426.47	4834.56
TGAIVDVPVGDELLGR	O35095	ATP synthase subunit alpha, mitochondrial	646854	1480245	785320	931620	1.08339e+06	3.23685e+06	733206	1.69495e+06	799078	703388	726384	1.33746e+06	2191144	806485	1.0789e+06	1.00675e+06
TSIAIDTIINQK	O35112	ATP synthase subunit alpha, mitochondrial	203821	440942	150114	226000	181173	285341	451392	237298	199190	192175	324720	396884	438848	421778	495228	474480
RSTVAQLVK	O35142	ATP synthase subunit alpha, mitochondrial	873.602	1594.88	887.869	N/A	1708.55	N/A	988.726	835.393	1433.24	1075.76	928.211	N/A	1527.55	1111.28	N/A	1048.27
TGTAEMSSILEER	O35142	ATP synthase subunit alpha, mitochondrial	81707.9	109805	118879	122842	179046	90114.3	102052	104934	99063.2	111693	78354.1	105497	97384.2	104519	93100.4	88822.7
GIRPAINVGLSVSR	O35142	ATP synthase subunit alpha, mitochondrial	21065.8	135012	22093.6	43347.4	119031	35244.7	48541.2	38953.7	62405.3	66227.7	18918.9	18153	72820.7	76052.5	20406.9	19201.1
ILGADTSVDLEETGR	O35142	ATP synthase subunit alpha, mitochondrial	216742	494861	189607	235432	331800	584276	595586	608456	201297	393006	422108	566775	427144	395534	550119	528360
LELAQYR	O35142	ATP synthase subunit alpha, mitochondrial	576606	626771	263068	436378	561069	646188	623007	656733	517655	272862	532215	654776	622637	568727	684785	609184
NVQAEEMVEFSSGLK	O35142	ATP synthase subunit alpha, mitochondrial	18101.6	50435.5	31788.4	52866.1	46621.1	40725.3	36305.9	52434	25683.6	33731.6	34527.2	39480.5	33327.6	46904.7	45362.7	43759.3
QMSLLLR	O35142	ATP synthase subunit alpha, mitochondrial	37640.4	125098	189438	230417	304298	113487	99856.6	96510.9	237909	123111	19258.6	56866.7	57185.9	115211	73074.9	89060.8
VVDALGNAIDGK	O35142	ATP synthase subunit alpha, mitochondrial	741719	994188	797449	855378	943669	994630	978297	1.04453e+06	933363	970323	860566	1.15271e+06	988659	961064	1120792	998054
EVAAFAQFGSDLDAATQQLLSR	O35142	ATP synthase subunit alpha, mitochondrial	13104	16145.6	27528.1	30081	34401.4	32493.8	26670	34308.1	31282.9	13361.2	23438.8	47200.2	38135.1	30203.8	26904.2	16161.9
LKEIVTNFLAGFEP	O35179	ATP synthase subunit alpha, mitochondrial	4264.11	10701.6	7512.65	6015.95	14400.7	3460.94	6351.3	8143.65	8615.88	7579.3	6873.83	9386.44	10248.4	9693.06	7544.56	8971.92
RTGAIVDVPVGDELLGR	O35179	ATP synthase subunit alpha, mitochondrial	2727.2	2346.2	2930.32	2317.33	3646.44	1660.63	3156.39	3529.21	2811.62	3804.7	3599.91	2024	3157.86	2783.3	2156.99	3203.36
LYCIYVAIGQK	O35179	ATP synthase subunit alpha, mitochondrial	8771.81	32666.6	4296.19	6893.7	7149.88	N/A	14385.2	18778.5	13888.1	18090.2	5519.38	N/A	27822.7	24640.6	3835.01	5236.02
EEGLNAFYK	O35179	Phosphate carrier protein, mitochondrial	110061	91604.4	84747.6	89838.6	76918	100292	92869.2	92340.9	86389.9	83436.8	85809.6	109521	103646	96442.8	105518	103602
IQTQPGYANTLR	O35244	Phosphate carrier protein, mitochondrial	317094	329963	147740	135915	127812	163701	161272	343227	133491	128466	166604	173072	170500	157822	405845	209498
FGFYEVFK	O35244	Phosphate carrier protein, mitochondrial	21933	32730.1	23439	17562.5	26676.7	18812	26051.8	28678.2	21148.4	18004.5	21251.2	34533.8	28829.5	30106.5	30987.3	33999.1
LPRPPPPEMPESLK	O35244	Phosphate carrier protein, mitochondrial	10649.8	16493.3	15293.4	27724.4	51159.2	8223.42	14161	12186	12012.2	20404	11157.3	12943.9	9705.4	15294.8	9866.13	11157.3
MYKEEGLNAFYK	O35244	Phosphate carrier protein, mitochondrial	2477.97	2888.96	3321.98	2424.24	4188.96	1512.78	2407.05	N/A	2783.67	3051.58	2673.61	N/A	1107.02	3378.54	N/A	2745.35
GLVSSDELAK	O35263	Spectrin alpha chain, non-erythrocytic 1	73517.7	71445.9	83558.3	68084.3	55634.4	79643.7	84567.7	92787.4	81600.4	58562.2	92946.2	106749	93484	84341.1	92139.4	75999.9
DLTGVQNLR	O35264	Spectrin alpha chain, non-erythrocytic 1	72222.6	68841.8	80316.7	71069	56969.5	82506.4	84698	85375	92259.2	58260.7	87299.1	104300	76380.4	73461.1	77165.4	70252.2
IDGITIQAR	O35303	Spectrin alpha chain, non-erythrocytic 1	70381.4	78222	75447.4	68384.1	55451.7	76570.8	81909	88732.1	92119.7	61499.7	81430.5	98189.4	80768.1	74293.7	76702.6	66771.8
LLVSSEDYGR	O35303	Spectrin alpha chain, non-erythrocytic 1	63555.6	65541.9	73695.4	67216.1	47432	90293.1	77169.8	84163.3	77773.1	57956.2	80881	89311	78123.7	67608.1	75648.6	68250.8
EELYQNLTR	O35303	Spectrin alpha chain, non-erythrocytic 1	64679.7	56675.1	72528.9	59028.5	48714.6	80523	68138.1	76978	70890	52644	70767.1	88230.7	74164.1	63557.1	64676.1	61151
LSILSEER	O35303	Spectrin alpha chain, non-erythrocytic 1	60712.5	61556.4	63768	55166.5	45318	68764	68527.6	72137.7	74217.6	53125.5	66736.9	87535.9	79118.5	64673.7	64776.6	54989.9
LFGAAEVQR	O35303	Spectrin alpha chain, non-erythrocytic 1	62457	52991	67155.7	60528.7	43000.1	65529.1	63193.5	69339.7	68784	52675	62065.8	75755.4	73446.5	64421.8	62381.1	49527.2
DLTNVQNLQK	O35303	Spectrin alpha chain, non-erythrocytic 1	50473.5	39767.6	51975.6	35815.2	31673.1	51265.7	59848.9	57674.3	47745.8	36701.6	48401.7	60987.2	46931.7	39032.2	40816.8	49236.5
ITALDEFATK	O35303	Spectrin alpha chain, non-erythrocytic 1	34882.8	34576.8	39869.1	37486.9	27420.9	45875.9	38907.8	43774.2	42083.4	29457	39359.2	57001.3	48534.1	38110.6	43210.3	32562
SLQQLAEER	O35303	Spectrin alpha chain, non-erythrocytic 1	38294.5	40959.9	41922.2	36968.6	26673.6	39062	39808.7	45759.5	40732.6	29790.8	43345	57193.2	48761.1	39747.9	39271.9	33645.6
QGFVPAAYVK	O35303	Spectrin alpha chain, non-erythrocytic 1	15975.5	16346.4	24391.9	19562.6	16327.4	24046	23348	24250.8	22164.9	16601.5	25922.3	27921.4	23906.7	21172.8	21450.6	19658.4
EKLDILDQER	O35303	Spectrin alpha chain, non-erythrocytic 1	10888.2	10446.1	12025.8	10245.4	9167.08	9319.41	10588.6	12963.1	12400	10023.4	12167.9	13928.7	13836.6	12060	11030.7	8632.51
DLIGVQNLLK	O35303	Spectrin alpha chain, non-erythrocytic 1	11057.6	17167	17874.4	20883.2	16042.6	31419.5	13855.6	17116.7	20568.3	13131.8	14701.9	25792	25876.3	17993.9	18338.9	16340.4
SQLLGSAHEVQR	O35303	Spectrin alpha chain, non-erythrocytic 1	6710.15	7674.62	8718.46	7442.1	5685.06	9073	7301.81	10042.7	7965.47	6813.35	7661.15	13283.3	10763.5	9510.91	10227.5	7458.98
LDILDQER	O35303	Spectrin alpha chain, non-erythrocytic 1	17387.5	12036.2	16306.6	9979.63	9419.24	13389.4	12759.9	13756.4	15331.8	11268.3	13902.8	18670.4	14762.8	14078.1	13299.2	11643.6
LLEAQSHFR	O35303	Spectrin alpha chain, non-erythrocytic 1	5676.88	5475.15	6725.38	5215.05	3766.77	6252.75	5703.4	6410.76	6786.86	4226.9	6226.69	8253.76	6501.28	5671.37	6217.03	6006.18
HQAFEAELSANQSR	O35331	Spectrin alpha chain, non-erythrocytic 1	6097.82	4965.87	6341.32	4018.26	3925.49	4718.69	5007.06	6963.67	4895.85	4705.73	5727.08	7565.34	5452.92	5591.08	4710.41	3375.03
LIDVNHYAK	O35331	Spectrin alpha chain, non-erythrocytic 1	4601.14	3424.44	4310.07	3989.85	3107.97	5189.85	4662.88	5204.52	4744.75	3394.78	5550.79	6713.93	5284.61	5022.43	5114.88	3598.3
TATDEAYKDPSNLQGK	O35331	Spectrin alpha chain, non-erythrocytic 1	3677.99	2474.91	3285.8	2750.89	1549.22	3331.15	3373.08	4191.03	2798.9	2092.65	3220.6	6366.75	3970.08	3112.44	4260.62	3410.35
LIQEQHPEEELIK	O35331	Spectrin alpha chain, non-erythrocytic 1	10593.8	6687.21	8986.94	8115.89	6279.93	8292.94	7267.71	9832.79	9111.4	8314.91	8034.11	10826.4	9308.71	8514.31	5827.98	6003.69
LQQSHPLSANQIQVK	O35331	Spectrin alpha chain, non-erythrocytic 1	5473.44	2872.97	4302.63	3057.38	2331.44	2852.05	3398.83	3587.71	3973.32	2710.76	3662.33	4449.05	3216.49	2895.23	3060.85	2309.05
VNDVCTNGQDLIK	O35331	Spectrin alpha chain, non-erythrocytic 1	4582.17	3419.94	3691.07	2799.31	2731.21	3373.61	1721.3	4249.59	3685.94	2199.28	3996.07	5079.96	3283.86	3951.29	2864.21	1897
KLLEATELK	O35458	Spectrin alpha chain, non-erythrocytic 1	1863.88	1026	1520.2	758.436	1199.68	1199.74	1024.45	1669.32	1778.04	1129.91	1348.6	1592.88	1794.4	1932.92	1506.88	929.45
ALINADELANDVAGAEALLDR	O35458	Spectrin alpha chain, non-erythrocytic 1	1911.47	3184.54	5525.31	4120.7	10042.9	4399.29	8049.44	5204.2	3840.4	4257.08	3463.78	9749.02	4846.93	1754.76	7618.92	5734.99
LSDDNTIGQEEIQQR	O35458	Spectrin alpha chain, non-erythrocytic 1	19962.5	26870.3	15769.1	11171.8	9122.27	17428.2	15483.3	16601.8	14837.1	10349.7	18160.6	21175.6	16798	13224.8	13495.5	14857.9
SSLSSAQADFNQLAELDR	O35458	Spectrin alpha chain, non-erythrocytic 1	4466.8	10764.3	11132.4	9068.54	5086.44	12623.6	8394.21	9697.55	9506.68	5378.89	8651.58	14286.6	8613.45	8186.83	10266.4	8116.63
KVEDLFLTFAK	O35458	Spectrin alpha chain, non-erythrocytic 1	4053.16	4347.73	3298.98	1986.86	2640.57	3173.47	3025.66	4674.54	4613.43	3178.07	4550.32	5515.58	4792.48	4237.99	3622.71	2698.6
ADVVESWIGEK	O35476	Spectrin alpha chain, non-erythrocytic 1	16976.8	8312.45	2882.56	N/A	N/A	4886.11	8277.19	8266.53	6199.82	1855.09	8806.8	8669.07	4095.22	3945.08	4287.78	7640.82
DVEDEETWIR	O35476	Spectrin alpha chain, non-erythrocytic 1	20128	9405.41	2989.39	N/A	N/A	7081.4	9577.36	8506.48	7296.92	1680.36	10290.1	10768.4	4668.85	5529.42	5564.84	5731.6
QETFDAGLQAFQQEGIANITALK	O35476	Spectrin alpha chain, non-erythrocytic 1	2925.9	4003.14	5724.92	6411.85	N/A	8681.91	5991.25	5503.5	5478.7	4565.91	4939.53	8905.27	5376.15	4746.48	6544.57	5260.33
GDSLDSVEALIK	O35567	Spectrin alpha chain, non-erythrocytic 1	1829.91	1642.86	2677.01	3674.76	N/A	4808.46	N/A	3262.57	2974.25	2298.14	1994.12	5382.41	3162.24	2350.02	2923.03	1858.33
ENLLEEQGSIALR	O35567	Spectrin alpha chain, non-erythrocytic 1	12707.3	55936.6	20608.3	17194.9	12996.7	68007.9	84419.4	83425.7	27660.5	24464.5	58830.4	87581.1	48238.8	48792.7	57200	53899.4
LIQSHPESAEDLK	O35567	Spectrin alpha chain, non-erythrocytic 1	1328.81	394.76	1171.11	1108.8	N/A	1259.81	1111.27	1491.04	1185.57	1025.56	1139.61	1806.24	1057.49	846.362	1218.12	753.972
EKEPIVGSTDYGKDEDSAEALLK	O35567	Spectrin alpha chain, non-erythrocytic 1	2333.25	491.174	2110.93	1864.06	951.198	1627.03	1914.36	2331.95	1666.31	1965.57	1979.87	2026.39	1135.68	1298.56	648.579	646.631
MTLVASEDYGDTLAAIQGLLK	O35567	Spectrin alpha chain, non-erythrocytic 1	357.225	716.459	3563.75	8791.36	4464.22	4174.33	2600.9	921.663	1799.34	3083.01	1236.87	3263.77	N/A	1611.91	1864.18	1643.14
KGDILTLLNSTNK	O35567	Spectrin alpha chain, non-erythrocytic 1	9022.82	13953.2	12206.3	5449.92	12198	11462.3	12230	13930.3	13186.8	6028.84	11707.9	14027.9	16535.4	15042.9	6772.98	10240.3
SSEEIESAFR	O35567	Spectrin alpha chain, non-erythrocytic 1	80192.3	84557.5	85471.9	74658.8	56199.3	93663.5	82263	94209	91616.7	61877.3	92839.6	116139	91360	86762.4	87120.2	84731.8
VLETAEDIQER	O35567	Spectrin alpha chain, non-erythrocytic 1	59988.1	69408	74081.3	62708.4	49105.7	71895.2	72320.1	77532.2	77298.4	56475.4	70283.8	100554	74465.9	71670.1	74704.9	53363.2
ELPTAFDYVEFTR	O35567	Spectrin alpha chain, non-erythrocytic 1	24875.3	40581.2	62709.8	47714.8	48087.2	79695.2	42461	47678.4	46274.5	36622.3	45506.3	76910.1	52728.3	47750.5	45938.6	53775.9
DVTGAEALLER	O35567	Spectrin alpha chain, non-erythrocytic 1	34681.2	50588.3	41732.1	40047.1	29058.6	48109.8	51956.3	54332.1	46538.6	30111.7	50385	68032.5	53703.1	44477	45224.6	42155
LLEATELK	O35567	Spectrin alpha chain, non-erythrocytic 1	35482.1	36131.5	41161.3	37929.1	30686.8	43109.8	40460.6	47989.8	44062.1	34143.2	41333.5	56964.6	46405.9	39420.2	46330.2	32454.5
DLASVQALLR	O35567	Spectrin alpha chain, non-erythrocytic 1	16832.2	31804.1	27415.4	28291.1	21148	46813.5	26625.6	28730	34762.6	20910.9	22403.8	51568.3	41895	34375.4	28952.4	23556.5
DLSSVQTLLTK	O35567	Spectrin alpha chain, non-erythrocytic 1	16749.5	23221.8	36851.4	29920.5	24720.8	49863.6	28846.5	30726.4	37900.8	19834.6	31045.7	53097.9	36978.3	31165.5	32952.3	34109.2
DLASVNNLLK	O35763	Spectrin alpha chain, non-erythrocytic 1	17197.7	22959.1	26536.7	26848.9	22188.4	37544.8	23554.7	29734.5	30894.3	19763.9	27577.8	40448.1	28853.8	25811.1	26270.7	25179.1
LQVASDENYKDPTNLQGK	O35763	Spectrin alpha chain, non-erythrocytic 1	23986.2	23590.3	29538	21962.3	19398	26067.1	24178	23824.7	26095.9	19804.4	29198.3	30914.6	25031.5	21718	19938.9	17602.4
HQAFEAEVQANSGAIVK	O35763	Spectrin alpha chain, non-erythrocytic 1	15404	12725.5	17212.2	17025.5	8726.72	14129.8	17686.6	14850.1	14382.5	13666.1	15578.6	14294.5	15252.5	22575.9	20019.7	9735.63
EAIVTSEELGQDLEHVEVLQK	O35814	Spectrin alpha chain, non-erythrocytic 1	8513.2	9452.53	15299.1	10312.7	8094.47	13493.4	14227.5	15997.1	14003.1	8462.81	12414.9	21123.9	13334.9	13909.2	15036.4	10357.7
EAFLNTEDKGDSLDSVEALIK	O35814	Spectrin alpha chain, non-erythrocytic 1	7988.28	8970.66	13190.8	10695.5	7675.75	12985.9	12668.9	14066.6	13220.1	7614.29	13105.4	20107.7	13439.4	11422.4	12245.7	11309.4
EAALTSEEVGADLEQVEVLQK	O35814	Spectrin alpha chain, non-erythrocytic 1	8868.88	7731.63	17421.1	22696.8	11124.5	37744.6	18221.6	15967.5	16812.4	12161.6	14194.3	27657.6	15427.6	13761.5	16349	12969
ELVLALYDYQEK	O35814	Spectrin alpha chain, non-erythrocytic 1	9289.49	6551.54	8492.75	3476.01	2393.27	4423.53	10881.7	14745.7	5931.84	4524.44	8098.38	15733.9	8267.64	6273.09	10283.8	9374.29
LGESQTLQQFSR	O35814	Spectrin alpha chain, non-erythrocytic 1	6771.77	5196.36	5755.13	3452.21	3878.71	3073.39	3934.53	6395.75	5439.92	3428.41	7487.6	5374.77	4407.71	4671.73	4730.52	3733.81
NQALNTDNYGHDLASVQALQR	O35814	Spectrin alpha chain, non-erythrocytic 1	11308.9	7704.45	10344.2	7406.09	5412.71	8809.13	9034.89	9489.21	9021.66	7171.55	9499.95	10263.3	8282.31	8045.28	9724.76	6857.15
EQLMASDDFGR	O35814	Spectrin alpha chain, non-erythrocytic 1	2634.59	4103.85	5863.33	5878.35	4083.42	5240.77	5199.66	5602.51	6075.65	4460.24	3631.45	6154.28	5586.87	5379.12	3182.06	3162.2
DLNSQADSLMTSSAFDTSQVK	O35814	Spectrin alpha chain, non-erythrocytic 1	3515.82	1882.68	7371.75	6487.62	5182.6	6049.14	5507.78	3806.99	7266.32	4586.26	3850.9	6918.1	4359.99	5463.63	2932.23	3471.43
MQHNLEQQIQAR	O35814	Spectrin alpha chain, non-erythrocytic 1	1493.33	5214.73	2072.94	1599.13	1682.19	4164.09	1521.74	1752.16	3241.18	1836.36	1534.97	2096.72	1562.23	1361.03	1640.69	1978.32
KFEEFQTDLAAHEER	O35814	Spectrin alpha chain, non-erythrocytic 1	3881.09	10135.6	3940.48	4496.6	5394.38	2524.82	5045.54	4526.76	3947.35	4556.59	5140.79	6637.04	6418.96	4242.91	5709.32	5538.59
LEAELAAHEPAIQGVLDTGK	O35821	Spectrin alpha chain, non-erythrocytic 1	4216.97	3612.08	5245.44	5041.76	1328.23	5856.64	5947.51	5012.12	4977.23	3927.47	4290.68	4727.34	2676.67	2792.24	3201.29	3640.72
QFQDAGHFDAENIK	O35821	Spectrin alpha chain, non-erythrocytic 1	21905	33812.5	29371.8	28981.1	N/A	35811.3	31212.1	38664.2	29754.1	22991	N/A	56190.1	43723	31674.7	37914.7	N/A
QVEELYQSLLELGEK	O35821	Spectrin alpha chain, non-erythrocytic 1	229.638	22021.7	50680.5	N/A	17569.9	N/A	15922.1	5175.37	32875	36831.3	17568.9	44500	27472.4	N/A	36391.5	23820
EANELQQWINEK	O35821	Spectrin alpha chain, non-erythrocytic 1	9124.69	3272.99	2087.89	N/A	N/A	2148.19	4936.34	2989.8	3003.19	961.43	5100.35	2925.95	1651.21	1904.64	3161.38	2222.15
DVDEIEAWISEK	O35824	Spectrin alpha chain, non-erythrocytic 1	5764.12	2027.4	352.697	N/A	N/A	2909.99	3685.13	2630.03	2541.14	N/A	3272.34	3686.62	1747.08	1824.97	2401.2	1139.76
GVIDMGNSLIER	O35889	Spectrin alpha chain, non-erythrocytic 1	2105.51	9300.23	9797.86	9739.89	8894	9383.63	8567.23	9078.07	11492.2	7110.71	3386.54	11029.6	10016.5	10484.5	5162.86	6651.82
SADESGQALLAAGHYASDEVR	O35889	Spectrin alpha chain, non-erythrocytic 1	12809.4	13237.8	9556.02	8915.79	6278.43	10965.5	10849.3	12285.7	11270	7250.05	10399.5	12209.9	12680	11011.3	9718.33	6967.63
HALLEADVAAHQDR	O35987	Spectrin alpha chain, non-erythrocytic 1	4371.62	8547.09	8096	5599.14	6058.33	4841.61	8393.23	8464.22	7289.63	6905.65	3750.84	7690.6	6639.5	6883.6	4786.55	5364.53
HQLLEADISAHEDR	O35987	Spectrin alpha chain, non-erythrocytic 1	6046.36	4773.65	3303.13	2664.19	2652.68	1106.02	3695.63	5025.32	3895.27	3727.77	3953.32	3183.13	2242.09	3343.41	1600.39	3025.33
IAALQAFADQLIAVDHYAK	O35987	Spectrin alpha chain, non-erythrocytic 1	3436.83	6981.03	4761.85	2519.92	2870.96	N/A	4068.89	5734.33	6761.31	4302.47	4336.22	5661.39	6604.65	5726.87	3784	5005.8
SLGYDLPMVEEGEPDPEFEAILDTVDPNR	O35987	Spectrin alpha chain, non-erythrocytic 1	334.044	4103.7	4731.34	7370.16	N/A	3798.13	5770.67	2703.03	4216.12	3468.24	3112.2	7526.25	N/A	2649.06	6314.19	4368.4
EKEQLMASDDFGR	O35987	Spectrin alpha chain, non-erythrocytic 1	650.971	N/A	3630.87	4339.3	2840.65	2607.63	2470.16	2913.61	4774.02	2246.93	2839.61	3377.35	2487.29	2869.78	1666.96	N/A
HQAFEAELHANADR	O35987	Spectrin alpha chain, non-erythrocytic 1	2621.91	660.699	1008.55	578.817	760.557	N/A	370.359	1139.5	723.436	1079.48	736.446	N/A	144.308	744.44	140.833	657.479
VILPVSVDEYQVGQLYSVAEASK	O54715	Phosphatidylinositol transfer protein alpha isoform	5459.41	9651.44	12758.9	18741.1	21401.7	24590.4	10478.4	9795.04	12600.7	14726.7	8966.76	18771.7	16149.6	12665.7	14071.4	14442.9
NETGGGEGVEVLVNEPYEK	O54975	Phosphatidylinositol transfer protein alpha isoform	1303.76	1250.27	2102.75	2942.09	467.109	3066.79	817.173	2872.05	N/A	917.89	908.214	1462.68	642.485	678.463	1306.61	N/A
MLAPEGALNIHEK	O54975	Phosphatidylinositol transfer protein alpha isoform	2362.25	3238.84	3792.57	3741.33	4510.54	2299.59	3116.27	3176.32	2854.56	3416.6	2648.1	2752.16	3007.36	4067.4	2636.18	2632.22
ELNYFAK	O54975	Phosphoglycerate kinase 1	250859	254259	230936	197300	266518	270133	260233	258280	239074	228964	257299	281034	259494	245811	293356	270334
ITLPVDFVTADK	O54975	Phosphoglycerate kinase 1	102056	144671	178674	269098	225302	418998	150862	178048	206482	204818	157225	292116	237692	211037	267679	233763
VLPGVDALSNV	O54975	Phosphoglycerate kinase 1	36022.3	60100	73995.6	88329.9	118838	136818	59358.8	68451.5	79746.1	61987.5	56603.1	98503.5	92349.5	73997.1	93198.3	88794.3
GCITIIGGGDTATCCAK	O55096	Phosphoglycerate kinase 1	255829	251832	163106	149111	172332	163180	200953	206439	152064	162288	217723	184180	209648	210950	252311	231941
AHSSMVGVNLPQK	O55096	Phosphoglycerate kinase 1	32828.7	45493.4	52624.2	43827.6	80510.5	41128.2	45004.3	37392.8	51304.3	49482.2	24879.6	39200.2	37642.1	47559.8	32621.7	39247.1
IQLINNMLDK	O55096	Phosphoglycerate kinase 1	33800.2	89983.9	165186	186257	213783	154898	133001	77431.5	184951	87138.9	50402.5	139814	142379	80489.2	55537.9	65294.6
DCVGSEVENACANPAAGTVILLENLR	O55096	Phosphoglycerate kinase 1	48327.7	293993	277514	337258	266403	511739	142456	106637	186847	250700	193360	437269	391191	270142	290093	262121
VSHVSTGGGASLELLEGK	O55096	Phosphoglycerate kinase 1	249757	388141	260592	210406	275880	347599	343366	370740	267408	267286	261189	299996	274353	235519	280794	395836
LGDVYVNDAFGTAHR	O70196	Phosphoglycerate kinase 1	158883	129541	115985	98153.8	140682	129266	142834	140759	119996	120062	136061	136413	141179	133063	146906	174092
ITLPVDFVTADKFDENAK	O70196	Phosphoglycerate kinase 1	109038	146491	137759	128937	159781	138770	134075	137953	140402	115232	123953	171203	136367	130308	143746	148876
ALESPERPFLAILGGAK	O70196	Phosphoglycerate kinase 1	74125	155067	117996	47809.6	184089	32122.7	87740.1	96896.2	112959	148598	90550.6	86415.9	126355	141499	81419.3	109333
VLNNMEIGTSLYDEEGAK	O70351	Phosphoglycerate kinase 1	15349.5	44521.7	48176.3	49578.1	75545.8	52208.4	34126.1	30697	46139.9	31700.1	20237.2	49789.2	35487.1	47078.1	23646.7	26707.9
SLMDEVVK	O70351	Phosphoglycerate kinase 1	54169.7	26475.6	18245.6	14211.7	6358.7	29547.2	23155	30345.4	17598.3	20298	48487	28654.8	30291.4	29160.5	60987.5	37428.4
YSLEPVAAELK	O70351	Phosphoglycerate kinase 1	577699	863435	645024	635888	743898	945786	768385	817880	684577	568853	690791	1.01861e+06	884605	805532	936468	942892
VDFNVPMK	O70351	Phosphoglycerate kinase 1	50023.6	119237	114552	107623	151183	112046	116244	93343.3	119400	113012	73553.4	97441.9	92361.5	115042	83622.9	101062
TGQATVASGIPAGWMGLDCGTESSK	O70511	Phosphoglycerate kinase 1	8669.33	22730.7	15839.6	8670.06	8125.91	22407.4	29023.1	16766.9	21623.8	11155.4	8171.32	22751.1	17378	19703	15535	24397.5
VNEMIIGGGMAFTFLK	O70511	Phosphoglycerate kinase 1	2438.36	14622.6	10974.3	15245.7	21287.9	34943.5	17596.9	19834.1	15474.8	13379.7	11250.5	22094.9	23201	22346.9	16546.2	19367.3
LLVGVDEK	O70511	ATP-citrate synthase	79275.5	79233.8	83949.4	99435.1	89493.9	115622	93363.3	100041	110338	87181	78393.2	110919	106428	77171.2	110862	91542.4
EAGVFVPR	O70511	ATP-citrate synthase	83128.7	98603.3	77214.5	75336.8	90516	109920	92428.2	94393.1	103377	79389.1	90942.3	110935	110791	89694.4	113466	93237.9
LTLLNPK	O70617	ATP-citrate synthase	30561.2	27955.9	26445.8	32030.4	32047.8	33592.3	33089.5	31356	36464.9	30864.2	27582.7	31377.5	38292.9	28698.2	31847.4	34394.8
VDATADYICK	O88339	ATP-citrate synthase	27850.2	23898	20267.7	22043.3	20970.7	25704.3	25854.4	27585.3	24310.9	22311.5	25227.5	29216.6	29946.1	21061.5	28444	27090.7
EHEVTIFVR	O88453	ATP-citrate synthase	13519.9	11542.7	8007.31	5060.21	9995.15	3813.4	10131	11654.7	9591.2	10853.5	10607.5	11030	13217	11500.4	11327.4	10491.1
DLVSSLTSGLLTIGDR	O88453	ATP-citrate synthase	455.531	10392.3	6055.42	16799.7	7609.89	15888.1	4971.35	2314.76	13203.5	8935.93	3361.7	6407.67	10177	8318.37	6476.49	8481.75
TIAIIAEGIPEALTR	O88600	ATP-citrate synthase	23242.2	74116.7	35071	37349.1	51403.6	45920.4	31410.5	32637.9	43115	33358.2	28094.1	51342.3	49659.7	36301.6	45081.6	40055.7
EAYPEEAYIADLDAK	O88600	ATP-citrate synthase	9856.24	15569.8	7090.47	8379.3	8487.35	28437.3	9318.06	10066	10822.4	6570.73	8550.91	14612	23113.8	17062.1	12328.5	19348.1
TTDGVYEGVAIGGDR	O88600	ATP-citrate synthase	63116	42414.2	35336.3	38452.5	21113.9	51112.2	43842.5	48285.9	27109.4	33145.3	21860.8	55682.9	52205.8	40396.9	26391.8	41085.4
GQELIYAGMPITEVFK	O88600	ATP-citrate synthase	4202.34	8568.45	8715.51	17087.2	19009.4	11020.7	9108.69	6025.65	7919	7021.21	4920.98	14743.6	8335.4	7139.21	6196.16	8541.01
YICTTSAIQNR	O88600	ATP-citrate synthase	29828	26343.8	23763.6	26415.4	23143.7	32224.3	28974	29206	15647.5	23386.6	25492.4	30503.6	28294.4	26682.8	33423.3	29472.7
EILIPVFK	O88600	ATP-citrate synthase	15878.6	30131.9	25436.6	30261.7	31657.1	48367.5	25171.8	26710.7	32554.2	19783.9	19892	48605.2	39935.1	25272.7	35609.5	29966.2
DGVYILDLAAK	O88600	ATP-citrate synthase	14555.6	18536.9	17463.9	17967.2	21999.6	32529.2	17032.3	17451.3	22510.4	12108.5	16881.5	30421	26303	16618.9	22611.4	22386.8
LGLVGVNLSLDGVK	O88600	ATP-citrate synthase	10672.4	15057	7934.66	20116.6	16295.7	18943.8	10921.4	11681.3	23534.2	16234.8	7068.45	8430.88	23348.1	16117.6	8942.39	10170.6
LYRPGSVAYVSR	O88600	ATP-citrate synthase	9039.6	14654.6	10073.3	10580	13964.6	11247.1	8990.4	10833.8	19303.4	11377.7	9883.87	6392.33	14928.2	13343.4	8101.65	9742.52
TILSLMTR	O88600	ATP-citrate synthase	3517.88	18308.3	8911.72	26159.7	33733.5	13977.2	19269.8	5404.99	31990.8	21167.3	5319.36	5277.62	8114.84	21892	8320.3	14488.8
EGDYVLFHHEGGVDVGDVDTK	O88600	ATP-citrate synthase	6773	4128.25	3232.28	1927.06	3637.53	1560.08	3790.45	4431.47	3021.26	1808.75	2998.1	N/A	3274.33	2349.95	2553.27	3023.07
LIMGIGHR	O88600	ATP-citrate synthase	2141.05	4483.45	N/A	1641.61	2223.48	2151.84	1957.36	866.32	2551.86	1807.14	N/A	1512.8	3051.72	1596.27	1411.63	1474.47
AFDSGIIPMEFVNK	O88600	ATP-citrate synthase	5800.47	8894.24	20354.5	25249.4	31342	29653.3	18215	15984.2	24462.9	16584.3	6689.15	27203.4	21663.9	10565.5	9091.23	19251.6
QHFPATPLLDYALEVEK	O88600	ATP-citrate synthase	3642.25	5099.41	5725.68	2256.41	4778.17	N/A	6670.09	6055.19	5679.85	5299.36	5730.22	4034.95	3969.28	4767.12	6701.92	6785.48
GVTIIGPATVGGIKPGCFK	O88600	ATP-citrate synthase	4072.7	15753.7	5248.87	7638.84	12200.6	6119.76	4087.67	5494.12	11085	7844.63	4487.94	1727.5	10537.5	10047.9	2721.19	4131.1
SGGMSNELNNIISR	O88600	ATP-citrate synthase	4588.24	10895	9946.93	10530.2	12845	10353.7	9570.82	9425.89	12072	10074.2	6563.97	11635.9	9301.29	10408.6	8478.94	8752.36
MIVVLGEIGGTEEYK	O88600	ATP-citrate synthase	7296.17	14130	16798.8	12699.7	19223.3	10678.5	21338.4	14856.5	16389.4	15982	10843.5	12862.3	12703	14236.5	11867.4	13086.7
IGNTGGMLDNILASK	O88600	ATP-citrate synthase	1303.04	4021.8	3862.02	5226.44	6913.22	4351.22	4023.79	2914.14	6032.82	4006.89	2444.88	2403.25	4064.8	4440.5	2479.34	2764.62
AVQGMLDFDYVCSR	O88600	ATP-citrate synthase	735.88	2557.57	2588.37	1913.01	1789.65	N/A	4430.97	2294.87	1656.93	2758.95	1185.41	1145.24	710.78	2111.88	2121.55	1420.4
KPASFMTSICDER	O88600	ATP-citrate synthase	1487.29	3874.53	6183.63	6095.24	9155.62	N/A	4913.92	4090.24	7212.23	4665.34	2969.4	N/A	4486.55	4413.28	3898.55	N/A
VLQALEGLK	O88600	40S ribosomal protein S19	4592.9	8472.76	6929.7	6887.66	6133.76	6307.57	5055.88	5699.8	5002.35	5589.57	6186.37	5472.6	3623.63	6159.85	6412.69	9086.35
ALAAFLK	O88658	40S ribosomal protein S19	6000.99	6314.35	6092.36	6018.19	5650.97	5454	5109.63	6765.78	4458.17	4828.29	7263.98	6796.4	5915.04	6613.4	5985.09	8013.49
FLDGIYVSEK	O88761	60S ribosomal protein L9	4329.38	5383.57	5924.56	5627.07	4250	6683.3	4900.22	5774.39	5635.28	4270.81	6372.71	6116.05	3682.95	5920.33	6245.33	8463.82
TILSNQTVDIPENVDITLK	O88761	60S ribosomal protein L9	1805.95	3608.24	1728.27	2421.83	N/A	4813.48	2396.96	2727.72	1201.39	928.221	1955.17	2642.39	N/A	1371.37	3174.08	2393.37
VLTVINQTQK	O88761	60S ribosomal protein L35	5852.88	7690.19	8990.74	7441.3	6680.4	5286.82	7604.43	6739.96	6105.77	5799.13	7321.89	5375.67	5008.52	7876.22	7250.31	9745.34
LAQQYYLVYQEPIPTAQLVQR	O88761	Proteasome subunit alpha type-2	4611.27	6986.84	4601.17	5329.83	9075.32	7361.61	4314.39	5915.49	4810.5	5110.65	4626.49	6172.47	5975.19	6814.27	5399.65	6075.63
DYLAAIA	O88761	Proteasome subunit alpha type-2	4051.24	3856.6	4648.04	3683.41	5074.13	5035.32	3991.3	3864.83	2494.64	2930.23	3797.81	4407.85	3940.72	2635.27	4309.92	4341.9
GYSFSLTTFSPSGK	O88761	Proteasome subunit alpha type-2	1996.84	3387.47	2375.2	3137.03	4371.74	2692.92	1725.1	1102.15	2113.94	3643.04	1249.08	N/A	3648.35	4345.2	N/A	1727.21
LVQIEYALAAVAGGAPSVGIK	O88761	Proteasome subunit alpha type-2	616.442	1551.05	1535.54	2159.62	2076.46	N/A	1244.57	2045.9	2613	2484.26	1111.8	N/A	2813.52	2810.78	995.507	1258.8
YTIGLGQAR	O88761	Hydroxymethylglutaryl-CoA synthase, cytoplasmic	7140.73	5536.85	4604.55	4367.51	4978.56	4749.56	5233.01	5261.04	N/A	5553.75	4822.54	N/A	5800.97	5243.62	6212.29	5446.73
LEDTYFDR	O88761	Hydroxymethylglutaryl-CoA synthase, cytoplasmic	3674.98	2299.12	1592.2	1572.88	3260.64	3950.5	2369.95	3623.33	2283.73	3246.51	3004.29	3531.58	N/A	1669.5	2956.61	2712.28
NSIYSGLEAFGDVK	O88767	Hydroxymethylglutaryl-CoA synthase, cytoplasmic	1397.69	1727.67	2279.13	2540.37	2745.42	2961.96	2454.1	3399.52	N/A	2143.97	2459.48	2529.73	1944.49	2602.82	4117.4	2644.73
NSLSYDCIGR	O88767	Hydroxymethylglutaryl-CoA synthase, cytoplasmic	2935.74	3163.91	2931.79	2182.36	2281.75	N/A	2847.8	2668.46	1687.24	2963.45	2482.88	2144.73	N/A	3273.63	2740.13	3866.09
SNQVEAEAADAGQAPEAG	O88767	Peripherin-2	163937	148153	131330	102695	120721	106491	91377.6	142794	138708	76116	164128	164266	146004	154146	192139	153312
ICYDALDPAK	O88767	Peripherin-2	196203	228717	201137	152664	174448	158896	189681	210510	204018	139550	209692	222129	206332	205299	249601	253292
YLDFSSK	O88775	Peripherin-2	290312	227563	24116.7	28913.6	36139.7	47535	28049.6	34470.6	45327.3	25600.5	47339.3	43121.7	79829.8	29702.5	72784.2	37670.4
AFLESFK	O88941	Peripherin-2	183232	275220	229876	200694	236613	232342	165390	250537	274688	170308	235598	285875	272960	262129	343063	308620
GSLESTLAYGLK	O88941	Peripherin-2	124441	192158	67715.8	121722	129435	130531	93531.6	157460	66710.1	96354	163897	184216	194571	164736	230812	189092
AFLESFKK	O88941	Peripherin-2	4410.96	9292.23	5068.19	2584.37	6535.24	N/A	2385.31	5564.99	5686.42	2907.6	7508.02	3475.84	4955.73	7744.77	5325.12	6436.76
TIDMLQIEFK	O88984	Peripherin-2	4321.85	18641.7	31862.5	22541.4	29472.8	15377.5	13042.9	20625.6	19272	17542.2	8571.96	20914	13504.2	20915.7	21209.3	25485.8
AVLTLDER	O88984	Alpha-1-antiproteinase	6456.32	9729.7	29348.9	9281.14	7628.53	8850.05	4608.86	11292.5	4702.5	8723.67	11443.9	13899.6	10173.7	8003.88	7613.93	8295.4
NCSSFLIK	O88984	60S ribosomal protein L28	3238.16	3124.55	2868.33	3296.73	1862.61	2622.36	3001.55	2255.67	3273.64	2479.94	3590.33	2568.17	2514.2	3354.44	3317.81	3415.39
LEDLIVK	O88989	Acetyl-CoA acetyltransferase, mitochondrial	8782.51	9036.62	7474.41	7410.63	8954.96	9257.61	8066.61	8722.89	8945.95	8035.6	8312.09	9342.86	8200.5	7605.55	7734.55	7331.23
TPIGSFLGSLASQPATK	O88989	Acetyl-CoA acetyltransferase, mitochondrial	1155.05	3041.55	2101.6	3767.19	4969.03	3255.06	2493.04	1665.3	3171.64	3365.83	1883.87	1235.03	3025.36	3433.21	1974.16	1797.21
LGTIAIQGAIEK	O88989	Acetyl-CoA acetyltransferase, mitochondrial	10377.8	9784.56	6736.64	7959.78	9240.68	9134.22	8488	6577.22	8240.37	8199.43	7510.86	6458.79	8061.49	9268.33	7823.15	7474.95
FANEITPITISVK	O88989	Acetyl-CoA acetyltransferase, mitochondrial	7100.52	6006.22	5153.82	6658.76	6657.54	10529.8	5234.47	6000.82	6344.8	5391.12	4822.16	5424.38	7333.3	5905.06	6353.1	7070.84
IAAFADAAVDPIDFPLAPAYAVPK	O88989	Acetyl-CoA acetyltransferase, mitochondrial	510.654	3293.88	4658.77	7449.08	5336.23	8298.19	1826.55	1370.87	3642.49	4635.5	1950.54	2742.55	3910.89	3459.81	1970.2	1783.59
EVYMGNVIQGGEGQAPTR	O88989	Acetyl-CoA acetyltransferase, mitochondrial	448.41	2574.68	2762.26	2133.76	3647.84	2252.48	2320.69	1651.35	2459.05	2425.37	1552.69	1904.14	N/A	2766.67	456.643	N/A
IIPADLEAK	O89038	Glutamate decarboxylase 1	8452.74	15404.1	13066.9	12990.6	14526.8	13714.1	14938.2	14888.7	14723	15697.7	13322.5	14387.7	12490.2	10605.5	12539.7	12321.9
GTVGFENQINK	O89038	Glutamate decarboxylase 1	6348.42	5550.3	5167.99	5720.99	5467.12	5561.88	5064.91	6607.93	5487.19	4955.87	6295.94	5305.96	6573.98	4484.06	6816.4	5354.37
NLLSCENSDPGAR	O89049	Glutamate decarboxylase 1	5389.13	3136.89	2808.8	4348.47	3516.25	4058.39	5460.58	3955.65	3159.91	3180.02	3759.13	3249.78	5646.62	3501.85	4563.45	3543.19
AGAALGFGTDNVILIK	O89049	Glutamate decarboxylase 1	2405.19	2021.16	1494.73	2959.45	1707.42	2584.16	1431.34	2390.65	2495.05	2318.98	1755.64	1572.09	2320.48	2419.59	1327.01	996.359
LLLEGVENK	O89049	Long-chain-fatty-acid--CoA ligase 1	11861.7	13559.5	9647.87	12127	12101.1	11721.5	12451.8	11488.5	12759.7	11064.6	11243.3	11159.7	11283.7	12114.3	11958.8	12122.2
SQIDELYSTIK	O89049	Long-chain-fatty-acid--CoA ligase 1	5438.27	6449.44	4208.36	5131.24	5088.01	6935.34	6766.85	6478.48	6615.52	5088.69	5784.38	7482.36	6455.26	5918.81	6933.8	6341.9
GIQVSNDGPCLGSR	P00388	Long-chain-fatty-acid--CoA ligase 1	7091.63	4041.75	4906.72	4351.05	4676.58	4909.29	4899.51	6231.75	4399.35	4013.65	5080.28	4427.86	5376.54	5595.83	4705.43	4149.99
GFQGSFEELCR	P00388	Long-chain-fatty-acid--CoA ligase 1	6043.81	2952.74	3496.92	3557.24	4265.94	3304.51	4157.2	4050.32	3941.88	3330.56	4718.53	5003.77	4051.6	4157.16	4104.31	3263.51
GIAVHPELFSIDNGLLTPTLK	P00388	Long-chain-fatty-acid--CoA ligase 1	950.144	2571.65	1850.1	1509.36	4124.76	N/A	1171.57	1442.34	1974.54	2741.38	1291.4	1510.25	1692.99	1847.74	1815.64	2084.62
VLQPTIFPVVPR	P00388	Long-chain-fatty-acid--CoA ligase 1	5967.21	11385.6	10090.2	13812.3	17007.7	19932.4	5760.26	11321	14396.3	10594.6	9109.13	14937.8	18195.9	14336.3	10839	11286.3
MEVHELFR	P00507	Long-chain-fatty-acid--CoA ligase 1	584.755	4205.93	4806.82	8012.34	6562.5	7072.23	6231.46	4908.15	3679.65	5790.89	2934.96	4303.92	6337.84	5713.98	6022.25	5067.58
AELSVIFADKPEK	P00507	Long-chain-fatty-acid--CoA ligase 1	2000.73	2040.17	1281.49	1030.93	2185.03	N/A	1811.42	N/A	1963.81	2016.08	1683.22	941.166	N/A	1252.69	1369	1807.48
SQEVAYTDIK	P00507	Glycogen synthase kinase-3 alpha	2596.99	1564.64	2125.65	1776.74	1935.84	2633	2608.62	2393.54	2072.04	2085.18	2657.66	2613.23	2128.99	1903.85	2611.42	1771.66
VTTVVATLGQGPER	P00507	Glycogen synthase kinase-3 alpha	5631.17	4223.64	3275.92	4244.03	4009.26	2868.97	3042.93	3796.78	3773.31	3837.64	3200.53	2420.88	3825.89	3794.2	3546.82	2583.25
TPPEAIALCSSLLEYTPSSR	P00507	Glycogen synthase kinase-3 alpha	2002.84	1234.44	2291.87	2631.71	3310.97	1591.15	2142.4	2099.53	1798.32	1957.21	1844.18	N/A	2083.98	2888.76	2346.34	1940.3
TPPEAIALCSR	P00507	Glycogen synthase kinase-3 beta	6367.86	N/A	5211.7	4600.17	3864.48	4977.86	4157.6	4286.91	4426.83	4641.33	6245.93	4876.18	3799.06	4222.87	4160.58	5166.57
DIKPQNLLLDPDTAVLK	P00507	Glycogen synthase kinase-3 beta	1658.7	1248.75	1702.05	2030.5	2525.29	1945.49	1227.72	1157.68	1594.86	1496.45	1554	1675.47	2194.43	1450.39	2175.39	1233.61
GAVIPIR	P00507	S-adenosylmethionine synthase isoform type-2	14183.2	17571.2	15442.6	16580.3	16858.1	17274.8	15271.1	18928.5	16218.6	15456.7	14416.3	18046.4	19753.6	18757.3	19283.4	18763.1
FVIGGPQGDAGLTGR	P00507	S-adenosylmethionine synthase isoform type-2	7164.15	4957.39	6826.52	6448.16	6666.08	6992.24	7093.25	7757.42	5135.29	6866.89	7903.79	7822.18	7744.12	7616.56	8080.8	8439.75
ELLEIVK	P00507	S-adenosylmethionine synthase isoform type-2	3508.18	4332.87	3204.26	3233.91	3939.43	2819.66	2678.33	3084.94	2859.76	2832.87	3278.38	3317.1	2818.92	3125.45	2206.5	3638.97
NITLDDASAPR	P00507	Cold shock domain-containing protein E1	9650.53	9029.69	7606.31	6635.5	6888.02	8532.67	8297.61	10027.2	8198.53	6515.98	7492.69	10441.1	9554.03	6615.65	9345.4	8980.45
INFVIDNNK	P00507	Cold shock domain-containing protein E1	2761.05	1618.35	4017.75	3655.94	4187.67	3158.29	2656.64	2021.9	2837.04	3172.7	1748.14	2280.22	3044.92	3169.76	2595.26	2912.32
EAFGFIER	P01026	Cold shock domain-containing protein E1	2770.85	2186.04	2737.55	3248.92	3681.61	2095.58	2890.56	2864.61	3634.29	3227.76	3420.38	2414.47	2501.9	2057.17	3879.95	2862.3
GDLETLQPGDDVEFTIK	P01026	Cold shock domain-containing protein E1	2064.3	N/A	2388.4	2314.42	2184.92	3433.09	2049.58	2408.31	1857.11	1414.85	1863.13	N/A	2735	1936.92	3132.87	2698.14
VTLLEGDHVR	P01026	Cold shock domain-containing protein E1	1663.55	1702.76	1972.75	1476.51	1709.43	859.521	1502.22	1494.29	1453.99	1054.44	1213.89	1607.09	2033.11	2134.86	1855.3	N/A
FYALSAR	P01026	Calreticulin	112931	138613	123013	112759	127126	133231	141799	164528	120160	133627	139316	140567	143327	121115	154375	143370
LFPGGLDQK	P01026	Calreticulin	79528.5	85579	95255.5	94150.1	93572.2	89751	96619.5	116563	89410.7	104053	101345	114021	95359.9	89890.7	98038.9	98950.4
IKDPDAAKPEDWDER	P01026	Calreticulin	4867.5	3615.49	1384.1	749.405	718.708	3158.57	3103.48	1607.66	2604.13	1576.92	3140.31	2299.78	1720.53	2119.71	1861.14	2126.88
EQFLDGDAWTNR	P01026	Calreticulin	39049.2	30275.7	7960.69	2722.29	2882.14	20180.6	24542.2	21455	15545.6	9073.09	24826.7	25461.8	18003.9	15570.9	18101.3	21962.8
GQTLVVQFTVK	P01026	Calreticulin	8106.43	21363.4	5515.45	10740.5	8991.01	6063.85	7501.23	12461	12346	14345	5820.77	3978.4	17952.7	15943.7	3687.03	6343.65
VHVIFNYK	P01026	Calreticulin	3060.91	13724	4989.87	6283.09	8438.78	5516.43	5303.35	5690.47	7710.64	11792.6	5702.53	3461.26	11918.6	10692.3	2692	4475.94
IDDPTDSKPEDWDKPEHIPDPDAK	P01026	Calreticulin	1757.21	7730.07	931.504	N/A	1613.95	N/A	3148.48	2640.66	901.603	2855.47	2708.9	1109.06	1136.43	2292.35	N/A	1443.32
DMHGDSEYNIMFGPDICGPGTK	P01026	Calreticulin	2329.65	12866.8	11128.8	15709.7	20620.2	13787.1	12988.1	8010.03	10993.9	13201.9	4561.24	11961.3	7824.59	11648.7	5392.85	8378.77
ETLPAEQDLTTK	P01026	Proteasome subunit alpha type-1	21923.3	18288	20113.8	18780.6	23391.2	19101.6	20057	21297.5	17178.4	15530.8	20040.3	24214.3	19234.8	18812.2	19820.5	20901
NVSIGIVGK	P01946	Proteasome subunit alpha type-1	10587.5	17086.5	14265.8	15886.6	17159.2	12816.1	14082.7	13938.8	12845.6	14331.7	11165.1	12627.6	14613.9	14866.6	14762.6	14797.4
LVSLIGSK	P01946	Proteasome subunit alpha type-1	16402.7	20790.5	17462	18622.1	19227.2	15537.3	16181.6	18766.6	16487.5	16642.8	15701.3	18135.3	17910.3	18801.9	16559.1	20740.9
DVFISAAER	P01946	Proteasome subunit beta type-1	15574.6	15294.1	13109.4	13131.8	11704.2	11853.3	13208.3	12880.1	10846	10996.8	12718.4	14267	11609.9	12555.3	13980.8	16130.2
GAVYSFDPVGSYQR	P01946	Proteasome subunit beta type-1	12100.7	15633.1	9846.24	9607.46	9428.54	10301.3	10141.1	13188.6	8043.81	8270.79	10774.5	11506.6	10876.6	11263.4	12192.1	14100.1
LSEGFSIHTR	P01946	Proteasome subunit beta type-1	873.086	678.672	843.276	1115.35	1064.09	N/A	N/A	569.317	481.54	672.132	1042.2	N/A	821.505	806.146	N/A	947.401
EGIREETVPLR	P02091	Proteasome subunit beta type-1	5846.3	6941.88	8970.97	6633.38	6450.03	7129.79	6640.01	6734	6664.02	6007.29	6479.96	8380.34	7144.18	6268.2	5446.4	N/A
AGGSASAMLQPLLDNQVGFK	P02523	Proteasome subunit beta type-1	398.291	N/A	2850.08	4390.85	3136.38	2944.71	2115.14	1154.16	3222.85	2550.92	1258.37	N/A	1819.68	1749.35	1248.37	1467.27
NMQNVEHVPLTLDR	P02523	Proteasome subunit beta type-1	3769.81	7053.69	8571.47	8162.19	11286.6	5648.78	6321.74	5737.43	6513.27	7711.92	4115.51	6068.97	5210.16	6731.22	N/A	6549.79
AVENSSTAIGIR	P02523	Proteasome subunit alpha type-3	9370.23	9413.56	7755.21	7366.85	7156.34	6592.92	9423.1	8827.2	6081.21	6288.77	7399.48	9881.16	8201.32	7560.8	8725.31	9590.66
SNFGYNIPLK	P02523	Proteasome subunit alpha type-3	8823.82	10166.3	10392.4	10275.7	10511.7	9645.08	10610.3	11431.1	8148.19	7967.25	10209	10066	11395	10132.4	9451.6	10932.4
DGVVFGVEK	P02524	Proteasome subunit alpha type-3	7151.58	5994.68	6124.38	5829.34	7010.01	6307.63	6367.83	7292.17	5249.41	6078.63	5791.78	7064.15	6093.31	6238.12	8301.4	7549.95
NQSFCPTVNLDK	P02524	60S ribosomal protein L27a	8227.07	5161.64	6704.62	6419.42	5470.61	6019.07	4881.81	5649.65	7212.66	4921.89	7931.73	6975.76	4404.55	6360.2	6662.54	7608.06
ATIQDVLR	P02524	AP-2 complex subunit alpha-2	80060.4	72604.6	70345.5	74051.8	71481.9	87959.2	78990.1	82119.8	85375.8	69824.5	71859.6	94968.3	98104.9	84475.7	98595.8	85756.2
YGGTFQNVSVK	P02650	AP-2 complex subunit alpha-2	50702.1	46121.5	39947.9	39628.6	40801.4	47530.3	52297.8	44232.5	42664.2	38462.7	40696.4	45102.7	48628.2	38145.3	51898.8	49295.6
LPITLNK	P02696	AP-2 complex subunit alpha-2	33050.2	28083.8	31701.4	40603.8	36180.9	37901.4	36320.6	33070.2	37644.6	35284.3	30034.3	32119.6	40881.2	31303.4	35501.2	36379.1
TTQIGCLLR	P02696	AP-2 complex subunit alpha-2	30069.5	33109.2	29605.4	30119.9	30573.9	36984.7	33125.5	34932.3	35138.6	32668.1	34399.3	38186.7	41978.5	35692.2	39899.9	39933.6
QSAALCLLR	P02770	AP-2 complex subunit alpha-2	46478	44283.8	34951.9	38703.8	38978.5	41878.7	42099.9	44202.7	39103.2	41728.6	41482.1	40550.1	49943.7	42243.8	50678.7	43248.4
VIQIVINR	P02770	AP-2 complex subunit alpha-2	15246	39161.3	16131.6	29253.6	39124.3	30098.1	20270.6	23224.1	39593.2	40155.5	14896.6	18399.7	50505.9	41867.3	17211.6	17512.7
ALLLSTYIK	P02770	AP-2 complex subunit alpha-2	17245.5	26646.5	15065.4	26441.5	29905.5	24254.5	17059.1	18248.7	30947.5	28264.2	12601.3	16573.1	35156.3	27360.1	15718.3	18572.5
THIETVINALK	P02770	AP-2 complex subunit alpha-2	9912.94	11405.9	7940.83	8688.87	11434.2	7437.39	8366.12	7386.54	10442.1	10625.7	7140.18	5695.16	11240	11479	8846.83	8820.07
VGGYILGEFGNLIAGDPR	P02770	AP-2 complex subunit alpha-2	5700.54	12192.5	6042.28	3576.96	9133.25	3451.76	4716.23	7249.12	7410.94	8658.66	6595.71	12026.9	12359	10407.4	8224.17	8684.44
GPSTVTDLEETKR	P02770	AP-2 complex subunit alpha-2	2282.45	2324.78	2847.64	2986.2	2250	3436.84	2900.45	2194.76	3527.14	2624.04	2401.75	3417.85	2705.63	3435.35	2882.37	2357.38
LCELLSEQF	P02770	AP-2 complex subunit alpha-2	3832.89	1440.64	2720.93	4318.24	2703.21	4650.8	2925.95	1060.18	3041.47	2173.81	2650.3	3033.41	2325.27	2688.29	3114.72	1799.08
FHLCSVPTR	P02770	AP-2 complex subunit alpha-2	9267.56	9872.66	7797.34	8613.71	9548.43	7862.29	8044.63	9286	10001.6	8882.18	8967.63	7348.03	10870.7	10263.5	7355.98	9443.06
NNGVLFENQLLQIGLK	P02770	AP-2 complex subunit alpha-2	1394.69	981.533	598.451	1681.96	933	1825.06	654.71	780.245	1234.93	1549.42	561.506	N/A	1218	991.506	1034.73	1031.13
LLQCYPPPDPAVR	P02770	AP-2 complex subunit alpha-2	35169.8	31418.5	13305.5	14413.5	23387	35469	31633.1	32806.3	14833.6	13474.4	16238.8	38758.2	36480.1	29075.6	42817.7	33081.1
YLALESMCTLASSEFSHEAVK	P02770	AP-2 complex subunit alpha-2	2301.01	4358.87	5015.5	4219.05	6419.87	N/A	3652.51	2925.66	2422.93	3785.71	N/A	N/A	2803.87	3300.62	2750.12	2358.19
ACNQLGQFLQHR	P02770	AP-2 complex subunit alpha-2	11936.2	11148.5	14632.2	16441.4	21632.2	15961.6	14903.8	15710.4	19732.2	23074.3	8677.84	11073.3	20361.5	10760.2	13399.5	16957
ILVAGDTMDSVK	P02770	AP-2 complex subunit alpha-2	9162.21	40988.7	39529.5	48274.3	48503.6	38817.6	39062.3	31001.7	55375.6	41137.9	22408.6	37203.1	39716.1	41143.6	15729.7	29856.8
FVNLFPEVK	P02770	AP-2 complex subunit alpha-2	23503.8	42880.5	38415.7	42175.3	52904.1	55497	40529.7	39541.5	50763.6	34438.3	33842.3	47784.3	56728.8	43794.2	51082.7	42947.2
GLAVFISDIR	P02770	AP-2 complex subunit alpha-2	13401.4	32577.4	17915.1	11266.6	25695.1	9719.72	18804	21714.6	20706.2	18409.2	16484.2	26942	33121.6	27741.2	23661.2	24119.3
LTECLETILNK	P02770	AP-2 complex subunit alpha-2	20501.7	18243.3	16301.6	20830.8	15459.1	24454.1	20866.9	25118.3	21967.3	16007	20662.3	23018.3	23695.4	18063.8	25375.6	20104.6
QLSNPQQEVQNIFK	P02770	AP-2 complex subunit alpha-2	6510.28	5788.15	5518.96	5756.94	5429.61	8071.55	5474.87	6922.23	5422.06	5213.89	5829.92	6720.15	8380.82	5782.2	7639.49	6739.11
TVFEALQAPACHENLVK	P02770	AP-2 complex subunit alpha-2	15588.5	16618.6	14126	14870	17248.1	14960.5	18233.8	14842.1	16474.2	14188.3	14109.6	15270.8	17978.4	15549.4	19846.3	17956.2
MFIFYGNK	P02770	AP-2 complex subunit alpha-2	8210.65	14664.2	14966.2	12018.8	22855.4	10401.7	15508.7	12207.3	15768.8	16370.9	7541.75	8693.55	14808.5	14075.4	7381.69	10413.6
IAGDYVSEEVWYR	P02770	AP-2 complex subunit alpha-2	22423.3	12739.1	2783.47	N/A	N/A	5040.78	12392.5	9565.73	5606.49	1672.08	8462.68	7581.46	5637.68	4049.85	8700.93	7549.17
EMAEAFAGEIPK	P02770	AP-2 complex subunit alpha-2	5850.49	22992	23358.2	29734.7	33700.9	26149.5	24579.1	19403.4	30280.8	21618.1	15154.2	22974.5	23940.8	28316.7	15666.4	17433.6
LSTVASTDILATVLEEMPPFPER	P02770	AP-2 complex subunit alpha-2	458.216	5986.65	15551.1	23987	18463.9	15411.3	5305.38	3589.48	9323.73	13853.3	2650.46	11841.2	9293.9	6934.83	5833.86	4864.6
KGPSTVTDLEETKR	P03889	AP-2 complex subunit alpha-2	827.819	1346.6	371.839	1326.52	895.806	732.952	N/A	N/A	1900.68	1352.55	888.459	N/A	N/A	902.512	378.133	514.491
VGLIALK	P03889	39S ribosomal protein L3, mitochondrial	244.597	148.22	156.661	229.701	341.054	N/A	407.788	337.493	307.105	317.015	288.426	169.433	N/A	318.184	243.422	420.017
ATNLTVSAVR	P04177	Carnitine O-palmitoyltransferase 2, mitochondrial	7893.52	7891.48	7107.46	8221.19	8596.17	8527.8	8023.84	9166.3	9221.67	8921.41	8139.31	6132.59	10032.7	9902.29	8074.49	9461.83
LIFDGNEETLK	P04182	Carnitine O-palmitoyltransferase 2, mitochondrial	4566.86	8279.38	6959.16	7247.41	8265.75	8502.81	7980.54	8362.93	7508.75	7835.15	7393.54	8697.36	9069.8	8172.38	8164.58	8272.58
YILSDSSPVPEFPVAYLTSENR	P04182	Carnitine O-palmitoyltransferase 2, mitochondrial	948.009	1824.28	4681.64	6855.64	9620.57	7814.01	2359.18	2497.4	4337.57	4230.94	3457.44	6203.77	6536.86	4093.27	4277.24	3726.36
TLSIDSIQFQR	P04182	Carnitine O-palmitoyltransferase 2, mitochondrial	6358.59	8299.02	10593	9928.49	10715.5	7730.66	14181.6	10964.4	6998.02	14743.4	7069.77	7867.15	7620.1	8477.95	7750.42	11807
GGPNIITLADIVK	P04182	Casein kinase II subunit alpha	11207.9	31724.1	22905.4	33806.5	44907.5	44423.8	16938.6	22785.6	30129.1	20971.1	21368.6	32273.6	45365.1	34538.3	27079.3	27337.1
FNDILGR	P04256	Casein kinase II subunit alpha	11560.8	10837	10384.8	12173.1	11785.1	14646.3	11232.3	12503.8	11878.8	10989	13016.4	12407.3	10870.9	12451.3	15004.8	14783.2
VLGTEDLYDYIDK	P04256	Casein kinase II subunit alpha	2347.75	2915.1	3173.6	4396.99	3060.75	5063.57	3214.38	2985.73	3891.68	3047.91	3142.85	4611.22	4404.06	3471.25	4796.76	4262.07
QLYQTLTDYDIR	P04636	Casein kinase II subunit alpha	2401.14	1722.8	990.695	1397	1318.36	2415.34	1096.45	1745.89	1503.16	2290.91	1838.53	1488.02	1801.31	2327.65	1860.23	2041.88
YSEVFEAINITNNEK	P04636	Casein kinase II subunit alpha	1554.57	1053.53	956.629	822.681	175.929	N/A	1574.78	820.15	619.731	656.599	880.03	N/A	N/A	1005.45	726.421	684.719
DIEEIIDELR	P04636	NADH dehydrogenase [ubiquinone] flavoprotein 2, mitochondrial	608.916	1009.51	1722.82	1254.57	1638.15	2456.02	1148.45	1387.4	815.591	1583.2	2018.81	2211.54	982.308	1176.9	2244.19	1813.21
AAAVLPVLDLAQR	P04636	NADH dehydrogenase [ubiquinone] flavoprotein 2, mitochondrial	2712.16	N/A	3683.47	5881.99	4794.69	8546.21	3785.96	6536.24	4139.17	3836.14	5918	7242.65	6304.62	5061.22	6448.33	5334.37
TPSLPTPPTR	P04636	Microtubule-associated protein tau	33689.3	37330.8	42768.7	66761.9	49584.6	62453.8	60513.2	40567.4	28177.7	48812	35387.8	43418.2	71621.6	45249.9	107719	57668.6
SVSASGVSGETTSIPGFPAEGSIPLPADFFSK	P04636	Microtubule-associated protein tau	498.575	2545.59	2668.41	6532.91	N/A	11848	2756.79	1038.97	1561.35	3999.95	1154.95	N/A	N/A	1811.23	4647.94	2472.76
IGSLDNITHVPGGGNK	P04636	Microtubule-associated protein tau	N/A	6330.58	6609.82	12153.8	10326.4	10618.5	10873	4634	3423.61	9458.2	4415.85	N/A	11845.7	7338.48	8520.22	7872.33
EQDLEGATVVGAPAEEQK	P04636	Microtubule-associated protein tau	1995.59	893.437	808.264	1424.27	1440.22	2156.85	1660.75	N/A	N/A	1433.8	1018.13	N/A	2502.68	914.762	2488.57	1014.44
SLFFPDEAINK	P04636	Glutamate--cysteine ligase catalytic subunit	2674.64	5759.85	6847.43	7426.19	8300.41	6913.66	7057.37	6186.63	6207.74	7035.71	5011.82	N/A	8036.67	6930.34	7353.94	7355.13
ADIAIAPLTITLVR	P04636	Glutamate receptor 2	1551.53	1848.53	2025.66	3385.42	4735.43	3445.76	1196.21	1155.77	3087.93	2709.95	1227.8	928.249	3606.51	2323.78	1716.23	1870.17
ADIAVAPLTITLVR	P04636	Glutamate receptor 3	635.51	1808.41	1066.08	2277.34	1557.2	1626.02	951.171	817.101	1608.92	1484.29	1084.75	N/A	1865.15	1726.07	969.472	890.147
IAQLEEIK	P04636	ATP synthase F(0) complex subunit B1, mitochondrial	79200.8	93856.6	105379	86786.8	91150.1	106301	112766	107088	95954.4	81370.6	80734.8	114209	83469.6	86859.8	99829.2	124789
YGASIGEFIDK	P04636	ATP synthase F(0) complex subunit B1, mitochondrial	24891.8	21134.4	23752.4	23519	21619.1	23657	27402.2	28475.6	18930.6	18937.7	21428.9	30964.4	25428.3	25881.2	31937.8	24775.5
HVIQSISAQQEK	P04642	ATP synthase F(0) complex subunit B1, mitochondrial	6112.85	8434.32	8225.76	6340.26	6893.93	8058.44	7182.83	8086.36	6481.24	6410.1	6795.59	8863.79	6218.22	7606.34	9250.08	8699.26
HYLFDVQR	P04642	ATP synthase F(0) complex subunit B1, mitochondrial	20783.7	51366.8	17433.6	13742.6	21782.8	14111.8	22232.1	23541.2	18912.5	19849.7	21750.1	22251.3	20930.8	23616.5	24574.2	24026.3
LGLIPEEFFQFLYPK	P04642	ATP synthase F(0) complex subunit B1, mitochondrial	84.6133	8089.85	4043.22	N/A	2907.94	N/A	5395.5	1730.21	4519.3	7662.17	3660.26	3115.19	3554.33	5468.08	5636.89	7202.02
LDYHISVQDMMR	P04642	ATP synthase F(0) complex subunit B1, mitochondrial	1879.14	4741.49	3432.34	4999.27	3662.92	4520.51	1673.51	2072.7	5046.89	5462.16	1468.32	2608.51	1876.46	4421.93	2254.66	3851.39
FTVLTESAAK	P04642	Neurofilament light polypeptide	2559.15	9632.54	10439	20138.1	10183.6	22966.6	12684.7	11953.4	8155.83	10824.9	9278.93	12559.8	13955.4	12000.3	12857.3	15575.6
FASFIER	P04642	Neurofilament light polypeptide	1406.43	6217.97	7148.79	11498.2	5907.27	10365.2	7073.21	6772.32	4006.04	6140.66	5228.51	7093.52	6464.59	6083.21	6493.66	9354.33
LLLLGTSNSGK	P04642	Guanine nucleotide-binding protein G(z) subunit alpha	11419.8	19110.4	19377.7	20695.8	21945.6	19198.1	19727.3	18001	18353.4	20107.1	16970.6	17349	21809.2	19925.8	19913.4	22932.7
SSEYHLEDNAAYYLNDLER	P04642	Guanine nucleotide-binding protein G(z) subunit alpha	3234.96	2048.75	567.304	897.668	1145.08	N/A	2231.07	2422.85	1291.97	1478.7	3079.12	2874.28	2961.54	2585	3235.58	2408.29
IAAPDYIPTVEDILR	P04642	Guanine nucleotide-binding protein G(z) subunit alpha	2614.35	12968.4	7231.27	8782.68	22031.6	23758	4141.73	3788.8	10240.2	5888.8	4962.06	9983.3	18269.8	11417.9	7216.42	6415.44
GQNTYEEAAVYIQR	P04644	Guanine nucleotide-binding protein G(z) subunit alpha	3233.81	3510.1	1756.48	1435.86	1414.37	2505.98	3493.92	3406.91	1982.36	1632.48	2319.88	2044.96	N/A	2158.58	1609.07	2748.61
AYDAVQLFALTGPAESK	P04644	Guanine nucleotide-binding protein G(z) subunit alpha	2182.61	3830.81	2961.99	2512.78	4101.6	4338.86	2366.85	2316.98	2286.15	1890.34	3216.85	3129.24	3661.13	3215.04	2910.26	3578.22
IIHSGGFNLEACK	P04762	Guanine nucleotide-binding protein G(z) subunit alpha	3677.08	1977.98	2076.28	2177.87	2230.67	1891.66	1926.25	1005.16	1375.07	2467.02	1609.35	455.23	1447.95	1792.9	814.719	1448.46
EYKPLIIYNAIDSLTR	P04762	Guanine nucleotide-binding protein G(z) subunit alpha	998.006	2529.39	1156.16	N/A	3025.25	N/A	1491.32	1878.98	2123.75	2239.53	1769.37	N/A	2968.38	2710.29	1263.21	1762.25
GEITPELLGVMR	P04762	Guanine nucleotide-binding protein G(z) subunit alpha	1725.02	5122.21	6182.05	8487.64	9504.37	6691.41	6630.58	5081.41	7470.38	6345.25	3318.68	6247.3	5885.91	6925.71	2611.91	4744.01
DVVLIGEQAR	P04764	Guanylate cyclase soluble subunit alpha-1	31301.4	29357.3	26017.1	28702.4	28912.3	29672.2	33263.5	35836.5	28607.1	26849.5	31041.2	36623.2	34091.4	31376.4	39363.4	30360.1
LNLALQR	P04764	Guanylate cyclase soluble subunit alpha-1	7745.04	9598	7117.49	9056.61	9030.73	9989.85	7823.92	8264.83	8532.79	9927.44	7540.05	7303.75	12044.5	8957.46	9297.48	9704.73
LIFPEFER	P04764	Guanylate cyclase soluble subunit alpha-1	5903.88	7515.74	7347.14	6503.16	8308.75	9638.45	8324.68	7488.4	9754.72	6654.76	6287.23	9690.31	8311.38	8544.6	9456.62	7689.27
DCPGFVFTPR	P04764	Guanylate cyclase soluble subunit alpha-1	6698.79	6510.54	6993.22	7461.19	4936.16	7028.19	6831.66	6741.69	5878.71	5563.52	6265.41	5029.24	6737.14	6829.37	8017.81	7834.56
INVSPTTYR	P04764	Guanylate cyclase soluble subunit alpha-1	7811.08	4793.41	6149.78	6007.37	4780.18	6240.16	5244.59	6586.73	5086.44	5692.83	6084.08	7072.97	5257.83	5077.87	7183.3	6622.13
DFLNSFSTLLK	P04764	Guanylate cyclase soluble subunit alpha-1	382.288	2516.47	2015.79	3127.54	3165.6	3874.67	526.841	677.528	1942.4	2518.72	887.748	2054.05	4888.76	1842.21	1532.26	1160.7
TTALLLPGIIK	P04764	Guanylate cyclase soluble subunit alpha-1	2322.32	3690.88	2527.22	4293.72	4686.75	6421.85	1700.36	2615.17	4695.85	3864.99	2409.9	2932.52	6115.87	4409.15	2782.96	3700.73
DLAILQLGNGIR	P04764	Guanylate cyclase soluble subunit alpha-1	1147.39	2277.85	2996.24	2288.22	4069.58	2542.16	1673.6	2296.98	2759.47	2473.34	2115.07	3926.96	3800.3	2913.37	3711.94	N/A
FDQQCGELDVYK	P04764	Guanylate cyclase soluble subunit alpha-1	3406.36	785.287	1707.85	1521.48	1524.04	2320.12	2308.38	1438.81	2098.49	1545.55	1955.06	1197.46	1374.89	1204.54	1351.74	1496.98
VETIGDAYCVAGGLHR	P04764	Guanylate cyclase soluble subunit alpha-1	6197.43	6241.61	5672.22	6272.65	4887.86	4750.84	7583.36	5567.68	5190.39	5403.02	5315.64	6556.82	5810.32	4683.43	5908.65	3812.06
DRPFFPGLVK	P04764	Nucleoside diphosphate kinase B	1401.48	4240.93	3187.14	2234.27	3505.51	1467.47	2785.26	2555.81	2553.98	2717.69	2267.78	2011.61	1513.53	2208.41	N/A	3407.54
GNVGFVFTK	P04764	60S acidic ribosomal protein P0	18841.1	20681.9	19025.1	19382.7	21444	19923	17071.4	19246.4	16930.2	17900	19807.6	15972.4	16274.4	23543.3	16967.5	25953.3
CFIVGADNVGSK	P04785	60S acidic ribosomal protein P0	13864.3	14212.7	18001.9	15424.5	14937.9	15196.1	20149.4	17455.1	14276.3	15012.4	17108.9	19695.6	14044.3	16560.2	19034.8	22777.2
AFLADPSAFAAAAPVAAATTAAPAAAAAPAK	P04785	60S acidic ribosomal protein P0	4875.17	11851.6	17016.2	15141	50504.2	50842.9	8386.73	8702.9	13700.4	14867.2	13478.3	21901.7	22672.2	17205.1	20511	19834
AGAIAPCEVTVPAQNTGLGPEK	P04785	60S acidic ribosomal protein P0	3003.38	1911.55	10685.4	7664.54	7571.73	11131.8	10896	7766.45	6943.72	5846.62	10416.9	11628.2	5880.92	8956.72	10206.6	11733.1
TSFFQALGITTK	P04785	60S acidic ribosomal protein P0	2575.28	6704.27	4685.36	6347.49	8954.64	7826.82	3227.36	5303.02	6402.07	5342.42	3971.46	3948.15	6294.82	8305.73	3865.22	5848.21
IIQLLDDYPK	P04785	60S acidic ribosomal protein P0	3998.4	6773.52	5473.52	6659.12	5390.37	7017.77	4538.9	6223.97	3870.83	4585.72	5095	4911.53	4175.78	3600.9	6037.14	6772.54
GTIEILSDVQLIK	P04785	60S acidic ribosomal protein P0	3493.84	4544.72	3032.56	2602.54	881.605	1195.41	4509.46	6305.37	2267.36	2027.54	2842.48	2913.07	3463.65	2318.21	2059.76	3430.06
VLALSVETDYTFPLAEK	P04797	60S acidic ribosomal protein P0	2099.56	2921.63	1053.51	814.09	N/A	N/A	2243.13	4019.44	942.396	420.926	N/A	N/A	873.884	903.707	1391.39	1860.64
DYFISCPGR	P04797	Hemopexin	18737.5	25217.4	36750.9	22779	21979.8	14202.3	23707.7	28288.2	16172.5	14105.8	49997.3	20378.9	26757.4	45155.5	41679.4	17882.7
ELGSPPGISLDTIDAAFSCPGSSK	P04797	Hemopexin	3095.03	9432.06	38716.1	24368.5	25911.1	18893.8	10276.2	11398.6	12077.4	9201.31	25742	17247.2	19058	28494.6	30190	9771.4
NPVTSVDAAFR	P04797	Hemopexin	13473.4	15880.8	25877	16406.5	13840.3	11035.4	13701.8	15944.8	10631.9	9358.25	23059	10911.1	14143.2	24810.8	20355.4	9150.42
GPDSVFLIK	P04797	Hemopexin	8435.44	15461.5	21952.9	12309.6	12655.4	6719.38	11318.6	10980.2	7943.65	5843.78	20848.9	8153.12	12353.5	23658.7	18378.4	7751.6
GGNNLVSGYPK	P04797	Hemopexin	5559.04	8345.71	15010.8	9264.05	7630.81	5286.08	6097.44	8824.61	4785.06	4112.89	15161.4	6886.31	8098.66	16071.2	13698.1	5376.05
FNPVTGEVPPR	P04797	Hemopexin	13909.4	7661.76	48773.8	33229.3	22356.6	11764.9	5111.66	23362.1	9715.17	10224.4	48324.9	9591.89	8895.56	12107.1	39075.7	5621.63
LFQEEFPGIPYPPDAAVECHR	P04797	Hemopexin	2744.32	2996.58	10944.4	3432.75	3833.32	N/A	3210.06	4189.8	1771.9	2963.16	8983.42	1152.74	2105.11	6995.48	8641.65	N/A
GECQSEGVLFFQGNR	P04797	Hemopexin	4108.83	9047.83	8546.03	5744.03	5336.75	2151.41	5156.05	6093.61	1995.44	3256.86	8787.25	3533.31	6465.15	7862.04	11425	3105.13
SSPAITLENPDIK	P04897	NADH-cytochrome b5 reductase 3	10114.8	11199.5	10799.5	11784.1	11399.9	10229.4	11284.4	13473.5	8802.28	10354.3	11037.7	13687.5	11153.3	10677.5	11054.4	12277.9
DLVLLGEQFR	P04906	Guanylate cyclase soluble subunit beta-1	13469.3	14246.7	14088.6	16858.1	20720.4	18944.2	13540.9	15690	18223.1	13252	14106.6	22234.1	20713.1	16138.5	19121.3	19297
INVSEYTYR	P04906	Guanylate cyclase soluble subunit beta-1	13851.7	10294.9	8863.14	10811.3	9837.05	10509.9	12530.9	11696.4	10674.1	10249.5	10948.9	12393.4	14303.1	11167.4	15119	11596.6
TYDLVAAASK	P04906	Guanylate cyclase soluble subunit beta-1	7387.38	4848.62	5973.51	7256.38	6904.47	7250.14	7087.57	6909.27	7154.18	6038.61	5831.14	6873.77	6534.92	6960.97	6695.06	6562.7
IVNLLNDLYTR	P05065	Guanylate cyclase soluble subunit beta-1	3495.85	9064.12	7381.28	9517.09	10162.6	9567.48	5903.01	7131.71	11499.5	8097.19	5611.73	8348.46	11718.1	10083.2	7909.28	5258.38
VLPQLQPGK	P05065	Guanylate cyclase soluble subunit beta-1	7201.61	5079.66	6690.2	7409.9	6477.37	5775.35	5733.86	5952.11	5759.16	6305.29	5985.47	5244.92	4767.62	5147.69	5153.37	5365.76
ISPYTFCK	P05065	Guanylate cyclase soluble subunit beta-1	4784.03	3118.04	3841.4	4862.84	4179.31	3574.59	4880.07	4557.55	3739.58	4851.01	4574.38	2670.21	4532.77	3421.38	3612.78	4228.3
YCLFGNTVNLTSR	P05065	Guanylate cyclase soluble subunit beta-1	1209.71	2767.55	1903.7	2052.03	1161.09	N/A	N/A	1625.31	2400.45	2388.17	1346.2	N/A	2309.87	3052.7	N/A	869.364
TDTLLYSVLPPSVANELR	P05065	Guanylate cyclase soluble subunit beta-1	1140.46	2928.61	2279.63	3963.93	N/A	5589.3	1563.24	1659.76	2428.41	2611.34	1548.56	4231.72	4573.97	2547.26	4108.11	2304.34
GLYLSDIPLHDATR	P05065	Guanylate cyclase soluble subunit beta-1	2993.24	3714.59	4659.28	3313.23	5869.41	4638.18	3006.54	4960.59	5337.52	3180.17	4608.5	4571.69	6475.03	3168.07	3422.04	5031.8
EGLQDIVIGIIK	P05065	Guanylate cyclase soluble subunit beta-1	2206.98	7797.15	6790.83	9118.59	18082.8	9595.78	3627.56	3634.35	6727.1	7756.26	5144.53	8949.21	13763.3	7969.78	8640.07	7164.14
EAQLDEEGQFLVR	P05065	Guanylate cyclase soluble subunit beta-1	7647.76	6541.87	4610.15	6635.22	4866.55	6604.17	8050.2	8061.73	5707.33	5288.62	6478.78	9962.96	8606.14	6267.56	7734.22	6333.44
LTQELEILTDR	P05065	Guanylate cyclase soluble subunit beta-1	4640.09	4596.94	4134.69	4442.69	3438.34	2455.36	4782.04	5033.58	4643.82	3291.99	4205.27	3661.14	4749.09	3403.17	4785.35	3670.59
SEECDHTQFLIEEK	P05065	Guanylate cyclase soluble subunit beta-1	2948.03	1596.62	1138.95	1979.69	1497.64	717.131	1348.88	875.214	1873.95	2055.54	1180.77	774.228	1005	897.406	1046.26	N/A
NVIEAVYNR	P05197	Protein phosphatase 1A	7027.17	7756.95	6882.67	6818.77	6928.05	6959.37	6111.44	8837.23	6863.69	7672.07	8160.3	7870.76	9226.61	7767.14	9044.19	7225.23
GPTEQLVSPEPEVHDIER	P05197	Protein phosphatase 1A	2450.43	2543.63	3230.73	2140.33	3572.57	3097.13	2692.08	3142.36	3094.04	3207.08	3205.86	3094.3	3552.23	2955.47	N/A	3734.06
IINEGAAILR	P05197	Serine/threonine-protein phosphatase 2B catalytic subunit beta isoform	10075.5	6088.04	5923.15	6426.84	6967.79	N/A	5061.64	5401.91	5613.31	6605.02	6094.39	N/A	6834.33	4542.16	6838.75	6923.23
ILIGSSFPLSGGR	P05197	Protein-arginine deiminase type-2	7041.18	13541	13638.7	20402	21302.9	22173.4	11273.2	12981.6	22475.8	12938.9	11049	14959.7	19057.6	17526.6	12498.7	12945.3
GFPVVLDSPR	P05197	Protein-arginine deiminase type-2	10771.3	10919.2	10701.1	12857.3	11029.8	12206.8	11828.3	12992	12783.7	10573.1	11251.9	13153	13377.6	12617	13985.2	12434.7
DIIDLPALFK	P05197	Protein-arginine deiminase type-2	1156.71	11999.5	11239.1	18149.6	32587.9	38935.1	4589.79	2518.55	10025.8	14367.5	6863.48	13369.7	24237.6	11945.7	7561.28	12922.3
QLLGPDFGYVTR	P05197	Protein-arginine deiminase type-2	3265.51	3817.57	4038.74	4796.53	4277.03	4588.86	3577.78	4046.26	4523.97	4240.81	4475.94	4582.89	4406.97	4929.02	5706.57	3977.87
VGVFYVENPFFGQR	P05197	Protein-arginine deiminase type-2	2027.9	3447.57	2222.45	1766.34	4742.06	2355.74	1770.89	2218.89	2753.14	3505.23	2145.36	3866.24	3658.91	3435.61	2384.37	2786.32
FLGEVHCGTNVR	P05197	Protein-arginine deiminase type-2	1975.51	1410.9	2365	1775.96	2317.76	N/A	769.751	825.915	1523.51	1559.8	2097.4	1154.1	1870.37	1222.33	830.219	1198.88
VNSGAFPAPIEK	P05197	Ig gamma-2A chain C region	3624.41	5328.39	10131	7702.79	2433.76	6265.26	3904.55	3484.37	1406.22	2214.79	5722.14	9782.37	7622.1	6468.54	5560.48	10028.7
SVSELPIVHR	P05197	Ig gamma-2A chain C region	N/A	3090.2	6500.44	5462.89	1441.39	3725.46	1976.09	N/A	N/A	1666.32	3733.49	6367.4	5168.33	3835.03	3468.33	6937.41
VPDFSDYR	P05197	Cytochrome b-c1 complex subunit Rieske, mitochondrial	18147.3	16621.6	13781.2	15457.2	13776.2	18176.8	15133.5	15288.9	15538.9	13323.2	13729.2	17135.6	14722.5	15156.2	18127.8	17419.1
EIDQEAAVEVSQLR	P05197	Cytochrome b-c1 complex subunit Rieske, mitochondrial	11282.7	12406.5	10626.2	13469.6	9809.88	15988.3	14400	16649.8	10261.2	9927.97	13710.3	17991.3	11824.2	13813.3	18160.1	16674.3
VTTIVVNIYEDGVR	P05197	Phosducin	3937.66	24001	6658.4	3048.81	2139.28	N/A	4554.2	20086.1	4558.21	3849.3	11856.3	12806.7	8741.04	5513.24	12128.9	9082.95
FSSDVLPTLLVYK	P05197	Phosducin	26719.2	75087.3	101387	90505.8	97245.9	115918	29863.3	94518.4	44649.3	64626.2	104983	137663	158330	88569.6	108659	63685
EIHDLGQTNTEDEDIE	P05197	Phosducin	4789.47	10337	4144.6	2348.73	3304.2	3611.9	1692.05	10320.3	966.651	3544.61	14025.1	9398.76	7087.37	5801.04	8887.83	4285.98
MEEAASQSLEEDFEGQATHTGPK	P05197	Phosducin	2122.1	7425.58	8545.56	11068.9	11372.8	12361.6	3920.8	10188.2	5738.98	4998.79	11051.8	18140	7185.12	5202.43	7020.6	7186.24
GCDALNSSLECLAAEYPMVK	P05197	Phosducin	394.643	4900.49	15859.5	8576.56	6123.37	7994.85	4305.38	11828.1	3715.97	6616.04	8500.21	14106.8	8110.92	6595.3	9128.77	6908.64
SLLLVLQPPAN	P05197	Alpha-mannosidase 2C1	517.261	2369.16	1486.21	2622.33	6181.57	3299.81	N/A	N/A	2268.47	2427.14	1410.65	N/A	2860.87	1756.52	2256.07	N/A
GQAGTLAVGAEGGLR	P05197	Alpha-mannosidase 2C1	8256.34	4222.32	4074.84	4782.85	4700.05	5115.54	4076.16	5489.05	4867.91	4228.41	4338.66	4462.3	4955.6	4277.74	4994.01	4145.01
VQLSSPGQLFTALER	P05197	Alpha-mannosidase 2C1	1677.51	1587.75	1538.86	1612.23	2344.1	1889.75	1201.21	1389.4	1910.19	1766.7	1541.91	1846.87	2235.22	2132.3	1625.67	1303.21
SAQFLYPAVQLQR	P05197	Alpha-mannosidase 2C1	3124.24	2526	2013.53	N/A	2621.26	N/A	1396.85	2074.13	2505.22	2470	2263.14	N/A	2860.26	2398.68	N/A	2152.7
[truncated: 4,466 more rows]
